# Supplementary material for: Quantitative glycoproteomics reveals cellular substrate selectivity of the ER protein quality control sensors UGGT1 and UGGT2
Source: eLife. 2020 Dec 15;9:e63997. doi: 10.7554/eLife.63997 (PMC7771966; doi:10.7554/eLife.63997)
Supplement: Figure 1—source data 1. [file elife-63997-fig1-data1.xlsx]

## Sheet: Sheet1
Accession	Bio Rep 1 Fold increase	Bio Rep 2 fold increase	Avg fold increase	Standard Error		TMT quantifiaction results for Figure 1C , derived from TMT mass spec data in Supplemental table 1. Fold change reports on the TMT label quantification in the WT-CRT channel divided by the Y109A-CRT channel.
P05556	9.05134	43.5924	26.3219	3.00642
Q15904	20.5283	20.3478	20.4381	0.0157084
Q9BTY2	9.35581	28.9036	19.1297	1.70142
P35556	3.54116	29.5556	16.5484	2.26426
Q14126	10.0234	22.2381	16.1308	1.06315
Q86YB8	4.2637	25.4706	14.8671	1.84582
P12109	23.7724	5.66667	14.7195	1.5759
P16278	8.23516	18.875	13.5551	0.926079
P08069	13.922	11.8519	12.8869	0.180186
P11717	12.1466	12.9278	12.5372	0.0679948
Q92542	16.2324	8.53333	12.3828	0.670114
Q6NUS6	18.6535	5.96491	12.3092	1.1044
P11047	7.88918	16.5	12.1946	0.749476
O75976	9.44798	14.9366	12.1923	0.477722
Q08380	7.38436	16.5779	11.9812	0.800199
P07602	17.3246	5.37304	11.3488	1.04025
O15118	12.348	6.58209	9.46504	0.501857
P22413	10.0023	8.89381	9.44807	0.0964851
O94813	11.0357	7.68293	9.35934	0.291825
P15586	11.5234	7.07735	9.30037	0.386978
Q07954	2.60899	15.0385	8.82373	1.08185
Q8TEM1	8.19634	8.43703	8.31668	0.0209495
P06213	7.8331	7.05828	7.44569	0.067439
Q96AY3	7.88737	6.98652	7.43695	0.0784089
Q92820	6.81571	7.29167	7.05369	0.0414265
O00469	8.96012	3.78889	6.3745	0.450098
P08581	9.57143	2.68852	6.12998	0.59908
P04062	4.98196	6.39416	5.68806	0.122917
P07686	2.2582	7.97098	5.11459	0.497233
Q02809	4.70903	4.67626	4.69264	0.00285218
P06280	3.57923	5.54468	4.56196	0.17107
Q92626	6.86523	2.06414	4.46468	0.417881
Q8IV08	5.67837	2.46269	4.07053	0.27989
O14773	2.66099	5.35185	4.00642	0.23421
Q13308	3.88553	3.73154	3.80854	0.0134028
P06865	5.11748	2.42529	3.77138	0.234325
P55268	2.44398	4.99183	3.7179	0.221761
