# Supplementary material for: Quantitative glycoproteomics reveals cellular substrate selectivity of the ER protein quality control sensors UGGT1 and UGGT2
Source: eLife. 2020 Dec 15;9:e63997. doi: 10.7554/eLife.63997 (PMC7771966; doi:10.7554/eLife.63997)
Supplement: Figure 2—source data 1. [file elife-63997-fig2-data1.xlsx]

## Sheet: Sheet1
Accession	898bio1fold change avg	898 bio2 fold change avg	899bio1 fold change avg	899 bio2 fold change avg	898 avg	899 avg	898 Standard error	899 Standard error
Q04900	0.984057	2	35.8372	11.2557	1.49203	23.5464	0.507972	12.2908				TMT quantifiaction results for Figure 2A and Figure 2B, derived from TMT mass spec data in Supplemental table 1. Fold change reports on the TMT label quantification in the WT-CRT channel divided by the Y109A-CRT channel. Note that any proteins below 3 fold in both cell lines will not be depicted in the associated bar graph.
Q9H3G5	3.63478	7.77487	23.3869	10.1278	5.70482	16.7574	2.07005	6.62957		Note:
P12109	1.30354	2.46536	11.9411	10.8899	1.88445	11.4155	0.58091	0.525594		898: ALG6/UGGT1-/-
Q99538	2.87591	4.57696	10.3835	12.0781	3.72643	11.2308	0.850524	0.847291		899: ALG6/UGGT2-/-
P11717	2.75685	5.36398	10.8979	11.5344	4.06041	11.2161	1.30357	0.318276
P22413	3.59329	7.34609	11.5895	10.3382	5.46969	10.9639	1.8764	0.625659
Q15904	2.99808	4.14815	6.41453	13.8973	3.57311	10.1559	0.575036	3.74137
O75976	3.2376	4.95929	8.92816	11.0393	4.09844	9.98372	0.860847	1.05557
P08069	1.72844	2.46587	11.2588	8.4891	2.09715	9.87394	0.368715	1.38484
Q6NUS6	2.30008	2.57344	8.97638	10.3879	2.43676	9.68212	0.13668	0.705733
O00469	2.49461	3.87132	8.09364	9.81658	3.18297	8.95511	0.688357	0.861469
Q8TEM1	1.47685	3.10026	7.73333	9.58262	2.28856	8.65797	0.811701	0.924646
Q96AE7	4.86249	6.85305	8.63095	8.28426	5.85777	8.4576	0.99528	0.173345
Q92820	5.54023	7.94731	7.73978	8.67519	6.74377	8.20748	1.20354	0.467706
Q9BTY2	4.1865	7.17032	9.04134	7.34021	5.67841	8.19077	1.49191	0.850565
P07602	1.14532	1.84841	9.02723	7.34903	1.49686	8.18813	0.351545	0.839104
Q08380	6.18661	8.59051	7.99121	8.37759	7.38856	8.1844	1.20195	0.19319
Q14126	0.958391	1.36424	7.59817	8.71796	1.16132	8.15806	0.202924	0.559897
Q8WTV0	3.79695	4.65072	6.41799	9.54167	4.22384	7.97983	0.426882	1.56184
Q9UIW2	1.66667	2.38235	8.13953	7.18462	2.02451	7.66208	0.357843	0.47746
Q13740	0.898878	1.93397	8.21783	6.91675	1.41642	7.56729	0.517545	0.65054
P15586	4.82593	7.28819	6.28514	8.63467	6.05706	7.4599	1.23113	1.17476
O15118	2.37827	1.76015	7.30641	7.50259	2.06921	7.4045	0.309057	0.098092
P38571	2.94352	6.39454	6.54708	8.12881	4.66903	7.33794	1.72551	0.790864
P16278	4.82774	7.80946	6.36729	7.73287	6.3186	7.05008	1.49086	0.682787
Q02809	5.55831	4.66838	6.61781	7.38295	5.11334	7.00038	0.444967	0.382571
O94813	1.92748	3.25985	7.16495	6.74651	2.59367	6.95573	0.666184	0.209221
Q6UWL2	1.63423	2.41255	7.15864	6.49104	2.02339	6.82484	0.389157	0.3338
P08236	4.14507	4.71214	7.48575	6.09471	4.4286	6.79023	0.283538	0.69552
Q8NAT1	2.90741	4.23514	7.08258	6.39682	3.57127	6.7397	0.663864	0.342882
Q92542	1.74551	2.64797	6.84365	6.58052	2.19674	6.71208	0.45123	0.131567
Q92626	5.09026	6.54054	6.87553	6.38125	5.8154	6.62839	0.72514	0.247142
Q96AY3	2.35683	3.01466	5.65678	7.55938	2.68575	6.60808	0.328913	0.9513
Q8NBJ5	2.20124	2.75602	6.62679	6.47273	2.47863	6.54976	0.277388	0.0770323
P06756	1.26366	1.8708	5.04447	7.89106	1.56723	6.46777	0.303569	1.42329
P05556	4.10703	5.32006	6.02002	6.91496	4.71354	6.46749	0.606515	0.44747
P11047	1.87873	3.29161	5.80068	5.82462	2.58517	5.81265	0.706437	0.0119689
P06213	2.00424	3.92894	5.78034	5.80408	2.96659	5.79221	0.962347	0.0118685
Q13308	1.22439	1.40664	5.44877	6.07605	1.31552	5.76241	0.0911268	0.313638
O94898	3.58879	5.61836	5.48485	5.91469	4.60357	5.69977	1.01479	0.214922
Q9NYU2	0.268657	0	6.22222	5.13004	0.134328	5.67613	0.134328	0.546089
P04066	7.00016	6.95728	5.04277	6.28408	6.97872	5.66342	0.0214359	0.620655
Q5ZPR3	1.31378	1.66813	4.68055	6.59203	1.49095	5.63629	0.177175	0.955736
A2RU67	2.0404	2.62162	4.47475	6.62	2.33101	5.54737	0.290609	1.07263
P08581	4.62977	4.04298	6.09665	4.81967	4.33638	5.45816	0.293396	0.638492
Q9Y2H2	0.35557	6.64989	8.90787	1.679	3.50273	5.29343	3.14716	3.61443
P25391	2.71621	6.99918	5.26556	5.02524	4.85769	5.1454	2.14148	0.120159
P61221	2.0839	1.98654	4.6414	5.45083	2.03522	5.04611	0.0486789	0.404717
Q9UIQ6	1.74344	2.47696	4.91798	4.92222	2.1102	4.9201	0.366762	0.00212057
Q8IWF2	3.87512	3.10268	4.90806	4.67294	3.4889	4.7905	0.386218	0.11756
P02786	1.75015	1.43072	4.68392	4.71944	1.59043	4.70168	0.159713	0.0177619
P06280	4.277	10.1261	5.92462	3.02034	7.20154	4.47248	2.92454	1.45214
Q71U36	1.49792	1.64849	4.89028	3.9765	1.57321	4.43339	0.0752868	0.456892
O00468	1.84127	3.71154	5.16667	3.54082	2.7764	4.35374	0.935134	0.812925
P06865	4.38915	5.79304	4.17915	4.31391	5.0911	4.24653	0.701946	0.0673831
Q7Z4H8	1.78409	3.19807	3.43363	4.93714	2.49108	4.18539	0.706988	0.751757
Q8NHP8	2.29345	3.1102	4.22202	3.78161	2.70183	4.00182	0.408375	0.22021
P04062	2.28718	3.20416	3.84192	3.98669	2.74567	3.9143	0.458492	0.0723833
P13473	1.00261	1.06927	3.62366	4.03302	1.03594	3.82834	0.0333301	0.204682
Q9Y4L1	2.12404	1.90501	3.91515	3.51323	2.01453	3.71419	0.109517	0.20096
P07339	1.97319	2.58155	3.8424	3.56539	2.27737	3.7039	0.30418	0.138506
P78357	1.42308	2.74274	3.34762	3.52978	2.08291	3.4387	0.659831	0.0910808
P54802	3.9497	3.49862	3.64855	3.21245	3.72416	3.4305	0.225541	0.218048
Q5T4B2	4.83378	5.74035	3.00784	3.76822	5.28707	3.38803	0.453288	0.380188
Q8IV08	1.5502	1.60446	3.76865	2.8859	1.57733	3.32727	0.0271306	0.441374
P42892	2.23298	3.48922	2.90869	3.51684	2.8611	3.21277	0.628117	0.304077
Q96JB1	0.880775	1.51439	4.71082	1.55224	1.19758	3.13153	0.316807	1.57929
O00754	2.35294	3.06401	3.11294	3.12039	2.70848	3.11666	0.355535	0.00372203
P35556	1.77189	1.89245	3.15468	3.01448	1.83217	3.08458	0.0602798	0.0700964
Q86YB8	2.45289	2.87898	2.10031	4.02509	2.66593	3.0627	0.213047	0.962388
O14773	3.85588	5.46706	3.15763	2.84831	4.66147	3.00297	0.805591	0.15466
P07686	9.85637	8.85643	2.7381	3.20818	9.3564	2.97314	0.499972	0.235037
P60468	3.76667	0.606218	3.22917	2.63636	2.18644	2.93277	1.58022	0.296402
P27708	1.48141	2.4249	2.42328	3.34113	1.95316	2.88221	0.471743	0.458925
Q07954	1.41813	1.83812	2.79405	2.71161	1.62813	2.75283	0.209998	0.0412236
P17050	14.7277	2.82591	3.20455	1.94764	8.77681	2.57609	5.95089	0.628451
P30040	1.7044	1.20292	3.07517	1.99945	1.45366	2.53731	0.25074	0.537859
P0DP23	1.69004	1.03919	3.02622	2.00662	1.36461	2.51642	0.325422	0.509797
Q13724	2.1487	2.05734	2.40181	2.612	2.10302	2.50691	0.0456794	0.10509
Q8N3K9	0.299376	2.24182	4.16346	0.763563	1.2706	2.46351	0.97122	1.69995
P27824	1.24908	1.24888	2.68144	2.24331	1.24898	2.46238	9.95081e-05	0.219069
O14874	1.0824	1.46838	2.46509	2.31038	1.27539	2.38774	0.192987	0.0773511
O96005	2.44099	2.60717	3.10018	1.66586	2.52408	2.38302	0.0830886	0.717164
Q9NVI1	1.24031	1.52849	2.82277	1.93801	1.3844	2.38039	0.14409	0.442376
Q15363	1.28445	1.30729	3.07682	1.62011	1.29587	2.34846	0.0114206	0.728357
Q9NTJ5	1.25781	3.13139	2.86813	1.81407	2.1946	2.3411	0.936787	0.527031
P63267	1.56587	1.7899	3.40194	1.26186	1.67789	2.3319	0.112014	1.07004
P52292	1.31475	1.57847	3.18956	1.43242	1.44661	2.31099	0.131857	0.87857
P23258	1.30773	1.47178	2.77431	1.81518	1.38976	2.29475	0.082025	0.479562
Q96P70	1.10204	1.66885	2.71375	1.82207	1.38544	2.26791	0.283402	0.445841
Q13616	1.12859	1.67241	3.1723	1.33589	1.4005	2.25409	0.271912	0.918204
Q9P035	1.33813	2.51648	2.06149	2.42424	1.92731	2.24287	0.589177	0.181377
Q99436	1.66075	1.69992	2.86318	1.54225	1.68033	2.20271	0.0195856	0.660464
P09936	1.16362	1.47179	2.88712	1.51335	1.31771	2.20024	0.154087	0.686888
P13667	1.57481	1.71601	2.80288	1.57443	1.64541	2.18866	0.0705983	0.614228
P78527	1.26197	1.7239	2.49263	1.86018	1.49293	2.1764	0.230965	0.316224
P15121	1.37751	1.95335	3.07279	1.27339	1.66543	2.17309	0.287918	0.8997
P60228	1.45581	1.56846	3.06957	1.26106	1.51214	2.16531	0.0563254	0.904252
P08238	1.23753	1.45347	2.864	1.43021	1.3455	2.1471	0.107969	0.716894
P02768	1.33706	1.67703	2.95245	1.32867	1.50705	2.14056	0.169984	0.811891
Q14974	1.24423	1.66746	2.5835	1.63083	1.45585	2.10716	0.211616	0.476332
Q7Z4W1	1.2731	1.45545	3.06596	1.14421	1.36427	2.10509	0.0911742	0.960877
P15289	8.03797	12.775	0	4.20833	10.4065	2.10417	2.36851	2.10417
P30086	1.36315	1.69117	2.895	1.29905	1.52716	2.09702	0.164013	0.797979
Q14738	1.19591	1.25088	2.812	1.375	1.22339	2.0935	0.0274885	0.7185
P08865	1.36203	1.90909	2.35632	1.8038	1.63556	2.08006	0.273533	0.276262
Q14232	1.27465	1.49035	3.04667	1.10744	1.3825	2.07705	0.10785	0.969614
Q9NZR1	1.32933	1.23673	2.33854	1.77137	1.28303	2.05496	0.0463044	0.283585
Q9HAV4	1.55286	1.59422	3.00511	1.08451	1.57354	2.04481	0.0206825	0.960299
P55072	1.27586	1.74038	2.91026	1.13953	1.50812	2.0249	0.232261	0.885361
Q9UHV9	1.36722	1.35127	2.63415	1.41312	1.35924	2.02364	0.00797645	0.610511
P60709	1.30348	1.53185	2.69925	1.33736	1.41766	2.0183	0.114188	0.680944
P00491	1.49588	1.17946	2.67702	1.34935	1.33767	2.01318	0.158213	0.663835
P50993	1.19832	1.48245	2.43571	1.59008	1.34038	2.0129	0.142063	0.422817
P39687	1.36842	1.35417	2.57895	1.44141	1.36129	2.01018	0.00712719	0.568771
P50395	1.1681	1.76059	2.84781	1.17194	1.46434	2.00987	0.296243	0.837933
P61457	1.46307	1.48418	2.85013	1.16714	1.47362	2.00864	0.0105597	0.841495
Q8WZA0	1.77211	0.969613	2.6911	1.32443	1.37086	2.00776	0.401248	0.683336
Q10713	1.13297	1.82254	2.83388	1.16156	1.47776	1.99772	0.344781	0.836159
P10599	1.0712	2.55062	2.92838	1.05977	1.81091	1.99408	0.739707	0.934304
P07737	1.3437	1.43955	2.69595	1.28814	1.39163	1.99205	0.047922	0.703905
P14625	1.31026	1.84546	2.49818	1.48235	1.57786	1.99027	0.267602	0.507918
P07195	1.37216	1.57766	2.81771	1.15707	1.47491	1.98739	0.102751	0.830317
Q9UBS4	1.04026	1.30873	1.88127	2.06687	1.1745	1.97407	0.134237	0.0928025
Q92734	1.01626	1.34551	2.56098	1.38351	1.18089	1.97224	0.164627	0.588735
Q9Y4R8	1.10896	1.31323	2.31008	1.63428	1.21109	1.97218	0.102133	0.337901
P04406	1.3943	1.56476	2.74962	1.17173	1.47953	1.96068	0.0852302	0.788945
P31947	1.21696	1.59741	2.68327	1.20084	1.40719	1.94205	0.190228	0.741216
P55268	1.20678	1.13386	2.10588	1.77301	1.17032	1.93944	0.0364607	0.166438
P50991	1.40693	1.20576	2.3187	1.55205	1.30634	1.93538	0.100585	0.383327
Q92616	1.12869	1.68996	2.30506	1.55975	1.40932	1.9324	0.280636	0.372653
Q8WXH0	0.549372	2.52491	3.04455	0.816578	1.53714	1.93056	0.987768	1.11398
P63241	1.39234	1.62768	2.71788	1.13705	1.51001	1.92746	0.117671	0.790415
O75347	1.60109	1.50786	2.70585	1.14292	1.55447	1.92438	0.0466158	0.781466
Q99832	1.267	1.69772	2.43773	1.39713	1.48236	1.91743	0.215361	0.520299
Q15366	1.22288	1.4164	2.48806	1.34273	1.31964	1.91539	0.0967636	0.572669
P40939	1.07107	1.5523	2.14951	1.67583	1.31168	1.91267	0.240618	0.236837
P55786	1.1347	1.79493	2.37192	1.44694	1.46481	1.90943	0.330114	0.462489
Q9Y5M8	0.896109	1.5944	2.21882	1.59684	1.24525	1.90783	0.349143	0.310993
P61313	1.19477	2.0674	2.25396	1.5481	1.63109	1.90103	0.436317	0.352931
Q9UBM7	1.02442	1.0543	2.60847	1.19167	1.03936	1.90007	0.0149398	0.708401
P00558	1.30409	1.39259	2.60431	1.18374	1.34834	1.89402	0.0442478	0.710286
P78395	1.21951	1.7861	1.89524	1.8702	1.50281	1.88272	0.283294	0.012521
Q96N67	1.15838	1.58063	2.15221	1.60562	1.3695	1.87892	0.211125	0.273292
O00303	1.35188	1.33577	2.37019	1.38196	1.34382	1.87607	0.00805287	0.494114
Q15365	1.26165	1.27941	2.47563	1.27271	1.27053	1.87417	0.00888277	0.601461
O00410	1.15443	2.15107	2.26418	1.47792	1.65275	1.87105	0.49832	0.393127
P43307	1.3257	0.883212	2.07173	1.65517	1.10446	1.86345	0.221244	0.208279
Q9Y3U8	1.37409	1.21125	2.36085	1.36533	1.29267	1.86309	0.0814195	0.497759
Q96HY6	1.38158	1.06349	2.29897	1.41909	1.22254	1.85903	0.159043	0.439941
P32119	1.39753	1.15999	2.34213	1.36611	1.27876	1.85412	0.11877	0.48801
P02100	1.51145	1.12453	2.267	1.43863	1.31799	1.85282	0.19346	0.414186
Q12931	1.26667	1.51643	2.4759	1.22857	1.39155	1.85224	0.124883	0.623666
Q5H9R7	1.32353	1.1203	2.38806	1.3125	1.22192	1.85028	0.101614	0.53778
Q13200	1.00425	1.57213	2.29024	1.40785	1.28819	1.84904	0.283937	0.441198
P61604	1.35217	1.46628	2.53757	1.16032	1.40923	1.84895	0.0570549	0.688626
Q9BPX3	1.18454	1.73003	2.37368	1.32083	1.45728	1.84725	0.272745	0.526425
Q15021	0.980692	2.19828	2.46627	1.22266	1.58948	1.84447	0.608792	0.621802
Q9UNM6	1.62295	2.00847	2.26897	1.41916	1.81571	1.84406	0.192762	0.424902
Q15185	1.31759	1.21773	2.22607	1.45748	1.26766	1.84177	0.0499269	0.384296
Q99497	1.45137	1.3482	2.65576	1.02578	1.39978	1.84077	0.051583	0.814988
P61088	1.37751	1.54612	2.46445	1.21322	1.46181	1.83883	0.0843036	0.625614
P12277	1.25724	1.25754	2.53493	1.1378	1.25739	1.83637	0.000150341	0.698562
P62861	1.41401	1.41158	2.27819	1.39379	1.4128	1.83599	0.0012158	0.442199
P06576	1.07789	1.47076	2.29053	1.3807	1.27432	1.83561	0.196436	0.454915
P49588	1.67782	2.19909	2.64505	1.02349	1.93846	1.83427	0.260634	0.810778
Q5T4S7	1.1462	1.61993	2.26103	1.40274	1.38306	1.83188	0.236864	0.429145
Q9C005	1.41721	1.71717	2.40377	1.2527	1.56719	1.82824	0.14998	0.575539
P62899	1.27407	1.45401	2.17508	1.47994	1.36404	1.82751	0.0899699	0.34757
Q15041	0.951807	1.93458	2.37805	1.275	1.44319	1.82652	0.491386	0.551524
P60174	1.47538	1.43835	2.46776	1.185	1.45687	1.82638	0.0185194	0.641381
P10809	1.21004	1.60182	2.33741	1.30925	1.40593	1.82333	0.195888	0.514083
P60842	1.36773	1.42112	2.42571	1.2122	1.39442	1.81896	0.0266944	0.606758
P61353	1.35767	1.4535	2.36428	1.25671	1.40558	1.81049	0.0479153	0.553786
P09429	1.16013	1.32695	2.58277	1.03699	1.24354	1.80988	0.0834093	0.772891
Q9BWD1	1.16634	1.24359	2.11852	1.49646	1.20497	1.80749	0.0386241	0.31103
P22061	1.54563	1.36981	2.3912	1.20919	1.45772	1.8002	0.0879091	0.591006
P14618	1.20157	1.66985	2.39802	1.18929	1.43571	1.79365	0.234137	0.604365
P62277	1.20696	1.24673	2.27567	1.30766	1.22685	1.79167	0.0198864	0.484006
P22392	1.47966	1.40458	2.38387	1.18238	1.44212	1.78313	0.0375393	0.60075
P49368	1.20142	1.36668	2.21289	1.34723	1.28405	1.78006	0.0826266	0.43283
O43175	1.1415	1.26818	2.10459	1.45444	1.20484	1.77952	0.0633375	0.325077
O00232	1.26998	1.64077	2.23498	1.32351	1.45537	1.77925	0.185395	0.455733
P30048	1.26706	1.34671	2.40358	1.15123	1.30689	1.77741	0.0398209	0.626173
P05387	1.4206	1.56008	2.16614	1.38554	1.49034	1.77584	0.0697394	0.390299
O60610	1.01463	1.22335	2.13131	1.41818	1.11899	1.77475	0.104358	0.356566
P54727	1.25652	1.05369	2.08333	1.45665	1.15511	1.76999	0.101415	0.313343
P61978	1.27932	1.26699	2.30412	1.23421	1.27316	1.76917	0.0061612	0.534958
P07237	1.4099	1.05413	1.99689	1.53223	1.23201	1.76456	0.177883	0.232329
P35613	1.02849	0.891542	1.64432	1.88473	0.960015	1.76453	0.0684732	0.120202
Q00610	1.12363	1.51583	2.3225	1.20243	1.31973	1.76247	0.196098	0.560033
P51114	1.31507	1.62153	2.1875	1.33453	1.4683	1.76102	0.15323	0.426484
P06748	1.26644	1.54986	2.23005	1.2854	1.40815	1.75773	0.141712	0.472326
Q8NC51	1.30457	1.23385	2.45455	1.04878	1.26921	1.75166	0.0353612	0.702882
P18206	1.19282	1.24116	2.37745	1.12455	1.21699	1.751	0.0241697	0.62645
Q9H3K6	1.14105	1.47966	2.30057	1.19348	1.31036	1.74703	0.169306	0.553547
P05386	1.53552	1.20196	2.25955	1.23278	1.36874	1.74617	0.166778	0.513386
P50213	1.37317	0.416084	2.54348	0.948598	0.894625	1.74604	0.478541	0.79744
P68363	0.973724	1.35413	1.7836	1.7081	1.16393	1.74585	0.190203	0.0377506
P24539	1.17699	1.44472	2.04995	1.43667	1.31086	1.74331	0.133864	0.30664
P62826	1.29935	1.38399	2.30443	1.17922	1.34167	1.74182	0.0423179	0.562608
P40227	1.21859	1.45368	2.10022	1.38339	1.33614	1.74181	0.117545	0.358414
O00764	1.13217	2.07493	2.25651	1.22459	1.60355	1.74055	0.471379	0.51596
P20290	1.43552	1.45361	2.15894	1.31954	1.44457	1.73924	0.00904545	0.419701
P61204	1.22379	1.49865	2.2075	1.27077	1.36122	1.73913	0.137427	0.468366
Q03013	0.956864	1.03923	1.74	1.73768	0.998047	1.73884	0.0411832	0.00115928
P22314	1.24483	1.49387	2.31522	1.16186	1.36935	1.73854	0.124519	0.576682
Q00839	1.20253	1.30527	2.22976	1.24633	1.2539	1.73804	0.0513722	0.49172
P55060	1.12099	1.08338	2.04948	1.42439	1.10218	1.73694	0.0188059	0.312547
P13639	1.36	1.31796	2.33644	1.1359	1.33898	1.73617	0.0210198	0.600271
P22695	0.937441	1.34475	2.0545	1.4178	1.1411	1.73615	0.203654	0.318353
P53396	1.23282	1.23409	2.33236	1.13307	1.23345	1.73272	0.000633882	0.599643
P68371	1.12523	1.26598	2.06464	1.38983	1.19561	1.72724	0.0703746	0.337404
P04075	1.33846	1.3846	2.27295	1.17934	1.36153	1.72614	0.0230679	0.546805
P62841	1.21008	0.970628	2.19494	1.25407	1.09035	1.72451	0.119726	0.470438
P61619	0.970091	1.42258	1.96656	1.47812	1.19634	1.72234	0.226244	0.244221
P00338	1.28006	1.5239	2.26582	1.17515	1.40198	1.72049	0.12192	0.545334
P05455	1.20343	1.31572	2.25271	1.1872	1.25958	1.71996	0.0561473	0.532758
Q9H773	1.43025	1.42072	2.45858	0.979382	1.42548	1.71898	0.00476623	0.7396
P06733	1.4843	1.34182	2.2408	1.19466	1.41306	1.71773	0.0712423	0.523071
P06744	1.32896	1.35701	2.2285	1.2061	1.34298	1.7173	0.0140251	0.511196
P30085	1.41701	1.40327	2.43325	0.999413	1.41014	1.71633	0.00687285	0.716918
A6NDG6	1.02508	1.15556	2.34014	1.08765	1.09032	1.71389	0.0652386	0.626243
P43487	1.42673	1.16819	2.25267	1.16793	1.29746	1.7103	0.129266	0.542371
O14980	1.17155	1.16034	1.92542	1.49408	1.16594	1.70975	0.00560351	0.215672
O60568	1.15842	0.933333	1.41935	2	1.04587	1.70968	0.112541	0.290323
Q12905	1.2767	1.57576	2.15757	1.25494	1.42623	1.70626	0.149526	0.451313
Q86V81	1.07297	1.46441	1.90682	1.50538	1.26869	1.7061	0.195721	0.200724
P07900	1.27978	1.20358	2.26736	1.14302	1.24168	1.70519	0.0380978	0.562172
B5ME19	1.42996	1.35891	2.32455	1.08439	1.39443	1.70447	0.035524	0.620083
P07437	1.15388	0.99288	1.96811	1.4399	1.07338	1.704	0.0804986	0.264104
P52209	1.14055	1.10465	2.31929	1.08466	1.1226	1.70197	0.0179491	0.617317
P49815	1	2.49254	1.64211	1.76154	1.74627	1.70182	0.746269	0.0597166
P50454	1.70538	1.22012	1.87655	1.52632	1.46275	1.70144	0.242628	0.175113
P18669	1.33373	1.79277	2.27016	1.1327	1.56325	1.70143	0.229521	0.568728
P62269	1.11959	1.40736	2.06867	1.33249	1.26348	1.70058	0.143888	0.36809
O75914	1.03037	1.4769	1.90958	1.48845	1.25364	1.69901	0.223265	0.210565
Q13885	1.16275	1.34469	2.06359	1.33434	1.25372	1.69897	0.0909689	0.364625
Q02543	1.2848	1.14462	2.14677	1.24674	1.21471	1.69676	0.0700867	0.450015
P11021	1.34578	1.24707	1.91059	1.47928	1.29642	1.69494	0.0493581	0.215655
P11586	0.986964	0.932109	1.92807	1.4614	0.959537	1.69473	0.0274273	0.233335
Q14204	1.03816	1.60435	2.08329	1.30387	1.32125	1.69358	0.283095	0.389709
Q01105	1.48001	1.46845	2.20682	1.17748	1.47423	1.69215	0.00578003	0.514671
P0DMV9	1.39611	1.18166	2.03372	1.34128	1.28889	1.6875	0.107229	0.346218
O00148	1.20143	1.27951	2.17924	1.19074	1.24047	1.68499	0.0390361	0.494248
Q15435	0.968944	1.90909	2.21138	1.14634	1.43902	1.67886	0.470073	0.53252
P15531	1.47757	1.08704	2.36621	0.991435	1.28231	1.67882	0.195265	0.687386
Q13765	1.4583	1.35314	2.09067	1.2545	1.40572	1.67258	0.0525806	0.418084
Q96AG4	1.21732	0.861224	2.14945	1.19538	1.03927	1.67242	0.178046	0.477033
P13797	1.24915	1.33841	2.24124	1.09407	1.29378	1.66766	0.0446294	0.573586
Q8IZP2	1.31551	1.44319	2.11021	1.22149	1.37935	1.66585	0.0638375	0.444359
P39023	1.24553	1.77029	2.17757	1.1497	1.50791	1.66364	0.262378	0.513937
P62258	1.28002	1.73615	2.14952	1.17774	1.50808	1.66363	0.228065	0.485889
O75643	1.14325	1.38036	2.08443	1.23764	1.26181	1.66103	0.118551	0.423392
P12956	1.3468	0.972395	1.98849	1.32612	1.1596	1.65731	0.187204	0.331182
Q8WUM4	1.10169	1.45174	2.23603	1.07298	1.27672	1.65451	0.175026	0.581521
P07108	1.09217	1.89512	2.12195	1.18699	1.49365	1.65447	0.401474	0.46748
O95433	1.03125	0.895349	1.64179	1.66019	0.963299	1.65099	0.0679506	0.00920156
P62854	1.13166	1.32855	1.96894	1.32926	1.23011	1.6491	0.098446	0.319839
P23528	1.41983	1.3711	2.17068	1.12011	1.39547	1.6454	0.0243674	0.525287
Q9NRG9	0.871287	1.77778	1.77108	1.51327	1.32453	1.64218	0.453245	0.128905
P31943	1.25207	1.36184	1.86722	1.4152	1.30696	1.64121	0.0548837	0.226008
P62424	1.29634	1.46734	1.92011	1.35343	1.38184	1.63677	0.0855026	0.283341
P29401	1.25551	0.988889	1.79739	1.47552	1.1222	1.63646	0.133309	0.160931
P62081	1.14567	1.41001	2.03352	1.23828	1.27784	1.6359	0.132173	0.397618
P25205	1.09127	1.53541	1.92145	1.34875	1.31334	1.6351	0.22207	0.286347
Q6NVV1	1.38408	1.4099	1.93565	1.33191	1.39699	1.63378	0.0129099	0.301873
P40616	1.05165	1.32429	1.89251	1.36307	1.18797	1.62779	0.136321	0.264719
Q9BUF5	1.17535	0.922431	1.6425	1.60849	1.04889	1.62549	0.126459	0.0170024
Q71UI9	0.84466	1.16031	2.15287	1.0969	1.00248	1.62488	0.157823	0.527984
P62701	1.24857	1.07635	1.81834	1.43135	1.16246	1.62485	0.0861111	0.193499
Q13085	1.04301	2.21154	1.73606	1.50641	1.62727	1.62123	0.584264	0.114825
P53999	1.3532	1.71532	1.97709	1.26293	1.53426	1.62001	0.181058	0.35708
P35579	1.21034	1.3193	2.0331	1.205	1.26482	1.61905	0.0544754	0.414051
P48643	1.18706	1.45826	1.91476	1.31846	1.32266	1.61661	0.135597	0.298151
Q14566	1.20918	1.27632	1.97196	1.25978	1.24275	1.61587	0.0335695	0.356091
Q9NZ01	0.813463	1.50591	1.73193	1.4986	1.15969	1.61526	0.346225	0.116667
P60660	1.14364	1.16692	1.95948	1.26708	1.15528	1.61328	0.0116409	0.346201
P62304	0.969592	1.28889	2.0036	1.21893	1.12924	1.61127	0.159648	0.392336
Q9UHB9	1.38515	1.78593	2.02518	1.19568	1.58554	1.61043	0.200391	0.414749
Q9NR77	1.19123	0.978506	1.90136	1.31944	1.08487	1.6104	0.106361	0.290962
P11908	1.39521	2.43609	2.17419	1.04569	1.91565	1.60994	0.52044	0.564254
P46777	1.5884	1.20343	1.87529	1.34156	1.39592	1.60842	0.192485	0.266866
O43156	0.882353	1.50562	1.5935	1.61905	1.19399	1.60627	0.311633	0.0127758
P34931	1.00124	1.21032	2.34364	0.867297	1.10578	1.60547	0.104538	0.738173
P05388	1.43095	1.23986	1.9705	1.23819	1.3354	1.60434	0.0955445	0.366154
Q15181	1.2707	1.44031	2.04983	1.15736	1.3555	1.6036	0.0848047	0.446232
Q12874	0.966942	0.959144	2.32328	0.87931	0.963043	1.60129	0.00389909	0.721983
P40926	1.32136	1.32843	2.02544	1.1769	1.3249	1.60117	0.00353429	0.424267
Q14697	1.36255	1.65399	1.89098	1.30533	1.50827	1.59815	0.14572	0.292826
P78371	1.12745	1.29339	2.02103	1.1709	1.21042	1.59597	0.0829666	0.425065
Q6DKJ4	1.36458	1.14516	2.26667	0.92233	1.25487	1.5945	0.109711	0.672168
P17987	1.273	1.21185	1.89735	1.28945	1.24243	1.5934	0.0305731	0.303954
Q9UBE0	1.15311	1.41162	2.0848	1.0975	1.28236	1.59115	0.129253	0.493648
P43686	1.29864	0.885328	1.64408	1.527	1.09198	1.58554	0.206654	0.0585408
Q8WYA6	1.02769	1.14331	2.0449	1.12531	1.0855	1.58511	0.0578105	0.459793
Q9Y5B9	0.920918	1.1816	2.06608	1.1039	1.05126	1.58499	0.13034	0.481092
P26599	1.10648	1.28721	1.9734	1.19222	1.19685	1.58281	0.0903639	0.390594
P08708	1.30916	1.17824	2.00268	1.15439	1.2437	1.57853	0.0654642	0.424145
P37802	1.3209	1.34746	2.05735	1.09694	1.33418	1.57714	0.0132811	0.480204
P08758	1.39526	1.06186	2.02184	1.13089	1.22856	1.57637	0.166701	0.445477
P49327	1.0795	1.20395	2.0342	1.11622	1.14172	1.57521	0.0622259	0.458994
Q13263	1.11325	1.28481	1.92018	1.22981	1.19903	1.575	0.0857848	0.345184
Q9UBT2	1.64023	1.00344	1.80652	1.34302	1.32183	1.57477	0.318396	0.23175
P34932	1.01968	1.24274	1.90258	1.24403	1.13121	1.57331	0.11153	0.329273
P50990	1.29938	1.23452	1.82186	1.31665	1.26695	1.56925	0.0324298	0.252605
Q15691	1.21892	1.46398	2.03163	1.08709	1.34145	1.55936	0.122528	0.47227
P59190	1.10568	1.54327	1.77363	1.34047	1.32447	1.55705	0.218796	0.216582
Q8N2K0	1.20823	0.863057	1.54233	1.57117	1.03564	1.55675	0.172584	0.0144199
P50914	1.29754	1.45097	1.72264	1.39078	1.37426	1.55671	0.0767126	0.165932
O95831	1.29543	1.14908	1.85578	1.25625	1.22226	1.55602	0.0731761	0.299765
Q04637	1.01976	1.08399	2.01634	1.08976	1.05187	1.55305	0.0321161	0.463291
O75063	1.4359	1.01481	1.5	1.60465	1.22536	1.55233	0.210541	0.0523256
Q16658	1.47074	1.01675	1.97403	1.12432	1.24375	1.54918	0.226999	0.424851
Q05639	1.15539	1.08037	1.93699	1.15671	1.11788	1.54685	0.0375073	0.390139
Q92667	1.12048	0.714916	1.67614	1.4136	0.917698	1.54487	0.202782	0.131267
P62847	1.0649	1.23743	1.68484	1.40476	1.15116	1.5448	0.0862657	0.14004
P35244	1.12423	1.25919	2.03918	1.04549	1.19171	1.54234	0.0674795	0.496846
P13010	1.3052	1.51439	1.91453	1.16623	1.4098	1.54038	0.104592	0.374153
Q02878	1.29512	1.03014	1.75431	1.32625	1.16263	1.54028	0.13249	0.214027
Q92688	1.24355	1.5822	1.97162	1.10727	1.41287	1.53945	0.169326	0.432179
P62913	1.22621	1.42481	1.88068	1.18672	1.32551	1.5337	0.0993001	0.34698
P40925	1.22238	1.16797	1.93538	1.12907	1.19518	1.53223	0.0272077	0.403155
P62937	1.28792	1.29348	1.93207	1.13021	1.2907	1.53114	0.00277672	0.40093
O60884	1.01049	1.27749	1.6327	1.42952	1.14399	1.53111	0.133496	0.101591
P62280	1.11412	1.34128	1.83332	1.22833	1.2277	1.53082	0.113581	0.302496
Q9NTK5	1.10315	1.85358	1.88586	1.17391	1.47837	1.52988	0.375214	0.355972
P48556	0.936082	1.20025	2.00911	1.03483	1.06816	1.52197	0.132082	0.487142
P27635	1.10871	1.3085	1.72137	1.32208	1.20861	1.52172	0.0998945	0.199647
P51617	1.14611	1.37043	1.51415	1.52495	1.25827	1.51955	0.112162	0.00539958
Q9H3U1	1.25491	1.24917	1.87637	1.15677	1.25204	1.51657	0.00287098	0.359801
Q04760	1.25012	1.22161	1.98561	1.04006	1.23586	1.51283	0.0142507	0.472776
P31948	1.53861	1.26233	1.79089	1.23468	1.40047	1.51279	0.138141	0.278102
P63010	0.861446	1.40921	2.04984	0.973747	1.13533	1.5118	0.273884	0.538049
P23284	1.1086	0.898154	1.96631	1.03836	1.00338	1.50233	0.105223	0.463972
P38646	1.22259	1.00546	1.88491	1.10126	1.11403	1.49308	0.108565	0.391828
Q9H9B4	0.84375	0.707447	1.34483	1.63636	0.775598	1.4906	0.0681516	0.145768
P26196	1.08866	1.63862	1.87707	1.10387	1.36364	1.49047	0.274982	0.386601
Q16576	1.2018	1.34713	1.87645	1.09682	1.27446	1.48664	0.0726679	0.389812
P36578	1.19178	1.2789	1.85483	1.11654	1.23534	1.48568	0.0435613	0.36914
Q06830	1.46858	1.03204	1.94027	1.02747	1.25031	1.48387	0.21827	0.456398
P68104	1.0687	0.933013	1.64661	1.31981	1.00086	1.48321	0.0678427	0.163399
P63104	1.28719	1.57506	1.9902	0.971503	1.43113	1.48085	0.143937	0.509347
P14174	1.88101	1.13379	1.91615	1.03591	1.5074	1.47603	0.373613	0.440119
Q00325	1.02214	1.10609	1.49389	1.45691	1.06412	1.4754	0.0419717	0.0184903
P23526	1.24054	1.37641	1.89791	1.04463	1.30847	1.47127	0.0679365	0.426641
P46776	1.42755	1.39089	1.57398	1.36718	1.40922	1.47058	0.0183288	0.103403
P32969	1.19968	1.14472	1.70021	1.23374	1.1722	1.46698	0.0274801	0.233233
Q9BUJ2	1.0969	1.01146	2.07043	0.861954	1.05418	1.46619	0.042723	0.604238
P00441	1.2079	1.16293	1.79134	1.13718	1.18542	1.46426	0.0224837	0.327082
P30046	1.55479	0.96124	1.44289	1.48451	1.25802	1.4637	0.296777	0.0208083
Q9Y277	1.31903	1.50972	1.68689	1.2403	1.41438	1.4636	0.0953453	0.223292
P30101	0.75486	0.810956	1.71045	1.21622	0.782908	1.46333	0.0280482	0.247117
P51148	1.25341	1.16787	1.60417	1.31734	1.21064	1.46075	0.0427667	0.143412
P42704	0.745628	2.99934	1.78787	1.13308	1.87248	1.46048	1.12686	0.327394
P31689	1.03706	1.21508	1.53276	1.38782	1.12607	1.46029	0.0890115	0.0724695
O75390	1.1686	0.746862	1.88947	1.02017	0.957733	1.45482	0.210871	0.43465
P23396	0.951488	1.16229	1.68078	1.22716	1.05689	1.45397	0.105403	0.226812
P25705	0.943985	1.06942	1.55785	1.34701	1.0067	1.45243	0.0627179	0.105419
Q99729	1.26843	1.09675	1.77635	1.1246	1.18259	1.45047	0.0858372	0.325876
P19338	1.33765	1.20557	1.80808	1.09101	1.27161	1.44954	0.0660394	0.358537
Q13257	1.40487	0.631016	1.72531	1.17089	1.01794	1.4481	0.386926	0.277211
Q9BXW9	1	0.569697	1.87952	1.01493	0.784848	1.44722	0.215152	0.432296
P30044	1.22136	1.20163	1.75794	1.13161	1.21149	1.44478	0.00986177	0.313167
Q9NR28	1.19708	0.648438	2.12371	0.762712	0.922759	1.44321	0.274321	0.6805
Q7L2H7	0.865131	1.91017	1.70475	1.17468	1.38765	1.43972	0.522519	0.265035
P30154	0.87732	2.1303	1.79008	1.07533	1.50381	1.43271	0.626492	0.357377
Q53GQ0	0.97549	1.22045	1.52552	1.32149	1.09797	1.4235	0.122478	0.102016
P12004	0.970417	1.4502	1.74403	1.09761	1.21031	1.42082	0.23989	0.32321
O75746	0.958506	0.898773	1.38415	1.4555	0.92864	1.41982	0.0298666	0.0356755
P06493	1.03572	1.3444	1.56304	1.26874	1.19006	1.41589	0.154342	0.147152
P11142	1.17107	0.982347	1.68439	1.1315	1.07671	1.40795	0.094361	0.276447
P52701	1.12629	1.62159	1.4882	1.32394	1.37394	1.40607	0.247649	0.0821282
Q01518	1.09937	2.04581	1.68435	1.12723	1.57259	1.40579	0.473218	0.278555
Q9NP79	1.29787	2.00387	1.81944	0.990378	1.65087	1.40491	0.353	0.414533
P60866	0.995092	1.14078	1.73663	1.07228	1.06793	1.40446	0.0728417	0.332174
Q9UJ83	1.16667	1.64045	1.85204	0.94898	1.40356	1.40051	0.236891	0.451531
P39019	1.24228	1.04445	1.68165	1.11352	1.14336	1.39758	0.0989161	0.284064
P15880	1.1531	1.29402	1.61345	1.17357	1.22356	1.39351	0.0704623	0.219941
P45974	1.11538	1.4347	1.84009	0.946575	1.27504	1.39333	0.159658	0.446755
Q15388	0.762244	1.12866	1.50723	1.27869	0.945451	1.39296	0.183207	0.114268
P46783	1.37901	0.790546	1.5469	1.23689	1.08478	1.3919	0.294231	0.155001
Q92947	0.894028	0.947788	1.46343	1.31948	0.920908	1.39145	0.02688	0.0719775
P35241	1.32151	1.13897	1.76388	1.01464	1.23024	1.38926	0.091271	0.37462
P16615	1.10843	1.06787	1.64524	1.13169	1.08815	1.38847	0.0202802	0.256778
Q9H1E3	0.863014	1.19828	2.10112	0.648855	1.03064	1.37499	0.167631	0.726134
P18077	1.28473	1.18742	1.60463	1.14128	1.23607	1.37296	0.0486522	0.231672
P62906	1.14269	1.33955	1.38867	1.34262	1.24112	1.36564	0.0984291	0.0230271
Q9NSP4	1.10364	1.165	1.67532	1.04486	1.13432	1.36009	0.030681	0.31523
O75874	1.16404	1.34317	1.61753	1.10078	1.25361	1.35915	0.0895678	0.258377
Q9BTT0	0.924984	1.40074	1.7863	0.926437	1.16286	1.35637	0.23788	0.429932
P07477	1.18154	1.23248	1.20088	1.51154	1.20701	1.35621	0.0254718	0.15533
P62266	1.08244	0.894105	1.52786	1.18296	0.988273	1.35541	0.0941682	0.172449
Q02790	0.837548	2.30651	1.78659	0.919151	1.57203	1.35287	0.734479	0.433717
P57088	1.14258	0.519733	1.47103	1.22706	0.831156	1.34904	0.311423	0.121985
P46781	0.79878	1.25515	1.61286	1.07424	1.02697	1.34355	0.228185	0.26931
P83731	1.10782	1.15428	1.58455	1.08905	1.13105	1.3368	0.0232299	0.247752
P18124	1.56941	1.04574	1.53321	1.12749	1.30758	1.33035	0.261838	0.202858
P62851	1.10731	1.12862	1.46753	1.17609	1.11796	1.32181	0.0106513	0.145722
P62917	1.09736	1.05083	1.54753	1.0775	1.07409	1.31252	0.023268	0.235015
P63208	1.07477	0.954247	1.62033	1.00337	1.01451	1.31185	0.0602598	0.308478
Q9BQE3	1.03306	0.798995	1.13223	1.48421	0.916026	1.30822	0.117031	0.17599
P54886	0.888069	1.19616	1.44697	1.16566	1.04212	1.30631	0.154047	0.140657
P30041	1.40032	1.16096	1.74086	0.869915	1.28064	1.30539	0.119681	0.435472
Q15392	0.893939	0.948565	1.53623	1.07071	0.921252	1.30347	0.0273126	0.232762
Q5JTV8	0.803069	1.22278	1.42222	1.18363	1.01293	1.30293	0.209858	0.119297
P09874	0.969682	0.982787	1.44799	1.15485	0.976234	1.30142	0.00655254	0.146571
Q13185	1.03602	0.815029	1.61538	0.967709	0.925525	1.29155	0.110496	0.323838
Q16630	1.1636	0.911483	1.47388	1.10911	1.03754	1.29149	0.126057	0.182386
O76003	0.91809	0.834852	1.65929	0.877638	0.876471	1.26846	0.0416186	0.390825
Q15645	0.963142	0.952751	1.50154	1.02797	0.957947	1.26475	0.00519579	0.236786
Q9UPT5	0.822929	0.868667	1.68967	0.824623	0.845798	1.25715	0.0228687	0.432523
P26641	1.09679	1.12072	1.18458	1.32548	1.10876	1.25503	0.011966	0.0704503
Q07021	1.09948	0.976376	1.51626	0.989415	1.03793	1.25284	0.0615539	0.263424
P24534	1.16264	1.03203	1.27588	1.22255	1.09734	1.24921	0.0653073	0.0266653
Q04837	0.937238	1.20149	1.55405	0.940108	1.06936	1.24708	0.132125	0.306972
A6NHL2	0.796078	1.47317	1.2931	1.18391	1.13462	1.23851	0.338546	0.0545977
P61254	1.24823	1.19032	1.55015	0.919373	1.21927	1.23476	0.0289558	0.31539
Q13576	0.414449	2.18376	1.34211	1.125	1.2991	1.23355	0.884656	0.108553
Q96C36	0.871548	0.835148	1.48872	0.976033	0.853348	1.23237	0.0181999	0.256341
Q96DA6	0.9416	1.21034	1.34561	1.11828	1.07597	1.23194	0.134369	0.113662
O43242	1.3958	2.26696	1.57459	0.88038	1.83138	1.22748	0.43558	0.347104
P36542	0.963421	1.018	1.11007	1.34073	0.990712	1.2254	0.0272912	0.11533
P62987	0.961465	1.31964	1.44791	1.0023	1.14055	1.22511	0.179088	0.222807
P51149	1.14171	1.43692	2.14658	0.293382	1.28932	1.21998	0.147602	0.926597
P34897	0.886359	1.01238	1.48715	0.943097	0.949369	1.21512	0.0630109	0.272024
Q9H2G2	0.974026	0.738516	1.32353	1.10345	0.856271	1.21349	0.117755	0.110041
Q8IYB3	0.932172	1.31159	1.53112	0.893271	1.12188	1.21219	0.189712	0.318923
O15067	1.29712	0.963855	1.60256	0.809091	1.13049	1.20583	0.166635	0.396737
Q8WUM0	1.47263	1.4083	1.27394	1.13095	1.44046	1.20245	0.0321664	0.0714932
P61247	1.35632	1.18584	1.46296	0.941176	1.27108	1.20207	0.0852406	0.260893
Q9UJS0	0.877824	0.9264	1.26488	1.13743	0.902112	1.20115	0.0242877	0.0637231
O60762	1.04948	0.516063	1.24294	1.15416	0.782774	1.19855	0.266711	0.0443879
O14733	0.586721	1.02522	1.31073	1.06315	0.805971	1.18694	0.21925	0.12379
Q9Y4U1	1.04365	0.763441	1.26678	1.10432	0.903544	1.18555	0.140104	0.0812272
Q14103	1.38404	1.18925	1.55115	0.809009	1.28665	1.18008	0.0973938	0.371071
Q9P0U1	0.823082	0.876283	1.34058	1.00942	0.849682	1.175	0.0266004	0.16558
O43813	1.03236	1.29123	1.183	1.15774	1.1618	1.17037	0.129437	0.0126331
P12236	0.768159	0.944509	1.2302	1.1079	0.856334	1.16905	0.088175	0.0611492
Q96ND0	0.650723	1.41976	1.21565	1.10704	1.03524	1.16135	0.384519	0.0543082
O14654	0.652271	0.738769	1.22621	1.07352	0.69552	1.14986	0.0432488	0.0763455
O75616	1.01488	0.92723	1.09929	1.18272	0.971055	1.141	0.0438255	0.0417126
P56556	0.825803	1.05751	1.23156	1.03695	0.941658	1.13425	0.115855	0.0973075
P09211	1.09008	1.05938	1.16736	1.07766	1.07473	1.12251	0.0153543	0.0448474
O15217	1.06259	1.03348	1.13399	1.09242	1.04803	1.1132	0.0145595	0.0207864
P12235	0.984853	0.892077	1.05782	1.15458	0.938465	1.1062	0.0463882	0.0483813
P05141	0.795	0.809936	1.09102	1.11629	0.802468	1.10365	0.00746819	0.0126346
P14678	0.918456	0.596306	1.13292	1.04973	0.757381	1.09133	0.161075	0.0415937
P16152	1.12752	0.820171	1.03162	1.138	0.973844	1.08481	0.153673	0.0531885
Q99623	0.899402	1.04702	1.10508	1.04849	0.97321	1.07679	0.0738077	0.0282949
P99999	2.0319	0.529073	1.23931	0.91145	1.28049	1.07538	0.751415	0.163932
P56134	0.864301	0.79336	1.05434	1.07212	0.82883	1.06323	0.0354705	0.00889047
P28161	0.988904	1.01303	1.02994	1.05921	1.00097	1.04457	0.0120629	0.0146349
P21266	0.870732	1.10139	1.07625	0.998756	0.986059	1.0375	0.115328	0.038749
Q6IAN0	0.728787	0.843857	1.17149	0.860226	0.786322	1.01586	0.0575348	0.155634
Q9UQ80	0.822051	0.778493	1.19854	0.831188	0.800272	1.01487	0.0217787	0.183678
Q9Y241	1.19482	0.181106	1.1075	0.917218	0.687964	1.01236	0.506858	0.095143
Q96A33	1.78497	0.105569	0.907975	1.10811	0.945267	1.00804	0.839698	0.100066
P67936	0.898191	1.03713	1.19906	0.816299	0.96766	1.00768	0.0694695	0.19138
Q5VYK3	0.603248	1.35693	1.30641	0.706949	0.98009	1.00668	0.376842	0.299729
P53007	0.720507	0.846576	1.00747	0.991486	0.783542	0.999477	0.0630345	0.00799157
Q9BTX1	0.531073	2.2994	1.16327	0.826087	1.41524	0.994676	0.884164	0.168589
P63173	0.70706	0.856487	0.973405	1.00302	0.781773	0.988214	0.0747137	0.014809
Q53H12	0.760026	0.928971	0.826984	1.11183	0.844499	0.969405	0.0844729	0.142421
Q02978	0.747721	0.780121	0.919407	0.983171	0.763921	0.951289	0.0162003	0.031882
Q9BXJ9	0.686689	1.90315	1.12071	0.762866	1.29492	0.94179	0.608231	0.178924
O00483	0.797565	0.827546	0.826365	1.00914	0.812556	0.917752	0.0149905	0.0913867
Q6P1L8	0.741834	0.704193	0.962471	0.842317	0.723013	0.902394	0.018821	0.0600771
P55209	0.69426	0.339864	0.775926	0.982885	0.517062	0.879406	0.177198	0.10348
Q3ZCQ8	0.691316	0.757236	0.895125	0.808047	0.724276	0.851586	0.0329598	0.043539
O94826	0.686606	0.655101	0.858324	0.821263	0.670854	0.839794	0.0157527	0.0185305
P62829	0.676559	0.712227	0.848386	0.828918	0.694393	0.838652	0.0178343	0.00973437
P56378	0.627733	0.779968	0.850364	0.810171	0.703851	0.830267	0.0761178	0.0200968
O43819	0.613573	0.709796	0.796578	0.788537	0.661685	0.792557	0.0481112	0.00402085
O95232	0.660849	0.689721	0.89642	0.67489	0.675285	0.785655	0.0144356	0.110765
Q15637	1.31502	1.08382	0.766756	0.765193	1.19942	0.765975	0.115602	0.000781331
Q8NBN7	0.665	0.481331	0.784686	0.734904	0.573165	0.759795	0.0918346	0.0248914
P27797	0.677652	0.695212	0.715431	0.766353	0.686432	0.740892	0.00877976	0.0254611
Q16795	0.855403	0.786766	0.629821	0.788729	0.821084	0.709275	0.0343186	0.079454
O95166	0.817508	0.190698	0.701098	0.66899	0.504103	0.685044	0.313405	0.016054
P60520	0.618906	0.42652	0.668638	0.611063	0.522713	0.639851	0.0961931	0.0287877
Q9BYE9	0.814587	0.772439	0.569843	0.663877	0.793513	0.61686	0.0210741	0.0470173
Q96L12	0.668499	0.296233	0.461654	0.525409	0.482366	0.493532	0.186133	0.0318778
Q9Y383	0.481906	0.753111	0.417625	0.526909	0.617509	0.472267	0.135602	0.0546421
P31946	0	0	0	0
P09543	0	0	0	0
P52815	0	0	0	0
P25398	0	0	0	0
P62244	0	0	0	0
P62249	0	0	0	0
P30050	0	0	0	0
P26373	0	0	0	0
P18621	0	0	0	0
P49207	0	0	0	0
P02708	0	0	0	0
Q9C0K3	0	0	0	0
Q9UHX3	0	0	0	0
Q13155	0	0	0	0
Q9BXS5	0	0	0	0
P53680	0	0	0	0
Q9BZZ5	0	0	0	0
P00846	0	0	0	0
O75964	0	0	0	0
O75027	0	0	0	0
Q7L1Q6	0	0	0	0
P55061	0	0	0	0
P52848	0	0	0	0
P52849	0	0	0	0
Q9Y376	0	0	0	0
Q9BY67	0	0	0	0
Q9P2E5	0	0	0	0
O43809	0	0	0	0
P53618	0	0	0	0
O14579	0	0	0	0
Q96JN2	0	0	0	0
Q9BSY4	0	0	0	0
O75534	0	0	0	0
P12110	0	0	0	0
Q13098	0	0	0	0
Q9NTM9	0	0	0	0
P17812	0	0	0	0
Q13617	0	0	0	0
Q6ZMN8	0	0	0	0
P0DN79	0	0	0	0
Q14008	0	0	0	0
Q9Y295	0	0	0	0
Q16531	0	0	0	0
P33991	0	0	0	0
Q99615	0	0	0	0
Q14919	0	0	0	0
P05198	0	0	0	0
Q9Y262	0	0	0	0
P23588	0	0	0	0
Q96A65	0	0	0	0
Q96QU8	0	0	0	0
Q8IXL6	0	0	0	0
P14324	0	0	0	0
Q96CS3	0	0	0	0
Q8N2G8	0	0	0	0
O43292	0	0	0	0
Q7Z4H7	0	0	0	0
Q7Z4Q2	0	0	0	0
P54652	0	0	0	0
Q7LGA3	0	0	0	0
Q32P51	0	0	0	0
P14866	0	0	0	0
Q16777	0	0	0	0
Q7L7L0	0		0	0
Q16778	0	0	0	0
Q9UI26	0	0	0	0
P23229	0	0	0	0
P14923	0	0	0	0
P04264	0	0	0	0
P02788	0	0	0	0
Q96FE5	0	0	0	0
P42785	0	0	0	0
Q9NZW5	0	0	0	0
Q9Y5V3	0	0	0	0
Q8NE01	0	0	0	0
Q6P4Q7	0	0	0	0
Q96S19	0	0	0	0
Q9BTE3	0	0	0	0
Q9UBX3	0	0	0	0
Q9Y3D7	0	0	0	0
Q9HC21	0	0	0	0
Q7L9L4	0	0	0	0
P22234	0	0	0	0
O94760	0	0	0	0
Q8NCW5	0	0	0	0
Q9P032	0	0	0	0
Q9H3P2	0	0	0	0
Q15758	0	0	0	0
P43490	0	0	0	0
O43929	0	0	0	0
Q6P1J9	0	0	0	0
O95394	0	0	0	0
P11940	0	0	0	0
Q9Y2S7	0	0	0	0
Q16557	0	0	0	0
Q92841	0	0	0	0
O14737	0	0	0	0
P35232	0	0	0	0
P25789	0	0	0	0
Q8TCG1	0	0	0	0
Q15084	0	0	0	0
Q14160	0	0	0	0
P06454	0	0	0	0
Q9P2R3	0	0	0	0
P46060	0	0	0	0
P46940	0	0	0	0
P63244	0	0	0	0
Q96NR8	0	0	0	0
Q9P2E9	0	0	0	0
Q9UHJ6	0	0	0	0
Q6P4A7	0	0	0	0
P08240	0	0	0	0
Q92673	0	0	0	0
O75533	0	0	0	0
P16949	0	0	0	0
Q6ZRP7	0	0	0	0
Q5UIP0	0	0	0	0
Q8N4P2	0	0	0	0
Q8NBS9	0	0	0	0
Q8WZ42	0	0	0	0
Q92481	0	0	0	0
Q9Y2S6	0	0	0	0
Q92545	0	0	0	0
Q9BTW9	0	0	0	0
Q9Y4Y9	0	0	0	0
Q9Y2C2	0	0	0	0
P36543	0	0	0	0
Q9BZH6	0	0	0	0
Q2TAY7	0	0	0	0
