# Supplementary material for: Quantitative glycoproteomics reveals cellular substrate selectivity of the ER protein quality control sensors UGGT1 and UGGT2
Source: eLife. 2020 Dec 15;9:e63997. doi: 10.7554/eLife.63997 (PMC7771966; doi:10.7554/eLife.63997)
Supplement: Figure 3—source data 1. [file elife-63997-fig3-data1.xlsx]

## Sheet: Sheet1
Man6P	Bio rep 1													Note
897			898			899			1/2 ko					897: ALG6-/-
WCL	WT CRT	Y109A CRT	WCL	WT CRT	Y109A	WCL	WT	Y109A	WCL	WT	Y109A			898: ALG6/UGGT1-/-
48007.2	53054.1	14687.8	50842.9	41008	22956.5	43239.1	48626.5	7154.37	47735.1	18456.6	19135			899: ALG6/UGGT2-/-
456068			483008			410772			453483					1/2 ko: AL6/UGGT1/UGGT2-/-
	% reglu			% reglu			% reglu			% reglu
	11.6329	3.22052		8.49014	4.75283		11.8379	1.74169		4.06997	4.21956
	Normalized % reglu			Normalized % reglu			Normalized % reglu			normalized
	8.41241			3.73731			10.0962			-0.149592
		percent decrease				percent decrease
		55.5738				-20.0151
													IGF-1R
	Bio Rep 2												Bio Rep 1
897			898			899			1/2 ko				897			898			899			1/2 ko
WCL	WT CRT	Y109A CRT	WCL	WT CRT	Y109A	WCL	WT	Y109A	WCL	WT	Y109A		WCL	WT CRT	Y109A CRT	WCL	WT CRT	Y109A	WCL	WT	Y109A	WCL	WT	Y109A
55481.8	34674.9	5069.35	45394.6	27322.6	12126	43681.4	38220.5	6627.23	43016.1	742.092	835.092		47212.1	46531.9	5134.57	56406.6	47870.8	9261.94	35228.8	52574.8	7041.57	41476.9	4978.76	507.678
249668			204276			196566			193572				212454			253830			158530			186646
	% reglu			%reglu			% reglu			% reglu
	13.8884	2.03043		13.3754	5.93611		19.4441	3.3715		0.383367	0.431411			% reglu			% reglu			% reglu			% reglu
	Normalized % reglu			Normalized % reglu			Normalized % reglu			Normalized				21.9021	2.41679		18.8594	3.64888		33.164	4.4418		2.66749	0.272
	11.8579			7.43926			16.0726			-0.048044				Normalized reglu			Normalized reglu			Normalized reglu			Normalized
		percent decrease				Percent decrease								19.4853			15.2105			28.7222			2.39549
		37.2635				-35.5427									percent decrease				percent decrease
															21.9383				-47.4047
	Bio Rep 3
897			898			899			1/2 ko				Bio Rep 2
WCL	WT CRT	Y109A CRT	WCL	WT CRT	Y109A	WCL	WT	Y109A	WCL	WT	Y109A		897			898			899			1/2 ko
45927.1	34708.2	14738.4	17210.8	6339.6	2868.18	16391.1	10412.1	3141.18	16301.3	7367.2	6259.55		WCL	WT CRT	Y109A CRT	WCL	WT CRT	Y109A	WCL	WT	Y109A	WCL	WT	Y109A
229635			86054			81955.4			81506.6				11611.7	17221.4	1734.23	8584.1	3989.94	1288.75	14714.1	18102.7	1633.75	5351.62	2067.23	1347.7
													58058.7			42920.5			73570.3			26758.1
	% reglu			% reglu			% reglu			% reglu				%reglu			% reglu			% reglu			% reglu
	15.1145	6.41818		7.367	3.33301		12.7046	3.8328		9.03878	7.6798			29.662	2.98704		9.29612	0.300264		24.606	2.22066		7.72564	5.0366
	Normalized			Normalized			Normalized			Normalized				Normalized reglu			Normalized			Normalized			Normalized
	8.6963			3.33301			8.87184			1.35898				26.675	percent decrease		8.99585		percent decrease	22.3853			2.68904
		percent decrease				percent decrease									66.2761				16.0813
		61.6733				-2.01853
													Bio Rep 3
	Final quants												897			898			899			1/2 ko
	avg 897 % reglu			average 898 reglu			average 899 reglu			average 1/2 ko			WCL	WT CRT	Y109A CRT	WCL	WT CRT	Y109A	WCL	WT	Y109A	WCL	WT	Y109A
	9.65555			4.83653			11.6802			0.387114			37979.1	54558.1	5944.02	31611.2	27246	5287.63	27148.6	56830.9	17660.2	43309.7	27970	8739.86
	stdev			stdev			stdev			stdev			189895			158056			135743			216549
	1.91261			2.26308			3.85286			0.843189				%reglu			% reglu			% reglu			% reglu
														28.7306	3.13016		17.2382	3.34541		41.8665	13.01		12.9162	4.03598
		p value 897 to 898			p value 897 to 899			p vaue 897 to 1/2						Normalized			Norm			Norm			Norm
		0.048			0.4607			0.0015						25.6004			13.8928			28.8565			8.88027
	9.65555	4.83653	11.6802	0.387114									avg	23.9202			12.6997			26.6547			4.65493
	1.91261	2.26308	3.85286	0.843189
													stdev	3.87818			3.27462			3.69799			1.22855
													p value to 897				0.0186			0.532			0.0009
	HexB
	Bio Rep 1
	897			898			899			1/2 ko
	WCL	WT CRT	Y109A CRT	WCL	WT CRT	Y109A	WCL	WT	Y109A	WCL	WT	Y109A
	22128.6	38165.6	1913.63	22898.4	37928.5	2428.92	36420.9	29860.5	0	11135.1	494.82	0
	110643			114492			182105			55675.6
		% reglu			% reglu			% reglu			% reglu
		34.4943	1.72955		33.1276	2.12147		16.3975			0.888755
	normalized	32.7648		normalized	31.0062		normalized	16.3975
	Bio Rep 2
	897			898			899			1/2 ko
	WCL	WT CRT	Y109A CRT	WCL	WT CRT	Y109A	WCL	WT	Y109A	WCL	WT	Y109A
	21597.9	53468.8	4554.6	12310.2	45197.6	4517.46	44771.8	50195		25975.4	0	0
	107989			61550.8			223859			129877					ENPP1
		% reglu			% reglu			% reglu			% reglu				Bio Rep 1
		49.513	4.21764		73.4314	7.3394		22.4226			0				897			898			899			1/2 ko
	norm	45.2954			66.092										WCL	WT CRT	Y109A CRT	WCL	WT CRT	Y109A	WCL	WT	Y109A	WCL	WT	Y109A
															47383.1	26139.8	4988.18	63000.8	24195.9	4604.01	52521.8	54617.1	9248.98	47371.9	8836.47	3994.03
	Bio Rep 3														236915			315004			262609			236860
	897			898			899			1/2 ko						% reglu			% reglu			% reglu			% reglu
	WCL	WT CRT	Y109A CRT	WCL	WT CRT	Y109A	WCL	WT	Y109A	WCL	WT	Y109A				11.0334	2.10547		7.68114	1.46157		20.7979	3.52196		3.73068	1.68624
	17542	25696.2		74973.7	30049.5		60602.5	50205.2	5262.38	65739.3	7754.53	10198.2			normalized	8.9279			6.21957			17.2759			2.04443
	87710.2			374868			303012			328697
		% reglu			8.016			% reglu			% reglu				Bio Rep 2
		29.2967					374868	16.5687	1.73669		2.35917	3.10261			897			898			899			1/2 ko
							8.016	14.832			-0.743436				WCL	WT CRT	Y109A CRT	WCL	WT CRT	Y109A	WCL	WT	Y109A	WCL	WT	Y109A
	Bio Rep 4														68248.3	16350.9	2826.75	51946.4	9148.44	3674.23	49539.9	17328.6	1636.38	51442.3	738.506	0
	897			898			899			1/2 ko					341242			259732			247700			257211
	WCL	WT CRT	Y109A CRT	WCL	WT CRT	Y109A	WCL	WT	Y109A	WCL	WT	Y109A				% reglu			% reglu			% reglu			% reglu
	27999.7	38245.4		20349.2	35972.9		30030.4	40461.3	2709.87	82007.8	9326.93					4.79159	0.828371		3.52226	1.41462		6.99581	0.660633		0.28712
	139999			101746			150152			410039					normalized	3.96322			2.10764			6.33518
		% reglu			% reglu			% reglu			% reglu
		27.3184			35.3556			26.9469	1.80475		2.27465				Bio Rep 3
				alpha gal 3-6				25.1421							897			898			899			1/2 ko
				34430.9	172155		48728.8	243644		41887.5	209437		44362.4	221812	WCL	WT CRT	Y109A CRT	WCL	WT CRT	Y109A	WCL	WT	Y109A	WCL	WT	Y109A
				3926.97	2.28107		5274.7	2.16492		8377.76	4.00013		898.163	0.404921	60306.9	26879.1	0	62457.1	45191.8	6919.15	65685.9	28360.1	5437.67	60198.9	2084.55	0
	897 avg % reglu			898 avg % reglu			899 avg % regu								301534			312286			328429			300994
Avg % reglu	33.6688			35.1174			19.6985			0.604991						% reglu			% reglu			% reglu			% reglu
stdev	8.0713			23.8807			5.58941			1.29776					normalized	8.91412	0		14.4713	2.21565		8.63507	1.65566		0.692555	0
				897 to 898			897 to 899			897 to 1/2						8.91412			12.2556			6.97941			0.692555
p value				0.917			0.0253			0.000191
															avg 897 % reglu			average 898 reglu			average 899 reglu			average 1/2 ko
															7.26841			6.86095			12.1277			1.00804
														stdev	2.86239			5.10432			6.13911			0.955922
															p value						p value			p value
															897 to 898						897 to 899			897 to 1/2
															0.909						0.4956			0.0226
