# Supplementary material for: Quantitative glycoproteomics reveals cellular substrate selectivity of the ER protein quality control sensors UGGT1 and UGGT2
Source: eLife. 2020 Dec 15;9:e63997. doi: 10.7554/eLife.63997 (PMC7771966; doi:10.7554/eLife.63997)
Supplement: Figure 5—source data 1. [file elife-63997-fig5-data1.xlsx]

## Sheet: Sheet1
												Source data for Figure 5A, Figure 5-figure supplement 1A
												IGF-1R
													No DNJ	Plus DNJ	No DNJ	Plus DNJ
													Bio Rep 1	Bio Rep 1	Bio Rep 2	Bio Rep 2
												pro	20557.1	32027.8	23274.5	27899.9
												mature	38293.4	30049.1	33067.8	34001.8
												% mature	65.0689	48.4062	58.6909	54.9287
																			No DNJ	Plus DNJ
													Bio Rep 3	Bio Rep 3	Bio Rep 4	Bio Rep 4		avg % mature	66.0613	53.1865
												pro	17523.8	30082.6	14890.3	31905.8
												mature	38322	36292.8	38032.7	38577.8
												% mature	68.6211	54.6781	71.8641	54.733
												HexB
													No DNJ	Plus DNJ	No DNJ	Plus DNJ
													Bio Rep 1	Bio Rep 1	Bio Rep 2	Bio Rep 2
												pro	8828.47	23270.3	11359.1	33334
												mature	24281.3	23013.3	31382.7	30212
												% mature	73.3358	49.7224	73.4239	47.5435
																			No DNJ	Plus DNJ
													Bio Rep 3	Bio Rep 3	Bio Rep 4	Bio Rep 4		ag % mature	69.7021	44.5161
												pro	13094.8	23495.8	13532.9	38295.8
												mature	31786.4	19621	21368.6	20886.4
												% mature	70.8234	45.5067	61.2254	35.2917
												Source data for Figure 5C
													IGF1R
													Bio Rep 1		Bio Rep 2		Bio Rep 2
													WT	ALG6-/-	WT	ALG6-/-	WT	ALG6-/-
												pro	6286.69	8475.93	4309.5	7795.57	6337.08	5860.96
												mature	15963.9	12828.6	15766.7	11114.5	12777.9	6999.34
												% mature	71.746	60.2154	78.5342	58.7756	66.8476	54.4259
												avg	72.376	57.8056
												stdev	5.86871	3.01414
											Source data for Figure 5E
											WT			UGGT1-/-			UGGT2-/-			UGGT1/2-/-			ALG6-/-			ALG6-/- +DNJ			WT -DNJ			WT +DNJ
											0	1	2	0	1	2	0	1	2	0	1	2	0	1	2	0	1	2	0	1	2	0	1	2
									Bio Rep 1	%mature	23.6065	51.8661	64.6047	32.2921	48.5408	47.9353	29.59	52.6023	62.9217	22.4893	36.8657	45.4983	2.4497	16.1119	24.1918	10.9554	10.4858	8.72769	18.4309	41.0357	57.0766	8.5231	8.23852	23.7586
									Bio Rep 2	% mature	18.9618	38.7949	1900-02-20 12:56:53	16.9367	36.4302	46.1325	19.3997	37.9385	50.9073	16.7624	29.0255	39.0705	12.8485	13.687	20.0351	7.67865	9.30766	13.0062	17.2421	41.5932	55.5784	4.64299	14.014	18.1409
									Bio Rep 3	% mature	16.9171	49.1148	57.6229	22.4611	31.3798	45.7845	14.9585	35.5736	50.9439	9.90355	26.4798	42.2904	8.25007	14.9604	19.4042	11.1214	9.10446	5.26786	15.7218	49.4248	63.4721	10.694	5.45533	24.3602
										avg % mature	19.8285	46.5919	57.9223	23.8966	38.7836	46.6174	21.3161	42.0382	54.9243	16.3851	30.7903	42.2864	7.84943	14.9198	21.2104	9.91849	9.63262	9.00059	17.1316	44.0179	58.709	7.95335	9.23595	22.0866
										stdev	3.42787	6.89112	6.53773	7.77768	8.81923	1.15454	7.50164	9.22495	6.92599	6.30136	5.41318	3.21393	5.21098	1.21296	2.6012	1.94153	0.745788	3.87638	1.35793	4.69082	4.1924	3.06546	4.36564	3.43028
