# Supplementary material for: Quantitative glycoproteomics reveals cellular substrate selectivity of the ER protein quality control sensors UGGT1 and UGGT2
Source: eLife. 2020 Dec 15;9:e63997. doi: 10.7554/eLife.63997 (PMC7771966; doi:10.7554/eLife.63997)
Supplement: Source data 1. [file elife-63997-data1.xlsx]

## Sheet: N-glycoproteome
N-glycome	Accesion	Alignment Start	Alignment End	Envelope Start	Envelope End	Hmm ACC	Hmm Name	Type	Hmm Start	Hmm End	Hmm Length	Bit Score	E-value	Significance	Clan	Protein_ID
1	A2VEC9	195	339	195	340	PF00094.26	VWD	Family	1	156	157	67	2.3e-18	1	No_clan	sp|A2VEC9|SSPO_HUMAN SCO-spondin OS=Homo sapiens OX=9606 GN=SSPOP PE=2 SV=2
2	A2VEC9	395	466	394	466	PF08742.12	C8	Domain	2	69	69	60.8	1.2e-16	1	No_clan	sp|A2VEC9|SSPO_HUMAN SCO-spondin OS=Homo sapiens OX=9606 GN=SSPOP PE=2 SV=2
3	A2VEC9	470	525	470	525	PF01826.18	TIL	Domain	1	55	55	38.3	1.2e-09	1	No_clan	sp|A2VEC9|SSPO_HUMAN SCO-spondin OS=Homo sapiens OX=9606 GN=SSPOP PE=2 SV=2
4	A2VEC9	565	714	565	715	PF00094.26	VWD	Family	1	156	157	85.7	3.9e-24	1	No_clan	sp|A2VEC9|SSPO_HUMAN SCO-spondin OS=Homo sapiens OX=9606 GN=SSPOP PE=2 SV=2
5	A2VEC9	760	824	759	824	PF08742.12	C8	Domain	2	69	69	61.1	1e-16	1	No_clan	sp|A2VEC9|SSPO_HUMAN SCO-spondin OS=Homo sapiens OX=9606 GN=SSPOP PE=2 SV=2
6	A2VEC9	828	881	828	881	PF01826.18	TIL	Domain	1	55	55	29.4	6.9e-07	1	No_clan	sp|A2VEC9|SSPO_HUMAN SCO-spondin OS=Homo sapiens OX=9606 GN=SSPOP PE=2 SV=2
7	A2VEC9	924	975	924	975	PF01826.18	TIL	Domain	1	55	55	24.9	1.8e-05	1	No_clan	sp|A2VEC9|SSPO_HUMAN SCO-spondin OS=Homo sapiens OX=9606 GN=SSPOP PE=2 SV=2
8	A2VEC9	1015	1163	1015	1164	PF00094.26	VWD	Family	1	156	157	111.5	4.4e-32	1	No_clan	sp|A2VEC9|SSPO_HUMAN SCO-spondin OS=Homo sapiens OX=9606 GN=SSPOP PE=2 SV=2
9	A2VEC9	1206	1272	1205	1272	PF08742.12	C8	Domain	2	69	69	59.2	4e-16	1	No_clan	sp|A2VEC9|SSPO_HUMAN SCO-spondin OS=Homo sapiens OX=9606 GN=SSPOP PE=2 SV=2
10	A2VEC9	1276	1332	1276	1332	PF01826.18	TIL	Domain	1	55	55	36.8	3.5e-09	1	No_clan	sp|A2VEC9|SSPO_HUMAN SCO-spondin OS=Homo sapiens OX=9606 GN=SSPOP PE=2 SV=2
11	A2VEC9	1376	1412	1375	1412	PF00057.19	Ldl_recept_a	Repeat	2	37	37	30.7	2.7e-07	1	No_clan	sp|A2VEC9|SSPO_HUMAN SCO-spondin OS=Homo sapiens OX=9606 GN=SSPOP PE=2 SV=2
12	A2VEC9	1417	1448	1415	1453	PF00057.19	Ldl_recept_a	Repeat	3	34	37	27.1	3.6e-06	1	No_clan	sp|A2VEC9|SSPO_HUMAN SCO-spondin OS=Homo sapiens OX=9606 GN=SSPOP PE=2 SV=2
13	A2VEC9	1453	1487	1451	1487	PF00057.19	Ldl_recept_a	Repeat	3	37	37	29.3	7.6e-07	1	No_clan	sp|A2VEC9|SSPO_HUMAN SCO-spondin OS=Homo sapiens OX=9606 GN=SSPOP PE=2 SV=2
14	A2VEC9	1492	1529	1491	1529	PF00057.19	Ldl_recept_a	Repeat	2	37	37	25.2	1.4e-05	1	No_clan	sp|A2VEC9|SSPO_HUMAN SCO-spondin OS=Homo sapiens OX=9606 GN=SSPOP PE=2 SV=2
15	A2VEC9	1565	1600	1564	1600	PF00057.19	Ldl_recept_a	Repeat	2	37	37	44.2	1.7e-11	1	No_clan	sp|A2VEC9|SSPO_HUMAN SCO-spondin OS=Homo sapiens OX=9606 GN=SSPOP PE=2 SV=2
16	A2VEC9	1699	1748	1699	1748	PF00090.20	TSP_1	Domain	1	49	49	26.1	7.2e-06	1	CL0692	sp|A2VEC9|SSPO_HUMAN SCO-spondin OS=Homo sapiens OX=9606 GN=SSPOP PE=2 SV=2
17	A2VEC9	1755	1808	1755	1808	PF00090.20	TSP_1	Domain	1	49	49	20.5	0.0004	1	CL0692	sp|A2VEC9|SSPO_HUMAN SCO-spondin OS=Homo sapiens OX=9606 GN=SSPOP PE=2 SV=2
18	A2VEC9	2081	2216	2079	2222	PF00754.26	F5_F8_type_C	Domain	3	121	127	66.2	3e-18	1	CL0202	sp|A2VEC9|SSPO_HUMAN SCO-spondin OS=Homo sapiens OX=9606 GN=SSPOP PE=2 SV=2
19	A2VEC9	2235	2269	2234	2269	PF00057.19	Ldl_recept_a	Repeat	3	37	37	28.7	1.2e-06	1	No_clan	sp|A2VEC9|SSPO_HUMAN SCO-spondin OS=Homo sapiens OX=9606 GN=SSPOP PE=2 SV=2
20	A2VEC9	2391	2426	2390	2426	PF00057.19	Ldl_recept_a	Repeat	2	37	37	30.2	3.9e-07	1	No_clan	sp|A2VEC9|SSPO_HUMAN SCO-spondin OS=Homo sapiens OX=9606 GN=SSPOP PE=2 SV=2
21	A2VEC9	2465	2499	2463	2499	PF00057.19	Ldl_recept_a	Repeat	3	37	37	34.4	1.9e-08	1	No_clan	sp|A2VEC9|SSPO_HUMAN SCO-spondin OS=Homo sapiens OX=9606 GN=SSPOP PE=2 SV=2
22	A2VEC9	2506	2553	2505	2553	PF00090.20	TSP_1	Domain	2	49	49	20.8	0.00032	1	CL0692	sp|A2VEC9|SSPO_HUMAN SCO-spondin OS=Homo sapiens OX=9606 GN=SSPOP PE=2 SV=2
23	A2VEC9	2562	2610	2560	2610	PF00090.20	TSP_1	Domain	3	49	49	43.7	2.4e-11	1	CL0692	sp|A2VEC9|SSPO_HUMAN SCO-spondin OS=Homo sapiens OX=9606 GN=SSPOP PE=2 SV=2
24	A2VEC9	2633	2676	2616	2676	PF01826.18	TIL	Domain	11	55	55	30.3	3.7e-07	1	No_clan	sp|A2VEC9|SSPO_HUMAN SCO-spondin OS=Homo sapiens OX=9606 GN=SSPOP PE=2 SV=2
25	A2VEC9	2720	2767	2720	2769	PF00090.20	TSP_1	Domain	1	46	49	30.2	3.9e-07	1	CL0692	sp|A2VEC9|SSPO_HUMAN SCO-spondin OS=Homo sapiens OX=9606 GN=SSPOP PE=2 SV=2
26	A2VEC9	2778	2828	2777	2828	PF00090.20	TSP_1	Domain	2	49	49	22.4	0.0001	1	CL0692	sp|A2VEC9|SSPO_HUMAN SCO-spondin OS=Homo sapiens OX=9606 GN=SSPOP PE=2 SV=2
27	A2VEC9	2836	2883	2835	2883	PF00090.20	TSP_1	Domain	2	49	49	41.3	1.4e-10	1	CL0692	sp|A2VEC9|SSPO_HUMAN SCO-spondin OS=Homo sapiens OX=9606 GN=SSPOP PE=2 SV=2
28	A2VEC9	2990	3040	2990	3040	PF00090.20	TSP_1	Domain	1	49	49	33	5.3e-08	1	CL0692	sp|A2VEC9|SSPO_HUMAN SCO-spondin OS=Homo sapiens OX=9606 GN=SSPOP PE=2 SV=2
29	A2VEC9	3045	3078	3045	3095	PF00090.20	TSP_1	Domain	1	34	49	25.6	1.1e-05	1	CL0692	sp|A2VEC9|SSPO_HUMAN SCO-spondin OS=Homo sapiens OX=9606 GN=SSPOP PE=2 SV=2
30	A2VEC9	3091	3143	3091	3143	PF01826.18	TIL	Domain	1	55	55	30.9	2.5e-07	1	No_clan	sp|A2VEC9|SSPO_HUMAN SCO-spondin OS=Homo sapiens OX=9606 GN=SSPOP PE=2 SV=2
31	A2VEC9	3188	3235	3188	3250	PF00090.20	TSP_1	Domain	1	44	49	15.2	0.018	1	CL0692	sp|A2VEC9|SSPO_HUMAN SCO-spondin OS=Homo sapiens OX=9606 GN=SSPOP PE=2 SV=2
32	A2VEC9	3257	3307	3257	3307	PF00090.20	TSP_1	Domain	1	49	49	37.9	1.5e-09	1	CL0692	sp|A2VEC9|SSPO_HUMAN SCO-spondin OS=Homo sapiens OX=9606 GN=SSPOP PE=2 SV=2
33	A2VEC9	3316	3366	3312	3366	PF01826.18	TIL	Domain	3	55	55	28.9	1e-06	1	No_clan	sp|A2VEC9|SSPO_HUMAN SCO-spondin OS=Homo sapiens OX=9606 GN=SSPOP PE=2 SV=2
34	A2VEC9	3414	3467	3413	3470	PF00090.20	TSP_1	Domain	2	46	49	22.3	0.00011	1	CL0692	sp|A2VEC9|SSPO_HUMAN SCO-spondin OS=Homo sapiens OX=9606 GN=SSPOP PE=2 SV=2
35	A2VEC9	3477	3522	3477	3527	PF00090.20	TSP_1	Domain	1	45	49	21.8	0.00016	1	CL0692	sp|A2VEC9|SSPO_HUMAN SCO-spondin OS=Homo sapiens OX=9606 GN=SSPOP PE=2 SV=2
36	A2VEC9	3530	3586	3530	3586	PF01826.18	TIL	Domain	1	55	55	26.6	5.4e-06	1	No_clan	sp|A2VEC9|SSPO_HUMAN SCO-spondin OS=Homo sapiens OX=9606 GN=SSPOP PE=2 SV=2
37	A2VEC9	3650	3693	3650	3693	PF00090.20	TSP_1	Domain	1	49	49	37	2.9e-09	1	CL0692	sp|A2VEC9|SSPO_HUMAN SCO-spondin OS=Homo sapiens OX=9606 GN=SSPOP PE=2 SV=2
38	A2VEC9	3816	3867	3816	3867	PF00090.20	TSP_1	Domain	1	49	49	32.5	7.1e-08	1	CL0692	sp|A2VEC9|SSPO_HUMAN SCO-spondin OS=Homo sapiens OX=9606 GN=SSPOP PE=2 SV=2
39	A2VEC9	3953	4003	3952	4003	PF00090.20	TSP_1	Domain	2	49	49	21.8	0.00016	1	CL0692	sp|A2VEC9|SSPO_HUMAN SCO-spondin OS=Homo sapiens OX=9606 GN=SSPOP PE=2 SV=2
40	A2VEC9	4010	4060	4010	4060	PF00090.20	TSP_1	Domain	1	49	49	33.8	2.9e-08	1	CL0692	sp|A2VEC9|SSPO_HUMAN SCO-spondin OS=Homo sapiens OX=9606 GN=SSPOP PE=2 SV=2
41	A2VEC9	4064	4119	4064	4119	PF01826.18	TIL	Domain	1	55	55	32	1.1e-07	1	No_clan	sp|A2VEC9|SSPO_HUMAN SCO-spondin OS=Homo sapiens OX=9606 GN=SSPOP PE=2 SV=2
42	A2VEC9	4165	4213	4165	4213	PF00090.20	TSP_1	Domain	1	49	49	25.2	1.4e-05	1	CL0692	sp|A2VEC9|SSPO_HUMAN SCO-spondin OS=Homo sapiens OX=9606 GN=SSPOP PE=2 SV=2
43	A2VEC9	4260	4306	4259	4313	PF00090.20	TSP_1	Domain	2	44	49	34.9	1.3e-08	1	CL0692	sp|A2VEC9|SSPO_HUMAN SCO-spondin OS=Homo sapiens OX=9606 GN=SSPOP PE=2 SV=2
44	A2VEC9	4315	4364	4313	4364	PF00090.20	TSP_1	Domain	3	49	49	12.2	0.16	1	CL0692	sp|A2VEC9|SSPO_HUMAN SCO-spondin OS=Homo sapiens OX=9606 GN=SSPOP PE=2 SV=2
45	A2VEC9	4425	4480	4425	4480	PF01826.18	TIL	Domain	1	55	55	29	9.6e-07	1	No_clan	sp|A2VEC9|SSPO_HUMAN SCO-spondin OS=Homo sapiens OX=9606 GN=SSPOP PE=2 SV=2
46	A2VEC9	4621	4666	4621	4666	PF00090.20	TSP_1	Domain	1	49	49	22.8	7.8e-05	1	CL0692	sp|A2VEC9|SSPO_HUMAN SCO-spondin OS=Homo sapiens OX=9606 GN=SSPOP PE=2 SV=2
47	A2VEC9	4680	4726	4672	4726	PF01826.18	TIL	Domain	9	55	55	32.5	7.5e-08	1	No_clan	sp|A2VEC9|SSPO_HUMAN SCO-spondin OS=Homo sapiens OX=9606 GN=SSPOP PE=2 SV=2
48	A2VEC9	4770	4818	4770	4818	PF00090.20	TSP_1	Domain	1	49	49	36.8	3.4e-09	1	CL0692	sp|A2VEC9|SSPO_HUMAN SCO-spondin OS=Homo sapiens OX=9606 GN=SSPOP PE=2 SV=2
49	A2VEC9	4821	4875	4821	4875	PF01826.18	TIL	Domain	1	55	55	32.8	6e-08	1	No_clan	sp|A2VEC9|SSPO_HUMAN SCO-spondin OS=Homo sapiens OX=9606 GN=SSPOP PE=2 SV=2
50	Q9Y6R7	131	419	129	419	PF17517.3	IgGFc_binding	Family	3	294	294	193.3	5.5e-57	1	No_clan	sp|Q9Y6R7|FCGBP_HUMAN IgGFc-binding protein OS=Homo sapiens OX=9606 GN=FCGBP PE=1 SV=3
51	Q9Y6R7	472	627	472	628	PF00094.26	VWD	Family	1	156	157	134.5	3.9e-39	1	No_clan	sp|Q9Y6R7|FCGBP_HUMAN IgGFc-binding protein OS=Homo sapiens OX=9606 GN=FCGBP PE=1 SV=3
52	Q9Y6R7	674	741	673	741	PF08742.12	C8	Domain	2	69	69	68.8	4e-19	1	No_clan	sp|Q9Y6R7|FCGBP_HUMAN IgGFc-binding protein OS=Homo sapiens OX=9606 GN=FCGBP PE=1 SV=3
53	Q9Y6R7	745	799	745	799	PF01826.18	TIL	Domain	1	55	55	43.3	3.2e-11	1	No_clan	sp|Q9Y6R7|FCGBP_HUMAN IgGFc-binding protein OS=Homo sapiens OX=9606 GN=FCGBP PE=1 SV=3
54	Q9Y6R7	864	1018	864	1020	PF00094.26	VWD	Family	1	155	157	115	3.9e-33	1	No_clan	sp|Q9Y6R7|FCGBP_HUMAN IgGFc-binding protein OS=Homo sapiens OX=9606 GN=FCGBP PE=1 SV=3
55	Q9Y6R7	1065	1132	1064	1132	PF08742.12	C8	Domain	2	69	69	68.4	5.3e-19	1	No_clan	sp|Q9Y6R7|FCGBP_HUMAN IgGFc-binding protein OS=Homo sapiens OX=9606 GN=FCGBP PE=1 SV=3
56	Q9Y6R7	1136	1189	1136	1189	PF01826.18	TIL	Domain	1	55	55	40.1	3.2e-10	1	No_clan	sp|Q9Y6R7|FCGBP_HUMAN IgGFc-binding protein OS=Homo sapiens OX=9606 GN=FCGBP PE=1 SV=3
57	Q9Y6R7	1190	1244	1190	1245	PF12714.8	TILa	Domain	1	54	55	35.4	8e-09	1	CL0451	sp|Q9Y6R7|FCGBP_HUMAN IgGFc-binding protein OS=Homo sapiens OX=9606 GN=FCGBP PE=1 SV=3
58	Q9Y6R7	1252	1406	1252	1407	PF00094.26	VWD	Family	1	156	157	127.5	5.3e-37	1	No_clan	sp|Q9Y6R7|FCGBP_HUMAN IgGFc-binding protein OS=Homo sapiens OX=9606 GN=FCGBP PE=1 SV=3
59	Q9Y6R7	1461	1528	1460	1528	PF08742.12	C8	Domain	2	69	69	65.1	5.5e-18	1	No_clan	sp|Q9Y6R7|FCGBP_HUMAN IgGFc-binding protein OS=Homo sapiens OX=9606 GN=FCGBP PE=1 SV=3
60	Q9Y6R7	1532	1585	1532	1585	PF01826.18	TIL	Domain	1	55	55	40.5	2.5e-10	1	No_clan	sp|Q9Y6R7|FCGBP_HUMAN IgGFc-binding protein OS=Homo sapiens OX=9606 GN=FCGBP PE=1 SV=3
61	Q9Y6R7	1586	1639	1584	1640	PF12714.8	TILa	Domain	1	54	55	29.8	4.2e-07	1	CL0451	sp|Q9Y6R7|FCGBP_HUMAN IgGFc-binding protein OS=Homo sapiens OX=9606 GN=FCGBP PE=1 SV=3
62	Q9Y6R7	1673	1832	1673	1832	PF00094.26	VWD	Family	1	157	157	113.9	8.3e-33	1	No_clan	sp|Q9Y6R7|FCGBP_HUMAN IgGFc-binding protein OS=Homo sapiens OX=9606 GN=FCGBP PE=1 SV=3
63	Q9Y6R7	1885	1946	1877	1946	PF08742.12	C8	Domain	8	69	69	66.5	2.1e-18	1	No_clan	sp|Q9Y6R7|FCGBP_HUMAN IgGFc-binding protein OS=Homo sapiens OX=9606 GN=FCGBP PE=1 SV=3
64	Q9Y6R7	1950	2004	1950	2007	PF01826.18	TIL	Domain	1	53	55	39.3	5.9e-10	1	No_clan	sp|Q9Y6R7|FCGBP_HUMAN IgGFc-binding protein OS=Homo sapiens OX=9606 GN=FCGBP PE=1 SV=3
65	Q9Y6R7	2008	2065	2008	2065	PF12714.8	TILa	Domain	1	55	55	27.2	2.7e-06	1	CL0451	sp|Q9Y6R7|FCGBP_HUMAN IgGFc-binding protein OS=Homo sapiens OX=9606 GN=FCGBP PE=1 SV=3
66	Q9Y6R7	2072	2222	2072	2228	PF00094.26	VWD	Family	1	151	157	110.6	8.5e-32	1	No_clan	sp|Q9Y6R7|FCGBP_HUMAN IgGFc-binding protein OS=Homo sapiens OX=9606 GN=FCGBP PE=1 SV=3
67	Q9Y6R7	2266	2333	2265	2333	PF08742.12	C8	Domain	2	69	69	63.3	2.1e-17	1	No_clan	sp|Q9Y6R7|FCGBP_HUMAN IgGFc-binding protein OS=Homo sapiens OX=9606 GN=FCGBP PE=1 SV=3
68	Q9Y6R7	2337	2390	2337	2390	PF01826.18	TIL	Domain	1	55	55	44.8	1.1e-11	1	No_clan	sp|Q9Y6R7|FCGBP_HUMAN IgGFc-binding protein OS=Homo sapiens OX=9606 GN=FCGBP PE=1 SV=3
69	Q9Y6R7	2391	2445	2391	2446	PF12714.8	TILa	Domain	1	54	55	36.2	4.3e-09	1	CL0451	sp|Q9Y6R7|FCGBP_HUMAN IgGFc-binding protein OS=Homo sapiens OX=9606 GN=FCGBP PE=1 SV=3
70	Q9Y6R7	2453	2607	2453	2608	PF00094.26	VWD	Family	1	156	157	124.7	3.9e-36	1	No_clan	sp|Q9Y6R7|FCGBP_HUMAN IgGFc-binding protein OS=Homo sapiens OX=9606 GN=FCGBP PE=1 SV=3
71	Q9Y6R7	2662	2729	2661	2729	PF08742.12	C8	Domain	2	69	69	65.5	4.4e-18	1	No_clan	sp|Q9Y6R7|FCGBP_HUMAN IgGFc-binding protein OS=Homo sapiens OX=9606 GN=FCGBP PE=1 SV=3
72	Q9Y6R7	2733	2786	2733	2786	PF01826.18	TIL	Domain	1	55	55	40.7	2.1e-10	1	No_clan	sp|Q9Y6R7|FCGBP_HUMAN IgGFc-binding protein OS=Homo sapiens OX=9606 GN=FCGBP PE=1 SV=3
73	Q9Y6R7	2787	2840	2786	2841	PF12714.8	TILa	Domain	1	54	55	32.8	5e-08	1	CL0451	sp|Q9Y6R7|FCGBP_HUMAN IgGFc-binding protein OS=Homo sapiens OX=9606 GN=FCGBP PE=1 SV=3
74	Q9Y6R7	2874	3033	2874	3033	PF00094.26	VWD	Family	1	157	157	113.9	8.3e-33	1	No_clan	sp|Q9Y6R7|FCGBP_HUMAN IgGFc-binding protein OS=Homo sapiens OX=9606 GN=FCGBP PE=1 SV=3
75	Q9Y6R7	3086	3147	3078	3147	PF08742.12	C8	Domain	8	69	69	66.5	2.1e-18	1	No_clan	sp|Q9Y6R7|FCGBP_HUMAN IgGFc-binding protein OS=Homo sapiens OX=9606 GN=FCGBP PE=1 SV=3
76	Q9Y6R7	3151	3205	3151	3208	PF01826.18	TIL	Domain	1	53	55	38.9	7.8e-10	1	No_clan	sp|Q9Y6R7|FCGBP_HUMAN IgGFc-binding protein OS=Homo sapiens OX=9606 GN=FCGBP PE=1 SV=3
77	Q9Y6R7	3209	3266	3209	3266	PF12714.8	TILa	Domain	1	55	55	27.2	2.7e-06	1	CL0451	sp|Q9Y6R7|FCGBP_HUMAN IgGFc-binding protein OS=Homo sapiens OX=9606 GN=FCGBP PE=1 SV=3
78	Q9Y6R7	3273	3423	3273	3429	PF00094.26	VWD	Family	1	151	157	110.2	1.1e-31	1	No_clan	sp|Q9Y6R7|FCGBP_HUMAN IgGFc-binding protein OS=Homo sapiens OX=9606 GN=FCGBP PE=1 SV=3
79	Q9Y6R7	3467	3534	3466	3534	PF08742.12	C8	Domain	2	69	69	63.3	2.1e-17	1	No_clan	sp|Q9Y6R7|FCGBP_HUMAN IgGFc-binding protein OS=Homo sapiens OX=9606 GN=FCGBP PE=1 SV=3
80	Q9Y6R7	3538	3591	3538	3591	PF01826.18	TIL	Domain	1	55	55	44.8	1.1e-11	1	No_clan	sp|Q9Y6R7|FCGBP_HUMAN IgGFc-binding protein OS=Homo sapiens OX=9606 GN=FCGBP PE=1 SV=3
81	Q9Y6R7	3592	3646	3592	3647	PF12714.8	TILa	Domain	1	54	55	36.2	4.3e-09	1	CL0451	sp|Q9Y6R7|FCGBP_HUMAN IgGFc-binding protein OS=Homo sapiens OX=9606 GN=FCGBP PE=1 SV=3
82	Q9Y6R7	3654	3808	3654	3809	PF00094.26	VWD	Family	1	156	157	124.2	5.6e-36	1	No_clan	sp|Q9Y6R7|FCGBP_HUMAN IgGFc-binding protein OS=Homo sapiens OX=9606 GN=FCGBP PE=1 SV=3
83	Q9Y6R7	3863	3930	3862	3930	PF08742.12	C8	Domain	2	69	69	65.1	5.6e-18	1	No_clan	sp|Q9Y6R7|FCGBP_HUMAN IgGFc-binding protein OS=Homo sapiens OX=9606 GN=FCGBP PE=1 SV=3
84	Q9Y6R7	3934	3987	3934	3987	PF01826.18	TIL	Domain	1	55	55	40.7	2.1e-10	1	No_clan	sp|Q9Y6R7|FCGBP_HUMAN IgGFc-binding protein OS=Homo sapiens OX=9606 GN=FCGBP PE=1 SV=3
85	Q9Y6R7	3988	4041	3987	4042	PF12714.8	TILa	Domain	1	54	55	32.6	5.8e-08	1	CL0451	sp|Q9Y6R7|FCGBP_HUMAN IgGFc-binding protein OS=Homo sapiens OX=9606 GN=FCGBP PE=1 SV=3
86	Q9Y6R7	4075	4234	4075	4234	PF00094.26	VWD	Family	1	157	157	113.1	1.5e-32	1	No_clan	sp|Q9Y6R7|FCGBP_HUMAN IgGFc-binding protein OS=Homo sapiens OX=9606 GN=FCGBP PE=1 SV=3
87	Q9Y6R7	4280	4348	4279	4348	PF08742.12	C8	Domain	2	69	69	67.9	7.5e-19	1	No_clan	sp|Q9Y6R7|FCGBP_HUMAN IgGFc-binding protein OS=Homo sapiens OX=9606 GN=FCGBP PE=1 SV=3
88	Q9Y6R7	4352	4406	4352	4409	PF01826.18	TIL	Domain	1	53	55	38.9	7.8e-10	1	No_clan	sp|Q9Y6R7|FCGBP_HUMAN IgGFc-binding protein OS=Homo sapiens OX=9606 GN=FCGBP PE=1 SV=3
89	Q9Y6R7	4410	4467	4410	4467	PF12714.8	TILa	Domain	1	55	55	27.2	2.7e-06	1	CL0451	sp|Q9Y6R7|FCGBP_HUMAN IgGFc-binding protein OS=Homo sapiens OX=9606 GN=FCGBP PE=1 SV=3
90	Q9Y6R7	4474	4624	4474	4630	PF00094.26	VWD	Family	1	151	157	106.5	1.6e-30	1	No_clan	sp|Q9Y6R7|FCGBP_HUMAN IgGFc-binding protein OS=Homo sapiens OX=9606 GN=FCGBP PE=1 SV=3
91	Q9Y6R7	4668	4735	4667	4735	PF08742.12	C8	Domain	2	69	69	63.4	1.9e-17	1	No_clan	sp|Q9Y6R7|FCGBP_HUMAN IgGFc-binding protein OS=Homo sapiens OX=9606 GN=FCGBP PE=1 SV=3
92	Q9Y6R7	4739	4792	4739	4792	PF01826.18	TIL	Domain	1	55	55	44.4	1.4e-11	1	No_clan	sp|Q9Y6R7|FCGBP_HUMAN IgGFc-binding protein OS=Homo sapiens OX=9606 GN=FCGBP PE=1 SV=3
93	Q9Y6R7	4793	4849	4793	4849	PF12714.8	TILa	Domain	1	55	55	35.6	6.6e-09	1	CL0451	sp|Q9Y6R7|FCGBP_HUMAN IgGFc-binding protein OS=Homo sapiens OX=9606 GN=FCGBP PE=1 SV=3
94	Q9Y6R7	4856	5002	4856	5003	PF00094.26	VWD	Family	1	156	157	95.6	3.6e-27	1	No_clan	sp|Q9Y6R7|FCGBP_HUMAN IgGFc-binding protein OS=Homo sapiens OX=9606 GN=FCGBP PE=1 SV=3
95	Q9Y6R7	5050	5117	5049	5117	PF08742.12	C8	Domain	2	69	69	72.9	2.2e-20	1	No_clan	sp|Q9Y6R7|FCGBP_HUMAN IgGFc-binding protein OS=Homo sapiens OX=9606 GN=FCGBP PE=1 SV=3
96	Q9Y6R7	5121	5174	5121	5174	PF01826.18	TIL	Domain	1	55	55	34.9	1.4e-08	1	No_clan	sp|Q9Y6R7|FCGBP_HUMAN IgGFc-binding protein OS=Homo sapiens OX=9606 GN=FCGBP PE=1 SV=3
97	Q9Y6R7	5175	5228	5175	5229	PF12714.8	TILa	Domain	1	54	55	37.6	1.6e-09	1	CL0451	sp|Q9Y6R7|FCGBP_HUMAN IgGFc-binding protein OS=Homo sapiens OX=9606 GN=FCGBP PE=1 SV=3
98	Q9Y6R7	5235	5385	5235	5389	PF00094.26	VWD	Family	1	153	157	51.9	1e-13	1	No_clan	sp|Q9Y6R7|FCGBP_HUMAN IgGFc-binding protein OS=Homo sapiens OX=9606 GN=FCGBP PE=1 SV=3
99	P35556	76	112	76	112	PF18193.2	Fibrillin_U_N	Domain	1	37	37	90.3	5.4e-26	1	CL0001	sp|P35556|FBN2_HUMAN Fibrillin-2 OS=Homo sapiens OX=9606 GN=FBN2 PE=1 SV=3
100	P35556	224	259	224	265	PF00683.18	TB	Family	1	35	45	31.2	1.4e-07	1	No_clan	sp|P35556|FBN2_HUMAN Fibrillin-2 OS=Homo sapiens OX=9606 GN=FBN2 PE=1 SV=3
101	P35556	276	316	276	316	PF07645.16	EGF_CA	Domain	1	42	42	36.3	4.7e-09	1	CL0001	sp|P35556|FBN2_HUMAN Fibrillin-2 OS=Homo sapiens OX=9606 GN=FBN2 PE=1 SV=3
102	P35556	318	358	318	358	PF07645.16	EGF_CA	Domain	1	42	42	37.2	2.5e-09	1	CL0001	sp|P35556|FBN2_HUMAN Fibrillin-2 OS=Homo sapiens OX=9606 GN=FBN2 PE=1 SV=3
103	P35556	374	420	374	420	PF00683.18	TB	Family	1	45	45	55.1	4.7e-15	1	No_clan	sp|P35556|FBN2_HUMAN Fibrillin-2 OS=Homo sapiens OX=9606 GN=FBN2 PE=1 SV=3
104	P35556	505	525	505	525	PF12661.8	hEGF	Domain	1	22	22	18.5	0.0024	1	CL0001	sp|P35556|FBN2_HUMAN Fibrillin-2 OS=Homo sapiens OX=9606 GN=FBN2 PE=1 SV=3
105	P35556	535	573	535	573	PF07645.16	EGF_CA	Domain	1	42	42	29.7	5.7e-07	1	CL0001	sp|P35556|FBN2_HUMAN Fibrillin-2 OS=Homo sapiens OX=9606 GN=FBN2 PE=1 SV=3
106	P35556	575	615	575	615	PF07645.16	EGF_CA	Domain	1	42	42	36.6	3.8e-09	1	CL0001	sp|P35556|FBN2_HUMAN Fibrillin-2 OS=Homo sapiens OX=9606 GN=FBN2 PE=1 SV=3
107	P35556	638	661	638	661	PF12662.8	cEGF	Domain	1	24	24	35	1e-08	1	CL0001	sp|P35556|FBN2_HUMAN Fibrillin-2 OS=Homo sapiens OX=9606 GN=FBN2 PE=1 SV=3
108	P35556	668	687	668	687	PF12661.8	hEGF	Domain	1	21	22	14.5	0.042	1	CL0001	sp|P35556|FBN2_HUMAN Fibrillin-2 OS=Homo sapiens OX=9606 GN=FBN2 PE=1 SV=3
109	P35556	715	759	714	759	PF00683.18	TB	Family	2	45	45	48.1	7.2e-13	1	No_clan	sp|P35556|FBN2_HUMAN Fibrillin-2 OS=Homo sapiens OX=9606 GN=FBN2 PE=1 SV=3
110	P35556	768	808	768	808	PF07645.16	EGF_CA	Domain	1	42	42	36.2	5.1e-09	1	CL0001	sp|P35556|FBN2_HUMAN Fibrillin-2 OS=Homo sapiens OX=9606 GN=FBN2 PE=1 SV=3
111	P35556	810	850	810	850	PF07645.16	EGF_CA	Domain	1	42	42	34.6	1.7e-08	1	CL0001	sp|P35556|FBN2_HUMAN Fibrillin-2 OS=Homo sapiens OX=9606 GN=FBN2 PE=1 SV=3
112	P35556	852	882	852	890	PF07645.16	EGF_CA	Domain	1	34	42	23.6	4.5e-05	1	CL0001	sp|P35556|FBN2_HUMAN Fibrillin-2 OS=Homo sapiens OX=9606 GN=FBN2 PE=1 SV=3
113	P35556	906	937	906	943	PF00683.18	TB	Family	1	32	45	30.6	2.1e-07	1	No_clan	sp|P35556|FBN2_HUMAN Fibrillin-2 OS=Homo sapiens OX=9606 GN=FBN2 PE=1 SV=3
114	P35556	955	993	955	995	PF07645.16	EGF_CA	Domain	1	40	42	31.7	1.3e-07	1	CL0001	sp|P35556|FBN2_HUMAN Fibrillin-2 OS=Homo sapiens OX=9606 GN=FBN2 PE=1 SV=3
115	P35556	1011	1055	1011	1055	PF00683.18	TB	Family	1	45	45	55.7	3.2e-15	1	No_clan	sp|P35556|FBN2_HUMAN Fibrillin-2 OS=Homo sapiens OX=9606 GN=FBN2 PE=1 SV=3
116	P35556	1073	1113	1073	1113	PF07645.16	EGF_CA	Domain	1	42	42	33.9	2.6e-08	1	CL0001	sp|P35556|FBN2_HUMAN Fibrillin-2 OS=Homo sapiens OX=9606 GN=FBN2 PE=1 SV=3
117	P35556	1115	1148	1115	1156	PF07645.16	EGF_CA	Domain	1	35	42	32.7	6.4e-08	1	CL0001	sp|P35556|FBN2_HUMAN Fibrillin-2 OS=Homo sapiens OX=9606 GN=FBN2 PE=1 SV=3
118	P35556	1158	1198	1158	1198	PF07645.16	EGF_CA	Domain	1	42	42	32.9	5.4e-08	1	CL0001	sp|P35556|FBN2_HUMAN Fibrillin-2 OS=Homo sapiens OX=9606 GN=FBN2 PE=1 SV=3
119	P35556	1200	1240	1200	1240	PF07645.16	EGF_CA	Domain	1	42	42	35.7	7.5e-09	1	CL0001	sp|P35556|FBN2_HUMAN Fibrillin-2 OS=Homo sapiens OX=9606 GN=FBN2 PE=1 SV=3
120	P35556	1263	1286	1263	1286	PF12662.8	cEGF	Domain	1	24	24	38.4	8.4e-10	1	CL0001	sp|P35556|FBN2_HUMAN Fibrillin-2 OS=Homo sapiens OX=9606 GN=FBN2 PE=1 SV=3
121	P35556	1325	1365	1325	1365	PF07645.16	EGF_CA	Domain	1	42	42	29.3	7.5e-07	1	CL0001	sp|P35556|FBN2_HUMAN Fibrillin-2 OS=Homo sapiens OX=9606 GN=FBN2 PE=1 SV=3
122	P35556	1367	1400	1367	1406	PF07645.16	EGF_CA	Domain	1	34	42	41.9	8.5e-11	1	CL0001	sp|P35556|FBN2_HUMAN Fibrillin-2 OS=Homo sapiens OX=9606 GN=FBN2 PE=1 SV=3
123	P35556	1408	1447	1408	1447	PF07645.16	EGF_CA	Domain	1	42	42	39.1	6.5e-10	1	CL0001	sp|P35556|FBN2_HUMAN Fibrillin-2 OS=Homo sapiens OX=9606 GN=FBN2 PE=1 SV=3
124	P35556	1449	1489	1449	1489	PF07645.16	EGF_CA	Domain	1	42	42	30.3	3.6e-07	1	CL0001	sp|P35556|FBN2_HUMAN Fibrillin-2 OS=Homo sapiens OX=9606 GN=FBN2 PE=1 SV=3
125	P35556	1491	1530	1491	1530	PF07645.16	EGF_CA	Domain	1	42	42	22.6	9.3e-05	1	CL0001	sp|P35556|FBN2_HUMAN Fibrillin-2 OS=Homo sapiens OX=9606 GN=FBN2 PE=1 SV=3
126	P35556	1532	1571	1532	1572	PF07645.16	EGF_CA	Domain	1	42	42	26.6	5e-06	1	CL0001	sp|P35556|FBN2_HUMAN Fibrillin-2 OS=Homo sapiens OX=9606 GN=FBN2 PE=1 SV=3
127	P35556	1593	1636	1592	1636	PF00683.18	TB	Family	2	45	45	52.2	3.9e-14	1	No_clan	sp|P35556|FBN2_HUMAN Fibrillin-2 OS=Homo sapiens OX=9606 GN=FBN2 PE=1 SV=3
128	P35556	1650	1688	1650	1690	PF07645.16	EGF_CA	Domain	1	40	42	35	1.2e-08	1	CL0001	sp|P35556|FBN2_HUMAN Fibrillin-2 OS=Homo sapiens OX=9606 GN=FBN2 PE=1 SV=3
129	P35556	1692	1732	1692	1732	PF07645.16	EGF_CA	Domain	1	42	42	23.8	3.8e-05	1	CL0001	sp|P35556|FBN2_HUMAN Fibrillin-2 OS=Homo sapiens OX=9606 GN=FBN2 PE=1 SV=3
130	P35556	1748	1792	1748	1794	PF00683.18	TB	Family	1	43	45	57.3	9.4e-16	1	No_clan	sp|P35556|FBN2_HUMAN Fibrillin-2 OS=Homo sapiens OX=9606 GN=FBN2 PE=1 SV=3
131	P35556	1808	1843	1808	1848	PF07645.16	EGF_CA	Domain	1	37	42	37.8	1.6e-09	1	CL0001	sp|P35556|FBN2_HUMAN Fibrillin-2 OS=Homo sapiens OX=9606 GN=FBN2 PE=1 SV=3
132	P35556	1850	1887	1850	1890	PF07645.16	EGF_CA	Domain	1	39	42	37.7	1.8e-09	1	CL0001	sp|P35556|FBN2_HUMAN Fibrillin-2 OS=Homo sapiens OX=9606 GN=FBN2 PE=1 SV=3
133	P35556	1892	1932	1892	1932	PF07645.16	EGF_CA	Domain	1	42	42	29.2	7.8e-07	1	CL0001	sp|P35556|FBN2_HUMAN Fibrillin-2 OS=Homo sapiens OX=9606 GN=FBN2 PE=1 SV=3
134	P35556	1934	1970	1934	1971	PF07645.16	EGF_CA	Domain	1	41	42	27.5	2.8e-06	1	CL0001	sp|P35556|FBN2_HUMAN Fibrillin-2 OS=Homo sapiens OX=9606 GN=FBN2 PE=1 SV=3
135	P35556	1973	2014	1973	2014	PF07645.16	EGF_CA	Domain	1	42	42	36.2	5e-09	1	CL0001	sp|P35556|FBN2_HUMAN Fibrillin-2 OS=Homo sapiens OX=9606 GN=FBN2 PE=1 SV=3
136	P35556	2016	2054	2016	2054	PF07645.16	EGF_CA	Domain	1	42	42	32.9	5.5e-08	1	CL0001	sp|P35556|FBN2_HUMAN Fibrillin-2 OS=Homo sapiens OX=9606 GN=FBN2 PE=1 SV=3
137	P35556	2056	2096	2056	2096	PF07645.16	EGF_CA	Domain	1	42	42	32.7	6.5e-08	1	CL0001	sp|P35556|FBN2_HUMAN Fibrillin-2 OS=Homo sapiens OX=9606 GN=FBN2 PE=1 SV=3
138	P35556	2112	2157	2112	2158	PF00683.18	TB	Family	1	44	45	51.3	7.1e-14	1	No_clan	sp|P35556|FBN2_HUMAN Fibrillin-2 OS=Homo sapiens OX=9606 GN=FBN2 PE=1 SV=3
139	P35556	2171	2206	2171	2211	PF07645.16	EGF_CA	Domain	1	37	42	34.2	2.1e-08	1	CL0001	sp|P35556|FBN2_HUMAN Fibrillin-2 OS=Homo sapiens OX=9606 GN=FBN2 PE=1 SV=3
140	P35556	2213	2247	2213	2251	PF07645.16	EGF_CA	Domain	1	37	42	26.1	7.3e-06	1	CL0001	sp|P35556|FBN2_HUMAN Fibrillin-2 OS=Homo sapiens OX=9606 GN=FBN2 PE=1 SV=3
141	P35556	2253	2292	2253	2292	PF07645.16	EGF_CA	Domain	1	42	42	33.3	4.2e-08	1	CL0001	sp|P35556|FBN2_HUMAN Fibrillin-2 OS=Homo sapiens OX=9606 GN=FBN2 PE=1 SV=3
142	P35556	2294	2336	2294	2336	PF07645.16	EGF_CA	Domain	1	42	42	36.8	3.4e-09	1	CL0001	sp|P35556|FBN2_HUMAN Fibrillin-2 OS=Homo sapiens OX=9606 GN=FBN2 PE=1 SV=3
143	P35556	2338	2378	2338	2378	PF07645.16	EGF_CA	Domain	1	42	42	30.4	3.2e-07	1	CL0001	sp|P35556|FBN2_HUMAN Fibrillin-2 OS=Homo sapiens OX=9606 GN=FBN2 PE=1 SV=3
144	P35556	2398	2440	2395	2440	PF00683.18	TB	Family	3	45	45	56.8	1.4e-15	1	No_clan	sp|P35556|FBN2_HUMAN Fibrillin-2 OS=Homo sapiens OX=9606 GN=FBN2 PE=1 SV=3
145	P35556	2449	2489	2449	2489	PF07645.16	EGF_CA	Domain	1	42	42	36.8	3.3e-09	1	CL0001	sp|P35556|FBN2_HUMAN Fibrillin-2 OS=Homo sapiens OX=9606 GN=FBN2 PE=1 SV=3
146	P35556	2491	2530	2491	2530	PF07645.16	EGF_CA	Domain	1	42	42	37.1	2.8e-09	1	CL0001	sp|P35556|FBN2_HUMAN Fibrillin-2 OS=Homo sapiens OX=9606 GN=FBN2 PE=1 SV=3
147	P35556	2532	2569	2532	2569	PF07645.16	EGF_CA	Domain	1	42	42	37.4	2.2e-09	1	CL0001	sp|P35556|FBN2_HUMAN Fibrillin-2 OS=Homo sapiens OX=9606 GN=FBN2 PE=1 SV=3
148	P35556	2571	2612	2571	2612	PF07645.16	EGF_CA	Domain	1	42	42	30.7	2.7e-07	1	CL0001	sp|P35556|FBN2_HUMAN Fibrillin-2 OS=Homo sapiens OX=9606 GN=FBN2 PE=1 SV=3
149	P35556	2614	2652	2614	2652	PF07645.16	EGF_CA	Domain	1	42	42	23.9	3.6e-05	1	CL0001	sp|P35556|FBN2_HUMAN Fibrillin-2 OS=Homo sapiens OX=9606 GN=FBN2 PE=1 SV=3
150	P35556	2654	2693	2654	2693	PF07645.16	EGF_CA	Domain	1	42	42	22.5	9.8e-05	1	CL0001	sp|P35556|FBN2_HUMAN Fibrillin-2 OS=Homo sapiens OX=9606 GN=FBN2 PE=1 SV=3
151	P35556	2695	2729	2695	2733	PF07645.16	EGF_CA	Domain	1	38	42	24.3	2.6e-05	1	CL0001	sp|P35556|FBN2_HUMAN Fibrillin-2 OS=Homo sapiens OX=9606 GN=FBN2 PE=1 SV=3
152	P35555	48	82	44	82	PF18193.2	Fibrillin_U_N	Domain	3	37	37	75.6	2.1e-21	1	CL0001	sp|P35555|FBN1_HUMAN Fibrillin-1 OS=Homo sapiens OX=9606 GN=FBN1 PE=1 SV=4
153	P35555	194	228	194	234	PF00683.18	TB	Family	1	34	45	31.1	1.5e-07	1	No_clan	sp|P35555|FBN1_HUMAN Fibrillin-1 OS=Homo sapiens OX=9606 GN=FBN1 PE=1 SV=4
154	P35555	246	286	246	286	PF07645.16	EGF_CA	Domain	1	42	42	37.3	2.3e-09	1	CL0001	sp|P35555|FBN1_HUMAN Fibrillin-1 OS=Homo sapiens OX=9606 GN=FBN1 PE=1 SV=4
155	P35555	288	328	288	328	PF07645.16	EGF_CA	Domain	1	42	42	29.7	5.4e-07	1	CL0001	sp|P35555|FBN1_HUMAN Fibrillin-1 OS=Homo sapiens OX=9606 GN=FBN1 PE=1 SV=4
156	P35555	344	390	344	392	PF00683.18	TB	Family	1	43	45	52.8	2.4e-14	1	No_clan	sp|P35555|FBN1_HUMAN Fibrillin-1 OS=Homo sapiens OX=9606 GN=FBN1 PE=1 SV=4
157	P35555	451	485	450	488	PF07645.16	EGF_CA	Domain	3	39	42	16.8	0.0061	1	CL0001	sp|P35555|FBN1_HUMAN Fibrillin-1 OS=Homo sapiens OX=9606 GN=FBN1 PE=1 SV=4
158	P35555	490	528	490	528	PF07645.16	EGF_CA	Domain	1	42	42	32.3	8.6e-08	1	CL0001	sp|P35555|FBN1_HUMAN Fibrillin-1 OS=Homo sapiens OX=9606 GN=FBN1 PE=1 SV=4
159	P35555	530	570	530	570	PF07645.16	EGF_CA	Domain	1	42	42	36.9	3.2e-09	1	CL0001	sp|P35555|FBN1_HUMAN Fibrillin-1 OS=Homo sapiens OX=9606 GN=FBN1 PE=1 SV=4
160	P35555	593	616	593	616	PF12662.8	cEGF	Domain	1	24	24	35.6	6.6e-09	1	CL0001	sp|P35555|FBN1_HUMAN Fibrillin-1 OS=Homo sapiens OX=9606 GN=FBN1 PE=1 SV=4
161	P35555	669	714	669	714	PF00683.18	TB	Family	1	45	45	50.6	1.2e-13	1	No_clan	sp|P35555|FBN1_HUMAN Fibrillin-1 OS=Homo sapiens OX=9606 GN=FBN1 PE=1 SV=4
162	P35555	723	763	723	763	PF07645.16	EGF_CA	Domain	1	42	42	36.3	4.6e-09	1	CL0001	sp|P35555|FBN1_HUMAN Fibrillin-1 OS=Homo sapiens OX=9606 GN=FBN1 PE=1 SV=4
163	P35555	765	805	765	805	PF07645.16	EGF_CA	Domain	1	42	42	31.7	1.4e-07	1	CL0001	sp|P35555|FBN1_HUMAN Fibrillin-1 OS=Homo sapiens OX=9606 GN=FBN1 PE=1 SV=4
164	P35555	807	843	807	845	PF07645.16	EGF_CA	Domain	1	40	42	19.1	0.0012	1	CL0001	sp|P35555|FBN1_HUMAN Fibrillin-1 OS=Homo sapiens OX=9606 GN=FBN1 PE=1 SV=4
165	P35555	861	892	861	896	PF00683.18	TB	Family	1	32	45	27.5	1.9e-06	1	No_clan	sp|P35555|FBN1_HUMAN Fibrillin-1 OS=Homo sapiens OX=9606 GN=FBN1 PE=1 SV=4
166	P35555	910	943	910	950	PF07645.16	EGF_CA	Domain	1	35	42	33.8	3e-08	1	CL0001	sp|P35555|FBN1_HUMAN Fibrillin-1 OS=Homo sapiens OX=9606 GN=FBN1 PE=1 SV=4
167	P35555	966	1011	966	1011	PF00683.18	TB	Family	1	45	45	52.3	3.5e-14	1	No_clan	sp|P35555|FBN1_HUMAN Fibrillin-1 OS=Homo sapiens OX=9606 GN=FBN1 PE=1 SV=4
168	P35555	1028	1068	1028	1068	PF07645.16	EGF_CA	Domain	1	42	42	35.4	9.4e-09	1	CL0001	sp|P35555|FBN1_HUMAN Fibrillin-1 OS=Homo sapiens OX=9606 GN=FBN1 PE=1 SV=4
169	P35555	1070	1103	1070	1111	PF07645.16	EGF_CA	Domain	1	35	42	29.6	5.9e-07	1	CL0001	sp|P35555|FBN1_HUMAN Fibrillin-1 OS=Homo sapiens OX=9606 GN=FBN1 PE=1 SV=4
170	P35555	1113	1153	1113	1153	PF07645.16	EGF_CA	Domain	1	42	42	35.1	1.1e-08	1	CL0001	sp|P35555|FBN1_HUMAN Fibrillin-1 OS=Homo sapiens OX=9606 GN=FBN1 PE=1 SV=4
171	P35555	1155	1192	1155	1195	PF07645.16	EGF_CA	Domain	1	39	42	35.1	1.2e-08	1	CL0001	sp|P35555|FBN1_HUMAN Fibrillin-1 OS=Homo sapiens OX=9606 GN=FBN1 PE=1 SV=4
172	P35555	1201	1236	1201	1236	PF14670.7	FXa_inhibition	Domain	1	36	36	41.4	1.3e-10	1	CL0001	sp|P35555|FBN1_HUMAN Fibrillin-1 OS=Homo sapiens OX=9606 GN=FBN1 PE=1 SV=4
173	P35555	1238	1278	1238	1278	PF07645.16	EGF_CA	Domain	1	42	42	29.5	6.6e-07	1	CL0001	sp|P35555|FBN1_HUMAN Fibrillin-1 OS=Homo sapiens OX=9606 GN=FBN1 PE=1 SV=4
174	P35555	1280	1320	1280	1320	PF07645.16	EGF_CA	Domain	1	42	42	31.6	1.4e-07	1	CL0001	sp|P35555|FBN1_HUMAN Fibrillin-1 OS=Homo sapiens OX=9606 GN=FBN1 PE=1 SV=4
175	P35555	1322	1357	1322	1361	PF07645.16	EGF_CA	Domain	1	38	42	42.4	6.1e-11	1	CL0001	sp|P35555|FBN1_HUMAN Fibrillin-1 OS=Homo sapiens OX=9606 GN=FBN1 PE=1 SV=4
176	P35555	1363	1402	1363	1402	PF07645.16	EGF_CA	Domain	1	42	42	43.1	3.6e-11	1	CL0001	sp|P35555|FBN1_HUMAN Fibrillin-1 OS=Homo sapiens OX=9606 GN=FBN1 PE=1 SV=4
177	P35555	1404	1444	1404	1444	PF07645.16	EGF_CA	Domain	1	42	42	29.8	5.2e-07	1	CL0001	sp|P35555|FBN1_HUMAN Fibrillin-1 OS=Homo sapiens OX=9606 GN=FBN1 PE=1 SV=4
178	P35555	1446	1485	1446	1485	PF07645.16	EGF_CA	Domain	1	42	42	24.1	3e-05	1	CL0001	sp|P35555|FBN1_HUMAN Fibrillin-1 OS=Homo sapiens OX=9606 GN=FBN1 PE=1 SV=4
179	P35555	1487	1525	1487	1534	PF07645.16	EGF_CA	Domain	1	41	42	23.7	4.1e-05	1	CL0001	sp|P35555|FBN1_HUMAN Fibrillin-1 OS=Homo sapiens OX=9606 GN=FBN1 PE=1 SV=4
180	P35555	1549	1592	1548	1592	PF00683.18	TB	Family	2	45	45	57.9	6.5e-16	1	No_clan	sp|P35555|FBN1_HUMAN Fibrillin-1 OS=Homo sapiens OX=9606 GN=FBN1 PE=1 SV=4
181	P35555	1606	1646	1606	1646	PF07645.16	EGF_CA	Domain	1	42	42	38.5	9.6e-10	1	CL0001	sp|P35555|FBN1_HUMAN Fibrillin-1 OS=Homo sapiens OX=9606 GN=FBN1 PE=1 SV=4
182	P35555	1648	1687	1648	1687	PF07645.16	EGF_CA	Domain	1	42	42	21.8	0.00016	1	CL0001	sp|P35555|FBN1_HUMAN Fibrillin-1 OS=Homo sapiens OX=9606 GN=FBN1 PE=1 SV=4
183	P35555	1706	1749	1705	1751	PF00683.18	TB	Family	2	43	45	52.3	3.6e-14	1	No_clan	sp|P35555|FBN1_HUMAN Fibrillin-1 OS=Homo sapiens OX=9606 GN=FBN1 PE=1 SV=4
184	P35555	1766	1802	1766	1806	PF07645.16	EGF_CA	Domain	1	38	42	35.7	7.2e-09	1	CL0001	sp|P35555|FBN1_HUMAN Fibrillin-1 OS=Homo sapiens OX=9606 GN=FBN1 PE=1 SV=4
185	P35555	1808	1845	1808	1847	PF07645.16	EGF_CA	Domain	1	40	42	39.4	5.3e-10	1	CL0001	sp|P35555|FBN1_HUMAN Fibrillin-1 OS=Homo sapiens OX=9606 GN=FBN1 PE=1 SV=4
186	P35555	1849	1889	1849	1889	PF07645.16	EGF_CA	Domain	1	42	42	30.3	3.5e-07	1	CL0001	sp|P35555|FBN1_HUMAN Fibrillin-1 OS=Homo sapiens OX=9606 GN=FBN1 PE=1 SV=4
187	P35555	1891	1921	1891	1928	PF07645.16	EGF_CA	Domain	1	34	42	24.2	2.8e-05	1	CL0001	sp|P35555|FBN1_HUMAN Fibrillin-1 OS=Homo sapiens OX=9606 GN=FBN1 PE=1 SV=4
188	P35555	1930	1971	1930	1971	PF07645.16	EGF_CA	Domain	1	42	42	40.8	1.8e-10	1	CL0001	sp|P35555|FBN1_HUMAN Fibrillin-1 OS=Homo sapiens OX=9606 GN=FBN1 PE=1 SV=4
189	P35555	1973	2011	1973	2011	PF07645.16	EGF_CA	Domain	1	42	42	36.8	3.4e-09	1	CL0001	sp|P35555|FBN1_HUMAN Fibrillin-1 OS=Homo sapiens OX=9606 GN=FBN1 PE=1 SV=4
190	P35555	2013	2053	2013	2053	PF07645.16	EGF_CA	Domain	1	42	42	38.3	1.1e-09	1	CL0001	sp|P35555|FBN1_HUMAN Fibrillin-1 OS=Homo sapiens OX=9606 GN=FBN1 PE=1 SV=4
191	P35555	2069	2113	2069	2114	PF00683.18	TB	Family	1	44	45	50.5	1.3e-13	1	No_clan	sp|P35555|FBN1_HUMAN Fibrillin-1 OS=Homo sapiens OX=9606 GN=FBN1 PE=1 SV=4
192	P35555	2127	2158	2127	2164	PF07645.16	EGF_CA	Domain	1	34	42	29.4	6.9e-07	1	CL0001	sp|P35555|FBN1_HUMAN Fibrillin-1 OS=Homo sapiens OX=9606 GN=FBN1 PE=1 SV=4
193	P35555	2166	2200	2166	2204	PF07645.16	EGF_CA	Domain	1	37	42	25.8	9.4e-06	1	CL0001	sp|P35555|FBN1_HUMAN Fibrillin-1 OS=Homo sapiens OX=9606 GN=FBN1 PE=1 SV=4
194	P35555	2206	2245	2206	2245	PF07645.16	EGF_CA	Domain	1	42	42	35.5	8.3e-09	1	CL0001	sp|P35555|FBN1_HUMAN Fibrillin-1 OS=Homo sapiens OX=9606 GN=FBN1 PE=1 SV=4
195	P35555	2247	2289	2247	2289	PF07645.16	EGF_CA	Domain	1	42	42	33.9	2.6e-08	1	CL0001	sp|P35555|FBN1_HUMAN Fibrillin-1 OS=Homo sapiens OX=9606 GN=FBN1 PE=1 SV=4
196	P35555	2291	2331	2291	2331	PF07645.16	EGF_CA	Domain	1	42	42	27.7	2.4e-06	1	CL0001	sp|P35555|FBN1_HUMAN Fibrillin-1 OS=Homo sapiens OX=9606 GN=FBN1 PE=1 SV=4
197	P35555	2354	2393	2347	2393	PF00683.18	TB	Family	6	45	45	54.7	6.3e-15	1	No_clan	sp|P35555|FBN1_HUMAN Fibrillin-1 OS=Homo sapiens OX=9606 GN=FBN1 PE=1 SV=4
198	P35555	2402	2442	2402	2442	PF07645.16	EGF_CA	Domain	1	42	42	34.8	1.4e-08	1	CL0001	sp|P35555|FBN1_HUMAN Fibrillin-1 OS=Homo sapiens OX=9606 GN=FBN1 PE=1 SV=4
199	P35555	2444	2483	2444	2483	PF07645.16	EGF_CA	Domain	1	42	42	35.5	8.4e-09	1	CL0001	sp|P35555|FBN1_HUMAN Fibrillin-1 OS=Homo sapiens OX=9606 GN=FBN1 PE=1 SV=4
200	P35555	2485	2522	2485	2522	PF07645.16	EGF_CA	Domain	1	42	42	39.2	5.9e-10	1	CL0001	sp|P35555|FBN1_HUMAN Fibrillin-1 OS=Homo sapiens OX=9606 GN=FBN1 PE=1 SV=4
201	P35555	2547	2570	2547	2570	PF12662.8	cEGF	Domain	1	24	24	28.2	1.3e-06	1	CL0001	sp|P35555|FBN1_HUMAN Fibrillin-1 OS=Homo sapiens OX=9606 GN=FBN1 PE=1 SV=4
202	P35555	2607	2641	2607	2646	PF07645.16	EGF_CA	Domain	1	37	42	25.8	9e-06	1	CL0001	sp|P35555|FBN1_HUMAN Fibrillin-1 OS=Homo sapiens OX=9606 GN=FBN1 PE=1 SV=4
203	P35555	2648	2679	2648	2686	PF07645.16	EGF_CA	Domain	1	34	42	24.9	1.8e-05	1	CL0001	sp|P35555|FBN1_HUMAN Fibrillin-1 OS=Homo sapiens OX=9606 GN=FBN1 PE=1 SV=4
204	Q75N90	47	83	47	83	PF18193.2	Fibrillin_U_N	Domain	1	37	37	72.6	1.9e-20	1	CL0001	sp|Q75N90|FBN3_HUMAN Fibrillin-3 OS=Homo sapiens OX=9606 GN=FBN3 PE=2 SV=3
205	Q75N90	196	229	195	235	PF00683.18	TB	Family	2	34	45	31	1.6e-07	1	No_clan	sp|Q75N90|FBN3_HUMAN Fibrillin-3 OS=Homo sapiens OX=9606 GN=FBN3 PE=2 SV=3
206	Q75N90	247	287	247	287	PF07645.16	EGF_CA	Domain	1	42	42	33.8	2.8e-08	1	CL0001	sp|Q75N90|FBN3_HUMAN Fibrillin-3 OS=Homo sapiens OX=9606 GN=FBN3 PE=2 SV=3
207	Q75N90	303	348	303	349	PF00683.18	TB	Family	1	44	45	48.4	5.8e-13	1	No_clan	sp|Q75N90|FBN3_HUMAN Fibrillin-3 OS=Homo sapiens OX=9606 GN=FBN3 PE=2 SV=3
208	Q75N90	449	487	449	487	PF07645.16	EGF_CA	Domain	1	42	42	30.2	3.9e-07	1	CL0001	sp|Q75N90|FBN3_HUMAN Fibrillin-3 OS=Homo sapiens OX=9606 GN=FBN3 PE=2 SV=3
209	Q75N90	489	529	489	529	PF07645.16	EGF_CA	Domain	1	42	42	36.9	3.1e-09	1	CL0001	sp|Q75N90|FBN3_HUMAN Fibrillin-3 OS=Homo sapiens OX=9606 GN=FBN3 PE=2 SV=3
210	Q75N90	531	570	531	570	PF07645.16	EGF_CA	Domain	1	42	42	31.3	1.7e-07	1	CL0001	sp|Q75N90|FBN3_HUMAN Fibrillin-3 OS=Homo sapiens OX=9606 GN=FBN3 PE=2 SV=3
211	Q75N90	572	611	572	611	PF07645.16	EGF_CA	Domain	1	42	42	31.2	1.9e-07	1	CL0001	sp|Q75N90|FBN3_HUMAN Fibrillin-3 OS=Homo sapiens OX=9606 GN=FBN3 PE=2 SV=3
212	Q75N90	629	673	628	673	PF00683.18	TB	Family	2	45	45	49.8	2.1e-13	1	No_clan	sp|Q75N90|FBN3_HUMAN Fibrillin-3 OS=Homo sapiens OX=9606 GN=FBN3 PE=2 SV=3
213	Q75N90	682	722	682	722	PF07645.16	EGF_CA	Domain	1	42	42	38.3	1.1e-09	1	CL0001	sp|Q75N90|FBN3_HUMAN Fibrillin-3 OS=Homo sapiens OX=9606 GN=FBN3 PE=2 SV=3
214	Q75N90	724	757	724	764	PF07645.16	EGF_CA	Domain	1	35	42	32.7	6.6e-08	1	CL0001	sp|Q75N90|FBN3_HUMAN Fibrillin-3 OS=Homo sapiens OX=9606 GN=FBN3 PE=2 SV=3
215	Q75N90	766	804	766	804	PF07645.16	EGF_CA	Domain	1	42	42	24.9	1.8e-05	1	CL0001	sp|Q75N90|FBN3_HUMAN Fibrillin-3 OS=Homo sapiens OX=9606 GN=FBN3 PE=2 SV=3
216	Q75N90	820	852	820	862	PF00683.18	TB	Family	1	33	45	30.2	2.9e-07	1	No_clan	sp|Q75N90|FBN3_HUMAN Fibrillin-3 OS=Homo sapiens OX=9606 GN=FBN3 PE=2 SV=3
217	Q75N90	869	901	869	909	PF07645.16	EGF_CA	Domain	1	34	42	35.6	7.8e-09	1	CL0001	sp|Q75N90|FBN3_HUMAN Fibrillin-3 OS=Homo sapiens OX=9606 GN=FBN3 PE=2 SV=3
218	Q75N90	925	969	925	969	PF00683.18	TB	Family	1	45	45	46.7	2e-12	1	No_clan	sp|Q75N90|FBN3_HUMAN Fibrillin-3 OS=Homo sapiens OX=9606 GN=FBN3 PE=2 SV=3
219	Q75N90	986	1026	986	1026	PF07645.16	EGF_CA	Domain	1	42	42	29.8	5.3e-07	1	CL0001	sp|Q75N90|FBN3_HUMAN Fibrillin-3 OS=Homo sapiens OX=9606 GN=FBN3 PE=2 SV=3
220	Q75N90	1028	1060	1028	1069	PF07645.16	EGF_CA	Domain	1	34	42	33.7	3e-08	1	CL0001	sp|Q75N90|FBN3_HUMAN Fibrillin-3 OS=Homo sapiens OX=9606 GN=FBN3 PE=2 SV=3
221	Q75N90	1071	1111	1071	1111	PF07645.16	EGF_CA	Domain	1	42	42	37.6	1.9e-09	1	CL0001	sp|Q75N90|FBN3_HUMAN Fibrillin-3 OS=Homo sapiens OX=9606 GN=FBN3 PE=2 SV=3
222	Q75N90	1136	1158	1135	1158	PF12662.8	cEGF	Domain	2	24	24	32.3	7e-08	1	CL0001	sp|Q75N90|FBN3_HUMAN Fibrillin-3 OS=Homo sapiens OX=9606 GN=FBN3 PE=2 SV=3
223	Q75N90	1176	1199	1176	1199	PF12662.8	cEGF	Domain	1	24	24	35.2	8.6e-09	1	CL0001	sp|Q75N90|FBN3_HUMAN Fibrillin-3 OS=Homo sapiens OX=9606 GN=FBN3 PE=2 SV=3
224	Q75N90	1238	1278	1238	1278	PF07645.16	EGF_CA	Domain	1	42	42	33.5	3.6e-08	1	CL0001	sp|Q75N90|FBN3_HUMAN Fibrillin-3 OS=Homo sapiens OX=9606 GN=FBN3 PE=2 SV=3
225	Q75N90	1280	1319	1280	1319	PF07645.16	EGF_CA	Domain	1	42	42	41.2	1.5e-10	1	CL0001	sp|Q75N90|FBN3_HUMAN Fibrillin-3 OS=Homo sapiens OX=9606 GN=FBN3 PE=2 SV=3
226	Q75N90	1321	1355	1321	1360	PF07645.16	EGF_CA	Domain	1	37	42	34.6	1.6e-08	1	CL0001	sp|Q75N90|FBN3_HUMAN Fibrillin-3 OS=Homo sapiens OX=9606 GN=FBN3 PE=2 SV=3
227	Q75N90	1362	1402	1362	1402	PF07645.16	EGF_CA	Domain	1	42	42	27.1	3.6e-06	1	CL0001	sp|Q75N90|FBN3_HUMAN Fibrillin-3 OS=Homo sapiens OX=9606 GN=FBN3 PE=2 SV=3
228	Q75N90	1404	1443	1404	1443	PF07645.16	EGF_CA	Domain	1	42	42	24.4	2.5e-05	1	CL0001	sp|Q75N90|FBN3_HUMAN Fibrillin-3 OS=Homo sapiens OX=9606 GN=FBN3 PE=2 SV=3
229	Q75N90	1445	1484	1445	1487	PF07645.16	EGF_CA	Domain	1	42	42	30.4	3.5e-07	1	CL0001	sp|Q75N90|FBN3_HUMAN Fibrillin-3 OS=Homo sapiens OX=9606 GN=FBN3 PE=2 SV=3
230	Q75N90	1506	1549	1505	1549	PF00683.18	TB	Family	2	45	45	57.3	9.5e-16	1	No_clan	sp|Q75N90|FBN3_HUMAN Fibrillin-3 OS=Homo sapiens OX=9606 GN=FBN3 PE=2 SV=3
231	Q75N90	1563	1600	1563	1603	PF07645.16	EGF_CA	Domain	1	39	42	36.3	4.7e-09	1	CL0001	sp|Q75N90|FBN3_HUMAN Fibrillin-3 OS=Homo sapiens OX=9606 GN=FBN3 PE=2 SV=3
232	Q75N90	1605	1645	1605	1645	PF07645.16	EGF_CA	Domain	1	42	42	24.8	1.9e-05	1	CL0001	sp|Q75N90|FBN3_HUMAN Fibrillin-3 OS=Homo sapiens OX=9606 GN=FBN3 PE=2 SV=3
233	Q75N90	1660	1704	1660	1706	PF00683.18	TB	Family	1	43	45	49.1	3.6e-13	1	No_clan	sp|Q75N90|FBN3_HUMAN Fibrillin-3 OS=Homo sapiens OX=9606 GN=FBN3 PE=2 SV=3
234	Q75N90	1721	1756	1721	1761	PF07645.16	EGF_CA	Domain	1	37	42	37.7	1.8e-09	1	CL0001	sp|Q75N90|FBN3_HUMAN Fibrillin-3 OS=Homo sapiens OX=9606 GN=FBN3 PE=2 SV=3
235	Q75N90	1763	1800	1763	1803	PF07645.16	EGF_CA	Domain	1	39	42	39.1	6.2e-10	1	CL0001	sp|Q75N90|FBN3_HUMAN Fibrillin-3 OS=Homo sapiens OX=9606 GN=FBN3 PE=2 SV=3
236	Q75N90	1807	1845	1806	1845	PF07645.16	EGF_CA	Domain	3	42	42	27.9	2e-06	1	CL0001	sp|Q75N90|FBN3_HUMAN Fibrillin-3 OS=Homo sapiens OX=9606 GN=FBN3 PE=2 SV=3
237	Q75N90	1847	1881	1847	1884	PF07645.16	EGF_CA	Domain	1	39	42	24.6	2.2e-05	1	CL0001	sp|Q75N90|FBN3_HUMAN Fibrillin-3 OS=Homo sapiens OX=9606 GN=FBN3 PE=2 SV=3
238	Q75N90	1886	1927	1886	1927	PF07645.16	EGF_CA	Domain	1	42	42	35	1.2e-08	1	CL0001	sp|Q75N90|FBN3_HUMAN Fibrillin-3 OS=Homo sapiens OX=9606 GN=FBN3 PE=2 SV=3
239	Q75N90	1929	1966	1929	1967	PF07645.16	EGF_CA	Domain	1	41	42	31.7	1.3e-07	1	CL0001	sp|Q75N90|FBN3_HUMAN Fibrillin-3 OS=Homo sapiens OX=9606 GN=FBN3 PE=2 SV=3
240	Q75N90	1969	2009	1969	2009	PF07645.16	EGF_CA	Domain	1	42	42	34.1	2.4e-08	1	CL0001	sp|Q75N90|FBN3_HUMAN Fibrillin-3 OS=Homo sapiens OX=9606 GN=FBN3 PE=2 SV=3
241	Q75N90	2025	2070	2025	2071	PF00683.18	TB	Family	1	44	45	55.1	4.8e-15	1	No_clan	sp|Q75N90|FBN3_HUMAN Fibrillin-3 OS=Homo sapiens OX=9606 GN=FBN3 PE=2 SV=3
242	Q75N90	2084	2118	2084	2124	PF07645.16	EGF_CA	Domain	1	36	42	33.8	2.8e-08	1	CL0001	sp|Q75N90|FBN3_HUMAN Fibrillin-3 OS=Homo sapiens OX=9606 GN=FBN3 PE=2 SV=3
243	Q75N90	2126	2159	2126	2164	PF07645.16	EGF_CA	Domain	1	36	42	26.7	4.7e-06	1	CL0001	sp|Q75N90|FBN3_HUMAN Fibrillin-3 OS=Homo sapiens OX=9606 GN=FBN3 PE=2 SV=3
244	Q75N90	2166	2205	2166	2205	PF07645.16	EGF_CA	Domain	1	42	42	33.2	4.4e-08	1	CL0001	sp|Q75N90|FBN3_HUMAN Fibrillin-3 OS=Homo sapiens OX=9606 GN=FBN3 PE=2 SV=3
245	Q75N90	2207	2241	2207	2250	PF07645.16	EGF_CA	Domain	1	34	42	39.1	6.3e-10	1	CL0001	sp|Q75N90|FBN3_HUMAN Fibrillin-3 OS=Homo sapiens OX=9606 GN=FBN3 PE=2 SV=3
246	Q75N90	2252	2292	2252	2292	PF07645.16	EGF_CA	Domain	1	42	42	30.7	2.7e-07	1	CL0001	sp|Q75N90|FBN3_HUMAN Fibrillin-3 OS=Homo sapiens OX=9606 GN=FBN3 PE=2 SV=3
247	Q75N90	2314	2354	2308	2354	PF00683.18	TB	Family	5	45	45	52.8	2.5e-14	1	No_clan	sp|Q75N90|FBN3_HUMAN Fibrillin-3 OS=Homo sapiens OX=9606 GN=FBN3 PE=2 SV=3
248	Q75N90	2363	2403	2363	2403	PF07645.16	EGF_CA	Domain	1	42	42	42.2	6.9e-11	1	CL0001	sp|Q75N90|FBN3_HUMAN Fibrillin-3 OS=Homo sapiens OX=9606 GN=FBN3 PE=2 SV=3
249	Q75N90	2405	2444	2405	2444	PF07645.16	EGF_CA	Domain	1	42	42	34.8	1.4e-08	1	CL0001	sp|Q75N90|FBN3_HUMAN Fibrillin-3 OS=Homo sapiens OX=9606 GN=FBN3 PE=2 SV=3
250	Q75N90	2446	2483	2446	2483	PF07645.16	EGF_CA	Domain	1	42	42	36.9	3.2e-09	1	CL0001	sp|Q75N90|FBN3_HUMAN Fibrillin-3 OS=Homo sapiens OX=9606 GN=FBN3 PE=2 SV=3
251	Q75N90	2485	2522	2485	2526	PF07645.16	EGF_CA	Domain	1	38	42	30.5	3.1e-07	1	CL0001	sp|Q75N90|FBN3_HUMAN Fibrillin-3 OS=Homo sapiens OX=9606 GN=FBN3 PE=2 SV=3
252	Q75N90	2528	2566	2528	2566	PF07645.16	EGF_CA	Domain	1	42	42	27.8	2.1e-06	1	CL0001	sp|Q75N90|FBN3_HUMAN Fibrillin-3 OS=Homo sapiens OX=9606 GN=FBN3 PE=2 SV=3
253	Q75N90	2568	2600	2568	2608	PF07645.16	EGF_CA	Domain	1	34	42	26.9	4.2e-06	1	CL0001	sp|Q75N90|FBN3_HUMAN Fibrillin-3 OS=Homo sapiens OX=9606 GN=FBN3 PE=2 SV=3
254	Q75N90	2611	2648	2610	2648	PF07645.16	EGF_CA	Domain	2	42	42	23.1	6.4e-05	1	CL0001	sp|Q75N90|FBN3_HUMAN Fibrillin-3 OS=Homo sapiens OX=9606 GN=FBN3 PE=2 SV=3
255	Q9NZR2	32	69	30	69	PF00057.19	Ldl_recept_a	Repeat	3	37	37	36.9	3.2e-09	1	No_clan	sp|Q9NZR2|LRP1B_HUMAN Low-density lipoprotein receptor-related protein 1B OS=Homo sapiens OX=9606 GN=LRP1B PE=1 SV=2
256	Q9NZR2	76	113	75	113	PF00057.19	Ldl_recept_a	Repeat	2	37	37	27.2	3.3e-06	1	No_clan	sp|Q9NZR2|LRP1B_HUMAN Low-density lipoprotein receptor-related protein 1B OS=Homo sapiens OX=9606 GN=LRP1B PE=1 SV=2
257	Q9NZR2	155	193	155	193	PF07645.16	EGF_CA	Domain	1	42	42	25.3	1.3e-05	1	CL0001	sp|Q9NZR2|LRP1B_HUMAN Low-density lipoprotein receptor-related protein 1B OS=Homo sapiens OX=9606 GN=LRP1B PE=1 SV=2
258	Q9NZR2	295	335	295	335	PF00058.18	Ldl_recept_b	Repeat	1	42	42	27	4.7e-06	1	CL0186	sp|Q9NZR2|LRP1B_HUMAN Low-density lipoprotein receptor-related protein 1B OS=Homo sapiens OX=9606 GN=LRP1B PE=1 SV=2
259	Q9NZR2	568	608	568	608	PF00058.18	Ldl_recept_b	Repeat	1	42	42	22.9	9.2e-05	1	CL0186	sp|Q9NZR2|LRP1B_HUMAN Low-density lipoprotein receptor-related protein 1B OS=Homo sapiens OX=9606 GN=LRP1B PE=1 SV=2
260	Q9NZR2	611	654	611	654	PF00058.18	Ldl_recept_b	Repeat	1	42	42	22.9	8.9e-05	1	CL0186	sp|Q9NZR2|LRP1B_HUMAN Low-density lipoprotein receptor-related protein 1B OS=Homo sapiens OX=9606 GN=LRP1B PE=1 SV=2
261	Q9NZR2	659	703	657	704	PF00058.18	Ldl_recept_b	Repeat	3	41	42	26.7	5.9e-06	1	CL0186	sp|Q9NZR2|LRP1B_HUMAN Low-density lipoprotein receptor-related protein 1B OS=Homo sapiens OX=9606 GN=LRP1B PE=1 SV=2
262	Q9NZR2	798	833	798	833	PF14670.7	FXa_inhibition	Domain	1	36	36	35.4	1e-08	1	CL0001	sp|Q9NZR2|LRP1B_HUMAN Low-density lipoprotein receptor-related protein 1B OS=Homo sapiens OX=9606 GN=LRP1B PE=1 SV=2
263	Q9NZR2	845	881	843	881	PF00057.19	Ldl_recept_a	Repeat	3	37	37	41.6	1.1e-10	1	No_clan	sp|Q9NZR2|LRP1B_HUMAN Low-density lipoprotein receptor-related protein 1B OS=Homo sapiens OX=9606 GN=LRP1B PE=1 SV=2
264	Q9NZR2	885	922	884	922	PF00057.19	Ldl_recept_a	Repeat	2	37	37	35.6	7.8e-09	1	No_clan	sp|Q9NZR2|LRP1B_HUMAN Low-density lipoprotein receptor-related protein 1B OS=Homo sapiens OX=9606 GN=LRP1B PE=1 SV=2
265	Q9NZR2	925	962	925	962	PF00057.19	Ldl_recept_a	Repeat	1	37	37	40.8	1.8e-10	1	No_clan	sp|Q9NZR2|LRP1B_HUMAN Low-density lipoprotein receptor-related protein 1B OS=Homo sapiens OX=9606 GN=LRP1B PE=1 SV=2
266	Q9NZR2	966	1002	965	1002	PF00057.19	Ldl_recept_a	Repeat	2	37	37	43.2	3.3e-11	1	No_clan	sp|Q9NZR2|LRP1B_HUMAN Low-density lipoprotein receptor-related protein 1B OS=Homo sapiens OX=9606 GN=LRP1B PE=1 SV=2
267	Q9NZR2	1005	1042	1004	1042	PF00057.19	Ldl_recept_a	Repeat	2	37	37	40.4	2.6e-10	1	No_clan	sp|Q9NZR2|LRP1B_HUMAN Low-density lipoprotein receptor-related protein 1B OS=Homo sapiens OX=9606 GN=LRP1B PE=1 SV=2
268	Q9NZR2	1053	1088	1051	1088	PF00057.19	Ldl_recept_a	Repeat	3	37	37	41.4	1.2e-10	1	No_clan	sp|Q9NZR2|LRP1B_HUMAN Low-density lipoprotein receptor-related protein 1B OS=Homo sapiens OX=9606 GN=LRP1B PE=1 SV=2
269	Q9NZR2	1095	1131	1093	1131	PF00057.19	Ldl_recept_a	Repeat	3	37	37	32.2	9e-08	1	No_clan	sp|Q9NZR2|LRP1B_HUMAN Low-density lipoprotein receptor-related protein 1B OS=Homo sapiens OX=9606 GN=LRP1B PE=1 SV=2
270	Q9NZR2	1176	1212	1176	1212	PF14670.7	FXa_inhibition	Domain	1	36	36	36.5	4.5e-09	1	CL0001	sp|Q9NZR2|LRP1B_HUMAN Low-density lipoprotein receptor-related protein 1B OS=Homo sapiens OX=9606 GN=LRP1B PE=1 SV=2
271	Q9NZR2	1347	1387	1347	1387	PF00058.18	Ldl_recept_b	Repeat	1	42	42	40.1	3.9e-10	1	CL0186	sp|Q9NZR2|LRP1B_HUMAN Low-density lipoprotein receptor-related protein 1B OS=Homo sapiens OX=9606 GN=LRP1B PE=1 SV=2
272	Q9NZR2	1392	1434	1390	1434	PF00058.18	Ldl_recept_b	Repeat	3	42	42	29.6	7.3e-07	1	CL0186	sp|Q9NZR2|LRP1B_HUMAN Low-density lipoprotein receptor-related protein 1B OS=Homo sapiens OX=9606 GN=LRP1B PE=1 SV=2
273	Q9NZR2	1619	1658	1618	1658	PF00058.18	Ldl_recept_b	Repeat	2	42	42	31.9	1.4e-07	1	CL0186	sp|Q9NZR2|LRP1B_HUMAN Low-density lipoprotein receptor-related protein 1B OS=Homo sapiens OX=9606 GN=LRP1B PE=1 SV=2
274	Q9NZR2	1838	1874	1838	1874	PF14670.7	FXa_inhibition	Domain	1	36	36	33.5	3.9e-08	1	CL0001	sp|Q9NZR2|LRP1B_HUMAN Low-density lipoprotein receptor-related protein 1B OS=Homo sapiens OX=9606 GN=LRP1B PE=1 SV=2
275	Q9NZR2	1965	2005	1965	2005	PF00058.18	Ldl_recept_b	Repeat	1	42	42	35.6	1e-08	1	CL0186	sp|Q9NZR2|LRP1B_HUMAN Low-density lipoprotein receptor-related protein 1B OS=Homo sapiens OX=9606 GN=LRP1B PE=1 SV=2
276	Q9NZR2	2008	2049	2008	2049	PF00058.18	Ldl_recept_b	Repeat	1	42	42	29.2	9.8e-07	1	CL0186	sp|Q9NZR2|LRP1B_HUMAN Low-density lipoprotein receptor-related protein 1B OS=Homo sapiens OX=9606 GN=LRP1B PE=1 SV=2
277	Q9NZR2	2330	2372	2330	2372	PF00058.18	Ldl_recept_b	Repeat	1	42	42	35.6	1e-08	1	CL0186	sp|Q9NZR2|LRP1B_HUMAN Low-density lipoprotein receptor-related protein 1B OS=Homo sapiens OX=9606 GN=LRP1B PE=1 SV=2
278	Q9NZR2	2509	2543	2508	2547	PF00057.19	Ldl_recept_a	Repeat	2	35	37	33	5.4e-08	1	No_clan	sp|Q9NZR2|LRP1B_HUMAN Low-density lipoprotein receptor-related protein 1B OS=Homo sapiens OX=9606 GN=LRP1B PE=1 SV=2
279	Q9NZR2	2551	2586	2550	2586	PF00057.19	Ldl_recept_a	Repeat	2	37	37	32.9	5.5e-08	1	No_clan	sp|Q9NZR2|LRP1B_HUMAN Low-density lipoprotein receptor-related protein 1B OS=Homo sapiens OX=9606 GN=LRP1B PE=1 SV=2
280	Q9NZR2	2589	2625	2589	2625	PF00057.19	Ldl_recept_a	Repeat	1	37	37	40.7	2e-10	1	No_clan	sp|Q9NZR2|LRP1B_HUMAN Low-density lipoprotein receptor-related protein 1B OS=Homo sapiens OX=9606 GN=LRP1B PE=1 SV=2
281	Q9NZR2	2644	2674	2641	2674	PF00057.19	Ldl_recept_a	Repeat	8	37	37	32	1e-07	1	No_clan	sp|Q9NZR2|LRP1B_HUMAN Low-density lipoprotein receptor-related protein 1B OS=Homo sapiens OX=9606 GN=LRP1B PE=1 SV=2
282	Q9NZR2	2681	2716	2680	2716	PF00057.19	Ldl_recept_a	Repeat	2	37	37	37.8	1.6e-09	1	No_clan	sp|Q9NZR2|LRP1B_HUMAN Low-density lipoprotein receptor-related protein 1B OS=Homo sapiens OX=9606 GN=LRP1B PE=1 SV=2
283	Q9NZR2	2719	2752	2718	2756	PF00057.19	Ldl_recept_a	Repeat	2	35	37	30.9	2.4e-07	1	No_clan	sp|Q9NZR2|LRP1B_HUMAN Low-density lipoprotein receptor-related protein 1B OS=Homo sapiens OX=9606 GN=LRP1B PE=1 SV=2
284	Q9NZR2	2760	2799	2759	2799	PF00057.19	Ldl_recept_a	Repeat	2	37	37	44.6	1.2e-11	1	No_clan	sp|Q9NZR2|LRP1B_HUMAN Low-density lipoprotein receptor-related protein 1B OS=Homo sapiens OX=9606 GN=LRP1B PE=1 SV=2
285	Q9NZR2	2803	2840	2803	2840	PF00057.19	Ldl_recept_a	Repeat	1	37	37	38.4	1e-09	1	No_clan	sp|Q9NZR2|LRP1B_HUMAN Low-density lipoprotein receptor-related protein 1B OS=Homo sapiens OX=9606 GN=LRP1B PE=1 SV=2
286	Q9NZR2	2844	2878	2843	2884	PF00057.19	Ldl_recept_a	Repeat	2	35	37	33.3	4.3e-08	1	No_clan	sp|Q9NZR2|LRP1B_HUMAN Low-density lipoprotein receptor-related protein 1B OS=Homo sapiens OX=9606 GN=LRP1B PE=1 SV=2
287	Q9NZR2	2890	2925	2889	2925	PF00057.19	Ldl_recept_a	Repeat	2	37	37	33.9	2.7e-08	1	No_clan	sp|Q9NZR2|LRP1B_HUMAN Low-density lipoprotein receptor-related protein 1B OS=Homo sapiens OX=9606 GN=LRP1B PE=1 SV=2
288	Q9NZR2	2948	2971	2948	2971	PF12662.8	cEGF	Domain	1	24	24	40	2.7e-10	1	CL0001	sp|Q9NZR2|LRP1B_HUMAN Low-density lipoprotein receptor-related protein 1B OS=Homo sapiens OX=9606 GN=LRP1B PE=1 SV=2
289	Q9NZR2	3018	3235	3007	3241	PF16472.6	DUF5050	Domain	73	276	282	33.7	2.2e-08	1	CL0186	sp|Q9NZR2|LRP1B_HUMAN Low-density lipoprotein receptor-related protein 1B OS=Homo sapiens OX=9606 GN=LRP1B PE=1 SV=2
290	Q9NZR2	3277	3313	3277	3313	PF14670.7	FXa_inhibition	Domain	1	36	36	43.5	2.9e-11	1	CL0001	sp|Q9NZR2|LRP1B_HUMAN Low-density lipoprotein receptor-related protein 1B OS=Homo sapiens OX=9606 GN=LRP1B PE=1 SV=2
291	Q9NZR2	3316	3352	3315	3352	PF00057.19	Ldl_recept_a	Repeat	2	37	37	31.9	1.1e-07	1	No_clan	sp|Q9NZR2|LRP1B_HUMAN Low-density lipoprotein receptor-related protein 1B OS=Homo sapiens OX=9606 GN=LRP1B PE=1 SV=2
292	Q9NZR2	3356	3391	3355	3391	PF00057.19	Ldl_recept_a	Repeat	2	37	37	37.7	1.7e-09	1	No_clan	sp|Q9NZR2|LRP1B_HUMAN Low-density lipoprotein receptor-related protein 1B OS=Homo sapiens OX=9606 GN=LRP1B PE=1 SV=2
293	Q9NZR2	3396	3431	3394	3431	PF00057.19	Ldl_recept_a	Repeat	3	37	37	32.3	8.9e-08	1	No_clan	sp|Q9NZR2|LRP1B_HUMAN Low-density lipoprotein receptor-related protein 1B OS=Homo sapiens OX=9606 GN=LRP1B PE=1 SV=2
294	Q9NZR2	3435	3471	3434	3471	PF00057.19	Ldl_recept_a	Repeat	2	37	37	43.1	3.5e-11	1	No_clan	sp|Q9NZR2|LRP1B_HUMAN Low-density lipoprotein receptor-related protein 1B OS=Homo sapiens OX=9606 GN=LRP1B PE=1 SV=2
295	Q9NZR2	3474	3510	3474	3510	PF00057.19	Ldl_recept_a	Repeat	1	37	37	47.1	2e-12	1	No_clan	sp|Q9NZR2|LRP1B_HUMAN Low-density lipoprotein receptor-related protein 1B OS=Homo sapiens OX=9606 GN=LRP1B PE=1 SV=2
296	Q9NZR2	3513	3549	3513	3549	PF00057.19	Ldl_recept_a	Repeat	1	37	37	36.8	3.4e-09	1	No_clan	sp|Q9NZR2|LRP1B_HUMAN Low-density lipoprotein receptor-related protein 1B OS=Homo sapiens OX=9606 GN=LRP1B PE=1 SV=2
297	Q9NZR2	3552	3587	3551	3587	PF00057.19	Ldl_recept_a	Repeat	2	37	37	40.4	2.5e-10	1	No_clan	sp|Q9NZR2|LRP1B_HUMAN Low-density lipoprotein receptor-related protein 1B OS=Homo sapiens OX=9606 GN=LRP1B PE=1 SV=2
298	Q9NZR2	3593	3628	3592	3628	PF00057.19	Ldl_recept_a	Repeat	2	37	37	36.7	3.7e-09	1	No_clan	sp|Q9NZR2|LRP1B_HUMAN Low-density lipoprotein receptor-related protein 1B OS=Homo sapiens OX=9606 GN=LRP1B PE=1 SV=2
299	Q9NZR2	3631	3667	3630	3667	PF00057.19	Ldl_recept_a	Repeat	2	37	37	44.5	1.3e-11	1	No_clan	sp|Q9NZR2|LRP1B_HUMAN Low-density lipoprotein receptor-related protein 1B OS=Homo sapiens OX=9606 GN=LRP1B PE=1 SV=2
300	Q9NZR2	3674	3708	3672	3710	PF00057.19	Ldl_recept_a	Repeat	3	35	37	29.7	5.8e-07	1	No_clan	sp|Q9NZR2|LRP1B_HUMAN Low-density lipoprotein receptor-related protein 1B OS=Homo sapiens OX=9606 GN=LRP1B PE=1 SV=2
301	Q9NZR2	3761	3796	3760	3796	PF00057.19	Ldl_recept_a	Repeat	2	37	37	40.4	2.4e-10	1	No_clan	sp|Q9NZR2|LRP1B_HUMAN Low-density lipoprotein receptor-related protein 1B OS=Homo sapiens OX=9606 GN=LRP1B PE=1 SV=2
302	Q9NZR2	3844	3880	3844	3880	PF07645.16	EGF_CA	Domain	1	42	42	22.7	8.6e-05	1	CL0001	sp|Q9NZR2|LRP1B_HUMAN Low-density lipoprotein receptor-related protein 1B OS=Homo sapiens OX=9606 GN=LRP1B PE=1 SV=2
303	Q9NZR2	4040	4080	4039	4080	PF00058.18	Ldl_recept_b	Repeat	2	42	42	28.1	2.1e-06	1	CL0186	sp|Q9NZR2|LRP1B_HUMAN Low-density lipoprotein receptor-related protein 1B OS=Homo sapiens OX=9606 GN=LRP1B PE=1 SV=2
304	Q9NZR2	4253	4283	4253	4283	PF00008.28	EGF	Domain	1	32	32	25.7	1e-05	1	CL0001	sp|Q9NZR2|LRP1B_HUMAN Low-density lipoprotein receptor-related protein 1B OS=Homo sapiens OX=9606 GN=LRP1B PE=1 SV=2
305	Q07954	25	62	25	64	PF00057.19	Ldl_recept_a	Repeat	1	35	37	41.6	1.1e-10	1	No_clan	sp|Q07954|LRP1_HUMAN Prolow-density lipoprotein receptor-related protein 1 OS=Homo sapiens OX=9606 GN=LRP1 PE=1 SV=2
306	Q07954	71	108	70	108	PF00057.19	Ldl_recept_a	Repeat	2	37	37	40.1	3e-10	1	No_clan	sp|Q07954|LRP1_HUMAN Prolow-density lipoprotein receptor-related protein 1 OS=Homo sapiens OX=9606 GN=LRP1 PE=1 SV=2
307	Q07954	150	188	150	188	PF07645.16	EGF_CA	Domain	1	42	42	24	3.4e-05	1	CL0001	sp|Q07954|LRP1_HUMAN Prolow-density lipoprotein receptor-related protein 1 OS=Homo sapiens OX=9606 GN=LRP1 PE=1 SV=2
308	Q07954	615	657	614	657	PF00058.18	Ldl_recept_b	Repeat	2	42	42	22.1	0.00016	1	CL0186	sp|Q07954|LRP1_HUMAN Prolow-density lipoprotein receptor-related protein 1 OS=Homo sapiens OX=9606 GN=LRP1 PE=1 SV=2
309	Q07954	662	708	660	708	PF00058.18	Ldl_recept_b	Repeat	3	42	42	24.6	2.6e-05	1	CL0186	sp|Q07954|LRP1_HUMAN Prolow-density lipoprotein receptor-related protein 1 OS=Homo sapiens OX=9606 GN=LRP1 PE=1 SV=2
310	Q07954	807	842	807	842	PF14670.7	FXa_inhibition	Domain	1	36	36	40.4	2.6e-10	1	CL0001	sp|Q07954|LRP1_HUMAN Prolow-density lipoprotein receptor-related protein 1 OS=Homo sapiens OX=9606 GN=LRP1 PE=1 SV=2
311	Q07954	853	886	852	890	PF00057.19	Ldl_recept_a	Repeat	2	35	37	45.3	7.2e-12	1	No_clan	sp|Q07954|LRP1_HUMAN Prolow-density lipoprotein receptor-related protein 1 OS=Homo sapiens OX=9606 GN=LRP1 PE=1 SV=2
312	Q07954	894	931	893	931	PF00057.19	Ldl_recept_a	Repeat	2	37	37	38.3	1.2e-09	1	No_clan	sp|Q07954|LRP1_HUMAN Prolow-density lipoprotein receptor-related protein 1 OS=Homo sapiens OX=9606 GN=LRP1 PE=1 SV=2
313	Q07954	934	971	934	971	PF00057.19	Ldl_recept_a	Repeat	1	37	37	44.3	1.6e-11	1	No_clan	sp|Q07954|LRP1_HUMAN Prolow-density lipoprotein receptor-related protein 1 OS=Homo sapiens OX=9606 GN=LRP1 PE=1 SV=2
314	Q07954	976	1011	974	1011	PF00057.19	Ldl_recept_a	Repeat	3	37	37	41.5	1.1e-10	1	No_clan	sp|Q07954|LRP1_HUMAN Prolow-density lipoprotein receptor-related protein 1 OS=Homo sapiens OX=9606 GN=LRP1 PE=1 SV=2
315	Q07954	1014	1051	1013	1051	PF00057.19	Ldl_recept_a	Repeat	2	37	37	45.8	5.1e-12	1	No_clan	sp|Q07954|LRP1_HUMAN Prolow-density lipoprotein receptor-related protein 1 OS=Homo sapiens OX=9606 GN=LRP1 PE=1 SV=2
316	Q07954	1062	1097	1060	1097	PF00057.19	Ldl_recept_a	Repeat	3	37	37	39.9	3.6e-10	1	No_clan	sp|Q07954|LRP1_HUMAN Prolow-density lipoprotein receptor-related protein 1 OS=Homo sapiens OX=9606 GN=LRP1 PE=1 SV=2
317	Q07954	1104	1140	1102	1140	PF00057.19	Ldl_recept_a	Repeat	3	37	37	36.4	4.5e-09	1	No_clan	sp|Q07954|LRP1_HUMAN Prolow-density lipoprotein receptor-related protein 1 OS=Homo sapiens OX=9606 GN=LRP1 PE=1 SV=2
318	Q07954	1185	1221	1185	1221	PF14670.7	FXa_inhibition	Domain	1	36	36	38.3	1.2e-09	1	CL0001	sp|Q07954|LRP1_HUMAN Prolow-density lipoprotein receptor-related protein 1 OS=Homo sapiens OX=9606 GN=LRP1 PE=1 SV=2
319	Q07954	1356	1396	1356	1396	PF00058.18	Ldl_recept_b	Repeat	1	42	42	38.7	1e-09	1	CL0186	sp|Q07954|LRP1_HUMAN Prolow-density lipoprotein receptor-related protein 1 OS=Homo sapiens OX=9606 GN=LRP1 PE=1 SV=2
320	Q07954	1401	1443	1399	1443	PF00058.18	Ldl_recept_b	Repeat	3	42	42	26	9.6e-06	1	CL0186	sp|Q07954|LRP1_HUMAN Prolow-density lipoprotein receptor-related protein 1 OS=Homo sapiens OX=9606 GN=LRP1 PE=1 SV=2
321	Q07954	1627	1667	1627	1667	PF00058.18	Ldl_recept_b	Repeat	1	42	42	28.4	1.7e-06	1	CL0186	sp|Q07954|LRP1_HUMAN Prolow-density lipoprotein receptor-related protein 1 OS=Homo sapiens OX=9606 GN=LRP1 PE=1 SV=2
322	Q07954	1977	2017	1977	2017	PF00058.18	Ldl_recept_b	Repeat	1	42	42	37.3	2.9e-09	1	CL0186	sp|Q07954|LRP1_HUMAN Prolow-density lipoprotein receptor-related protein 1 OS=Homo sapiens OX=9606 GN=LRP1 PE=1 SV=2
323	Q07954	2020	2061	2020	2061	PF00058.18	Ldl_recept_b	Repeat	1	42	42	35.7	8.8e-09	1	CL0186	sp|Q07954|LRP1_HUMAN Prolow-density lipoprotein receptor-related protein 1 OS=Homo sapiens OX=9606 GN=LRP1 PE=1 SV=2
324	Q07954	2344	2386	2344	2386	PF00058.18	Ldl_recept_b	Repeat	1	42	42	43.6	3.1e-11	1	CL0186	sp|Q07954|LRP1_HUMAN Prolow-density lipoprotein receptor-related protein 1 OS=Homo sapiens OX=9606 GN=LRP1 PE=1 SV=2
325	Q07954	2389	2428	2389	2428	PF00058.18	Ldl_recept_b	Repeat	1	41	42	25.1	1.9e-05	1	CL0186	sp|Q07954|LRP1_HUMAN Prolow-density lipoprotein receptor-related protein 1 OS=Homo sapiens OX=9606 GN=LRP1 PE=1 SV=2
326	Q07954	2523	2557	2522	2561	PF00057.19	Ldl_recept_a	Repeat	2	35	37	32.7	6.3e-08	1	No_clan	sp|Q07954|LRP1_HUMAN Prolow-density lipoprotein receptor-related protein 1 OS=Homo sapiens OX=9606 GN=LRP1 PE=1 SV=2
327	Q07954	2565	2600	2564	2600	PF00057.19	Ldl_recept_a	Repeat	2	37	37	31.2	1.9e-07	1	No_clan	sp|Q07954|LRP1_HUMAN Prolow-density lipoprotein receptor-related protein 1 OS=Homo sapiens OX=9606 GN=LRP1 PE=1 SV=2
328	Q07954	2604	2639	2603	2639	PF00057.19	Ldl_recept_a	Repeat	2	37	37	35.1	1.2e-08	1	No_clan	sp|Q07954|LRP1_HUMAN Prolow-density lipoprotein receptor-related protein 1 OS=Homo sapiens OX=9606 GN=LRP1 PE=1 SV=2
329	Q07954	2660	2688	2657	2688	PF00057.19	Ldl_recept_a	Repeat	10	37	37	27.5	2.6e-06	1	No_clan	sp|Q07954|LRP1_HUMAN Prolow-density lipoprotein receptor-related protein 1 OS=Homo sapiens OX=9606 GN=LRP1 PE=1 SV=2
330	Q07954	2695	2730	2694	2730	PF00057.19	Ldl_recept_a	Repeat	2	37	37	39.9	3.7e-10	1	No_clan	sp|Q07954|LRP1_HUMAN Prolow-density lipoprotein receptor-related protein 1 OS=Homo sapiens OX=9606 GN=LRP1 PE=1 SV=2
331	Q07954	2734	2769	2732	2769	PF00057.19	Ldl_recept_a	Repeat	3	37	37	41.5	1.2e-10	1	No_clan	sp|Q07954|LRP1_HUMAN Prolow-density lipoprotein receptor-related protein 1 OS=Homo sapiens OX=9606 GN=LRP1 PE=1 SV=2
332	Q07954	2772	2812	2772	2812	PF00057.19	Ldl_recept_a	Repeat	1	37	37	38.7	8.5e-10	1	No_clan	sp|Q07954|LRP1_HUMAN Prolow-density lipoprotein receptor-related protein 1 OS=Homo sapiens OX=9606 GN=LRP1 PE=1 SV=2
333	Q07954	2816	2853	2816	2853	PF00057.19	Ldl_recept_a	Repeat	1	37	37	38.5	9.9e-10	1	No_clan	sp|Q07954|LRP1_HUMAN Prolow-density lipoprotein receptor-related protein 1 OS=Homo sapiens OX=9606 GN=LRP1 PE=1 SV=2
334	Q07954	2857	2891	2856	2897	PF00057.19	Ldl_recept_a	Repeat	2	35	37	40.3	2.8e-10	1	No_clan	sp|Q07954|LRP1_HUMAN Prolow-density lipoprotein receptor-related protein 1 OS=Homo sapiens OX=9606 GN=LRP1 PE=1 SV=2
335	Q07954	2903	2939	2902	2939	PF00057.19	Ldl_recept_a	Repeat	2	37	37	33.9	2.8e-08	1	No_clan	sp|Q07954|LRP1_HUMAN Prolow-density lipoprotein receptor-related protein 1 OS=Homo sapiens OX=9606 GN=LRP1 PE=1 SV=2
336	Q07954	2962	2985	2962	2985	PF12662.8	cEGF	Domain	1	24	24	35.1	9e-09	1	CL0001	sp|Q07954|LRP1_HUMAN Prolow-density lipoprotein receptor-related protein 1 OS=Homo sapiens OX=9606 GN=LRP1 PE=1 SV=2
337	Q07954	3032	3251	3022	3258	PF16472.6	DUF5050	Domain	73	274	282	42.4	4.9e-11	1	CL0186	sp|Q07954|LRP1_HUMAN Prolow-density lipoprotein receptor-related protein 1 OS=Homo sapiens OX=9606 GN=LRP1 PE=1 SV=2
338	Q07954	3294	3330	3294	3330	PF14670.7	FXa_inhibition	Domain	1	36	36	40.4	2.7e-10	1	CL0001	sp|Q07954|LRP1_HUMAN Prolow-density lipoprotein receptor-related protein 1 OS=Homo sapiens OX=9606 GN=LRP1 PE=1 SV=2
339	Q07954	3333	3369	3332	3369	PF00057.19	Ldl_recept_a	Repeat	2	37	37	32.5	7.5e-08	1	No_clan	sp|Q07954|LRP1_HUMAN Prolow-density lipoprotein receptor-related protein 1 OS=Homo sapiens OX=9606 GN=LRP1 PE=1 SV=2
340	Q07954	3373	3408	3372	3408	PF00057.19	Ldl_recept_a	Repeat	2	37	37	37.4	2.2e-09	1	No_clan	sp|Q07954|LRP1_HUMAN Prolow-density lipoprotein receptor-related protein 1 OS=Homo sapiens OX=9606 GN=LRP1 PE=1 SV=2
341	Q07954	3413	3448	3411	3448	PF00057.19	Ldl_recept_a	Repeat	3	37	37	33.6	3.4e-08	1	No_clan	sp|Q07954|LRP1_HUMAN Prolow-density lipoprotein receptor-related protein 1 OS=Homo sapiens OX=9606 GN=LRP1 PE=1 SV=2
342	Q07954	3452	3489	3451	3489	PF00057.19	Ldl_recept_a	Repeat	2	37	37	47.3	1.7e-12	1	No_clan	sp|Q07954|LRP1_HUMAN Prolow-density lipoprotein receptor-related protein 1 OS=Homo sapiens OX=9606 GN=LRP1 PE=1 SV=2
343	Q07954	3493	3531	3492	3531	PF00057.19	Ldl_recept_a	Repeat	2	37	37	42.1	7.4e-11	1	No_clan	sp|Q07954|LRP1_HUMAN Prolow-density lipoprotein receptor-related protein 1 OS=Homo sapiens OX=9606 GN=LRP1 PE=1 SV=2
344	Q07954	3534	3570	3534	3570	PF00057.19	Ldl_recept_a	Repeat	1	37	37	43.2	3.3e-11	1	No_clan	sp|Q07954|LRP1_HUMAN Prolow-density lipoprotein receptor-related protein 1 OS=Homo sapiens OX=9606 GN=LRP1 PE=1 SV=2
345	Q07954	3574	3609	3573	3609	PF00057.19	Ldl_recept_a	Repeat	2	37	37	47.2	1.8e-12	1	No_clan	sp|Q07954|LRP1_HUMAN Prolow-density lipoprotein receptor-related protein 1 OS=Homo sapiens OX=9606 GN=LRP1 PE=1 SV=2
346	Q07954	3612	3647	3611	3647	PF00057.19	Ldl_recept_a	Repeat	2	37	37	45.6	6.1e-12	1	No_clan	sp|Q07954|LRP1_HUMAN Prolow-density lipoprotein receptor-related protein 1 OS=Homo sapiens OX=9606 GN=LRP1 PE=1 SV=2
347	Q07954	3652	3690	3652	3690	PF00057.19	Ldl_recept_a	Repeat	1	37	37	35.9	6.7e-09	1	No_clan	sp|Q07954|LRP1_HUMAN Prolow-density lipoprotein receptor-related protein 1 OS=Homo sapiens OX=9606 GN=LRP1 PE=1 SV=2
348	Q07954	3740	3776	3739	3776	PF00057.19	Ldl_recept_a	Repeat	2	37	37	29	8.9e-07	1	No_clan	sp|Q07954|LRP1_HUMAN Prolow-density lipoprotein receptor-related protein 1 OS=Homo sapiens OX=9606 GN=LRP1 PE=1 SV=2
349	Q07954	3824	3860	3824	3861	PF07645.16	EGF_CA	Domain	1	42	42	16.8	0.0061	1	CL0001	sp|Q07954|LRP1_HUMAN Prolow-density lipoprotein receptor-related protein 1 OS=Homo sapiens OX=9606 GN=LRP1 PE=1 SV=2
350	Q07954	3970	4010	3970	4010	PF00058.18	Ldl_recept_b	Repeat	1	42	42	38	1.7e-09	1	CL0186	sp|Q07954|LRP1_HUMAN Prolow-density lipoprotein receptor-related protein 1 OS=Homo sapiens OX=9606 GN=LRP1 PE=1 SV=2
351	Q07954	4013	4054	4013	4054	PF00058.18	Ldl_recept_b	Repeat	1	42	42	52.5	5.1e-14	1	CL0186	sp|Q07954|LRP1_HUMAN Prolow-density lipoprotein receptor-related protein 1 OS=Homo sapiens OX=9606 GN=LRP1 PE=1 SV=2
352	Q07954	4058	4095	4057	4099	PF00058.18	Ldl_recept_b	Repeat	2	38	42	21.1	0.00033	1	CL0186	sp|Q07954|LRP1_HUMAN Prolow-density lipoprotein receptor-related protein 1 OS=Homo sapiens OX=9606 GN=LRP1 PE=1 SV=2
353	P98164	27	62	26	62	PF00057.19	Ldl_recept_a	Repeat	2	37	37	37.3	2.4e-09	1	No_clan	sp|P98164|LRP2_HUMAN Low-density lipoprotein receptor-related protein 2 OS=Homo sapiens OX=9606 GN=LRP2 PE=1 SV=3
354	P98164	66	103	65	103	PF00057.19	Ldl_recept_a	Repeat	2	37	37	41.2	1.4e-10	1	No_clan	sp|P98164|LRP2_HUMAN Low-density lipoprotein receptor-related protein 2 OS=Homo sapiens OX=9606 GN=LRP2 PE=1 SV=3
355	P98164	106	142	106	142	PF00057.19	Ldl_recept_a	Repeat	1	37	37	35.4	9.6e-09	1	No_clan	sp|P98164|LRP2_HUMAN Low-density lipoprotein receptor-related protein 2 OS=Homo sapiens OX=9606 GN=LRP2 PE=1 SV=3
356	P98164	183	217	181	217	PF00057.19	Ldl_recept_a	Repeat	3	37	37	45.1	8.4e-12	1	No_clan	sp|P98164|LRP2_HUMAN Low-density lipoprotein receptor-related protein 2 OS=Homo sapiens OX=9606 GN=LRP2 PE=1 SV=3
357	P98164	221	256	220	256	PF00057.19	Ldl_recept_a	Repeat	2	37	37	38.9	7.6e-10	1	No_clan	sp|P98164|LRP2_HUMAN Low-density lipoprotein receptor-related protein 2 OS=Homo sapiens OX=9606 GN=LRP2 PE=1 SV=3
358	P98164	265	300	264	301	PF00057.19	Ldl_recept_a	Repeat	2	36	37	25	1.6e-05	1	No_clan	sp|P98164|LRP2_HUMAN Low-density lipoprotein receptor-related protein 2 OS=Homo sapiens OX=9606 GN=LRP2 PE=1 SV=3
359	P98164	484	519	479	519	PF00058.18	Ldl_recept_b	Repeat	6	42	42	27.9	2.5e-06	1	CL0186	sp|P98164|LRP2_HUMAN Low-density lipoprotein receptor-related protein 2 OS=Homo sapiens OX=9606 GN=LRP2 PE=1 SV=3
360	P98164	522	565	522	566	PF00058.18	Ldl_recept_b	Repeat	1	41	42	23.7	5.1e-05	1	CL0186	sp|P98164|LRP2_HUMAN Low-density lipoprotein receptor-related protein 2 OS=Homo sapiens OX=9606 GN=LRP2 PE=1 SV=3
361	P98164	838	879	838	879	PF00058.18	Ldl_recept_b	Repeat	1	42	42	31.3	2.1e-07	1	CL0186	sp|P98164|LRP2_HUMAN Low-density lipoprotein receptor-related protein 2 OS=Homo sapiens OX=9606 GN=LRP2 PE=1 SV=3
362	P98164	1025	1060	1024	1060	PF00057.19	Ldl_recept_a	Repeat	2	37	37	37.8	1.6e-09	1	No_clan	sp|P98164|LRP2_HUMAN Low-density lipoprotein receptor-related protein 2 OS=Homo sapiens OX=9606 GN=LRP2 PE=1 SV=3
363	P98164	1065	1101	1065	1101	PF00057.19	Ldl_recept_a	Repeat	1	37	37	46.2	3.9e-12	1	No_clan	sp|P98164|LRP2_HUMAN Low-density lipoprotein receptor-related protein 2 OS=Homo sapiens OX=9606 GN=LRP2 PE=1 SV=3
364	P98164	1108	1143	1107	1143	PF00057.19	Ldl_recept_a	Repeat	2	37	37	36.6	3.8e-09	1	No_clan	sp|P98164|LRP2_HUMAN Low-density lipoprotein receptor-related protein 2 OS=Homo sapiens OX=9606 GN=LRP2 PE=1 SV=3
365	P98164	1148	1183	1147	1183	PF00057.19	Ldl_recept_a	Repeat	2	37	37	44.2	1.7e-11	1	No_clan	sp|P98164|LRP2_HUMAN Low-density lipoprotein receptor-related protein 2 OS=Homo sapiens OX=9606 GN=LRP2 PE=1 SV=3
366	P98164	1186	1222	1185	1222	PF00057.19	Ldl_recept_a	Repeat	2	37	37	31.6	1.5e-07	1	No_clan	sp|P98164|LRP2_HUMAN Low-density lipoprotein receptor-related protein 2 OS=Homo sapiens OX=9606 GN=LRP2 PE=1 SV=3
367	P98164	1230	1266	1228	1266	PF00057.19	Ldl_recept_a	Repeat	3	37	37	35.1	1.1e-08	1	No_clan	sp|P98164|LRP2_HUMAN Low-density lipoprotein receptor-related protein 2 OS=Homo sapiens OX=9606 GN=LRP2 PE=1 SV=3
368	P98164	1269	1305	1269	1305	PF00057.19	Ldl_recept_a	Repeat	1	37	37	43.4	2.8e-11	1	No_clan	sp|P98164|LRP2_HUMAN Low-density lipoprotein receptor-related protein 2 OS=Homo sapiens OX=9606 GN=LRP2 PE=1 SV=3
369	P98164	1390	1428	1390	1428	PF07645.16	EGF_CA	Domain	1	42	42	28.7	1.1e-06	1	CL0001	sp|P98164|LRP2_HUMAN Low-density lipoprotein receptor-related protein 2 OS=Homo sapiens OX=9606 GN=LRP2 PE=1 SV=3
370	P98164	1521	1561	1521	1561	PF00058.18	Ldl_recept_b	Repeat	1	42	42	42.6	6.1e-11	1	CL0186	sp|P98164|LRP2_HUMAN Low-density lipoprotein receptor-related protein 2 OS=Homo sapiens OX=9606 GN=LRP2 PE=1 SV=3
371	P98164	1567	1607	1566	1607	PF00058.18	Ldl_recept_b	Repeat	2	42	42	34.5	2.2e-08	1	CL0186	sp|P98164|LRP2_HUMAN Low-density lipoprotein receptor-related protein 2 OS=Homo sapiens OX=9606 GN=LRP2 PE=1 SV=3
372	P98164	1883	1928	1883	1928	PF00058.18	Ldl_recept_b	Repeat	1	42	42	39.8	4.6e-10	1	CL0186	sp|P98164|LRP2_HUMAN Low-density lipoprotein receptor-related protein 2 OS=Homo sapiens OX=9606 GN=LRP2 PE=1 SV=3
373	P98164	2022	2058	2022	2058	PF14670.7	FXa_inhibition	Domain	1	36	36	37.4	2.3e-09	1	CL0001	sp|P98164|LRP2_HUMAN Low-density lipoprotein receptor-related protein 2 OS=Homo sapiens OX=9606 GN=LRP2 PE=1 SV=3
374	P98164	2202	2242	2202	2243	PF00058.18	Ldl_recept_b	Repeat	1	41	42	23.6	5.3e-05	1	CL0186	sp|P98164|LRP2_HUMAN Low-density lipoprotein receptor-related protein 2 OS=Homo sapiens OX=9606 GN=LRP2 PE=1 SV=3
375	P98164	2519	2560	2519	2560	PF00058.18	Ldl_recept_b	Repeat	1	42	42	27.9	2.4e-06	1	CL0186	sp|P98164|LRP2_HUMAN Low-density lipoprotein receptor-related protein 2 OS=Homo sapiens OX=9606 GN=LRP2 PE=1 SV=3
376	P98164	2564	2601	2563	2601	PF00058.18	Ldl_recept_b	Repeat	2	41	42	21.5	0.00024	1	CL0186	sp|P98164|LRP2_HUMAN Low-density lipoprotein receptor-related protein 2 OS=Homo sapiens OX=9606 GN=LRP2 PE=1 SV=3
377	P98164	2699	2733	2698	2736	PF00057.19	Ldl_recept_a	Repeat	2	35	37	38.5	1e-09	1	No_clan	sp|P98164|LRP2_HUMAN Low-density lipoprotein receptor-related protein 2 OS=Homo sapiens OX=9606 GN=LRP2 PE=1 SV=3
378	P98164	2740	2775	2739	2775	PF00057.19	Ldl_recept_a	Repeat	2	37	37	45	9.2e-12	1	No_clan	sp|P98164|LRP2_HUMAN Low-density lipoprotein receptor-related protein 2 OS=Homo sapiens OX=9606 GN=LRP2 PE=1 SV=3
379	P98164	2779	2817	2778	2817	PF00057.19	Ldl_recept_a	Repeat	2	37	37	26.9	4.1e-06	1	No_clan	sp|P98164|LRP2_HUMAN Low-density lipoprotein receptor-related protein 2 OS=Homo sapiens OX=9606 GN=LRP2 PE=1 SV=3
380	P98164	2820	2855	2820	2859	PF00057.19	Ldl_recept_a	Repeat	1	35	37	35.8	7e-09	1	No_clan	sp|P98164|LRP2_HUMAN Low-density lipoprotein receptor-related protein 2 OS=Homo sapiens OX=9606 GN=LRP2 PE=1 SV=3
381	P98164	2863	2899	2862	2899	PF00057.19	Ldl_recept_a	Repeat	2	37	37	46.7	2.8e-12	1	No_clan	sp|P98164|LRP2_HUMAN Low-density lipoprotein receptor-related protein 2 OS=Homo sapiens OX=9606 GN=LRP2 PE=1 SV=3
382	P98164	2904	2943	2904	2943	PF00057.19	Ldl_recept_a	Repeat	1	37	37	42.6	5.3e-11	1	No_clan	sp|P98164|LRP2_HUMAN Low-density lipoprotein receptor-related protein 2 OS=Homo sapiens OX=9606 GN=LRP2 PE=1 SV=3
383	P98164	2947	2988	2946	2988	PF00057.19	Ldl_recept_a	Repeat	2	37	37	32.1	9.8e-08	1	No_clan	sp|P98164|LRP2_HUMAN Low-density lipoprotein receptor-related protein 2 OS=Homo sapiens OX=9606 GN=LRP2 PE=1 SV=3
384	P98164	2991	3027	2991	3027	PF00057.19	Ldl_recept_a	Repeat	1	37	37	42.2	6.9e-11	1	No_clan	sp|P98164|LRP2_HUMAN Low-density lipoprotein receptor-related protein 2 OS=Homo sapiens OX=9606 GN=LRP2 PE=1 SV=3
385	P98164	3030	3063	3030	3068	PF00057.19	Ldl_recept_a	Repeat	1	34	37	44.1	1.8e-11	1	No_clan	sp|P98164|LRP2_HUMAN Low-density lipoprotein receptor-related protein 2 OS=Homo sapiens OX=9606 GN=LRP2 PE=1 SV=3
386	P98164	3074	3109	3073	3109	PF00057.19	Ldl_recept_a	Repeat	2	37	37	41.4	1.2e-10	1	No_clan	sp|P98164|LRP2_HUMAN Low-density lipoprotein receptor-related protein 2 OS=Homo sapiens OX=9606 GN=LRP2 PE=1 SV=3
387	P98164	3132	3155	3132	3155	PF12662.8	cEGF	Domain	1	24	24	40	2.7e-10	1	CL0001	sp|P98164|LRP2_HUMAN Low-density lipoprotein receptor-related protein 2 OS=Homo sapiens OX=9606 GN=LRP2 PE=1 SV=3
388	P98164	3282	3330	3282	3330	PF00058.18	Ldl_recept_b	Repeat	1	42	42	53.3	2.9e-14	1	CL0186	sp|P98164|LRP2_HUMAN Low-density lipoprotein receptor-related protein 2 OS=Homo sapiens OX=9606 GN=LRP2 PE=1 SV=3
389	P98164	3333	3374	3333	3374	PF00058.18	Ldl_recept_b	Repeat	1	42	42	40.1	3.8e-10	1	CL0186	sp|P98164|LRP2_HUMAN Low-density lipoprotein receptor-related protein 2 OS=Homo sapiens OX=9606 GN=LRP2 PE=1 SV=3
390	P98164	3378	3416	3377	3417	PF00058.18	Ldl_recept_b	Repeat	2	41	42	29.1	1.1e-06	1	CL0186	sp|P98164|LRP2_HUMAN Low-density lipoprotein receptor-related protein 2 OS=Homo sapiens OX=9606 GN=LRP2 PE=1 SV=3
391	P98164	3512	3548	3510	3548	PF00057.19	Ldl_recept_a	Repeat	3	37	37	40.8	1.9e-10	1	No_clan	sp|P98164|LRP2_HUMAN Low-density lipoprotein receptor-related protein 2 OS=Homo sapiens OX=9606 GN=LRP2 PE=1 SV=3
392	P98164	3553	3585	3551	3589	PF00057.19	Ldl_recept_a	Repeat	3	35	37	26.1	7.3e-06	1	No_clan	sp|P98164|LRP2_HUMAN Low-density lipoprotein receptor-related protein 2 OS=Homo sapiens OX=9606 GN=LRP2 PE=1 SV=3
393	P98164	3593	3630	3592	3630	PF00057.19	Ldl_recept_a	Repeat	2	37	37	33.1	4.7e-08	1	No_clan	sp|P98164|LRP2_HUMAN Low-density lipoprotein receptor-related protein 2 OS=Homo sapiens OX=9606 GN=LRP2 PE=1 SV=3
394	P98164	3633	3671	3633	3671	PF00057.19	Ldl_recept_a	Repeat	1	37	37	45.5	6.4e-12	1	No_clan	sp|P98164|LRP2_HUMAN Low-density lipoprotein receptor-related protein 2 OS=Homo sapiens OX=9606 GN=LRP2 PE=1 SV=3
395	P98164	3678	3714	3676	3714	PF00057.19	Ldl_recept_a	Repeat	3	37	37	30.7	2.8e-07	1	No_clan	sp|P98164|LRP2_HUMAN Low-density lipoprotein receptor-related protein 2 OS=Homo sapiens OX=9606 GN=LRP2 PE=1 SV=3
396	P98164	3718	3754	3717	3754	PF00057.19	Ldl_recept_a	Repeat	2	37	37	43.6	2.6e-11	1	No_clan	sp|P98164|LRP2_HUMAN Low-density lipoprotein receptor-related protein 2 OS=Homo sapiens OX=9606 GN=LRP2 PE=1 SV=3
397	P98164	3758	3793	3757	3793	PF00057.19	Ldl_recept_a	Repeat	2	37	37	37.1	2.7e-09	1	No_clan	sp|P98164|LRP2_HUMAN Low-density lipoprotein receptor-related protein 2 OS=Homo sapiens OX=9606 GN=LRP2 PE=1 SV=3
398	P98164	3796	3832	3796	3832	PF00057.19	Ldl_recept_a	Repeat	1	37	37	42.5	5.5e-11	1	No_clan	sp|P98164|LRP2_HUMAN Low-density lipoprotein receptor-related protein 2 OS=Homo sapiens OX=9606 GN=LRP2 PE=1 SV=3
399	P98164	3842	3874	3840	3878	PF00057.19	Ldl_recept_a	Repeat	3	35	37	40.8	1.9e-10	1	No_clan	sp|P98164|LRP2_HUMAN Low-density lipoprotein receptor-related protein 2 OS=Homo sapiens OX=9606 GN=LRP2 PE=1 SV=3
400	P98164	3883	3920	3881	3920	PF00057.19	Ldl_recept_a	Repeat	3	37	37	29.5	6.6e-07	1	No_clan	sp|P98164|LRP2_HUMAN Low-density lipoprotein receptor-related protein 2 OS=Homo sapiens OX=9606 GN=LRP2 PE=1 SV=3
401	P98164	3927	3962	3926	3962	PF00057.19	Ldl_recept_a	Repeat	2	37	37	36	5.9e-09	1	No_clan	sp|P98164|LRP2_HUMAN Low-density lipoprotein receptor-related protein 2 OS=Homo sapiens OX=9606 GN=LRP2 PE=1 SV=3
402	P98164	4007	4047	4007	4047	PF07645.16	EGF_CA	Domain	1	42	42	30.9	2.3e-07	1	CL0001	sp|P98164|LRP2_HUMAN Low-density lipoprotein receptor-related protein 2 OS=Homo sapiens OX=9606 GN=LRP2 PE=1 SV=3
403	P98164	4154	4192	4154	4194	PF00058.18	Ldl_recept_b	Repeat	1	40	42	34.3	2.5e-08	1	CL0186	sp|P98164|LRP2_HUMAN Low-density lipoprotein receptor-related protein 2 OS=Homo sapiens OX=9606 GN=LRP2 PE=1 SV=3
404	P98164	4197	4238	4197	4238	PF00058.18	Ldl_recept_b	Repeat	1	42	42	37.8	1.9e-09	1	CL0186	sp|P98164|LRP2_HUMAN Low-density lipoprotein receptor-related protein 2 OS=Homo sapiens OX=9606 GN=LRP2 PE=1 SV=3
405	P98088	81	218	81	226	PF00094.26	VWD	Family	1	147	157	92.8	2.6e-26	1	No_clan	sp|P98088|MUC5A_HUMAN Mucin-5AC OS=Homo sapiens OX=9606 GN=MUC5AC PE=1 SV=4
406	P98088	266	334	265	334	PF08742.12	C8	Domain	2	69	69	49.2	5.2e-13	1	No_clan	sp|P98088|MUC5A_HUMAN Mucin-5AC OS=Homo sapiens OX=9606 GN=MUC5AC PE=1 SV=4
407	P98088	338	394	338	394	PF01826.18	TIL	Domain	1	55	55	44.8	1.1e-11	1	No_clan	sp|P98088|MUC5A_HUMAN Mucin-5AC OS=Homo sapiens OX=9606 GN=MUC5AC PE=1 SV=4
408	P98088	434	587	434	588	PF00094.26	VWD	Family	1	156	157	110.4	1e-31	1	No_clan	sp|P98088|MUC5A_HUMAN Mucin-5AC OS=Homo sapiens OX=9606 GN=MUC5AC PE=1 SV=4
409	P98088	630	694	630	697	PF08742.12	C8	Domain	1	65	69	67.7	9e-19	1	No_clan	sp|P98088|MUC5A_HUMAN Mucin-5AC OS=Homo sapiens OX=9606 GN=MUC5AC PE=1 SV=4
410	P98088	704	761	704	761	PF01826.18	TIL	Domain	1	55	55	28.7	1.2e-06	1	No_clan	sp|P98088|MUC5A_HUMAN Mucin-5AC OS=Homo sapiens OX=9606 GN=MUC5AC PE=1 SV=4
411	P98088	903	1051	903	1053	PF00094.26	VWD	Family	1	155	157	104.9	4.9e-30	1	No_clan	sp|P98088|MUC5A_HUMAN Mucin-5AC OS=Homo sapiens OX=9606 GN=MUC5AC PE=1 SV=4
412	P98088	1094	1161	1094	1161	PF08742.12	C8	Domain	1	69	69	62.2	4.5e-17	1	No_clan	sp|P98088|MUC5A_HUMAN Mucin-5AC OS=Homo sapiens OX=9606 GN=MUC5AC PE=1 SV=4
413	P98088	1389	1475	1389	1475	PF13330.7	Mucin2_WxxW	Family	1	92	92	79.9	2e-22	1	No_clan	sp|P98088|MUC5A_HUMAN Mucin-5AC OS=Homo sapiens OX=9606 GN=MUC5AC PE=1 SV=4
414	P98088	1584	1670	1584	1670	PF13330.7	Mucin2_WxxW	Family	1	92	92	76	3.3e-21	1	No_clan	sp|P98088|MUC5A_HUMAN Mucin-5AC OS=Homo sapiens OX=9606 GN=MUC5AC PE=1 SV=4
415	P98088	1749	1840	1749	1840	PF13330.7	Mucin2_WxxW	Family	1	92	92	79.9	2e-22	1	No_clan	sp|P98088|MUC5A_HUMAN Mucin-5AC OS=Homo sapiens OX=9606 GN=MUC5AC PE=1 SV=4
416	P98088	1957	2043	1957	2043	PF13330.7	Mucin2_WxxW	Family	1	92	92	76	3.3e-21	1	No_clan	sp|P98088|MUC5A_HUMAN Mucin-5AC OS=Homo sapiens OX=9606 GN=MUC5AC PE=1 SV=4
417	P98088	2122	2213	2122	2213	PF13330.7	Mucin2_WxxW	Family	1	92	92	79.3	3.1e-22	1	No_clan	sp|P98088|MUC5A_HUMAN Mucin-5AC OS=Homo sapiens OX=9606 GN=MUC5AC PE=1 SV=4
418	P98088	3228	3319	3228	3319	PF13330.7	Mucin2_WxxW	Family	1	92	92	78.8	4.4e-22	1	No_clan	sp|P98088|MUC5A_HUMAN Mucin-5AC OS=Homo sapiens OX=9606 GN=MUC5AC PE=1 SV=4
419	P98088	3526	3617	3526	3617	PF13330.7	Mucin2_WxxW	Family	1	92	92	79.9	2e-22	1	No_clan	sp|P98088|MUC5A_HUMAN Mucin-5AC OS=Homo sapiens OX=9606 GN=MUC5AC PE=1 SV=4
420	P98088	3959	4050	3959	4050	PF13330.7	Mucin2_WxxW	Family	1	92	92	79.9	2e-22	1	No_clan	sp|P98088|MUC5A_HUMAN Mucin-5AC OS=Homo sapiens OX=9606 GN=MUC5AC PE=1 SV=4
421	P98088	4633	4724	4633	4724	PF13330.7	Mucin2_WxxW	Family	1	92	92	79.7	2.2e-22	1	No_clan	sp|P98088|MUC5A_HUMAN Mucin-5AC OS=Homo sapiens OX=9606 GN=MUC5AC PE=1 SV=4
422	P98088	4921	5080	4921	5080	PF00094.26	VWD	Family	1	157	157	96.2	2.3e-27	1	No_clan	sp|P98088|MUC5A_HUMAN Mucin-5AC OS=Homo sapiens OX=9606 GN=MUC5AC PE=1 SV=4
423	P98088	5146	5208	5146	5212	PF08742.12	C8	Domain	1	67	69	51.5	1e-13	1	No_clan	sp|P98088|MUC5A_HUMAN Mucin-5AC OS=Homo sapiens OX=9606 GN=MUC5AC PE=1 SV=4
424	Q9HC84	77	215	77	224	PF00094.26	VWD	Family	1	148	157	84.2	1.1e-23	1	No_clan	sp|Q9HC84|MUC5B_HUMAN Mucin-5B OS=Homo sapiens OX=9606 GN=MUC5B PE=1 SV=3
425	Q9HC84	267	325	261	325	PF08742.12	C8	Domain	6	69	69	41	1.9e-10	1	No_clan	sp|Q9HC84|MUC5B_HUMAN Mucin-5B OS=Homo sapiens OX=9606 GN=MUC5B PE=1 SV=3
426	Q9HC84	329	385	329	385	PF01826.18	TIL	Domain	1	55	55	43.8	2.2e-11	1	No_clan	sp|Q9HC84|MUC5B_HUMAN Mucin-5B OS=Homo sapiens OX=9606 GN=MUC5B PE=1 SV=3
427	Q9HC84	425	578	425	579	PF00094.26	VWD	Family	1	156	157	103.5	1.3e-29	1	No_clan	sp|Q9HC84|MUC5B_HUMAN Mucin-5B OS=Homo sapiens OX=9606 GN=MUC5B PE=1 SV=3
428	Q9HC84	621	685	621	688	PF08742.12	C8	Domain	1	65	69	66.5	2e-18	1	No_clan	sp|Q9HC84|MUC5B_HUMAN Mucin-5B OS=Homo sapiens OX=9606 GN=MUC5B PE=1 SV=3
429	Q9HC84	695	752	695	752	PF01826.18	TIL	Domain	1	55	55	29.3	7.7e-07	1	No_clan	sp|Q9HC84|MUC5B_HUMAN Mucin-5B OS=Homo sapiens OX=9606 GN=MUC5B PE=1 SV=3
430	Q9HC84	895	1041	895	1043	PF00094.26	VWD	Family	1	155	157	95.5	4e-27	1	No_clan	sp|Q9HC84|MUC5B_HUMAN Mucin-5B OS=Homo sapiens OX=9606 GN=MUC5B PE=1 SV=3
431	Q9HC84	1084	1151	1084	1151	PF08742.12	C8	Domain	1	69	69	59.9	2.3e-16	1	No_clan	sp|Q9HC84|MUC5B_HUMAN Mucin-5B OS=Homo sapiens OX=9606 GN=MUC5B PE=1 SV=3
432	Q9HC84	1340	1426	1340	1426	PF13330.7	Mucin2_WxxW	Family	1	92	92	77.4	1.2e-21	1	No_clan	sp|Q9HC84|MUC5B_HUMAN Mucin-5B OS=Homo sapiens OX=9606 GN=MUC5B PE=1 SV=3
433	Q9HC84	1509	1597	1509	1597	PF13330.7	Mucin2_WxxW	Family	1	92	92	81.5	6.3e-23	1	No_clan	sp|Q9HC84|MUC5B_HUMAN Mucin-5B OS=Homo sapiens OX=9606 GN=MUC5B PE=1 SV=3
434	Q9HC84	1790	1878	1790	1878	PF13330.7	Mucin2_WxxW	Family	1	92	92	80.5	1.3e-22	1	No_clan	sp|Q9HC84|MUC5B_HUMAN Mucin-5B OS=Homo sapiens OX=9606 GN=MUC5B PE=1 SV=3
435	Q9HC84	2320	2408	2320	2408	PF13330.7	Mucin2_WxxW	Family	1	92	92	74.6	9e-21	1	No_clan	sp|Q9HC84|MUC5B_HUMAN Mucin-5B OS=Homo sapiens OX=9606 GN=MUC5B PE=1 SV=3
436	Q9HC84	2877	2965	2877	2965	PF13330.7	Mucin2_WxxW	Family	1	92	92	74.6	9e-21	1	No_clan	sp|Q9HC84|MUC5B_HUMAN Mucin-5B OS=Homo sapiens OX=9606 GN=MUC5B PE=1 SV=3
437	Q9HC84	3577	3665	3577	3665	PF13330.7	Mucin2_WxxW	Family	1	92	92	74.6	9e-21	1	No_clan	sp|Q9HC84|MUC5B_HUMAN Mucin-5B OS=Homo sapiens OX=9606 GN=MUC5B PE=1 SV=3
438	Q9HC84	4134	4222	4134	4222	PF13330.7	Mucin2_WxxW	Family	1	92	92	73.3	2.3e-20	1	No_clan	sp|Q9HC84|MUC5B_HUMAN Mucin-5B OS=Homo sapiens OX=9606 GN=MUC5B PE=1 SV=3
439	Q9HC84	5075	5238	5075	5238	PF00094.26	VWD	Family	1	157	157	111	6.5e-32	1	No_clan	sp|Q9HC84|MUC5B_HUMAN Mucin-5B OS=Homo sapiens OX=9606 GN=MUC5B PE=1 SV=3
440	Q9HC84	5291	5351	5290	5355	PF08742.12	C8	Domain	2	67	69	55.1	7.6e-15	1	No_clan	sp|Q9HC84|MUC5B_HUMAN Mucin-5B OS=Homo sapiens OX=9606 GN=MUC5B PE=1 SV=3
441	Q4LDE5	84	255	83	258	PF00092.29	VWA	Domain	2	172	175	118.1	5.1e-34	1	CL0128	sp|Q4LDE5|SVEP1_HUMAN Sushi, von Willebrand factor type A, EGF and pentraxin domain-containing protein 1 OS=Homo sapiens OX=9606 GN=SVEP1 PE=1 SV=3
442	Q4LDE5	310	360	310	360	PF07699.14	Ephrin_rec_like	Family	1	48	48	44.8	7.6e-12	1	No_clan	sp|Q4LDE5|SVEP1_HUMAN Sushi, von Willebrand factor type A, EGF and pentraxin domain-containing protein 1 OS=Homo sapiens OX=9606 GN=SVEP1 PE=1 SV=3
443	Q4LDE5	378	433	378	433	PF00084.21	Sushi	Domain	1	56	56	27.6	3.3e-06	1	CL0001	sp|Q4LDE5|SVEP1_HUMAN Sushi, von Willebrand factor type A, EGF and pentraxin domain-containing protein 1 OS=Homo sapiens OX=9606 GN=SVEP1 PE=1 SV=3
444	Q4LDE5	438	493	438	493	PF00084.21	Sushi	Domain	1	56	56	43.7	3.1e-11	1	CL0001	sp|Q4LDE5|SVEP1_HUMAN Sushi, von Willebrand factor type A, EGF and pentraxin domain-containing protein 1 OS=Homo sapiens OX=9606 GN=SVEP1 PE=1 SV=3
445	Q4LDE5	514	551	498	559	PF00084.21	Sushi	Domain	14	50	56	17.5	0.0048	1	CL0001	sp|Q4LDE5|SVEP1_HUMAN Sushi, von Willebrand factor type A, EGF and pentraxin domain-containing protein 1 OS=Homo sapiens OX=9606 GN=SVEP1 PE=1 SV=3
446	Q4LDE5	560	642	560	642	PF02494.17	HYR	Domain	1	81	81	56.8	2.2e-15	1	CL0159	sp|Q4LDE5|SVEP1_HUMAN Sushi, von Willebrand factor type A, EGF and pentraxin domain-containing protein 1 OS=Homo sapiens OX=9606 GN=SVEP1 PE=1 SV=3
447	Q4LDE5	644	721	643	722	PF02494.17	HYR	Domain	2	80	81	49.1	5.3e-13	1	CL0159	sp|Q4LDE5|SVEP1_HUMAN Sushi, von Willebrand factor type A, EGF and pentraxin domain-containing protein 1 OS=Homo sapiens OX=9606 GN=SVEP1 PE=1 SV=3
448	Q4LDE5	1005	1052	1005	1052	PF07699.14	Ephrin_rec_like	Family	1	48	48	58.5	4e-16	1	No_clan	sp|Q4LDE5|SVEP1_HUMAN Sushi, von Willebrand factor type A, EGF and pentraxin domain-containing protein 1 OS=Homo sapiens OX=9606 GN=SVEP1 PE=1 SV=3
449	Q4LDE5	1059	1106	1059	1106	PF07699.14	Ephrin_rec_like	Family	1	48	48	57.1	1.1e-15	1	No_clan	sp|Q4LDE5|SVEP1_HUMAN Sushi, von Willebrand factor type A, EGF and pentraxin domain-containing protein 1 OS=Homo sapiens OX=9606 GN=SVEP1 PE=1 SV=3
450	Q4LDE5	1113	1160	1113	1160	PF07699.14	Ephrin_rec_like	Family	1	48	48	57	1.2e-15	1	No_clan	sp|Q4LDE5|SVEP1_HUMAN Sushi, von Willebrand factor type A, EGF and pentraxin domain-containing protein 1 OS=Homo sapiens OX=9606 GN=SVEP1 PE=1 SV=3
451	Q4LDE5	1200	1225	1197	1227	PF00008.28	EGF	Domain	4	30	32	26.2	7.2e-06	1	CL0001	sp|Q4LDE5|SVEP1_HUMAN Sushi, von Willebrand factor type A, EGF and pentraxin domain-containing protein 1 OS=Homo sapiens OX=9606 GN=SVEP1 PE=1 SV=3
452	Q4LDE5	1235	1265	1235	1265	PF00008.28	EGF	Domain	1	32	32	35.6	8.6e-09	1	CL0001	sp|Q4LDE5|SVEP1_HUMAN Sushi, von Willebrand factor type A, EGF and pentraxin domain-containing protein 1 OS=Homo sapiens OX=9606 GN=SVEP1 PE=1 SV=3
453	Q4LDE5	1273	1302	1273	1303	PF00008.28	EGF	Domain	1	31	32	27.3	3.2e-06	1	CL0001	sp|Q4LDE5|SVEP1_HUMAN Sushi, von Willebrand factor type A, EGF and pentraxin domain-containing protein 1 OS=Homo sapiens OX=9606 GN=SVEP1 PE=1 SV=3
454	Q4LDE5	1316	1337	1316	1337	PF12661.8	hEGF	Domain	1	22	22	25.8	1.2e-05	1	CL0001	sp|Q4LDE5|SVEP1_HUMAN Sushi, von Willebrand factor type A, EGF and pentraxin domain-containing protein 1 OS=Homo sapiens OX=9606 GN=SVEP1 PE=1 SV=3
455	Q4LDE5	1349	1379	1349	1379	PF00008.28	EGF	Domain	1	32	32	31.2	2.1e-07	1	CL0001	sp|Q4LDE5|SVEP1_HUMAN Sushi, von Willebrand factor type A, EGF and pentraxin domain-containing protein 1 OS=Homo sapiens OX=9606 GN=SVEP1 PE=1 SV=3
456	Q4LDE5	1387	1417	1387	1417	PF00008.28	EGF	Domain	1	32	32	36.7	3.9e-09	1	CL0001	sp|Q4LDE5|SVEP1_HUMAN Sushi, von Willebrand factor type A, EGF and pentraxin domain-containing protein 1 OS=Homo sapiens OX=9606 GN=SVEP1 PE=1 SV=3
457	Q4LDE5	1441	1620	1429	1623	PF00354.18	Pentaxin	Domain	18	191	194	95.4	3.4e-27	1	CL0004	sp|Q4LDE5|SVEP1_HUMAN Sushi, von Willebrand factor type A, EGF and pentraxin domain-containing protein 1 OS=Homo sapiens OX=9606 GN=SVEP1 PE=1 SV=3
458	Q4LDE5	1628	1685	1628	1685	PF00084.21	Sushi	Domain	1	56	56	40.8	2.4e-10	1	CL0001	sp|Q4LDE5|SVEP1_HUMAN Sushi, von Willebrand factor type A, EGF and pentraxin domain-containing protein 1 OS=Homo sapiens OX=9606 GN=SVEP1 PE=1 SV=3
459	Q4LDE5	1690	1743	1690	1743	PF00084.21	Sushi	Domain	1	56	56	40.8	2.5e-10	1	CL0001	sp|Q4LDE5|SVEP1_HUMAN Sushi, von Willebrand factor type A, EGF and pentraxin domain-containing protein 1 OS=Homo sapiens OX=9606 GN=SVEP1 PE=1 SV=3
460	Q4LDE5	1745	1783	1745	1783	PF07645.16	EGF_CA	Domain	1	42	42	30.5	3.1e-07	1	CL0001	sp|Q4LDE5|SVEP1_HUMAN Sushi, von Willebrand factor type A, EGF and pentraxin domain-containing protein 1 OS=Homo sapiens OX=9606 GN=SVEP1 PE=1 SV=3
461	Q4LDE5	1789	1842	1789	1842	PF00084.21	Sushi	Domain	1	56	56	43.7	3e-11	1	CL0001	sp|Q4LDE5|SVEP1_HUMAN Sushi, von Willebrand factor type A, EGF and pentraxin domain-containing protein 1 OS=Homo sapiens OX=9606 GN=SVEP1 PE=1 SV=3
462	Q4LDE5	1847	1900	1847	1900	PF00084.21	Sushi	Domain	1	56	56	36.1	7.3e-09	1	CL0001	sp|Q4LDE5|SVEP1_HUMAN Sushi, von Willebrand factor type A, EGF and pentraxin domain-containing protein 1 OS=Homo sapiens OX=9606 GN=SVEP1 PE=1 SV=3
463	Q4LDE5	1905	1958	1905	1958	PF00084.21	Sushi	Domain	1	56	56	37.7	2.3e-09	1	CL0001	sp|Q4LDE5|SVEP1_HUMAN Sushi, von Willebrand factor type A, EGF and pentraxin domain-containing protein 1 OS=Homo sapiens OX=9606 GN=SVEP1 PE=1 SV=3
464	Q4LDE5	1963	2016	1963	2016	PF00084.21	Sushi	Domain	1	56	56	44.2	2.2e-11	1	CL0001	sp|Q4LDE5|SVEP1_HUMAN Sushi, von Willebrand factor type A, EGF and pentraxin domain-containing protein 1 OS=Homo sapiens OX=9606 GN=SVEP1 PE=1 SV=3
465	Q4LDE5	2021	2078	2021	2078	PF00084.21	Sushi	Domain	1	56	56	29.8	6.7e-07	1	CL0001	sp|Q4LDE5|SVEP1_HUMAN Sushi, von Willebrand factor type A, EGF and pentraxin domain-containing protein 1 OS=Homo sapiens OX=9606 GN=SVEP1 PE=1 SV=3
466	Q4LDE5	2083	2136	2083	2141	PF00084.21	Sushi	Domain	1	53	56	30.7	3.4e-07	1	CL0001	sp|Q4LDE5|SVEP1_HUMAN Sushi, von Willebrand factor type A, EGF and pentraxin domain-containing protein 1 OS=Homo sapiens OX=9606 GN=SVEP1 PE=1 SV=3
467	Q4LDE5	2146	2199	2146	2199	PF00084.21	Sushi	Domain	1	56	56	48.6	8.8e-13	1	CL0001	sp|Q4LDE5|SVEP1_HUMAN Sushi, von Willebrand factor type A, EGF and pentraxin domain-containing protein 1 OS=Homo sapiens OX=9606 GN=SVEP1 PE=1 SV=3
468	Q4LDE5	2204	2259	2204	2259	PF00084.21	Sushi	Domain	1	56	56	37.9	1.9e-09	1	CL0001	sp|Q4LDE5|SVEP1_HUMAN Sushi, von Willebrand factor type A, EGF and pentraxin domain-containing protein 1 OS=Homo sapiens OX=9606 GN=SVEP1 PE=1 SV=3
469	Q4LDE5	2264	2318	2264	2318	PF00084.21	Sushi	Domain	1	56	56	46	6e-12	1	CL0001	sp|Q4LDE5|SVEP1_HUMAN Sushi, von Willebrand factor type A, EGF and pentraxin domain-containing protein 1 OS=Homo sapiens OX=9606 GN=SVEP1 PE=1 SV=3
470	Q4LDE5	2323	2376	2323	2376	PF00084.21	Sushi	Domain	1	56	56	28.4	1.8e-06	1	CL0001	sp|Q4LDE5|SVEP1_HUMAN Sushi, von Willebrand factor type A, EGF and pentraxin domain-containing protein 1 OS=Homo sapiens OX=9606 GN=SVEP1 PE=1 SV=3
471	Q4LDE5	2381	2435	2381	2435	PF00084.21	Sushi	Domain	1	56	56	39	9e-10	1	CL0001	sp|Q4LDE5|SVEP1_HUMAN Sushi, von Willebrand factor type A, EGF and pentraxin domain-containing protein 1 OS=Homo sapiens OX=9606 GN=SVEP1 PE=1 SV=3
472	Q4LDE5	2440	2493	2440	2493	PF00084.21	Sushi	Domain	1	56	56	36.5	5.5e-09	1	CL0001	sp|Q4LDE5|SVEP1_HUMAN Sushi, von Willebrand factor type A, EGF and pentraxin domain-containing protein 1 OS=Homo sapiens OX=9606 GN=SVEP1 PE=1 SV=3
473	Q4LDE5	2498	2551	2498	2551	PF00084.21	Sushi	Domain	1	56	56	42.6	7e-11	1	CL0001	sp|Q4LDE5|SVEP1_HUMAN Sushi, von Willebrand factor type A, EGF and pentraxin domain-containing protein 1 OS=Homo sapiens OX=9606 GN=SVEP1 PE=1 SV=3
474	Q4LDE5	2556	2608	2556	2608	PF00084.21	Sushi	Domain	1	56	56	37.8	2.2e-09	1	CL0001	sp|Q4LDE5|SVEP1_HUMAN Sushi, von Willebrand factor type A, EGF and pentraxin domain-containing protein 1 OS=Homo sapiens OX=9606 GN=SVEP1 PE=1 SV=3
475	Q4LDE5	2671	2712	2658	2712	PF00084.21	Sushi	Domain	16	56	56	43.2	4.4e-11	1	CL0001	sp|Q4LDE5|SVEP1_HUMAN Sushi, von Willebrand factor type A, EGF and pentraxin domain-containing protein 1 OS=Homo sapiens OX=9606 GN=SVEP1 PE=1 SV=3
476	Q4LDE5	2717	2770	2717	2770	PF00084.21	Sushi	Domain	1	56	56	32.6	9.1e-08	1	CL0001	sp|Q4LDE5|SVEP1_HUMAN Sushi, von Willebrand factor type A, EGF and pentraxin domain-containing protein 1 OS=Homo sapiens OX=9606 GN=SVEP1 PE=1 SV=3
477	Q4LDE5	2775	2828	2775	2828	PF00084.21	Sushi	Domain	1	56	56	42.5	7.4e-11	1	CL0001	sp|Q4LDE5|SVEP1_HUMAN Sushi, von Willebrand factor type A, EGF and pentraxin domain-containing protein 1 OS=Homo sapiens OX=9606 GN=SVEP1 PE=1 SV=3
478	Q4LDE5	2833	2886	2833	2886	PF00084.21	Sushi	Domain	1	56	56	42.3	8.6e-11	1	CL0001	sp|Q4LDE5|SVEP1_HUMAN Sushi, von Willebrand factor type A, EGF and pentraxin domain-containing protein 1 OS=Homo sapiens OX=9606 GN=SVEP1 PE=1 SV=3
479	Q4LDE5	2891	2944	2891	2944	PF00084.21	Sushi	Domain	1	56	56	34.6	2.1e-08	1	CL0001	sp|Q4LDE5|SVEP1_HUMAN Sushi, von Willebrand factor type A, EGF and pentraxin domain-containing protein 1 OS=Homo sapiens OX=9606 GN=SVEP1 PE=1 SV=3
480	Q4LDE5	2949	3002	2949	3002	PF00084.21	Sushi	Domain	1	56	56	34.5	2.3e-08	1	CL0001	sp|Q4LDE5|SVEP1_HUMAN Sushi, von Willebrand factor type A, EGF and pentraxin domain-containing protein 1 OS=Homo sapiens OX=9606 GN=SVEP1 PE=1 SV=3
481	Q4LDE5	3007	3059	3007	3059	PF00084.21	Sushi	Domain	1	56	56	32.4	1.1e-07	1	CL0001	sp|Q4LDE5|SVEP1_HUMAN Sushi, von Willebrand factor type A, EGF and pentraxin domain-containing protein 1 OS=Homo sapiens OX=9606 GN=SVEP1 PE=1 SV=3
482	Q4LDE5	3064	3117	3064	3117	PF00084.21	Sushi	Domain	1	56	56	30.1	5.6e-07	1	CL0001	sp|Q4LDE5|SVEP1_HUMAN Sushi, von Willebrand factor type A, EGF and pentraxin domain-containing protein 1 OS=Homo sapiens OX=9606 GN=SVEP1 PE=1 SV=3
483	Q4LDE5	3122	3172	3122	3176	PF00084.21	Sushi	Domain	1	52	56	31.3	2.4e-07	1	CL0001	sp|Q4LDE5|SVEP1_HUMAN Sushi, von Willebrand factor type A, EGF and pentraxin domain-containing protein 1 OS=Homo sapiens OX=9606 GN=SVEP1 PE=1 SV=3
484	Q4LDE5	3181	3232	3181	3236	PF00084.21	Sushi	Domain	1	54	56	40	4.4e-10	1	CL0001	sp|Q4LDE5|SVEP1_HUMAN Sushi, von Willebrand factor type A, EGF and pentraxin domain-containing protein 1 OS=Homo sapiens OX=9606 GN=SVEP1 PE=1 SV=3
485	Q4LDE5	3241	3294	3241	3294	PF00084.21	Sushi	Domain	1	56	56	42.7	6.6e-11	1	CL0001	sp|Q4LDE5|SVEP1_HUMAN Sushi, von Willebrand factor type A, EGF and pentraxin domain-containing protein 1 OS=Homo sapiens OX=9606 GN=SVEP1 PE=1 SV=3
486	Q4LDE5	3299	3352	3299	3352	PF00084.21	Sushi	Domain	1	56	56	38.8	1e-09	1	CL0001	sp|Q4LDE5|SVEP1_HUMAN Sushi, von Willebrand factor type A, EGF and pentraxin domain-containing protein 1 OS=Homo sapiens OX=9606 GN=SVEP1 PE=1 SV=3
487	Q4LDE5	3357	3411	3357	3411	PF00084.21	Sushi	Domain	1	56	56	28.8	1.3e-06	1	CL0001	sp|Q4LDE5|SVEP1_HUMAN Sushi, von Willebrand factor type A, EGF and pentraxin domain-containing protein 1 OS=Homo sapiens OX=9606 GN=SVEP1 PE=1 SV=3
488	Q4LDE5	3416	3468	3416	3468	PF00084.21	Sushi	Domain	1	56	56	36.6	5.2e-09	1	CL0001	sp|Q4LDE5|SVEP1_HUMAN Sushi, von Willebrand factor type A, EGF and pentraxin domain-containing protein 1 OS=Homo sapiens OX=9606 GN=SVEP1 PE=1 SV=3
489	Q4LDE5	3506	3530	3502	3530	PF00008.28	EGF	Domain	4	32	32	24.9	1.9e-05	1	CL0001	sp|Q4LDE5|SVEP1_HUMAN Sushi, von Willebrand factor type A, EGF and pentraxin domain-containing protein 1 OS=Homo sapiens OX=9606 GN=SVEP1 PE=1 SV=3
490	P46531	63	96	63	97	PF00008.28	EGF	Domain	1	31	32	23.2	6.1e-05	1	CL0001	sp|P46531|NOTC1_HUMAN Neurogenic locus notch homolog protein 1 OS=Homo sapiens OX=9606 GN=NOTCH1 PE=1 SV=4
491	P46531	106	136	106	137	PF00008.28	EGF	Domain	1	31	32	31.4	1.8e-07	1	CL0001	sp|P46531|NOTC1_HUMAN Neurogenic locus notch homolog protein 1 OS=Homo sapiens OX=9606 GN=NOTCH1 PE=1 SV=4
492	P46531	144	174	144	174	PF00008.28	EGF	Domain	1	32	32	25.2	1.5e-05	1	CL0001	sp|P46531|NOTC1_HUMAN Neurogenic locus notch homolog protein 1 OS=Homo sapiens OX=9606 GN=NOTCH1 PE=1 SV=4
493	P46531	178	213	178	219	PF07645.16	EGF_CA	Domain	1	35	42	32	1e-07	1	CL0001	sp|P46531|NOTC1_HUMAN Neurogenic locus notch homolog protein 1 OS=Homo sapiens OX=9606 GN=NOTCH1 PE=1 SV=4
494	P46531	222	252	222	253	PF00008.28	EGF	Domain	1	31	32	28.5	1.4e-06	1	CL0001	sp|P46531|NOTC1_HUMAN Neurogenic locus notch homolog protein 1 OS=Homo sapiens OX=9606 GN=NOTCH1 PE=1 SV=4
495	P46531	261	290	261	291	PF00008.28	EGF	Domain	1	31	32	27.1	3.7e-06	1	CL0001	sp|P46531|NOTC1_HUMAN Neurogenic locus notch homolog protein 1 OS=Homo sapiens OX=9606 GN=NOTCH1 PE=1 SV=4
496	P46531	295	329	295	335	PF07645.16	EGF_CA	Domain	1	36	42	37.5	2e-09	1	CL0001	sp|P46531|NOTC1_HUMAN Neurogenic locus notch homolog protein 1 OS=Homo sapiens OX=9606 GN=NOTCH1 PE=1 SV=4
497	P46531	339	367	339	369	PF00008.28	EGF	Domain	1	30	32	25.9	9.3e-06	1	CL0001	sp|P46531|NOTC1_HUMAN Neurogenic locus notch homolog protein 1 OS=Homo sapiens OX=9606 GN=NOTCH1 PE=1 SV=4
498	P46531	412	445	412	450	PF07645.16	EGF_CA	Domain	1	34	42	42	8.2e-11	1	CL0001	sp|P46531|NOTC1_HUMAN Neurogenic locus notch homolog protein 1 OS=Homo sapiens OX=9606 GN=NOTCH1 PE=1 SV=4
499	P46531	456	485	456	486	PF00008.28	EGF	Domain	1	31	32	28.5	1.3e-06	1	CL0001	sp|P46531|NOTC1_HUMAN Neurogenic locus notch homolog protein 1 OS=Homo sapiens OX=9606 GN=NOTCH1 PE=1 SV=4
500	P46531	494	522	494	524	PF00008.28	EGF	Domain	1	30	32	34	2.7e-08	1	CL0001	sp|P46531|NOTC1_HUMAN Neurogenic locus notch homolog protein 1 OS=Homo sapiens OX=9606 GN=NOTCH1 PE=1 SV=4
501	P46531	532	561	532	562	PF00008.28	EGF	Domain	1	31	32	34.9	1.4e-08	1	CL0001	sp|P46531|NOTC1_HUMAN Neurogenic locus notch homolog protein 1 OS=Homo sapiens OX=9606 GN=NOTCH1 PE=1 SV=4
502	P46531	570	598	570	599	PF00008.28	EGF	Domain	1	31	32	21.7	0.00019	1	CL0001	sp|P46531|NOTC1_HUMAN Neurogenic locus notch homolog protein 1 OS=Homo sapiens OX=9606 GN=NOTCH1 PE=1 SV=4
503	P46531	607	637	607	637	PF00008.28	EGF	Domain	1	32	32	23.5	5.2e-05	1	CL0001	sp|P46531|NOTC1_HUMAN Neurogenic locus notch homolog protein 1 OS=Homo sapiens OX=9606 GN=NOTCH1 PE=1 SV=4
504	P46531	645	673	645	673	PF00008.28	EGF	Domain	1	31	32	22.5	0.00011	1	CL0001	sp|P46531|NOTC1_HUMAN Neurogenic locus notch homolog protein 1 OS=Homo sapiens OX=9606 GN=NOTCH1 PE=1 SV=4
505	P46531	682	711	682	712	PF00008.28	EGF	Domain	1	31	32	28.7	1.2e-06	1	CL0001	sp|P46531|NOTC1_HUMAN Neurogenic locus notch homolog protein 1 OS=Homo sapiens OX=9606 GN=NOTCH1 PE=1 SV=4
506	P46531	720	748	720	749	PF00008.28	EGF	Domain	1	31	32	26.3	6.8e-06	1	CL0001	sp|P46531|NOTC1_HUMAN Neurogenic locus notch homolog protein 1 OS=Homo sapiens OX=9606 GN=NOTCH1 PE=1 SV=4
507	P46531	757	787	757	787	PF00008.28	EGF	Domain	1	32	32	24	3.5e-05	1	CL0001	sp|P46531|NOTC1_HUMAN Neurogenic locus notch homolog protein 1 OS=Homo sapiens OX=9606 GN=NOTCH1 PE=1 SV=4
508	P46531	795	824	795	825	PF00008.28	EGF	Domain	1	31	32	32.3	8.8e-08	1	CL0001	sp|P46531|NOTC1_HUMAN Neurogenic locus notch homolog protein 1 OS=Homo sapiens OX=9606 GN=NOTCH1 PE=1 SV=4
509	P46531	833	864	833	865	PF00008.28	EGF	Domain	1	31	32	22.8	8.3e-05	1	CL0001	sp|P46531|NOTC1_HUMAN Neurogenic locus notch homolog protein 1 OS=Homo sapiens OX=9606 GN=NOTCH1 PE=1 SV=4
510	P46531	869	902	869	906	PF07645.16	EGF_CA	Domain	1	35	42	30.5	3e-07	1	CL0001	sp|P46531|NOTC1_HUMAN Neurogenic locus notch homolog protein 1 OS=Homo sapiens OX=9606 GN=NOTCH1 PE=1 SV=4
511	P46531	911	939	911	941	PF00008.28	EGF	Domain	1	30	32	23.4	5.4e-05	1	CL0001	sp|P46531|NOTC1_HUMAN Neurogenic locus notch homolog protein 1 OS=Homo sapiens OX=9606 GN=NOTCH1 PE=1 SV=4
512	P46531	992	1013	992	1013	PF12661.8	hEGF	Domain	1	22	22	29	1.1e-06	1	CL0001	sp|P46531|NOTC1_HUMAN Neurogenic locus notch homolog protein 1 OS=Homo sapiens OX=9606 GN=NOTCH1 PE=1 SV=4
513	P46531	1025	1055	1025	1055	PF00008.28	EGF	Domain	1	32	32	30.3	3.9e-07	1	CL0001	sp|P46531|NOTC1_HUMAN Neurogenic locus notch homolog protein 1 OS=Homo sapiens OX=9606 GN=NOTCH1 PE=1 SV=4
514	P46531	1063	1092	1063	1093	PF00008.28	EGF	Domain	1	31	32	31.1	2.1e-07	1	CL0001	sp|P46531|NOTC1_HUMAN Neurogenic locus notch homolog protein 1 OS=Homo sapiens OX=9606 GN=NOTCH1 PE=1 SV=4
515	P46531	1116	1141	1111	1141	PF00008.28	EGF	Domain	6	32	32	29.3	7.8e-07	1	CL0001	sp|P46531|NOTC1_HUMAN Neurogenic locus notch homolog protein 1 OS=Homo sapiens OX=9606 GN=NOTCH1 PE=1 SV=4
516	P46531	1149	1178	1149	1179	PF00008.28	EGF	Domain	1	31	32	30.8	2.6e-07	1	CL0001	sp|P46531|NOTC1_HUMAN Neurogenic locus notch homolog protein 1 OS=Homo sapiens OX=9606 GN=NOTCH1 PE=1 SV=4
517	P46531	1187	1215	1187	1217	PF00008.28	EGF	Domain	1	30	32	31.3	1.9e-07	1	CL0001	sp|P46531|NOTC1_HUMAN Neurogenic locus notch homolog protein 1 OS=Homo sapiens OX=9606 GN=NOTCH1 PE=1 SV=4
518	P46531	1236	1263	1225	1263	PF00008.28	EGF	Domain	5	32	32	30.8	2.6e-07	1	CL0001	sp|P46531|NOTC1_HUMAN Neurogenic locus notch homolog protein 1 OS=Homo sapiens OX=9606 GN=NOTCH1 PE=1 SV=4
519	P46531	1311	1343	1311	1344	PF00008.28	EGF	Domain	1	31	32	23.3	5.7e-05	1	CL0001	sp|P46531|NOTC1_HUMAN Neurogenic locus notch homolog protein 1 OS=Homo sapiens OX=9606 GN=NOTCH1 PE=1 SV=4
520	P46531	1357	1375	1357	1375	PF12661.8	hEGF	Domain	1	19	22	16.9	0.0077	1	CL0001	sp|P46531|NOTC1_HUMAN Neurogenic locus notch homolog protein 1 OS=Homo sapiens OX=9606 GN=NOTCH1 PE=1 SV=4
521	P46531	1447	1480	1446	1480	PF00066.18	Notch	Domain	2	36	36	34.5	2.1e-08	1	No_clan	sp|P46531|NOTC1_HUMAN Neurogenic locus notch homolog protein 1 OS=Homo sapiens OX=9606 GN=NOTCH1 PE=1 SV=4
522	P46531	1487	1522	1487	1522	PF00066.18	Notch	Domain	1	36	36	48.2	1.1e-12	1	No_clan	sp|P46531|NOTC1_HUMAN Neurogenic locus notch homolog protein 1 OS=Homo sapiens OX=9606 GN=NOTCH1 PE=1 SV=4
523	P46531	1526	1561	1525	1562	PF00066.18	Notch	Domain	2	35	36	42.8	5.2e-11	1	No_clan	sp|P46531|NOTC1_HUMAN Neurogenic locus notch homolog protein 1 OS=Homo sapiens OX=9606 GN=NOTCH1 PE=1 SV=4
524	P46531	1566	1621	1566	1621	PF06816.14	NOD	Family	1	56	56	91.4	1.8e-26	1	No_clan	sp|P46531|NOTC1_HUMAN Neurogenic locus notch homolog protein 1 OS=Homo sapiens OX=9606 GN=NOTCH1 PE=1 SV=4
525	P46531	1671	1729	1671	1729	PF07684.13	NODP	Family	1	59	59	83.4	8.9e-24	1	No_clan	sp|P46531|NOTC1_HUMAN Neurogenic locus notch homolog protein 1 OS=Homo sapiens OX=9606 GN=NOTCH1 PE=1 SV=4
526	P46531	1916	1989	1900	1992	PF12796.8	Ank_2	Repeat	18	80	83	38.8	1.1e-09	1	CL0465	sp|P46531|NOTC1_HUMAN Neurogenic locus notch homolog protein 1 OS=Homo sapiens OX=9606 GN=NOTCH1 PE=1 SV=4
527	P46531	1999	2090	1999	2092	PF12796.8	Ank_2	Repeat	1	82	83	43.4	4e-11	1	CL0465	sp|P46531|NOTC1_HUMAN Neurogenic locus notch homolog protein 1 OS=Homo sapiens OX=9606 GN=NOTCH1 PE=1 SV=4
528	P46531	2480	2539	2479	2540	PF11936.9	DUF3454	Family	2	63	64	84.2	6.4e-24	1	No_clan	sp|P46531|NOTC1_HUMAN Neurogenic locus notch homolog protein 1 OS=Homo sapiens OX=9606 GN=NOTCH1 PE=1 SV=4
529	Q04721	68	99	68	100	PF00008.28	EGF	Domain	1	31	32	28.2	1.8e-06	1	CL0001	sp|Q04721|NOTC2_HUMAN Neurogenic locus notch homolog protein 2 OS=Homo sapiens OX=9606 GN=NOTCH2 PE=1 SV=3
530	Q04721	113	140	109	141	PF00008.28	EGF	Domain	4	31	32	31.5	1.6e-07	1	CL0001	sp|Q04721|NOTC2_HUMAN Neurogenic locus notch homolog protein 2 OS=Homo sapiens OX=9606 GN=NOTCH2 PE=1 SV=3
531	Q04721	148	177	148	178	PF00008.28	EGF	Domain	1	31	32	23.1	6.7e-05	1	CL0001	sp|Q04721|NOTC2_HUMAN Neurogenic locus notch homolog protein 2 OS=Homo sapiens OX=9606 GN=NOTCH2 PE=1 SV=3
532	Q04721	182	214	182	221	PF07645.16	EGF_CA	Domain	1	34	42	35.1	1.1e-08	1	CL0001	sp|Q04721|NOTC2_HUMAN Neurogenic locus notch homolog protein 2 OS=Homo sapiens OX=9606 GN=NOTCH2 PE=1 SV=3
533	Q04721	230	252	230	252	PF12661.8	hEGF	Domain	1	22	22	15.4	0.022	1	CL0001	sp|Q04721|NOTC2_HUMAN Neurogenic locus notch homolog protein 2 OS=Homo sapiens OX=9606 GN=NOTCH2 PE=1 SV=3
534	Q04721	264	292	264	294	PF00008.28	EGF	Domain	1	30	32	25.2	1.5e-05	1	CL0001	sp|Q04721|NOTC2_HUMAN Neurogenic locus notch homolog protein 2 OS=Homo sapiens OX=9606 GN=NOTCH2 PE=1 SV=3
535	Q04721	298	331	298	338	PF07645.16	EGF_CA	Domain	1	34	42	32.9	5.7e-08	1	CL0001	sp|Q04721|NOTC2_HUMAN Neurogenic locus notch homolog protein 2 OS=Homo sapiens OX=9606 GN=NOTCH2 PE=1 SV=3
536	Q04721	347	367	347	367	PF12661.8	hEGF	Domain	1	21	22	15.1	0.028	1	CL0001	sp|Q04721|NOTC2_HUMAN Neurogenic locus notch homolog protein 2 OS=Homo sapiens OX=9606 GN=NOTCH2 PE=1 SV=3
537	Q04721	379	410	379	411	PF00008.28	EGF	Domain	1	31	32	24.1	3.4e-05	1	CL0001	sp|Q04721|NOTC2_HUMAN Neurogenic locus notch homolog protein 2 OS=Homo sapiens OX=9606 GN=NOTCH2 PE=1 SV=3
538	Q04721	415	449	415	454	PF07645.16	EGF_CA	Domain	1	34	42	33.8	2.9e-08	1	CL0001	sp|Q04721|NOTC2_HUMAN Neurogenic locus notch homolog protein 2 OS=Homo sapiens OX=9606 GN=NOTCH2 PE=1 SV=3
539	Q04721	460	489	460	490	PF00008.28	EGF	Domain	1	31	32	30	4.6e-07	1	CL0001	sp|Q04721|NOTC2_HUMAN Neurogenic locus notch homolog protein 2 OS=Homo sapiens OX=9606 GN=NOTCH2 PE=1 SV=3
540	Q04721	498	527	498	528	PF00008.28	EGF	Domain	1	31	32	31.7	1.4e-07	1	CL0001	sp|Q04721|NOTC2_HUMAN Neurogenic locus notch homolog protein 2 OS=Homo sapiens OX=9606 GN=NOTCH2 PE=1 SV=3
541	Q04721	536	564	536	566	PF00008.28	EGF	Domain	1	30	32	37.1	2.8e-09	1	CL0001	sp|Q04721|NOTC2_HUMAN Neurogenic locus notch homolog protein 2 OS=Homo sapiens OX=9606 GN=NOTCH2 PE=1 SV=3
542	Q04721	579	599	579	599	PF12661.8	hEGF	Domain	1	22	22	23.6	5.8e-05	1	CL0001	sp|Q04721|NOTC2_HUMAN Neurogenic locus notch homolog protein 2 OS=Homo sapiens OX=9606 GN=NOTCH2 PE=1 SV=3
543	Q04721	611	639	611	641	PF00008.28	EGF	Domain	1	30	32	27.6	2.7e-06	1	CL0001	sp|Q04721|NOTC2_HUMAN Neurogenic locus notch homolog protein 2 OS=Homo sapiens OX=9606 GN=NOTCH2 PE=1 SV=3
544	Q04721	649	678	649	678	PF00008.28	EGF	Domain	1	32	32	31.1	2.1e-07	1	CL0001	sp|Q04721|NOTC2_HUMAN Neurogenic locus notch homolog protein 2 OS=Homo sapiens OX=9606 GN=NOTCH2 PE=1 SV=3
545	Q04721	686	711	686	721	PF00008.28	EGF	Domain	1	27	32	23.7	4.3e-05	1	CL0001	sp|Q04721|NOTC2_HUMAN Neurogenic locus notch homolog protein 2 OS=Homo sapiens OX=9606 GN=NOTCH2 PE=1 SV=3
546	Q04721	761	789	761	791	PF00008.28	EGF	Domain	1	30	32	29.9	5.1e-07	1	CL0001	sp|Q04721|NOTC2_HUMAN Neurogenic locus notch homolog protein 2 OS=Homo sapiens OX=9606 GN=NOTCH2 PE=1 SV=3
547	Q04721	799	829	799	829	PF00008.28	EGF	Domain	1	32	32	34	2.7e-08	1	CL0001	sp|Q04721|NOTC2_HUMAN Neurogenic locus notch homolog protein 2 OS=Homo sapiens OX=9606 GN=NOTCH2 PE=1 SV=3
548	Q04721	837	869	837	869	PF00008.28	EGF	Domain	1	32	32	30.9	2.5e-07	1	CL0001	sp|Q04721|NOTC2_HUMAN Neurogenic locus notch homolog protein 2 OS=Homo sapiens OX=9606 GN=NOTCH2 PE=1 SV=3
549	Q04721	873	904	873	910	PF07645.16	EGF_CA	Domain	1	34	42	32.2	9.2e-08	1	CL0001	sp|Q04721|NOTC2_HUMAN Neurogenic locus notch homolog protein 2 OS=Homo sapiens OX=9606 GN=NOTCH2 PE=1 SV=3
550	Q04721	915	944	915	945	PF00008.28	EGF	Domain	1	31	32	34.5	1.8e-08	1	CL0001	sp|Q04721|NOTC2_HUMAN Neurogenic locus notch homolog protein 2 OS=Homo sapiens OX=9606 GN=NOTCH2 PE=1 SV=3
551	Q04721	953	982	953	983	PF00008.28	EGF	Domain	1	31	32	30.7	2.8e-07	1	CL0001	sp|Q04721|NOTC2_HUMAN Neurogenic locus notch homolog protein 2 OS=Homo sapiens OX=9606 GN=NOTCH2 PE=1 SV=3
552	Q04721	991	1020	988	1021	PF00008.28	EGF	Domain	1	31	32	30	4.8e-07	1	CL0001	sp|Q04721|NOTC2_HUMAN Neurogenic locus notch homolog protein 2 OS=Homo sapiens OX=9606 GN=NOTCH2 PE=1 SV=3
553	Q04721	1029	1059	1029	1059	PF00008.28	EGF	Domain	1	32	32	38.2	1.3e-09	1	CL0001	sp|Q04721|NOTC2_HUMAN Neurogenic locus notch homolog protein 2 OS=Homo sapiens OX=9606 GN=NOTCH2 PE=1 SV=3
554	Q04721	1067	1097	1067	1097	PF00008.28	EGF	Domain	1	32	32	23.7	4.5e-05	1	CL0001	sp|Q04721|NOTC2_HUMAN Neurogenic locus notch homolog protein 2 OS=Homo sapiens OX=9606 GN=NOTCH2 PE=1 SV=3
555	Q04721	1120	1145	1116	1145	PF00008.28	EGF	Domain	6	32	32	25.4	1.3e-05	1	CL0001	sp|Q04721|NOTC2_HUMAN Neurogenic locus notch homolog protein 2 OS=Homo sapiens OX=9606 GN=NOTCH2 PE=1 SV=3
556	Q04721	1153	1182	1153	1183	PF00008.28	EGF	Domain	1	31	32	31.8	1.3e-07	1	CL0001	sp|Q04721|NOTC2_HUMAN Neurogenic locus notch homolog protein 2 OS=Homo sapiens OX=9606 GN=NOTCH2 PE=1 SV=3
557	Q04721	1191	1219	1191	1221	PF00008.28	EGF	Domain	1	30	32	29.6	6.2e-07	1	CL0001	sp|Q04721|NOTC2_HUMAN Neurogenic locus notch homolog protein 2 OS=Homo sapiens OX=9606 GN=NOTCH2 PE=1 SV=3
558	Q04721	1229	1260	1229	1260	PF00008.28	EGF	Domain	1	32	32	30.4	3.6e-07	1	CL0001	sp|Q04721|NOTC2_HUMAN Neurogenic locus notch homolog protein 2 OS=Homo sapiens OX=9606 GN=NOTCH2 PE=1 SV=3
559	Q04721	1308	1341	1308	1341	PF00008.28	EGF	Domain	1	32	32	31.5	1.6e-07	1	CL0001	sp|Q04721|NOTC2_HUMAN Neurogenic locus notch homolog protein 2 OS=Homo sapiens OX=9606 GN=NOTCH2 PE=1 SV=3
560	Q04721	1424	1456	1422	1456	PF00066.18	Notch	Domain	3	36	36	42.3	7.7e-11	1	No_clan	sp|Q04721|NOTC2_HUMAN Neurogenic locus notch homolog protein 2 OS=Homo sapiens OX=9606 GN=NOTCH2 PE=1 SV=3
561	Q04721	1463	1497	1463	1497	PF00066.18	Notch	Domain	1	36	36	33.5	4.3e-08	1	No_clan	sp|Q04721|NOTC2_HUMAN Neurogenic locus notch homolog protein 2 OS=Homo sapiens OX=9606 GN=NOTCH2 PE=1 SV=3
562	Q04721	1501	1534	1500	1535	PF00066.18	Notch	Domain	2	35	36	44.1	2e-11	1	No_clan	sp|Q04721|NOTC2_HUMAN Neurogenic locus notch homolog protein 2 OS=Homo sapiens OX=9606 GN=NOTCH2 PE=1 SV=3
563	Q04721	1539	1594	1539	1594	PF06816.14	NOD	Family	1	56	56	86.5	6.2e-25	1	No_clan	sp|Q04721|NOTC2_HUMAN Neurogenic locus notch homolog protein 2 OS=Homo sapiens OX=9606 GN=NOTCH2 PE=1 SV=3
564	Q04721	1618	1671	1618	1674	PF07684.13	NODP	Family	1	56	59	64.8	5.5e-18	1	No_clan	sp|Q04721|NOTC2_HUMAN Neurogenic locus notch homolog protein 2 OS=Homo sapiens OX=9606 GN=NOTCH2 PE=1 SV=3
565	Q04721	1873	1913	1862	1914	PF13857.7	Ank_5	Repeat	12	52	56	27.8	2.3e-06	1	CL0465	sp|Q04721|NOTC2_HUMAN Neurogenic locus notch homolog protein 2 OS=Homo sapiens OX=9606 GN=NOTCH2 PE=1 SV=3
566	Q04721	1958	2039	1954	2042	PF12796.8	Ank_2	Repeat	8	82	83	44.8	1.5e-11	1	CL0465	sp|Q04721|NOTC2_HUMAN Neurogenic locus notch homolog protein 2 OS=Homo sapiens OX=9606 GN=NOTCH2 PE=1 SV=3
567	Q04721	2382	2444	2381	2444	PF11936.9	DUF3454	Family	2	64	64	94.4	4.1e-27	1	No_clan	sp|Q04721|NOTC2_HUMAN Neurogenic locus notch homolog protein 2 OS=Homo sapiens OX=9606 GN=NOTCH2 PE=1 SV=3
568	P08519	28	105	28	105	PF00051.19	Kringle	Domain	1	79	79	95.7	1.5e-27	1	CL0602	sp|P08519|APOA_HUMAN Apolipoprotein(a) OS=Homo sapiens OX=9606 GN=LPA PE=1 SV=1
569	P08519	142	219	142	219	PF00051.19	Kringle	Domain	1	79	79	95.2	2.1e-27	1	CL0602	sp|P08519|APOA_HUMAN Apolipoprotein(a) OS=Homo sapiens OX=9606 GN=LPA PE=1 SV=1
570	P08519	256	333	256	333	PF00051.19	Kringle	Domain	1	79	79	95.2	2.1e-27	1	CL0602	sp|P08519|APOA_HUMAN Apolipoprotein(a) OS=Homo sapiens OX=9606 GN=LPA PE=1 SV=1
571	P08519	370	447	370	447	PF00051.19	Kringle	Domain	1	79	79	95.2	2.1e-27	1	CL0602	sp|P08519|APOA_HUMAN Apolipoprotein(a) OS=Homo sapiens OX=9606 GN=LPA PE=1 SV=1
572	P08519	484	561	484	561	PF00051.19	Kringle	Domain	1	79	79	95.2	2.1e-27	1	CL0602	sp|P08519|APOA_HUMAN Apolipoprotein(a) OS=Homo sapiens OX=9606 GN=LPA PE=1 SV=1
573	P08519	598	675	598	675	PF00051.19	Kringle	Domain	1	79	79	95.2	2.1e-27	1	CL0602	sp|P08519|APOA_HUMAN Apolipoprotein(a) OS=Homo sapiens OX=9606 GN=LPA PE=1 SV=1
574	P08519	712	789	712	789	PF00051.19	Kringle	Domain	1	79	79	95.2	2.1e-27	1	CL0602	sp|P08519|APOA_HUMAN Apolipoprotein(a) OS=Homo sapiens OX=9606 GN=LPA PE=1 SV=1
575	P08519	826	903	826	903	PF00051.19	Kringle	Domain	1	79	79	95.2	2.1e-27	1	CL0602	sp|P08519|APOA_HUMAN Apolipoprotein(a) OS=Homo sapiens OX=9606 GN=LPA PE=1 SV=1
576	P08519	940	1017	940	1017	PF00051.19	Kringle	Domain	1	79	79	95.2	2.1e-27	1	CL0602	sp|P08519|APOA_HUMAN Apolipoprotein(a) OS=Homo sapiens OX=9606 GN=LPA PE=1 SV=1
577	P08519	1054	1131	1054	1131	PF00051.19	Kringle	Domain	1	79	79	95.2	2.1e-27	1	CL0602	sp|P08519|APOA_HUMAN Apolipoprotein(a) OS=Homo sapiens OX=9606 GN=LPA PE=1 SV=1
578	P08519	1168	1245	1168	1245	PF00051.19	Kringle	Domain	1	79	79	95.2	2.1e-27	1	CL0602	sp|P08519|APOA_HUMAN Apolipoprotein(a) OS=Homo sapiens OX=9606 GN=LPA PE=1 SV=1
579	P08519	1282	1359	1282	1359	PF00051.19	Kringle	Domain	1	79	79	95.2	2.1e-27	1	CL0602	sp|P08519|APOA_HUMAN Apolipoprotein(a) OS=Homo sapiens OX=9606 GN=LPA PE=1 SV=1
580	P08519	1396	1473	1396	1473	PF00051.19	Kringle	Domain	1	79	79	95.2	2.1e-27	1	CL0602	sp|P08519|APOA_HUMAN Apolipoprotein(a) OS=Homo sapiens OX=9606 GN=LPA PE=1 SV=1
581	P08519	1510	1587	1510	1587	PF00051.19	Kringle	Domain	1	79	79	95.2	2.1e-27	1	CL0602	sp|P08519|APOA_HUMAN Apolipoprotein(a) OS=Homo sapiens OX=9606 GN=LPA PE=1 SV=1
582	P08519	1624	1701	1624	1701	PF00051.19	Kringle	Domain	1	79	79	95.2	2.1e-27	1	CL0602	sp|P08519|APOA_HUMAN Apolipoprotein(a) OS=Homo sapiens OX=9606 GN=LPA PE=1 SV=1
583	P08519	1738	1815	1738	1815	PF00051.19	Kringle	Domain	1	79	79	95.2	2.1e-27	1	CL0602	sp|P08519|APOA_HUMAN Apolipoprotein(a) OS=Homo sapiens OX=9606 GN=LPA PE=1 SV=1
584	P08519	1852	1929	1852	1929	PF00051.19	Kringle	Domain	1	79	79	95.2	2.1e-27	1	CL0602	sp|P08519|APOA_HUMAN Apolipoprotein(a) OS=Homo sapiens OX=9606 GN=LPA PE=1 SV=1
585	P08519	1966	2043	1966	2043	PF00051.19	Kringle	Domain	1	79	79	95.2	2.1e-27	1	CL0602	sp|P08519|APOA_HUMAN Apolipoprotein(a) OS=Homo sapiens OX=9606 GN=LPA PE=1 SV=1
586	P08519	2080	2157	2080	2157	PF00051.19	Kringle	Domain	1	79	79	95.2	2.1e-27	1	CL0602	sp|P08519|APOA_HUMAN Apolipoprotein(a) OS=Homo sapiens OX=9606 GN=LPA PE=1 SV=1
587	P08519	2194	2271	2194	2271	PF00051.19	Kringle	Domain	1	79	79	95.2	2.1e-27	1	CL0602	sp|P08519|APOA_HUMAN Apolipoprotein(a) OS=Homo sapiens OX=9606 GN=LPA PE=1 SV=1
588	P08519	2308	2385	2308	2385	PF00051.19	Kringle	Domain	1	79	79	95.2	2.1e-27	1	CL0602	sp|P08519|APOA_HUMAN Apolipoprotein(a) OS=Homo sapiens OX=9606 GN=LPA PE=1 SV=1
589	P08519	2422	2499	2422	2499	PF00051.19	Kringle	Domain	1	79	79	95.2	2.1e-27	1	CL0602	sp|P08519|APOA_HUMAN Apolipoprotein(a) OS=Homo sapiens OX=9606 GN=LPA PE=1 SV=1
590	P08519	2536	2613	2536	2613	PF00051.19	Kringle	Domain	1	79	79	95.2	2.1e-27	1	CL0602	sp|P08519|APOA_HUMAN Apolipoprotein(a) OS=Homo sapiens OX=9606 GN=LPA PE=1 SV=1
591	P08519	2650	2727	2650	2727	PF00051.19	Kringle	Domain	1	79	79	95.2	2.1e-27	1	CL0602	sp|P08519|APOA_HUMAN Apolipoprotein(a) OS=Homo sapiens OX=9606 GN=LPA PE=1 SV=1
592	P08519	2764	2841	2764	2841	PF00051.19	Kringle	Domain	1	79	79	95.2	2.1e-27	1	CL0602	sp|P08519|APOA_HUMAN Apolipoprotein(a) OS=Homo sapiens OX=9606 GN=LPA PE=1 SV=1
593	P08519	2878	2955	2878	2955	PF00051.19	Kringle	Domain	1	79	79	95.2	2.1e-27	1	CL0602	sp|P08519|APOA_HUMAN Apolipoprotein(a) OS=Homo sapiens OX=9606 GN=LPA PE=1 SV=1
594	P08519	2992	3069	2992	3069	PF00051.19	Kringle	Domain	1	79	79	95.2	2.1e-27	1	CL0602	sp|P08519|APOA_HUMAN Apolipoprotein(a) OS=Homo sapiens OX=9606 GN=LPA PE=1 SV=1
595	P08519	3106	3183	3106	3183	PF00051.19	Kringle	Domain	1	79	79	95.2	2.1e-27	1	CL0602	sp|P08519|APOA_HUMAN Apolipoprotein(a) OS=Homo sapiens OX=9606 GN=LPA PE=1 SV=1
596	P08519	3220	3297	3220	3297	PF00051.19	Kringle	Domain	1	79	79	95.2	2.1e-27	1	CL0602	sp|P08519|APOA_HUMAN Apolipoprotein(a) OS=Homo sapiens OX=9606 GN=LPA PE=1 SV=1
597	P08519	3334	3411	3334	3411	PF00051.19	Kringle	Domain	1	79	79	95.1	2.4e-27	1	CL0602	sp|P08519|APOA_HUMAN Apolipoprotein(a) OS=Homo sapiens OX=9606 GN=LPA PE=1 SV=1
598	P08519	3448	3525	3448	3525	PF00051.19	Kringle	Domain	1	79	79	92.3	1.8e-26	1	CL0602	sp|P08519|APOA_HUMAN Apolipoprotein(a) OS=Homo sapiens OX=9606 GN=LPA PE=1 SV=1
599	P08519	3562	3639	3562	3639	PF00051.19	Kringle	Domain	1	79	79	97.2	5.2e-28	1	CL0602	sp|P08519|APOA_HUMAN Apolipoprotein(a) OS=Homo sapiens OX=9606 GN=LPA PE=1 SV=1
600	P08519	3676	3753	3676	3753	PF00051.19	Kringle	Domain	1	79	79	92.6	1.5e-26	1	CL0602	sp|P08519|APOA_HUMAN Apolipoprotein(a) OS=Homo sapiens OX=9606 GN=LPA PE=1 SV=1
601	P08519	3782	3859	3782	3859	PF00051.19	Kringle	Domain	1	79	79	93.6	6.9e-27	1	CL0602	sp|P08519|APOA_HUMAN Apolipoprotein(a) OS=Homo sapiens OX=9606 GN=LPA PE=1 SV=1
602	P08519	3896	3973	3896	3973	PF00051.19	Kringle	Domain	1	79	79	94.9	2.7e-27	1	CL0602	sp|P08519|APOA_HUMAN Apolipoprotein(a) OS=Homo sapiens OX=9606 GN=LPA PE=1 SV=1
603	P08519	4010	4087	4010	4087	PF00051.19	Kringle	Domain	1	79	79	93	1e-26	1	CL0602	sp|P08519|APOA_HUMAN Apolipoprotein(a) OS=Homo sapiens OX=9606 GN=LPA PE=1 SV=1
604	P08519	4124	4201	4124	4201	PF00051.19	Kringle	Domain	1	79	79	101.4	2.6e-29	1	CL0602	sp|P08519|APOA_HUMAN Apolipoprotein(a) OS=Homo sapiens OX=9606 GN=LPA PE=1 SV=1
605	P08519	4228	4307	4228	4307	PF00051.19	Kringle	Domain	1	79	79	97	6e-28	1	CL0602	sp|P08519|APOA_HUMAN Apolipoprotein(a) OS=Homo sapiens OX=9606 GN=LPA PE=1 SV=1
606	P08519	4328	4541	4328	4541	PF00089.27	Trypsin	Domain	1	221	221	209.4	6e-62	1	CL0124	sp|P08519|APOA_HUMAN Apolipoprotein(a) OS=Homo sapiens OX=9606 GN=LPA PE=1 SV=1
607	O75095	165	200	165	200	PF14670.7	FXa_inhibition	Domain	1	36	36	40.3	3e-10	1	CL0001	sp|O75095|MEGF6_HUMAN Multiple epidermal growth factor-like domains protein 6 OS=Homo sapiens OX=9606 GN=MEGF6 PE=1 SV=4
608	O75095	285	324	285	324	PF07645.16	EGF_CA	Domain	1	42	42	40.8	1.9e-10	1	CL0001	sp|O75095|MEGF6_HUMAN Multiple epidermal growth factor-like domains protein 6 OS=Homo sapiens OX=9606 GN=MEGF6 PE=1 SV=4
609	O75095	416	451	416	451	PF14670.7	FXa_inhibition	Domain	1	36	36	36.1	5.8e-09	1	CL0001	sp|O75095|MEGF6_HUMAN Multiple epidermal growth factor-like domains protein 6 OS=Homo sapiens OX=9606 GN=MEGF6 PE=1 SV=4
610	O75095	527	546	527	546	PF12661.8	hEGF	Domain	1	22	22	15.1	0.028	1	CL0001	sp|O75095|MEGF6_HUMAN Multiple epidermal growth factor-like domains protein 6 OS=Homo sapiens OX=9606 GN=MEGF6 PE=1 SV=4
611	O75095	568	613	568	613	PF00053.25	Laminin_EGF	Domain	1	49	49	20.1	0.00051	1	CL0001	sp|O75095|MEGF6_HUMAN Multiple epidermal growth factor-like domains protein 6 OS=Homo sapiens OX=9606 GN=MEGF6 PE=1 SV=4
612	O75095	873	917	873	919	PF00053.25	Laminin_EGF	Domain	1	47	49	15.4	0.016	1	CL0001	sp|O75095|MEGF6_HUMAN Multiple epidermal growth factor-like domains protein 6 OS=Homo sapiens OX=9606 GN=MEGF6 PE=1 SV=4
613	O75095	919	938	919	938	PF12661.8	hEGF	Domain	1	22	22	14.4	0.047	1	CL0001	sp|O75095|MEGF6_HUMAN Multiple epidermal growth factor-like domains protein 6 OS=Homo sapiens OX=9606 GN=MEGF6 PE=1 SV=4
614	O75095	1005	1024	1005	1024	PF12661.8	hEGF	Domain	1	22	22	15.3	0.023	1	CL0001	sp|O75095|MEGF6_HUMAN Multiple epidermal growth factor-like domains protein 6 OS=Homo sapiens OX=9606 GN=MEGF6 PE=1 SV=4
615	O75095	1048	1067	1048	1067	PF12661.8	hEGF	Domain	1	22	22	14.2	0.053	1	CL0001	sp|O75095|MEGF6_HUMAN Multiple epidermal growth factor-like domains protein 6 OS=Homo sapiens OX=9606 GN=MEGF6 PE=1 SV=4
616	O75095	1091	1110	1091	1110	PF12661.8	hEGF	Domain	1	22	22	15.2	0.026	1	CL0001	sp|O75095|MEGF6_HUMAN Multiple epidermal growth factor-like domains protein 6 OS=Homo sapiens OX=9606 GN=MEGF6 PE=1 SV=4
617	O75095	1132	1169	1128	1174	PF00053.25	Laminin_EGF	Domain	1	41	49	16.3	0.0079	1	CL0001	sp|O75095|MEGF6_HUMAN Multiple epidermal growth factor-like domains protein 6 OS=Homo sapiens OX=9606 GN=MEGF6 PE=1 SV=4
618	O75095	1175	1213	1175	1221	PF00053.25	Laminin_EGF	Domain	1	41	49	15.5	0.015	1	CL0001	sp|O75095|MEGF6_HUMAN Multiple epidermal growth factor-like domains protein 6 OS=Homo sapiens OX=9606 GN=MEGF6 PE=1 SV=4
619	O75095	1348	1385	1344	1391	PF00053.25	Laminin_EGF	Domain	1	41	49	15	0.021	1	CL0001	sp|O75095|MEGF6_HUMAN Multiple epidermal growth factor-like domains protein 6 OS=Homo sapiens OX=9606 GN=MEGF6 PE=1 SV=4
620	P04275	35	179	35	179	PF00094.26	VWD	Family	1	157	157	91.8	5.3e-26	1	No_clan	sp|P04275|VWF_HUMAN von Willebrand factor OS=Homo sapiens OX=9606 GN=VWF PE=1 SV=4
621	P04275	224	291	224	291	PF08742.12	C8	Domain	1	69	69	55.9	4.3e-15	1	No_clan	sp|P04275|VWF_HUMAN von Willebrand factor OS=Homo sapiens OX=9606 GN=VWF PE=1 SV=4
622	P04275	295	348	295	348	PF01826.18	TIL	Domain	1	55	55	44	2e-11	1	No_clan	sp|P04275|VWF_HUMAN von Willebrand factor OS=Homo sapiens OX=9606 GN=VWF PE=1 SV=4
623	P04275	388	540	388	541	PF00094.26	VWD	Family	1	156	157	136.9	6.9e-40	1	No_clan	sp|P04275|VWF_HUMAN von Willebrand factor OS=Homo sapiens OX=9606 GN=VWF PE=1 SV=4
624	P04275	584	648	583	648	PF08742.12	C8	Domain	2	69	69	64.9	6.6e-18	1	No_clan	sp|P04275|VWF_HUMAN von Willebrand factor OS=Homo sapiens OX=9606 GN=VWF PE=1 SV=4
625	P04275	652	707	652	707	PF01826.18	TIL	Domain	1	55	55	47.5	1.5e-12	1	No_clan	sp|P04275|VWF_HUMAN von Willebrand factor OS=Homo sapiens OX=9606 GN=VWF PE=1 SV=4
626	P04275	786	827	776	827	PF01826.18	TIL	Domain	12	55	55	25.7	1e-05	1	No_clan	sp|P04275|VWF_HUMAN von Willebrand factor OS=Homo sapiens OX=9606 GN=VWF PE=1 SV=4
627	P04275	867	1011	867	1013	PF00094.26	VWD	Family	1	155	157	110.1	1.3e-31	1	No_clan	sp|P04275|VWF_HUMAN von Willebrand factor OS=Homo sapiens OX=9606 GN=VWF PE=1 SV=4
628	P04275	1060	1126	1059	1126	PF08742.12	C8	Domain	2	69	69	61.3	8.7e-17	1	No_clan	sp|P04275|VWF_HUMAN von Willebrand factor OS=Homo sapiens OX=9606 GN=VWF PE=1 SV=4
629	P04275	1145	1196	1141	1196	PF01826.18	TIL	Domain	6	55	55	28.5	1.4e-06	1	No_clan	sp|P04275|VWF_HUMAN von Willebrand factor OS=Homo sapiens OX=9606 GN=VWF PE=1 SV=4
630	P04275	1198	1276	1198	1276	PF16164.6	VWA_N2	Family	1	79	79	135.7	4.4e-40	1	No_clan	sp|P04275|VWF_HUMAN von Willebrand factor OS=Homo sapiens OX=9606 GN=VWF PE=1 SV=4
631	P04275	1277	1449	1277	1452	PF00092.29	VWA	Domain	1	172	175	60.8	2e-16	1	CL0128	sp|P04275|VWF_HUMAN von Willebrand factor OS=Homo sapiens OX=9606 GN=VWF PE=1 SV=4
632	P04275	1498	1645	1498	1660	PF00092.29	VWA	Domain	1	154	175	97.1	1.4e-27	1	CL0128	sp|P04275|VWF_HUMAN von Willebrand factor OS=Homo sapiens OX=9606 GN=VWF PE=1 SV=4
633	P04275	1691	1859	1691	1862	PF00092.29	VWA	Domain	1	171	175	113.1	1.7e-32	1	CL0128	sp|P04275|VWF_HUMAN von Willebrand factor OS=Homo sapiens OX=9606 GN=VWF PE=1 SV=4
634	P04275	1950	2102	1950	2102	PF00094.26	VWD	Family	1	157	157	114.2	6.9e-33	1	No_clan	sp|P04275|VWF_HUMAN von Willebrand factor OS=Homo sapiens OX=9606 GN=VWF PE=1 SV=4
635	P04275	2138	2199	2138	2199	PF08742.12	C8	Domain	1	69	69	52.5	4.9e-14	1	No_clan	sp|P04275|VWF_HUMAN von Willebrand factor OS=Homo sapiens OX=9606 GN=VWF PE=1 SV=4
636	P04275	2257	2325	2257	2327	PF00093.19	VWC	Family	1	57	57	28.3	1.6e-06	1	CL0451	sp|P04275|VWF_HUMAN von Willebrand factor OS=Homo sapiens OX=9606 GN=VWF PE=1 SV=4
637	P04275	2431	2494	2431	2494	PF00093.19	VWC	Family	1	57	57	34.8	1.5e-08	1	CL0451	sp|P04275|VWF_HUMAN von Willebrand factor OS=Homo sapiens OX=9606 GN=VWF PE=1 SV=4
638	P04275	2582	2644	2582	2644	PF00093.19	VWC	Family	1	57	57	32.4	8.4e-08	1	CL0451	sp|P04275|VWF_HUMAN von Willebrand factor OS=Homo sapiens OX=9606 GN=VWF PE=1 SV=4
639	Q9UM47	43	75	43	75	PF00008.28	EGF	Domain	1	32	32	24.9	1.8e-05	1	CL0001	sp|Q9UM47|NOTC3_HUMAN Neurogenic locus notch homolog protein 3 OS=Homo sapiens OX=9606 GN=NOTCH3 PE=1 SV=2
640	Q9UM47	123	153	123	154	PF00008.28	EGF	Domain	1	31	32	24.7	2.1e-05	1	CL0001	sp|Q9UM47|NOTC3_HUMAN Neurogenic locus notch homolog protein 3 OS=Homo sapiens OX=9606 GN=NOTCH3 PE=1 SV=2
641	Q9UM47	158	190	158	201	PF07645.16	EGF_CA	Domain	1	34	42	38.1	1.3e-09	1	CL0001	sp|Q9UM47|NOTC3_HUMAN Neurogenic locus notch homolog protein 3 OS=Homo sapiens OX=9606 GN=NOTCH3 PE=1 SV=2
642	Q9UM47	201	231	201	232	PF00008.28	EGF	Domain	1	31	32	21.9	0.00016	1	CL0001	sp|Q9UM47|NOTC3_HUMAN Neurogenic locus notch homolog protein 3 OS=Homo sapiens OX=9606 GN=NOTCH3 PE=1 SV=2
643	Q9UM47	240	269	240	270	PF00008.28	EGF	Domain	1	31	32	29	9.5e-07	1	CL0001	sp|Q9UM47|NOTC3_HUMAN Neurogenic locus notch homolog protein 3 OS=Homo sapiens OX=9606 GN=NOTCH3 PE=1 SV=2
644	Q9UM47	274	307	274	315	PF07645.16	EGF_CA	Domain	1	34	42	35	1.3e-08	1	CL0001	sp|Q9UM47|NOTC3_HUMAN Neurogenic locus notch homolog protein 3 OS=Homo sapiens OX=9606 GN=NOTCH3 PE=1 SV=2
645	Q9UM47	318	346	317	348	PF00008.28	EGF	Domain	1	30	32	21.8	0.00017	1	CL0001	sp|Q9UM47|NOTC3_HUMAN Neurogenic locus notch homolog protein 3 OS=Homo sapiens OX=9606 GN=NOTCH3 PE=1 SV=2
646	Q9UM47	355	385	355	385	PF00008.28	EGF	Domain	1	30	32	23.7	4.5e-05	1	CL0001	sp|Q9UM47|NOTC3_HUMAN Neurogenic locus notch homolog protein 3 OS=Homo sapiens OX=9606 GN=NOTCH3 PE=1 SV=2
647	Q9UM47	391	424	391	430	PF07645.16	EGF_CA	Domain	1	34	42	37.6	1.9e-09	1	CL0001	sp|Q9UM47|NOTC3_HUMAN Neurogenic locus notch homolog protein 3 OS=Homo sapiens OX=9606 GN=NOTCH3 PE=1 SV=2
648	Q9UM47	431	462	431	467	PF07645.16	EGF_CA	Domain	1	34	42	24.4	2.5e-05	1	CL0001	sp|Q9UM47|NOTC3_HUMAN Neurogenic locus notch homolog protein 3 OS=Homo sapiens OX=9606 GN=NOTCH3 PE=1 SV=2
649	Q9UM47	473	503	473	503	PF00008.28	EGF	Domain	1	32	32	26	8.4e-06	1	CL0001	sp|Q9UM47|NOTC3_HUMAN Neurogenic locus notch homolog protein 3 OS=Homo sapiens OX=9606 GN=NOTCH3 PE=1 SV=2
650	Q9UM47	511	539	511	541	PF00008.28	EGF	Domain	1	30	32	30.5	3.2e-07	1	CL0001	sp|Q9UM47|NOTC3_HUMAN Neurogenic locus notch homolog protein 3 OS=Homo sapiens OX=9606 GN=NOTCH3 PE=1 SV=2
651	Q9UM47	549	578	549	578	PF00008.28	EGF	Domain	1	32	32	30.6	3e-07	1	CL0001	sp|Q9UM47|NOTC3_HUMAN Neurogenic locus notch homolog protein 3 OS=Homo sapiens OX=9606 GN=NOTCH3 PE=1 SV=2
652	Q9UM47	586	615	586	616	PF00008.28	EGF	Domain	1	31	32	27.3	3.3e-06	1	CL0001	sp|Q9UM47|NOTC3_HUMAN Neurogenic locus notch homolog protein 3 OS=Homo sapiens OX=9606 GN=NOTCH3 PE=1 SV=2
653	Q9UM47	666	686	666	686	PF12661.8	hEGF	Domain	1	21	22	17.6	0.0046	1	CL0001	sp|Q9UM47|NOTC3_HUMAN Neurogenic locus notch homolog protein 3 OS=Homo sapiens OX=9606 GN=NOTCH3 PE=1 SV=2
654	Q9UM47	704	724	704	724	PF12661.8	hEGF	Domain	1	22	22	19	0.0017	1	CL0001	sp|Q9UM47|NOTC3_HUMAN Neurogenic locus notch homolog protein 3 OS=Homo sapiens OX=9606 GN=NOTCH3 PE=1 SV=2
655	Q9UM47	775	806	775	806	PF00008.28	EGF	Domain	1	32	32	27.2	3.5e-06	1	CL0001	sp|Q9UM47|NOTC3_HUMAN Neurogenic locus notch homolog protein 3 OS=Homo sapiens OX=9606 GN=NOTCH3 PE=1 SV=2
656	Q9UM47	810	842	810	848	PF07645.16	EGF_CA	Domain	1	34	42	31.4	1.6e-07	1	CL0001	sp|Q9UM47|NOTC3_HUMAN Neurogenic locus notch homolog protein 3 OS=Homo sapiens OX=9606 GN=NOTCH3 PE=1 SV=2
657	Q9UM47	853	883	853	883	PF00008.28	EGF	Domain	1	32	32	31.8	1.3e-07	1	CL0001	sp|Q9UM47|NOTC3_HUMAN Neurogenic locus notch homolog protein 3 OS=Homo sapiens OX=9606 GN=NOTCH3 PE=1 SV=2
658	Q9UM47	896	916	896	916	PF12661.8	hEGF	Domain	1	22	22	21.2	0.00033	1	CL0001	sp|Q9UM47|NOTC3_HUMAN Neurogenic locus notch homolog protein 3 OS=Homo sapiens OX=9606 GN=NOTCH3 PE=1 SV=2
659	Q9UM47	928	958	926	958	PF00008.28	EGF	Domain	1	32	32	29.4	7.6e-07	1	CL0001	sp|Q9UM47|NOTC3_HUMAN Neurogenic locus notch homolog protein 3 OS=Homo sapiens OX=9606 GN=NOTCH3 PE=1 SV=2
660	Q9UM47	1004	1031	1004	1032	PF00008.28	EGF	Domain	1	31	32	28.7	1.2e-06	1	CL0001	sp|Q9UM47|NOTC3_HUMAN Neurogenic locus notch homolog protein 3 OS=Homo sapiens OX=9606 GN=NOTCH3 PE=1 SV=2
661	Q9UM47	1055	1080	1051	1080	PF00008.28	EGF	Domain	6	32	32	22.3	0.00012	1	CL0001	sp|Q9UM47|NOTC3_HUMAN Neurogenic locus notch homolog protein 3 OS=Homo sapiens OX=9606 GN=NOTCH3 PE=1 SV=2
662	Q9UM47	1088	1118	1088	1118	PF00008.28	EGF	Domain	1	32	32	25	1.7e-05	1	CL0001	sp|Q9UM47|NOTC3_HUMAN Neurogenic locus notch homolog protein 3 OS=Homo sapiens OX=9606 GN=NOTCH3 PE=1 SV=2
663	Q9UM47	1126	1151	1126	1155	PF00008.28	EGF	Domain	1	27	32	28.5	1.4e-06	1	CL0001	sp|Q9UM47|NOTC3_HUMAN Neurogenic locus notch homolog protein 3 OS=Homo sapiens OX=9606 GN=NOTCH3 PE=1 SV=2
664	Q9UM47	1172	1201	1164	1201	PF00008.28	EGF	Domain	3	32	32	34.1	2.5e-08	1	CL0001	sp|Q9UM47|NOTC3_HUMAN Neurogenic locus notch homolog protein 3 OS=Homo sapiens OX=9606 GN=NOTCH3 PE=1 SV=2
665	Q9UM47	1339	1371	1339	1371	PF00008.28	EGF	Domain	1	32	32	28	2e-06	1	CL0001	sp|Q9UM47|NOTC3_HUMAN Neurogenic locus notch homolog protein 3 OS=Homo sapiens OX=9606 GN=NOTCH3 PE=1 SV=2
666	Q9UM47	1385	1418	1384	1418	PF00066.18	Notch	Domain	2	36	36	41.4	1.4e-10	1	No_clan	sp|Q9UM47|NOTC3_HUMAN Neurogenic locus notch homolog protein 3 OS=Homo sapiens OX=9606 GN=NOTCH3 PE=1 SV=2
667	Q9UM47	1425	1458	1425	1459	PF00066.18	Notch	Domain	1	35	36	41.6	1.3e-10	1	No_clan	sp|Q9UM47|NOTC3_HUMAN Neurogenic locus notch homolog protein 3 OS=Homo sapiens OX=9606 GN=NOTCH3 PE=1 SV=2
668	Q9UM47	1465	1500	1464	1501	PF00066.18	Notch	Domain	2	35	36	46.4	4.1e-12	1	No_clan	sp|Q9UM47|NOTC3_HUMAN Neurogenic locus notch homolog protein 3 OS=Homo sapiens OX=9606 GN=NOTCH3 PE=1 SV=2
669	Q9UM47	1505	1559	1505	1560	PF06816.14	NOD	Family	1	55	56	72.7	1.2e-20	1	No_clan	sp|Q9UM47|NOTC3_HUMAN Neurogenic locus notch homolog protein 3 OS=Homo sapiens OX=9606 GN=NOTCH3 PE=1 SV=2
670	Q9UM47	1577	1637	1577	1637	PF07684.13	NODP	Family	1	59	59	77.5	6.3e-22	1	No_clan	sp|Q9UM47|NOTC3_HUMAN Neurogenic locus notch homolog protein 3 OS=Homo sapiens OX=9606 GN=NOTCH3 PE=1 SV=2
671	Q9UM47	1821	1900	1811	1905	PF12796.8	Ank_2	Repeat	13	80	83	35	1.7e-08	1	CL0465	sp|Q9UM47|NOTC3_HUMAN Neurogenic locus notch homolog protein 3 OS=Homo sapiens OX=9606 GN=NOTCH3 PE=1 SV=2
672	Q9UM47	1910	2000	1910	2002	PF12796.8	Ank_2	Repeat	1	81	83	46.3	4.8e-12	1	CL0465	sp|Q9UM47|NOTC3_HUMAN Neurogenic locus notch homolog protein 3 OS=Homo sapiens OX=9606 GN=NOTCH3 PE=1 SV=2
673	Q9UM47	2213	2274	2211	2274	PF11936.9	DUF3454	Family	4	64	64	73.2	1.8e-20	1	No_clan	sp|Q9UM47|NOTC3_HUMAN Neurogenic locus notch homolog protein 3 OS=Homo sapiens OX=9606 GN=NOTCH3 PE=1 SV=2
674	Q5T1H1	183	210	176	210	PF00008.28	EGF	Domain	6	32	32	24	3.6e-05	1	CL0001	sp|Q5T1H1|EYS_HUMAN Protein eyes shut homolog OS=Homo sapiens OX=9606 GN=EYS PE=1 SV=5
675	Q5T1H1	685	711	685	712	PF00008.28	EGF	Domain	1	28	32	27.1	3.8e-06	1	CL0001	sp|Q5T1H1|EYS_HUMAN Protein eyes shut homolog OS=Homo sapiens OX=9606 GN=EYS PE=1 SV=5
676	Q5T1H1	742	763	742	763	PF12661.8	hEGF	Domain	1	22	22	14.1	0.059	1	CL0001	sp|Q5T1H1|EYS_HUMAN Protein eyes shut homolog OS=Homo sapiens OX=9606 GN=EYS PE=1 SV=5
677	Q5T1H1	775	804	775	805	PF00008.28	EGF	Domain	1	31	32	26.2	7.1e-06	1	CL0001	sp|Q5T1H1|EYS_HUMAN Protein eyes shut homolog OS=Homo sapiens OX=9606 GN=EYS PE=1 SV=5
678	Q5T1H1	899	920	899	920	PF12661.8	hEGF	Domain	1	22	22	15.8	0.017	1	CL0001	sp|Q5T1H1|EYS_HUMAN Protein eyes shut homolog OS=Homo sapiens OX=9606 GN=EYS PE=1 SV=5
679	Q5T1H1	932	961	932	962	PF00008.28	EGF	Domain	1	31	32	23.2	6.3e-05	1	CL0001	sp|Q5T1H1|EYS_HUMAN Protein eyes shut homolog OS=Homo sapiens OX=9606 GN=EYS PE=1 SV=5
680	Q5T1H1	1008	1037	1008	1038	PF00008.28	EGF	Domain	1	31	32	30.7	2.8e-07	1	CL0001	sp|Q5T1H1|EYS_HUMAN Protein eyes shut homolog OS=Homo sapiens OX=9606 GN=EYS PE=1 SV=5
681	Q5T1H1	1083	1113	1083	1113	PF00008.28	EGF	Domain	1	32	32	24.5	2.5e-05	1	CL0001	sp|Q5T1H1|EYS_HUMAN Protein eyes shut homolog OS=Homo sapiens OX=9606 GN=EYS PE=1 SV=5
682	Q5T1H1	1127	1156	1121	1157	PF00008.28	EGF	Domain	5	31	32	23.3	5.9e-05	1	CL0001	sp|Q5T1H1|EYS_HUMAN Protein eyes shut homolog OS=Homo sapiens OX=9606 GN=EYS PE=1 SV=5
683	Q5T1H1	1170	1191	1170	1191	PF12661.8	hEGF	Domain	1	22	22	26.4	7.8e-06	1	CL0001	sp|Q5T1H1|EYS_HUMAN Protein eyes shut homolog OS=Homo sapiens OX=9606 GN=EYS PE=1 SV=5
684	Q5T1H1	1911	2045	1911	2045	PF02210.25	Laminin_G_2	Domain	1	125	126	37.5	3.1e-09	1	CL0004	sp|Q5T1H1|EYS_HUMAN Protein eyes shut homolog OS=Homo sapiens OX=9606 GN=EYS PE=1 SV=5
685	Q5T1H1	2103	2137	2103	2138	PF00008.28	EGF	Domain	1	31	32	22.5	0.00011	1	CL0001	sp|Q5T1H1|EYS_HUMAN Protein eyes shut homolog OS=Homo sapiens OX=9606 GN=EYS PE=1 SV=5
686	Q5T1H1	2179	2317	2179	2317	PF02210.25	Laminin_G_2	Domain	1	126	126	34.3	3.1e-08	1	CL0004	sp|Q5T1H1|EYS_HUMAN Protein eyes shut homolog OS=Homo sapiens OX=9606 GN=EYS PE=1 SV=5
687	Q5T1H1	2460	2582	2455	2585	PF02210.25	Laminin_G_2	Domain	8	123	126	53.5	3.6e-14	1	CL0004	sp|Q5T1H1|EYS_HUMAN Protein eyes shut homolog OS=Homo sapiens OX=9606 GN=EYS PE=1 SV=5
688	Q5T1H1	2614	2643	2614	2644	PF00008.28	EGF	Domain	1	31	32	22.5	0.00011	1	CL0001	sp|Q5T1H1|EYS_HUMAN Protein eyes shut homolog OS=Homo sapiens OX=9606 GN=EYS PE=1 SV=5
689	Q5T1H1	2652	2687	2652	2687	PF00008.28	EGF	Domain	1	32	32	22.7	9.4e-05	1	CL0001	sp|Q5T1H1|EYS_HUMAN Protein eyes shut homolog OS=Homo sapiens OX=9606 GN=EYS PE=1 SV=5
690	Q5T1H1	2745	2877	2745	2877	PF02210.25	Laminin_G_2	Domain	1	126	126	76.2	3.4e-21	1	CL0004	sp|Q5T1H1|EYS_HUMAN Protein eyes shut homolog OS=Homo sapiens OX=9606 GN=EYS PE=1 SV=5
691	Q5T1H1	2905	2926	2905	2926	PF12661.8	hEGF	Domain	1	22	22	14	0.059	1	CL0001	sp|Q5T1H1|EYS_HUMAN Protein eyes shut homolog OS=Homo sapiens OX=9606 GN=EYS PE=1 SV=5
692	Q5T1H1	3007	3138	3007	3141	PF02210.25	Laminin_G_2	Domain	1	123	126	60	3.3e-16	1	CL0004	sp|Q5T1H1|EYS_HUMAN Protein eyes shut homolog OS=Homo sapiens OX=9606 GN=EYS PE=1 SV=5
693	O15230	46	298	45	298	PF00055.18	Laminin_N	Family	2	233	233	249.5	3.1e-74	1	CL0202	sp|O15230|LAMA5_HUMAN Laminin subunit alpha-5 OS=Homo sapiens OX=9606 GN=LAMA5 PE=1 SV=8
694	O15230	300	351	300	356	PF00053.25	Laminin_EGF	Domain	1	44	49	18	0.0025	1	CL0001	sp|O15230|LAMA5_HUMAN Laminin subunit alpha-5 OS=Homo sapiens OX=9606 GN=LAMA5 PE=1 SV=8
695	O15230	359	426	359	426	PF00053.25	Laminin_EGF	Domain	1	49	49	25.8	8.9e-06	1	CL0001	sp|O15230|LAMA5_HUMAN Laminin subunit alpha-5 OS=Homo sapiens OX=9606 GN=LAMA5 PE=1 SV=8
696	O15230	429	472	429	478	PF00053.25	Laminin_EGF	Domain	1	45	49	30.1	3.9e-07	1	CL0001	sp|O15230|LAMA5_HUMAN Laminin subunit alpha-5 OS=Homo sapiens OX=9606 GN=LAMA5 PE=1 SV=8
697	O15230	494	535	494	539	PF00053.25	Laminin_EGF	Domain	1	40	49	29.5	5.9e-07	1	CL0001	sp|O15230|LAMA5_HUMAN Laminin subunit alpha-5 OS=Homo sapiens OX=9606 GN=LAMA5 PE=1 SV=8
698	O15230	541	582	541	585	PF00053.25	Laminin_EGF	Domain	1	42	49	35.5	8.5e-09	1	CL0001	sp|O15230|LAMA5_HUMAN Laminin subunit alpha-5 OS=Homo sapiens OX=9606 GN=LAMA5 PE=1 SV=8
699	O15230	587	629	587	631	PF00053.25	Laminin_EGF	Domain	1	44	49	33.1	4.6e-08	1	CL0001	sp|O15230|LAMA5_HUMAN Laminin subunit alpha-5 OS=Homo sapiens OX=9606 GN=LAMA5 PE=1 SV=8
700	O15230	632	673	632	676	PF00053.25	Laminin_EGF	Domain	1	43	49	28.6	1.1e-06	1	CL0001	sp|O15230|LAMA5_HUMAN Laminin subunit alpha-5 OS=Homo sapiens OX=9606 GN=LAMA5 PE=1 SV=8
701	O15230	677	725	677	725	PF00053.25	Laminin_EGF	Domain	1	49	49	37.2	2.4e-09	1	CL0001	sp|O15230|LAMA5_HUMAN Laminin subunit alpha-5 OS=Homo sapiens OX=9606 GN=LAMA5 PE=1 SV=8
702	O15230	776	826	776	826	PF00053.25	Laminin_EGF	Domain	1	49	49	30.4	3.1e-07	1	CL0001	sp|O15230|LAMA5_HUMAN Laminin subunit alpha-5 OS=Homo sapiens OX=9606 GN=LAMA5 PE=1 SV=8
703	O15230	829	867	829	872	PF00053.25	Laminin_EGF	Domain	1	39	49	26.6	5.1e-06	1	CL0001	sp|O15230|LAMA5_HUMAN Laminin subunit alpha-5 OS=Homo sapiens OX=9606 GN=LAMA5 PE=1 SV=8
704	O15230	1438	1486	1438	1486	PF00053.25	Laminin_EGF	Domain	1	49	49	37.3	2.3e-09	1	CL0001	sp|O15230|LAMA5_HUMAN Laminin subunit alpha-5 OS=Homo sapiens OX=9606 GN=LAMA5 PE=1 SV=8
705	O15230	1528	1573	1528	1576	PF00053.25	Laminin_EGF	Domain	1	43	49	34.5	1.7e-08	1	CL0001	sp|O15230|LAMA5_HUMAN Laminin subunit alpha-5 OS=Homo sapiens OX=9606 GN=LAMA5 PE=1 SV=8
706	O15230	1577	1625	1577	1625	PF00053.25	Laminin_EGF	Domain	1	49	49	41	1.5e-10	1	CL0001	sp|O15230|LAMA5_HUMAN Laminin subunit alpha-5 OS=Homo sapiens OX=9606 GN=LAMA5 PE=1 SV=8
707	O15230	1693	1829	1693	1829	PF00052.19	Laminin_B	Family	1	135	135	120.1	6e-35	1	CL0202	sp|O15230|LAMA5_HUMAN Laminin subunit alpha-5 OS=Homo sapiens OX=9606 GN=LAMA5 PE=1 SV=8
708	O15230	1830	1852	1825	1859	PF00053.25	Laminin_EGF	Domain	19	41	49	18.1	0.0022	1	CL0001	sp|O15230|LAMA5_HUMAN Laminin subunit alpha-5 OS=Homo sapiens OX=9606 GN=LAMA5 PE=1 SV=8
709	O15230	1864	1910	1864	1910	PF00053.25	Laminin_EGF	Domain	1	49	49	30.7	2.5e-07	1	CL0001	sp|O15230|LAMA5_HUMAN Laminin subunit alpha-5 OS=Homo sapiens OX=9606 GN=LAMA5 PE=1 SV=8
710	O15230	1913	1966	1913	1966	PF00053.25	Laminin_EGF	Domain	1	49	49	29.9	4.6e-07	1	CL0001	sp|O15230|LAMA5_HUMAN Laminin subunit alpha-5 OS=Homo sapiens OX=9606 GN=LAMA5 PE=1 SV=8
711	O15230	1969	2020	1969	2020	PF00053.25	Laminin_EGF	Domain	1	49	49	37.5	1.9e-09	1	CL0001	sp|O15230|LAMA5_HUMAN Laminin subunit alpha-5 OS=Homo sapiens OX=9606 GN=LAMA5 PE=1 SV=8
712	O15230	2023	2063	2023	2067	PF00053.25	Laminin_EGF	Domain	1	45	49	25.8	8.8e-06	1	CL0001	sp|O15230|LAMA5_HUMAN Laminin subunit alpha-5 OS=Homo sapiens OX=9606 GN=LAMA5 PE=1 SV=8
713	O15230	2070	2117	2070	2119	PF00053.25	Laminin_EGF	Domain	1	49	49	35.1	1.1e-08	1	CL0001	sp|O15230|LAMA5_HUMAN Laminin subunit alpha-5 OS=Homo sapiens OX=9606 GN=LAMA5 PE=1 SV=8
714	O15230	2192	2450	2192	2451	PF06008.15	Laminin_I	Coiled-coil	1	258	259	279.8	2.4e-83	1	No_clan	sp|O15230|LAMA5_HUMAN Laminin subunit alpha-5 OS=Homo sapiens OX=9606 GN=LAMA5 PE=1 SV=8
715	O15230	2632	2762	2632	2762	PF06009.13	Laminin_II	Coiled-coil	1	138	138	135.3	1.4e-39	1	No_clan	sp|O15230|LAMA5_HUMAN Laminin subunit alpha-5 OS=Homo sapiens OX=9606 GN=LAMA5 PE=1 SV=8
716	O15230	2782	2902	2777	2908	PF02210.25	Laminin_G_2	Domain	10	120	126	27.1	5.3e-06	1	CL0004	sp|O15230|LAMA5_HUMAN Laminin subunit alpha-5 OS=Homo sapiens OX=9606 GN=LAMA5 PE=1 SV=8
717	O15230	2971	3096	2970	3099	PF02210.25	Laminin_G_2	Domain	2	123	126	30.6	4.3e-07	1	CL0004	sp|O15230|LAMA5_HUMAN Laminin subunit alpha-5 OS=Homo sapiens OX=9606 GN=LAMA5 PE=1 SV=8
718	O15230	3372	3498	3370	3499	PF02210.25	Laminin_G_2	Domain	3	125	126	62.4	6.4e-17	1	CL0004	sp|O15230|LAMA5_HUMAN Laminin subunit alpha-5 OS=Homo sapiens OX=9606 GN=LAMA5 PE=1 SV=8
719	O15230	3550	3671	3549	3673	PF02210.25	Laminin_G_2	Domain	2	124	126	63.6	2.7e-17	1	CL0004	sp|O15230|LAMA5_HUMAN Laminin subunit alpha-5 OS=Homo sapiens OX=9606 GN=LAMA5 PE=1 SV=8
720	Q02817	37	185	37	186	PF00094.26	VWD	Family	1	156	157	100.2	1.4e-28	1	No_clan	sp|Q02817|MUC2_HUMAN Mucin-2 OS=Homo sapiens OX=9606 GN=MUC2 PE=1 SV=2
721	Q02817	225	291	224	291	PF08742.12	C8	Domain	2	69	69	52.2	5.9e-14	1	No_clan	sp|Q02817|MUC2_HUMAN Mucin-2 OS=Homo sapiens OX=9606 GN=MUC2 PE=1 SV=2
722	Q02817	295	351	295	351	PF01826.18	TIL	Domain	1	55	55	36.5	4.2e-09	1	No_clan	sp|Q02817|MUC2_HUMAN Mucin-2 OS=Homo sapiens OX=9606 GN=MUC2 PE=1 SV=2
723	Q02817	391	544	391	545	PF00094.26	VWD	Family	1	156	157	118.1	4.3e-34	1	No_clan	sp|Q02817|MUC2_HUMAN Mucin-2 OS=Homo sapiens OX=9606 GN=MUC2 PE=1 SV=2
724	Q02817	587	652	587	654	PF08742.12	C8	Domain	1	66	69	67.3	1.1e-18	1	No_clan	sp|Q02817|MUC2_HUMAN Mucin-2 OS=Homo sapiens OX=9606 GN=MUC2 PE=1 SV=2
725	Q02817	860	1008	860	1009	PF00094.26	VWD	Family	1	156	157	112.6	2.1e-32	1	No_clan	sp|Q02817|MUC2_HUMAN Mucin-2 OS=Homo sapiens OX=9606 GN=MUC2 PE=1 SV=2
726	Q02817	1050	1117	1050	1117	PF08742.12	C8	Domain	1	69	69	65.8	3.4e-18	1	No_clan	sp|Q02817|MUC2_HUMAN Mucin-2 OS=Homo sapiens OX=9606 GN=MUC2 PE=1 SV=2
727	Q02817	1305	1388	1305	1388	PF13330.7	Mucin2_WxxW	Family	1	92	92	65.3	7e-18	1	No_clan	sp|Q02817|MUC2_HUMAN Mucin-2 OS=Homo sapiens OX=9606 GN=MUC2 PE=1 SV=2
728	Q02817	1788	1875	1788	1875	PF13330.7	Mucin2_WxxW	Family	1	92	92	48.3	1.4e-12	1	No_clan	sp|Q02817|MUC2_HUMAN Mucin-2 OS=Homo sapiens OX=9606 GN=MUC2 PE=1 SV=2
729	Q02817	4481	4638	4481	4639	PF00094.26	VWD	Family	1	156	157	114.7	4.8e-33	1	No_clan	sp|Q02817|MUC2_HUMAN Mucin-2 OS=Homo sapiens OX=9606 GN=MUC2 PE=1 SV=2
730	Q02817	4693	4754	4692	4758	PF08742.12	C8	Domain	2	67	69	59.4	3.4e-16	1	No_clan	sp|Q02817|MUC2_HUMAN Mucin-2 OS=Homo sapiens OX=9606 GN=MUC2 PE=1 SV=2
731	Q6ZWJ8	138	192	138	192	PF00093.19	VWC	Family	1	57	57	39.4	5.6e-10	1	CL0451	sp|Q6ZWJ8|KCP_HUMAN Kielin/chordin-like protein OS=Homo sapiens OX=9606 GN=KCP PE=2 SV=3
732	Q6ZWJ8	196	252	196	252	PF00093.19	VWC	Family	1	57	57	40.2	3.1e-10	1	CL0451	sp|Q6ZWJ8|KCP_HUMAN Kielin/chordin-like protein OS=Homo sapiens OX=9606 GN=KCP PE=2 SV=3
733	Q6ZWJ8	255	311	255	311	PF00093.19	VWC	Family	1	57	57	32.1	1.1e-07	1	CL0451	sp|Q6ZWJ8|KCP_HUMAN Kielin/chordin-like protein OS=Homo sapiens OX=9606 GN=KCP PE=2 SV=3
734	Q6ZWJ8	314	369	314	369	PF00093.19	VWC	Family	1	57	57	33	5.8e-08	1	CL0451	sp|Q6ZWJ8|KCP_HUMAN Kielin/chordin-like protein OS=Homo sapiens OX=9606 GN=KCP PE=2 SV=3
735	Q6ZWJ8	428	484	428	484	PF00093.19	VWC	Family	1	57	57	34.7	1.6e-08	1	CL0451	sp|Q6ZWJ8|KCP_HUMAN Kielin/chordin-like protein OS=Homo sapiens OX=9606 GN=KCP PE=2 SV=3
736	Q6ZWJ8	487	543	487	543	PF00093.19	VWC	Family	1	57	57	35.1	1.2e-08	1	CL0451	sp|Q6ZWJ8|KCP_HUMAN Kielin/chordin-like protein OS=Homo sapiens OX=9606 GN=KCP PE=2 SV=3
737	Q6ZWJ8	604	660	604	660	PF00093.19	VWC	Family	1	57	57	36.4	4.8e-09	1	CL0451	sp|Q6ZWJ8|KCP_HUMAN Kielin/chordin-like protein OS=Homo sapiens OX=9606 GN=KCP PE=2 SV=3
738	Q6ZWJ8	902	958	902	958	PF00093.19	VWC	Family	1	57	57	30.6	3.1e-07	1	CL0451	sp|Q6ZWJ8|KCP_HUMAN Kielin/chordin-like protein OS=Homo sapiens OX=9606 GN=KCP PE=2 SV=3
739	Q6ZWJ8	1151	1208	1151	1208	PF00093.19	VWC	Family	1	57	57	36.9	3.4e-09	1	CL0451	sp|Q6ZWJ8|KCP_HUMAN Kielin/chordin-like protein OS=Homo sapiens OX=9606 GN=KCP PE=2 SV=3
740	Q6ZWJ8	1215	1363	1215	1364	PF00094.26	VWD	Family	1	156	157	126.9	8.4e-37	1	No_clan	sp|Q6ZWJ8|KCP_HUMAN Kielin/chordin-like protein OS=Homo sapiens OX=9606 GN=KCP PE=2 SV=3
741	Q3ZCN5	114	260	114	264	PF00094.26	VWD	Family	1	152	157	92.9	2.5e-26	1	No_clan	sp|Q3ZCN5|OTOGL_HUMAN Otogelin-like protein OS=Homo sapiens OX=9606 GN=OTOGL PE=2 SV=5
742	Q3ZCN5	311	373	311	377	PF08742.12	C8	Domain	1	66	69	57.7	1.1e-15	1	No_clan	sp|Q3ZCN5|OTOGL_HUMAN Otogelin-like protein OS=Homo sapiens OX=9606 GN=OTOGL PE=2 SV=5
743	Q3ZCN5	474	626	474	626	PF00094.26	VWD	Family	1	157	157	95.7	3.3e-27	1	No_clan	sp|Q3ZCN5|OTOGL_HUMAN Otogelin-like protein OS=Homo sapiens OX=9606 GN=OTOGL PE=2 SV=5
744	Q3ZCN5	668	732	668	732	PF08742.12	C8	Domain	1	69	69	48	1.2e-12	1	No_clan	sp|Q3ZCN5|OTOGL_HUMAN Otogelin-like protein OS=Homo sapiens OX=9606 GN=OTOGL PE=2 SV=5
745	Q3ZCN5	736	791	736	791	PF01826.18	TIL	Domain	1	55	55	32.5	7.7e-08	1	No_clan	sp|Q3ZCN5|OTOGL_HUMAN Otogelin-like protein OS=Homo sapiens OX=9606 GN=OTOGL PE=2 SV=5
746	Q3ZCN5	939	1085	939	1086	PF00094.26	VWD	Family	1	156	157	85.1	5.9e-24	1	No_clan	sp|Q3ZCN5|OTOGL_HUMAN Otogelin-like protein OS=Homo sapiens OX=9606 GN=OTOGL PE=2 SV=5
747	Q3ZCN5	1127	1193	1126	1193	PF08742.12	C8	Domain	2	69	69	50.7	1.8e-13	1	No_clan	sp|Q3ZCN5|OTOGL_HUMAN Otogelin-like protein OS=Homo sapiens OX=9606 GN=OTOGL PE=2 SV=5
748	Q3ZCN5	1245	1349	1231	1350	PF05270.14	AbfB	Domain	39	140	141	28.6	1.2e-06	1	CL0066	sp|Q3ZCN5|OTOGL_HUMAN Otogelin-like protein OS=Homo sapiens OX=9606 GN=OTOGL PE=2 SV=5
749	Q3ZCN5	1515	1679	1515	1679	PF00094.26	VWD	Family	1	157	157	50	4e-13	1	No_clan	sp|Q3ZCN5|OTOGL_HUMAN Otogelin-like protein OS=Homo sapiens OX=9606 GN=OTOGL PE=2 SV=5
750	Q3ZCN5	1719	1781	1716	1781	PF08742.12	C8	Domain	2	69	69	30.9	2.7e-07	1	No_clan	sp|Q3ZCN5|OTOGL_HUMAN Otogelin-like protein OS=Homo sapiens OX=9606 GN=OTOGL PE=2 SV=5
751	Q99466	35	57	35	57	PF12661.8	hEGF	Domain	1	22	22	18.2	0.0028	1	CL0001	sp|Q99466|NOTC4_HUMAN Neurogenic locus notch homolog protein 4 OS=Homo sapiens OX=9606 GN=NOTCH4 PE=1 SV=2
752	Q99466	127	149	127	149	PF12661.8	hEGF	Domain	1	22	22	16.2	0.012	1	CL0001	sp|Q99466|NOTC4_HUMAN Neurogenic locus notch homolog protein 4 OS=Homo sapiens OX=9606 GN=NOTCH4 PE=1 SV=2
753	Q99466	160	188	160	189	PF00008.28	EGF	Domain	1	30	32	21.8	0.00017	1	CL0001	sp|Q99466|NOTC4_HUMAN Neurogenic locus notch homolog protein 4 OS=Homo sapiens OX=9606 GN=NOTCH4 PE=1 SV=2
754	Q99466	194	227	194	238	PF07645.16	EGF_CA	Domain	1	34	42	36.4	4.4e-09	1	CL0001	sp|Q99466|NOTC4_HUMAN Neurogenic locus notch homolog protein 4 OS=Homo sapiens OX=9606 GN=NOTCH4 PE=1 SV=2
755	Q99466	238	271	238	272	PF00008.28	EGF	Domain	1	31	32	23	7.2e-05	1	CL0001	sp|Q99466|NOTC4_HUMAN Neurogenic locus notch homolog protein 4 OS=Homo sapiens OX=9606 GN=NOTCH4 PE=1 SV=2
756	Q99466	280	308	280	308	PF00008.28	EGF	Domain	1	30	32	25.7	1.1e-05	1	CL0001	sp|Q99466|NOTC4_HUMAN Neurogenic locus notch homolog protein 4 OS=Homo sapiens OX=9606 GN=NOTCH4 PE=1 SV=2
757	Q99466	314	350	314	356	PF07645.16	EGF_CA	Domain	1	35	42	35.7	7.5e-09	1	CL0001	sp|Q99466|NOTC4_HUMAN Neurogenic locus notch homolog protein 4 OS=Homo sapiens OX=9606 GN=NOTCH4 PE=1 SV=2
758	Q99466	364	384	364	385	PF12661.8	hEGF	Domain	1	21	22	22.3	0.00015	1	CL0001	sp|Q99466|NOTC4_HUMAN Neurogenic locus notch homolog protein 4 OS=Homo sapiens OX=9606 GN=NOTCH4 PE=1 SV=2
759	Q99466	432	468	432	474	PF07645.16	EGF_CA	Domain	1	34	42	35.2	1.1e-08	1	CL0001	sp|Q99466|NOTC4_HUMAN Neurogenic locus notch homolog protein 4 OS=Homo sapiens OX=9606 GN=NOTCH4 PE=1 SV=2
760	Q99466	479	507	479	509	PF00008.28	EGF	Domain	1	30	32	21.7	0.00018	1	CL0001	sp|Q99466|NOTC4_HUMAN Neurogenic locus notch homolog protein 4 OS=Homo sapiens OX=9606 GN=NOTCH4 PE=1 SV=2
761	Q99466	517	547	517	547	PF00008.28	EGF	Domain	1	32	32	27.9	2.2e-06	1	CL0001	sp|Q99466|NOTC4_HUMAN Neurogenic locus notch homolog protein 4 OS=Homo sapiens OX=9606 GN=NOTCH4 PE=1 SV=2
762	Q99466	551	584	551	590	PF07645.16	EGF_CA	Domain	1	35	42	24.8	1.9e-05	1	CL0001	sp|Q99466|NOTC4_HUMAN Neurogenic locus notch homolog protein 4 OS=Homo sapiens OX=9606 GN=NOTCH4 PE=1 SV=2
763	Q99466	593	621	593	623	PF00008.28	EGF	Domain	1	30	32	26.2	7.4e-06	1	CL0001	sp|Q99466|NOTC4_HUMAN Neurogenic locus notch homolog protein 4 OS=Homo sapiens OX=9606 GN=NOTCH4 PE=1 SV=2
764	Q99466	771	801	771	801	PF00008.28	EGF	Domain	1	32	32	35.5	9.2e-09	1	CL0001	sp|Q99466|NOTC4_HUMAN Neurogenic locus notch homolog protein 4 OS=Homo sapiens OX=9606 GN=NOTCH4 PE=1 SV=2
765	Q99466	810	838	810	838	PF00008.28	EGF	Domain	1	30	32	27.2	3.6e-06	1	CL0001	sp|Q99466|NOTC4_HUMAN Neurogenic locus notch homolog protein 4 OS=Homo sapiens OX=9606 GN=NOTCH4 PE=1 SV=2
766	Q99466	848	875	845	886	PF07645.16	EGF_CA	Domain	5	34	42	17.4	0.004	1	CL0001	sp|Q99466|NOTC4_HUMAN Neurogenic locus notch homolog protein 4 OS=Homo sapiens OX=9606 GN=NOTCH4 PE=1 SV=2
767	Q99466	901	925	896	926	PF00008.28	EGF	Domain	6	31	32	31.6	1.5e-07	1	CL0001	sp|Q99466|NOTC4_HUMAN Neurogenic locus notch homolog protein 4 OS=Homo sapiens OX=9606 GN=NOTCH4 PE=1 SV=2
768	Q99466	934	963	934	964	PF00008.28	EGF	Domain	1	31	32	30.6	3e-07	1	CL0001	sp|Q99466|NOTC4_HUMAN Neurogenic locus notch homolog protein 4 OS=Homo sapiens OX=9606 GN=NOTCH4 PE=1 SV=2
769	Q99466	972	1002	972	1002	PF00008.28	EGF	Domain	1	32	32	30.6	3.1e-07	1	CL0001	sp|Q99466|NOTC4_HUMAN Neurogenic locus notch homolog protein 4 OS=Homo sapiens OX=9606 GN=NOTCH4 PE=1 SV=2
770	Q99466	1050	1083	1050	1083	PF00008.28	EGF	Domain	1	32	32	22.1	0.00014	1	CL0001	sp|Q99466|NOTC4_HUMAN Neurogenic locus notch homolog protein 4 OS=Homo sapiens OX=9606 GN=NOTCH4 PE=1 SV=2
771	Q99466	1168	1204	1167	1204	PF00066.18	Notch	Domain	2	36	36	31.8	1.5e-07	1	No_clan	sp|Q99466|NOTC4_HUMAN Neurogenic locus notch homolog protein 4 OS=Homo sapiens OX=9606 GN=NOTCH4 PE=1 SV=2
772	Q99466	1211	1246	1211	1246	PF00066.18	Notch	Domain	1	36	36	39.4	6e-10	1	No_clan	sp|Q99466|NOTC4_HUMAN Neurogenic locus notch homolog protein 4 OS=Homo sapiens OX=9606 GN=NOTCH4 PE=1 SV=2
773	Q99466	1249	1284	1248	1285	PF00066.18	Notch	Domain	2	35	36	44.9	1.2e-11	1	No_clan	sp|Q99466|NOTC4_HUMAN Neurogenic locus notch homolog protein 4 OS=Homo sapiens OX=9606 GN=NOTCH4 PE=1 SV=2
774	Q99466	1297	1343	1295	1344	PF06816.14	NOD	Family	9	55	56	20.8	0.0002	1	No_clan	sp|Q99466|NOTC4_HUMAN Neurogenic locus notch homolog protein 4 OS=Homo sapiens OX=9606 GN=NOTCH4 PE=1 SV=2
775	Q99466	1379	1435	1378	1440	PF07684.13	NODP	Family	2	54	59	29.7	5.4e-07	1	No_clan	sp|Q99466|NOTC4_HUMAN Neurogenic locus notch homolog protein 4 OS=Homo sapiens OX=9606 GN=NOTCH4 PE=1 SV=2
776	Q99466	1638	1731	1638	1731	PF12796.8	Ank_2	Repeat	1	83	83	50.5	2.4e-13	1	CL0465	sp|Q99466|NOTC4_HUMAN Neurogenic locus notch homolog protein 4 OS=Homo sapiens OX=9606 GN=NOTCH4 PE=1 SV=2
777	Q99466	1734	1765	1733	1765	PF00023.31	Ank	Repeat	2	33	33	18.8	0.0016	1	CL0465	sp|Q99466|NOTC4_HUMAN Neurogenic locus notch homolog protein 4 OS=Homo sapiens OX=9606 GN=NOTCH4 PE=1 SV=2
778	Q6ZRI0	152	302	152	302	PF00094.26	VWD	Family	1	157	157	107.4	8.3e-31	1	No_clan	sp|Q6ZRI0|OTOG_HUMAN Otogelin OS=Homo sapiens OX=9606 GN=OTOG PE=1 SV=3
779	Q6ZRI0	349	413	349	416	PF08742.12	C8	Domain	1	67	69	58	9.7e-16	1	No_clan	sp|Q6ZRI0|OTOG_HUMAN Otogelin OS=Homo sapiens OX=9606 GN=OTOG PE=1 SV=3
780	Q6ZRI0	514	668	514	669	PF00094.26	VWD	Family	1	156	157	128.1	3.6e-37	1	No_clan	sp|Q6ZRI0|OTOG_HUMAN Otogelin OS=Homo sapiens OX=9606 GN=OTOG PE=1 SV=3
781	Q6ZRI0	713	772	712	776	PF08742.12	C8	Domain	2	66	69	46.2	4.5e-12	1	No_clan	sp|Q6ZRI0|OTOG_HUMAN Otogelin OS=Homo sapiens OX=9606 GN=OTOG PE=1 SV=3
782	Q6ZRI0	780	844	780	844	PF01826.18	TIL	Domain	1	55	55	38.3	1.2e-09	1	No_clan	sp|Q6ZRI0|OTOG_HUMAN Otogelin OS=Homo sapiens OX=9606 GN=OTOG PE=1 SV=3
783	Q6ZRI0	986	1131	986	1132	PF00094.26	VWD	Family	1	156	157	94.7	6.6e-27	1	No_clan	sp|Q6ZRI0|OTOG_HUMAN Otogelin OS=Homo sapiens OX=9606 GN=OTOG PE=1 SV=3
784	Q6ZRI0	1173	1239	1172	1239	PF08742.12	C8	Domain	2	69	69	57.8	1.1e-15	1	No_clan	sp|Q6ZRI0|OTOG_HUMAN Otogelin OS=Homo sapiens OX=9606 GN=OTOG PE=1 SV=3
785	Q6ZRI0	1305	1390	1277	1396	PF05270.14	AbfB	Domain	48	135	141	28.8	1e-06	1	CL0066	sp|Q6ZRI0|OTOG_HUMAN Otogelin OS=Homo sapiens OX=9606 GN=OTOG PE=1 SV=3
786	Q6ZRI0	2112	2265	2112	2266	PF00094.26	VWD	Family	1	156	157	77.6	1.3e-21	1	No_clan	sp|Q6ZRI0|OTOG_HUMAN Otogelin OS=Homo sapiens OX=9606 GN=OTOG PE=1 SV=3
787	Q6ZRI0	2309	2369	2305	2369	PF08742.12	C8	Domain	3	69	69	26.5	6.2e-06	1	No_clan	sp|Q6ZRI0|OTOG_HUMAN Otogelin OS=Homo sapiens OX=9606 GN=OTOG PE=1 SV=3
788	Q9NY15	384	490	375	493	PF02469.23	Fasciclin	Domain	12	122	128	25.2	1.5e-05	1	No_clan	sp|Q9NY15|STAB1_HUMAN Stabilin-1 OS=Homo sapiens OX=9606 GN=STAB1 PE=1 SV=3
789	Q9NY15	518	643	517	643	PF02469.23	Fasciclin	Domain	2	128	128	63.7	1.9e-17	1	No_clan	sp|Q9NY15|STAB1_HUMAN Stabilin-1 OS=Homo sapiens OX=9606 GN=STAB1 PE=1 SV=3
790	Q9NY15	913	945	908	945	PF12947.8	EGF_3	Domain	5	36	36	30.4	3.1e-07	1	CL0001	sp|Q9NY15|STAB1_HUMAN Stabilin-1 OS=Homo sapiens OX=9606 GN=STAB1 PE=1 SV=3
791	Q9NY15	951	987	951	987	PF12947.8	EGF_3	Domain	1	36	36	32.8	5.6e-08	1	CL0001	sp|Q9NY15|STAB1_HUMAN Stabilin-1 OS=Homo sapiens OX=9606 GN=STAB1 PE=1 SV=3
792	Q9NY15	1000	1120	999	1120	PF02469.23	Fasciclin	Domain	2	128	128	59.6	3.7e-16	1	No_clan	sp|Q9NY15|STAB1_HUMAN Stabilin-1 OS=Homo sapiens OX=9606 GN=STAB1 PE=1 SV=3
793	Q9NY15	1140	1230	1139	1253	PF02469.23	Fasciclin	Domain	2	102	128	24.2	3.2e-05	1	No_clan	sp|Q9NY15|STAB1_HUMAN Stabilin-1 OS=Homo sapiens OX=9606 GN=STAB1 PE=1 SV=3
794	Q9NY15	1459	1495	1459	1495	PF12947.8	EGF_3	Domain	1	36	36	35.3	9.5e-09	1	CL0001	sp|Q9NY15|STAB1_HUMAN Stabilin-1 OS=Homo sapiens OX=9606 GN=STAB1 PE=1 SV=3
795	Q9NY15	1501	1535	1501	1538	PF12947.8	EGF_3	Domain	1	34	36	32.5	7e-08	1	CL0001	sp|Q9NY15|STAB1_HUMAN Stabilin-1 OS=Homo sapiens OX=9606 GN=STAB1 PE=1 SV=3
796	Q9NY15	1544	1581	1544	1581	PF12947.8	EGF_3	Domain	1	36	36	29.4	6.8e-07	1	CL0001	sp|Q9NY15|STAB1_HUMAN Stabilin-1 OS=Homo sapiens OX=9606 GN=STAB1 PE=1 SV=3
797	Q9NY15	1606	1710	1596	1710	PF02469.23	Fasciclin	Domain	17	128	128	64	1.5e-17	1	No_clan	sp|Q9NY15|STAB1_HUMAN Stabilin-1 OS=Homo sapiens OX=9606 GN=STAB1 PE=1 SV=3
798	Q9NY15	1737	1866	1735	1866	PF02469.23	Fasciclin	Domain	3	128	128	67.4	1.4e-18	1	No_clan	sp|Q9NY15|STAB1_HUMAN Stabilin-1 OS=Homo sapiens OX=9606 GN=STAB1 PE=1 SV=3
799	Q9NY15	2095	2130	2095	2130	PF12947.8	EGF_3	Domain	1	36	36	34.2	2.1e-08	1	CL0001	sp|Q9NY15|STAB1_HUMAN Stabilin-1 OS=Homo sapiens OX=9606 GN=STAB1 PE=1 SV=3
800	Q9NY15	2209	2300	2208	2300	PF00193.18	Xlink	Domain	2	93	93	95.5	1.9e-27	1	CL0056	sp|Q9NY15|STAB1_HUMAN Stabilin-1 OS=Homo sapiens OX=9606 GN=STAB1 PE=1 SV=3
801	Q8WWQ8	245	275	243	275	PF12947.8	EGF_3	Domain	7	36	36	30.9	2.2e-07	1	CL0001	sp|Q8WWQ8|STAB2_HUMAN Stabilin-2 OS=Homo sapiens OX=9606 GN=STAB2 PE=1 SV=3
802	Q8WWQ8	383	505	382	507	PF02469.23	Fasciclin	Domain	2	126	128	51.3	1.3e-13	1	No_clan	sp|Q8WWQ8|STAB2_HUMAN Stabilin-2 OS=Homo sapiens OX=9606 GN=STAB2 PE=1 SV=3
803	Q8WWQ8	527	654	526	654	PF02469.23	Fasciclin	Domain	2	128	128	66	3.7e-18	1	No_clan	sp|Q8WWQ8|STAB2_HUMAN Stabilin-2 OS=Homo sapiens OX=9606 GN=STAB2 PE=1 SV=3
804	Q8WWQ8	957	993	957	993	PF12947.8	EGF_3	Domain	1	36	36	32.5	6.9e-08	1	CL0001	sp|Q8WWQ8|STAB2_HUMAN Stabilin-2 OS=Homo sapiens OX=9606 GN=STAB2 PE=1 SV=3
805	Q8WWQ8	1008	1129	1005	1129	PF02469.23	Fasciclin	Domain	4	128	128	80.1	1.6e-22	1	No_clan	sp|Q8WWQ8|STAB2_HUMAN Stabilin-2 OS=Homo sapiens OX=9606 GN=STAB2 PE=1 SV=3
806	Q8WWQ8	1149	1265	1148	1267	PF02469.23	Fasciclin	Domain	2	126	128	55.1	8.5e-15	1	No_clan	sp|Q8WWQ8|STAB2_HUMAN Stabilin-2 OS=Homo sapiens OX=9606 GN=STAB2 PE=1 SV=3
807	Q8WWQ8	1475	1511	1475	1511	PF12947.8	EGF_3	Domain	1	36	36	36.7	3.4e-09	1	CL0001	sp|Q8WWQ8|STAB2_HUMAN Stabilin-2 OS=Homo sapiens OX=9606 GN=STAB2 PE=1 SV=3
808	Q8WWQ8	1517	1553	1517	1553	PF12947.8	EGF_3	Domain	1	36	36	31.1	1.9e-07	1	CL0001	sp|Q8WWQ8|STAB2_HUMAN Stabilin-2 OS=Homo sapiens OX=9606 GN=STAB2 PE=1 SV=3
809	Q8WWQ8	1559	1595	1559	1595	PF12947.8	EGF_3	Domain	1	36	36	34.5	1.7e-08	1	CL0001	sp|Q8WWQ8|STAB2_HUMAN Stabilin-2 OS=Homo sapiens OX=9606 GN=STAB2 PE=1 SV=3
810	Q8WWQ8	1618	1726	1608	1726	PF02469.23	Fasciclin	Domain	13	128	128	67	1.8e-18	1	No_clan	sp|Q8WWQ8|STAB2_HUMAN Stabilin-2 OS=Homo sapiens OX=9606 GN=STAB2 PE=1 SV=3
811	Q8WWQ8	1754	1882	1751	1883	PF02469.23	Fasciclin	Domain	4	127	128	73.6	1.7e-20	1	No_clan	sp|Q8WWQ8|STAB2_HUMAN Stabilin-2 OS=Homo sapiens OX=9606 GN=STAB2 PE=1 SV=3
812	Q8WWQ8	2086	2121	2086	2121	PF12947.8	EGF_3	Domain	1	36	36	29.8	4.9e-07	1	CL0001	sp|Q8WWQ8|STAB2_HUMAN Stabilin-2 OS=Homo sapiens OX=9606 GN=STAB2 PE=1 SV=3
813	Q8WWQ8	2132	2164	2127	2164	PF12947.8	EGF_3	Domain	5	36	36	32.4	7.7e-08	1	CL0001	sp|Q8WWQ8|STAB2_HUMAN Stabilin-2 OS=Homo sapiens OX=9606 GN=STAB2 PE=1 SV=3
814	Q8WWQ8	2199	2290	2198	2290	PF00193.18	Xlink	Domain	2	93	93	97.5	4.7e-28	1	CL0056	sp|Q8WWQ8|STAB2_HUMAN Stabilin-2 OS=Homo sapiens OX=9606 GN=STAB2 PE=1 SV=3
815	Q8WWQ8	2355	2446	2333	2449	PF02469.23	Fasciclin	Domain	26	126	128	23.1	7.1e-05	1	No_clan	sp|Q8WWQ8|STAB2_HUMAN Stabilin-2 OS=Homo sapiens OX=9606 GN=STAB2 PE=1 SV=3
816	Q86XX4	95	152	95	152	PF00093.19	VWC	Family	1	57	57	38.2	1.3e-09	1	CL0451	sp|Q86XX4|FRAS1_HUMAN Extracellular matrix protein FRAS1 OS=Homo sapiens OX=9606 GN=FRAS1 PE=1 SV=2
817	Q86XX4	159	216	159	216	PF00093.19	VWC	Family	1	57	57	32.8	6.3e-08	1	CL0451	sp|Q86XX4|FRAS1_HUMAN Extracellular matrix protein FRAS1 OS=Homo sapiens OX=9606 GN=FRAS1 PE=1 SV=2
818	Q86XX4	221	278	221	278	PF00093.19	VWC	Family	1	57	57	35.8	7.7e-09	1	CL0451	sp|Q86XX4|FRAS1_HUMAN Extracellular matrix protein FRAS1 OS=Homo sapiens OX=9606 GN=FRAS1 PE=1 SV=2
819	Q86XX4	285	342	285	342	PF00093.19	VWC	Family	1	57	57	29	9.7e-07	1	CL0451	sp|Q86XX4|FRAS1_HUMAN Extracellular matrix protein FRAS1 OS=Homo sapiens OX=9606 GN=FRAS1 PE=1 SV=2
820	Q86XX4	1102	1198	1099	1199	PF16184.6	Cadherin_3	Domain	18	110	111	42.8	4.1e-11	1	CL0159	sp|Q86XX4|FRAS1_HUMAN Extracellular matrix protein FRAS1 OS=Homo sapiens OX=9606 GN=FRAS1 PE=1 SV=2
821	Q86XX4	1208	1310	1203	1310	PF16184.6	Cadherin_3	Domain	9	111	111	72.1	3.2e-20	1	CL0159	sp|Q86XX4|FRAS1_HUMAN Extracellular matrix protein FRAS1 OS=Homo sapiens OX=9606 GN=FRAS1 PE=1 SV=2
822	Q86XX4	1315	1438	1313	1439	PF16184.6	Cadherin_3	Domain	4	109	111	47.3	1.7e-12	1	CL0159	sp|Q86XX4|FRAS1_HUMAN Extracellular matrix protein FRAS1 OS=Homo sapiens OX=9606 GN=FRAS1 PE=1 SV=2
823	Q86XX4	1448	1542	1446	1574	PF16184.6	Cadherin_3	Domain	3	93	111	45.4	6.7e-12	1	CL0159	sp|Q86XX4|FRAS1_HUMAN Extracellular matrix protein FRAS1 OS=Homo sapiens OX=9606 GN=FRAS1 PE=1 SV=2
824	Q86XX4	1578	1691	1577	1691	PF16184.6	Cadherin_3	Domain	2	111	111	48.7	6.3e-13	1	CL0159	sp|Q86XX4|FRAS1_HUMAN Extracellular matrix protein FRAS1 OS=Homo sapiens OX=9606 GN=FRAS1 PE=1 SV=2
825	Q86XX4	1698	1811	1694	1812	PF16184.6	Cadherin_3	Domain	6	110	111	38.7	8e-10	1	CL0159	sp|Q86XX4|FRAS1_HUMAN Extracellular matrix protein FRAS1 OS=Homo sapiens OX=9606 GN=FRAS1 PE=1 SV=2
826	Q86XX4	1818	1938	1816	1938	PF16184.6	Cadherin_3	Domain	3	111	111	35.5	7.7e-09	1	CL0159	sp|Q86XX4|FRAS1_HUMAN Extracellular matrix protein FRAS1 OS=Homo sapiens OX=9606 GN=FRAS1 PE=1 SV=2
827	Q86XX4	1943	2059	1941	2059	PF16184.6	Cadherin_3	Domain	3	111	111	57.7	1e-15	1	CL0159	sp|Q86XX4|FRAS1_HUMAN Extracellular matrix protein FRAS1 OS=Homo sapiens OX=9606 GN=FRAS1 PE=1 SV=2
828	Q86XX4	2076	2179	2067	2179	PF16184.6	Cadherin_3	Domain	15	111	111	61	9.4e-17	1	CL0159	sp|Q86XX4|FRAS1_HUMAN Extracellular matrix protein FRAS1 OS=Homo sapiens OX=9606 GN=FRAS1 PE=1 SV=2
829	Q86XX4	2187	2293	2184	2293	PF16184.6	Cadherin_3	Domain	5	111	111	93.9	5.8e-27	1	CL0159	sp|Q86XX4|FRAS1_HUMAN Extracellular matrix protein FRAS1 OS=Homo sapiens OX=9606 GN=FRAS1 PE=1 SV=2
830	Q86XX4	2297	2406	2295	2406	PF16184.6	Cadherin_3	Domain	3	111	111	101.9	1.9e-29	1	CL0159	sp|Q86XX4|FRAS1_HUMAN Extracellular matrix protein FRAS1 OS=Homo sapiens OX=9606 GN=FRAS1 PE=1 SV=2
831	Q86XX4	2425	2537	2422	2538	PF16184.6	Cadherin_3	Domain	4	110	111	72.4	2.7e-20	1	CL0159	sp|Q86XX4|FRAS1_HUMAN Extracellular matrix protein FRAS1 OS=Homo sapiens OX=9606 GN=FRAS1 PE=1 SV=2
832	Q86XX4	2554	2646	2547	2646	PF03160.15	Calx-beta	Domain	12	100	100	60.9	1e-16	1	CL0159	sp|Q86XX4|FRAS1_HUMAN Extracellular matrix protein FRAS1 OS=Homo sapiens OX=9606 GN=FRAS1 PE=1 SV=2
833	Q86XX4	2660	2769	2659	2770	PF03160.15	Calx-beta	Domain	2	99	100	35.3	9.9e-09	1	CL0159	sp|Q86XX4|FRAS1_HUMAN Extracellular matrix protein FRAS1 OS=Homo sapiens OX=9606 GN=FRAS1 PE=1 SV=2
834	Q86XX4	2788	2889	2784	2890	PF03160.15	Calx-beta	Domain	5	99	100	40.4	2.6e-10	1	CL0159	sp|Q86XX4|FRAS1_HUMAN Extracellular matrix protein FRAS1 OS=Homo sapiens OX=9606 GN=FRAS1 PE=1 SV=2
835	Q86XX4	2905	3006	2903	3007	PF03160.15	Calx-beta	Domain	3	99	100	40.5	2.3e-10	1	CL0159	sp|Q86XX4|FRAS1_HUMAN Extracellular matrix protein FRAS1 OS=Homo sapiens OX=9606 GN=FRAS1 PE=1 SV=2
836	Q86XX4	3026	3128	3025	3129	PF03160.15	Calx-beta	Domain	2	99	100	59.4	3.1e-16	1	CL0159	sp|Q86XX4|FRAS1_HUMAN Extracellular matrix protein FRAS1 OS=Homo sapiens OX=9606 GN=FRAS1 PE=1 SV=2
837	Q92824	38	114	38	114	PF16470.6	S8_pro-domain	Domain	1	79	79	86.4	1.6e-24	1	CL0570	sp|Q92824|PCSK5_HUMAN Proprotein convertase subtilisin/kexin type 5 OS=Homo sapiens OX=9606 GN=PCSK5 PE=1 SV=4
838	Q92824	162	445	162	445	PF00082.23	Peptidase_S8	Domain	1	277	277	159.6	9.3e-47	1	No_clan	sp|Q92824|PCSK5_HUMAN Proprotein convertase subtilisin/kexin type 5 OS=Homo sapiens OX=9606 GN=PCSK5 PE=1 SV=4
839	Q92824	505	594	505	595	PF01483.21	P_proprotein	Family	1	85	86	106.2	6.7e-31	1	CL0202	sp|Q92824|PCSK5_HUMAN Proprotein convertase subtilisin/kexin type 5 OS=Homo sapiens OX=9606 GN=PCSK5 PE=1 SV=4
840	Q92824	636	750	635	756	PF14843.7	GF_recep_IV	Domain	2	126	132	37.5	1.8e-09	1	CL0547	sp|Q92824|PCSK5_HUMAN Proprotein convertase subtilisin/kexin type 5 OS=Homo sapiens OX=9606 GN=PCSK5 PE=1 SV=4
841	Q7Z7M0	47	137	30	137	PF00431.21	CUB	Domain	17	110	110	53.5	2.6e-14	1	CL0164	sp|Q7Z7M0|MEGF8_HUMAN Multiple epidermal growth factor-like domains protein 8 OS=Homo sapiens OX=9606 GN=MEGF8 PE=1 SV=2
842	Q7Z7M0	228	276	227	277	PF13418.7	Kelch_4	Repeat	2	48	49	33.6	2.9e-08	1	CL0186	sp|Q7Z7M0|MEGF8_HUMAN Multiple epidermal growth factor-like domains protein 8 OS=Homo sapiens OX=9606 GN=MEGF8 PE=1 SV=2
843	Q7Z7M0	1005	1056	1005	1073	PF01437.26	PSI	Family	1	49	51	31.3	2.3e-07	1	CL0630	sp|Q7Z7M0|MEGF8_HUMAN Multiple epidermal growth factor-like domains protein 8 OS=Homo sapiens OX=9606 GN=MEGF8 PE=1 SV=2
844	Q7Z7M0	1078	1111	1078	1114	PF12947.8	EGF_3	Domain	1	34	36	35.4	8.9e-09	1	CL0001	sp|Q7Z7M0|MEGF8_HUMAN Multiple epidermal growth factor-like domains protein 8 OS=Homo sapiens OX=9606 GN=MEGF8 PE=1 SV=2
845	Q7Z7M0	1163	1208	1163	1208	PF00053.25	Laminin_EGF	Domain	1	49	49	14.4	0.032	1	CL0001	sp|Q7Z7M0|MEGF8_HUMAN Multiple epidermal growth factor-like domains protein 8 OS=Homo sapiens OX=9606 GN=MEGF8 PE=1 SV=2
846	Q7Z7M0	1211	1259	1211	1262	PF00053.25	Laminin_EGF	Domain	1	49	49	35.6	7.9e-09	1	CL0001	sp|Q7Z7M0|MEGF8_HUMAN Multiple epidermal growth factor-like domains protein 8 OS=Homo sapiens OX=9606 GN=MEGF8 PE=1 SV=2
847	Q7Z7M0	1509	1562	1509	1564	PF13418.7	Kelch_4	Repeat	1	47	49	38.8	7e-10	1	CL0186	sp|Q7Z7M0|MEGF8_HUMAN Multiple epidermal growth factor-like domains protein 8 OS=Homo sapiens OX=9606 GN=MEGF8 PE=1 SV=2
848	Q7Z7M0	2180	2214	2179	2232	PF07645.16	EGF_CA	Domain	3	37	42	16.4	0.0081	1	CL0001	sp|Q7Z7M0|MEGF8_HUMAN Multiple epidermal growth factor-like domains protein 8 OS=Homo sapiens OX=9606 GN=MEGF8 PE=1 SV=2
849	Q7Z7M0	2348	2373	2335	2378	PF00053.25	Laminin_EGF	Domain	17	41	49	15.8	0.011	1	CL0001	sp|Q7Z7M0|MEGF8_HUMAN Multiple epidermal growth factor-like domains protein 8 OS=Homo sapiens OX=9606 GN=MEGF8 PE=1 SV=2
850	O75445	145	285	130	286	PF13385.7	Laminin_G_3	Domain	16	151	152	55	9.9e-15	1	CL0004	sp|O75445|USH2A_HUMAN Usherin OS=Homo sapiens OX=9606 GN=USH2A PE=1 SV=3
851	O75445	315	516	290	516	PF00055.18	Laminin_N	Family	25	233	233	102.2	3.3e-29	1	CL0202	sp|O75445|USH2A_HUMAN Usherin OS=Homo sapiens OX=9606 GN=USH2A PE=1 SV=3
852	O75445	518	560	518	566	PF00053.25	Laminin_EGF	Domain	1	42	49	16.7	0.0062	1	CL0001	sp|O75445|USH2A_HUMAN Usherin OS=Homo sapiens OX=9606 GN=USH2A PE=1 SV=3
853	O75445	575	627	575	634	PF00053.25	Laminin_EGF	Domain	1	41	49	27.8	2.1e-06	1	CL0001	sp|O75445|USH2A_HUMAN Usherin OS=Homo sapiens OX=9606 GN=USH2A PE=1 SV=3
854	O75445	641	691	641	691	PF00053.25	Laminin_EGF	Domain	1	49	49	37.1	2.6e-09	1	CL0001	sp|O75445|USH2A_HUMAN Usherin OS=Homo sapiens OX=9606 GN=USH2A PE=1 SV=3
855	O75445	694	744	694	744	PF00053.25	Laminin_EGF	Domain	1	49	49	31	2.2e-07	1	CL0001	sp|O75445|USH2A_HUMAN Usherin OS=Homo sapiens OX=9606 GN=USH2A PE=1 SV=3
856	O75445	747	789	747	794	PF00053.25	Laminin_EGF	Domain	1	43	49	35.9	6.1e-09	1	CL0001	sp|O75445|USH2A_HUMAN Usherin OS=Homo sapiens OX=9606 GN=USH2A PE=1 SV=3
857	O75445	795	841	795	844	PF00053.25	Laminin_EGF	Domain	1	46	49	35	1.2e-08	1	CL0001	sp|O75445|USH2A_HUMAN Usherin OS=Homo sapiens OX=9606 GN=USH2A PE=1 SV=3
858	O75445	847	897	847	897	PF00053.25	Laminin_EGF	Domain	1	49	49	31.7	1.2e-07	1	CL0001	sp|O75445|USH2A_HUMAN Usherin OS=Homo sapiens OX=9606 GN=USH2A PE=1 SV=3
859	O75445	900	948	900	948	PF00053.25	Laminin_EGF	Domain	1	49	49	37.3	2.3e-09	1	CL0001	sp|O75445|USH2A_HUMAN Usherin OS=Homo sapiens OX=9606 GN=USH2A PE=1 SV=3
860	O75445	951	997	951	999	PF00053.25	Laminin_EGF	Domain	1	46	49	30.1	3.9e-07	1	CL0001	sp|O75445|USH2A_HUMAN Usherin OS=Homo sapiens OX=9606 GN=USH2A PE=1 SV=3
861	O75445	1002	1042	1002	1050	PF00053.25	Laminin_EGF	Domain	1	41	49	31.5	1.5e-07	1	CL0001	sp|O75445|USH2A_HUMAN Usherin OS=Homo sapiens OX=9606 GN=USH2A PE=1 SV=3
862	O75445	1156	1228	1147	1231	PF00041.22	fn3	Domain	10	81	85	41.7	1.1e-10	1	CL0159	sp|O75445|USH2A_HUMAN Usherin OS=Homo sapiens OX=9606 GN=USH2A PE=1 SV=3
863	O75445	1248	1346	1243	1351	PF00041.22	fn3	Domain	5	80	85	45.8	5.7e-12	1	CL0159	sp|O75445|USH2A_HUMAN Usherin OS=Homo sapiens OX=9606 GN=USH2A PE=1 SV=3
864	O75445	1372	1451	1367	1456	PF00041.22	fn3	Domain	10	80	85	33.6	3.8e-08	1	CL0159	sp|O75445|USH2A_HUMAN Usherin OS=Homo sapiens OX=9606 GN=USH2A PE=1 SV=3
865	O75445	1548	1678	1548	1681	PF02210.25	Laminin_G_2	Domain	1	123	126	70.2	2.4e-19	1	CL0004	sp|O75445|USH2A_HUMAN Usherin OS=Homo sapiens OX=9606 GN=USH2A PE=1 SV=3
866	O75445	1744	1868	1744	1871	PF02210.25	Laminin_G_2	Domain	1	123	126	59.8	4e-16	1	CL0004	sp|O75445|USH2A_HUMAN Usherin OS=Homo sapiens OX=9606 GN=USH2A PE=1 SV=3
867	O75445	1958	2043	1956	2044	PF00041.22	fn3	Domain	3	84	85	27.2	3.6e-06	1	CL0159	sp|O75445|USH2A_HUMAN Usherin OS=Homo sapiens OX=9606 GN=USH2A PE=1 SV=3
868	O75445	2441	2519	2437	2522	PF00041.22	fn3	Domain	6	82	85	31.4	1.9e-07	1	CL0159	sp|O75445|USH2A_HUMAN Usherin OS=Homo sapiens OX=9606 GN=USH2A PE=1 SV=3
869	O75445	2542	2609	2534	2614	PF00041.22	fn3	Domain	9	82	85	31.8	1.4e-07	1	CL0159	sp|O75445|USH2A_HUMAN Usherin OS=Homo sapiens OX=9606 GN=USH2A PE=1 SV=3
870	O75445	2634	2704	2628	2712	PF00041.22	fn3	Domain	9	77	85	27.1	4.1e-06	1	CL0159	sp|O75445|USH2A_HUMAN Usherin OS=Homo sapiens OX=9606 GN=USH2A PE=1 SV=3
871	O75445	2729	2799	2725	2803	PF00041.22	fn3	Domain	5	79	85	28.8	1.2e-06	1	CL0159	sp|O75445|USH2A_HUMAN Usherin OS=Homo sapiens OX=9606 GN=USH2A PE=1 SV=3
872	O75445	2930	3003	2927	3006	PF00041.22	fn3	Domain	5	79	85	28	2.1e-06	1	CL0159	sp|O75445|USH2A_HUMAN Usherin OS=Homo sapiens OX=9606 GN=USH2A PE=1 SV=3
873	O75445	3596	3666	3592	3670	PF00041.22	fn3	Domain	6	81	85	37.8	1.8e-09	1	CL0159	sp|O75445|USH2A_HUMAN Usherin OS=Homo sapiens OX=9606 GN=USH2A PE=1 SV=3
874	O75445	3781	3856	3776	3856	PF00041.22	fn3	Domain	8	85	85	25	1.8e-05	1	CL0159	sp|O75445|USH2A_HUMAN Usherin OS=Homo sapiens OX=9606 GN=USH2A PE=1 SV=3
875	O75445	3974	4050	3969	4057	PF00041.22	fn3	Domain	9	80	85	43	4.3e-11	1	CL0159	sp|O75445|USH2A_HUMAN Usherin OS=Homo sapiens OX=9606 GN=USH2A PE=1 SV=3
876	O75445	4161	4247	4159	4253	PF00041.22	fn3	Domain	6	80	85	25.1	1.8e-05	1	CL0159	sp|O75445|USH2A_HUMAN Usherin OS=Homo sapiens OX=9606 GN=USH2A PE=1 SV=3
877	O75445	4359	4429	4357	4432	PF00041.22	fn3	Domain	3	81	85	28.1	1.9e-06	1	CL0159	sp|O75445|USH2A_HUMAN Usherin OS=Homo sapiens OX=9606 GN=USH2A PE=1 SV=3
878	O75445	4538	4616	4533	4621	PF00041.22	fn3	Domain	6	80	85	31.2	2.1e-07	1	CL0159	sp|O75445|USH2A_HUMAN Usherin OS=Homo sapiens OX=9606 GN=USH2A PE=1 SV=3
879	O75445	4840	4916	4827	4921	PF00041.22	fn3	Domain	11	80	85	25.7	1.1e-05	1	CL0159	sp|O75445|USH2A_HUMAN Usherin OS=Homo sapiens OX=9606 GN=USH2A PE=1 SV=3
880	P98160	198	234	197	234	PF00057.19	Ldl_recept_a	Repeat	2	37	37	38.1	1.3e-09	1	No_clan	sp|P98160|PGBM_HUMAN Basement membrane-specific heparan sulfate proteoglycan core protein OS=Homo sapiens OX=9606 GN=HSPG2 PE=1 SV=4
881	P98160	284	319	283	319	PF00057.19	Ldl_recept_a	Repeat	2	37	37	45.1	8.4e-12	1	No_clan	sp|P98160|PGBM_HUMAN Basement membrane-specific heparan sulfate proteoglycan core protein OS=Homo sapiens OX=9606 GN=HSPG2 PE=1 SV=4
882	P98160	324	359	323	359	PF00057.19	Ldl_recept_a	Repeat	2	37	37	39.1	6.3e-10	1	No_clan	sp|P98160|PGBM_HUMAN Basement membrane-specific heparan sulfate proteoglycan core protein OS=Homo sapiens OX=9606 GN=HSPG2 PE=1 SV=4
883	P98160	368	403	366	403	PF00057.19	Ldl_recept_a	Repeat	3	37	37	36.8	3.3e-09	1	No_clan	sp|P98160|PGBM_HUMAN Basement membrane-specific heparan sulfate proteoglycan core protein OS=Homo sapiens OX=9606 GN=HSPG2 PE=1 SV=4
884	P98160	405	483	405	483	PF13927.7	Ig_3	Domain	1	79	79	59.8	3e-16	1	CL0011	sp|P98160|PGBM_HUMAN Basement membrane-specific heparan sulfate proteoglycan core protein OS=Homo sapiens OX=9606 GN=HSPG2 PE=1 SV=4
885	P98160	595	729	595	729	PF00052.19	Laminin_B	Family	1	135	135	114.4	3.3e-33	1	CL0202	sp|P98160|PGBM_HUMAN Basement membrane-specific heparan sulfate proteoglycan core protein OS=Homo sapiens OX=9606 GN=HSPG2 PE=1 SV=4
886	P98160	764	806	764	811	PF00053.25	Laminin_EGF	Domain	1	44	49	35	1.1e-08	1	CL0001	sp|P98160|PGBM_HUMAN Basement membrane-specific heparan sulfate proteoglycan core protein OS=Homo sapiens OX=9606 GN=HSPG2 PE=1 SV=4
887	P98160	814	869	814	869	PF00053.25	Laminin_EGF	Domain	1	49	49	25	1.5e-05	1	CL0001	sp|P98160|PGBM_HUMAN Basement membrane-specific heparan sulfate proteoglycan core protein OS=Homo sapiens OX=9606 GN=HSPG2 PE=1 SV=4
888	P98160	990	1124	990	1124	PF00052.19	Laminin_B	Family	1	135	135	142.9	5.4e-42	1	CL0202	sp|P98160|PGBM_HUMAN Basement membrane-specific heparan sulfate proteoglycan core protein OS=Homo sapiens OX=9606 GN=HSPG2 PE=1 SV=4
889	P98160	1125	1149	1116	1156	PF00053.25	Laminin_EGF	Domain	19	43	49	16	0.01	1	CL0001	sp|P98160|PGBM_HUMAN Basement membrane-specific heparan sulfate proteoglycan core protein OS=Homo sapiens OX=9606 GN=HSPG2 PE=1 SV=4
890	P98160	1159	1206	1159	1206	PF00053.25	Laminin_EGF	Domain	1	49	49	36.2	5e-09	1	CL0001	sp|P98160|PGBM_HUMAN Basement membrane-specific heparan sulfate proteoglycan core protein OS=Homo sapiens OX=9606 GN=HSPG2 PE=1 SV=4
891	P98160	1209	1263	1209	1264	PF00053.25	Laminin_EGF	Domain	1	49	49	19.8	0.00064	1	CL0001	sp|P98160|PGBM_HUMAN Basement membrane-specific heparan sulfate proteoglycan core protein OS=Homo sapiens OX=9606 GN=HSPG2 PE=1 SV=4
892	P98160	1275	1322	1275	1322	PF00053.25	Laminin_EGF	Domain	1	49	49	33.7	3.1e-08	1	CL0001	sp|P98160|PGBM_HUMAN Basement membrane-specific heparan sulfate proteoglycan core protein OS=Homo sapiens OX=9606 GN=HSPG2 PE=1 SV=4
893	P98160	1396	1528	1396	1528	PF00052.19	Laminin_B	Family	1	135	135	121.2	2.7e-35	1	CL0202	sp|P98160|PGBM_HUMAN Basement membrane-specific heparan sulfate proteoglycan core protein OS=Homo sapiens OX=9606 GN=HSPG2 PE=1 SV=4
894	P98160	1529	1551	1523	1556	PF00053.25	Laminin_EGF	Domain	19	41	49	16	0.01	1	CL0001	sp|P98160|PGBM_HUMAN Basement membrane-specific heparan sulfate proteoglycan core protein OS=Homo sapiens OX=9606 GN=HSPG2 PE=1 SV=4
895	P98160	1563	1610	1563	1610	PF00053.25	Laminin_EGF	Domain	1	49	49	33.2	4.3e-08	1	CL0001	sp|P98160|PGBM_HUMAN Basement membrane-specific heparan sulfate proteoglycan core protein OS=Homo sapiens OX=9606 GN=HSPG2 PE=1 SV=4
896	P98160	1613	1668	1613	1668	PF00053.25	Laminin_EGF	Domain	1	49	49	22.9	7.1e-05	1	CL0001	sp|P98160|PGBM_HUMAN Basement membrane-specific heparan sulfate proteoglycan core protein OS=Homo sapiens OX=9606 GN=HSPG2 PE=1 SV=4
897	P98160	1678	1750	1676	1750	PF13927.7	Ig_3	Domain	3	79	79	46.3	4.8e-12	1	CL0011	sp|P98160|PGBM_HUMAN Basement membrane-specific heparan sulfate proteoglycan core protein OS=Homo sapiens OX=9606 GN=HSPG2 PE=1 SV=4
898	P98160	1774	1844	1769	1844	PF13927.7	Ig_3	Domain	5	79	79	42.3	8.3e-11	1	CL0011	sp|P98160|PGBM_HUMAN Basement membrane-specific heparan sulfate proteoglycan core protein OS=Homo sapiens OX=9606 GN=HSPG2 PE=1 SV=4
899	P98160	1866	1950	1866	1950	PF07679.17	I-set	Domain	1	90	90	39	6.4e-10	1	CL0011	sp|P98160|PGBM_HUMAN Basement membrane-specific heparan sulfate proteoglycan core protein OS=Homo sapiens OX=9606 GN=HSPG2 PE=1 SV=4
900	P98160	1956	2042	1956	2042	PF07679.17	I-set	Domain	1	90	90	50.1	2.2e-13	1	CL0011	sp|P98160|PGBM_HUMAN Basement membrane-specific heparan sulfate proteoglycan core protein OS=Homo sapiens OX=9606 GN=HSPG2 PE=1 SV=4
901	P98160	2050	2121	2050	2121	PF13927.7	Ig_3	Domain	1	79	79	50.5	2.4e-13	1	CL0011	sp|P98160|PGBM_HUMAN Basement membrane-specific heparan sulfate proteoglycan core protein OS=Homo sapiens OX=9606 GN=HSPG2 PE=1 SV=4
902	P98160	2154	2220	2153	2221	PF13927.7	Ig_3	Domain	4	77	79	43.3	4e-11	1	CL0011	sp|P98160|PGBM_HUMAN Basement membrane-specific heparan sulfate proteoglycan core protein OS=Homo sapiens OX=9606 GN=HSPG2 PE=1 SV=4
903	P98160	2245	2315	2245	2315	PF13927.7	Ig_3	Domain	2	79	79	51.3	1.3e-13	1	CL0011	sp|P98160|PGBM_HUMAN Basement membrane-specific heparan sulfate proteoglycan core protein OS=Homo sapiens OX=9606 GN=HSPG2 PE=1 SV=4
904	P98160	2343	2409	2342	2410	PF13927.7	Ig_3	Domain	4	77	79	41.8	1.2e-10	1	CL0011	sp|P98160|PGBM_HUMAN Basement membrane-specific heparan sulfate proteoglycan core protein OS=Homo sapiens OX=9606 GN=HSPG2 PE=1 SV=4
905	P98160	2437	2520	2437	2520	PF07679.17	I-set	Domain	1	90	90	47.5	1.4e-12	1	CL0011	sp|P98160|PGBM_HUMAN Basement membrane-specific heparan sulfate proteoglycan core protein OS=Homo sapiens OX=9606 GN=HSPG2 PE=1 SV=4
906	P98160	2538	2604	2535	2604	PF13927.7	Ig_3	Domain	6	79	79	47.2	2.6e-12	1	CL0011	sp|P98160|PGBM_HUMAN Basement membrane-specific heparan sulfate proteoglycan core protein OS=Homo sapiens OX=9606 GN=HSPG2 PE=1 SV=4
907	P98160	2630	2700	2629	2700	PF13927.7	Ig_3	Domain	2	79	79	48.9	7.5e-13	1	CL0011	sp|P98160|PGBM_HUMAN Basement membrane-specific heparan sulfate proteoglycan core protein OS=Homo sapiens OX=9606 GN=HSPG2 PE=1 SV=4
908	P98160	2729	2795	2728	2796	PF13927.7	Ig_3	Domain	4	77	79	43.1	4.9e-11	1	CL0011	sp|P98160|PGBM_HUMAN Basement membrane-specific heparan sulfate proteoglycan core protein OS=Homo sapiens OX=9606 GN=HSPG2 PE=1 SV=4
909	P98160	2827	2910	2827	2910	PF07679.17	I-set	Domain	1	90	90	46.1	3.8e-12	1	CL0011	sp|P98160|PGBM_HUMAN Basement membrane-specific heparan sulfate proteoglycan core protein OS=Homo sapiens OX=9606 GN=HSPG2 PE=1 SV=4
910	P98160	2929	3009	2926	3009	PF13895.7	Ig_2	Domain	4	79	79	46.1	4.8e-12	1	CL0011	sp|P98160|PGBM_HUMAN Basement membrane-specific heparan sulfate proteoglycan core protein OS=Homo sapiens OX=9606 GN=HSPG2 PE=1 SV=4
911	P98160	3022	3095	3021	3095	PF13927.7	Ig_3	Domain	2	79	79	41.9	1.1e-10	1	CL0011	sp|P98160|PGBM_HUMAN Basement membrane-specific heparan sulfate proteoglycan core protein OS=Homo sapiens OX=9606 GN=HSPG2 PE=1 SV=4
912	P98160	3111	3189	3111	3189	PF13927.7	Ig_3	Domain	1	79	79	44.3	2.1e-11	1	CL0011	sp|P98160|PGBM_HUMAN Basement membrane-specific heparan sulfate proteoglycan core protein OS=Homo sapiens OX=9606 GN=HSPG2 PE=1 SV=4
913	P98160	3212	3295	3212	3295	PF07679.17	I-set	Domain	1	90	90	49.2	4.3e-13	1	CL0011	sp|P98160|PGBM_HUMAN Basement membrane-specific heparan sulfate proteoglycan core protein OS=Homo sapiens OX=9606 GN=HSPG2 PE=1 SV=4
914	P98160	3299	3382	3299	3382	PF07679.17	I-set	Domain	1	90	90	49.6	3.2e-13	1	CL0011	sp|P98160|PGBM_HUMAN Basement membrane-specific heparan sulfate proteoglycan core protein OS=Homo sapiens OX=9606 GN=HSPG2 PE=1 SV=4
915	P98160	3402	3483	3400	3483	PF07679.17	I-set	Domain	3	90	90	32.2	8.4e-08	1	CL0011	sp|P98160|PGBM_HUMAN Basement membrane-specific heparan sulfate proteoglycan core protein OS=Homo sapiens OX=9606 GN=HSPG2 PE=1 SV=4
916	P98160	3494	3572	3489	3572	PF07679.17	I-set	Domain	6	90	90	46.2	3.6e-12	1	CL0011	sp|P98160|PGBM_HUMAN Basement membrane-specific heparan sulfate proteoglycan core protein OS=Homo sapiens OX=9606 GN=HSPG2 PE=1 SV=4
917	P98160	3580	3658	3576	3658	PF07679.17	I-set	Domain	6	90	90	48.3	7.8e-13	1	CL0011	sp|P98160|PGBM_HUMAN Basement membrane-specific heparan sulfate proteoglycan core protein OS=Homo sapiens OX=9606 GN=HSPG2 PE=1 SV=4
918	P98160	3692	3829	3692	3831	PF00054.24	Laminin_G_1	Domain	1	129	131	78.2	6.5e-22	1	CL0004	sp|P98160|PGBM_HUMAN Basement membrane-specific heparan sulfate proteoglycan core protein OS=Homo sapiens OX=9606 GN=HSPG2 PE=1 SV=4
919	P98160	3848	3879	3848	3879	PF00008.28	EGF	Domain	1	32	32	28.1	1.9e-06	1	CL0001	sp|P98160|PGBM_HUMAN Basement membrane-specific heparan sulfate proteoglycan core protein OS=Homo sapiens OX=9606 GN=HSPG2 PE=1 SV=4
920	P98160	3960	4088	3957	4088	PF00054.24	Laminin_G_1	Domain	4	131	131	98.8	2.8e-28	1	CL0004	sp|P98160|PGBM_HUMAN Basement membrane-specific heparan sulfate proteoglycan core protein OS=Homo sapiens OX=9606 GN=HSPG2 PE=1 SV=4
921	P98160	4108	4138	4108	4139	PF00008.28	EGF	Domain	1	31	32	24	3.6e-05	1	CL0001	sp|P98160|PGBM_HUMAN Basement membrane-specific heparan sulfate proteoglycan core protein OS=Homo sapiens OX=9606 GN=HSPG2 PE=1 SV=4
922	P98160	4234	4362	4234	4365	PF00054.24	Laminin_G_1	Domain	1	126	131	98.4	3.7e-28	1	CL0004	sp|P98160|PGBM_HUMAN Basement membrane-specific heparan sulfate proteoglycan core protein OS=Homo sapiens OX=9606 GN=HSPG2 PE=1 SV=4
923	Q96RW7	521	608	520	608	PF07679.17	I-set	Domain	2	90	90	41.3	1.3e-10	1	CL0011	sp|Q96RW7|HMCN1_HUMAN Hemicentin-1 OS=Homo sapiens OX=9606 GN=HMCN1 PE=1 SV=2
924	Q96RW7	612	696	612	697	PF07679.17	I-set	Domain	1	88	90	56.5	2.2e-15	1	CL0011	sp|Q96RW7|HMCN1_HUMAN Hemicentin-1 OS=Homo sapiens OX=9606 GN=HMCN1 PE=1 SV=2
925	Q96RW7	709	789	702	789	PF07679.17	I-set	Domain	8	90	90	45.1	7.9e-12	1	CL0011	sp|Q96RW7|HMCN1_HUMAN Hemicentin-1 OS=Homo sapiens OX=9606 GN=HMCN1 PE=1 SV=2
926	Q96RW7	793	884	793	884	PF07679.17	I-set	Domain	1	90	90	55.1	6.2e-15	1	CL0011	sp|Q96RW7|HMCN1_HUMAN Hemicentin-1 OS=Homo sapiens OX=9606 GN=HMCN1 PE=1 SV=2
927	Q96RW7	890	964	889	964	PF13927.7	Ig_3	Domain	2	79	79	46.8	3.3e-12	1	CL0011	sp|Q96RW7|HMCN1_HUMAN Hemicentin-1 OS=Homo sapiens OX=9606 GN=HMCN1 PE=1 SV=2
928	Q96RW7	988	1055	981	1055	PF13927.7	Ig_3	Domain	9	79	79	44.5	1.7e-11	1	CL0011	sp|Q96RW7|HMCN1_HUMAN Hemicentin-1 OS=Homo sapiens OX=9606 GN=HMCN1 PE=1 SV=2
929	Q96RW7	1085	1167	1082	1167	PF07679.17	I-set	Domain	6	90	90	47.4	1.5e-12	1	CL0011	sp|Q96RW7|HMCN1_HUMAN Hemicentin-1 OS=Homo sapiens OX=9606 GN=HMCN1 PE=1 SV=2
930	Q96RW7	1171	1258	1171	1258	PF07679.17	I-set	Domain	1	90	90	72.5	2.3e-20	1	CL0011	sp|Q96RW7|HMCN1_HUMAN Hemicentin-1 OS=Homo sapiens OX=9606 GN=HMCN1 PE=1 SV=2
931	Q96RW7	1280	1355	1272	1355	PF07679.17	I-set	Domain	14	90	90	48.3	8e-13	1	CL0011	sp|Q96RW7|HMCN1_HUMAN Hemicentin-1 OS=Homo sapiens OX=9606 GN=HMCN1 PE=1 SV=2
932	Q96RW7	1366	1447	1360	1448	PF07679.17	I-set	Domain	6	89	90	48.7	5.8e-13	1	CL0011	sp|Q96RW7|HMCN1_HUMAN Hemicentin-1 OS=Homo sapiens OX=9606 GN=HMCN1 PE=1 SV=2
933	Q96RW7	1459	1542	1456	1542	PF07679.17	I-set	Domain	6	90	90	56.3	2.6e-15	1	CL0011	sp|Q96RW7|HMCN1_HUMAN Hemicentin-1 OS=Homo sapiens OX=9606 GN=HMCN1 PE=1 SV=2
934	Q96RW7	1555	1635	1551	1635	PF07679.17	I-set	Domain	8	90	90	51.7	7e-14	1	CL0011	sp|Q96RW7|HMCN1_HUMAN Hemicentin-1 OS=Homo sapiens OX=9606 GN=HMCN1 PE=1 SV=2
935	Q96RW7	1651	1729	1645	1729	PF07679.17	I-set	Domain	10	90	90	47.3	1.7e-12	1	CL0011	sp|Q96RW7|HMCN1_HUMAN Hemicentin-1 OS=Homo sapiens OX=9606 GN=HMCN1 PE=1 SV=2
936	Q96RW7	1746	1822	1740	1822	PF07679.17	I-set	Domain	12	90	90	54.1	1.2e-14	1	CL0011	sp|Q96RW7|HMCN1_HUMAN Hemicentin-1 OS=Homo sapiens OX=9606 GN=HMCN1 PE=1 SV=2
937	Q96RW7	1838	1915	1829	1915	PF07679.17	I-set	Domain	12	90	90	52.6	3.8e-14	1	CL0011	sp|Q96RW7|HMCN1_HUMAN Hemicentin-1 OS=Homo sapiens OX=9606 GN=HMCN1 PE=1 SV=2
938	Q96RW7	1931	2008	1925	2008	PF07679.17	I-set	Domain	11	90	90	47.6	1.3e-12	1	CL0011	sp|Q96RW7|HMCN1_HUMAN Hemicentin-1 OS=Homo sapiens OX=9606 GN=HMCN1 PE=1 SV=2
939	Q96RW7	2012	2100	2012	2100	PF07679.17	I-set	Domain	1	90	90	51.5	8.2e-14	1	CL0011	sp|Q96RW7|HMCN1_HUMAN Hemicentin-1 OS=Homo sapiens OX=9606 GN=HMCN1 PE=1 SV=2
940	Q96RW7	2103	2178	2103	2178	PF13927.7	Ig_3	Domain	1	79	79	54.2	1.6e-14	1	CL0011	sp|Q96RW7|HMCN1_HUMAN Hemicentin-1 OS=Homo sapiens OX=9606 GN=HMCN1 PE=1 SV=2
941	Q96RW7	2202	2286	2200	2286	PF07679.17	I-set	Domain	6	90	90	45.5	6.1e-12	1	CL0011	sp|Q96RW7|HMCN1_HUMAN Hemicentin-1 OS=Homo sapiens OX=9606 GN=HMCN1 PE=1 SV=2
942	Q96RW7	2298	2380	2295	2380	PF07679.17	I-set	Domain	6	90	90	57.5	1.1e-15	1	CL0011	sp|Q96RW7|HMCN1_HUMAN Hemicentin-1 OS=Homo sapiens OX=9606 GN=HMCN1 PE=1 SV=2
943	Q96RW7	2392	2474	2389	2474	PF07679.17	I-set	Domain	6	90	90	53.8	1.5e-14	1	CL0011	sp|Q96RW7|HMCN1_HUMAN Hemicentin-1 OS=Homo sapiens OX=9606 GN=HMCN1 PE=1 SV=2
944	Q96RW7	2484	2567	2480	2567	PF07679.17	I-set	Domain	5	90	90	64.3	8e-18	1	CL0011	sp|Q96RW7|HMCN1_HUMAN Hemicentin-1 OS=Homo sapiens OX=9606 GN=HMCN1 PE=1 SV=2
945	Q96RW7	2581	2663	2579	2663	PF07679.17	I-set	Domain	6	90	90	51.3	9.5e-14	1	CL0011	sp|Q96RW7|HMCN1_HUMAN Hemicentin-1 OS=Homo sapiens OX=9606 GN=HMCN1 PE=1 SV=2
946	Q96RW7	2681	2762	2679	2762	PF07679.17	I-set	Domain	7	90	90	67.8	6.7e-19	1	CL0011	sp|Q96RW7|HMCN1_HUMAN Hemicentin-1 OS=Homo sapiens OX=9606 GN=HMCN1 PE=1 SV=2
947	Q96RW7	2790	2864	2784	2865	PF07679.17	I-set	Domain	13	89	90	47.4	1.5e-12	1	CL0011	sp|Q96RW7|HMCN1_HUMAN Hemicentin-1 OS=Homo sapiens OX=9606 GN=HMCN1 PE=1 SV=2
948	Q96RW7	2879	2960	2875	2960	PF07679.17	I-set	Domain	7	90	90	49.7	3e-13	1	CL0011	sp|Q96RW7|HMCN1_HUMAN Hemicentin-1 OS=Homo sapiens OX=9606 GN=HMCN1 PE=1 SV=2
949	Q96RW7	2969	3052	2965	3052	PF07679.17	I-set	Domain	5	90	90	57.5	1e-15	1	CL0011	sp|Q96RW7|HMCN1_HUMAN Hemicentin-1 OS=Homo sapiens OX=9606 GN=HMCN1 PE=1 SV=2
950	Q96RW7	3065	3147	3062	3147	PF07679.17	I-set	Domain	6	90	90	61.9	4.6e-17	1	CL0011	sp|Q96RW7|HMCN1_HUMAN Hemicentin-1 OS=Homo sapiens OX=9606 GN=HMCN1 PE=1 SV=2
951	Q96RW7	3150	3228	3150	3228	PF13927.7	Ig_3	Domain	1	79	79	59.4	3.9e-16	1	CL0011	sp|Q96RW7|HMCN1_HUMAN Hemicentin-1 OS=Homo sapiens OX=9606 GN=HMCN1 PE=1 SV=2
952	Q96RW7	3252	3336	3249	3336	PF07679.17	I-set	Domain	6	90	90	66.8	1.3e-18	1	CL0011	sp|Q96RW7|HMCN1_HUMAN Hemicentin-1 OS=Homo sapiens OX=9606 GN=HMCN1 PE=1 SV=2
953	Q96RW7	3353	3430	3346	3430	PF07679.17	I-set	Domain	11	90	90	50.6	1.5e-13	1	CL0011	sp|Q96RW7|HMCN1_HUMAN Hemicentin-1 OS=Homo sapiens OX=9606 GN=HMCN1 PE=1 SV=2
954	Q96RW7	3443	3523	3437	3523	PF07679.17	I-set	Domain	8	90	90	54.9	7e-15	1	CL0011	sp|Q96RW7|HMCN1_HUMAN Hemicentin-1 OS=Homo sapiens OX=9606 GN=HMCN1 PE=1 SV=2
955	Q96RW7	3526	3602	3526	3603	PF13927.7	Ig_3	Domain	1	78	79	49.5	4.7e-13	1	CL0011	sp|Q96RW7|HMCN1_HUMAN Hemicentin-1 OS=Homo sapiens OX=9606 GN=HMCN1 PE=1 SV=2
956	Q96RW7	3626	3709	3623	3709	PF07679.17	I-set	Domain	5	90	90	51.4	8.4e-14	1	CL0011	sp|Q96RW7|HMCN1_HUMAN Hemicentin-1 OS=Homo sapiens OX=9606 GN=HMCN1 PE=1 SV=2
957	Q96RW7	3713	3800	3713	3800	PF07679.17	I-set	Domain	1	90	90	52.6	3.6e-14	1	CL0011	sp|Q96RW7|HMCN1_HUMAN Hemicentin-1 OS=Homo sapiens OX=9606 GN=HMCN1 PE=1 SV=2
958	Q96RW7	3805	3893	3804	3893	PF07679.17	I-set	Domain	2	90	90	49.1	4.6e-13	1	CL0011	sp|Q96RW7|HMCN1_HUMAN Hemicentin-1 OS=Homo sapiens OX=9606 GN=HMCN1 PE=1 SV=2
959	Q96RW7	3896	3971	3896	3971	PF13927.7	Ig_3	Domain	1	79	79	41.4	1.7e-10	1	CL0011	sp|Q96RW7|HMCN1_HUMAN Hemicentin-1 OS=Homo sapiens OX=9606 GN=HMCN1 PE=1 SV=2
960	Q96RW7	3987	4062	3987	4062	PF13927.7	Ig_3	Domain	1	79	79	52.8	4.5e-14	1	CL0011	sp|Q96RW7|HMCN1_HUMAN Hemicentin-1 OS=Homo sapiens OX=9606 GN=HMCN1 PE=1 SV=2
961	Q96RW7	4079	4165	4079	4165	PF07679.17	I-set	Domain	1	90	90	55.8	3.8e-15	1	CL0011	sp|Q96RW7|HMCN1_HUMAN Hemicentin-1 OS=Homo sapiens OX=9606 GN=HMCN1 PE=1 SV=2
962	Q96RW7	4168	4243	4168	4243	PF13927.7	Ig_3	Domain	1	79	79	47.3	2.3e-12	1	CL0011	sp|Q96RW7|HMCN1_HUMAN Hemicentin-1 OS=Homo sapiens OX=9606 GN=HMCN1 PE=1 SV=2
963	Q96RW7	4260	4332	4260	4332	PF13927.7	Ig_3	Domain	2	79	79	54.9	1e-14	1	CL0011	sp|Q96RW7|HMCN1_HUMAN Hemicentin-1 OS=Homo sapiens OX=9606 GN=HMCN1 PE=1 SV=2
964	Q96RW7	4364	4435	4354	4436	PF07679.17	I-set	Domain	15	89	90	51.6	7.4e-14	1	CL0011	sp|Q96RW7|HMCN1_HUMAN Hemicentin-1 OS=Homo sapiens OX=9606 GN=HMCN1 PE=1 SV=2
965	Q96RW7	4439	4513	4439	4513	PF13927.7	Ig_3	Domain	1	79	79	53.3	3.2e-14	1	CL0011	sp|Q96RW7|HMCN1_HUMAN Hemicentin-1 OS=Homo sapiens OX=9606 GN=HMCN1 PE=1 SV=2
966	Q96RW7	4533	4583	4533	4583	PF00090.20	TSP_1	Domain	1	49	49	51.8	7e-14	1	CL0692	sp|Q96RW7|HMCN1_HUMAN Hemicentin-1 OS=Homo sapiens OX=9606 GN=HMCN1 PE=1 SV=2
967	Q96RW7	4590	4640	4590	4640	PF00090.20	TSP_1	Domain	1	49	49	47.5	1.6e-12	1	CL0692	sp|Q96RW7|HMCN1_HUMAN Hemicentin-1 OS=Homo sapiens OX=9606 GN=HMCN1 PE=1 SV=2
968	Q96RW7	4647	4697	4647	4697	PF00090.20	TSP_1	Domain	1	49	49	42.2	7e-11	1	CL0692	sp|Q96RW7|HMCN1_HUMAN Hemicentin-1 OS=Homo sapiens OX=9606 GN=HMCN1 PE=1 SV=2
969	Q96RW7	4705	4754	4704	4754	PF00090.20	TSP_1	Domain	2	49	49	39.8	3.7e-10	1	CL0692	sp|Q96RW7|HMCN1_HUMAN Hemicentin-1 OS=Homo sapiens OX=9606 GN=HMCN1 PE=1 SV=2
970	Q96RW7	4761	4811	4761	4811	PF00090.20	TSP_1	Domain	1	49	49	36.4	4.6e-09	1	CL0692	sp|Q96RW7|HMCN1_HUMAN Hemicentin-1 OS=Homo sapiens OX=9606 GN=HMCN1 PE=1 SV=2
971	Q96RW7	4819	4868	4818	4868	PF00090.20	TSP_1	Domain	2	49	49	41	1.7e-10	1	CL0692	sp|Q96RW7|HMCN1_HUMAN Hemicentin-1 OS=Homo sapiens OX=9606 GN=HMCN1 PE=1 SV=2
972	Q96RW7	4870	5050	4870	5052	PF07474.13	G2F	Domain	1	182	184	176.6	4.3e-52	1	CL0069	sp|Q96RW7|HMCN1_HUMAN Hemicentin-1 OS=Homo sapiens OX=9606 GN=HMCN1 PE=1 SV=2
973	Q96RW7	5107	5145	5107	5145	PF07645.16	EGF_CA	Domain	1	42	42	21.3	0.00024	1	CL0001	sp|Q96RW7|HMCN1_HUMAN Hemicentin-1 OS=Homo sapiens OX=9606 GN=HMCN1 PE=1 SV=2
974	Q96RW7	5147	5190	5147	5190	PF07645.16	EGF_CA	Domain	1	42	42	41.2	1.5e-10	1	CL0001	sp|Q96RW7|HMCN1_HUMAN Hemicentin-1 OS=Homo sapiens OX=9606 GN=HMCN1 PE=1 SV=2
975	Q96RW7	5192	5228	5192	5228	PF07645.16	EGF_CA	Domain	1	42	42	27.2	3.3e-06	1	CL0001	sp|Q96RW7|HMCN1_HUMAN Hemicentin-1 OS=Homo sapiens OX=9606 GN=HMCN1 PE=1 SV=2
976	Q96RW7	5230	5270	5230	5270	PF07645.16	EGF_CA	Domain	1	42	42	26.9	4.1e-06	1	CL0001	sp|Q96RW7|HMCN1_HUMAN Hemicentin-1 OS=Homo sapiens OX=9606 GN=HMCN1 PE=1 SV=2
977	Q96RW7	5272	5313	5272	5313	PF07645.16	EGF_CA	Domain	1	42	42	47.2	1.9e-12	1	CL0001	sp|Q96RW7|HMCN1_HUMAN Hemicentin-1 OS=Homo sapiens OX=9606 GN=HMCN1 PE=1 SV=2
978	Q96RW7	5315	5354	5315	5354	PF07645.16	EGF_CA	Domain	1	42	42	29.8	5.1e-07	1	CL0001	sp|Q96RW7|HMCN1_HUMAN Hemicentin-1 OS=Homo sapiens OX=9606 GN=HMCN1 PE=1 SV=2
979	Q96RW7	5452	5475	5452	5475	PF12662.8	cEGF	Domain	1	24	24	41.1	1.3e-10	1	CL0001	sp|Q96RW7|HMCN1_HUMAN Hemicentin-1 OS=Homo sapiens OX=9606 GN=HMCN1 PE=1 SV=2
980	P25391	23	268	22	268	PF00055.18	Laminin_N	Family	2	233	233	224	2e-66	1	CL0202	sp|P25391|LAMA1_HUMAN Laminin subunit alpha-1 OS=Homo sapiens OX=9606 GN=LAMA1 PE=1 SV=2
981	P25391	270	319	270	324	PF00053.25	Laminin_EGF	Domain	1	44	49	15.6	0.013	1	CL0001	sp|P25391|LAMA1_HUMAN Laminin subunit alpha-1 OS=Homo sapiens OX=9606 GN=LAMA1 PE=1 SV=2
982	P25391	327	385	327	394	PF00053.25	Laminin_EGF	Domain	1	43	49	17.5	0.0034	1	CL0001	sp|P25391|LAMA1_HUMAN Laminin subunit alpha-1 OS=Homo sapiens OX=9606 GN=LAMA1 PE=1 SV=2
983	P25391	397	449	397	453	PF00053.25	Laminin_EGF	Domain	1	42	49	33.4	3.7e-08	1	CL0001	sp|P25391|LAMA1_HUMAN Laminin subunit alpha-1 OS=Homo sapiens OX=9606 GN=LAMA1 PE=1 SV=2
984	P25391	454	500	454	500	PF00053.25	Laminin_EGF	Domain	1	49	49	36.1	5.4e-09	1	CL0001	sp|P25391|LAMA1_HUMAN Laminin subunit alpha-1 OS=Homo sapiens OX=9606 GN=LAMA1 PE=1 SV=2
985	P25391	568	707	568	707	PF00052.19	Laminin_B	Family	1	135	135	108.1	3e-31	1	CL0202	sp|P25391|LAMA1_HUMAN Laminin subunit alpha-1 OS=Homo sapiens OX=9606 GN=LAMA1 PE=1 SV=2
986	P25391	708	729	704	733	PF00053.25	Laminin_EGF	Domain	19	40	49	18.2	0.002	1	CL0001	sp|P25391|LAMA1_HUMAN Laminin subunit alpha-1 OS=Homo sapiens OX=9606 GN=LAMA1 PE=1 SV=2
987	P25391	742	788	742	788	PF00053.25	Laminin_EGF	Domain	1	49	49	31.7	1.2e-07	1	CL0001	sp|P25391|LAMA1_HUMAN Laminin subunit alpha-1 OS=Homo sapiens OX=9606 GN=LAMA1 PE=1 SV=2
988	P25391	791	846	791	846	PF00053.25	Laminin_EGF	Domain	1	49	49	32.3	7.9e-08	1	CL0001	sp|P25391|LAMA1_HUMAN Laminin subunit alpha-1 OS=Homo sapiens OX=9606 GN=LAMA1 PE=1 SV=2
989	P25391	849	899	849	899	PF00053.25	Laminin_EGF	Domain	1	49	49	34.8	1.3e-08	1	CL0001	sp|P25391|LAMA1_HUMAN Laminin subunit alpha-1 OS=Homo sapiens OX=9606 GN=LAMA1 PE=1 SV=2
990	P25391	902	948	902	948	PF00053.25	Laminin_EGF	Domain	1	49	49	43.4	2.7e-11	1	CL0001	sp|P25391|LAMA1_HUMAN Laminin subunit alpha-1 OS=Homo sapiens OX=9606 GN=LAMA1 PE=1 SV=2
991	P25391	951	992	951	996	PF00053.25	Laminin_EGF	Domain	1	45	49	32.5	7.1e-08	1	CL0001	sp|P25391|LAMA1_HUMAN Laminin subunit alpha-1 OS=Homo sapiens OX=9606 GN=LAMA1 PE=1 SV=2
992	P25391	998	1041	998	1041	PF00053.25	Laminin_EGF	Domain	1	49	49	30.5	2.9e-07	1	CL0001	sp|P25391|LAMA1_HUMAN Laminin subunit alpha-1 OS=Homo sapiens OX=9606 GN=LAMA1 PE=1 SV=2
993	P25391	1044	1086	1044	1089	PF00053.25	Laminin_EGF	Domain	1	43	49	33.9	2.6e-08	1	CL0001	sp|P25391|LAMA1_HUMAN Laminin subunit alpha-1 OS=Homo sapiens OX=9606 GN=LAMA1 PE=1 SV=2
994	P25391	1090	1147	1090	1147	PF00053.25	Laminin_EGF	Domain	1	49	49	34	2.4e-08	1	CL0001	sp|P25391|LAMA1_HUMAN Laminin subunit alpha-1 OS=Homo sapiens OX=9606 GN=LAMA1 PE=1 SV=2
995	P25391	1218	1351	1218	1359	PF00052.19	Laminin_B	Family	1	130	135	117	5.3e-34	1	CL0202	sp|P25391|LAMA1_HUMAN Laminin subunit alpha-1 OS=Homo sapiens OX=9606 GN=LAMA1 PE=1 SV=2
996	P25391	1361	1383	1358	1390	PF00053.25	Laminin_EGF	Domain	19	41	49	16.2	0.0087	1	CL0001	sp|P25391|LAMA1_HUMAN Laminin subunit alpha-1 OS=Homo sapiens OX=9606 GN=LAMA1 PE=1 SV=2
997	P25391	1403	1449	1403	1449	PF00053.25	Laminin_EGF	Domain	1	49	49	33.5	3.5e-08	1	CL0001	sp|P25391|LAMA1_HUMAN Laminin subunit alpha-1 OS=Homo sapiens OX=9606 GN=LAMA1 PE=1 SV=2
998	P25391	1452	1506	1452	1506	PF00053.25	Laminin_EGF	Domain	1	49	49	27.1	3.4e-06	1	CL0001	sp|P25391|LAMA1_HUMAN Laminin subunit alpha-1 OS=Homo sapiens OX=9606 GN=LAMA1 PE=1 SV=2
999	P25391	1509	1551	1509	1560	PF00053.25	Laminin_EGF	Domain	1	43	49	29.7	5.3e-07	1	CL0001	sp|P25391|LAMA1_HUMAN Laminin subunit alpha-1 OS=Homo sapiens OX=9606 GN=LAMA1 PE=1 SV=2
1000	P25391	1575	1830	1575	1831	PF06008.15	Laminin_I	Coiled-coil	1	258	259	271.4	8.8e-81	1	No_clan	sp|P25391|LAMA1_HUMAN Laminin subunit alpha-1 OS=Homo sapiens OX=9606 GN=LAMA1 PE=1 SV=2
1001	P25391	2011	2144	2011	2145	PF06009.13	Laminin_II	Coiled-coil	1	137	138	155.4	8.5e-46	1	No_clan	sp|P25391|LAMA1_HUMAN Laminin subunit alpha-1 OS=Homo sapiens OX=9606 GN=LAMA1 PE=1 SV=2
1002	P25391	2146	2282	2146	2283	PF00054.24	Laminin_G_1	Domain	1	130	131	94.6	5.3e-27	1	CL0004	sp|P25391|LAMA1_HUMAN Laminin subunit alpha-1 OS=Homo sapiens OX=9606 GN=LAMA1 PE=1 SV=2
1003	P25391	2333	2466	2333	2469	PF00054.24	Laminin_G_1	Domain	1	128	131	89.7	1.8e-25	1	CL0004	sp|P25391|LAMA1_HUMAN Laminin subunit alpha-1 OS=Homo sapiens OX=9606 GN=LAMA1 PE=1 SV=2
1004	P25391	2514	2657	2514	2658	PF00054.24	Laminin_G_1	Domain	1	130	131	104.7	4.1e-30	1	CL0004	sp|P25391|LAMA1_HUMAN Laminin subunit alpha-1 OS=Homo sapiens OX=9606 GN=LAMA1 PE=1 SV=2
1005	P25391	2743	2872	2743	2872	PF00054.24	Laminin_G_1	Domain	1	131	131	120.3	6.2e-35	1	CL0004	sp|P25391|LAMA1_HUMAN Laminin subunit alpha-1 OS=Homo sapiens OX=9606 GN=LAMA1 PE=1 SV=2
1006	P25391	2920	3049	2920	3051	PF00054.24	Laminin_G_1	Domain	1	129	131	102	2.8e-29	1	CL0004	sp|P25391|LAMA1_HUMAN Laminin subunit alpha-1 OS=Homo sapiens OX=9606 GN=LAMA1 PE=1 SV=2
1007	P24043	40	285	39	285	PF00055.18	Laminin_N	Family	2	233	233	226.8	2.6e-67	1	CL0202	sp|P24043|LAMA2_HUMAN Laminin subunit alpha-2 OS=Homo sapiens OX=9606 GN=LAMA2 PE=1 SV=4
1008	P24043	287	332	287	341	PF00053.25	Laminin_EGF	Domain	1	45	49	13.9	0.047	1	CL0001	sp|P24043|LAMA2_HUMAN Laminin subunit alpha-2 OS=Homo sapiens OX=9606 GN=LAMA2 PE=1 SV=4
1009	P24043	344	402	344	411	PF00053.25	Laminin_EGF	Domain	1	43	49	19.2	0.001	1	CL0001	sp|P24043|LAMA2_HUMAN Laminin subunit alpha-2 OS=Homo sapiens OX=9606 GN=LAMA2 PE=1 SV=4
1010	P24043	414	465	414	468	PF00053.25	Laminin_EGF	Domain	1	43	49	27.4	2.8e-06	1	CL0001	sp|P24043|LAMA2_HUMAN Laminin subunit alpha-2 OS=Homo sapiens OX=9606 GN=LAMA2 PE=1 SV=4
1011	P24043	469	515	469	515	PF00053.25	Laminin_EGF	Domain	1	49	49	24.7	1.9e-05	1	CL0001	sp|P24043|LAMA2_HUMAN Laminin subunit alpha-2 OS=Homo sapiens OX=9606 GN=LAMA2 PE=1 SV=4
1012	P24043	583	722	583	722	PF00052.19	Laminin_B	Family	1	135	135	97.4	6.3e-28	1	CL0202	sp|P24043|LAMA2_HUMAN Laminin subunit alpha-2 OS=Homo sapiens OX=9606 GN=LAMA2 PE=1 SV=4
1013	P24043	723	744	719	749	PF00053.25	Laminin_EGF	Domain	19	40	49	14.5	0.029	1	CL0001	sp|P24043|LAMA2_HUMAN Laminin subunit alpha-2 OS=Homo sapiens OX=9606 GN=LAMA2 PE=1 SV=4
1014	P24043	757	804	757	804	PF00053.25	Laminin_EGF	Domain	1	49	49	31.5	1.5e-07	1	CL0001	sp|P24043|LAMA2_HUMAN Laminin subunit alpha-2 OS=Homo sapiens OX=9606 GN=LAMA2 PE=1 SV=4
1015	P24043	807	862	807	862	PF00053.25	Laminin_EGF	Domain	1	49	49	26.8	4.2e-06	1	CL0001	sp|P24043|LAMA2_HUMAN Laminin subunit alpha-2 OS=Homo sapiens OX=9606 GN=LAMA2 PE=1 SV=4
1016	P24043	865	915	865	915	PF00053.25	Laminin_EGF	Domain	1	49	49	35.4	8.7e-09	1	CL0001	sp|P24043|LAMA2_HUMAN Laminin subunit alpha-2 OS=Homo sapiens OX=9606 GN=LAMA2 PE=1 SV=4
1017	P24043	918	964	918	964	PF00053.25	Laminin_EGF	Domain	1	49	49	38.2	1.2e-09	1	CL0001	sp|P24043|LAMA2_HUMAN Laminin subunit alpha-2 OS=Homo sapiens OX=9606 GN=LAMA2 PE=1 SV=4
1018	P24043	967	1011	967	1011	PF00053.25	Laminin_EGF	Domain	1	49	49	32.9	5.1e-08	1	CL0001	sp|P24043|LAMA2_HUMAN Laminin subunit alpha-2 OS=Homo sapiens OX=9606 GN=LAMA2 PE=1 SV=4
1019	P24043	1014	1057	1014	1057	PF00053.25	Laminin_EGF	Domain	1	49	49	30.6	2.8e-07	1	CL0001	sp|P24043|LAMA2_HUMAN Laminin subunit alpha-2 OS=Homo sapiens OX=9606 GN=LAMA2 PE=1 SV=4
1020	P24043	1060	1108	1060	1108	PF00053.25	Laminin_EGF	Domain	1	49	49	31.2	1.8e-07	1	CL0001	sp|P24043|LAMA2_HUMAN Laminin subunit alpha-2 OS=Homo sapiens OX=9606 GN=LAMA2 PE=1 SV=4
1021	P24043	1234	1378	1234	1378	PF00052.19	Laminin_B	Family	1	135	135	105.5	1.9e-30	1	CL0202	sp|P24043|LAMA2_HUMAN Laminin subunit alpha-2 OS=Homo sapiens OX=9606 GN=LAMA2 PE=1 SV=4
1022	P24043	1379	1405	1376	1408	PF00053.25	Laminin_EGF	Domain	19	45	49	19.2	0.001	1	CL0001	sp|P24043|LAMA2_HUMAN Laminin subunit alpha-2 OS=Homo sapiens OX=9606 GN=LAMA2 PE=1 SV=4
1023	P24043	1420	1466	1420	1466	PF00053.25	Laminin_EGF	Domain	1	49	49	31.2	1.8e-07	1	CL0001	sp|P24043|LAMA2_HUMAN Laminin subunit alpha-2 OS=Homo sapiens OX=9606 GN=LAMA2 PE=1 SV=4
1024	P24043	1469	1524	1469	1524	PF00053.25	Laminin_EGF	Domain	1	49	49	23.4	5e-05	1	CL0001	sp|P24043|LAMA2_HUMAN Laminin subunit alpha-2 OS=Homo sapiens OX=9606 GN=LAMA2 PE=1 SV=4
1025	P24043	1527	1567	1527	1578	PF00053.25	Laminin_EGF	Domain	1	41	49	25	1.5e-05	1	CL0001	sp|P24043|LAMA2_HUMAN Laminin subunit alpha-2 OS=Homo sapiens OX=9606 GN=LAMA2 PE=1 SV=4
1026	P24043	1593	1852	1593	1853	PF06008.15	Laminin_I	Coiled-coil	1	258	259	245.8	5.7e-73	1	No_clan	sp|P24043|LAMA2_HUMAN Laminin subunit alpha-2 OS=Homo sapiens OX=9606 GN=LAMA2 PE=1 SV=4
1027	P24043	2038	2172	2037	2173	PF06009.13	Laminin_II	Coiled-coil	2	137	138	149.3	6.6e-44	1	No_clan	sp|P24043|LAMA2_HUMAN Laminin subunit alpha-2 OS=Homo sapiens OX=9606 GN=LAMA2 PE=1 SV=4
1028	P24043	2174	2313	2174	2314	PF00054.24	Laminin_G_1	Domain	1	130	131	101.3	4.7e-29	1	CL0004	sp|P24043|LAMA2_HUMAN Laminin subunit alpha-2 OS=Homo sapiens OX=9606 GN=LAMA2 PE=1 SV=4
1029	P24043	2368	2507	2368	2507	PF00054.24	Laminin_G_1	Domain	1	131	131	115.5	1.9e-33	1	CL0004	sp|P24043|LAMA2_HUMAN Laminin subunit alpha-2 OS=Homo sapiens OX=9606 GN=LAMA2 PE=1 SV=4
1030	P24043	2554	2695	2554	2695	PF00054.24	Laminin_G_1	Domain	1	131	131	104.4	5.2e-30	1	CL0004	sp|P24043|LAMA2_HUMAN Laminin subunit alpha-2 OS=Homo sapiens OX=9606 GN=LAMA2 PE=1 SV=4
1031	P24043	2793	2920	2793	2921	PF00054.24	Laminin_G_1	Domain	1	130	131	124.9	2.3e-36	1	CL0004	sp|P24043|LAMA2_HUMAN Laminin subunit alpha-2 OS=Homo sapiens OX=9606 GN=LAMA2 PE=1 SV=4
1032	P24043	2968	3093	2968	3096	PF02210.25	Laminin_G_2	Domain	1	123	126	78.8	5.4e-22	1	CL0004	sp|P24043|LAMA2_HUMAN Laminin subunit alpha-2 OS=Homo sapiens OX=9606 GN=LAMA2 PE=1 SV=4
1033	Q16787	48	297	47	297	PF00055.18	Laminin_N	Family	2	233	233	251.9	5.8e-75	1	CL0202	sp|Q16787|LAMA3_HUMAN Laminin subunit alpha-3 OS=Homo sapiens OX=9606 GN=LAMA3 PE=1 SV=2
1034	Q16787	356	412	356	423	PF00053.25	Laminin_EGF	Domain	1	41	49	25.4	1.2e-05	1	CL0001	sp|Q16787|LAMA3_HUMAN Laminin subunit alpha-3 OS=Homo sapiens OX=9606 GN=LAMA3 PE=1 SV=2
1035	Q16787	426	465	426	469	PF00053.25	Laminin_EGF	Domain	1	42	49	28.7	1.1e-06	1	CL0001	sp|Q16787|LAMA3_HUMAN Laminin subunit alpha-3 OS=Homo sapiens OX=9606 GN=LAMA3 PE=1 SV=2
1036	Q16787	491	531	491	535	PF00053.25	Laminin_EGF	Domain	1	42	49	34	2.3e-08	1	CL0001	sp|Q16787|LAMA3_HUMAN Laminin subunit alpha-3 OS=Homo sapiens OX=9606 GN=LAMA3 PE=1 SV=2
1037	Q16787	536	581	536	586	PF00053.25	Laminin_EGF	Domain	1	44	49	37.4	2e-09	1	CL0001	sp|Q16787|LAMA3_HUMAN Laminin subunit alpha-3 OS=Homo sapiens OX=9606 GN=LAMA3 PE=1 SV=2
1038	Q16787	631	681	631	681	PF00053.25	Laminin_EGF	Domain	1	49	49	30.4	3.3e-07	1	CL0001	sp|Q16787|LAMA3_HUMAN Laminin subunit alpha-3 OS=Homo sapiens OX=9606 GN=LAMA3 PE=1 SV=2
1039	Q16787	684	722	684	729	PF00053.25	Laminin_EGF	Domain	1	39	49	22.8	7.6e-05	1	CL0001	sp|Q16787|LAMA3_HUMAN Laminin subunit alpha-3 OS=Homo sapiens OX=9606 GN=LAMA3 PE=1 SV=2
1040	Q16787	1266	1314	1266	1314	PF00053.25	Laminin_EGF	Domain	1	49	49	39.5	4.7e-10	1	CL0001	sp|Q16787|LAMA3_HUMAN Laminin subunit alpha-3 OS=Homo sapiens OX=9606 GN=LAMA3 PE=1 SV=2
1041	Q16787	1356	1401	1356	1404	PF00053.25	Laminin_EGF	Domain	1	43	49	38.1	1.3e-09	1	CL0001	sp|Q16787|LAMA3_HUMAN Laminin subunit alpha-3 OS=Homo sapiens OX=9606 GN=LAMA3 PE=1 SV=2
1042	Q16787	1405	1453	1405	1453	PF00053.25	Laminin_EGF	Domain	1	49	49	34.1	2.3e-08	1	CL0001	sp|Q16787|LAMA3_HUMAN Laminin subunit alpha-3 OS=Homo sapiens OX=9606 GN=LAMA3 PE=1 SV=2
1043	Q16787	1518	1652	1517	1652	PF00052.19	Laminin_B	Family	2	135	135	105.9	1.4e-30	1	CL0202	sp|Q16787|LAMA3_HUMAN Laminin subunit alpha-3 OS=Homo sapiens OX=9606 GN=LAMA3 PE=1 SV=2
1044	Q16787	1654	1677	1650	1684	PF00053.25	Laminin_EGF	Domain	20	43	49	15.5	0.014	1	CL0001	sp|Q16787|LAMA3_HUMAN Laminin subunit alpha-3 OS=Homo sapiens OX=9606 GN=LAMA3 PE=1 SV=2
1045	Q16787	1687	1731	1687	1731	PF00053.25	Laminin_EGF	Domain	1	49	49	30.6	2.8e-07	1	CL0001	sp|Q16787|LAMA3_HUMAN Laminin subunit alpha-3 OS=Homo sapiens OX=9606 GN=LAMA3 PE=1 SV=2
1046	Q16787	1734	1784	1734	1784	PF00053.25	Laminin_EGF	Domain	1	49	49	29.2	7.6e-07	1	CL0001	sp|Q16787|LAMA3_HUMAN Laminin subunit alpha-3 OS=Homo sapiens OX=9606 GN=LAMA3 PE=1 SV=2
1047	Q16787	1847	2105	1847	2105	PF06008.15	Laminin_I	Coiled-coil	1	259	259	307.8	7.3e-92	1	No_clan	sp|Q16787|LAMA3_HUMAN Laminin subunit alpha-3 OS=Homo sapiens OX=9606 GN=LAMA3 PE=1 SV=2
1048	Q16787	2288	2416	2288	2416	PF06009.13	Laminin_II	Coiled-coil	1	138	138	131.4	2.1e-38	1	No_clan	sp|Q16787|LAMA3_HUMAN Laminin subunit alpha-3 OS=Homo sapiens OX=9606 GN=LAMA3 PE=1 SV=2
1049	Q16787	2435	2570	2431	2573	PF00054.24	Laminin_G_1	Domain	9	128	131	23.9	3.9e-05	1	CL0004	sp|Q16787|LAMA3_HUMAN Laminin subunit alpha-3 OS=Homo sapiens OX=9606 GN=LAMA3 PE=1 SV=2
1050	Q16787	2627	2742	2626	2745	PF02210.25	Laminin_G_2	Domain	2	122	126	52.4	8e-14	1	CL0004	sp|Q16787|LAMA3_HUMAN Laminin subunit alpha-3 OS=Homo sapiens OX=9606 GN=LAMA3 PE=1 SV=2
1051	Q16787	2797	2901	2797	2903	PF02210.25	Laminin_G_2	Domain	1	123	126	29.7	8.2e-07	1	CL0004	sp|Q16787|LAMA3_HUMAN Laminin subunit alpha-3 OS=Homo sapiens OX=9606 GN=LAMA3 PE=1 SV=2
1052	Q16787	3017	3135	3016	3136	PF02210.25	Laminin_G_2	Domain	2	125	126	73.3	2.7e-20	1	CL0004	sp|Q16787|LAMA3_HUMAN Laminin subunit alpha-3 OS=Homo sapiens OX=9606 GN=LAMA3 PE=1 SV=2
1053	Q16787	3186	3310	3186	3311	PF02210.25	Laminin_G_2	Domain	1	125	126	76.8	2.2e-21	1	CL0004	sp|Q16787|LAMA3_HUMAN Laminin subunit alpha-3 OS=Homo sapiens OX=9606 GN=LAMA3 PE=1 SV=2
1054	Q14767	562	596	562	599	PF00683.18	TB	Family	1	34	45	27.7	1.7e-06	1	No_clan	sp|Q14767|LTBP2_HUMAN Latent-transforming growth factor beta-binding protein 2 OS=Homo sapiens OX=9606 GN=LTBP2 PE=1 SV=3
1055	Q14767	622	661	622	661	PF07645.16	EGF_CA	Domain	1	42	42	30.2	4e-07	1	CL0001	sp|Q14767|LTBP2_HUMAN Latent-transforming growth factor beta-binding protein 2 OS=Homo sapiens OX=9606 GN=LTBP2 PE=1 SV=3
1056	Q14767	683	727	682	727	PF00683.18	TB	Family	2	45	45	60.7	8.4e-17	1	No_clan	sp|Q14767|LTBP2_HUMAN Latent-transforming growth factor beta-binding protein 2 OS=Homo sapiens OX=9606 GN=LTBP2 PE=1 SV=3
1057	Q14767	845	885	844	885	PF07645.16	EGF_CA	Domain	2	42	42	21.3	0.00024	1	CL0001	sp|Q14767|LTBP2_HUMAN Latent-transforming growth factor beta-binding protein 2 OS=Homo sapiens OX=9606 GN=LTBP2 PE=1 SV=3
1058	Q14767	887	928	887	928	PF07645.16	EGF_CA	Domain	1	42	42	26.3	6.2e-06	1	CL0001	sp|Q14767|LTBP2_HUMAN Latent-transforming growth factor beta-binding protein 2 OS=Homo sapiens OX=9606 GN=LTBP2 PE=1 SV=3
1059	Q14767	930	961	930	968	PF07645.16	EGF_CA	Domain	1	34	42	30.9	2.4e-07	1	CL0001	sp|Q14767|LTBP2_HUMAN Latent-transforming growth factor beta-binding protein 2 OS=Homo sapiens OX=9606 GN=LTBP2 PE=1 SV=3
1060	Q14767	970	1007	970	1008	PF07645.16	EGF_CA	Domain	1	41	42	29.2	8e-07	1	CL0001	sp|Q14767|LTBP2_HUMAN Latent-transforming growth factor beta-binding protein 2 OS=Homo sapiens OX=9606 GN=LTBP2 PE=1 SV=3
1061	Q14767	1010	1049	1010	1049	PF07645.16	EGF_CA	Domain	1	42	42	35.8	7.1e-09	1	CL0001	sp|Q14767|LTBP2_HUMAN Latent-transforming growth factor beta-binding protein 2 OS=Homo sapiens OX=9606 GN=LTBP2 PE=1 SV=3
1062	Q14767	1051	1091	1051	1091	PF07645.16	EGF_CA	Domain	1	42	42	39.3	5.7e-10	1	CL0001	sp|Q14767|LTBP2_HUMAN Latent-transforming growth factor beta-binding protein 2 OS=Homo sapiens OX=9606 GN=LTBP2 PE=1 SV=3
1063	Q14767	1093	1133	1093	1133	PF07645.16	EGF_CA	Domain	1	42	42	35.9	6.6e-09	1	CL0001	sp|Q14767|LTBP2_HUMAN Latent-transforming growth factor beta-binding protein 2 OS=Homo sapiens OX=9606 GN=LTBP2 PE=1 SV=3
1064	Q14767	1135	1174	1135	1174	PF07645.16	EGF_CA	Domain	1	42	42	39.5	4.8e-10	1	CL0001	sp|Q14767|LTBP2_HUMAN Latent-transforming growth factor beta-binding protein 2 OS=Homo sapiens OX=9606 GN=LTBP2 PE=1 SV=3
1065	Q14767	1176	1216	1176	1216	PF07645.16	EGF_CA	Domain	1	42	42	32.7	6.3e-08	1	CL0001	sp|Q14767|LTBP2_HUMAN Latent-transforming growth factor beta-binding protein 2 OS=Homo sapiens OX=9606 GN=LTBP2 PE=1 SV=3
1066	Q14767	1218	1257	1218	1257	PF07645.16	EGF_CA	Domain	1	42	42	36.6	3.8e-09	1	CL0001	sp|Q14767|LTBP2_HUMAN Latent-transforming growth factor beta-binding protein 2 OS=Homo sapiens OX=9606 GN=LTBP2 PE=1 SV=3
1067	Q14767	1259	1300	1259	1301	PF07645.16	EGF_CA	Domain	1	41	42	26.4	6e-06	1	CL0001	sp|Q14767|LTBP2_HUMAN Latent-transforming growth factor beta-binding protein 2 OS=Homo sapiens OX=9606 GN=LTBP2 PE=1 SV=3
1068	Q14767	1303	1343	1303	1343	PF07645.16	EGF_CA	Domain	1	42	42	34.7	1.5e-08	1	CL0001	sp|Q14767|LTBP2_HUMAN Latent-transforming growth factor beta-binding protein 2 OS=Homo sapiens OX=9606 GN=LTBP2 PE=1 SV=3
1069	Q14767	1345	1385	1345	1386	PF07645.16	EGF_CA	Domain	1	41	42	23.7	4e-05	1	CL0001	sp|Q14767|LTBP2_HUMAN Latent-transforming growth factor beta-binding protein 2 OS=Homo sapiens OX=9606 GN=LTBP2 PE=1 SV=3
1070	Q14767	1423	1466	1422	1466	PF00683.18	TB	Family	2	45	45	51.9	4.7e-14	1	No_clan	sp|Q14767|LTBP2_HUMAN Latent-transforming growth factor beta-binding protein 2 OS=Homo sapiens OX=9606 GN=LTBP2 PE=1 SV=3
1071	Q14767	1485	1526	1485	1526	PF07645.16	EGF_CA	Domain	1	42	42	24.6	2.1e-05	1	CL0001	sp|Q14767|LTBP2_HUMAN Latent-transforming growth factor beta-binding protein 2 OS=Homo sapiens OX=9606 GN=LTBP2 PE=1 SV=3
1072	Q14767	1528	1556	1528	1566	PF07645.16	EGF_CA	Domain	1	32	42	22	0.00014	1	CL0001	sp|Q14767|LTBP2_HUMAN Latent-transforming growth factor beta-binding protein 2 OS=Homo sapiens OX=9606 GN=LTBP2 PE=1 SV=3
1073	Q14767	1595	1637	1594	1639	PF00683.18	TB	Family	2	43	45	48.7	4.9e-13	1	No_clan	sp|Q14767|LTBP2_HUMAN Latent-transforming growth factor beta-binding protein 2 OS=Homo sapiens OX=9606 GN=LTBP2 PE=1 SV=3
1074	Q14767	1737	1764	1737	1766	PF00008.28	EGF	Domain	1	29	32	21.8	0.00017	1	CL0001	sp|Q14767|LTBP2_HUMAN Latent-transforming growth factor beta-binding protein 2 OS=Homo sapiens OX=9606 GN=LTBP2 PE=1 SV=3
1075	Q14767	1774	1817	1774	1817	PF07645.16	EGF_CA	Domain	1	42	42	29.2	7.7e-07	1	CL0001	sp|Q14767|LTBP2_HUMAN Latent-transforming growth factor beta-binding protein 2 OS=Homo sapiens OX=9606 GN=LTBP2 PE=1 SV=3
1076	Q8N2S1	357	396	357	396	PF07645.16	EGF_CA	Domain	1	42	42	34.6	1.6e-08	1	CL0001	sp|Q8N2S1|LTBP4_HUMAN Latent-transforming growth factor beta-binding protein 4 OS=Homo sapiens OX=9606 GN=LTBP4 PE=1 SV=2
1077	Q8N2S1	418	462	417	462	PF00683.18	TB	Family	2	45	45	53.9	1.1e-14	1	No_clan	sp|Q8N2S1|LTBP4_HUMAN Latent-transforming growth factor beta-binding protein 4 OS=Homo sapiens OX=9606 GN=LTBP4 PE=1 SV=2
1078	Q8N2S1	556	576	556	576	PF12661.8	hEGF	Domain	1	22	22	13.7	0.074	1	CL0001	sp|Q8N2S1|LTBP4_HUMAN Latent-transforming growth factor beta-binding protein 4 OS=Homo sapiens OX=9606 GN=LTBP4 PE=1 SV=2
1079	Q8N2S1	587	627	587	627	PF07645.16	EGF_CA	Domain	1	42	42	36.1	5.6e-09	1	CL0001	sp|Q8N2S1|LTBP4_HUMAN Latent-transforming growth factor beta-binding protein 4 OS=Homo sapiens OX=9606 GN=LTBP4 PE=1 SV=2
1080	Q8N2S1	629	669	629	669	PF07645.16	EGF_CA	Domain	1	42	42	37.7	1.7e-09	1	CL0001	sp|Q8N2S1|LTBP4_HUMAN Latent-transforming growth factor beta-binding protein 4 OS=Homo sapiens OX=9606 GN=LTBP4 PE=1 SV=2
1081	Q8N2S1	671	703	671	709	PF07645.16	EGF_CA	Domain	1	34	42	30.9	2.4e-07	1	CL0001	sp|Q8N2S1|LTBP4_HUMAN Latent-transforming growth factor beta-binding protein 4 OS=Homo sapiens OX=9606 GN=LTBP4 PE=1 SV=2
1082	Q8N2S1	710	750	710	750	PF07645.16	EGF_CA	Domain	1	42	42	35.6	7.8e-09	1	CL0001	sp|Q8N2S1|LTBP4_HUMAN Latent-transforming growth factor beta-binding protein 4 OS=Homo sapiens OX=9606 GN=LTBP4 PE=1 SV=2
1083	Q8N2S1	752	792	752	792	PF07645.16	EGF_CA	Domain	1	42	42	39.6	4.3e-10	1	CL0001	sp|Q8N2S1|LTBP4_HUMAN Latent-transforming growth factor beta-binding protein 4 OS=Homo sapiens OX=9606 GN=LTBP4 PE=1 SV=2
1084	Q8N2S1	794	826	794	832	PF07645.16	EGF_CA	Domain	1	34	42	27.1	3.6e-06	1	CL0001	sp|Q8N2S1|LTBP4_HUMAN Latent-transforming growth factor beta-binding protein 4 OS=Homo sapiens OX=9606 GN=LTBP4 PE=1 SV=2
1085	Q8N2S1	834	871	834	876	PF07645.16	EGF_CA	Domain	1	37	42	42.5	5.6e-11	1	CL0001	sp|Q8N2S1|LTBP4_HUMAN Latent-transforming growth factor beta-binding protein 4 OS=Homo sapiens OX=9606 GN=LTBP4 PE=1 SV=2
1086	Q8N2S1	878	918	878	918	PF07645.16	EGF_CA	Domain	1	42	42	37.3	2.3e-09	1	CL0001	sp|Q8N2S1|LTBP4_HUMAN Latent-transforming growth factor beta-binding protein 4 OS=Homo sapiens OX=9606 GN=LTBP4 PE=1 SV=2
1087	Q8N2S1	920	959	920	959	PF07645.16	EGF_CA	Domain	1	42	42	34.6	1.6e-08	1	CL0001	sp|Q8N2S1|LTBP4_HUMAN Latent-transforming growth factor beta-binding protein 4 OS=Homo sapiens OX=9606 GN=LTBP4 PE=1 SV=2
1088	Q8N2S1	961	1002	961	1003	PF07645.16	EGF_CA	Domain	1	41	42	30.6	2.9e-07	1	CL0001	sp|Q8N2S1|LTBP4_HUMAN Latent-transforming growth factor beta-binding protein 4 OS=Homo sapiens OX=9606 GN=LTBP4 PE=1 SV=2
1089	Q8N2S1	1005	1042	1005	1047	PF07645.16	EGF_CA	Domain	1	36	42	31.4	1.6e-07	1	CL0001	sp|Q8N2S1|LTBP4_HUMAN Latent-transforming growth factor beta-binding protein 4 OS=Homo sapiens OX=9606 GN=LTBP4 PE=1 SV=2
1090	Q8N2S1	1049	1089	1049	1089	PF07645.16	EGF_CA	Domain	1	42	42	36.6	3.9e-09	1	CL0001	sp|Q8N2S1|LTBP4_HUMAN Latent-transforming growth factor beta-binding protein 4 OS=Homo sapiens OX=9606 GN=LTBP4 PE=1 SV=2
1091	Q8N2S1	1091	1121	1091	1132	PF07645.16	EGF_CA	Domain	1	32	42	26.1	7.6e-06	1	CL0001	sp|Q8N2S1|LTBP4_HUMAN Latent-transforming growth factor beta-binding protein 4 OS=Homo sapiens OX=9606 GN=LTBP4 PE=1 SV=2
1092	Q8N2S1	1193	1238	1192	1238	PF00683.18	TB	Family	2	45	45	49.2	3.2e-13	1	No_clan	sp|Q8N2S1|LTBP4_HUMAN Latent-transforming growth factor beta-binding protein 4 OS=Homo sapiens OX=9606 GN=LTBP4 PE=1 SV=2
1093	Q8N2S1	1253	1294	1253	1294	PF07645.16	EGF_CA	Domain	1	42	42	27.4	2.9e-06	1	CL0001	sp|Q8N2S1|LTBP4_HUMAN Latent-transforming growth factor beta-binding protein 4 OS=Homo sapiens OX=9606 GN=LTBP4 PE=1 SV=2
1094	Q8N2S1	1296	1325	1296	1336	PF07645.16	EGF_CA	Domain	1	31	42	25.6	1.1e-05	1	CL0001	sp|Q8N2S1|LTBP4_HUMAN Latent-transforming growth factor beta-binding protein 4 OS=Homo sapiens OX=9606 GN=LTBP4 PE=1 SV=2
1095	Q8N2S1	1361	1403	1360	1404	PF00683.18	TB	Family	2	43	45	49.6	2.4e-13	1	No_clan	sp|Q8N2S1|LTBP4_HUMAN Latent-transforming growth factor beta-binding protein 4 OS=Homo sapiens OX=9606 GN=LTBP4 PE=1 SV=2
1096	Q8N2S1	1574	1617	1574	1617	PF07645.16	EGF_CA	Domain	1	42	42	34.2	2.1e-08	1	CL0001	sp|Q8N2S1|LTBP4_HUMAN Latent-transforming growth factor beta-binding protein 4 OS=Homo sapiens OX=9606 GN=LTBP4 PE=1 SV=2
1097	Q9Y493	41	203	41	203	PF00629.24	MAM	Domain	1	160	160	113.8	7.3e-33	1	CL0004	sp|Q9Y493|ZAN_HUMAN Zonadhesin OS=Homo sapiens OX=9606 GN=ZAN PE=2 SV=5
1098	Q9Y493	211	366	211	367	PF00629.24	MAM	Domain	1	159	160	85.2	4.5e-24	1	CL0004	sp|Q9Y493|ZAN_HUMAN Zonadhesin OS=Homo sapiens OX=9606 GN=ZAN PE=2 SV=5
1099	Q9Y493	373	535	373	535	PF00629.24	MAM	Domain	1	160	160	116.8	8.7e-34	1	CL0004	sp|Q9Y493|ZAN_HUMAN Zonadhesin OS=Homo sapiens OX=9606 GN=ZAN PE=2 SV=5
1100	Q9Y493	1044	1093	1044	1093	PF01826.18	TIL	Domain	1	55	55	31.8	1.2e-07	1	No_clan	sp|Q9Y493|ZAN_HUMAN Zonadhesin OS=Homo sapiens OX=9606 GN=ZAN PE=2 SV=5
1101	Q9Y493	1094	1148	1094	1148	PF12714.8	TILa	Domain	1	55	55	59.4	2.5e-16	1	CL0451	sp|Q9Y493|ZAN_HUMAN Zonadhesin OS=Homo sapiens OX=9606 GN=ZAN PE=2 SV=5
1102	Q9Y493	1156	1307	1156	1308	PF00094.26	VWD	Family	1	156	157	146.7	6.8e-43	1	No_clan	sp|Q9Y493|ZAN_HUMAN Zonadhesin OS=Homo sapiens OX=9606 GN=ZAN PE=2 SV=5
1103	Q9Y493	1355	1422	1354	1422	PF08742.12	C8	Domain	2	69	69	53.8	1.9e-14	1	No_clan	sp|Q9Y493|ZAN_HUMAN Zonadhesin OS=Homo sapiens OX=9606 GN=ZAN PE=2 SV=5
1104	Q9Y493	1426	1479	1426	1479	PF01826.18	TIL	Domain	1	55	55	40.9	1.9e-10	1	No_clan	sp|Q9Y493|ZAN_HUMAN Zonadhesin OS=Homo sapiens OX=9606 GN=ZAN PE=2 SV=5
1105	Q9Y493	1480	1535	1480	1535	PF12714.8	TILa	Domain	1	55	55	61.9	4e-17	1	CL0451	sp|Q9Y493|ZAN_HUMAN Zonadhesin OS=Homo sapiens OX=9606 GN=ZAN PE=2 SV=5
1106	Q9Y493	1542	1696	1542	1697	PF00094.26	VWD	Family	1	156	157	135.1	2.4e-39	1	No_clan	sp|Q9Y493|ZAN_HUMAN Zonadhesin OS=Homo sapiens OX=9606 GN=ZAN PE=2 SV=5
1107	Q9Y493	1742	1808	1741	1808	PF08742.12	C8	Domain	2	69	69	64.3	1e-17	1	No_clan	sp|Q9Y493|ZAN_HUMAN Zonadhesin OS=Homo sapiens OX=9606 GN=ZAN PE=2 SV=5
1108	Q9Y493	1812	1867	1812	1867	PF01826.18	TIL	Domain	1	55	55	37.9	1.5e-09	1	No_clan	sp|Q9Y493|ZAN_HUMAN Zonadhesin OS=Homo sapiens OX=9606 GN=ZAN PE=2 SV=5
1109	Q9Y493	1868	1924	1868	1924	PF12714.8	TILa	Domain	1	55	55	55.2	5e-15	1	CL0451	sp|Q9Y493|ZAN_HUMAN Zonadhesin OS=Homo sapiens OX=9606 GN=ZAN PE=2 SV=5
1110	Q9Y493	1931	2085	1931	2086	PF00094.26	VWD	Family	1	156	157	111.9	3.5e-32	1	No_clan	sp|Q9Y493|ZAN_HUMAN Zonadhesin OS=Homo sapiens OX=9606 GN=ZAN PE=2 SV=5
1111	Q9Y493	2141	2207	2140	2207	PF08742.12	C8	Domain	2	69	69	44.6	1.4e-11	1	No_clan	sp|Q9Y493|ZAN_HUMAN Zonadhesin OS=Homo sapiens OX=9606 GN=ZAN PE=2 SV=5
1112	Q9Y493	2211	2267	2211	2267	PF01826.18	TIL	Domain	1	55	55	41.7	1.1e-10	1	No_clan	sp|Q9Y493|ZAN_HUMAN Zonadhesin OS=Homo sapiens OX=9606 GN=ZAN PE=2 SV=5
1113	Q9Y493	2268	2323	2268	2324	PF12714.8	TILa	Domain	1	54	55	62.5	2.6e-17	1	CL0451	sp|Q9Y493|ZAN_HUMAN Zonadhesin OS=Homo sapiens OX=9606 GN=ZAN PE=2 SV=5
1114	Q9Y493	2331	2484	2331	2485	PF00094.26	VWD	Family	1	156	157	98	6.6e-28	1	No_clan	sp|Q9Y493|ZAN_HUMAN Zonadhesin OS=Homo sapiens OX=9606 GN=ZAN PE=2 SV=5
1115	Q9Y493	2547	2595	2546	2598	PF08742.12	C8	Domain	2	48	69	42.4	7.2e-11	1	No_clan	sp|Q9Y493|ZAN_HUMAN Zonadhesin OS=Homo sapiens OX=9606 GN=ZAN PE=2 SV=5
1116	Q9Y493	2653	2706	2653	2707	PF12714.8	TILa	Domain	1	54	55	49.9	2.3e-13	1	CL0451	sp|Q9Y493|ZAN_HUMAN Zonadhesin OS=Homo sapiens OX=9606 GN=ZAN PE=2 SV=5
1117	O60494	136	165	136	166	PF00008.28	EGF	Domain	1	31	32	28.6	1.3e-06	1	CL0001	sp|O60494|CUBN_HUMAN Cubilin OS=Homo sapiens OX=9606 GN=CUBN PE=1 SV=5
1118	O60494	170	204	170	217	PF07645.16	EGF_CA	Domain	1	32	42	26.5	5.7e-06	1	CL0001	sp|O60494|CUBN_HUMAN Cubilin OS=Homo sapiens OX=9606 GN=CUBN PE=1 SV=5
1119	O60494	263	297	263	303	PF07645.16	EGF_CA	Domain	1	34	42	26.3	6.3e-06	1	CL0001	sp|O60494|CUBN_HUMAN Cubilin OS=Homo sapiens OX=9606 GN=CUBN PE=1 SV=5
1120	O60494	305	347	305	347	PF07645.16	EGF_CA	Domain	1	42	42	21.9	0.00015	1	CL0001	sp|O60494|CUBN_HUMAN Cubilin OS=Homo sapiens OX=9606 GN=CUBN PE=1 SV=5
1121	O60494	353	387	353	388	PF12947.8	EGF_3	Domain	1	34	36	36.5	4e-09	1	CL0001	sp|O60494|CUBN_HUMAN Cubilin OS=Homo sapiens OX=9606 GN=CUBN PE=1 SV=5
1122	O60494	399	427	399	428	PF00008.28	EGF	Domain	1	31	32	29.5	6.9e-07	1	CL0001	sp|O60494|CUBN_HUMAN Cubilin OS=Homo sapiens OX=9606 GN=CUBN PE=1 SV=5
1123	O60494	436	465	436	466	PF00008.28	EGF	Domain	1	31	32	33.1	5.2e-08	1	CL0001	sp|O60494|CUBN_HUMAN Cubilin OS=Homo sapiens OX=9606 GN=CUBN PE=1 SV=5
1124	O60494	474	582	474	583	PF00431.21	CUB	Domain	1	109	110	64.5	9.9e-18	1	CL0164	sp|O60494|CUBN_HUMAN Cubilin OS=Homo sapiens OX=9606 GN=CUBN PE=1 SV=5
1125	O60494	590	699	590	699	PF00431.21	CUB	Domain	1	110	110	88.9	2.6e-25	1	CL0164	sp|O60494|CUBN_HUMAN Cubilin OS=Homo sapiens OX=9606 GN=CUBN PE=1 SV=5
1126	O60494	708	813	708	813	PF00431.21	CUB	Domain	1	110	110	66.1	3.3e-18	1	CL0164	sp|O60494|CUBN_HUMAN Cubilin OS=Homo sapiens OX=9606 GN=CUBN PE=1 SV=5
1127	O60494	817	925	817	925	PF00431.21	CUB	Domain	1	110	110	72.7	2.8e-20	1	CL0164	sp|O60494|CUBN_HUMAN Cubilin OS=Homo sapiens OX=9606 GN=CUBN PE=1 SV=5
1128	O60494	932	1039	932	1039	PF00431.21	CUB	Domain	1	110	110	99.7	1.2e-28	1	CL0164	sp|O60494|CUBN_HUMAN Cubilin OS=Homo sapiens OX=9606 GN=CUBN PE=1 SV=5
1129	O60494	1048	1157	1048	1158	PF00431.21	CUB	Domain	1	109	110	91.6	3.7e-26	1	CL0164	sp|O60494|CUBN_HUMAN Cubilin OS=Homo sapiens OX=9606 GN=CUBN PE=1 SV=5
1130	O60494	1165	1274	1165	1274	PF00431.21	CUB	Domain	1	110	110	104.9	2.9e-30	1	CL0164	sp|O60494|CUBN_HUMAN Cubilin OS=Homo sapiens OX=9606 GN=CUBN PE=1 SV=5
1131	O60494	1278	1385	1278	1386	PF00431.21	CUB	Domain	1	109	110	79.6	2.1e-22	1	CL0164	sp|O60494|CUBN_HUMAN Cubilin OS=Homo sapiens OX=9606 GN=CUBN PE=1 SV=5
1132	O60494	1391	1502	1391	1503	PF00431.21	CUB	Domain	1	109	110	96.7	9.9e-28	1	CL0164	sp|O60494|CUBN_HUMAN Cubilin OS=Homo sapiens OX=9606 GN=CUBN PE=1 SV=5
1133	O60494	1510	1616	1510	1616	PF00431.21	CUB	Domain	1	110	110	89.2	2.1e-25	1	CL0164	sp|O60494|CUBN_HUMAN Cubilin OS=Homo sapiens OX=9606 GN=CUBN PE=1 SV=5
1134	O60494	1620	1729	1620	1731	PF00431.21	CUB	Domain	1	108	110	105	2.6e-30	1	CL0164	sp|O60494|CUBN_HUMAN Cubilin OS=Homo sapiens OX=9606 GN=CUBN PE=1 SV=5
1135	O60494	1738	1847	1738	1847	PF00431.21	CUB	Domain	1	110	110	90.8	6.9e-26	1	CL0164	sp|O60494|CUBN_HUMAN Cubilin OS=Homo sapiens OX=9606 GN=CUBN PE=1 SV=5
1136	O60494	1856	1959	1852	1960	PF00431.21	CUB	Domain	5	109	110	74.4	8.4e-21	1	CL0164	sp|O60494|CUBN_HUMAN Cubilin OS=Homo sapiens OX=9606 GN=CUBN PE=1 SV=5
1137	O60494	1986	2088	1978	2088	PF00431.21	CUB	Domain	7	110	110	90.5	8.2e-26	1	CL0164	sp|O60494|CUBN_HUMAN Cubilin OS=Homo sapiens OX=9606 GN=CUBN PE=1 SV=5
1138	O60494	2092	2210	2092	2210	PF00431.21	CUB	Domain	1	110	110	75.4	4.1e-21	1	CL0164	sp|O60494|CUBN_HUMAN Cubilin OS=Homo sapiens OX=9606 GN=CUBN PE=1 SV=5
1139	O60494	2217	2331	2217	2331	PF00431.21	CUB	Domain	1	110	110	90.8	7e-26	1	CL0164	sp|O60494|CUBN_HUMAN Cubilin OS=Homo sapiens OX=9606 GN=CUBN PE=1 SV=5
1140	O60494	2336	2445	2336	2445	PF00431.21	CUB	Domain	1	110	110	86.2	1.8e-24	1	CL0164	sp|O60494|CUBN_HUMAN Cubilin OS=Homo sapiens OX=9606 GN=CUBN PE=1 SV=5
1141	O60494	2452	2562	2452	2562	PF00431.21	CUB	Domain	1	110	110	81.5	5.4e-23	1	CL0164	sp|O60494|CUBN_HUMAN Cubilin OS=Homo sapiens OX=9606 GN=CUBN PE=1 SV=5
1142	O60494	2570	2684	2570	2684	PF00431.21	CUB	Domain	1	110	110	67.3	1.3e-18	1	CL0164	sp|O60494|CUBN_HUMAN Cubilin OS=Homo sapiens OX=9606 GN=CUBN PE=1 SV=5
1143	O60494	2689	2797	2689	2798	PF00431.21	CUB	Domain	1	109	110	96.2	1.5e-27	1	CL0164	sp|O60494|CUBN_HUMAN Cubilin OS=Homo sapiens OX=9606 GN=CUBN PE=1 SV=5
1144	O60494	2805	2916	2805	2916	PF00431.21	CUB	Domain	1	110	110	55.6	5.7e-15	1	CL0164	sp|O60494|CUBN_HUMAN Cubilin OS=Homo sapiens OX=9606 GN=CUBN PE=1 SV=5
1145	O60494	2920	3032	2920	3032	PF00431.21	CUB	Domain	1	110	110	71.4	7e-20	1	CL0164	sp|O60494|CUBN_HUMAN Cubilin OS=Homo sapiens OX=9606 GN=CUBN PE=1 SV=5
1146	O60494	3037	3147	3037	3147	PF00431.21	CUB	Domain	1	110	110	99.2	1.7e-28	1	CL0164	sp|O60494|CUBN_HUMAN Cubilin OS=Homo sapiens OX=9606 GN=CUBN PE=1 SV=5
1147	O60494	3157	3271	3157	3271	PF00431.21	CUB	Domain	1	110	110	89.9	1.3e-25	1	CL0164	sp|O60494|CUBN_HUMAN Cubilin OS=Homo sapiens OX=9606 GN=CUBN PE=1 SV=5
1148	O60494	3278	3381	3278	3390	PF00431.21	CUB	Domain	1	101	110	37.3	2.8e-09	1	CL0164	sp|O60494|CUBN_HUMAN Cubilin OS=Homo sapiens OX=9606 GN=CUBN PE=1 SV=5
1149	O60494	3395	3502	3395	3504	PF00431.21	CUB	Domain	1	108	110	90	1.2e-25	1	CL0164	sp|O60494|CUBN_HUMAN Cubilin OS=Homo sapiens OX=9606 GN=CUBN PE=1 SV=5
1150	O60494	3511	3620	3511	3621	PF00431.21	CUB	Domain	1	109	110	76.6	1.7e-21	1	CL0164	sp|O60494|CUBN_HUMAN Cubilin OS=Homo sapiens OX=9606 GN=CUBN PE=1 SV=5
1151	Q14766	567	611	567	612	PF00683.18	TB	Family	1	43	45	28.4	1.1e-06	1	No_clan	sp|Q14766|LTBP1_HUMAN Latent-transforming growth factor beta-binding protein 1 OS=Homo sapiens OX=9606 GN=LTBP1 PE=1 SV=4
1152	Q14766	626	665	626	665	PF07645.16	EGF_CA	Domain	1	42	42	31.9	1.1e-07	1	CL0001	sp|Q14766|LTBP1_HUMAN Latent-transforming growth factor beta-binding protein 1 OS=Homo sapiens OX=9606 GN=LTBP1 PE=1 SV=4
1153	Q14766	688	732	688	732	PF00683.18	TB	Family	1	45	45	61.4	4.9e-17	1	No_clan	sp|Q14766|LTBP1_HUMAN Latent-transforming growth factor beta-binding protein 1 OS=Homo sapiens OX=9606 GN=LTBP1 PE=1 SV=4
1154	Q14766	874	913	873	913	PF07645.16	EGF_CA	Domain	2	42	42	19.4	0.00094	1	CL0001	sp|Q14766|LTBP1_HUMAN Latent-transforming growth factor beta-binding protein 1 OS=Homo sapiens OX=9606 GN=LTBP1 PE=1 SV=4
1155	Q14766	915	955	915	955	PF07645.16	EGF_CA	Domain	1	42	42	41.4	1.2e-10	1	CL0001	sp|Q14766|LTBP1_HUMAN Latent-transforming growth factor beta-binding protein 1 OS=Homo sapiens OX=9606 GN=LTBP1 PE=1 SV=4
1156	Q14766	957	996	957	996	PF07645.16	EGF_CA	Domain	1	42	42	30.9	2.3e-07	1	CL0001	sp|Q14766|LTBP1_HUMAN Latent-transforming growth factor beta-binding protein 1 OS=Homo sapiens OX=9606 GN=LTBP1 PE=1 SV=4
1157	Q14766	998	1033	998	1036	PF07645.16	EGF_CA	Domain	1	39	42	29.3	7.2e-07	1	CL0001	sp|Q14766|LTBP1_HUMAN Latent-transforming growth factor beta-binding protein 1 OS=Homo sapiens OX=9606 GN=LTBP1 PE=1 SV=4
1158	Q14766	1059	1082	1059	1082	PF12662.8	cEGF	Domain	1	24	24	34.5	1.5e-08	1	CL0001	sp|Q14766|LTBP1_HUMAN Latent-transforming growth factor beta-binding protein 1 OS=Homo sapiens OX=9606 GN=LTBP1 PE=1 SV=4
1159	Q14766	1120	1159	1120	1159	PF07645.16	EGF_CA	Domain	1	42	42	37.2	2.5e-09	1	CL0001	sp|Q14766|LTBP1_HUMAN Latent-transforming growth factor beta-binding protein 1 OS=Homo sapiens OX=9606 GN=LTBP1 PE=1 SV=4
1160	Q14766	1161	1200	1161	1200	PF07645.16	EGF_CA	Domain	1	42	42	36.3	4.9e-09	1	CL0001	sp|Q14766|LTBP1_HUMAN Latent-transforming growth factor beta-binding protein 1 OS=Homo sapiens OX=9606 GN=LTBP1 PE=1 SV=4
1161	Q14766	1202	1242	1202	1242	PF07645.16	EGF_CA	Domain	1	42	42	36.3	4.8e-09	1	CL0001	sp|Q14766|LTBP1_HUMAN Latent-transforming growth factor beta-binding protein 1 OS=Homo sapiens OX=9606 GN=LTBP1 PE=1 SV=4
1162	Q14766	1244	1284	1244	1284	PF07645.16	EGF_CA	Domain	1	42	42	33.5	3.6e-08	1	CL0001	sp|Q14766|LTBP1_HUMAN Latent-transforming growth factor beta-binding protein 1 OS=Homo sapiens OX=9606 GN=LTBP1 PE=1 SV=4
1163	Q14766	1286	1316	1286	1327	PF07645.16	EGF_CA	Domain	1	32	42	20.7	0.00036	1	CL0001	sp|Q14766|LTBP1_HUMAN Latent-transforming growth factor beta-binding protein 1 OS=Homo sapiens OX=9606 GN=LTBP1 PE=1 SV=4
1164	Q14766	1359	1404	1358	1404	PF00683.18	TB	Family	2	45	45	56.6	1.6e-15	1	No_clan	sp|Q14766|LTBP1_HUMAN Latent-transforming growth factor beta-binding protein 1 OS=Homo sapiens OX=9606 GN=LTBP1 PE=1 SV=4
1165	Q14766	1424	1465	1424	1465	PF07645.16	EGF_CA	Domain	1	42	42	20.1	0.00057	1	CL0001	sp|Q14766|LTBP1_HUMAN Latent-transforming growth factor beta-binding protein 1 OS=Homo sapiens OX=9606 GN=LTBP1 PE=1 SV=4
1166	Q14766	1467	1506	1467	1506	PF07645.16	EGF_CA	Domain	1	42	42	23.9	3.5e-05	1	CL0001	sp|Q14766|LTBP1_HUMAN Latent-transforming growth factor beta-binding protein 1 OS=Homo sapiens OX=9606 GN=LTBP1 PE=1 SV=4
1167	Q14766	1536	1578	1535	1580	PF00683.18	TB	Family	2	43	45	54.2	9.2e-15	1	No_clan	sp|Q14766|LTBP1_HUMAN Latent-transforming growth factor beta-binding protein 1 OS=Homo sapiens OX=9606 GN=LTBP1 PE=1 SV=4
1168	Q14766	1662	1705	1662	1705	PF07645.16	EGF_CA	Domain	1	42	42	34	2.4e-08	1	CL0001	sp|Q14766|LTBP1_HUMAN Latent-transforming growth factor beta-binding protein 1 OS=Homo sapiens OX=9606 GN=LTBP1 PE=1 SV=4
1169	Q96KG7	197	216	197	216	PF12661.8	hEGF	Domain	1	22	22	23.5	6.2e-05	1	CL0001	sp|Q96KG7|MEG10_HUMAN Multiple epidermal growth factor-like domains protein 10 OS=Homo sapiens OX=9606 GN=MEGF10 PE=1 SV=1
1170	Q96KG7	240	259	240	259	PF12661.8	hEGF	Domain	1	22	22	18.3	0.0027	1	CL0001	sp|Q96KG7|MEG10_HUMAN Multiple epidermal growth factor-like domains protein 10 OS=Homo sapiens OX=9606 GN=MEGF10 PE=1 SV=1
1171	Q96KG7	281	324	281	326	PF00053.25	Laminin_EGF	Domain	1	47	49	17.4	0.0038	1	CL0001	sp|Q96KG7|MEG10_HUMAN Multiple epidermal growth factor-like domains protein 10 OS=Homo sapiens OX=9606 GN=MEGF10 PE=1 SV=1
1172	Q96KG7	368	413	367	415	PF00053.25	Laminin_EGF	Domain	1	47	49	19.5	0.00084	1	CL0001	sp|Q96KG7|MEG10_HUMAN Multiple epidermal growth factor-like domains protein 10 OS=Homo sapiens OX=9606 GN=MEGF10 PE=1 SV=1
1173	Q96KG7	415	434	415	434	PF12661.8	hEGF	Domain	1	22	22	18.2	0.0029	1	CL0001	sp|Q96KG7|MEG10_HUMAN Multiple epidermal growth factor-like domains protein 10 OS=Homo sapiens OX=9606 GN=MEGF10 PE=1 SV=1
1174	Q96KG7	501	520	501	520	PF12661.8	hEGF	Domain	1	22	22	15.8	0.016	1	CL0001	sp|Q96KG7|MEG10_HUMAN Multiple epidermal growth factor-like domains protein 10 OS=Homo sapiens OX=9606 GN=MEGF10 PE=1 SV=1
1175	Q96KG7	587	606	587	606	PF12661.8	hEGF	Domain	1	22	22	17	0.0069	1	CL0001	sp|Q96KG7|MEG10_HUMAN Multiple epidermal growth factor-like domains protein 10 OS=Homo sapiens OX=9606 GN=MEGF10 PE=1 SV=1
1176	Q96KG7	718	737	718	737	PF12661.8	hEGF	Domain	1	22	22	14.5	0.042	1	CL0001	sp|Q96KG7|MEG10_HUMAN Multiple epidermal growth factor-like domains protein 10 OS=Homo sapiens OX=9606 GN=MEGF10 PE=1 SV=1
1177	Q96KG7	759	797	759	804	PF00053.25	Laminin_EGF	Domain	1	42	49	16	0.01	1	CL0001	sp|Q96KG7|MEG10_HUMAN Multiple epidermal growth factor-like domains protein 10 OS=Homo sapiens OX=9606 GN=MEGF10 PE=1 SV=1
1178	Q96KG7	802	830	802	838	PF00053.25	Laminin_EGF	Domain	1	33	49	17.1	0.0046	1	CL0001	sp|Q96KG7|MEG10_HUMAN Multiple epidermal growth factor-like domains protein 10 OS=Homo sapiens OX=9606 GN=MEGF10 PE=1 SV=1
1179	O75443	164	250	163	251	PF06119.15	NIDO	Family	2	87	88	95.9	2.2e-27	1	No_clan	sp|O75443|TECTA_HUMAN Alpha-tectorin OS=Homo sapiens OX=9606 GN=TECTA PE=1 SV=3
1180	O75443	322	477	322	478	PF00094.26	VWD	Family	1	156	157	143.4	6.9e-42	1	No_clan	sp|O75443|TECTA_HUMAN Alpha-tectorin OS=Homo sapiens OX=9606 GN=TECTA PE=1 SV=3
1181	O75443	523	591	523	591	PF08742.12	C8	Domain	1	69	69	66.4	2.2e-18	1	No_clan	sp|O75443|TECTA_HUMAN Alpha-tectorin OS=Homo sapiens OX=9606 GN=TECTA PE=1 SV=3
1182	O75443	597	650	597	650	PF01826.18	TIL	Domain	1	55	55	43.8	2.2e-11	1	No_clan	sp|O75443|TECTA_HUMAN Alpha-tectorin OS=Homo sapiens OX=9606 GN=TECTA PE=1 SV=3
1183	O75443	652	705	651	706	PF12714.8	TILa	Domain	2	54	55	33.7	2.5e-08	1	CL0451	sp|O75443|TECTA_HUMAN Alpha-tectorin OS=Homo sapiens OX=9606 GN=TECTA PE=1 SV=3
1184	O75443	713	866	713	866	PF00094.26	VWD	Family	1	157	157	102.3	3.1e-29	1	No_clan	sp|O75443|TECTA_HUMAN Alpha-tectorin OS=Homo sapiens OX=9606 GN=TECTA PE=1 SV=3
1185	O75443	912	980	911	980	PF08742.12	C8	Domain	2	69	69	61.2	9.4e-17	1	No_clan	sp|O75443|TECTA_HUMAN Alpha-tectorin OS=Homo sapiens OX=9606 GN=TECTA PE=1 SV=3
1186	O75443	984	1036	984	1036	PF01826.18	TIL	Domain	1	55	55	32.7	6.8e-08	1	No_clan	sp|O75443|TECTA_HUMAN Alpha-tectorin OS=Homo sapiens OX=9606 GN=TECTA PE=1 SV=3
1187	O75443	1100	1257	1100	1258	PF00094.26	VWD	Family	1	156	157	123.5	9.4e-36	1	No_clan	sp|O75443|TECTA_HUMAN Alpha-tectorin OS=Homo sapiens OX=9606 GN=TECTA PE=1 SV=3
1188	O75443	1301	1368	1300	1368	PF08742.12	C8	Domain	2	69	69	62	5.3e-17	1	No_clan	sp|O75443|TECTA_HUMAN Alpha-tectorin OS=Homo sapiens OX=9606 GN=TECTA PE=1 SV=3
1189	O75443	1372	1425	1372	1425	PF01826.18	TIL	Domain	1	55	55	43.3	3.2e-11	1	No_clan	sp|O75443|TECTA_HUMAN Alpha-tectorin OS=Homo sapiens OX=9606 GN=TECTA PE=1 SV=3
1190	O75443	1426	1479	1426	1480	PF12714.8	TILa	Domain	1	54	55	41.5	9.8e-11	1	CL0451	sp|O75443|TECTA_HUMAN Alpha-tectorin OS=Homo sapiens OX=9606 GN=TECTA PE=1 SV=3
1191	O75443	1487	1638	1487	1639	PF00094.26	VWD	Family	1	156	157	113.1	1.5e-32	1	No_clan	sp|O75443|TECTA_HUMAN Alpha-tectorin OS=Homo sapiens OX=9606 GN=TECTA PE=1 SV=3
1192	O75443	1690	1757	1690	1757	PF08742.12	C8	Domain	1	69	69	43.8	2.6e-11	1	No_clan	sp|O75443|TECTA_HUMAN Alpha-tectorin OS=Homo sapiens OX=9606 GN=TECTA PE=1 SV=3
1193	O75443	1806	2056	1806	2057	PF00100.24	Zona_pellucida	Family	1	253	254	158.7	2.3e-46	1	CL0159	sp|O75443|TECTA_HUMAN Alpha-tectorin OS=Homo sapiens OX=9606 GN=TECTA PE=1 SV=3
1194	A6BM72	191	210	191	210	PF12661.8	hEGF	Domain	1	22	22	16.1	0.014	1	CL0001	sp|A6BM72|MEG11_HUMAN Multiple epidermal growth factor-like domains protein 11 OS=Homo sapiens OX=9606 GN=MEGF11 PE=1 SV=3
1195	A6BM72	234	253	234	253	PF12661.8	hEGF	Domain	1	22	22	20.7	0.00047	1	CL0001	sp|A6BM72|MEG11_HUMAN Multiple epidermal growth factor-like domains protein 11 OS=Homo sapiens OX=9606 GN=MEGF11 PE=1 SV=3
1196	A6BM72	275	320	275	320	PF00053.25	Laminin_EGF	Domain	1	49	49	16.5	0.0071	1	CL0001	sp|A6BM72|MEG11_HUMAN Multiple epidermal growth factor-like domains protein 11 OS=Homo sapiens OX=9606 GN=MEGF11 PE=1 SV=3
1197	A6BM72	362	409	361	409	PF00053.25	Laminin_EGF	Domain	1	49	49	19.9	0.00059	1	CL0001	sp|A6BM72|MEG11_HUMAN Multiple epidermal growth factor-like domains protein 11 OS=Homo sapiens OX=9606 GN=MEGF11 PE=1 SV=3
1198	A6BM72	452	471	452	471	PF12661.8	hEGF	Domain	1	22	22	17.6	0.0047	1	CL0001	sp|A6BM72|MEG11_HUMAN Multiple epidermal growth factor-like domains protein 11 OS=Homo sapiens OX=9606 GN=MEGF11 PE=1 SV=3
1199	A6BM72	579	619	579	622	PF00053.25	Laminin_EGF	Domain	1	46	49	17.8	0.0028	1	CL0001	sp|A6BM72|MEG11_HUMAN Multiple epidermal growth factor-like domains protein 11 OS=Homo sapiens OX=9606 GN=MEGF11 PE=1 SV=3
1200	A6BM72	622	661	618	666	PF00053.25	Laminin_EGF	Domain	3	41	49	13.6	0.057	1	CL0001	sp|A6BM72|MEG11_HUMAN Multiple epidermal growth factor-like domains protein 11 OS=Homo sapiens OX=9606 GN=MEGF11 PE=1 SV=3
1201	A6BM72	667	703	667	708	PF00053.25	Laminin_EGF	Domain	1	40	49	17.9	0.0025	1	CL0001	sp|A6BM72|MEG11_HUMAN Multiple epidermal growth factor-like domains protein 11 OS=Homo sapiens OX=9606 GN=MEGF11 PE=1 SV=3
1202	A6BM72	712	731	712	731	PF12661.8	hEGF	Domain	1	22	22	13.8	0.07	1	CL0001	sp|A6BM72|MEG11_HUMAN Multiple epidermal growth factor-like domains protein 11 OS=Homo sapiens OX=9606 GN=MEGF11 PE=1 SV=3
1203	A6BM72	753	792	748	798	PF00053.25	Laminin_EGF	Domain	1	43	49	14.2	0.036	1	CL0001	sp|A6BM72|MEG11_HUMAN Multiple epidermal growth factor-like domains protein 11 OS=Homo sapiens OX=9606 GN=MEGF11 PE=1 SV=3
1204	A6BM72	796	824	796	832	PF00053.25	Laminin_EGF	Domain	1	33	49	18.6	0.0016	1	CL0001	sp|A6BM72|MEG11_HUMAN Multiple epidermal growth factor-like domains protein 11 OS=Homo sapiens OX=9606 GN=MEGF11 PE=1 SV=3
1205	Q7Z407	65	170	65	170	PF00431.21	CUB	Domain	1	110	110	72.6	3e-20	1	CL0164	sp|Q7Z407|CSMD3_HUMAN CUB and sushi domain-containing protein 3 OS=Homo sapiens OX=9606 GN=CSMD3 PE=2 SV=3
1206	Q7Z407	178	235	178	235	PF00084.21	Sushi	Domain	1	56	56	23.8	5e-05	1	CL0001	sp|Q7Z407|CSMD3_HUMAN CUB and sushi domain-containing protein 3 OS=Homo sapiens OX=9606 GN=CSMD3 PE=2 SV=3
1207	Q7Z407	241	342	241	342	PF00431.21	CUB	Domain	1	110	110	74.4	8.2e-21	1	CL0164	sp|Q7Z407|CSMD3_HUMAN CUB and sushi domain-containing protein 3 OS=Homo sapiens OX=9606 GN=CSMD3 PE=2 SV=3
1208	Q7Z407	486	543	486	543	PF00084.21	Sushi	Domain	1	56	56	30.5	4e-07	1	CL0001	sp|Q7Z407|CSMD3_HUMAN CUB and sushi domain-containing protein 3 OS=Homo sapiens OX=9606 GN=CSMD3 PE=2 SV=3
1209	Q7Z407	548	656	548	656	PF00431.21	CUB	Domain	1	110	110	74.3	8.7e-21	1	CL0164	sp|Q7Z407|CSMD3_HUMAN CUB and sushi domain-containing protein 3 OS=Homo sapiens OX=9606 GN=CSMD3 PE=2 SV=3
1210	Q7Z407	664	717	664	717	PF00084.21	Sushi	Domain	1	56	56	26.2	9.1e-06	1	CL0001	sp|Q7Z407|CSMD3_HUMAN CUB and sushi domain-containing protein 3 OS=Homo sapiens OX=9606 GN=CSMD3 PE=2 SV=3
1211	Q7Z407	721	826	721	826	PF00431.21	CUB	Domain	1	110	110	84.4	6.6e-24	1	CL0164	sp|Q7Z407|CSMD3_HUMAN CUB and sushi domain-containing protein 3 OS=Homo sapiens OX=9606 GN=CSMD3 PE=2 SV=3
1212	Q7Z407	834	891	834	891	PF00084.21	Sushi	Domain	1	56	56	21.1	0.00036	1	CL0001	sp|Q7Z407|CSMD3_HUMAN CUB and sushi domain-containing protein 3 OS=Homo sapiens OX=9606 GN=CSMD3 PE=2 SV=3
1213	Q7Z407	895	1000	895	1000	PF00431.21	CUB	Domain	1	110	110	88.1	4.6e-25	1	CL0164	sp|Q7Z407|CSMD3_HUMAN CUB and sushi domain-containing protein 3 OS=Homo sapiens OX=9606 GN=CSMD3 PE=2 SV=3
1214	Q7Z407	1010	1063	1010	1063	PF00084.21	Sushi	Domain	1	56	56	29.7	7.2e-07	1	CL0001	sp|Q7Z407|CSMD3_HUMAN CUB and sushi domain-containing protein 3 OS=Homo sapiens OX=9606 GN=CSMD3 PE=2 SV=3
1215	Q7Z407	1067	1174	1067	1174	PF00431.21	CUB	Domain	1	110	110	60.3	2e-16	1	CL0164	sp|Q7Z407|CSMD3_HUMAN CUB and sushi domain-containing protein 3 OS=Homo sapiens OX=9606 GN=CSMD3 PE=2 SV=3
1216	Q7Z407	1182	1237	1182	1237	PF00084.21	Sushi	Domain	1	56	56	27	5.1e-06	1	CL0001	sp|Q7Z407|CSMD3_HUMAN CUB and sushi domain-containing protein 3 OS=Homo sapiens OX=9606 GN=CSMD3 PE=2 SV=3
1217	Q7Z407	1241	1346	1241	1346	PF00431.21	CUB	Domain	1	110	110	79.7	1.9e-22	1	CL0164	sp|Q7Z407|CSMD3_HUMAN CUB and sushi domain-containing protein 3 OS=Homo sapiens OX=9606 GN=CSMD3 PE=2 SV=3
1218	Q7Z407	1354	1410	1354	1410	PF00084.21	Sushi	Domain	1	56	56	21.4	0.00029	1	CL0001	sp|Q7Z407|CSMD3_HUMAN CUB and sushi domain-containing protein 3 OS=Homo sapiens OX=9606 GN=CSMD3 PE=2 SV=3
1219	Q7Z407	1414	1520	1414	1520	PF00431.21	CUB	Domain	1	110	110	75.8	3.1e-21	1	CL0164	sp|Q7Z407|CSMD3_HUMAN CUB and sushi domain-containing protein 3 OS=Homo sapiens OX=9606 GN=CSMD3 PE=2 SV=3
1220	Q7Z407	1528	1584	1528	1584	PF00084.21	Sushi	Domain	1	56	56	32.8	7.7e-08	1	CL0001	sp|Q7Z407|CSMD3_HUMAN CUB and sushi domain-containing protein 3 OS=Homo sapiens OX=9606 GN=CSMD3 PE=2 SV=3
1221	Q7Z407	1588	1693	1588	1693	PF00431.21	CUB	Domain	1	110	110	90.6	8e-26	1	CL0164	sp|Q7Z407|CSMD3_HUMAN CUB and sushi domain-containing protein 3 OS=Homo sapiens OX=9606 GN=CSMD3 PE=2 SV=3
1222	Q7Z407	1701	1758	1701	1758	PF00084.21	Sushi	Domain	1	56	56	24.5	3.1e-05	1	CL0001	sp|Q7Z407|CSMD3_HUMAN CUB and sushi domain-containing protein 3 OS=Homo sapiens OX=9606 GN=CSMD3 PE=2 SV=3
1223	Q7Z407	1762	1867	1762	1867	PF00431.21	CUB	Domain	1	110	110	59.6	3.4e-16	1	CL0164	sp|Q7Z407|CSMD3_HUMAN CUB and sushi domain-containing protein 3 OS=Homo sapiens OX=9606 GN=CSMD3 PE=2 SV=3
1224	Q7Z407	1878	1935	1878	1935	PF00084.21	Sushi	Domain	1	56	56	22.5	0.00012	1	CL0001	sp|Q7Z407|CSMD3_HUMAN CUB and sushi domain-containing protein 3 OS=Homo sapiens OX=9606 GN=CSMD3 PE=2 SV=3
1225	Q7Z407	1939	2044	1939	2044	PF00431.21	CUB	Domain	1	110	110	85.4	3.3e-24	1	CL0164	sp|Q7Z407|CSMD3_HUMAN CUB and sushi domain-containing protein 3 OS=Homo sapiens OX=9606 GN=CSMD3 PE=2 SV=3
1226	Q7Z407	2052	2107	2052	2107	PF00084.21	Sushi	Domain	1	56	56	34.3	2.8e-08	1	CL0001	sp|Q7Z407|CSMD3_HUMAN CUB and sushi domain-containing protein 3 OS=Homo sapiens OX=9606 GN=CSMD3 PE=2 SV=3
1227	Q7Z407	2111	2216	2111	2216	PF00431.21	CUB	Domain	1	110	110	81.4	5.8e-23	1	CL0164	sp|Q7Z407|CSMD3_HUMAN CUB and sushi domain-containing protein 3 OS=Homo sapiens OX=9606 GN=CSMD3 PE=2 SV=3
1228	Q7Z407	2224	2279	2224	2279	PF00084.21	Sushi	Domain	1	56	56	34.9	1.7e-08	1	CL0001	sp|Q7Z407|CSMD3_HUMAN CUB and sushi domain-containing protein 3 OS=Homo sapiens OX=9606 GN=CSMD3 PE=2 SV=3
1229	Q7Z407	2283	2379	2283	2387	PF00431.21	CUB	Domain	1	101	110	79.2	2.6e-22	1	CL0164	sp|Q7Z407|CSMD3_HUMAN CUB and sushi domain-containing protein 3 OS=Homo sapiens OX=9606 GN=CSMD3 PE=2 SV=3
1230	Q7Z407	2395	2452	2395	2452	PF00084.21	Sushi	Domain	1	56	56	37.5	2.7e-09	1	CL0001	sp|Q7Z407|CSMD3_HUMAN CUB and sushi domain-containing protein 3 OS=Homo sapiens OX=9606 GN=CSMD3 PE=2 SV=3
1231	Q7Z407	2464	2564	2456	2564	PF00431.21	CUB	Domain	7	110	110	61.6	7.9e-17	1	CL0164	sp|Q7Z407|CSMD3_HUMAN CUB and sushi domain-containing protein 3 OS=Homo sapiens OX=9606 GN=CSMD3 PE=2 SV=3
1232	Q7Z407	2569	2627	2569	2627	PF00084.21	Sushi	Domain	1	56	56	25.6	1.4e-05	1	CL0001	sp|Q7Z407|CSMD3_HUMAN CUB and sushi domain-containing protein 3 OS=Homo sapiens OX=9606 GN=CSMD3 PE=2 SV=3
1233	Q7Z407	2632	2689	2632	2689	PF00084.21	Sushi	Domain	1	56	56	39.4	7e-10	1	CL0001	sp|Q7Z407|CSMD3_HUMAN CUB and sushi domain-containing protein 3 OS=Homo sapiens OX=9606 GN=CSMD3 PE=2 SV=3
1234	Q7Z407	2701	2748	2694	2754	PF00084.21	Sushi	Domain	6	52	56	29.8	7e-07	1	CL0001	sp|Q7Z407|CSMD3_HUMAN CUB and sushi domain-containing protein 3 OS=Homo sapiens OX=9606 GN=CSMD3 PE=2 SV=3
1235	Q7Z407	2759	2812	2759	2812	PF00084.21	Sushi	Domain	1	56	56	30.9	3.1e-07	1	CL0001	sp|Q7Z407|CSMD3_HUMAN CUB and sushi domain-containing protein 3 OS=Homo sapiens OX=9606 GN=CSMD3 PE=2 SV=3
1236	Q7Z407	2817	2870	2817	2870	PF00084.21	Sushi	Domain	1	56	56	45.2	1.1e-11	1	CL0001	sp|Q7Z407|CSMD3_HUMAN CUB and sushi domain-containing protein 3 OS=Homo sapiens OX=9606 GN=CSMD3 PE=2 SV=3
1237	Q7Z407	2875	2928	2875	2928	PF00084.21	Sushi	Domain	1	56	56	34.9	1.8e-08	1	CL0001	sp|Q7Z407|CSMD3_HUMAN CUB and sushi domain-containing protein 3 OS=Homo sapiens OX=9606 GN=CSMD3 PE=2 SV=3
1238	Q7Z407	2933	2990	2933	2990	PF00084.21	Sushi	Domain	1	56	56	41.3	1.7e-10	1	CL0001	sp|Q7Z407|CSMD3_HUMAN CUB and sushi domain-containing protein 3 OS=Homo sapiens OX=9606 GN=CSMD3 PE=2 SV=3
1239	Q7Z407	2995	3048	2995	3048	PF00084.21	Sushi	Domain	1	56	56	35.5	1.1e-08	1	CL0001	sp|Q7Z407|CSMD3_HUMAN CUB and sushi domain-containing protein 3 OS=Homo sapiens OX=9606 GN=CSMD3 PE=2 SV=3
1240	Q7Z407	3056	3109	3056	3109	PF00084.21	Sushi	Domain	1	56	56	38.4	1.4e-09	1	CL0001	sp|Q7Z407|CSMD3_HUMAN CUB and sushi domain-containing protein 3 OS=Homo sapiens OX=9606 GN=CSMD3 PE=2 SV=3
1241	Q7Z407	3114	3168	3114	3168	PF00084.21	Sushi	Domain	1	56	56	37.8	2.1e-09	1	CL0001	sp|Q7Z407|CSMD3_HUMAN CUB and sushi domain-containing protein 3 OS=Homo sapiens OX=9606 GN=CSMD3 PE=2 SV=3
1242	Q7Z407	3173	3228	3173	3228	PF00084.21	Sushi	Domain	1	56	56	38.9	1e-09	1	CL0001	sp|Q7Z407|CSMD3_HUMAN CUB and sushi domain-containing protein 3 OS=Homo sapiens OX=9606 GN=CSMD3 PE=2 SV=3
1243	Q7Z407	3233	3286	3233	3286	PF00084.21	Sushi	Domain	1	56	56	42.5	7.1e-11	1	CL0001	sp|Q7Z407|CSMD3_HUMAN CUB and sushi domain-containing protein 3 OS=Homo sapiens OX=9606 GN=CSMD3 PE=2 SV=3
1244	Q7Z407	3291	3344	3291	3344	PF00084.21	Sushi	Domain	1	56	56	32.4	1.1e-07	1	CL0001	sp|Q7Z407|CSMD3_HUMAN CUB and sushi domain-containing protein 3 OS=Homo sapiens OX=9606 GN=CSMD3 PE=2 SV=3
1245	Q7Z407	3352	3406	3352	3406	PF00084.21	Sushi	Domain	1	56	56	37.9	2e-09	1	CL0001	sp|Q7Z407|CSMD3_HUMAN CUB and sushi domain-containing protein 3 OS=Homo sapiens OX=9606 GN=CSMD3 PE=2 SV=3
1246	Q7Z407	3411	3466	3411	3466	PF00084.21	Sushi	Domain	1	56	56	26.3	8.1e-06	1	CL0001	sp|Q7Z407|CSMD3_HUMAN CUB and sushi domain-containing protein 3 OS=Homo sapiens OX=9606 GN=CSMD3 PE=2 SV=3
1247	O00468	31	146	31	146	PF03146.16	NtA	Domain	1	109	109	144.1	1.2e-42	1	CL0353	sp|O00468|AGRIN_HUMAN Agrin OS=Homo sapiens OX=9606 GN=AGRN PE=1 SV=6
1248	O00468	199	242	197	242	PF07648.16	Kazal_2	Domain	3	49	49	41.7	9.7e-11	1	CL0005	sp|O00468|AGRIN_HUMAN Agrin OS=Homo sapiens OX=9606 GN=AGRN PE=1 SV=6
1249	O00468	272	317	270	317	PF07648.16	Kazal_2	Domain	2	49	49	27.8	2.1e-06	1	CL0005	sp|O00468|AGRIN_HUMAN Agrin OS=Homo sapiens OX=9606 GN=AGRN PE=1 SV=6
1250	O00468	346	389	335	389	PF00050.22	Kazal_1	Domain	5	49	49	44.1	1.6e-11	1	CL0005	sp|O00468|AGRIN_HUMAN Agrin OS=Homo sapiens OX=9606 GN=AGRN PE=1 SV=6
1251	O00468	413	461	411	461	PF07648.16	Kazal_2	Domain	3	49	49	25.2	1.3e-05	1	CL0005	sp|O00468|AGRIN_HUMAN Agrin OS=Homo sapiens OX=9606 GN=AGRN PE=1 SV=6
1252	O00468	489	534	489	534	PF07648.16	Kazal_2	Domain	1	49	49	44.2	1.6e-11	1	CL0005	sp|O00468|AGRIN_HUMAN Agrin OS=Homo sapiens OX=9606 GN=AGRN PE=1 SV=6
1253	O00468	555	599	552	599	PF07648.16	Kazal_2	Domain	2	49	49	36.7	3.4e-09	1	CL0005	sp|O00468|AGRIN_HUMAN Agrin OS=Homo sapiens OX=9606 GN=AGRN PE=1 SV=6
1254	O00468	619	664	616	669	PF07648.16	Kazal_2	Domain	2	49	49	35.2	1e-08	1	CL0005	sp|O00468|AGRIN_HUMAN Agrin OS=Homo sapiens OX=9606 GN=AGRN PE=1 SV=6
1255	O00468	705	750	704	750	PF07648.16	Kazal_2	Domain	2	49	49	43	3.6e-11	1	CL0005	sp|O00468|AGRIN_HUMAN Agrin OS=Homo sapiens OX=9606 GN=AGRN PE=1 SV=6
1256	O00468	793	835	793	844	PF00053.25	Laminin_EGF	Domain	1	43	49	49.4	3.7e-13	1	CL0001	sp|O00468|AGRIN_HUMAN Agrin OS=Homo sapiens OX=9606 GN=AGRN PE=1 SV=6
1257	O00468	847	885	847	901	PF00053.25	Laminin_EGF	Domain	1	39	49	36.7	3.3e-09	1	CL0001	sp|O00468|AGRIN_HUMAN Agrin OS=Homo sapiens OX=9606 GN=AGRN PE=1 SV=6
1258	O00468	927	969	923	969	PF07648.16	Kazal_2	Domain	5	49	49	38.6	8.4e-10	1	CL0005	sp|O00468|AGRIN_HUMAN Agrin OS=Homo sapiens OX=9606 GN=AGRN PE=1 SV=6
1259	O00468	1134	1228	1132	1237	PF01390.21	SEA	Family	3	96	106	55.9	3.9e-15	1	No_clan	sp|O00468|AGRIN_HUMAN Agrin OS=Homo sapiens OX=9606 GN=AGRN PE=1 SV=6
1260	O00468	1333	1363	1333	1365	PF00008.28	EGF	Domain	1	30	32	24.9	1.9e-05	1	CL0001	sp|O00468|AGRIN_HUMAN Agrin OS=Homo sapiens OX=9606 GN=AGRN PE=1 SV=6
1261	O00468	1400	1530	1400	1531	PF00054.24	Laminin_G_1	Domain	1	130	131	125	2.3e-36	1	CL0004	sp|O00468|AGRIN_HUMAN Agrin OS=Homo sapiens OX=9606 GN=AGRN PE=1 SV=6
1262	O00468	1553	1583	1553	1584	PF00008.28	EGF	Domain	1	31	32	21.5	0.00021	1	CL0001	sp|O00468|AGRIN_HUMAN Agrin OS=Homo sapiens OX=9606 GN=AGRN PE=1 SV=6
1263	O00468	1668	1802	1668	1803	PF00054.24	Laminin_G_1	Domain	1	130	131	113.3	8.7e-33	1	CL0004	sp|O00468|AGRIN_HUMAN Agrin OS=Homo sapiens OX=9606 GN=AGRN PE=1 SV=6
1264	O00468	1921	2051	1920	2051	PF00054.24	Laminin_G_1	Domain	2	131	131	123	9.2e-36	1	CL0004	sp|O00468|AGRIN_HUMAN Agrin OS=Homo sapiens OX=9606 GN=AGRN PE=1 SV=6
1265	Q96PZ7	32	137	32	137	PF00431.21	CUB	Domain	1	110	110	69.6	2.6e-19	1	CL0164	sp|Q96PZ7|CSMD1_HUMAN CUB and sushi domain-containing protein 1 OS=Homo sapiens OX=9606 GN=CSMD1 PE=1 SV=3
1266	Q96PZ7	145	202	145	202	PF00084.21	Sushi	Domain	1	56	56	28.4	1.8e-06	1	CL0001	sp|Q96PZ7|CSMD1_HUMAN CUB and sushi domain-containing protein 1 OS=Homo sapiens OX=9606 GN=CSMD1 PE=1 SV=3
1267	Q96PZ7	208	309	208	309	PF00431.21	CUB	Domain	1	110	110	72	4.7e-20	1	CL0164	sp|Q96PZ7|CSMD1_HUMAN CUB and sushi domain-containing protein 1 OS=Homo sapiens OX=9606 GN=CSMD1 PE=1 SV=3
1268	Q96PZ7	349	406	349	406	PF00084.21	Sushi	Domain	1	56	56	29.6	7.7e-07	1	CL0001	sp|Q96PZ7|CSMD1_HUMAN CUB and sushi domain-containing protein 1 OS=Homo sapiens OX=9606 GN=CSMD1 PE=1 SV=3
1269	Q96PZ7	411	519	411	519	PF00431.21	CUB	Domain	1	110	110	73.2	2e-20	1	CL0164	sp|Q96PZ7|CSMD1_HUMAN CUB and sushi domain-containing protein 1 OS=Homo sapiens OX=9606 GN=CSMD1 PE=1 SV=3
1270	Q96PZ7	527	580	527	580	PF00084.21	Sushi	Domain	1	56	56	35.3	1.3e-08	1	CL0001	sp|Q96PZ7|CSMD1_HUMAN CUB and sushi domain-containing protein 1 OS=Homo sapiens OX=9606 GN=CSMD1 PE=1 SV=3
1271	Q96PZ7	584	689	584	689	PF00431.21	CUB	Domain	1	110	110	84.7	5.2e-24	1	CL0164	sp|Q96PZ7|CSMD1_HUMAN CUB and sushi domain-containing protein 1 OS=Homo sapiens OX=9606 GN=CSMD1 PE=1 SV=3
1272	Q96PZ7	706	754	697	754	PF00084.21	Sushi	Domain	14	56	56	28.4	1.9e-06	1	CL0001	sp|Q96PZ7|CSMD1_HUMAN CUB and sushi domain-containing protein 1 OS=Homo sapiens OX=9606 GN=CSMD1 PE=1 SV=3
1273	Q96PZ7	758	863	758	863	PF00431.21	CUB	Domain	1	110	110	88.6	3.2e-25	1	CL0164	sp|Q96PZ7|CSMD1_HUMAN CUB and sushi domain-containing protein 1 OS=Homo sapiens OX=9606 GN=CSMD1 PE=1 SV=3
1274	Q96PZ7	873	926	873	926	PF00084.21	Sushi	Domain	1	56	56	31.8	1.6e-07	1	CL0001	sp|Q96PZ7|CSMD1_HUMAN CUB and sushi domain-containing protein 1 OS=Homo sapiens OX=9606 GN=CSMD1 PE=1 SV=3
1275	Q96PZ7	930	1037	930	1037	PF00431.21	CUB	Domain	1	110	110	56.1	4.1e-15	1	CL0164	sp|Q96PZ7|CSMD1_HUMAN CUB and sushi domain-containing protein 1 OS=Homo sapiens OX=9606 GN=CSMD1 PE=1 SV=3
1276	Q96PZ7	1059	1100	1045	1100	PF00084.21	Sushi	Domain	17	56	56	21.2	0.00033	1	CL0001	sp|Q96PZ7|CSMD1_HUMAN CUB and sushi domain-containing protein 1 OS=Homo sapiens OX=9606 GN=CSMD1 PE=1 SV=3
1277	Q96PZ7	1104	1209	1104	1209	PF00431.21	CUB	Domain	1	110	110	67.9	9.1e-19	1	CL0164	sp|Q96PZ7|CSMD1_HUMAN CUB and sushi domain-containing protein 1 OS=Homo sapiens OX=9606 GN=CSMD1 PE=1 SV=3
1278	Q96PZ7	1217	1273	1217	1273	PF00084.21	Sushi	Domain	1	56	56	29	1.2e-06	1	CL0001	sp|Q96PZ7|CSMD1_HUMAN CUB and sushi domain-containing protein 1 OS=Homo sapiens OX=9606 GN=CSMD1 PE=1 SV=3
1279	Q96PZ7	1277	1383	1277	1383	PF00431.21	CUB	Domain	1	110	110	78.4	4.9e-22	1	CL0164	sp|Q96PZ7|CSMD1_HUMAN CUB and sushi domain-containing protein 1 OS=Homo sapiens OX=9606 GN=CSMD1 PE=1 SV=3
1280	Q96PZ7	1391	1447	1391	1447	PF00084.21	Sushi	Domain	1	56	56	37.1	3.5e-09	1	CL0001	sp|Q96PZ7|CSMD1_HUMAN CUB and sushi domain-containing protein 1 OS=Homo sapiens OX=9606 GN=CSMD1 PE=1 SV=3
1281	Q96PZ7	1451	1556	1451	1556	PF00431.21	CUB	Domain	1	110	110	94.5	4.9e-27	1	CL0164	sp|Q96PZ7|CSMD1_HUMAN CUB and sushi domain-containing protein 1 OS=Homo sapiens OX=9606 GN=CSMD1 PE=1 SV=3
1282	Q96PZ7	1564	1621	1564	1621	PF00084.21	Sushi	Domain	1	56	56	23.9	4.7e-05	1	CL0001	sp|Q96PZ7|CSMD1_HUMAN CUB and sushi domain-containing protein 1 OS=Homo sapiens OX=9606 GN=CSMD1 PE=1 SV=3
1283	Q96PZ7	1625	1730	1625	1730	PF00431.21	CUB	Domain	1	110	110	53.4	2.7e-14	1	CL0164	sp|Q96PZ7|CSMD1_HUMAN CUB and sushi domain-containing protein 1 OS=Homo sapiens OX=9606 GN=CSMD1 PE=1 SV=3
1284	Q96PZ7	1741	1798	1741	1798	PF00084.21	Sushi	Domain	1	56	56	24.3	3.7e-05	1	CL0001	sp|Q96PZ7|CSMD1_HUMAN CUB and sushi domain-containing protein 1 OS=Homo sapiens OX=9606 GN=CSMD1 PE=1 SV=3
1285	Q96PZ7	1802	1907	1802	1907	PF00431.21	CUB	Domain	1	110	110	81.2	6.4e-23	1	CL0164	sp|Q96PZ7|CSMD1_HUMAN CUB and sushi domain-containing protein 1 OS=Homo sapiens OX=9606 GN=CSMD1 PE=1 SV=3
1286	Q96PZ7	1915	1970	1915	1970	PF00084.21	Sushi	Domain	1	56	56	29.3	9.6e-07	1	CL0001	sp|Q96PZ7|CSMD1_HUMAN CUB and sushi domain-containing protein 1 OS=Homo sapiens OX=9606 GN=CSMD1 PE=1 SV=3
1287	Q96PZ7	1974	2079	1974	2079	PF00431.21	CUB	Domain	1	110	110	77.1	1.2e-21	1	CL0164	sp|Q96PZ7|CSMD1_HUMAN CUB and sushi domain-containing protein 1 OS=Homo sapiens OX=9606 GN=CSMD1 PE=1 SV=3
1288	Q96PZ7	2087	2142	2087	2142	PF00084.21	Sushi	Domain	1	56	56	38.2	1.6e-09	1	CL0001	sp|Q96PZ7|CSMD1_HUMAN CUB and sushi domain-containing protein 1 OS=Homo sapiens OX=9606 GN=CSMD1 PE=1 SV=3
1289	Q96PZ7	2146	2241	2146	2249	PF00431.21	CUB	Domain	1	100	110	73.5	1.6e-20	1	CL0164	sp|Q96PZ7|CSMD1_HUMAN CUB and sushi domain-containing protein 1 OS=Homo sapiens OX=9606 GN=CSMD1 PE=1 SV=3
1290	Q96PZ7	2258	2315	2258	2315	PF00084.21	Sushi	Domain	1	56	56	36.7	4.6e-09	1	CL0001	sp|Q96PZ7|CSMD1_HUMAN CUB and sushi domain-containing protein 1 OS=Homo sapiens OX=9606 GN=CSMD1 PE=1 SV=3
1291	Q96PZ7	2325	2427	2319	2427	PF00431.21	CUB	Domain	5	110	110	67.2	1.5e-18	1	CL0164	sp|Q96PZ7|CSMD1_HUMAN CUB and sushi domain-containing protein 1 OS=Homo sapiens OX=9606 GN=CSMD1 PE=1 SV=3
1292	Q96PZ7	2448	2490	2432	2490	PF00084.21	Sushi	Domain	18	56	56	25.7	1.3e-05	1	CL0001	sp|Q96PZ7|CSMD1_HUMAN CUB and sushi domain-containing protein 1 OS=Homo sapiens OX=9606 GN=CSMD1 PE=1 SV=3
1293	Q96PZ7	2495	2552	2495	2552	PF00084.21	Sushi	Domain	1	56	56	41.1	2e-10	1	CL0001	sp|Q96PZ7|CSMD1_HUMAN CUB and sushi domain-containing protein 1 OS=Homo sapiens OX=9606 GN=CSMD1 PE=1 SV=3
1294	Q96PZ7	2579	2611	2571	2617	PF00084.21	Sushi	Domain	20	52	56	27.2	4.3e-06	1	CL0001	sp|Q96PZ7|CSMD1_HUMAN CUB and sushi domain-containing protein 1 OS=Homo sapiens OX=9606 GN=CSMD1 PE=1 SV=3
1295	Q96PZ7	2636	2675	2622	2675	PF00084.21	Sushi	Domain	17	56	56	28.9	1.3e-06	1	CL0001	sp|Q96PZ7|CSMD1_HUMAN CUB and sushi domain-containing protein 1 OS=Homo sapiens OX=9606 GN=CSMD1 PE=1 SV=3
1296	Q96PZ7	2680	2733	2680	2733	PF00084.21	Sushi	Domain	1	56	56	46.6	3.7e-12	1	CL0001	sp|Q96PZ7|CSMD1_HUMAN CUB and sushi domain-containing protein 1 OS=Homo sapiens OX=9606 GN=CSMD1 PE=1 SV=3
1297	Q96PZ7	2738	2791	2738	2791	PF00084.21	Sushi	Domain	1	56	56	38	1.9e-09	1	CL0001	sp|Q96PZ7|CSMD1_HUMAN CUB and sushi domain-containing protein 1 OS=Homo sapiens OX=9606 GN=CSMD1 PE=1 SV=3
1298	Q96PZ7	2796	2854	2796	2854	PF00084.21	Sushi	Domain	1	56	56	34.6	2.1e-08	1	CL0001	sp|Q96PZ7|CSMD1_HUMAN CUB and sushi domain-containing protein 1 OS=Homo sapiens OX=9606 GN=CSMD1 PE=1 SV=3
1299	Q96PZ7	2859	2912	2859	2912	PF00084.21	Sushi	Domain	1	56	56	32.9	7.3e-08	1	CL0001	sp|Q96PZ7|CSMD1_HUMAN CUB and sushi domain-containing protein 1 OS=Homo sapiens OX=9606 GN=CSMD1 PE=1 SV=3
1300	Q96PZ7	2920	2973	2920	2973	PF00084.21	Sushi	Domain	1	56	56	34.4	2.5e-08	1	CL0001	sp|Q96PZ7|CSMD1_HUMAN CUB and sushi domain-containing protein 1 OS=Homo sapiens OX=9606 GN=CSMD1 PE=1 SV=3
1301	Q96PZ7	2978	3032	2978	3032	PF00084.21	Sushi	Domain	1	56	56	35.4	1.2e-08	1	CL0001	sp|Q96PZ7|CSMD1_HUMAN CUB and sushi domain-containing protein 1 OS=Homo sapiens OX=9606 GN=CSMD1 PE=1 SV=3
1302	Q96PZ7	3037	3092	3037	3092	PF00084.21	Sushi	Domain	1	56	56	41.6	1.4e-10	1	CL0001	sp|Q96PZ7|CSMD1_HUMAN CUB and sushi domain-containing protein 1 OS=Homo sapiens OX=9606 GN=CSMD1 PE=1 SV=3
1303	Q96PZ7	3097	3150	3097	3150	PF00084.21	Sushi	Domain	1	56	56	40.9	2.3e-10	1	CL0001	sp|Q96PZ7|CSMD1_HUMAN CUB and sushi domain-containing protein 1 OS=Homo sapiens OX=9606 GN=CSMD1 PE=1 SV=3
1304	Q96PZ7	3155	3208	3155	3208	PF00084.21	Sushi	Domain	1	56	56	38.6	1.2e-09	1	CL0001	sp|Q96PZ7|CSMD1_HUMAN CUB and sushi domain-containing protein 1 OS=Homo sapiens OX=9606 GN=CSMD1 PE=1 SV=3
1305	Q96PZ7	3216	3270	3216	3270	PF00084.21	Sushi	Domain	1	56	56	38.3	1.5e-09	1	CL0001	sp|Q96PZ7|CSMD1_HUMAN CUB and sushi domain-containing protein 1 OS=Homo sapiens OX=9606 GN=CSMD1 PE=1 SV=3
1306	Q96PZ7	3275	3330	3275	3330	PF00084.21	Sushi	Domain	1	56	56	30.4	4.5e-07	1	CL0001	sp|Q96PZ7|CSMD1_HUMAN CUB and sushi domain-containing protein 1 OS=Homo sapiens OX=9606 GN=CSMD1 PE=1 SV=3
1307	Q7Z408	26	131	26	131	PF00431.21	CUB	Domain	1	110	110	71.4	7e-20	1	CL0164	sp|Q7Z408|CSMD2_HUMAN CUB and sushi domain-containing protein 2 OS=Homo sapiens OX=9606 GN=CSMD2 PE=1 SV=2
1308	Q7Z408	139	196	139	196	PF00084.21	Sushi	Domain	1	56	56	32.4	1e-07	1	CL0001	sp|Q7Z408|CSMD2_HUMAN CUB and sushi domain-containing protein 2 OS=Homo sapiens OX=9606 GN=CSMD2 PE=1 SV=2
1309	Q7Z408	202	303	202	303	PF00431.21	CUB	Domain	1	110	110	71	9.4e-20	1	CL0164	sp|Q7Z408|CSMD2_HUMAN CUB and sushi domain-containing protein 2 OS=Homo sapiens OX=9606 GN=CSMD2 PE=1 SV=2
1310	Q7Z408	343	400	343	400	PF00084.21	Sushi	Domain	1	56	56	29.7	7.4e-07	1	CL0001	sp|Q7Z408|CSMD2_HUMAN CUB and sushi domain-containing protein 2 OS=Homo sapiens OX=9606 GN=CSMD2 PE=1 SV=2
1311	Q7Z408	405	513	405	513	PF00431.21	CUB	Domain	1	110	110	74.6	7.4e-21	1	CL0164	sp|Q7Z408|CSMD2_HUMAN CUB and sushi domain-containing protein 2 OS=Homo sapiens OX=9606 GN=CSMD2 PE=1 SV=2
1312	Q7Z408	521	574	521	574	PF00084.21	Sushi	Domain	1	56	56	35.6	1e-08	1	CL0001	sp|Q7Z408|CSMD2_HUMAN CUB and sushi domain-containing protein 2 OS=Homo sapiens OX=9606 GN=CSMD2 PE=1 SV=2
1313	Q7Z408	578	683	578	683	PF00431.21	CUB	Domain	1	110	110	82.4	2.7e-23	1	CL0164	sp|Q7Z408|CSMD2_HUMAN CUB and sushi domain-containing protein 2 OS=Homo sapiens OX=9606 GN=CSMD2 PE=1 SV=2
1314	Q7Z408	691	748	691	748	PF00084.21	Sushi	Domain	1	56	56	21.6	0.00025	1	CL0001	sp|Q7Z408|CSMD2_HUMAN CUB and sushi domain-containing protein 2 OS=Homo sapiens OX=9606 GN=CSMD2 PE=1 SV=2
1315	Q7Z408	752	857	752	857	PF00431.21	CUB	Domain	1	110	110	85.6	2.7e-24	1	CL0164	sp|Q7Z408|CSMD2_HUMAN CUB and sushi domain-containing protein 2 OS=Homo sapiens OX=9606 GN=CSMD2 PE=1 SV=2
1316	Q7Z408	867	920	867	920	PF00084.21	Sushi	Domain	1	56	56	29.5	8.1e-07	1	CL0001	sp|Q7Z408|CSMD2_HUMAN CUB and sushi domain-containing protein 2 OS=Homo sapiens OX=9606 GN=CSMD2 PE=1 SV=2
1317	Q7Z408	924	1031	924	1031	PF00431.21	CUB	Domain	1	110	110	55.7	5.3e-15	1	CL0164	sp|Q7Z408|CSMD2_HUMAN CUB and sushi domain-containing protein 2 OS=Homo sapiens OX=9606 GN=CSMD2 PE=1 SV=2
1318	Q7Z408	1039	1094	1039	1094	PF00084.21	Sushi	Domain	1	56	56	26.8	5.9e-06	1	CL0001	sp|Q7Z408|CSMD2_HUMAN CUB and sushi domain-containing protein 2 OS=Homo sapiens OX=9606 GN=CSMD2 PE=1 SV=2
1319	Q7Z408	1098	1203	1098	1203	PF00431.21	CUB	Domain	1	110	110	74.5	8e-21	1	CL0164	sp|Q7Z408|CSMD2_HUMAN CUB and sushi domain-containing protein 2 OS=Homo sapiens OX=9606 GN=CSMD2 PE=1 SV=2
1320	Q7Z408	1211	1267	1211	1267	PF00084.21	Sushi	Domain	1	56	56	32.1	1.3e-07	1	CL0001	sp|Q7Z408|CSMD2_HUMAN CUB and sushi domain-containing protein 2 OS=Homo sapiens OX=9606 GN=CSMD2 PE=1 SV=2
1321	Q7Z408	1271	1377	1271	1377	PF00431.21	CUB	Domain	1	110	110	68.7	5.1e-19	1	CL0164	sp|Q7Z408|CSMD2_HUMAN CUB and sushi domain-containing protein 2 OS=Homo sapiens OX=9606 GN=CSMD2 PE=1 SV=2
1322	Q7Z408	1385	1441	1385	1441	PF00084.21	Sushi	Domain	1	56	56	29.2	1.1e-06	1	CL0001	sp|Q7Z408|CSMD2_HUMAN CUB and sushi domain-containing protein 2 OS=Homo sapiens OX=9606 GN=CSMD2 PE=1 SV=2
1323	Q7Z408	1445	1550	1445	1550	PF00431.21	CUB	Domain	1	110	110	94.4	5.1e-27	1	CL0164	sp|Q7Z408|CSMD2_HUMAN CUB and sushi domain-containing protein 2 OS=Homo sapiens OX=9606 GN=CSMD2 PE=1 SV=2
1324	Q7Z408	1558	1615	1558	1615	PF00084.21	Sushi	Domain	1	56	56	20.4	0.0006	1	CL0001	sp|Q7Z408|CSMD2_HUMAN CUB and sushi domain-containing protein 2 OS=Homo sapiens OX=9606 GN=CSMD2 PE=1 SV=2
1325	Q7Z408	1619	1724	1619	1724	PF00431.21	CUB	Domain	1	110	110	51.6	1e-13	1	CL0164	sp|Q7Z408|CSMD2_HUMAN CUB and sushi domain-containing protein 2 OS=Homo sapiens OX=9606 GN=CSMD2 PE=1 SV=2
1326	Q7Z408	1735	1792	1735	1792	PF00084.21	Sushi	Domain	1	56	56	27.1	4.6e-06	1	CL0001	sp|Q7Z408|CSMD2_HUMAN CUB and sushi domain-containing protein 2 OS=Homo sapiens OX=9606 GN=CSMD2 PE=1 SV=2
1327	Q7Z408	1796	1901	1796	1901	PF00431.21	CUB	Domain	1	110	110	82.3	3.1e-23	1	CL0164	sp|Q7Z408|CSMD2_HUMAN CUB and sushi domain-containing protein 2 OS=Homo sapiens OX=9606 GN=CSMD2 PE=1 SV=2
1328	Q7Z408	1909	1964	1909	1964	PF00084.21	Sushi	Domain	1	56	56	32.8	8e-08	1	CL0001	sp|Q7Z408|CSMD2_HUMAN CUB and sushi domain-containing protein 2 OS=Homo sapiens OX=9606 GN=CSMD2 PE=1 SV=2
1329	Q7Z408	1968	2073	1968	2073	PF00431.21	CUB	Domain	1	110	110	83	1.8e-23	1	CL0164	sp|Q7Z408|CSMD2_HUMAN CUB and sushi domain-containing protein 2 OS=Homo sapiens OX=9606 GN=CSMD2 PE=1 SV=2
1330	Q7Z408	2123	2178	2123	2178	PF00084.21	Sushi	Domain	1	56	56	42.5	7.4e-11	1	CL0001	sp|Q7Z408|CSMD2_HUMAN CUB and sushi domain-containing protein 2 OS=Homo sapiens OX=9606 GN=CSMD2 PE=1 SV=2
1331	Q7Z408	2182	2277	2182	2286	PF00431.21	CUB	Domain	1	100	110	65.3	5.7e-18	1	CL0164	sp|Q7Z408|CSMD2_HUMAN CUB and sushi domain-containing protein 2 OS=Homo sapiens OX=9606 GN=CSMD2 PE=1 SV=2
1332	Q7Z408	2294	2351	2294	2351	PF00084.21	Sushi	Domain	1	56	56	50.3	2.7e-13	1	CL0001	sp|Q7Z408|CSMD2_HUMAN CUB and sushi domain-containing protein 2 OS=Homo sapiens OX=9606 GN=CSMD2 PE=1 SV=2
1333	Q7Z408	2358	2463	2355	2463	PF00431.21	CUB	Domain	4	110	110	68.3	6.6e-19	1	CL0164	sp|Q7Z408|CSMD2_HUMAN CUB and sushi domain-containing protein 2 OS=Homo sapiens OX=9606 GN=CSMD2 PE=1 SV=2
1334	Q7Z408	2531	2588	2531	2588	PF00084.21	Sushi	Domain	1	56	56	30.9	3.1e-07	1	CL0001	sp|Q7Z408|CSMD2_HUMAN CUB and sushi domain-containing protein 2 OS=Homo sapiens OX=9606 GN=CSMD2 PE=1 SV=2
1335	Q7Z408	2593	2653	2591	2653	PF00084.21	Sushi	Domain	4	56	56	43.6	3.3e-11	1	CL0001	sp|Q7Z408|CSMD2_HUMAN CUB and sushi domain-containing protein 2 OS=Homo sapiens OX=9606 GN=CSMD2 PE=1 SV=2
1336	Q7Z408	2658	2711	2658	2711	PF00084.21	Sushi	Domain	1	56	56	31.7	1.8e-07	1	CL0001	sp|Q7Z408|CSMD2_HUMAN CUB and sushi domain-containing protein 2 OS=Homo sapiens OX=9606 GN=CSMD2 PE=1 SV=2
1337	Q7Z408	2716	2769	2716	2769	PF00084.21	Sushi	Domain	1	56	56	41.7	1.3e-10	1	CL0001	sp|Q7Z408|CSMD2_HUMAN CUB and sushi domain-containing protein 2 OS=Homo sapiens OX=9606 GN=CSMD2 PE=1 SV=2
1338	Q7Z408	2774	2827	2774	2827	PF00084.21	Sushi	Domain	1	56	56	33.1	6.4e-08	1	CL0001	sp|Q7Z408|CSMD2_HUMAN CUB and sushi domain-containing protein 2 OS=Homo sapiens OX=9606 GN=CSMD2 PE=1 SV=2
1339	Q7Z408	2835	2888	2835	2888	PF00084.21	Sushi	Domain	1	56	56	37.9	2e-09	1	CL0001	sp|Q7Z408|CSMD2_HUMAN CUB and sushi domain-containing protein 2 OS=Homo sapiens OX=9606 GN=CSMD2 PE=1 SV=2
1340	Q7Z408	2893	2947	2893	2947	PF00084.21	Sushi	Domain	1	56	56	34.8	1.8e-08	1	CL0001	sp|Q7Z408|CSMD2_HUMAN CUB and sushi domain-containing protein 2 OS=Homo sapiens OX=9606 GN=CSMD2 PE=1 SV=2
1341	Q7Z408	2952	3007	2952	3007	PF00084.21	Sushi	Domain	1	56	56	35.4	1.2e-08	1	CL0001	sp|Q7Z408|CSMD2_HUMAN CUB and sushi domain-containing protein 2 OS=Homo sapiens OX=9606 GN=CSMD2 PE=1 SV=2
1342	Q7Z408	3012	3065	3012	3065	PF00084.21	Sushi	Domain	1	56	56	43.4	3.8e-11	1	CL0001	sp|Q7Z408|CSMD2_HUMAN CUB and sushi domain-containing protein 2 OS=Homo sapiens OX=9606 GN=CSMD2 PE=1 SV=2
1343	Q7Z408	3070	3123	3070	3123	PF00084.21	Sushi	Domain	1	56	56	32.9	7.5e-08	1	CL0001	sp|Q7Z408|CSMD2_HUMAN CUB and sushi domain-containing protein 2 OS=Homo sapiens OX=9606 GN=CSMD2 PE=1 SV=2
1344	Q7Z408	3131	3185	3131	3185	PF00084.21	Sushi	Domain	1	56	56	39.4	6.6e-10	1	CL0001	sp|Q7Z408|CSMD2_HUMAN CUB and sushi domain-containing protein 2 OS=Homo sapiens OX=9606 GN=CSMD2 PE=1 SV=2
1345	Q7Z408	3190	3245	3190	3245	PF00084.21	Sushi	Domain	1	56	56	34.3	2.6e-08	1	CL0001	sp|Q7Z408|CSMD2_HUMAN CUB and sushi domain-containing protein 2 OS=Homo sapiens OX=9606 GN=CSMD2 PE=1 SV=2
1346	Q9C0I4	44	94	44	97	PF19030.1	TSP1_ADAMTS	Domain	1	51	55	29.8	5.5e-07	1	CL0692	sp|Q9C0I4|THS7B_HUMAN Thrombospondin type-1 domain-containing protein 7B OS=Homo sapiens OX=9606 GN=THSD7B PE=2 SV=3
1347	Q9C0I4	180	229	180	232	PF19028.1	TSP1_spondin	Domain	1	50	52	52.9	3.4e-14	1	CL0692	sp|Q9C0I4|THS7B_HUMAN Thrombospondin type-1 domain-containing protein 7B OS=Homo sapiens OX=9606 GN=THSD7B PE=2 SV=3
1348	Q9C0I4	337	389	337	392	PF19028.1	TSP1_spondin	Domain	1	48	52	48.9	6.1e-13	1	CL0692	sp|Q9C0I4|THS7B_HUMAN Thrombospondin type-1 domain-containing protein 7B OS=Homo sapiens OX=9606 GN=THSD7B PE=2 SV=3
1349	Q9C0I4	602	660	602	660	PF19028.1	TSP1_spondin	Domain	1	52	52	54.1	1.4e-14	1	CL0692	sp|Q9C0I4|THS7B_HUMAN Thrombospondin type-1 domain-containing protein 7B OS=Homo sapiens OX=9606 GN=THSD7B PE=2 SV=3
1350	Q9C0I4	692	732	689	738	PF19030.1	TSP1_ADAMTS	Domain	11	52	55	26.1	7.7e-06	1	CL0692	sp|Q9C0I4|THS7B_HUMAN Thrombospondin type-1 domain-containing protein 7B OS=Homo sapiens OX=9606 GN=THSD7B PE=2 SV=3
1351	Q9C0I4	738	795	738	795	PF19028.1	TSP1_spondin	Domain	1	52	52	52	6.5e-14	1	CL0692	sp|Q9C0I4|THS7B_HUMAN Thrombospondin type-1 domain-containing protein 7B OS=Homo sapiens OX=9606 GN=THSD7B PE=2 SV=3
1352	Q9C0I4	1004	1053	1004	1053	PF00090.20	TSP_1	Domain	1	49	49	29.7	5.4e-07	1	CL0692	sp|Q9C0I4|THS7B_HUMAN Thrombospondin type-1 domain-containing protein 7B OS=Homo sapiens OX=9606 GN=THSD7B PE=2 SV=3
1353	Q9C0I4	1062	1122	1062	1124	PF19030.1	TSP1_ADAMTS	Domain	1	52	55	31.8	1.3e-07	1	CL0692	sp|Q9C0I4|THS7B_HUMAN Thrombospondin type-1 domain-containing protein 7B OS=Homo sapiens OX=9606 GN=THSD7B PE=2 SV=3
1354	Q9C0I4	1131	1180	1131	1180	PF00090.20	TSP_1	Domain	1	49	49	17.8	0.0028	1	CL0692	sp|Q9C0I4|THS7B_HUMAN Thrombospondin type-1 domain-containing protein 7B OS=Homo sapiens OX=9606 GN=THSD7B PE=2 SV=3
1355	Q9C0I4	1248	1301	1248	1301	PF19028.1	TSP1_spondin	Domain	1	52	52	51.3	1.1e-13	1	CL0692	sp|Q9C0I4|THS7B_HUMAN Thrombospondin type-1 domain-containing protein 7B OS=Homo sapiens OX=9606 GN=THSD7B PE=2 SV=3
1356	Q9C0I4	1371	1430	1371	1430	PF19028.1	TSP1_spondin	Domain	1	52	52	49.2	5e-13	1	CL0692	sp|Q9C0I4|THS7B_HUMAN Thrombospondin type-1 domain-containing protein 7B OS=Homo sapiens OX=9606 GN=THSD7B PE=2 SV=3
1357	Q8NDA2	516	590	516	590	PF13927.7	Ig_3	Domain	1	79	79	39.3	7.6e-10	1	CL0011	sp|Q8NDA2|HMCN2_HUMAN Hemicentin-2 OS=Homo sapiens OX=9606 GN=HMCN2 PE=2 SV=3
1358	Q8NDA2	607	691	607	692	PF07679.17	I-set	Domain	1	88	90	67.1	1.1e-18	1	CL0011	sp|Q8NDA2|HMCN2_HUMAN Hemicentin-2 OS=Homo sapiens OX=9606 GN=HMCN2 PE=2 SV=3
1359	Q8NDA2	696	768	696	768	PF13927.7	Ig_3	Domain	1	79	79	53.3	3.1e-14	1	CL0011	sp|Q8NDA2|HMCN2_HUMAN Hemicentin-2 OS=Homo sapiens OX=9606 GN=HMCN2 PE=2 SV=3
1360	Q8NDA2	785	878	785	878	PF07679.17	I-set	Domain	1	90	90	51.1	1.1e-13	1	CL0011	sp|Q8NDA2|HMCN2_HUMAN Hemicentin-2 OS=Homo sapiens OX=9606 GN=HMCN2 PE=2 SV=3
1361	Q8NDA2	883	958	883	958	PF13927.7	Ig_3	Domain	1	79	79	49	7e-13	1	CL0011	sp|Q8NDA2|HMCN2_HUMAN Hemicentin-2 OS=Homo sapiens OX=9606 GN=HMCN2 PE=2 SV=3
1362	Q8NDA2	974	1049	974	1049	PF13927.7	Ig_3	Domain	1	79	79	51.2	1.4e-13	1	CL0011	sp|Q8NDA2|HMCN2_HUMAN Hemicentin-2 OS=Homo sapiens OX=9606 GN=HMCN2 PE=2 SV=3
1363	Q8NDA2	1079	1158	1076	1160	PF07679.17	I-set	Domain	7	88	90	54.4	9.7e-15	1	CL0011	sp|Q8NDA2|HMCN2_HUMAN Hemicentin-2 OS=Homo sapiens OX=9606 GN=HMCN2 PE=2 SV=3
1364	Q8NDA2	1163	1232	1163	1232	PF13927.7	Ig_3	Domain	1	79	79	44.9	1.4e-11	1	CL0011	sp|Q8NDA2|HMCN2_HUMAN Hemicentin-2 OS=Homo sapiens OX=9606 GN=HMCN2 PE=2 SV=3
1365	Q8NDA2	1263	1339	1255	1339	PF07679.17	I-set	Domain	13	90	90	51.5	8.1e-14	1	CL0011	sp|Q8NDA2|HMCN2_HUMAN Hemicentin-2 OS=Homo sapiens OX=9606 GN=HMCN2 PE=2 SV=3
1366	Q8NDA2	1353	1432	1347	1432	PF07679.17	I-set	Domain	9	90	90	48	9.9e-13	1	CL0011	sp|Q8NDA2|HMCN2_HUMAN Hemicentin-2 OS=Homo sapiens OX=9606 GN=HMCN2 PE=2 SV=3
1367	Q8NDA2	1451	1526	1443	1526	PF07679.17	I-set	Domain	14	90	90	47.8	1.1e-12	1	CL0011	sp|Q8NDA2|HMCN2_HUMAN Hemicentin-2 OS=Homo sapiens OX=9606 GN=HMCN2 PE=2 SV=3
1368	Q8NDA2	1540	1619	1535	1619	PF07679.17	I-set	Domain	9	90	90	56.8	1.8e-15	1	CL0011	sp|Q8NDA2|HMCN2_HUMAN Hemicentin-2 OS=Homo sapiens OX=9606 GN=HMCN2 PE=2 SV=3
1369	Q8NDA2	1634	1699	1622	1700	PF13927.7	Ig_3	Domain	10	78	79	35.3	1.3e-08	1	CL0011	sp|Q8NDA2|HMCN2_HUMAN Hemicentin-2 OS=Homo sapiens OX=9606 GN=HMCN2 PE=2 SV=3
1370	Q8NDA2	1726	1806	1721	1806	PF07679.17	I-set	Domain	8	90	90	53.5	1.8e-14	1	CL0011	sp|Q8NDA2|HMCN2_HUMAN Hemicentin-2 OS=Homo sapiens OX=9606 GN=HMCN2 PE=2 SV=3
1371	Q8NDA2	1826	1890	1814	1890	PF07679.17	I-set	Domain	16	90	90	31.7	1.2e-07	1	CL0011	sp|Q8NDA2|HMCN2_HUMAN Hemicentin-2 OS=Homo sapiens OX=9606 GN=HMCN2 PE=2 SV=3
1372	Q8NDA2	1895	1981	1894	1981	PF07679.17	I-set	Domain	2	90	90	56.9	1.6e-15	1	CL0011	sp|Q8NDA2|HMCN2_HUMAN Hemicentin-2 OS=Homo sapiens OX=9606 GN=HMCN2 PE=2 SV=3
1373	Q8NDA2	1984	2060	1984	2062	PF13927.7	Ig_3	Domain	1	77	79	51	1.7e-13	1	CL0011	sp|Q8NDA2|HMCN2_HUMAN Hemicentin-2 OS=Homo sapiens OX=9606 GN=HMCN2 PE=2 SV=3
1374	Q8NDA2	2086	2166	2079	2166	PF07679.17	I-set	Domain	8	90	90	47.5	1.4e-12	1	CL0011	sp|Q8NDA2|HMCN2_HUMAN Hemicentin-2 OS=Homo sapiens OX=9606 GN=HMCN2 PE=2 SV=3
1375	Q8NDA2	2176	2260	2170	2260	PF07679.17	I-set	Domain	6	90	90	46.5	2.8e-12	1	CL0011	sp|Q8NDA2|HMCN2_HUMAN Hemicentin-2 OS=Homo sapiens OX=9606 GN=HMCN2 PE=2 SV=3
1376	Q8NDA2	2272	2354	2270	2354	PF07679.17	I-set	Domain	6	90	90	54.6	8.4e-15	1	CL0011	sp|Q8NDA2|HMCN2_HUMAN Hemicentin-2 OS=Homo sapiens OX=9606 GN=HMCN2 PE=2 SV=3
1377	Q8NDA2	2367	2448	2364	2448	PF07679.17	I-set	Domain	7	90	90	38.3	1e-09	1	CL0011	sp|Q8NDA2|HMCN2_HUMAN Hemicentin-2 OS=Homo sapiens OX=9606 GN=HMCN2 PE=2 SV=3
1378	Q8NDA2	2463	2541	2456	2541	PF07679.17	I-set	Domain	10	90	90	56.9	1.7e-15	1	CL0011	sp|Q8NDA2|HMCN2_HUMAN Hemicentin-2 OS=Homo sapiens OX=9606 GN=HMCN2 PE=2 SV=3
1379	Q8NDA2	2557	2637	2553	2637	PF07679.17	I-set	Domain	8	90	90	52.2	5e-14	1	CL0011	sp|Q8NDA2|HMCN2_HUMAN Hemicentin-2 OS=Homo sapiens OX=9606 GN=HMCN2 PE=2 SV=3
1380	Q8NDA2	2654	2733	2648	2735	PF07679.17	I-set	Domain	7	88	90	57.6	1e-15	1	CL0011	sp|Q8NDA2|HMCN2_HUMAN Hemicentin-2 OS=Homo sapiens OX=9606 GN=HMCN2 PE=2 SV=3
1381	Q8NDA2	2769	2846	2764	2846	PF07679.17	I-set	Domain	11	90	90	40.3	2.5e-10	1	CL0011	sp|Q8NDA2|HMCN2_HUMAN Hemicentin-2 OS=Homo sapiens OX=9606 GN=HMCN2 PE=2 SV=3
1382	Q8NDA2	2860	2941	2856	2941	PF07679.17	I-set	Domain	7	90	90	52.6	3.5e-14	1	CL0011	sp|Q8NDA2|HMCN2_HUMAN Hemicentin-2 OS=Homo sapiens OX=9606 GN=HMCN2 PE=2 SV=3
1383	Q8NDA2	2952	3033	2948	3033	PF07679.17	I-set	Domain	7	90	90	48.7	5.9e-13	1	CL0011	sp|Q8NDA2|HMCN2_HUMAN Hemicentin-2 OS=Homo sapiens OX=9606 GN=HMCN2 PE=2 SV=3
1384	Q8NDA2	3048	3128	3037	3128	PF07679.17	I-set	Domain	8	90	90	59.9	2e-16	1	CL0011	sp|Q8NDA2|HMCN2_HUMAN Hemicentin-2 OS=Homo sapiens OX=9606 GN=HMCN2 PE=2 SV=3
1385	Q8NDA2	3131	3207	3131	3207	PF13927.7	Ig_3	Domain	1	79	79	53.9	2e-14	1	CL0011	sp|Q8NDA2|HMCN2_HUMAN Hemicentin-2 OS=Homo sapiens OX=9606 GN=HMCN2 PE=2 SV=3
1386	Q8NDA2	3233	3313	3227	3315	PF07679.17	I-set	Domain	8	88	90	53.6	1.8e-14	1	CL0011	sp|Q8NDA2|HMCN2_HUMAN Hemicentin-2 OS=Homo sapiens OX=9606 GN=HMCN2 PE=2 SV=3
1387	Q8NDA2	3332	3409	3327	3409	PF07679.17	I-set	Domain	11	90	90	49.3	4e-13	1	CL0011	sp|Q8NDA2|HMCN2_HUMAN Hemicentin-2 OS=Homo sapiens OX=9606 GN=HMCN2 PE=2 SV=3
1388	Q8NDA2	3422	3498	3418	3498	PF07679.17	I-set	Domain	8	90	90	44.8	9.7e-12	1	CL0011	sp|Q8NDA2|HMCN2_HUMAN Hemicentin-2 OS=Homo sapiens OX=9606 GN=HMCN2 PE=2 SV=3
1389	Q8NDA2	3509	3589	3505	3589	PF07679.17	I-set	Domain	6	90	90	49	4.7e-13	1	CL0011	sp|Q8NDA2|HMCN2_HUMAN Hemicentin-2 OS=Homo sapiens OX=9606 GN=HMCN2 PE=2 SV=3
1390	Q8NDA2	3612	3682	3603	3682	PF07679.17	I-set	Domain	18	90	90	44.5	1.2e-11	1	CL0011	sp|Q8NDA2|HMCN2_HUMAN Hemicentin-2 OS=Homo sapiens OX=9606 GN=HMCN2 PE=2 SV=3
1391	Q8NDA2	3686	3771	3686	3773	PF07679.17	I-set	Domain	1	88	90	50.2	2.1e-13	1	CL0011	sp|Q8NDA2|HMCN2_HUMAN Hemicentin-2 OS=Homo sapiens OX=9606 GN=HMCN2 PE=2 SV=3
1392	Q8NDA2	3777	3847	3774	3847	PF07679.17	I-set	Domain	20	90	90	25.2	1.3e-05	1	CL0011	sp|Q8NDA2|HMCN2_HUMAN Hemicentin-2 OS=Homo sapiens OX=9606 GN=HMCN2 PE=2 SV=3
1393	Q8NDA2	3853	3938	3851	3938	PF07679.17	I-set	Domain	3	90	90	38.4	9.5e-10	1	CL0011	sp|Q8NDA2|HMCN2_HUMAN Hemicentin-2 OS=Homo sapiens OX=9606 GN=HMCN2 PE=2 SV=3
1394	Q8NDA2	3942	4015	3941	4015	PF13927.7	Ig_3	Domain	2	79	79	48	1.4e-12	1	CL0011	sp|Q8NDA2|HMCN2_HUMAN Hemicentin-2 OS=Homo sapiens OX=9606 GN=HMCN2 PE=2 SV=3
1395	Q8NDA2	4032	4119	4032	4119	PF07679.17	I-set	Domain	1	90	90	59.5	2.5e-16	1	CL0011	sp|Q8NDA2|HMCN2_HUMAN Hemicentin-2 OS=Homo sapiens OX=9606 GN=HMCN2 PE=2 SV=3
1396	Q8NDA2	4123	4195	4123	4195	PF13927.7	Ig_3	Domain	2	79	79	44.3	2e-11	1	CL0011	sp|Q8NDA2|HMCN2_HUMAN Hemicentin-2 OS=Homo sapiens OX=9606 GN=HMCN2 PE=2 SV=3
1397	Q8NDA2	4226	4297	4217	4299	PF07679.17	I-set	Domain	14	88	90	49.7	2.8e-13	1	CL0011	sp|Q8NDA2|HMCN2_HUMAN Hemicentin-2 OS=Homo sapiens OX=9606 GN=HMCN2 PE=2 SV=3
1398	Q8NDA2	4303	4389	4303	4389	PF07679.17	I-set	Domain	1	90	90	71.7	3.9e-20	1	CL0011	sp|Q8NDA2|HMCN2_HUMAN Hemicentin-2 OS=Homo sapiens OX=9606 GN=HMCN2 PE=2 SV=3
1399	Q8NDA2	4391	4570	4391	4573	PF07474.13	G2F	Domain	1	181	184	152	1.6e-44	1	CL0069	sp|Q8NDA2|HMCN2_HUMAN Hemicentin-2 OS=Homo sapiens OX=9606 GN=HMCN2 PE=2 SV=3
1400	Q8NDA2	4628	4667	4628	4667	PF07645.16	EGF_CA	Domain	1	42	42	21.7	0.00017	1	CL0001	sp|Q8NDA2|HMCN2_HUMAN Hemicentin-2 OS=Homo sapiens OX=9606 GN=HMCN2 PE=2 SV=3
1401	Q8NDA2	4669	4706	4669	4711	PF07645.16	EGF_CA	Domain	1	37	42	34.9	1.3e-08	1	CL0001	sp|Q8NDA2|HMCN2_HUMAN Hemicentin-2 OS=Homo sapiens OX=9606 GN=HMCN2 PE=2 SV=3
1402	Q8NDA2	4713	4754	4713	4754	PF07645.16	EGF_CA	Domain	1	42	42	37.9	1.5e-09	1	CL0001	sp|Q8NDA2|HMCN2_HUMAN Hemicentin-2 OS=Homo sapiens OX=9606 GN=HMCN2 PE=2 SV=3
1403	Q8NDA2	4756	4795	4756	4795	PF07645.16	EGF_CA	Domain	1	42	42	32.2	9.2e-08	1	CL0001	sp|Q8NDA2|HMCN2_HUMAN Hemicentin-2 OS=Homo sapiens OX=9606 GN=HMCN2 PE=2 SV=3
1404	Q8NDA2	4883	4906	4883	4906	PF12662.8	cEGF	Domain	1	24	24	37.4	1.8e-09	1	CL0001	sp|Q8NDA2|HMCN2_HUMAN Hemicentin-2 OS=Homo sapiens OX=9606 GN=HMCN2 PE=2 SV=3
1405	Q9UPZ6	61	112	61	115	PF19030.1	TSP1_ADAMTS	Domain	1	51	55	25.8	9.6e-06	1	CL0692	sp|Q9UPZ6|THS7A_HUMAN Thrombospondin type-1 domain-containing protein 7A OS=Homo sapiens OX=9606 GN=THSD7A PE=1 SV=4
1406	Q9UPZ6	195	246	195	246	PF19028.1	TSP1_spondin	Domain	1	52	52	63	2.3e-17	1	CL0692	sp|Q9UPZ6|THS7A_HUMAN Thrombospondin type-1 domain-containing protein 7A OS=Homo sapiens OX=9606 GN=THSD7A PE=1 SV=4
1407	Q9UPZ6	364	412	364	416	PF00090.20	TSP_1	Domain	1	44	49	26.6	5e-06	1	CL0692	sp|Q9UPZ6|THS7A_HUMAN Thrombospondin type-1 domain-containing protein 7A OS=Homo sapiens OX=9606 GN=THSD7A PE=1 SV=4
1408	Q9UPZ6	635	694	635	694	PF19028.1	TSP1_spondin	Domain	1	52	52	49	5.5e-13	1	CL0692	sp|Q9UPZ6|THS7A_HUMAN Thrombospondin type-1 domain-containing protein 7A OS=Homo sapiens OX=9606 GN=THSD7A PE=1 SV=4
1409	Q9UPZ6	776	829	775	830	PF00090.20	TSP_1	Domain	2	48	49	20.5	0.00042	1	CL0692	sp|Q9UPZ6|THS7A_HUMAN Thrombospondin type-1 domain-containing protein 7A OS=Homo sapiens OX=9606 GN=THSD7A PE=1 SV=4
1410	Q9UPZ6	911	957	910	960	PF00090.20	TSP_1	Domain	2	45	49	13.2	0.081	1	CL0692	sp|Q9UPZ6|THS7A_HUMAN Thrombospondin type-1 domain-containing protein 7A OS=Homo sapiens OX=9606 GN=THSD7A PE=1 SV=4
1411	Q9UPZ6	1039	1076	1039	1093	PF00090.20	TSP_1	Domain	1	37	49	31.1	2.1e-07	1	CL0692	sp|Q9UPZ6|THS7A_HUMAN Thrombospondin type-1 domain-containing protein 7A OS=Homo sapiens OX=9606 GN=THSD7A PE=1 SV=4
1412	Q9UPZ6	1099	1160	1099	1162	PF19030.1	TSP1_ADAMTS	Domain	1	52	55	30	4.5e-07	1	CL0692	sp|Q9UPZ6|THS7A_HUMAN Thrombospondin type-1 domain-containing protein 7A OS=Homo sapiens OX=9606 GN=THSD7A PE=1 SV=4
1413	Q9UPZ6	1169	1219	1169	1219	PF00090.20	TSP_1	Domain	1	49	49	14	0.044	1	CL0692	sp|Q9UPZ6|THS7A_HUMAN Thrombospondin type-1 domain-containing protein 7A OS=Homo sapiens OX=9606 GN=THSD7A PE=1 SV=4
1414	Q9UPZ6	1287	1340	1287	1340	PF19028.1	TSP1_spondin	Domain	1	52	52	58.2	7.3e-16	1	CL0692	sp|Q9UPZ6|THS7A_HUMAN Thrombospondin type-1 domain-containing protein 7A OS=Homo sapiens OX=9606 GN=THSD7A PE=1 SV=4
1415	Q9UPZ6	1346	1388	1344	1392	PF00090.20	TSP_1	Domain	4	44	49	16.1	0.0098	1	CL0692	sp|Q9UPZ6|THS7A_HUMAN Thrombospondin type-1 domain-containing protein 7A OS=Homo sapiens OX=9606 GN=THSD7A PE=1 SV=4
1416	Q9UPZ6	1415	1474	1415	1474	PF19028.1	TSP1_spondin	Domain	1	52	52	49.8	3.3e-13	1	CL0692	sp|Q9UPZ6|THS7A_HUMAN Thrombospondin type-1 domain-containing protein 7A OS=Homo sapiens OX=9606 GN=THSD7A PE=1 SV=4
1417	Q9UGM3	105	202	105	202	PF00530.19	SRCR	Domain	1	100	100	105.7	1.3e-30	1	CL0550	sp|Q9UGM3|DMBT1_HUMAN Deleted in malignant brain tumors 1 protein OS=Homo sapiens OX=9606 GN=DMBT1 PE=1 SV=2
1418	Q9UGM3	237	334	237	334	PF00530.19	SRCR	Domain	1	100	100	107.4	4e-31	1	CL0550	sp|Q9UGM3|DMBT1_HUMAN Deleted in malignant brain tumors 1 protein OS=Homo sapiens OX=9606 GN=DMBT1 PE=1 SV=2
1419	Q9UGM3	366	463	366	463	PF00530.19	SRCR	Domain	1	100	100	109.1	1.2e-31	1	CL0550	sp|Q9UGM3|DMBT1_HUMAN Deleted in malignant brain tumors 1 protein OS=Homo sapiens OX=9606 GN=DMBT1 PE=1 SV=2
1420	Q9UGM3	497	594	497	594	PF00530.19	SRCR	Domain	1	100	100	109.5	8.6e-32	1	CL0550	sp|Q9UGM3|DMBT1_HUMAN Deleted in malignant brain tumors 1 protein OS=Homo sapiens OX=9606 GN=DMBT1 PE=1 SV=2
1421	Q9UGM3	605	702	605	702	PF00530.19	SRCR	Domain	1	100	100	106.8	6.1e-31	1	CL0550	sp|Q9UGM3|DMBT1_HUMAN Deleted in malignant brain tumors 1 protein OS=Homo sapiens OX=9606 GN=DMBT1 PE=1 SV=2
1422	Q9UGM3	736	833	736	833	PF00530.19	SRCR	Domain	1	100	100	109.8	7.2e-32	1	CL0550	sp|Q9UGM3|DMBT1_HUMAN Deleted in malignant brain tumors 1 protein OS=Homo sapiens OX=9606 GN=DMBT1 PE=1 SV=2
1423	Q9UGM3	865	962	865	962	PF00530.19	SRCR	Domain	1	100	100	109.1	1.2e-31	1	CL0550	sp|Q9UGM3|DMBT1_HUMAN Deleted in malignant brain tumors 1 protein OS=Homo sapiens OX=9606 GN=DMBT1 PE=1 SV=2
1424	Q9UGM3	996	1093	996	1093	PF00530.19	SRCR	Domain	1	100	100	109.5	8.8e-32	1	CL0550	sp|Q9UGM3|DMBT1_HUMAN Deleted in malignant brain tumors 1 protein OS=Homo sapiens OX=9606 GN=DMBT1 PE=1 SV=2
1425	Q9UGM3	1125	1222	1125	1222	PF00530.19	SRCR	Domain	1	100	100	108.2	2.2e-31	1	CL0550	sp|Q9UGM3|DMBT1_HUMAN Deleted in malignant brain tumors 1 protein OS=Homo sapiens OX=9606 GN=DMBT1 PE=1 SV=2
1426	Q9UGM3	1254	1351	1254	1351	PF00530.19	SRCR	Domain	1	100	100	107.9	2.7e-31	1	CL0550	sp|Q9UGM3|DMBT1_HUMAN Deleted in malignant brain tumors 1 protein OS=Homo sapiens OX=9606 GN=DMBT1 PE=1 SV=2
1427	Q9UGM3	1383	1480	1383	1480	PF00530.19	SRCR	Domain	1	100	100	107.9	2.7e-31	1	CL0550	sp|Q9UGM3|DMBT1_HUMAN Deleted in malignant brain tumors 1 protein OS=Homo sapiens OX=9606 GN=DMBT1 PE=1 SV=2
1428	Q9UGM3	1512	1609	1512	1609	PF00530.19	SRCR	Domain	1	100	100	107.7	3.3e-31	1	CL0550	sp|Q9UGM3|DMBT1_HUMAN Deleted in malignant brain tumors 1 protein OS=Homo sapiens OX=9606 GN=DMBT1 PE=1 SV=2
1429	Q9UGM3	1643	1740	1643	1740	PF00530.19	SRCR	Domain	1	100	100	109.8	6.9e-32	1	CL0550	sp|Q9UGM3|DMBT1_HUMAN Deleted in malignant brain tumors 1 protein OS=Homo sapiens OX=9606 GN=DMBT1 PE=1 SV=2
1430	Q9UGM3	1766	1874	1766	1874	PF00431.21	CUB	Domain	1	110	110	95.6	2.3e-27	1	CL0164	sp|Q9UGM3|DMBT1_HUMAN Deleted in malignant brain tumors 1 protein OS=Homo sapiens OX=9606 GN=DMBT1 PE=1 SV=2
1431	Q9UGM3	1895	1986	1889	1986	PF00530.19	SRCR	Domain	7	100	100	106.3	8.8e-31	1	CL0550	sp|Q9UGM3|DMBT1_HUMAN Deleted in malignant brain tumors 1 protein OS=Homo sapiens OX=9606 GN=DMBT1 PE=1 SV=2
1432	Q9UGM3	2008	2114	2008	2114	PF00431.21	CUB	Domain	1	110	110	95.1	3.1e-27	1	CL0164	sp|Q9UGM3|DMBT1_HUMAN Deleted in malignant brain tumors 1 protein OS=Homo sapiens OX=9606 GN=DMBT1 PE=1 SV=2
1433	Q9UGM3	2127	2378	2127	2379	PF00100.24	Zona_pellucida	Family	1	253	254	158.9	1.9e-46	1	CL0159	sp|Q9UGM3|DMBT1_HUMAN Deleted in malignant brain tumors 1 protein OS=Homo sapiens OX=9606 GN=DMBT1 PE=1 SV=2
1434	P78504	32	107	32	107	PF07657.14	MNNL	Family	1	75	75	99.6	8.1e-29	1	CL0154	sp|P78504|JAG1_HUMAN Protein jagged-1 OS=Homo sapiens OX=9606 GN=JAG1 PE=1 SV=3
1435	P78504	167	229	167	229	PF01414.20	DSL	Domain	1	63	63	87.6	4.4e-25	1	CL0001	sp|P78504|JAG1_HUMAN Protein jagged-1 OS=Homo sapiens OX=9606 GN=JAG1 PE=1 SV=3
1436	P78504	300	332	300	332	PF00008.28	EGF	Domain	1	32	32	24.5	2.5e-05	1	CL0001	sp|P78504|JAG1_HUMAN Protein jagged-1 OS=Homo sapiens OX=9606 GN=JAG1 PE=1 SV=3
1437	P78504	340	370	340	370	PF00008.28	EGF	Domain	1	32	32	31.5	1.6e-07	1	CL0001	sp|P78504|JAG1_HUMAN Protein jagged-1 OS=Homo sapiens OX=9606 GN=JAG1 PE=1 SV=3
1438	P78504	378	408	378	408	PF00008.28	EGF	Domain	1	32	32	33.6	3.6e-08	1	CL0001	sp|P78504|JAG1_HUMAN Protein jagged-1 OS=Homo sapiens OX=9606 GN=JAG1 PE=1 SV=3
1439	P78504	412	445	412	450	PF07645.16	EGF_CA	Domain	1	35	42	21.6	0.00019	1	CL0001	sp|P78504|JAG1_HUMAN Protein jagged-1 OS=Homo sapiens OX=9606 GN=JAG1 PE=1 SV=3
1440	P78504	456	483	450	483	PF00008.28	EGF	Domain	4	32	32	31.1	2.1e-07	1	CL0001	sp|P78504|JAG1_HUMAN Protein jagged-1 OS=Homo sapiens OX=9606 GN=JAG1 PE=1 SV=3
1441	P78504	491	520	491	521	PF00008.28	EGF	Domain	1	31	32	33.3	4.5e-08	1	CL0001	sp|P78504|JAG1_HUMAN Protein jagged-1 OS=Homo sapiens OX=9606 GN=JAG1 PE=1 SV=3
1442	P78504	529	559	529	559	PF00008.28	EGF	Domain	1	32	32	25.5	1.2e-05	1	CL0001	sp|P78504|JAG1_HUMAN Protein jagged-1 OS=Homo sapiens OX=9606 GN=JAG1 PE=1 SV=3
1443	P78504	633	663	633	663	PF00008.28	EGF	Domain	1	32	32	34.6	1.7e-08	1	CL0001	sp|P78504|JAG1_HUMAN Protein jagged-1 OS=Homo sapiens OX=9606 GN=JAG1 PE=1 SV=3
1444	P78504	671	701	671	701	PF00008.28	EGF	Domain	1	32	32	37.8	1.7e-09	1	CL0001	sp|P78504|JAG1_HUMAN Protein jagged-1 OS=Homo sapiens OX=9606 GN=JAG1 PE=1 SV=3
1445	P78504	748	777	748	777	PF00008.28	EGF	Domain	1	31	32	34.9	1.4e-08	1	CL0001	sp|P78504|JAG1_HUMAN Protein jagged-1 OS=Homo sapiens OX=9606 GN=JAG1 PE=1 SV=3
1446	P78504	786	815	786	816	PF00008.28	EGF	Domain	1	31	32	28.7	1.2e-06	1	CL0001	sp|P78504|JAG1_HUMAN Protein jagged-1 OS=Homo sapiens OX=9606 GN=JAG1 PE=1 SV=3
1447	P78504	829	849	829	849	PF12661.8	hEGF	Domain	1	21	22	22.9	9.8e-05	1	CL0001	sp|P78504|JAG1_HUMAN Protein jagged-1 OS=Homo sapiens OX=9606 GN=JAG1 PE=1 SV=3
1448	P59510	41	186	41	186	PF01562.20	Pep_M12B_propep	Family	1	140	140	115.5	2.2e-33	1	No_clan	sp|P59510|ATS20_HUMAN A disintegrin and metalloproteinase with thrombospondin motifs 20 OS=Homo sapiens OX=9606 GN=ADAMTS20 PE=2 SV=2
1449	P59510	259	467	259	467	PF01421.20	Reprolysin	Domain	1	200	200	85.8	3.8e-24	1	CL0126	sp|P59510|ATS20_HUMAN A disintegrin and metalloproteinase with thrombospondin motifs 20 OS=Homo sapiens OX=9606 GN=ADAMTS20 PE=2 SV=2
1450	P59510	479	546	479	546	PF17771.2	ADAM_CR_2	Domain	1	70	70	66.1	3e-18	1	No_clan	sp|P59510|ATS20_HUMAN A disintegrin and metalloproteinase with thrombospondin motifs 20 OS=Homo sapiens OX=9606 GN=ADAMTS20 PE=2 SV=2
1451	P59510	560	610	560	610	PF00090.20	TSP_1	Domain	1	49	49	30.5	3.2e-07	1	CL0692	sp|P59510|ATS20_HUMAN A disintegrin and metalloproteinase with thrombospondin motifs 20 OS=Homo sapiens OX=9606 GN=ADAMTS20 PE=2 SV=2
1452	P59510	721	840	721	840	PF05986.15	ADAM_spacer1	Family	1	114	114	98.3	2.8e-28	1	No_clan	sp|P59510|ATS20_HUMAN A disintegrin and metalloproteinase with thrombospondin motifs 20 OS=Homo sapiens OX=9606 GN=ADAMTS20 PE=2 SV=2
1453	P59510	853	902	850	904	PF19030.1	TSP1_ADAMTS	Domain	3	52	55	29.2	8.5e-07	1	CL0692	sp|P59510|ATS20_HUMAN A disintegrin and metalloproteinase with thrombospondin motifs 20 OS=Homo sapiens OX=9606 GN=ADAMTS20 PE=2 SV=2
1454	P59510	914	962	908	965	PF19030.1	TSP1_ADAMTS	Domain	7	51	55	27.1	3.8e-06	1	CL0692	sp|P59510|ATS20_HUMAN A disintegrin and metalloproteinase with thrombospondin motifs 20 OS=Homo sapiens OX=9606 GN=ADAMTS20 PE=2 SV=2
1455	P59510	970	1022	970	1022	PF19030.1	TSP1_ADAMTS	Domain	1	55	55	33.6	3.6e-08	1	CL0692	sp|P59510|ATS20_HUMAN A disintegrin and metalloproteinase with thrombospondin motifs 20 OS=Homo sapiens OX=9606 GN=ADAMTS20 PE=2 SV=2
1456	P59510	1025	1077	1025	1077	PF19030.1	TSP1_ADAMTS	Domain	1	55	55	40.3	2.9e-10	1	CL0692	sp|P59510|ATS20_HUMAN A disintegrin and metalloproteinase with thrombospondin motifs 20 OS=Homo sapiens OX=9606 GN=ADAMTS20 PE=2 SV=2
1457	P59510	1080	1134	1080	1134	PF19030.1	TSP1_ADAMTS	Domain	1	55	55	54.9	7.8e-15	1	CL0692	sp|P59510|ATS20_HUMAN A disintegrin and metalloproteinase with thrombospondin motifs 20 OS=Homo sapiens OX=9606 GN=ADAMTS20 PE=2 SV=2
1458	P59510	1156	1205	1156	1208	PF19030.1	TSP1_ADAMTS	Domain	1	51	55	41.5	1.2e-10	1	CL0692	sp|P59510|ATS20_HUMAN A disintegrin and metalloproteinase with thrombospondin motifs 20 OS=Homo sapiens OX=9606 GN=ADAMTS20 PE=2 SV=2
1459	P59510	1211	1263	1211	1263	PF19030.1	TSP1_ADAMTS	Domain	1	55	55	44.3	1.6e-11	1	CL0692	sp|P59510|ATS20_HUMAN A disintegrin and metalloproteinase with thrombospondin motifs 20 OS=Homo sapiens OX=9606 GN=ADAMTS20 PE=2 SV=2
1460	P59510	1308	1359	1308	1359	PF19030.1	TSP1_ADAMTS	Domain	1	55	55	45.3	7.6e-12	1	CL0692	sp|P59510|ATS20_HUMAN A disintegrin and metalloproteinase with thrombospondin motifs 20 OS=Homo sapiens OX=9606 GN=ADAMTS20 PE=2 SV=2
1461	P59510	1362	1415	1362	1415	PF19030.1	TSP1_ADAMTS	Domain	1	55	55	55.9	3.9e-15	1	CL0692	sp|P59510|ATS20_HUMAN A disintegrin and metalloproteinase with thrombospondin motifs 20 OS=Homo sapiens OX=9606 GN=ADAMTS20 PE=2 SV=2
1462	P59510	1421	1474	1421	1474	PF19030.1	TSP1_ADAMTS	Domain	1	55	55	46.3	3.6e-12	1	CL0692	sp|P59510|ATS20_HUMAN A disintegrin and metalloproteinase with thrombospondin motifs 20 OS=Homo sapiens OX=9606 GN=ADAMTS20 PE=2 SV=2
1463	P59510	1477	1530	1477	1530	PF19030.1	TSP1_ADAMTS	Domain	1	55	55	38.6	9.6e-10	1	CL0692	sp|P59510|ATS20_HUMAN A disintegrin and metalloproteinase with thrombospondin motifs 20 OS=Homo sapiens OX=9606 GN=ADAMTS20 PE=2 SV=2
1464	P59510	1658	1709	1658	1709	PF19030.1	TSP1_ADAMTS	Domain	1	55	55	42.7	4.8e-11	1	CL0692	sp|P59510|ATS20_HUMAN A disintegrin and metalloproteinase with thrombospondin motifs 20 OS=Homo sapiens OX=9606 GN=ADAMTS20 PE=2 SV=2
1465	P59510	1713	1909	1712	1909	PF08685.12	GON	Domain	2	200	200	260.5	1.1e-77	1	No_clan	sp|P59510|ATS20_HUMAN A disintegrin and metalloproteinase with thrombospondin motifs 20 OS=Homo sapiens OX=9606 GN=ADAMTS20 PE=2 SV=2
1466	Q9Y219	28	103	27	103	PF07657.14	MNNL	Family	2	75	75	98.6	1.6e-28	1	CL0154	sp|Q9Y219|JAG2_HUMAN Protein jagged-2 OS=Homo sapiens OX=9606 GN=JAG2 PE=1 SV=3
1467	Q9Y219	178	240	178	240	PF01414.20	DSL	Domain	1	63	63	85.4	2.1e-24	1	CL0001	sp|Q9Y219|JAG2_HUMAN Protein jagged-2 OS=Homo sapiens OX=9606 GN=JAG2 PE=1 SV=3
1468	Q9Y219	311	343	311	343	PF00008.28	EGF	Domain	1	32	32	22.9	7.7e-05	1	CL0001	sp|Q9Y219|JAG2_HUMAN Protein jagged-2 OS=Homo sapiens OX=9606 GN=JAG2 PE=1 SV=3
1469	Q9Y219	351	381	351	381	PF00008.28	EGF	Domain	1	32	32	31.9	1.2e-07	1	CL0001	sp|Q9Y219|JAG2_HUMAN Protein jagged-2 OS=Homo sapiens OX=9606 GN=JAG2 PE=1 SV=3
1470	Q9Y219	389	418	389	419	PF00008.28	EGF	Domain	1	31	32	26.8	4.8e-06	1	CL0001	sp|Q9Y219|JAG2_HUMAN Protein jagged-2 OS=Homo sapiens OX=9606 GN=JAG2 PE=1 SV=3
1471	Q9Y219	423	456	423	465	PF07645.16	EGF_CA	Domain	1	35	42	22.3	0.00011	1	CL0001	sp|Q9Y219|JAG2_HUMAN Protein jagged-2 OS=Homo sapiens OX=9606 GN=JAG2 PE=1 SV=3
1472	Q9Y219	469	490	469	490	PF12661.8	hEGF	Domain	1	22	22	29.6	7.4e-07	1	CL0001	sp|Q9Y219|JAG2_HUMAN Protein jagged-2 OS=Homo sapiens OX=9606 GN=JAG2 PE=1 SV=3
1473	Q9Y219	502	531	502	532	PF00008.28	EGF	Domain	1	31	32	29.1	9.2e-07	1	CL0001	sp|Q9Y219|JAG2_HUMAN Protein jagged-2 OS=Homo sapiens OX=9606 GN=JAG2 PE=1 SV=3
1474	Q9Y219	606	628	606	628	PF12661.8	hEGF	Domain	1	22	22	13.8	0.072	1	CL0001	sp|Q9Y219|JAG2_HUMAN Protein jagged-2 OS=Homo sapiens OX=9606 GN=JAG2 PE=1 SV=3
1475	Q9Y219	640	669	640	670	PF00008.28	EGF	Domain	1	31	32	32.7	6.8e-08	1	CL0001	sp|Q9Y219|JAG2_HUMAN Protein jagged-2 OS=Homo sapiens OX=9606 GN=JAG2 PE=1 SV=3
1476	Q9Y219	678	708	678	708	PF00008.28	EGF	Domain	1	32	32	26.4	6.2e-06	1	CL0001	sp|Q9Y219|JAG2_HUMAN Protein jagged-2 OS=Homo sapiens OX=9606 GN=JAG2 PE=1 SV=3
1477	Q9Y219	716	746	716	746	PF00008.28	EGF	Domain	1	32	32	29.3	7.6e-07	1	CL0001	sp|Q9Y219|JAG2_HUMAN Protein jagged-2 OS=Homo sapiens OX=9606 GN=JAG2 PE=1 SV=3
1478	Q9Y219	755	785	755	785	PF00008.28	EGF	Domain	1	32	32	25.8	1e-05	1	CL0001	sp|Q9Y219|JAG2_HUMAN Protein jagged-2 OS=Homo sapiens OX=9606 GN=JAG2 PE=1 SV=3
1479	Q9Y219	793	822	793	823	PF00008.28	EGF	Domain	1	31	32	31	2.2e-07	1	CL0001	sp|Q9Y219|JAG2_HUMAN Protein jagged-2 OS=Homo sapiens OX=9606 GN=JAG2 PE=1 SV=3
1480	Q9Y219	831	861	831	861	PF00008.28	EGF	Domain	1	32	32	27.1	3.8e-06	1	CL0001	sp|Q9Y219|JAG2_HUMAN Protein jagged-2 OS=Homo sapiens OX=9606 GN=JAG2 PE=1 SV=3
1481	Q9NZV1	37	90	37	90	PF00219.19	IGFBP	Domain	1	55	55	31.1	2.8e-07	1	CL0547	sp|Q9NZV1|CRIM1_HUMAN Cysteine-rich motor neuron 1 protein OS=Homo sapiens OX=9606 GN=CRIM1 PE=1 SV=1
1482	Q9NZV1	336	390	336	390	PF00093.19	VWC	Family	1	57	57	30.4	3.8e-07	1	CL0451	sp|Q9NZV1|CRIM1_HUMAN Cysteine-rich motor neuron 1 protein OS=Homo sapiens OX=9606 GN=CRIM1 PE=1 SV=1
1483	Q9NZV1	403	456	403	456	PF00093.19	VWC	Family	1	57	57	31.3	1.9e-07	1	CL0451	sp|Q9NZV1|CRIM1_HUMAN Cysteine-rich motor neuron 1 protein OS=Homo sapiens OX=9606 GN=CRIM1 PE=1 SV=1
1484	Q9NZV1	469	498	469	498	PF02822.15	Antistasin	Domain	1	25	25	24.9	2.3e-05	1	CL0620	sp|Q9NZV1|CRIM1_HUMAN Cysteine-rich motor neuron 1 protein OS=Homo sapiens OX=9606 GN=CRIM1 PE=1 SV=1
1485	Q9NZV1	505	532	505	532	PF02822.15	Antistasin	Domain	1	25	25	29.3	9.7e-07	1	CL0620	sp|Q9NZV1|CRIM1_HUMAN Cysteine-rich motor neuron 1 protein OS=Homo sapiens OX=9606 GN=CRIM1 PE=1 SV=1
1486	Q9NZV1	539	564	539	564	PF02822.15	Antistasin	Domain	1	25	25	23.6	5.9e-05	1	CL0620	sp|Q9NZV1|CRIM1_HUMAN Cysteine-rich motor neuron 1 protein OS=Homo sapiens OX=9606 GN=CRIM1 PE=1 SV=1
1487	Q9NZV1	567	592	567	592	PF02822.15	Antistasin	Domain	1	25	25	33	6.9e-08	1	CL0620	sp|Q9NZV1|CRIM1_HUMAN Cysteine-rich motor neuron 1 protein OS=Homo sapiens OX=9606 GN=CRIM1 PE=1 SV=1
1488	Q9NZV1	611	662	608	662	PF00093.19	VWC	Family	3	57	57	30.4	3.7e-07	1	CL0451	sp|Q9NZV1|CRIM1_HUMAN Cysteine-rich motor neuron 1 protein OS=Homo sapiens OX=9606 GN=CRIM1 PE=1 SV=1
1489	Q9NZV1	684	734	679	734	PF00093.19	VWC	Family	5	57	57	38.4	1.1e-09	1	CL0451	sp|Q9NZV1|CRIM1_HUMAN Cysteine-rich motor neuron 1 protein OS=Homo sapiens OX=9606 GN=CRIM1 PE=1 SV=1
1490	Q9NZV1	757	808	753	808	PF00093.19	VWC	Family	4	57	57	33.1	5.1e-08	1	CL0451	sp|Q9NZV1|CRIM1_HUMAN Cysteine-rich motor neuron 1 protein OS=Homo sapiens OX=9606 GN=CRIM1 PE=1 SV=1
1491	Q9NZV1	819	873	819	873	PF00093.19	VWC	Family	1	57	57	40.1	3.4e-10	1	CL0451	sp|Q9NZV1|CRIM1_HUMAN Cysteine-rich motor neuron 1 protein OS=Homo sapiens OX=9606 GN=CRIM1 PE=1 SV=1
1492	A4D0S4	28	263	28	263	PF00055.18	Laminin_N	Family	1	233	233	243.9	1.6e-72	1	CL0202	sp|A4D0S4|LAMB4_HUMAN Laminin subunit beta-4 OS=Homo sapiens OX=9606 GN=LAMB4 PE=2 SV=1
1493	A4D0S4	265	320	265	329	PF00053.25	Laminin_EGF	Domain	1	45	49	31.4	1.6e-07	1	CL0001	sp|A4D0S4|LAMB4_HUMAN Laminin subunit beta-4 OS=Homo sapiens OX=9606 GN=LAMB4 PE=2 SV=1
1494	A4D0S4	332	383	332	392	PF00053.25	Laminin_EGF	Domain	1	43	49	37.6	1.8e-09	1	CL0001	sp|A4D0S4|LAMB4_HUMAN Laminin subunit beta-4 OS=Homo sapiens OX=9606 GN=LAMB4 PE=2 SV=1
1495	A4D0S4	395	452	395	452	PF00053.25	Laminin_EGF	Domain	1	49	49	41.3	1.2e-10	1	CL0001	sp|A4D0S4|LAMB4_HUMAN Laminin subunit beta-4 OS=Homo sapiens OX=9606 GN=LAMB4 PE=2 SV=1
1496	A4D0S4	455	503	455	503	PF00053.25	Laminin_EGF	Domain	1	49	49	40.3	2.5e-10	1	CL0001	sp|A4D0S4|LAMB4_HUMAN Laminin subunit beta-4 OS=Homo sapiens OX=9606 GN=LAMB4 PE=2 SV=1
1497	A4D0S4	506	544	506	551	PF00053.25	Laminin_EGF	Domain	1	39	49	33.2	4.3e-08	1	CL0001	sp|A4D0S4|LAMB4_HUMAN Laminin subunit beta-4 OS=Homo sapiens OX=9606 GN=LAMB4 PE=2 SV=1
1498	A4D0S4	769	814	769	814	PF00053.25	Laminin_EGF	Domain	1	49	49	30	4.3e-07	1	CL0001	sp|A4D0S4|LAMB4_HUMAN Laminin subunit beta-4 OS=Homo sapiens OX=9606 GN=LAMB4 PE=2 SV=1
1499	A4D0S4	817	865	817	865	PF00053.25	Laminin_EGF	Domain	1	49	49	43.7	2.2e-11	1	CL0001	sp|A4D0S4|LAMB4_HUMAN Laminin subunit beta-4 OS=Homo sapiens OX=9606 GN=LAMB4 PE=2 SV=1
1500	A4D0S4	911	967	911	967	PF00053.25	Laminin_EGF	Domain	1	49	49	24.7	1.9e-05	1	CL0001	sp|A4D0S4|LAMB4_HUMAN Laminin subunit beta-4 OS=Homo sapiens OX=9606 GN=LAMB4 PE=2 SV=1
1501	A4D0S4	970	1019	970	1019	PF00053.25	Laminin_EGF	Domain	1	49	49	33.5	3.4e-08	1	CL0001	sp|A4D0S4|LAMB4_HUMAN Laminin subunit beta-4 OS=Homo sapiens OX=9606 GN=LAMB4 PE=2 SV=1
1502	A4D0S4	1022	1077	1022	1077	PF00053.25	Laminin_EGF	Domain	1	49	49	34.6	1.6e-08	1	CL0001	sp|A4D0S4|LAMB4_HUMAN Laminin subunit beta-4 OS=Homo sapiens OX=9606 GN=LAMB4 PE=2 SV=1
1503	A4D0S4	1080	1121	1080	1125	PF00053.25	Laminin_EGF	Domain	1	45	49	39.5	4.6e-10	1	CL0001	sp|A4D0S4|LAMB4_HUMAN Laminin subunit beta-4 OS=Homo sapiens OX=9606 GN=LAMB4 PE=2 SV=1
1504	A4D0S4	1128	1168	1128	1178	PF00053.25	Laminin_EGF	Domain	1	41	49	30.5	3e-07	1	CL0001	sp|A4D0S4|LAMB4_HUMAN Laminin subunit beta-4 OS=Homo sapiens OX=9606 GN=LAMB4 PE=2 SV=1
1505	Q9P2N4	49	207	49	207	PF01562.20	Pep_M12B_propep	Family	1	140	140	131.7	2.2e-38	1	No_clan	sp|Q9P2N4|ATS9_HUMAN A disintegrin and metalloproteinase with thrombospondin motifs 9 OS=Homo sapiens OX=9606 GN=ADAMTS9 PE=1 SV=4
1506	Q9P2N4	293	499	293	499	PF01421.20	Reprolysin	Domain	1	200	200	96.8	1.6e-27	1	CL0126	sp|Q9P2N4|ATS9_HUMAN A disintegrin and metalloproteinase with thrombospondin motifs 9 OS=Homo sapiens OX=9606 GN=ADAMTS9 PE=1 SV=4
1507	Q9P2N4	511	578	511	578	PF17771.2	ADAM_CR_2	Domain	1	70	70	62.1	5.2e-17	1	No_clan	sp|Q9P2N4|ATS9_HUMAN A disintegrin and metalloproteinase with thrombospondin motifs 9 OS=Homo sapiens OX=9606 GN=ADAMTS9 PE=1 SV=4
1508	Q9P2N4	593	642	591	642	PF00090.20	TSP_1	Domain	2	49	49	29.5	6.4e-07	1	CL0692	sp|Q9P2N4|ATS9_HUMAN A disintegrin and metalloproteinase with thrombospondin motifs 9 OS=Homo sapiens OX=9606 GN=ADAMTS9 PE=1 SV=4
1509	Q9P2N4	753	871	753	871	PF05986.15	ADAM_spacer1	Family	1	114	114	112.4	1.1e-32	1	No_clan	sp|Q9P2N4|ATS9_HUMAN A disintegrin and metalloproteinase with thrombospondin motifs 9 OS=Homo sapiens OX=9606 GN=ADAMTS9 PE=1 SV=4
1510	Q9P2N4	939	993	939	996	PF19030.1	TSP1_ADAMTS	Domain	1	51	55	26.9	4.4e-06	1	CL0692	sp|Q9P2N4|ATS9_HUMAN A disintegrin and metalloproteinase with thrombospondin motifs 9 OS=Homo sapiens OX=9606 GN=ADAMTS9 PE=1 SV=4
1511	Q9P2N4	1001	1053	1001	1053	PF19030.1	TSP1_ADAMTS	Domain	1	55	55	37	3.1e-09	1	CL0692	sp|Q9P2N4|ATS9_HUMAN A disintegrin and metalloproteinase with thrombospondin motifs 9 OS=Homo sapiens OX=9606 GN=ADAMTS9 PE=1 SV=4
1512	Q9P2N4	1056	1108	1056	1108	PF19030.1	TSP1_ADAMTS	Domain	1	55	55	42.4	6.2e-11	1	CL0692	sp|Q9P2N4|ATS9_HUMAN A disintegrin and metalloproteinase with thrombospondin motifs 9 OS=Homo sapiens OX=9606 GN=ADAMTS9 PE=1 SV=4
1513	Q9P2N4	1111	1165	1111	1165	PF19030.1	TSP1_ADAMTS	Domain	1	55	55	60.6	1.3e-16	1	CL0692	sp|Q9P2N4|ATS9_HUMAN A disintegrin and metalloproteinase with thrombospondin motifs 9 OS=Homo sapiens OX=9606 GN=ADAMTS9 PE=1 SV=4
1514	Q9P2N4	1186	1239	1186	1239	PF19030.1	TSP1_ADAMTS	Domain	1	55	55	46.2	4e-12	1	CL0692	sp|Q9P2N4|ATS9_HUMAN A disintegrin and metalloproteinase with thrombospondin motifs 9 OS=Homo sapiens OX=9606 GN=ADAMTS9 PE=1 SV=4
1515	Q9P2N4	1242	1295	1242	1295	PF19030.1	TSP1_ADAMTS	Domain	1	55	55	48	1.1e-12	1	CL0692	sp|Q9P2N4|ATS9_HUMAN A disintegrin and metalloproteinase with thrombospondin motifs 9 OS=Homo sapiens OX=9606 GN=ADAMTS9 PE=1 SV=4
1516	Q9P2N4	1332	1383	1332	1383	PF19030.1	TSP1_ADAMTS	Domain	1	55	55	42.5	5.7e-11	1	CL0692	sp|Q9P2N4|ATS9_HUMAN A disintegrin and metalloproteinase with thrombospondin motifs 9 OS=Homo sapiens OX=9606 GN=ADAMTS9 PE=1 SV=4
1517	Q9P2N4	1386	1439	1386	1439	PF19030.1	TSP1_ADAMTS	Domain	1	55	55	54.1	1.4e-14	1	CL0692	sp|Q9P2N4|ATS9_HUMAN A disintegrin and metalloproteinase with thrombospondin motifs 9 OS=Homo sapiens OX=9606 GN=ADAMTS9 PE=1 SV=4
1518	Q9P2N4	1445	1498	1445	1498	PF19030.1	TSP1_ADAMTS	Domain	1	55	55	45.3	7.7e-12	1	CL0692	sp|Q9P2N4|ATS9_HUMAN A disintegrin and metalloproteinase with thrombospondin motifs 9 OS=Homo sapiens OX=9606 GN=ADAMTS9 PE=1 SV=4
1519	Q9P2N4	1501	1554	1501	1554	PF19030.1	TSP1_ADAMTS	Domain	1	55	55	45.3	7.9e-12	1	CL0692	sp|Q9P2N4|ATS9_HUMAN A disintegrin and metalloproteinase with thrombospondin motifs 9 OS=Homo sapiens OX=9606 GN=ADAMTS9 PE=1 SV=4
1520	Q9P2N4	1559	1612	1559	1612	PF19030.1	TSP1_ADAMTS	Domain	1	55	55	48.5	8e-13	1	CL0692	sp|Q9P2N4|ATS9_HUMAN A disintegrin and metalloproteinase with thrombospondin motifs 9 OS=Homo sapiens OX=9606 GN=ADAMTS9 PE=1 SV=4
1521	Q9P2N4	1616	1675	1616	1675	PF19030.1	TSP1_ADAMTS	Domain	1	55	55	41.3	1.4e-10	1	CL0692	sp|Q9P2N4|ATS9_HUMAN A disintegrin and metalloproteinase with thrombospondin motifs 9 OS=Homo sapiens OX=9606 GN=ADAMTS9 PE=1 SV=4
1522	Q9P2N4	1681	1732	1681	1733	PF19030.1	TSP1_ADAMTS	Domain	1	54	55	40.8	2e-10	1	CL0692	sp|Q9P2N4|ATS9_HUMAN A disintegrin and metalloproteinase with thrombospondin motifs 9 OS=Homo sapiens OX=9606 GN=ADAMTS9 PE=1 SV=4
1523	Q9P2N4	1736	1934	1736	1934	PF08685.12	GON	Domain	1	200	200	276.9	1e-82	1	No_clan	sp|Q9P2N4|ATS9_HUMAN A disintegrin and metalloproteinase with thrombospondin motifs 9 OS=Homo sapiens OX=9606 GN=ADAMTS9 PE=1 SV=4
1524	P07942	35	269	35	269	PF00055.18	Laminin_N	Family	1	233	233	268.8	3.9e-80	1	CL0202	sp|P07942|LAMB1_HUMAN Laminin subunit beta-1 OS=Homo sapiens OX=9606 GN=LAMB1 PE=1 SV=2
1525	P07942	271	324	271	332	PF00053.25	Laminin_EGF	Domain	1	46	49	24.9	1.6e-05	1	CL0001	sp|P07942|LAMB1_HUMAN Laminin subunit beta-1 OS=Homo sapiens OX=9606 GN=LAMB1 PE=1 SV=2
1526	P07942	335	391	335	395	PF00053.25	Laminin_EGF	Domain	1	45	49	37	2.8e-09	1	CL0001	sp|P07942|LAMB1_HUMAN Laminin subunit beta-1 OS=Homo sapiens OX=9606 GN=LAMB1 PE=1 SV=2
1527	P07942	398	455	398	455	PF00053.25	Laminin_EGF	Domain	1	49	49	42.2	6.8e-11	1	CL0001	sp|P07942|LAMB1_HUMAN Laminin subunit beta-1 OS=Homo sapiens OX=9606 GN=LAMB1 PE=1 SV=2
1528	P07942	458	507	458	507	PF00053.25	Laminin_EGF	Domain	1	49	49	39.8	3.6e-10	1	CL0001	sp|P07942|LAMB1_HUMAN Laminin subunit beta-1 OS=Homo sapiens OX=9606 GN=LAMB1 PE=1 SV=2
1529	P07942	510	548	510	555	PF00053.25	Laminin_EGF	Domain	1	39	49	33.5	3.5e-08	1	CL0001	sp|P07942|LAMB1_HUMAN Laminin subunit beta-1 OS=Homo sapiens OX=9606 GN=LAMB1 PE=1 SV=2
1530	P07942	773	818	773	818	PF00053.25	Laminin_EGF	Domain	1	49	49	44.2	1.5e-11	1	CL0001	sp|P07942|LAMB1_HUMAN Laminin subunit beta-1 OS=Homo sapiens OX=9606 GN=LAMB1 PE=1 SV=2
1531	P07942	821	865	821	866	PF00053.25	Laminin_EGF	Domain	1	45	49	41.4	1.2e-10	1	CL0001	sp|P07942|LAMB1_HUMAN Laminin subunit beta-1 OS=Homo sapiens OX=9606 GN=LAMB1 PE=1 SV=2
1532	P07942	867	914	867	914	PF00053.25	Laminin_EGF	Domain	1	49	49	36.9	2.9e-09	1	CL0001	sp|P07942|LAMB1_HUMAN Laminin subunit beta-1 OS=Homo sapiens OX=9606 GN=LAMB1 PE=1 SV=2
1533	P07942	917	973	917	973	PF00053.25	Laminin_EGF	Domain	1	49	49	27.5	2.5e-06	1	CL0001	sp|P07942|LAMB1_HUMAN Laminin subunit beta-1 OS=Homo sapiens OX=9606 GN=LAMB1 PE=1 SV=2
1534	P07942	976	1025	976	1025	PF00053.25	Laminin_EGF	Domain	1	49	49	30.7	2.5e-07	1	CL0001	sp|P07942|LAMB1_HUMAN Laminin subunit beta-1 OS=Homo sapiens OX=9606 GN=LAMB1 PE=1 SV=2
1535	P07942	1028	1081	1028	1081	PF00053.25	Laminin_EGF	Domain	1	49	49	31.5	1.4e-07	1	CL0001	sp|P07942|LAMB1_HUMAN Laminin subunit beta-1 OS=Homo sapiens OX=9606 GN=LAMB1 PE=1 SV=2
1536	P07942	1084	1126	1084	1131	PF00053.25	Laminin_EGF	Domain	1	43	49	37.3	2.3e-09	1	CL0001	sp|P07942|LAMB1_HUMAN Laminin subunit beta-1 OS=Homo sapiens OX=9606 GN=LAMB1 PE=1 SV=2
1537	P07942	1132	1172	1132	1182	PF00053.25	Laminin_EGF	Domain	1	41	49	32.8	5.8e-08	1	CL0001	sp|P07942|LAMB1_HUMAN Laminin subunit beta-1 OS=Homo sapiens OX=9606 GN=LAMB1 PE=1 SV=2
1538	Q9NS15	291	322	289	327	PF00683.18	TB	Family	3	33	45	26.5	4.2e-06	1	No_clan	sp|Q9NS15|LTBP3_HUMAN Latent-transforming growth factor beta-binding protein 3 OS=Homo sapiens OX=9606 GN=LTBP3 PE=1 SV=4
1539	Q9NS15	355	394	355	394	PF07645.16	EGF_CA	Domain	1	42	42	36.5	4e-09	1	CL0001	sp|Q9NS15|LTBP3_HUMAN Latent-transforming growth factor beta-binding protein 3 OS=Homo sapiens OX=9606 GN=LTBP3 PE=1 SV=4
1540	Q9NS15	414	458	414	458	PF00683.18	TB	Family	1	45	45	59.6	1.8e-16	1	No_clan	sp|Q9NS15|LTBP3_HUMAN Latent-transforming growth factor beta-binding protein 3 OS=Homo sapiens OX=9606 GN=LTBP3 PE=1 SV=4
1541	Q9NS15	616	658	616	658	PF07645.16	EGF_CA	Domain	1	42	42	32.9	5.6e-08	1	CL0001	sp|Q9NS15|LTBP3_HUMAN Latent-transforming growth factor beta-binding protein 3 OS=Homo sapiens OX=9606 GN=LTBP3 PE=1 SV=4
1542	Q9NS15	660	694	660	701	PF07645.16	EGF_CA	Domain	1	36	42	30.8	2.5e-07	1	CL0001	sp|Q9NS15|LTBP3_HUMAN Latent-transforming growth factor beta-binding protein 3 OS=Homo sapiens OX=9606 GN=LTBP3 PE=1 SV=4
1543	Q9NS15	703	742	703	742	PF07645.16	EGF_CA	Domain	1	42	42	34.3	2e-08	1	CL0001	sp|Q9NS15|LTBP3_HUMAN Latent-transforming growth factor beta-binding protein 3 OS=Homo sapiens OX=9606 GN=LTBP3 PE=1 SV=4
1544	Q9NS15	765	788	765	788	PF12662.8	cEGF	Domain	1	24	24	37.4	1.8e-09	1	CL0001	sp|Q9NS15|LTBP3_HUMAN Latent-transforming growth factor beta-binding protein 3 OS=Homo sapiens OX=9606 GN=LTBP3 PE=1 SV=4
1545	Q9NS15	806	829	806	829	PF12662.8	cEGF	Domain	1	24	24	32	8.8e-08	1	CL0001	sp|Q9NS15|LTBP3_HUMAN Latent-transforming growth factor beta-binding protein 3 OS=Homo sapiens OX=9606 GN=LTBP3 PE=1 SV=4
1546	Q9NS15	866	907	866	907	PF07645.16	EGF_CA	Domain	1	42	42	35.8	7.1e-09	1	CL0001	sp|Q9NS15|LTBP3_HUMAN Latent-transforming growth factor beta-binding protein 3 OS=Homo sapiens OX=9606 GN=LTBP3 PE=1 SV=4
1547	Q9NS15	929	974	928	974	PF00683.18	TB	Family	2	45	45	54.7	6.4e-15	1	No_clan	sp|Q9NS15|LTBP3_HUMAN Latent-transforming growth factor beta-binding protein 3 OS=Homo sapiens OX=9606 GN=LTBP3 PE=1 SV=4
1548	Q9NS15	993	1026	993	1034	PF07645.16	EGF_CA	Domain	1	34	42	25.3	1.4e-05	1	CL0001	sp|Q9NS15|LTBP3_HUMAN Latent-transforming growth factor beta-binding protein 3 OS=Homo sapiens OX=9606 GN=LTBP3 PE=1 SV=4
1549	Q9NS15	1036	1075	1036	1075	PF07645.16	EGF_CA	Domain	1	42	42	27.7	2.3e-06	1	CL0001	sp|Q9NS15|LTBP3_HUMAN Latent-transforming growth factor beta-binding protein 3 OS=Homo sapiens OX=9606 GN=LTBP3 PE=1 SV=4
1550	Q9NS15	1082	1121	1082	1121	PF07645.16	EGF_CA	Domain	1	42	42	34.2	2.2e-08	1	CL0001	sp|Q9NS15|LTBP3_HUMAN Latent-transforming growth factor beta-binding protein 3 OS=Homo sapiens OX=9606 GN=LTBP3 PE=1 SV=4
1551	Q9NS15	1147	1182	1147	1189	PF00683.18	TB	Family	1	35	45	34.9	9.6e-09	1	No_clan	sp|Q9NS15|LTBP3_HUMAN Latent-transforming growth factor beta-binding protein 3 OS=Homo sapiens OX=9606 GN=LTBP3 PE=1 SV=4
1552	Q9NS15	1254	1297	1254	1297	PF07645.16	EGF_CA	Domain	1	42	42	35.1	1.1e-08	1	CL0001	sp|Q9NS15|LTBP3_HUMAN Latent-transforming growth factor beta-binding protein 3 OS=Homo sapiens OX=9606 GN=LTBP3 PE=1 SV=4
1553	P55268	47	281	47	281	PF00055.18	Laminin_N	Family	1	233	233	255.2	5.6e-76	1	CL0202	sp|P55268|LAMB2_HUMAN Laminin subunit beta-2 OS=Homo sapiens OX=9606 GN=LAMB2 PE=1 SV=2
1554	P55268	283	336	283	344	PF00053.25	Laminin_EGF	Domain	1	46	49	26.6	4.8e-06	1	CL0001	sp|P55268|LAMB2_HUMAN Laminin subunit beta-2 OS=Homo sapiens OX=9606 GN=LAMB2 PE=1 SV=2
1555	P55268	347	402	347	407	PF00053.25	Laminin_EGF	Domain	1	44	49	35.5	8.5e-09	1	CL0001	sp|P55268|LAMB2_HUMAN Laminin subunit beta-2 OS=Homo sapiens OX=9606 GN=LAMB2 PE=1 SV=2
1556	P55268	410	467	410	467	PF00053.25	Laminin_EGF	Domain	1	49	49	39.3	5.5e-10	1	CL0001	sp|P55268|LAMB2_HUMAN Laminin subunit beta-2 OS=Homo sapiens OX=9606 GN=LAMB2 PE=1 SV=2
1557	P55268	470	516	470	519	PF00053.25	Laminin_EGF	Domain	1	45	49	37	2.9e-09	1	CL0001	sp|P55268|LAMB2_HUMAN Laminin subunit beta-2 OS=Homo sapiens OX=9606 GN=LAMB2 PE=1 SV=2
1558	P55268	522	561	522	565	PF00053.25	Laminin_EGF	Domain	1	40	49	36.2	5e-09	1	CL0001	sp|P55268|LAMB2_HUMAN Laminin subunit beta-2 OS=Homo sapiens OX=9606 GN=LAMB2 PE=1 SV=2
1559	P55268	783	828	783	828	PF00053.25	Laminin_EGF	Domain	1	49	49	48.3	8e-13	1	CL0001	sp|P55268|LAMB2_HUMAN Laminin subunit beta-2 OS=Homo sapiens OX=9606 GN=LAMB2 PE=1 SV=2
1560	P55268	831	874	831	876	PF00053.25	Laminin_EGF	Domain	1	44	49	35.1	1.1e-08	1	CL0001	sp|P55268|LAMB2_HUMAN Laminin subunit beta-2 OS=Homo sapiens OX=9606 GN=LAMB2 PE=1 SV=2
1561	P55268	877	924	877	924	PF00053.25	Laminin_EGF	Domain	1	49	49	31.6	1.4e-07	1	CL0001	sp|P55268|LAMB2_HUMAN Laminin subunit beta-2 OS=Homo sapiens OX=9606 GN=LAMB2 PE=1 SV=2
1562	P55268	927	983	927	983	PF00053.25	Laminin_EGF	Domain	1	49	49	27.7	2.3e-06	1	CL0001	sp|P55268|LAMB2_HUMAN Laminin subunit beta-2 OS=Homo sapiens OX=9606 GN=LAMB2 PE=1 SV=2
1563	P55268	986	1035	986	1035	PF00053.25	Laminin_EGF	Domain	1	49	49	34.1	2.2e-08	1	CL0001	sp|P55268|LAMB2_HUMAN Laminin subunit beta-2 OS=Homo sapiens OX=9606 GN=LAMB2 PE=1 SV=2
1564	P55268	1038	1092	1038	1092	PF00053.25	Laminin_EGF	Domain	1	49	49	33.5	3.3e-08	1	CL0001	sp|P55268|LAMB2_HUMAN Laminin subunit beta-2 OS=Homo sapiens OX=9606 GN=LAMB2 PE=1 SV=2
1565	P55268	1095	1136	1095	1141	PF00053.25	Laminin_EGF	Domain	1	42	49	33.6	3.2e-08	1	CL0001	sp|P55268|LAMB2_HUMAN Laminin subunit beta-2 OS=Homo sapiens OX=9606 GN=LAMB2 PE=1 SV=2
1566	P55268	1143	1183	1143	1193	PF00053.25	Laminin_EGF	Domain	1	41	49	31.7	1.3e-07	1	CL0001	sp|P55268|LAMB2_HUMAN Laminin subunit beta-2 OS=Homo sapiens OX=9606 GN=LAMB2 PE=1 SV=2
1567	Q5VY43	319	365	319	365	PF00053.25	Laminin_EGF	Domain	1	49	49	19.3	0.00094	1	CL0001	sp|Q5VY43|PEAR1_HUMAN Platelet endothelial aggregation receptor 1 OS=Homo sapiens OX=9606 GN=PEAR1 PE=1 SV=1
1568	Q5VY43	537	582	537	582	PF00053.25	Laminin_EGF	Domain	1	49	49	14.9	0.022	1	CL0001	sp|Q5VY43|PEAR1_HUMAN Platelet endothelial aggregation receptor 1 OS=Homo sapiens OX=9606 GN=PEAR1 PE=1 SV=1
1569	Q5VY43	622	665	622	667	PF00053.25	Laminin_EGF	Domain	1	47	49	18	0.0024	1	CL0001	sp|Q5VY43|PEAR1_HUMAN Platelet endothelial aggregation receptor 1 OS=Homo sapiens OX=9606 GN=PEAR1 PE=1 SV=1
1570	P82279	74	104	74	105	PF00008.28	EGF	Domain	1	30	32	29.1	9.2e-07	1	CL0001	sp|P82279|CRUM1_HUMAN Protein crumbs homolog 1 OS=Homo sapiens OX=9606 GN=CRB1 PE=1 SV=2
1571	P82279	119	140	119	140	PF12661.8	hEGF	Domain	1	22	22	18.2	0.0029	1	CL0001	sp|P82279|CRUM1_HUMAN Protein crumbs homolog 1 OS=Homo sapiens OX=9606 GN=CRB1 PE=1 SV=2
1572	P82279	152	182	152	182	PF00008.28	EGF	Domain	1	32	32	31	2.3e-07	1	CL0001	sp|P82279|CRUM1_HUMAN Protein crumbs homolog 1 OS=Homo sapiens OX=9606 GN=CRB1 PE=1 SV=2
1573	P82279	190	219	190	220	PF00008.28	EGF	Domain	1	31	32	32.2	1e-07	1	CL0001	sp|P82279|CRUM1_HUMAN Protein crumbs homolog 1 OS=Homo sapiens OX=9606 GN=CRB1 PE=1 SV=2
1574	P82279	233	254	233	254	PF12661.8	hEGF	Domain	1	22	22	27.5	3.4e-06	1	CL0001	sp|P82279|CRUM1_HUMAN Protein crumbs homolog 1 OS=Homo sapiens OX=9606 GN=CRB1 PE=1 SV=2
1575	P82279	266	296	266	297	PF00008.28	EGF	Domain	1	31	32	28.1	1.8e-06	1	CL0001	sp|P82279|CRUM1_HUMAN Protein crumbs homolog 1 OS=Homo sapiens OX=9606 GN=CRB1 PE=1 SV=2
1576	P82279	307	334	305	335	PF00008.28	EGF	Domain	3	31	32	25.2	1.5e-05	1	CL0001	sp|P82279|CRUM1_HUMAN Protein crumbs homolog 1 OS=Homo sapiens OX=9606 GN=CRB1 PE=1 SV=2
1577	P82279	343	393	343	393	PF00008.28	EGF	Domain	1	32	32	24.2	3.1e-05	1	CL0001	sp|P82279|CRUM1_HUMAN Protein crumbs homolog 1 OS=Homo sapiens OX=9606 GN=CRB1 PE=1 SV=2
1578	P82279	401	424	401	434	PF00008.28	EGF	Domain	1	25	32	29.3	7.9e-07	1	CL0001	sp|P82279|CRUM1_HUMAN Protein crumbs homolog 1 OS=Homo sapiens OX=9606 GN=CRB1 PE=1 SV=2
1579	P82279	445	478	445	479	PF00008.28	EGF	Domain	1	31	32	25.6	1.1e-05	1	CL0001	sp|P82279|CRUM1_HUMAN Protein crumbs homolog 1 OS=Homo sapiens OX=9606 GN=CRB1 PE=1 SV=2
1580	P82279	514	649	514	651	PF02210.25	Laminin_G_2	Domain	1	124	126	65.6	6.4e-18	1	CL0004	sp|P82279|CRUM1_HUMAN Protein crumbs homolog 1 OS=Homo sapiens OX=9606 GN=CRB1 PE=1 SV=2
1581	P82279	676	706	676	706	PF00008.28	EGF	Domain	1	32	32	26.1	8e-06	1	CL0001	sp|P82279|CRUM1_HUMAN Protein crumbs homolog 1 OS=Homo sapiens OX=9606 GN=CRB1 PE=1 SV=2
1582	P82279	744	860	743	860	PF02210.25	Laminin_G_2	Domain	2	126	126	50.9	2.3e-13	1	CL0004	sp|P82279|CRUM1_HUMAN Protein crumbs homolog 1 OS=Homo sapiens OX=9606 GN=CRB1 PE=1 SV=2
1583	P82279	891	916	891	920	PF00008.28	EGF	Domain	1	27	32	24.6	2.3e-05	1	CL0001	sp|P82279|CRUM1_HUMAN Protein crumbs homolog 1 OS=Homo sapiens OX=9606 GN=CRB1 PE=1 SV=2
1584	P82279	980	1104	980	1105	PF02210.25	Laminin_G_2	Domain	1	125	126	52.5	7.4e-14	1	CL0004	sp|P82279|CRUM1_HUMAN Protein crumbs homolog 1 OS=Homo sapiens OX=9606 GN=CRB1 PE=1 SV=2
1585	P82279	1143	1173	1143	1173	PF00008.28	EGF	Domain	1	32	32	31.2	2e-07	1	CL0001	sp|P82279|CRUM1_HUMAN Protein crumbs homolog 1 OS=Homo sapiens OX=9606 GN=CRB1 PE=1 SV=2
1586	P82279	1181	1209	1181	1210	PF00008.28	EGF	Domain	1	31	32	22.6	9.7e-05	1	CL0001	sp|P82279|CRUM1_HUMAN Protein crumbs homolog 1 OS=Homo sapiens OX=9606 GN=CRB1 PE=1 SV=2
1587	P82279	1223	1240	1223	1240	PF12661.8	hEGF	Domain	1	18	22	16.2	0.013	1	CL0001	sp|P82279|CRUM1_HUMAN Protein crumbs homolog 1 OS=Homo sapiens OX=9606 GN=CRB1 PE=1 SV=2
1588	P82279	1301	1331	1301	1331	PF00008.28	EGF	Domain	1	32	32	22.2	0.00013	1	CL0001	sp|P82279|CRUM1_HUMAN Protein crumbs homolog 1 OS=Homo sapiens OX=9606 GN=CRB1 PE=1 SV=2
1589	P01266	45	92	34	92	PF00086.19	Thyroglobulin_1	Domain	20	67	67	42.8	3e-11	1	No_clan	sp|P01266|THYG_HUMAN Thyroglobulin OS=Homo sapiens OX=9606 GN=TG PE=1 SV=5
1590	P01266	96	160	96	160	PF00086.19	Thyroglobulin_1	Domain	1	67	67	52.4	3e-14	1	No_clan	sp|P01266|THYG_HUMAN Thyroglobulin OS=Homo sapiens OX=9606 GN=TG PE=1 SV=5
1591	P01266	181	248	169	251	PF00086.19	Thyroglobulin_1	Domain	25	58	67	25.4	8e-06	1	No_clan	sp|P01266|THYG_HUMAN Thyroglobulin OS=Homo sapiens OX=9606 GN=TG PE=1 SV=5
1592	P01266	312	358	301	358	PF00086.19	Thyroglobulin_1	Domain	20	67	67	46	3.1e-12	1	No_clan	sp|P01266|THYG_HUMAN Thyroglobulin OS=Homo sapiens OX=9606 GN=TG PE=1 SV=5
1593	P01266	604	658	597	658	PF00086.19	Thyroglobulin_1	Domain	10	67	67	56	2.3e-15	1	No_clan	sp|P01266|THYG_HUMAN Thyroglobulin OS=Homo sapiens OX=9606 GN=TG PE=1 SV=5
1594	P01266	662	724	662	726	PF00086.19	Thyroglobulin_1	Domain	1	66	67	53.3	1.6e-14	1	No_clan	sp|P01266|THYG_HUMAN Thyroglobulin OS=Homo sapiens OX=9606 GN=TG PE=1 SV=5
1595	P01266	753	797	730	801	PF00086.19	Thyroglobulin_1	Domain	18	55	67	24.5	1.6e-05	1	No_clan	sp|P01266|THYG_HUMAN Thyroglobulin OS=Homo sapiens OX=9606 GN=TG PE=1 SV=5
1596	P01266	1024	1073	1006	1073	PF00086.19	Thyroglobulin_1	Domain	20	67	67	57	1.1e-15	1	No_clan	sp|P01266|THYG_HUMAN Thyroglobulin OS=Homo sapiens OX=9606 GN=TG PE=1 SV=5
1597	P01266	1091	1143	1077	1149	PF00086.19	Thyroglobulin_1	Domain	11	62	67	27.4	2e-06	1	No_clan	sp|P01266|THYG_HUMAN Thyroglobulin OS=Homo sapiens OX=9606 GN=TG PE=1 SV=5
1598	P01266	1161	1210	1149	1210	PF00086.19	Thyroglobulin_1	Domain	19	67	67	49.2	3.2e-13	1	No_clan	sp|P01266|THYG_HUMAN Thyroglobulin OS=Homo sapiens OX=9606 GN=TG PE=1 SV=5
1599	P01266	1465	1510	1465	1510	PF07699.14	Ephrin_rec_like	Family	1	48	48	52.2	3.7e-14	1	No_clan	sp|P01266|THYG_HUMAN Thyroglobulin OS=Homo sapiens OX=9606 GN=TG PE=1 SV=5
1600	P01266	2199	2718	2197	2718	PF00135.29	COesterase	Domain	3	515	515	438.7	3.4e-131	1	CL0028	sp|P01266|THYG_HUMAN Thyroglobulin OS=Homo sapiens OX=9606 GN=TG PE=1 SV=5
1601	P22105	187	213	187	213	PF07974.14	EGF_2	Domain	1	32	32	22.3	0.00013	1	CL0001	sp|P22105|TENX_HUMAN Tenascin-X OS=Homo sapiens OX=9606 GN=TNXB PE=1 SV=5
1602	P22105	249	275	248	276	PF18720.2	EGF_Tenascin	Domain	2	28	29	22.2	0.00011	1	CL0001	sp|P22105|TENX_HUMAN Tenascin-X OS=Homo sapiens OX=9606 GN=TNXB PE=1 SV=5
1603	P22105	280	306	279	307	PF18720.2	EGF_Tenascin	Domain	2	28	29	21.3	0.0002	1	CL0001	sp|P22105|TENX_HUMAN Tenascin-X OS=Homo sapiens OX=9606 GN=TNXB PE=1 SV=5
1604	P22105	311	337	310	338	PF18720.2	EGF_Tenascin	Domain	2	28	29	25.7	8.3e-06	1	CL0001	sp|P22105|TENX_HUMAN Tenascin-X OS=Homo sapiens OX=9606 GN=TNXB PE=1 SV=5
1605	P22105	342	369	341	369	PF18720.2	EGF_Tenascin	Domain	2	29	29	15.8	0.011	1	CL0001	sp|P22105|TENX_HUMAN Tenascin-X OS=Homo sapiens OX=9606 GN=TNXB PE=1 SV=5
1606	P22105	373	399	372	400	PF18720.2	EGF_Tenascin	Domain	2	28	29	24.8	1.6e-05	1	CL0001	sp|P22105|TENX_HUMAN Tenascin-X OS=Homo sapiens OX=9606 GN=TNXB PE=1 SV=5
1607	P22105	435	461	434	462	PF18720.2	EGF_Tenascin	Domain	2	28	29	15.6	0.013	1	CL0001	sp|P22105|TENX_HUMAN Tenascin-X OS=Homo sapiens OX=9606 GN=TNXB PE=1 SV=5
1608	P22105	497	523	496	524	PF18720.2	EGF_Tenascin	Domain	2	28	29	17.1	0.0043	1	CL0001	sp|P22105|TENX_HUMAN Tenascin-X OS=Homo sapiens OX=9606 GN=TNXB PE=1 SV=5
1609	P22105	528	555	527	555	PF18720.2	EGF_Tenascin	Domain	2	29	29	18.5	0.0016	1	CL0001	sp|P22105|TENX_HUMAN Tenascin-X OS=Homo sapiens OX=9606 GN=TNXB PE=1 SV=5
1610	P22105	559	585	558	586	PF18720.2	EGF_Tenascin	Domain	2	28	29	20.4	0.0004	1	CL0001	sp|P22105|TENX_HUMAN Tenascin-X OS=Homo sapiens OX=9606 GN=TNXB PE=1 SV=5
1611	P22105	590	617	589	617	PF18720.2	EGF_Tenascin	Domain	2	29	29	16.7	0.0057	1	CL0001	sp|P22105|TENX_HUMAN Tenascin-X OS=Homo sapiens OX=9606 GN=TNXB PE=1 SV=5
1612	P22105	621	647	621	647	PF07974.14	EGF_2	Domain	1	32	32	24.2	3.3e-05	1	CL0001	sp|P22105|TENX_HUMAN Tenascin-X OS=Homo sapiens OX=9606 GN=TNXB PE=1 SV=5
1613	P22105	756	829	750	832	PF00041.22	fn3	Domain	7	82	85	43.4	3.4e-11	1	CL0159	sp|P22105|TENX_HUMAN Tenascin-X OS=Homo sapiens OX=9606 GN=TNXB PE=1 SV=5
1614	P22105	843	914	841	919	PF00041.22	fn3	Domain	3	79	85	40.7	2.3e-10	1	CL0159	sp|P22105|TENX_HUMAN Tenascin-X OS=Homo sapiens OX=9606 GN=TNXB PE=1 SV=5
1615	P22105	1066	1136	1062	1141	PF00041.22	fn3	Domain	4	79	85	43.9	2.3e-11	1	CL0159	sp|P22105|TENX_HUMAN Tenascin-X OS=Homo sapiens OX=9606 GN=TNXB PE=1 SV=5
1616	P22105	1163	1233	1159	1240	PF00041.22	fn3	Domain	4	79	85	38.1	1.5e-09	1	CL0159	sp|P22105|TENX_HUMAN Tenascin-X OS=Homo sapiens OX=9606 GN=TNXB PE=1 SV=5
1617	P22105	1266	1342	1262	1342	PF00041.22	fn3	Domain	5	85	85	46.7	3e-12	1	CL0159	sp|P22105|TENX_HUMAN Tenascin-X OS=Homo sapiens OX=9606 GN=TNXB PE=1 SV=5
1618	P22105	1377	1446	1373	1453	PF00041.22	fn3	Domain	5	79	85	37.1	3.1e-09	1	CL0159	sp|P22105|TENX_HUMAN Tenascin-X OS=Homo sapiens OX=9606 GN=TNXB PE=1 SV=5
1619	P22105	1478	1548	1475	1555	PF00041.22	fn3	Domain	4	79	85	44.7	1.3e-11	1	CL0159	sp|P22105|TENX_HUMAN Tenascin-X OS=Homo sapiens OX=9606 GN=TNXB PE=1 SV=5
1620	P22105	1581	1645	1578	1656	PF00041.22	fn3	Domain	4	73	85	43.6	2.8e-11	1	CL0159	sp|P22105|TENX_HUMAN Tenascin-X OS=Homo sapiens OX=9606 GN=TNXB PE=1 SV=5
1621	P22105	1679	1744	1674	1753	PF00041.22	fn3	Domain	5	76	85	35.2	1.2e-08	1	CL0159	sp|P22105|TENX_HUMAN Tenascin-X OS=Homo sapiens OX=9606 GN=TNXB PE=1 SV=5
1622	P22105	1781	1849	1777	1857	PF00041.22	fn3	Domain	5	78	85	34	2.9e-08	1	CL0159	sp|P22105|TENX_HUMAN Tenascin-X OS=Homo sapiens OX=9606 GN=TNXB PE=1 SV=5
1623	P22105	1885	1955	1881	1960	PF00041.22	fn3	Domain	4	79	85	31.6	1.6e-07	1	CL0159	sp|P22105|TENX_HUMAN Tenascin-X OS=Homo sapiens OX=9606 GN=TNXB PE=1 SV=5
1624	P22105	1991	2061	1988	2068	PF00041.22	fn3	Domain	4	79	85	48.4	9.2e-13	1	CL0159	sp|P22105|TENX_HUMAN Tenascin-X OS=Homo sapiens OX=9606 GN=TNXB PE=1 SV=5
1625	P22105	2100	2169	2096	2176	PF00041.22	fn3	Domain	5	79	85	43.9	2.4e-11	1	CL0159	sp|P22105|TENX_HUMAN Tenascin-X OS=Homo sapiens OX=9606 GN=TNXB PE=1 SV=5
1626	P22105	2199	2269	2196	2275	PF00041.22	fn3	Domain	5	80	85	45.8	6e-12	1	CL0159	sp|P22105|TENX_HUMAN Tenascin-X OS=Homo sapiens OX=9606 GN=TNXB PE=1 SV=5
1627	P22105	2307	2378	2304	2384	PF00041.22	fn3	Domain	4	80	85	49.5	4.1e-13	1	CL0159	sp|P22105|TENX_HUMAN Tenascin-X OS=Homo sapiens OX=9606 GN=TNXB PE=1 SV=5
1628	P22105	2416	2485	2412	2492	PF00041.22	fn3	Domain	5	79	85	43.9	2.4e-11	1	CL0159	sp|P22105|TENX_HUMAN Tenascin-X OS=Homo sapiens OX=9606 GN=TNXB PE=1 SV=5
1629	P22105	2527	2596	2523	2603	PF00041.22	fn3	Domain	5	79	85	45.3	8.6e-12	1	CL0159	sp|P22105|TENX_HUMAN Tenascin-X OS=Homo sapiens OX=9606 GN=TNXB PE=1 SV=5
1630	P22105	2632	2707	2629	2709	PF00041.22	fn3	Domain	4	83	85	47.5	1.8e-12	1	CL0159	sp|P22105|TENX_HUMAN Tenascin-X OS=Homo sapiens OX=9606 GN=TNXB PE=1 SV=5
1631	P22105	2741	2810	2737	2817	PF00041.22	fn3	Domain	5	79	85	45.2	9.1e-12	1	CL0159	sp|P22105|TENX_HUMAN Tenascin-X OS=Homo sapiens OX=9606 GN=TNXB PE=1 SV=5
1632	P22105	2848	2923	2845	2925	PF00041.22	fn3	Domain	4	83	85	47.2	2.1e-12	1	CL0159	sp|P22105|TENX_HUMAN Tenascin-X OS=Homo sapiens OX=9606 GN=TNXB PE=1 SV=5
1633	P22105	2957	3026	2953	3033	PF00041.22	fn3	Domain	5	79	85	43.1	4.1e-11	1	CL0159	sp|P22105|TENX_HUMAN Tenascin-X OS=Homo sapiens OX=9606 GN=TNXB PE=1 SV=5
1634	P22105	3064	3135	3061	3141	PF00041.22	fn3	Domain	4	80	85	46.4	3.8e-12	1	CL0159	sp|P22105|TENX_HUMAN Tenascin-X OS=Homo sapiens OX=9606 GN=TNXB PE=1 SV=5
1635	P22105	3171	3240	3167	3247	PF00041.22	fn3	Domain	5	79	85	45.9	5.5e-12	1	CL0159	sp|P22105|TENX_HUMAN Tenascin-X OS=Homo sapiens OX=9606 GN=TNXB PE=1 SV=5
1636	P22105	3266	3331	3263	3341	PF00041.22	fn3	Domain	4	74	85	33.1	5.2e-08	1	CL0159	sp|P22105|TENX_HUMAN Tenascin-X OS=Homo sapiens OX=9606 GN=TNXB PE=1 SV=5
1637	P22105	3359	3432	3355	3436	PF00041.22	fn3	Domain	4	81	85	45.8	6e-12	1	CL0159	sp|P22105|TENX_HUMAN Tenascin-X OS=Homo sapiens OX=9606 GN=TNXB PE=1 SV=5
1638	P22105	3453	3520	3449	3530	PF00041.22	fn3	Domain	4	76	85	43.9	2.3e-11	1	CL0159	sp|P22105|TENX_HUMAN Tenascin-X OS=Homo sapiens OX=9606 GN=TNXB PE=1 SV=5
1639	P22105	3562	3630	3557	3637	PF00041.22	fn3	Domain	6	79	85	39.8	4.2e-10	1	CL0159	sp|P22105|TENX_HUMAN Tenascin-X OS=Homo sapiens OX=9606 GN=TNXB PE=1 SV=5
1640	P22105	3658	3737	3656	3741	PF00041.22	fn3	Domain	3	77	85	32.2	1e-07	1	CL0159	sp|P22105|TENX_HUMAN Tenascin-X OS=Homo sapiens OX=9606 GN=TNXB PE=1 SV=5
1641	P22105	3758	3831	3757	3836	PF00041.22	fn3	Domain	2	79	85	51.2	1.2e-13	1	CL0159	sp|P22105|TENX_HUMAN Tenascin-X OS=Homo sapiens OX=9606 GN=TNXB PE=1 SV=5
1642	P22105	3848	3919	3846	3926	PF00041.22	fn3	Domain	3	79	85	28.5	1.4e-06	1	CL0159	sp|P22105|TENX_HUMAN Tenascin-X OS=Homo sapiens OX=9606 GN=TNXB PE=1 SV=5
1643	P22105	3935	4007	3934	4012	PF00041.22	fn3	Domain	2	79	85	34.4	2.2e-08	1	CL0159	sp|P22105|TENX_HUMAN Tenascin-X OS=Homo sapiens OX=9606 GN=TNXB PE=1 SV=5
1644	P22105	4026	4235	4026	4235	PF00147.19	Fibrinogen_C	Domain	1	221	221	302.4	2.1e-90	1	CL0422	sp|P22105|TENX_HUMAN Tenascin-X OS=Homo sapiens OX=9606 GN=TNXB PE=1 SV=5
1645	P17927	43	99	43	99	PF00084.21	Sushi	Domain	1	56	56	26.2	8.8e-06	1	CL0001	sp|P17927|CR1_HUMAN Complement receptor type 1 OS=Homo sapiens OX=9606 GN=CR1 PE=1 SV=3
1646	P17927	104	161	104	161	PF00084.21	Sushi	Domain	1	56	56	34.3	2.6e-08	1	CL0001	sp|P17927|CR1_HUMAN Complement receptor type 1 OS=Homo sapiens OX=9606 GN=CR1 PE=1 SV=3
1647	P17927	166	232	166	232	PF00084.21	Sushi	Domain	1	56	56	31.5	2.1e-07	1	CL0001	sp|P17927|CR1_HUMAN Complement receptor type 1 OS=Homo sapiens OX=9606 GN=CR1 PE=1 SV=3
1648	P17927	238	293	238	293	PF00084.21	Sushi	Domain	1	56	56	40.6	2.8e-10	1	CL0001	sp|P17927|CR1_HUMAN Complement receptor type 1 OS=Homo sapiens OX=9606 GN=CR1 PE=1 SV=3
1649	P17927	297	353	297	353	PF00084.21	Sushi	Domain	1	56	56	47.6	1.9e-12	1	CL0001	sp|P17927|CR1_HUMAN Complement receptor type 1 OS=Homo sapiens OX=9606 GN=CR1 PE=1 SV=3
1650	P17927	374	416	362	416	PF00084.21	Sushi	Domain	17	56	56	24.9	2.3e-05	1	CL0001	sp|P17927|CR1_HUMAN Complement receptor type 1 OS=Homo sapiens OX=9606 GN=CR1 PE=1 SV=3
1651	P17927	421	487	421	487	PF00084.21	Sushi	Domain	1	56	56	29.2	1e-06	1	CL0001	sp|P17927|CR1_HUMAN Complement receptor type 1 OS=Homo sapiens OX=9606 GN=CR1 PE=1 SV=3
1652	P17927	493	549	493	549	PF00084.21	Sushi	Domain	1	56	56	28.5	1.8e-06	1	CL0001	sp|P17927|CR1_HUMAN Complement receptor type 1 OS=Homo sapiens OX=9606 GN=CR1 PE=1 SV=3
1653	P17927	554	611	554	611	PF00084.21	Sushi	Domain	1	56	56	25.4	1.6e-05	1	CL0001	sp|P17927|CR1_HUMAN Complement receptor type 1 OS=Homo sapiens OX=9606 GN=CR1 PE=1 SV=3
1654	P17927	616	682	616	682	PF00084.21	Sushi	Domain	1	56	56	31.8	1.7e-07	1	CL0001	sp|P17927|CR1_HUMAN Complement receptor type 1 OS=Homo sapiens OX=9606 GN=CR1 PE=1 SV=3
1655	P17927	688	743	688	743	PF00084.21	Sushi	Domain	1	56	56	40.6	2.8e-10	1	CL0001	sp|P17927|CR1_HUMAN Complement receptor type 1 OS=Homo sapiens OX=9606 GN=CR1 PE=1 SV=3
1656	P17927	747	803	747	803	PF00084.21	Sushi	Domain	1	56	56	47.6	1.9e-12	1	CL0001	sp|P17927|CR1_HUMAN Complement receptor type 1 OS=Homo sapiens OX=9606 GN=CR1 PE=1 SV=3
1657	P17927	824	866	812	866	PF00084.21	Sushi	Domain	17	56	56	24.9	2.3e-05	1	CL0001	sp|P17927|CR1_HUMAN Complement receptor type 1 OS=Homo sapiens OX=9606 GN=CR1 PE=1 SV=3
1658	P17927	871	937	871	937	PF00084.21	Sushi	Domain	1	56	56	28	2.5e-06	1	CL0001	sp|P17927|CR1_HUMAN Complement receptor type 1 OS=Homo sapiens OX=9606 GN=CR1 PE=1 SV=3
1659	P17927	943	999	943	999	PF00084.21	Sushi	Domain	1	56	56	28.5	1.8e-06	1	CL0001	sp|P17927|CR1_HUMAN Complement receptor type 1 OS=Homo sapiens OX=9606 GN=CR1 PE=1 SV=3
1660	P17927	1004	1061	1004	1061	PF00084.21	Sushi	Domain	1	56	56	26.7	6.3e-06	1	CL0001	sp|P17927|CR1_HUMAN Complement receptor type 1 OS=Homo sapiens OX=9606 GN=CR1 PE=1 SV=3
1661	P17927	1066	1132	1066	1132	PF00084.21	Sushi	Domain	1	56	56	29.9	6.5e-07	1	CL0001	sp|P17927|CR1_HUMAN Complement receptor type 1 OS=Homo sapiens OX=9606 GN=CR1 PE=1 SV=3
1662	P17927	1138	1193	1138	1193	PF00084.21	Sushi	Domain	1	56	56	40.6	2.8e-10	1	CL0001	sp|P17927|CR1_HUMAN Complement receptor type 1 OS=Homo sapiens OX=9606 GN=CR1 PE=1 SV=3
1663	P17927	1197	1253	1197	1253	PF00084.21	Sushi	Domain	1	56	56	45.7	7.4e-12	1	CL0001	sp|P17927|CR1_HUMAN Complement receptor type 1 OS=Homo sapiens OX=9606 GN=CR1 PE=1 SV=3
1664	P17927	1266	1316	1260	1316	PF00084.21	Sushi	Domain	8	56	56	28.6	1.6e-06	1	CL0001	sp|P17927|CR1_HUMAN Complement receptor type 1 OS=Homo sapiens OX=9606 GN=CR1 PE=1 SV=3
1665	P17927	1321	1387	1321	1387	PF00084.21	Sushi	Domain	1	56	56	26.6	6.9e-06	1	CL0001	sp|P17927|CR1_HUMAN Complement receptor type 1 OS=Homo sapiens OX=9606 GN=CR1 PE=1 SV=3
1666	P17927	1396	1452	1396	1452	PF00084.21	Sushi	Domain	1	56	56	24	4.3e-05	1	CL0001	sp|P17927|CR1_HUMAN Complement receptor type 1 OS=Homo sapiens OX=9606 GN=CR1 PE=1 SV=3
1667	P17927	1457	1514	1457	1514	PF00084.21	Sushi	Domain	1	56	56	46	6e-12	1	CL0001	sp|P17927|CR1_HUMAN Complement receptor type 1 OS=Homo sapiens OX=9606 GN=CR1 PE=1 SV=3
1668	P17927	1519	1585	1519	1585	PF00084.21	Sushi	Domain	1	56	56	27	5.2e-06	1	CL0001	sp|P17927|CR1_HUMAN Complement receptor type 1 OS=Homo sapiens OX=9606 GN=CR1 PE=1 SV=3
1669	P17927	1591	1646	1591	1646	PF00084.21	Sushi	Domain	1	56	56	44	2.4e-11	1	CL0001	sp|P17927|CR1_HUMAN Complement receptor type 1 OS=Homo sapiens OX=9606 GN=CR1 PE=1 SV=3
1670	P17927	1650	1706	1650	1706	PF00084.21	Sushi	Domain	1	56	56	41.3	1.7e-10	1	CL0001	sp|P17927|CR1_HUMAN Complement receptor type 1 OS=Homo sapiens OX=9606 GN=CR1 PE=1 SV=3
1671	P17927	1727	1769	1713	1769	PF00084.21	Sushi	Domain	17	56	56	27.4	3.8e-06	1	CL0001	sp|P17927|CR1_HUMAN Complement receptor type 1 OS=Homo sapiens OX=9606 GN=CR1 PE=1 SV=3
1672	P17927	1774	1840	1774	1840	PF00084.21	Sushi	Domain	1	56	56	21.4	0.00028	1	CL0001	sp|P17927|CR1_HUMAN Complement receptor type 1 OS=Homo sapiens OX=9606 GN=CR1 PE=1 SV=3
1673	P17927	1848	1904	1848	1904	PF00084.21	Sushi	Domain	1	56	56	34.1	3.1e-08	1	CL0001	sp|P17927|CR1_HUMAN Complement receptor type 1 OS=Homo sapiens OX=9606 GN=CR1 PE=1 SV=3
1674	P17927	1925	1965	1910	1965	PF00084.21	Sushi	Domain	16	56	56	36.3	6.3e-09	1	CL0001	sp|P17927|CR1_HUMAN Complement receptor type 1 OS=Homo sapiens OX=9606 GN=CR1 PE=1 SV=3
1675	P11717	127	265	123	270	PF00878.19	CIMR	Family	5	137	143	64.4	1.2e-17	1	CL0226	sp|P11717|MPRI_HUMAN Cation-independent mannose-6-phosphate receptor OS=Homo sapiens OX=9606 GN=IGF2R PE=1 SV=3
1676	P11717	281	420	277	421	PF00878.19	CIMR	Family	5	142	143	67.3	1.4e-18	1	CL0226	sp|P11717|MPRI_HUMAN Cation-independent mannose-6-phosphate receptor OS=Homo sapiens OX=9606 GN=IGF2R PE=1 SV=3
1677	P11717	423	573	423	573	PF00878.19	CIMR	Family	1	143	143	184.4	1.2e-54	1	CL0226	sp|P11717|MPRI_HUMAN Cation-independent mannose-6-phosphate receptor OS=Homo sapiens OX=9606 GN=IGF2R PE=1 SV=3
1678	P11717	576	715	575	716	PF00878.19	CIMR	Family	2	142	143	136.9	5e-40	1	CL0226	sp|P11717|MPRI_HUMAN Cation-independent mannose-6-phosphate receptor OS=Homo sapiens OX=9606 GN=IGF2R PE=1 SV=3
1679	P11717	723	875	720	876	PF00878.19	CIMR	Family	4	142	143	106	1.7e-30	1	CL0226	sp|P11717|MPRI_HUMAN Cation-independent mannose-6-phosphate receptor OS=Homo sapiens OX=9606 GN=IGF2R PE=1 SV=3
1680	P11717	885	1023	882	1026	PF00878.19	CIMR	Family	4	136	143	29	9.9e-07	1	CL0226	sp|P11717|MPRI_HUMAN Cation-independent mannose-6-phosphate receptor OS=Homo sapiens OX=9606 GN=IGF2R PE=1 SV=3
1681	P11717	1032	1178	1031	1178	PF00878.19	CIMR	Family	2	143	143	191.7	6.4e-57	1	CL0226	sp|P11717|MPRI_HUMAN Cation-independent mannose-6-phosphate receptor OS=Homo sapiens OX=9606 GN=IGF2R PE=1 SV=3
1682	P11717	1183	1319	1179	1320	PF00878.19	CIMR	Family	5	142	143	48.7	7.8e-13	1	CL0226	sp|P11717|MPRI_HUMAN Cation-independent mannose-6-phosphate receptor OS=Homo sapiens OX=9606 GN=IGF2R PE=1 SV=3
1683	P11717	1323	1462	1322	1462	PF00878.19	CIMR	Family	2	143	143	174.4	1.3e-51	1	CL0226	sp|P11717|MPRI_HUMAN Cation-independent mannose-6-phosphate receptor OS=Homo sapiens OX=9606 GN=IGF2R PE=1 SV=3
1684	P11717	1466	1598	1465	1599	PF00878.19	CIMR	Family	2	142	143	78.3	6.1e-22	1	CL0226	sp|P11717|MPRI_HUMAN Cation-independent mannose-6-phosphate receptor OS=Homo sapiens OX=9606 GN=IGF2R PE=1 SV=3
1685	P11717	1607	1733	1603	1750	PF00878.19	CIMR	Family	5	127	143	69	4.4e-19	1	CL0226	sp|P11717|MPRI_HUMAN Cation-independent mannose-6-phosphate receptor OS=Homo sapiens OX=9606 GN=IGF2R PE=1 SV=3
1686	P11717	1758	1894	1755	1894	PF00878.19	CIMR	Family	4	143	143	66.8	2.1e-18	1	CL0226	sp|P11717|MPRI_HUMAN Cation-independent mannose-6-phosphate receptor OS=Homo sapiens OX=9606 GN=IGF2R PE=1 SV=3
1687	P11717	1903	1942	1903	1942	PF00040.20	fn2	Domain	1	42	42	59.9	2.1e-16	1	CL0602	sp|P11717|MPRI_HUMAN Cation-independent mannose-6-phosphate receptor OS=Homo sapiens OX=9606 GN=IGF2R PE=1 SV=3
1688	P11717	1949	2083	1946	2083	PF00878.19	CIMR	Family	4	143	143	68.2	7.5e-19	1	CL0226	sp|P11717|MPRI_HUMAN Cation-independent mannose-6-phosphate receptor OS=Homo sapiens OX=9606 GN=IGF2R PE=1 SV=3
1689	P11717	2087	2232	2085	2233	PF00878.19	CIMR	Family	3	142	143	28	2e-06	1	CL0226	sp|P11717|MPRI_HUMAN Cation-independent mannose-6-phosphate receptor OS=Homo sapiens OX=9606 GN=IGF2R PE=1 SV=3
1690	P11717	2240	2279	2237	2290	PF00878.19	CIMR	Family	4	44	143	24.6	2.2e-05	1	CL0226	sp|P11717|MPRI_HUMAN Cation-independent mannose-6-phosphate receptor OS=Homo sapiens OX=9606 GN=IGF2R PE=1 SV=3
1691	P78509	64	167	41	170	PF02014.17	Reeler	Family	27	126	129	29.1	1.4e-06	1	CL0159	sp|P78509|RELN_HUMAN Reelin OS=Homo sapiens OX=9606 GN=RELN PE=1 SV=3
1692	P78509	3231	3259	3230	3259	PF18720.2	EGF_Tenascin	Domain	2	29	29	16	0.0097	1	CL0001	sp|P78509|RELN_HUMAN Reelin OS=Homo sapiens OX=9606 GN=RELN PE=1 SV=3
1693	Q8N2E2	425	581	425	582	PF00094.26	VWD	Family	1	156	157	45.1	1.3e-11	1	No_clan	sp|Q8N2E2|VWDE_HUMAN von Willebrand factor D and EGF domain-containing protein OS=Homo sapiens OX=9606 GN=VWDE PE=2 SV=4
1694	Q5VYJ5	73	226	73	228	PF00629.24	MAM	Domain	1	158	160	75	6.3e-21	1	CL0004	sp|Q5VYJ5|MALR1_HUMAN MAM and LDL-receptor class A domain-containing protein 1 OS=Homo sapiens OX=9606 GN=MALRD1 PE=1 SV=4
1695	Q5VYJ5	270	420	270	426	PF00629.24	MAM	Domain	1	152	160	64.7	8.9e-18	1	CL0004	sp|Q5VYJ5|MALR1_HUMAN MAM and LDL-receptor class A domain-containing protein 1 OS=Homo sapiens OX=9606 GN=MALRD1 PE=1 SV=4
1696	Q5VYJ5	433	470	432	470	PF00057.19	Ldl_recept_a	Repeat	2	37	37	35.9	6.5e-09	1	No_clan	sp|Q5VYJ5|MALR1_HUMAN MAM and LDL-receptor class A domain-containing protein 1 OS=Homo sapiens OX=9606 GN=MALRD1 PE=1 SV=4
1697	Q5VYJ5	476	635	476	636	PF00629.24	MAM	Domain	1	159	160	81.6	5.6e-23	1	CL0004	sp|Q5VYJ5|MALR1_HUMAN MAM and LDL-receptor class A domain-containing protein 1 OS=Homo sapiens OX=9606 GN=MALRD1 PE=1 SV=4
1698	Q5VYJ5	654	814	654	815	PF00629.24	MAM	Domain	1	159	160	107	9e-31	1	CL0004	sp|Q5VYJ5|MALR1_HUMAN MAM and LDL-receptor class A domain-containing protein 1 OS=Homo sapiens OX=9606 GN=MALRD1 PE=1 SV=4
1699	Q5VYJ5	865	1022	865	1023	PF00629.24	MAM	Domain	1	159	160	150.8	3e-44	1	CL0004	sp|Q5VYJ5|MALR1_HUMAN MAM and LDL-receptor class A domain-containing protein 1 OS=Homo sapiens OX=9606 GN=MALRD1 PE=1 SV=4
1700	Q5VYJ5	1049	1085	1048	1085	PF00057.19	Ldl_recept_a	Repeat	2	37	37	26	8e-06	1	No_clan	sp|Q5VYJ5|MALR1_HUMAN MAM and LDL-receptor class A domain-containing protein 1 OS=Homo sapiens OX=9606 GN=MALRD1 PE=1 SV=4
1701	Q5VYJ5	1090	1254	1090	1255	PF00629.24	MAM	Domain	1	159	160	105.8	2e-30	1	CL0004	sp|Q5VYJ5|MALR1_HUMAN MAM and LDL-receptor class A domain-containing protein 1 OS=Homo sapiens OX=9606 GN=MALRD1 PE=1 SV=4
1702	Q5VYJ5	1263	1296	1262	1300	PF00057.19	Ldl_recept_a	Repeat	2	35	37	30.6	3e-07	1	No_clan	sp|Q5VYJ5|MALR1_HUMAN MAM and LDL-receptor class A domain-containing protein 1 OS=Homo sapiens OX=9606 GN=MALRD1 PE=1 SV=4
1703	Q5VYJ5	1307	1463	1307	1464	PF00629.24	MAM	Domain	1	159	160	121.9	2.3e-35	1	CL0004	sp|Q5VYJ5|MALR1_HUMAN MAM and LDL-receptor class A domain-containing protein 1 OS=Homo sapiens OX=9606 GN=MALRD1 PE=1 SV=4
1704	Q5VYJ5	1521	1674	1521	1675	PF00629.24	MAM	Domain	1	159	160	118.7	2.2e-34	1	CL0004	sp|Q5VYJ5|MALR1_HUMAN MAM and LDL-receptor class A domain-containing protein 1 OS=Homo sapiens OX=9606 GN=MALRD1 PE=1 SV=4
1705	Q5VYJ5	1687	1719	1682	1719	PF00057.19	Ldl_recept_a	Repeat	5	37	37	34.2	2.2e-08	1	No_clan	sp|Q5VYJ5|MALR1_HUMAN MAM and LDL-receptor class A domain-containing protein 1 OS=Homo sapiens OX=9606 GN=MALRD1 PE=1 SV=4
1706	Q5VYJ5	1729	1890	1729	1891	PF00629.24	MAM	Domain	1	159	160	107.5	6e-31	1	CL0004	sp|Q5VYJ5|MALR1_HUMAN MAM and LDL-receptor class A domain-containing protein 1 OS=Homo sapiens OX=9606 GN=MALRD1 PE=1 SV=4
1707	Q5VYJ5	1902	1938	1901	1938	PF00057.19	Ldl_recept_a	Repeat	2	37	37	33.3	4.3e-08	1	No_clan	sp|Q5VYJ5|MALR1_HUMAN MAM and LDL-receptor class A domain-containing protein 1 OS=Homo sapiens OX=9606 GN=MALRD1 PE=1 SV=4
1708	Q5VYJ5	1947	1981	1945	1981	PF00057.19	Ldl_recept_a	Repeat	3	37	37	33	5.2e-08	1	No_clan	sp|Q5VYJ5|MALR1_HUMAN MAM and LDL-receptor class A domain-containing protein 1 OS=Homo sapiens OX=9606 GN=MALRD1 PE=1 SV=4
1709	Q5VYJ5	2025	2055	2022	2055	PF00008.28	EGF	Domain	1	32	32	23.7	4.4e-05	1	CL0001	sp|Q5VYJ5|MALR1_HUMAN MAM and LDL-receptor class A domain-containing protein 1 OS=Homo sapiens OX=9606 GN=MALRD1 PE=1 SV=4
1710	Q6W4X9	45	192	45	193	PF00094.26	VWD	Family	1	156	157	84	1.3e-23	1	No_clan	sp|Q6W4X9|MUC6_HUMAN Mucin-6 OS=Homo sapiens OX=9606 GN=MUC6 PE=1 SV=3
1711	Q6W4X9	242	297	231	297	PF08742.12	C8	Domain	14	69	69	31.4	1.9e-07	1	No_clan	sp|Q6W4X9|MUC6_HUMAN Mucin-6 OS=Homo sapiens OX=9606 GN=MUC6 PE=1 SV=3
1712	Q6W4X9	302	357	302	357	PF01826.18	TIL	Domain	1	55	55	45.8	5.3e-12	1	No_clan	sp|Q6W4X9|MUC6_HUMAN Mucin-6 OS=Homo sapiens OX=9606 GN=MUC6 PE=1 SV=3
1713	Q6W4X9	397	549	397	550	PF00094.26	VWD	Family	1	156	157	96.2	2.3e-27	1	No_clan	sp|Q6W4X9|MUC6_HUMAN Mucin-6 OS=Homo sapiens OX=9606 GN=MUC6 PE=1 SV=3
1714	Q6W4X9	591	658	591	660	PF08742.12	C8	Domain	1	68	69	56.8	2.2e-15	1	No_clan	sp|Q6W4X9|MUC6_HUMAN Mucin-6 OS=Homo sapiens OX=9606 GN=MUC6 PE=1 SV=3
1715	Q6W4X9	764	827	764	827	PF01826.18	TIL	Domain	1	55	55	26.6	5.4e-06	1	No_clan	sp|Q6W4X9|MUC6_HUMAN Mucin-6 OS=Homo sapiens OX=9606 GN=MUC6 PE=1 SV=3
1716	Q6W4X9	868	1017	868	1019	PF00094.26	VWD	Family	1	155	157	103.9	1e-29	1	No_clan	sp|Q6W4X9|MUC6_HUMAN Mucin-6 OS=Homo sapiens OX=9606 GN=MUC6 PE=1 SV=3
1717	Q6W4X9	1060	1127	1060	1127	PF08742.12	C8	Domain	1	69	69	65	6.2e-18	1	No_clan	sp|Q6W4X9|MUC6_HUMAN Mucin-6 OS=Homo sapiens OX=9606 GN=MUC6 PE=1 SV=3
1718	Q5IJ48	112	140	112	142	PF00008.28	EGF	Domain	1	30	32	34.2	2.4e-08	1	CL0001	sp|Q5IJ48|CRUM2_HUMAN Protein crumbs homolog 2 OS=Homo sapiens OX=9606 GN=CRB2 PE=1 SV=2
1719	Q5IJ48	150	179	150	180	PF00008.28	EGF	Domain	1	31	32	31.4	1.7e-07	1	CL0001	sp|Q5IJ48|CRUM2_HUMAN Protein crumbs homolog 2 OS=Homo sapiens OX=9606 GN=CRB2 PE=1 SV=2
1720	Q5IJ48	188	218	188	219	PF00008.28	EGF	Domain	1	31	32	24.3	3e-05	1	CL0001	sp|Q5IJ48|CRUM2_HUMAN Protein crumbs homolog 2 OS=Homo sapiens OX=9606 GN=CRB2 PE=1 SV=2
1721	Q5IJ48	227	256	227	257	PF00008.28	EGF	Domain	1	31	32	27.2	3.7e-06	1	CL0001	sp|Q5IJ48|CRUM2_HUMAN Protein crumbs homolog 2 OS=Homo sapiens OX=9606 GN=CRB2 PE=1 SV=2
1722	Q5IJ48	324	354	324	354	PF00008.28	EGF	Domain	1	32	32	32.6	7.2e-08	1	CL0001	sp|Q5IJ48|CRUM2_HUMAN Protein crumbs homolog 2 OS=Homo sapiens OX=9606 GN=CRB2 PE=1 SV=2
1723	Q5IJ48	362	390	362	392	PF00008.28	EGF	Domain	1	30	32	28.7	1.2e-06	1	CL0001	sp|Q5IJ48|CRUM2_HUMAN Protein crumbs homolog 2 OS=Homo sapiens OX=9606 GN=CRB2 PE=1 SV=2
1724	Q5IJ48	465	588	465	588	PF02210.25	Laminin_G_2	Domain	1	126	126	32.7	1e-07	1	CL0004	sp|Q5IJ48|CRUM2_HUMAN Protein crumbs homolog 2 OS=Homo sapiens OX=9606 GN=CRB2 PE=1 SV=2
1725	Q5IJ48	609	638	609	639	PF00008.28	EGF	Domain	1	31	32	22	0.00015	1	CL0001	sp|Q5IJ48|CRUM2_HUMAN Protein crumbs homolog 2 OS=Homo sapiens OX=9606 GN=CRB2 PE=1 SV=2
1726	Q5IJ48	811	841	811	841	PF00008.28	EGF	Domain	1	32	32	33.5	3.7e-08	1	CL0001	sp|Q5IJ48|CRUM2_HUMAN Protein crumbs homolog 2 OS=Homo sapiens OX=9606 GN=CRB2 PE=1 SV=2
1727	Q5IJ48	1060	1090	1060	1090	PF00008.28	EGF	Domain	1	32	32	27.9	2.1e-06	1	CL0001	sp|Q5IJ48|CRUM2_HUMAN Protein crumbs homolog 2 OS=Homo sapiens OX=9606 GN=CRB2 PE=1 SV=2
1728	Q5IJ48	1103	1124	1103	1124	PF12661.8	hEGF	Domain	1	22	22	17.1	0.0067	1	CL0001	sp|Q5IJ48|CRUM2_HUMAN Protein crumbs homolog 2 OS=Homo sapiens OX=9606 GN=CRB2 PE=1 SV=2
1729	Q8TER0	169	256	168	257	PF06119.15	NIDO	Family	2	87	88	94.7	5.1e-27	1	No_clan	sp|Q8TER0|SNED1_HUMAN Sushi, nidogen and EGF-like domain-containing protein 1 OS=Homo sapiens OX=9606 GN=SNED1 PE=2 SV=2
1730	Q8TER0	272	307	272	307	PF00008.28	EGF	Domain	1	32	32	27	4.2e-06	1	CL0001	sp|Q8TER0|SNED1_HUMAN Sushi, nidogen and EGF-like domain-containing protein 1 OS=Homo sapiens OX=9606 GN=SNED1 PE=2 SV=2
1731	Q8TER0	315	345	315	345	PF00008.28	EGF	Domain	1	32	32	27.9	2.2e-06	1	CL0001	sp|Q8TER0|SNED1_HUMAN Sushi, nidogen and EGF-like domain-containing protein 1 OS=Homo sapiens OX=9606 GN=SNED1 PE=2 SV=2
1732	Q8TER0	358	379	358	379	PF12661.8	hEGF	Domain	1	22	22	15.4	0.022	1	CL0001	sp|Q8TER0|SNED1_HUMAN Sushi, nidogen and EGF-like domain-containing protein 1 OS=Homo sapiens OX=9606 GN=SNED1 PE=2 SV=2
1733	Q8TER0	391	421	391	421	PF00008.28	EGF	Domain	1	32	32	36.6	4.1e-09	1	CL0001	sp|Q8TER0|SNED1_HUMAN Sushi, nidogen and EGF-like domain-containing protein 1 OS=Homo sapiens OX=9606 GN=SNED1 PE=2 SV=2
1734	Q8TER0	433	461	433	463	PF00008.28	EGF	Domain	1	30	32	33.7	3.3e-08	1	CL0001	sp|Q8TER0|SNED1_HUMAN Sushi, nidogen and EGF-like domain-containing protein 1 OS=Homo sapiens OX=9606 GN=SNED1 PE=2 SV=2
1735	Q8TER0	474	494	474	494	PF12661.8	hEGF	Domain	1	22	22	16.3	0.012	1	CL0001	sp|Q8TER0|SNED1_HUMAN Sushi, nidogen and EGF-like domain-containing protein 1 OS=Homo sapiens OX=9606 GN=SNED1 PE=2 SV=2
1736	Q8TER0	545	575	545	575	PF00008.28	EGF	Domain	1	32	32	27.6	2.7e-06	1	CL0001	sp|Q8TER0|SNED1_HUMAN Sushi, nidogen and EGF-like domain-containing protein 1 OS=Homo sapiens OX=9606 GN=SNED1 PE=2 SV=2
1737	Q8TER0	584	614	584	614	PF00008.28	EGF	Domain	1	32	32	22.1	0.00014	1	CL0001	sp|Q8TER0|SNED1_HUMAN Sushi, nidogen and EGF-like domain-containing protein 1 OS=Homo sapiens OX=9606 GN=SNED1 PE=2 SV=2
1738	Q8TER0	623	653	623	653	PF00008.28	EGF	Domain	1	32	32	32.6	7.5e-08	1	CL0001	sp|Q8TER0|SNED1_HUMAN Sushi, nidogen and EGF-like domain-containing protein 1 OS=Homo sapiens OX=9606 GN=SNED1 PE=2 SV=2
1739	Q8TER0	666	687	666	687	PF12661.8	hEGF	Domain	1	22	22	22.6	0.00012	1	CL0001	sp|Q8TER0|SNED1_HUMAN Sushi, nidogen and EGF-like domain-containing protein 1 OS=Homo sapiens OX=9606 GN=SNED1 PE=2 SV=2
1740	Q8TER0	757	787	757	787	PF00008.28	EGF	Domain	1	32	32	28.6	1.3e-06	1	CL0001	sp|Q8TER0|SNED1_HUMAN Sushi, nidogen and EGF-like domain-containing protein 1 OS=Homo sapiens OX=9606 GN=SNED1 PE=2 SV=2
1741	Q8TER0	795	824	795	825	PF00008.28	EGF	Domain	1	31	32	27.3	3.2e-06	1	CL0001	sp|Q8TER0|SNED1_HUMAN Sushi, nidogen and EGF-like domain-containing protein 1 OS=Homo sapiens OX=9606 GN=SNED1 PE=2 SV=2
1742	Q8TER0	833	861	833	863	PF00008.28	EGF	Domain	1	30	32	24.3	2.8e-05	1	CL0001	sp|Q8TER0|SNED1_HUMAN Sushi, nidogen and EGF-like domain-containing protein 1 OS=Homo sapiens OX=9606 GN=SNED1 PE=2 SV=2
1743	Q8TER0	908	987	908	991	PF00041.22	fn3	Domain	2	80	85	41.3	1.5e-10	1	CL0159	sp|Q8TER0|SNED1_HUMAN Sushi, nidogen and EGF-like domain-containing protein 1 OS=Homo sapiens OX=9606 GN=SNED1 PE=2 SV=2
1744	Q8TER0	1007	1083	1005	1088	PF00041.22	fn3	Domain	2	79	85	34.6	1.8e-08	1	CL0159	sp|Q8TER0|SNED1_HUMAN Sushi, nidogen and EGF-like domain-containing protein 1 OS=Homo sapiens OX=9606 GN=SNED1 PE=2 SV=2
1745	Q8TER0	1106	1184	1105	1186	PF00041.22	fn3	Domain	2	83	85	43.1	4.1e-11	1	CL0159	sp|Q8TER0|SNED1_HUMAN Sushi, nidogen and EGF-like domain-containing protein 1 OS=Homo sapiens OX=9606 GN=SNED1 PE=2 SV=2
1746	Q8TER0	1311	1341	1311	1341	PF00008.28	EGF	Domain	1	32	32	32.7	7e-08	1	CL0001	sp|Q8TER0|SNED1_HUMAN Sushi, nidogen and EGF-like domain-containing protein 1 OS=Homo sapiens OX=9606 GN=SNED1 PE=2 SV=2
1747	O75093	33	60	33	60	PF01462.19	LRRNT	Family	1	28	28	32.8	3.6e-08	1	No_clan	sp|O75093|SLIT1_HUMAN Slit homolog 1 protein OS=Homo sapiens OX=9606 GN=SLIT1 PE=1 SV=4
1748	O75093	62	121	61	121	PF13855.7	LRR_8	Repeat	2	61	61	47.2	1.4e-12	1	CL0022	sp|O75093|SLIT1_HUMAN Slit homolog 1 protein OS=Homo sapiens OX=9606 GN=SLIT1 PE=1 SV=4
1749	O75093	159	217	157	217	PF13855.7	LRR_8	Repeat	3	61	61	48.9	4.1e-13	1	CL0022	sp|O75093|SLIT1_HUMAN Slit homolog 1 protein OS=Homo sapiens OX=9606 GN=SLIT1 PE=1 SV=4
1750	O75093	239	264	239	264	PF01463.25	LRRCT	Family	1	26	26	22.6	9.9e-05	1	No_clan	sp|O75093|SLIT1_HUMAN Slit homolog 1 protein OS=Homo sapiens OX=9606 GN=SLIT1 PE=1 SV=4
1751	O75093	282	308	281	308	PF01462.19	LRRNT	Family	2	28	28	34.9	8.2e-09	1	No_clan	sp|O75093|SLIT1_HUMAN Slit homolog 1 protein OS=Homo sapiens OX=9606 GN=SLIT1 PE=1 SV=4
1752	O75093	311	369	309	369	PF13855.7	LRR_8	Repeat	3	61	61	48.4	5.7e-13	1	CL0022	sp|O75093|SLIT1_HUMAN Slit homolog 1 protein OS=Homo sapiens OX=9606 GN=SLIT1 PE=1 SV=4
1753	O75093	382	440	381	441	PF13855.7	LRR_8	Repeat	2	60	61	44.6	8.9e-12	1	CL0022	sp|O75093|SLIT1_HUMAN Slit homolog 1 protein OS=Homo sapiens OX=9606 GN=SLIT1 PE=1 SV=4
1754	O75093	464	488	463	488	PF01463.25	LRRCT	Family	2	26	26	16.2	0.011	1	No_clan	sp|O75093|SLIT1_HUMAN Slit homolog 1 protein OS=Homo sapiens OX=9606 GN=SLIT1 PE=1 SV=4
1755	O75093	591	649	589	649	PF13855.7	LRR_8	Repeat	3	61	61	52.1	4.1e-14	1	CL0022	sp|O75093|SLIT1_HUMAN Slit homolog 1 protein OS=Homo sapiens OX=9606 GN=SLIT1 PE=1 SV=4
1756	O75093	695	720	695	720	PF01463.25	LRRCT	Family	1	26	26	19	0.0014	1	No_clan	sp|O75093|SLIT1_HUMAN Slit homolog 1 protein OS=Homo sapiens OX=9606 GN=SLIT1 PE=1 SV=4
1757	O75093	733	760	733	760	PF01462.19	LRRNT	Family	1	28	28	24.9	1.1e-05	1	No_clan	sp|O75093|SLIT1_HUMAN Slit homolog 1 protein OS=Homo sapiens OX=9606 GN=SLIT1 PE=1 SV=4
1758	O75093	808	868	808	868	PF13855.7	LRR_8	Repeat	1	61	61	43.4	2.2e-11	1	CL0022	sp|O75093|SLIT1_HUMAN Slit homolog 1 protein OS=Homo sapiens OX=9606 GN=SLIT1 PE=1 SV=4
1759	O75093	891	914	890	915	PF01463.25	LRRCT	Family	2	25	26	14.5	0.039	1	No_clan	sp|O75093|SLIT1_HUMAN Slit homolog 1 protein OS=Homo sapiens OX=9606 GN=SLIT1 PE=1 SV=4
1760	O75093	929	959	929	960	PF00008.28	EGF	Domain	1	31	32	29.8	5.6e-07	1	CL0001	sp|O75093|SLIT1_HUMAN Slit homolog 1 protein OS=Homo sapiens OX=9606 GN=SLIT1 PE=1 SV=4
1761	O75093	968	1001	968	1001	PF00008.28	EGF	Domain	1	32	32	23.4	5.4e-05	1	CL0001	sp|O75093|SLIT1_HUMAN Slit homolog 1 protein OS=Homo sapiens OX=9606 GN=SLIT1 PE=1 SV=4
1762	O75093	1009	1038	1009	1039	PF00008.28	EGF	Domain	1	31	32	23.3	5.9e-05	1	CL0001	sp|O75093|SLIT1_HUMAN Slit homolog 1 protein OS=Homo sapiens OX=9606 GN=SLIT1 PE=1 SV=4
1763	O75093	1047	1079	1047	1079	PF00008.28	EGF	Domain	1	32	32	23.8	4.3e-05	1	CL0001	sp|O75093|SLIT1_HUMAN Slit homolog 1 protein OS=Homo sapiens OX=9606 GN=SLIT1 PE=1 SV=4
1764	O75093	1087	1115	1087	1117	PF00008.28	EGF	Domain	1	30	32	32.1	1.1e-07	1	CL0001	sp|O75093|SLIT1_HUMAN Slit homolog 1 protein OS=Homo sapiens OX=9606 GN=SLIT1 PE=1 SV=4
1765	O75093	1136	1157	1136	1157	PF12661.8	hEGF	Domain	1	22	22	20.7	0.00049	1	CL0001	sp|O75093|SLIT1_HUMAN Slit homolog 1 protein OS=Homo sapiens OX=9606 GN=SLIT1 PE=1 SV=4
1766	O75093	1195	1322	1194	1322	PF02210.25	Laminin_G_2	Domain	2	126	126	94.7	6.3e-27	1	CL0004	sp|O75093|SLIT1_HUMAN Slit homolog 1 protein OS=Homo sapiens OX=9606 GN=SLIT1 PE=1 SV=4
1767	O75093	1347	1368	1347	1368	PF12661.8	hEGF	Domain	1	22	22	16.8	0.008	1	CL0001	sp|O75093|SLIT1_HUMAN Slit homolog 1 protein OS=Homo sapiens OX=9606 GN=SLIT1 PE=1 SV=4
1768	O75094	33	60	33	60	PF01462.19	LRRNT	Family	1	28	28	35.5	5.4e-09	1	No_clan	sp|O75094|SLIT3_HUMAN Slit homolog 3 protein OS=Homo sapiens OX=9606 GN=SLIT3 PE=2 SV=3
1769	O75094	62	121	61	121	PF13855.7	LRR_8	Repeat	2	61	61	50.1	1.8e-13	1	CL0022	sp|O75094|SLIT3_HUMAN Slit homolog 3 protein OS=Homo sapiens OX=9606 GN=SLIT3 PE=2 SV=3
1770	O75094	159	217	157	217	PF13855.7	LRR_8	Repeat	3	61	61	44.4	1e-11	1	CL0022	sp|O75094|SLIT3_HUMAN Slit homolog 3 protein OS=Homo sapiens OX=9606 GN=SLIT3 PE=2 SV=3
1771	O75094	240	264	239	264	PF01463.25	LRRCT	Family	2	26	26	15	0.028	1	No_clan	sp|O75094|SLIT3_HUMAN Slit homolog 3 protein OS=Homo sapiens OX=9606 GN=SLIT3 PE=2 SV=3
1772	O75094	280	306	279	306	PF01462.19	LRRNT	Family	2	28	28	27.2	2.2e-06	1	No_clan	sp|O75094|SLIT3_HUMAN Slit homolog 3 protein OS=Homo sapiens OX=9606 GN=SLIT3 PE=2 SV=3
1773	O75094	332	391	331	391	PF13855.7	LRR_8	Repeat	2	61	61	56	2.5e-15	1	CL0022	sp|O75094|SLIT3_HUMAN Slit homolog 3 protein OS=Homo sapiens OX=9606 GN=SLIT3 PE=2 SV=3
1774	O75094	462	486	461	486	PF01463.25	LRRCT	Family	2	26	26	14.2	0.048	1	No_clan	sp|O75094|SLIT3_HUMAN Slit homolog 3 protein OS=Homo sapiens OX=9606 GN=SLIT3 PE=2 SV=3
1775	O75094	582	641	581	641	PF13855.7	LRR_8	Repeat	2	61	61	49.6	2.4e-13	1	CL0022	sp|O75094|SLIT3_HUMAN Slit homolog 3 protein OS=Homo sapiens OX=9606 GN=SLIT3 PE=2 SV=3
1776	O75094	687	712	687	712	PF01463.25	LRRCT	Family	1	26	26	16.7	0.0076	1	No_clan	sp|O75094|SLIT3_HUMAN Slit homolog 3 protein OS=Homo sapiens OX=9606 GN=SLIT3 PE=2 SV=3
1777	O75094	725	751	724	751	PF01462.19	LRRNT	Family	2	28	28	28.4	8.8e-07	1	No_clan	sp|O75094|SLIT3_HUMAN Slit homolog 3 protein OS=Homo sapiens OX=9606 GN=SLIT3 PE=2 SV=3
1778	O75094	799	859	799	859	PF13855.7	LRR_8	Repeat	1	61	61	47.2	1.4e-12	1	CL0022	sp|O75094|SLIT3_HUMAN Slit homolog 3 protein OS=Homo sapiens OX=9606 GN=SLIT3 PE=2 SV=3
1779	O75094	882	906	881	906	PF01463.25	LRRCT	Family	2	26	26	17.5	0.0042	1	No_clan	sp|O75094|SLIT3_HUMAN Slit homolog 3 protein OS=Homo sapiens OX=9606 GN=SLIT3 PE=2 SV=3
1780	O75094	925	944	925	944	PF12661.8	hEGF	Domain	1	19	22	13.7	0.075	1	CL0001	sp|O75094|SLIT3_HUMAN Slit homolog 3 protein OS=Homo sapiens OX=9606 GN=SLIT3 PE=2 SV=3
1781	O75094	959	992	959	992	PF00008.28	EGF	Domain	1	32	32	25.7	1e-05	1	CL0001	sp|O75094|SLIT3_HUMAN Slit homolog 3 protein OS=Homo sapiens OX=9606 GN=SLIT3 PE=2 SV=3
1782	O75094	1000	1029	1000	1030	PF00008.28	EGF	Domain	1	31	32	31.1	2.2e-07	1	CL0001	sp|O75094|SLIT3_HUMAN Slit homolog 3 protein OS=Homo sapiens OX=9606 GN=SLIT3 PE=2 SV=3
1783	O75094	1038	1069	1038	1070	PF00008.28	EGF	Domain	1	31	32	30.3	3.7e-07	1	CL0001	sp|O75094|SLIT3_HUMAN Slit homolog 3 protein OS=Homo sapiens OX=9606 GN=SLIT3 PE=2 SV=3
1784	O75094	1078	1107	1078	1108	PF00008.28	EGF	Domain	1	31	32	30.7	2.9e-07	1	CL0001	sp|O75094|SLIT3_HUMAN Slit homolog 3 protein OS=Homo sapiens OX=9606 GN=SLIT3 PE=2 SV=3
1785	O75094	1123	1153	1123	1153	PF00008.28	EGF	Domain	1	32	32	31.3	1.9e-07	1	CL0001	sp|O75094|SLIT3_HUMAN Slit homolog 3 protein OS=Homo sapiens OX=9606 GN=SLIT3 PE=2 SV=3
1786	O75094	1187	1314	1186	1314	PF02210.25	Laminin_G_2	Domain	2	126	126	82.7	3.2e-23	1	CL0004	sp|O75094|SLIT3_HUMAN Slit homolog 3 protein OS=Homo sapiens OX=9606 GN=SLIT3 PE=2 SV=3
1787	O75094	1372	1400	1371	1401	PF00008.28	EGF	Domain	1	31	32	24.6	2.4e-05	1	CL0001	sp|O75094|SLIT3_HUMAN Slit homolog 3 protein OS=Homo sapiens OX=9606 GN=SLIT3 PE=2 SV=3
1788	O94813	27	54	27	54	PF01462.19	LRRNT	Family	1	28	28	28.5	8.4e-07	1	No_clan	sp|O94813|SLIT2_HUMAN Slit homolog 2 protein OS=Homo sapiens OX=9606 GN=SLIT2 PE=1 SV=1
1789	O94813	56	115	55	115	PF13855.7	LRR_8	Repeat	2	61	61	54.3	8.2e-15	1	CL0022	sp|O94813|SLIT2_HUMAN Slit homolog 2 protein OS=Homo sapiens OX=9606 GN=SLIT2 PE=1 SV=1
1790	O94813	128	187	127	187	PF13855.7	LRR_8	Repeat	2	61	61	48	7.9e-13	1	CL0022	sp|O94813|SLIT2_HUMAN Slit homolog 2 protein OS=Homo sapiens OX=9606 GN=SLIT2 PE=1 SV=1
1791	O94813	234	258	234	258	PF01463.25	LRRCT	Family	2	26	26	17.7	0.0036	1	No_clan	sp|O94813|SLIT2_HUMAN Slit homolog 2 protein OS=Homo sapiens OX=9606 GN=SLIT2 PE=1 SV=1
1792	O94813	273	299	272	299	PF01462.19	LRRNT	Family	2	28	28	30.8	1.6e-07	1	No_clan	sp|O94813|SLIT2_HUMAN Slit homolog 2 protein OS=Homo sapiens OX=9606 GN=SLIT2 PE=1 SV=1
1793	O94813	302	360	300	360	PF13855.7	LRR_8	Repeat	3	61	61	52.9	2.2e-14	1	CL0022	sp|O94813|SLIT2_HUMAN Slit homolog 2 protein OS=Homo sapiens OX=9606 GN=SLIT2 PE=1 SV=1
1794	O94813	373	431	372	432	PF13855.7	LRR_8	Repeat	2	60	61	41.3	9.8e-11	1	CL0022	sp|O94813|SLIT2_HUMAN Slit homolog 2 protein OS=Homo sapiens OX=9606 GN=SLIT2 PE=1 SV=1
1795	O94813	455	479	454	479	PF01463.25	LRRCT	Family	2	26	26	14.5	0.041	1	No_clan	sp|O94813|SLIT2_HUMAN Slit homolog 2 protein OS=Homo sapiens OX=9606 GN=SLIT2 PE=1 SV=1
1796	O94813	537	581	534	587	PF13855.7	LRR_8	Repeat	5	48	61	31.1	1.4e-07	1	CL0022	sp|O94813|SLIT2_HUMAN Slit homolog 2 protein OS=Homo sapiens OX=9606 GN=SLIT2 PE=1 SV=1
1797	O94813	607	665	607	666	PF13855.7	LRR_8	Repeat	2	60	61	48.7	4.6e-13	1	CL0022	sp|O94813|SLIT2_HUMAN Slit homolog 2 protein OS=Homo sapiens OX=9606 GN=SLIT2 PE=1 SV=1
1798	O94813	688	713	688	713	PF01463.25	LRRCT	Family	1	26	26	13.5	0.083	1	No_clan	sp|O94813|SLIT2_HUMAN Slit homolog 2 protein OS=Homo sapiens OX=9606 GN=SLIT2 PE=1 SV=1
1799	O94813	727	753	726	753	PF01462.19	LRRNT	Family	2	28	28	27.7	1.5e-06	1	No_clan	sp|O94813|SLIT2_HUMAN Slit homolog 2 protein OS=Homo sapiens OX=9606 GN=SLIT2 PE=1 SV=1
1800	O94813	805	861	803	861	PF13855.7	LRR_8	Repeat	5	61	61	42.7	3.5e-11	1	CL0022	sp|O94813|SLIT2_HUMAN Slit homolog 2 protein OS=Homo sapiens OX=9606 GN=SLIT2 PE=1 SV=1
1801	O94813	884	907	883	908	PF01463.25	LRRCT	Family	2	25	26	14.9	0.03	1	No_clan	sp|O94813|SLIT2_HUMAN Slit homolog 2 protein OS=Homo sapiens OX=9606 GN=SLIT2 PE=1 SV=1
1802	O94813	922	952	922	953	PF00008.28	EGF	Domain	1	31	32	22.7	9.1e-05	1	CL0001	sp|O94813|SLIT2_HUMAN Slit homolog 2 protein OS=Homo sapiens OX=9606 GN=SLIT2 PE=1 SV=1
1803	O94813	961	994	961	994	PF00008.28	EGF	Domain	1	32	32	26.5	5.7e-06	1	CL0001	sp|O94813|SLIT2_HUMAN Slit homolog 2 protein OS=Homo sapiens OX=9606 GN=SLIT2 PE=1 SV=1
1804	O94813	1002	1031	1002	1032	PF00008.28	EGF	Domain	1	31	32	27.5	2.9e-06	1	CL0001	sp|O94813|SLIT2_HUMAN Slit homolog 2 protein OS=Homo sapiens OX=9606 GN=SLIT2 PE=1 SV=1
1805	O94813	1040	1072	1040	1072	PF00008.28	EGF	Domain	1	32	32	30.4	3.6e-07	1	CL0001	sp|O94813|SLIT2_HUMAN Slit homolog 2 protein OS=Homo sapiens OX=9606 GN=SLIT2 PE=1 SV=1
1806	O94813	1080	1109	1080	1110	PF00008.28	EGF	Domain	1	31	32	32.9	5.9e-08	1	CL0001	sp|O94813|SLIT2_HUMAN Slit homolog 2 protein OS=Homo sapiens OX=9606 GN=SLIT2 PE=1 SV=1
1807	O94813	1130	1151	1130	1151	PF12661.8	hEGF	Domain	1	22	22	24.3	3.6e-05	1	CL0001	sp|O94813|SLIT2_HUMAN Slit homolog 2 protein OS=Homo sapiens OX=9606 GN=SLIT2 PE=1 SV=1
1808	O94813	1188	1318	1188	1319	PF00054.24	Laminin_G_1	Domain	1	130	131	94.1	8e-27	1	CL0004	sp|O94813|SLIT2_HUMAN Slit homolog 2 protein OS=Homo sapiens OX=9606 GN=SLIT2 PE=1 SV=1
1809	O94813	1341	1362	1341	1362	PF12661.8	hEGF	Domain	1	22	22	14.7	0.037	1	CL0001	sp|O94813|SLIT2_HUMAN Slit homolog 2 protein OS=Homo sapiens OX=9606 GN=SLIT2 PE=1 SV=1
1810	Q8N6G6	38	81	37	81	PF00090.20	TSP_1	Domain	2	49	49	24.1	3.1e-05	1	CL0692	sp|Q8N6G6|ATL1_HUMAN ADAMTS-like protein 1 OS=Homo sapiens OX=9606 GN=ADAMTSL1 PE=1 SV=4
1811	Q8N6G6	301	359	301	359	PF19030.1	TSP1_ADAMTS	Domain	1	55	55	29.9	5.1e-07	1	CL0692	sp|Q8N6G6|ATL1_HUMAN ADAMTS-like protein 1 OS=Homo sapiens OX=9606 GN=ADAMTSL1 PE=1 SV=4
1812	Q8N6G6	380	437	380	437	PF19030.1	TSP1_ADAMTS	Domain	1	55	55	41.7	1e-10	1	CL0692	sp|Q8N6G6|ATL1_HUMAN ADAMTS-like protein 1 OS=Homo sapiens OX=9606 GN=ADAMTSL1 PE=1 SV=4
1813	Q8N6G6	440	488	440	492	PF19030.1	TSP1_ADAMTS	Domain	1	51	55	39.7	4.3e-10	1	CL0692	sp|Q8N6G6|ATL1_HUMAN ADAMTS-like protein 1 OS=Homo sapiens OX=9606 GN=ADAMTSL1 PE=1 SV=4
1814	Q8N6G6	528	583	526	583	PF19030.1	TSP1_ADAMTS	Domain	3	55	55	40.5	2.5e-10	1	CL0692	sp|Q8N6G6|ATL1_HUMAN ADAMTS-like protein 1 OS=Homo sapiens OX=9606 GN=ADAMTSL1 PE=1 SV=4
1815	Q8N6G6	611	666	611	666	PF19030.1	TSP1_ADAMTS	Domain	1	55	55	40.5	2.4e-10	1	CL0692	sp|Q8N6G6|ATL1_HUMAN ADAMTS-like protein 1 OS=Homo sapiens OX=9606 GN=ADAMTSL1 PE=1 SV=4
1816	Q8N6G6	670	728	670	728	PF19030.1	TSP1_ADAMTS	Domain	1	55	55	60.6	1.3e-16	1	CL0692	sp|Q8N6G6|ATL1_HUMAN ADAMTS-like protein 1 OS=Homo sapiens OX=9606 GN=ADAMTSL1 PE=1 SV=4
1817	Q8N6G6	732	788	732	788	PF19030.1	TSP1_ADAMTS	Domain	1	55	55	41.6	1.1e-10	1	CL0692	sp|Q8N6G6|ATL1_HUMAN ADAMTS-like protein 1 OS=Homo sapiens OX=9606 GN=ADAMTSL1 PE=1 SV=4
1818	Q8N6G6	792	849	792	849	PF19030.1	TSP1_ADAMTS	Domain	1	55	55	35.1	1.2e-08	1	CL0692	sp|Q8N6G6|ATL1_HUMAN ADAMTS-like protein 1 OS=Homo sapiens OX=9606 GN=ADAMTSL1 PE=1 SV=4
1819	Q8N6G6	892	949	887	950	PF13927.7	Ig_3	Domain	16	77	79	31.7	1.8e-07	1	CL0011	sp|Q8N6G6|ATL1_HUMAN ADAMTS-like protein 1 OS=Homo sapiens OX=9606 GN=ADAMTSL1 PE=1 SV=4
1820	Q8N6G6	1197	1266	1180	1267	PF07679.17	I-set	Domain	17	89	90	42.2	6.3e-11	1	CL0011	sp|Q8N6G6|ATL1_HUMAN ADAMTS-like protein 1 OS=Homo sapiens OX=9606 GN=ADAMTSL1 PE=1 SV=4
1821	Q8N6G6	1285	1357	1285	1357	PF13927.7	Ig_3	Domain	1	79	79	49.7	4.1e-13	1	CL0011	sp|Q8N6G6|ATL1_HUMAN ADAMTS-like protein 1 OS=Homo sapiens OX=9606 GN=ADAMTSL1 PE=1 SV=4
1822	Q8N6G6	1404	1486	1395	1486	PF07679.17	I-set	Domain	8	90	90	36.3	4.5e-09	1	CL0011	sp|Q8N6G6|ATL1_HUMAN ADAMTS-like protein 1 OS=Homo sapiens OX=9606 GN=ADAMTSL1 PE=1 SV=4
1823	Q8N6G6	1549	1607	1549	1607	PF19030.1	TSP1_ADAMTS	Domain	1	55	55	45.9	5.1e-12	1	CL0692	sp|Q8N6G6|ATL1_HUMAN ADAMTS-like protein 1 OS=Homo sapiens OX=9606 GN=ADAMTSL1 PE=1 SV=4
1824	Q8N6G6	1610	1666	1610	1666	PF19030.1	TSP1_ADAMTS	Domain	1	55	55	27.8	2.2e-06	1	CL0692	sp|Q8N6G6|ATL1_HUMAN ADAMTS-like protein 1 OS=Homo sapiens OX=9606 GN=ADAMTSL1 PE=1 SV=4
1825	Q8N6G6	1670	1725	1670	1725	PF19030.1	TSP1_ADAMTS	Domain	1	55	55	39.7	4.2e-10	1	CL0692	sp|Q8N6G6|ATL1_HUMAN ADAMTS-like protein 1 OS=Homo sapiens OX=9606 GN=ADAMTSL1 PE=1 SV=4
1826	Q8N6G6	1730	1759	1730	1760	PF08686.12	PLAC	Domain	1	30	31	30.5	4.6e-07	1	No_clan	sp|Q8N6G6|ATL1_HUMAN ADAMTS-like protein 1 OS=Homo sapiens OX=9606 GN=ADAMTSL1 PE=1 SV=4
1827	P82987	80	123	79	123	PF00090.20	TSP_1	Domain	2	49	49	23.8	3.8e-05	1	CL0692	sp|P82987|ATL3_HUMAN ADAMTS-like protein 3 OS=Homo sapiens OX=9606 GN=ADAMTSL3 PE=1 SV=4
1828	P82987	343	401	343	401	PF19030.1	TSP1_ADAMTS	Domain	1	55	55	26.2	6.9e-06	1	CL0692	sp|P82987|ATL3_HUMAN ADAMTS-like protein 3 OS=Homo sapiens OX=9606 GN=ADAMTSL3 PE=1 SV=4
1829	P82987	422	479	422	479	PF19030.1	TSP1_ADAMTS	Domain	1	55	55	45.3	7.6e-12	1	CL0692	sp|P82987|ATL3_HUMAN ADAMTS-like protein 3 OS=Homo sapiens OX=9606 GN=ADAMTSL3 PE=1 SV=4
1830	P82987	482	529	482	534	PF19030.1	TSP1_ADAMTS	Domain	1	51	55	33.6	3.4e-08	1	CL0692	sp|P82987|ATL3_HUMAN ADAMTS-like protein 3 OS=Homo sapiens OX=9606 GN=ADAMTSL3 PE=1 SV=4
1831	P82987	569	625	568	625	PF19030.1	TSP1_ADAMTS	Domain	2	55	55	41.1	1.6e-10	1	CL0692	sp|P82987|ATL3_HUMAN ADAMTS-like protein 3 OS=Homo sapiens OX=9606 GN=ADAMTSL3 PE=1 SV=4
1832	P82987	648	703	648	703	PF19030.1	TSP1_ADAMTS	Domain	1	55	55	32.1	9.9e-08	1	CL0692	sp|P82987|ATL3_HUMAN ADAMTS-like protein 3 OS=Homo sapiens OX=9606 GN=ADAMTSL3 PE=1 SV=4
1833	P82987	707	759	707	759	PF19030.1	TSP1_ADAMTS	Domain	1	55	55	52.5	4.3e-14	1	CL0692	sp|P82987|ATL3_HUMAN ADAMTS-like protein 3 OS=Homo sapiens OX=9606 GN=ADAMTSL3 PE=1 SV=4
1834	P82987	763	819	763	819	PF19030.1	TSP1_ADAMTS	Domain	1	55	55	42.1	7.8e-11	1	CL0692	sp|P82987|ATL3_HUMAN ADAMTS-like protein 3 OS=Homo sapiens OX=9606 GN=ADAMTSL3 PE=1 SV=4
1835	P82987	825	880	824	880	PF19030.1	TSP1_ADAMTS	Domain	3	55	55	32.1	1e-07	1	CL0692	sp|P82987|ATL3_HUMAN ADAMTS-like protein 3 OS=Homo sapiens OX=9606 GN=ADAMTSL3 PE=1 SV=4
1836	P82987	1309	1382	1307	1384	PF07679.17	I-set	Domain	10	88	90	47.1	1.9e-12	1	CL0011	sp|P82987|ATL3_HUMAN ADAMTS-like protein 3 OS=Homo sapiens OX=9606 GN=ADAMTSL3 PE=1 SV=4
1837	P82987	1428	1483	1428	1483	PF19030.1	TSP1_ADAMTS	Domain	1	55	55	33.6	3.4e-08	1	CL0692	sp|P82987|ATL3_HUMAN ADAMTS-like protein 3 OS=Homo sapiens OX=9606 GN=ADAMTSL3 PE=1 SV=4
1838	P82987	1487	1544	1487	1544	PF19030.1	TSP1_ADAMTS	Domain	1	55	55	40.8	2e-10	1	CL0692	sp|P82987|ATL3_HUMAN ADAMTS-like protein 3 OS=Homo sapiens OX=9606 GN=ADAMTSL3 PE=1 SV=4
1839	P82987	1601	1655	1601	1655	PF19030.1	TSP1_ADAMTS	Domain	1	55	55	39.3	5.6e-10	1	CL0692	sp|P82987|ATL3_HUMAN ADAMTS-like protein 3 OS=Homo sapiens OX=9606 GN=ADAMTSL3 PE=1 SV=4
1840	P82987	1659	1689	1659	1689	PF08686.12	PLAC	Domain	1	31	31	35.1	1.6e-08	1	No_clan	sp|P82987|ATL3_HUMAN ADAMTS-like protein 3 OS=Homo sapiens OX=9606 GN=ADAMTSL3 PE=1 SV=4
1841	Q9NR16	51	147	51	148	PF00530.19	SRCR	Domain	1	99	100	102.1	1.8e-29	1	CL0550	sp|Q9NR16|C163B_HUMAN Scavenger receptor cysteine-rich type 1 protein M160 OS=Homo sapiens OX=9606 GN=CD163L1 PE=1 SV=2
1842	Q9NR16	159	254	158	255	PF00530.19	SRCR	Domain	2	99	100	100.8	4.6e-29	1	CL0550	sp|Q9NR16|C163B_HUMAN Scavenger receptor cysteine-rich type 1 protein M160 OS=Homo sapiens OX=9606 GN=CD163L1 PE=1 SV=2
1843	Q9NR16	265	362	265	362	PF00530.19	SRCR	Domain	1	100	100	93.9	6.5e-27	1	CL0550	sp|Q9NR16|C163B_HUMAN Scavenger receptor cysteine-rich type 1 protein M160 OS=Homo sapiens OX=9606 GN=CD163L1 PE=1 SV=2
1844	Q9NR16	373	469	372	469	PF00530.19	SRCR	Domain	2	100	100	86.9	9.7e-25	1	CL0550	sp|Q9NR16|C163B_HUMAN Scavenger receptor cysteine-rich type 1 protein M160 OS=Homo sapiens OX=9606 GN=CD163L1 PE=1 SV=2
1845	Q9NR16	480	576	479	576	PF00530.19	SRCR	Domain	2	100	100	102.9	1e-29	1	CL0550	sp|Q9NR16|C163B_HUMAN Scavenger receptor cysteine-rich type 1 protein M160 OS=Homo sapiens OX=9606 GN=CD163L1 PE=1 SV=2
1846	Q9NR16	586	683	586	683	PF00530.19	SRCR	Domain	1	100	100	98.8	1.9e-28	1	CL0550	sp|Q9NR16|C163B_HUMAN Scavenger receptor cysteine-rich type 1 protein M160 OS=Homo sapiens OX=9606 GN=CD163L1 PE=1 SV=2
1847	Q9NR16	693	790	693	790	PF00530.19	SRCR	Domain	1	100	100	76	2.5e-21	1	CL0550	sp|Q9NR16|C163B_HUMAN Scavenger receptor cysteine-rich type 1 protein M160 OS=Homo sapiens OX=9606 GN=CD163L1 PE=1 SV=2
1848	Q9NR16	800	895	798	895	PF00530.19	SRCR	Domain	3	100	100	82.9	1.8e-23	1	CL0550	sp|Q9NR16|C163B_HUMAN Scavenger receptor cysteine-rich type 1 protein M160 OS=Homo sapiens OX=9606 GN=CD163L1 PE=1 SV=2
1849	Q9NR16	903	1000	903	1000	PF00530.19	SRCR	Domain	1	100	100	75.7	3.1e-21	1	CL0550	sp|Q9NR16|C163B_HUMAN Scavenger receptor cysteine-rich type 1 protein M160 OS=Homo sapiens OX=9606 GN=CD163L1 PE=1 SV=2
1850	Q9NR16	1040	1136	1039	1136	PF00530.19	SRCR	Domain	2	100	100	110.7	3.7e-32	1	CL0550	sp|Q9NR16|C163B_HUMAN Scavenger receptor cysteine-rich type 1 protein M160 OS=Homo sapiens OX=9606 GN=CD163L1 PE=1 SV=2
1851	Q9NR16	1149	1243	1146	1243	PF00530.19	SRCR	Domain	4	100	100	63.8	1.6e-17	1	CL0550	sp|Q9NR16|C163B_HUMAN Scavenger receptor cysteine-rich type 1 protein M160 OS=Homo sapiens OX=9606 GN=CD163L1 PE=1 SV=2
1852	Q9NR16	1250	1346	1249	1346	PF00530.19	SRCR	Domain	2	100	100	109.7	7.8e-32	1	CL0550	sp|Q9NR16|C163B_HUMAN Scavenger receptor cysteine-rich type 1 protein M160 OS=Homo sapiens OX=9606 GN=CD163L1 PE=1 SV=2
1853	Q9Y6N6	35	269	35	269	PF00055.18	Laminin_N	Family	1	233	233	252.9	2.8e-75	1	CL0202	sp|Q9Y6N6|LAMC3_HUMAN Laminin subunit gamma-3 OS=Homo sapiens OX=9606 GN=LAMC3 PE=1 SV=3
1854	Q9Y6N6	271	314	271	324	PF00053.25	Laminin_EGF	Domain	1	44	49	27.9	2e-06	1	CL0001	sp|Q9Y6N6|LAMC3_HUMAN Laminin subunit gamma-3 OS=Homo sapiens OX=9606 GN=LAMC3 PE=1 SV=3
1855	Q9Y6N6	327	377	327	380	PF00053.25	Laminin_EGF	Domain	1	46	49	27.8	2.2e-06	1	CL0001	sp|Q9Y6N6|LAMC3_HUMAN Laminin subunit gamma-3 OS=Homo sapiens OX=9606 GN=LAMC3 PE=1 SV=3
1856	Q9Y6N6	383	427	383	427	PF00053.25	Laminin_EGF	Domain	1	49	49	32.8	5.7e-08	1	CL0001	sp|Q9Y6N6|LAMC3_HUMAN Laminin subunit gamma-3 OS=Homo sapiens OX=9606 GN=LAMC3 PE=1 SV=3
1857	Q9Y6N6	430	477	430	477	PF00053.25	Laminin_EGF	Domain	1	49	49	40	3.3e-10	1	CL0001	sp|Q9Y6N6|LAMC3_HUMAN Laminin subunit gamma-3 OS=Homo sapiens OX=9606 GN=LAMC3 PE=1 SV=3
1858	Q9Y6N6	540	671	539	671	PF00052.19	Laminin_B	Family	2	135	135	93.3	1.1e-26	1	CL0202	sp|Q9Y6N6|LAMC3_HUMAN Laminin subunit gamma-3 OS=Homo sapiens OX=9606 GN=LAMC3 PE=1 SV=3
1859	Q9Y6N6	673	694	669	704	PF00053.25	Laminin_EGF	Domain	20	41	49	15.7	0.013	1	CL0001	sp|Q9Y6N6|LAMC3_HUMAN Laminin subunit gamma-3 OS=Homo sapiens OX=9606 GN=LAMC3 PE=1 SV=3
1860	Q9Y6N6	707	752	707	752	PF00053.25	Laminin_EGF	Domain	1	49	49	35.9	6e-09	1	CL0001	sp|Q9Y6N6|LAMC3_HUMAN Laminin subunit gamma-3 OS=Homo sapiens OX=9606 GN=LAMC3 PE=1 SV=3
1861	Q9Y6N6	755	804	755	807	PF00053.25	Laminin_EGF	Domain	1	46	49	19.3	0.00096	1	CL0001	sp|Q9Y6N6|LAMC3_HUMAN Laminin subunit gamma-3 OS=Homo sapiens OX=9606 GN=LAMC3 PE=1 SV=3
1862	Q9Y6N6	810	858	810	863	PF00053.25	Laminin_EGF	Domain	1	44	49	36.9	3e-09	1	CL0001	sp|Q9Y6N6|LAMC3_HUMAN Laminin subunit gamma-3 OS=Homo sapiens OX=9606 GN=LAMC3 PE=1 SV=3
1863	Q9Y6N6	866	914	866	914	PF00053.25	Laminin_EGF	Domain	1	49	49	39	6.7e-10	1	CL0001	sp|Q9Y6N6|LAMC3_HUMAN Laminin subunit gamma-3 OS=Homo sapiens OX=9606 GN=LAMC3 PE=1 SV=3
1864	Q9Y6N6	917	958	917	962	PF00053.25	Laminin_EGF	Domain	1	44	49	44.6	1.1e-11	1	CL0001	sp|Q9Y6N6|LAMC3_HUMAN Laminin subunit gamma-3 OS=Homo sapiens OX=9606 GN=LAMC3 PE=1 SV=3
1865	Q9Y6N6	965	1010	965	1013	PF00053.25	Laminin_EGF	Domain	1	46	49	30.2	3.7e-07	1	CL0001	sp|Q9Y6N6|LAMC3_HUMAN Laminin subunit gamma-3 OS=Homo sapiens OX=9606 GN=LAMC3 PE=1 SV=3
1866	P98095	445	480	445	480	PF01821.19	ANATO	Domain	1	36	36	25.3	2.2e-05	1	No_clan	sp|P98095|FBLN2_HUMAN Fibulin-2 OS=Homo sapiens OX=9606 GN=FBLN2 PE=1 SV=2
1867	P98095	616	644	608	644	PF14670.7	FXa_inhibition	Domain	8	36	36	39.8	4.2e-10	1	CL0001	sp|P98095|FBLN2_HUMAN Fibulin-2 OS=Homo sapiens OX=9606 GN=FBLN2 PE=1 SV=2
1868	P98095	719	759	719	762	PF07645.16	EGF_CA	Domain	1	39	42	37.7	1.8e-09	1	CL0001	sp|P98095|FBLN2_HUMAN Fibulin-2 OS=Homo sapiens OX=9606 GN=FBLN2 PE=1 SV=2
1869	P98095	764	808	764	808	PF07645.16	EGF_CA	Domain	1	42	42	42.7	4.9e-11	1	CL0001	sp|P98095|FBLN2_HUMAN Fibulin-2 OS=Homo sapiens OX=9606 GN=FBLN2 PE=1 SV=2
1870	P98095	810	856	810	856	PF07645.16	EGF_CA	Domain	1	42	42	42.1	7.5e-11	1	CL0001	sp|P98095|FBLN2_HUMAN Fibulin-2 OS=Homo sapiens OX=9606 GN=FBLN2 PE=1 SV=2
1871	P98095	858	894	858	899	PF07645.16	EGF_CA	Domain	1	37	42	37.8	1.6e-09	1	CL0001	sp|P98095|FBLN2_HUMAN Fibulin-2 OS=Homo sapiens OX=9606 GN=FBLN2 PE=1 SV=2
1872	P98095	923	946	923	946	PF12662.8	cEGF	Domain	1	24	24	37.5	1.6e-09	1	CL0001	sp|P98095|FBLN2_HUMAN Fibulin-2 OS=Homo sapiens OX=9606 GN=FBLN2 PE=1 SV=2
1873	P98095	962	985	962	985	PF12662.8	cEGF	Domain	1	24	24	38	1.2e-09	1	CL0001	sp|P98095|FBLN2_HUMAN Fibulin-2 OS=Homo sapiens OX=9606 GN=FBLN2 PE=1 SV=2
1874	P98095	1025	1073	1025	1073	PF07645.16	EGF_CA	Domain	1	42	42	45.6	5.9e-12	1	CL0001	sp|P98095|FBLN2_HUMAN Fibulin-2 OS=Homo sapiens OX=9606 GN=FBLN2 PE=1 SV=2
1875	P08F94	260	313	259	341	PF01833.25	TIG	Domain	2	59	85	37.2	2.3e-09	1	CL0159	sp|P08F94|PKHD1_HUMAN Fibrocystin OS=Homo sapiens OX=9606 GN=PKHD1 PE=1 SV=1
1876	P08F94	945	1001	931	1010	PF01833.25	TIG	Domain	16	73	85	36.6	3.5e-09	1	CL0159	sp|P08F94|PKHD1_HUMAN Fibrocystin OS=Homo sapiens OX=9606 GN=PKHD1 PE=1 SV=1
1877	P08F94	1019	1102	1019	1102	PF01833.25	TIG	Domain	1	85	85	24.9	1.6e-05	1	CL0159	sp|P08F94|PKHD1_HUMAN Fibrocystin OS=Homo sapiens OX=9606 GN=PKHD1 PE=1 SV=1
1878	P08F94	1108	1189	1108	1192	PF01833.25	TIG	Domain	1	82	85	21.6	0.00017	1	CL0159	sp|P08F94|PKHD1_HUMAN Fibrocystin OS=Homo sapiens OX=9606 GN=PKHD1 PE=1 SV=1
1879	P08F94	1389	1473	1389	1479	PF01833.25	TIG	Domain	1	78	85	35.8	6.6e-09	1	CL0159	sp|P08F94|PKHD1_HUMAN Fibrocystin OS=Homo sapiens OX=9606 GN=PKHD1 PE=1 SV=1
1880	P08F94	1487	1565	1486	1569	PF01833.25	TIG	Domain	2	81	85	30.4	3.1e-07	1	CL0159	sp|P08F94|PKHD1_HUMAN Fibrocystin OS=Homo sapiens OX=9606 GN=PKHD1 PE=1 SV=1
1881	P08F94	1577	1642	1573	1658	PF01833.25	TIG	Domain	5	73	85	29.9	4.4e-07	1	CL0159	sp|P08F94|PKHD1_HUMAN Fibrocystin OS=Homo sapiens OX=9606 GN=PKHD1 PE=1 SV=1
1882	P08F94	1934	2051	1933	2052	PF10162.10	G8	Domain	2	120	121	93.3	1.2e-26	1	No_clan	sp|P08F94|PKHD1_HUMAN Fibrocystin OS=Homo sapiens OX=9606 GN=PKHD1 PE=1 SV=1
1883	P08F94	2243	2418	2242	2419	PF13229.7	Beta_helix	Family	2	157	158	35.1	1.1e-08	1	CL0268	sp|P08F94|PKHD1_HUMAN Fibrocystin OS=Homo sapiens OX=9606 GN=PKHD1 PE=1 SV=1
1884	P08F94	2749	2871	2748	2872	PF10162.10	G8	Domain	2	120	121	76.1	2.4e-21	1	No_clan	sp|P08F94|PKHD1_HUMAN Fibrocystin OS=Homo sapiens OX=9606 GN=PKHD1 PE=1 SV=1
1885	P08F94	3012	3172	3002	3177	PF13229.7	Beta_helix	Family	8	153	158	29.9	4.6e-07	1	CL0268	sp|P08F94|PKHD1_HUMAN Fibrocystin OS=Homo sapiens OX=9606 GN=PKHD1 PE=1 SV=1
1886	P11047	50	284	50	284	PF00055.18	Laminin_N	Family	1	233	233	272.8	2.4e-81	1	CL0202	sp|P11047|LAMC1_HUMAN Laminin subunit gamma-1 OS=Homo sapiens OX=9606 GN=LAMC1 PE=1 SV=3
1887	P11047	286	332	286	339	PF00053.25	Laminin_EGF	Domain	1	44	49	27.5	2.6e-06	1	CL0001	sp|P11047|LAMC1_HUMAN Laminin subunit gamma-1 OS=Homo sapiens OX=9606 GN=LAMC1 PE=1 SV=3
1888	P11047	342	395	342	395	PF00053.25	Laminin_EGF	Domain	1	49	49	28.3	1.5e-06	1	CL0001	sp|P11047|LAMC1_HUMAN Laminin subunit gamma-1 OS=Homo sapiens OX=9606 GN=LAMC1 PE=1 SV=3
1889	P11047	398	442	398	442	PF00053.25	Laminin_EGF	Domain	1	49	49	38.4	1e-09	1	CL0001	sp|P11047|LAMC1_HUMAN Laminin subunit gamma-1 OS=Homo sapiens OX=9606 GN=LAMC1 PE=1 SV=3
1890	P11047	445	492	445	492	PF00053.25	Laminin_EGF	Domain	1	49	49	44.9	9.8e-12	1	CL0001	sp|P11047|LAMC1_HUMAN Laminin subunit gamma-1 OS=Homo sapiens OX=9606 GN=LAMC1 PE=1 SV=3
1891	P11047	558	688	558	688	PF00052.19	Laminin_B	Family	1	135	135	103.8	6.5e-30	1	CL0202	sp|P11047|LAMC1_HUMAN Laminin subunit gamma-1 OS=Homo sapiens OX=9606 GN=LAMC1 PE=1 SV=3
1892	P11047	724	770	724	771	PF00053.25	Laminin_EGF	Domain	1	49	49	39.1	6.2e-10	1	CL0001	sp|P11047|LAMC1_HUMAN Laminin subunit gamma-1 OS=Homo sapiens OX=9606 GN=LAMC1 PE=1 SV=3
1893	P11047	773	816	772	823	PF00053.25	Laminin_EGF	Domain	1	43	49	21.6	0.00018	1	CL0001	sp|P11047|LAMC1_HUMAN Laminin subunit gamma-1 OS=Homo sapiens OX=9606 GN=LAMC1 PE=1 SV=3
1894	P11047	828	881	828	881	PF00053.25	Laminin_EGF	Domain	1	49	49	35.5	8.4e-09	1	CL0001	sp|P11047|LAMC1_HUMAN Laminin subunit gamma-1 OS=Homo sapiens OX=9606 GN=LAMC1 PE=1 SV=3
1895	P11047	884	932	884	932	PF00053.25	Laminin_EGF	Domain	1	49	49	39.2	5.7e-10	1	CL0001	sp|P11047|LAMC1_HUMAN Laminin subunit gamma-1 OS=Homo sapiens OX=9606 GN=LAMC1 PE=1 SV=3
1896	P11047	935	980	935	980	PF00053.25	Laminin_EGF	Domain	1	49	49	38.6	8.6e-10	1	CL0001	sp|P11047|LAMC1_HUMAN Laminin subunit gamma-1 OS=Homo sapiens OX=9606 GN=LAMC1 PE=1 SV=3
1897	P11047	983	1028	983	1034	PF00053.25	Laminin_EGF	Domain	1	49	49	27.6	2.3e-06	1	CL0001	sp|P11047|LAMC1_HUMAN Laminin subunit gamma-1 OS=Homo sapiens OX=9606 GN=LAMC1 PE=1 SV=3
1898	P24821	190	217	189	217	PF18720.2	EGF_Tenascin	Domain	2	29	29	28.5	1.2e-06	1	CL0001	sp|P24821|TENA_HUMAN Tenascin OS=Homo sapiens OX=9606 GN=TNC PE=1 SV=3
1899	P24821	221	247	221	247	PF07974.14	EGF_2	Domain	1	32	32	22.2	0.00013	1	CL0001	sp|P24821|TENA_HUMAN Tenascin OS=Homo sapiens OX=9606 GN=TNC PE=1 SV=3
1900	P24821	252	279	251	280	PF18720.2	EGF_Tenascin	Domain	2	28	29	20.6	0.00035	1	CL0001	sp|P24821|TENA_HUMAN Tenascin OS=Homo sapiens OX=9606 GN=TNC PE=1 SV=3
1901	P24821	287	311	283	311	PF18720.2	EGF_Tenascin	Domain	5	29	29	18.3	0.0019	1	CL0001	sp|P24821|TENA_HUMAN Tenascin OS=Homo sapiens OX=9606 GN=TNC PE=1 SV=3
1902	P24821	346	373	345	373	PF18720.2	EGF_Tenascin	Domain	2	29	29	20.9	0.00027	1	CL0001	sp|P24821|TENA_HUMAN Tenascin OS=Homo sapiens OX=9606 GN=TNC PE=1 SV=3
1903	P24821	377	403	377	403	PF07974.14	EGF_2	Domain	1	32	32	25.6	1.2e-05	1	CL0001	sp|P24821|TENA_HUMAN Tenascin OS=Homo sapiens OX=9606 GN=TNC PE=1 SV=3
1904	P24821	408	435	407	435	PF18720.2	EGF_Tenascin	Domain	2	29	29	32.8	5.1e-08	1	CL0001	sp|P24821|TENA_HUMAN Tenascin OS=Homo sapiens OX=9606 GN=TNC PE=1 SV=3
1905	P24821	439	466	438	466	PF18720.2	EGF_Tenascin	Domain	2	29	29	22.9	6.7e-05	1	CL0001	sp|P24821|TENA_HUMAN Tenascin OS=Homo sapiens OX=9606 GN=TNC PE=1 SV=3
1906	P24821	470	496	470	496	PF07974.14	EGF_2	Domain	1	32	32	25.3	1.5e-05	1	CL0001	sp|P24821|TENA_HUMAN Tenascin OS=Homo sapiens OX=9606 GN=TNC PE=1 SV=3
1907	P24821	501	527	500	528	PF18720.2	EGF_Tenascin	Domain	2	28	29	28.8	9.5e-07	1	CL0001	sp|P24821|TENA_HUMAN Tenascin OS=Homo sapiens OX=9606 GN=TNC PE=1 SV=3
1908	P24821	532	558	532	558	PF07974.14	EGF_2	Domain	1	32	32	22.9	8e-05	1	CL0001	sp|P24821|TENA_HUMAN Tenascin OS=Homo sapiens OX=9606 GN=TNC PE=1 SV=3
1909	P24821	563	589	562	590	PF18720.2	EGF_Tenascin	Domain	2	28	29	18.8	0.0013	1	CL0001	sp|P24821|TENA_HUMAN Tenascin OS=Homo sapiens OX=9606 GN=TNC PE=1 SV=3
1910	P24821	594	621	593	621	PF18720.2	EGF_Tenascin	Domain	2	29	29	19.4	0.00083	1	CL0001	sp|P24821|TENA_HUMAN Tenascin OS=Homo sapiens OX=9606 GN=TNC PE=1 SV=3
1911	P24821	624	696	624	701	PF00041.22	fn3	Domain	1	77	85	41.2	1.6e-10	1	CL0159	sp|P24821|TENA_HUMAN Tenascin OS=Homo sapiens OX=9606 GN=TNC PE=1 SV=3
1912	P24821	713	793	713	794	PF00041.22	fn3	Domain	1	83	85	54.4	1.3e-14	1	CL0159	sp|P24821|TENA_HUMAN Tenascin OS=Homo sapiens OX=9606 GN=TNC PE=1 SV=3
1913	P24821	804	879	804	884	PF00041.22	fn3	Domain	1	79	85	40.9	2e-10	1	CL0159	sp|P24821|TENA_HUMAN Tenascin OS=Homo sapiens OX=9606 GN=TNC PE=1 SV=3
1914	P24821	894	974	894	977	PF00041.22	fn3	Domain	1	82	85	53.8	1.8e-14	1	CL0159	sp|P24821|TENA_HUMAN Tenascin OS=Homo sapiens OX=9606 GN=TNC PE=1 SV=3
1915	P24821	987	1062	986	1065	PF00041.22	fn3	Domain	2	82	85	52.4	5e-14	1	CL0159	sp|P24821|TENA_HUMAN Tenascin OS=Homo sapiens OX=9606 GN=TNC PE=1 SV=3
1916	P24821	1077	1150	1074	1154	PF00041.22	fn3	Domain	3	79	85	43	4.5e-11	1	CL0159	sp|P24821|TENA_HUMAN Tenascin OS=Homo sapiens OX=9606 GN=TNC PE=1 SV=3
1917	P24821	1169	1241	1166	1248	PF00041.22	fn3	Domain	4	79	85	40.4	2.9e-10	1	CL0159	sp|P24821|TENA_HUMAN Tenascin OS=Homo sapiens OX=9606 GN=TNC PE=1 SV=3
1918	P24821	1259	1327	1257	1337	PF00041.22	fn3	Domain	3	74	85	49.9	3.2e-13	1	CL0159	sp|P24821|TENA_HUMAN Tenascin OS=Homo sapiens OX=9606 GN=TNC PE=1 SV=3
1919	P24821	1350	1422	1348	1427	PF00041.22	fn3	Domain	3	78	85	37.6	2.1e-09	1	CL0159	sp|P24821|TENA_HUMAN Tenascin OS=Homo sapiens OX=9606 GN=TNC PE=1 SV=3
1920	P24821	1440	1507	1439	1511	PF00041.22	fn3	Domain	2	72	85	32.1	1.1e-07	1	CL0159	sp|P24821|TENA_HUMAN Tenascin OS=Homo sapiens OX=9606 GN=TNC PE=1 SV=3
1921	P24821	1533	1605	1530	1610	PF00041.22	fn3	Domain	4	79	85	33.8	3.2e-08	1	CL0159	sp|P24821|TENA_HUMAN Tenascin OS=Homo sapiens OX=9606 GN=TNC PE=1 SV=3
1922	P24821	1622	1696	1621	1701	PF00041.22	fn3	Domain	2	79	85	36.1	6.4e-09	1	CL0159	sp|P24821|TENA_HUMAN Tenascin OS=Homo sapiens OX=9606 GN=TNC PE=1 SV=3
1923	P24821	1712	1785	1711	1790	PF00041.22	fn3	Domain	2	79	85	47.1	2.3e-12	1	CL0159	sp|P24821|TENA_HUMAN Tenascin OS=Homo sapiens OX=9606 GN=TNC PE=1 SV=3
1924	P24821	1802	1873	1800	1877	PF00041.22	fn3	Domain	3	79	85	37.5	2.3e-09	1	CL0159	sp|P24821|TENA_HUMAN Tenascin OS=Homo sapiens OX=9606 GN=TNC PE=1 SV=3
1925	P24821	1888	1960	1888	1964	PF00041.22	fn3	Domain	1	78	85	55.3	6.3e-15	1	CL0159	sp|P24821|TENA_HUMAN Tenascin OS=Homo sapiens OX=9606 GN=TNC PE=1 SV=3
1926	P24821	1980	2189	1980	2189	PF00147.19	Fibrinogen_C	Domain	1	221	221	300.4	8.6e-90	1	CL0422	sp|P24821|TENA_HUMAN Tenascin OS=Homo sapiens OX=9606 GN=TNC PE=1 SV=3
1927	Q92673	134	586	133	586	PF15902.6	Sortilin-Vps10	Domain	2	446	446	374.7	6.2e-112	1	CL0434	sp|Q92673|SORL_HUMAN Sortilin-related receptor OS=Homo sapiens OX=9606 GN=SORL1 PE=1 SV=2
1928	Q92673	588	752	588	752	PF15901.6	Sortilin_C	Domain	1	170	170	141.3	3.8e-41	1	No_clan	sp|Q92673|SORL_HUMAN Sortilin-related receptor OS=Homo sapiens OX=9606 GN=SORL1 PE=1 SV=2
1929	Q92673	845	883	844	884	PF00058.18	Ldl_recept_b	Repeat	2	40	42	21	0.00035	1	CL0186	sp|Q92673|SORL_HUMAN Sortilin-related receptor OS=Homo sapiens OX=9606 GN=SORL1 PE=1 SV=2
1930	Q92673	890	929	888	929	PF00058.18	Ldl_recept_b	Repeat	3	41	42	28.3	1.9e-06	1	CL0186	sp|Q92673|SORL_HUMAN Sortilin-related receptor OS=Homo sapiens OX=9606 GN=SORL1 PE=1 SV=2
1931	Q92673	1076	1112	1076	1112	PF00057.19	Ldl_recept_a	Repeat	1	37	37	37.8	1.6e-09	1	No_clan	sp|Q92673|SORL_HUMAN Sortilin-related receptor OS=Homo sapiens OX=9606 GN=SORL1 PE=1 SV=2
1932	Q92673	1117	1153	1115	1153	PF00057.19	Ldl_recept_a	Repeat	3	37	37	31.4	1.6e-07	1	No_clan	sp|Q92673|SORL_HUMAN Sortilin-related receptor OS=Homo sapiens OX=9606 GN=SORL1 PE=1 SV=2
1933	Q92673	1157	1192	1156	1192	PF00057.19	Ldl_recept_a	Repeat	2	37	37	48.6	6.7e-13	1	No_clan	sp|Q92673|SORL_HUMAN Sortilin-related receptor OS=Homo sapiens OX=9606 GN=SORL1 PE=1 SV=2
1934	Q92673	1198	1235	1197	1235	PF00057.19	Ldl_recept_a	Repeat	2	37	37	50.6	1.6e-13	1	No_clan	sp|Q92673|SORL_HUMAN Sortilin-related receptor OS=Homo sapiens OX=9606 GN=SORL1 PE=1 SV=2
1935	Q92673	1239	1271	1233	1271	PF00057.19	Ldl_recept_a	Repeat	5	37	37	39.2	5.8e-10	1	No_clan	sp|Q92673|SORL_HUMAN Sortilin-related receptor OS=Homo sapiens OX=9606 GN=SORL1 PE=1 SV=2
1936	Q92673	1325	1359	1323	1359	PF00057.19	Ldl_recept_a	Repeat	3	37	37	42.8	4.6e-11	1	No_clan	sp|Q92673|SORL_HUMAN Sortilin-related receptor OS=Homo sapiens OX=9606 GN=SORL1 PE=1 SV=2
1937	Q92673	1368	1403	1366	1403	PF00057.19	Ldl_recept_a	Repeat	3	37	37	42.9	4.1e-11	1	No_clan	sp|Q92673|SORL_HUMAN Sortilin-related receptor OS=Homo sapiens OX=9606 GN=SORL1 PE=1 SV=2
1938	Q92673	1417	1453	1417	1453	PF00057.19	Ldl_recept_a	Repeat	1	37	37	45.4	7e-12	1	No_clan	sp|Q92673|SORL_HUMAN Sortilin-related receptor OS=Homo sapiens OX=9606 GN=SORL1 PE=1 SV=2
1939	Q92673	1470	1506	1469	1506	PF00057.19	Ldl_recept_a	Repeat	2	37	37	35.4	9.2e-09	1	No_clan	sp|Q92673|SORL_HUMAN Sortilin-related receptor OS=Homo sapiens OX=9606 GN=SORL1 PE=1 SV=2
1940	Q92673	1513	1549	1512	1549	PF00057.19	Ldl_recept_a	Repeat	2	37	37	37	3e-09	1	No_clan	sp|Q92673|SORL_HUMAN Sortilin-related receptor OS=Homo sapiens OX=9606 GN=SORL1 PE=1 SV=2
1941	Q92673	1557	1629	1556	1633	PF00041.22	fn3	Domain	2	75	85	33.6	3.9e-08	1	CL0159	sp|Q92673|SORL_HUMAN Sortilin-related receptor OS=Homo sapiens OX=9606 GN=SORL1 PE=1 SV=2
1942	Q92673	1653	1735	1652	1735	PF00041.22	fn3	Domain	2	85	85	33.8	3.2e-08	1	CL0159	sp|Q92673|SORL_HUMAN Sortilin-related receptor OS=Homo sapiens OX=9606 GN=SORL1 PE=1 SV=2
1943	Q92673	1934	2008	1933	2014	PF00041.22	fn3	Domain	2	75	85	32	1.2e-07	1	CL0159	sp|Q92673|SORL_HUMAN Sortilin-related receptor OS=Homo sapiens OX=9606 GN=SORL1 PE=1 SV=2
1944	Q96DN2	142	179	142	179	PF07645.16	EGF_CA	Domain	1	42	42	26	7.8e-06	1	CL0001	sp|Q96DN2|VWCE_HUMAN von Willebrand factor C and EGF domain-containing protein OS=Homo sapiens OX=9606 GN=VWCE PE=1 SV=2
1945	Q96DN2	181	218	181	218	PF07645.16	EGF_CA	Domain	1	42	42	26.5	5.4e-06	1	CL0001	sp|Q96DN2|VWCE_HUMAN von Willebrand factor C and EGF domain-containing protein OS=Homo sapiens OX=9606 GN=VWCE PE=1 SV=2
1946	Q96DN2	220	261	220	261	PF07645.16	EGF_CA	Domain	1	42	42	36	6e-09	1	CL0001	sp|Q96DN2|VWCE_HUMAN von Willebrand factor C and EGF domain-containing protein OS=Homo sapiens OX=9606 GN=VWCE PE=1 SV=2
1947	Q96DN2	386	440	386	440	PF00093.19	VWC	Family	1	57	57	31.1	2.2e-07	1	CL0451	sp|Q96DN2|VWCE_HUMAN von Willebrand factor C and EGF domain-containing protein OS=Homo sapiens OX=9606 GN=VWCE PE=1 SV=2
1948	Q96DN2	501	559	501	559	PF00093.19	VWC	Family	1	57	57	34.4	2.1e-08	1	CL0451	sp|Q96DN2|VWCE_HUMAN von Willebrand factor C and EGF domain-containing protein OS=Homo sapiens OX=9606 GN=VWCE PE=1 SV=2
1949	Q96DN2	629	684	629	684	PF00093.19	VWC	Family	1	57	57	28.7	1.3e-06	1	CL0451	sp|Q96DN2|VWCE_HUMAN von Willebrand factor C and EGF domain-containing protein OS=Homo sapiens OX=9606 GN=VWCE PE=1 SV=2
1950	Q96DN2	687	742	687	742	PF00093.19	VWC	Family	1	57	57	28.4	1.6e-06	1	CL0451	sp|Q96DN2|VWCE_HUMAN von Willebrand factor C and EGF domain-containing protein OS=Homo sapiens OX=9606 GN=VWCE PE=1 SV=2
1951	P98161	71	126	69	127	PF13855.7	LRR_8	Repeat	5	60	61	40.7	1.5e-10	1	CL0022	sp|P98161|PKD1_HUMAN Polycystin-1 OS=Homo sapiens OX=9606 GN=PKD1 PE=1 SV=3
1952	P98161	180	252	180	261	PF01822.20	WSC	Domain	1	76	82	33.3	4.2e-08	1	No_clan	sp|P98161|PKD1_HUMAN Polycystin-1 OS=Homo sapiens OX=9606 GN=PKD1 PE=1 SV=3
1953	P98161	281	344	275	346	PF00801.21	PKD	Domain	5	69	71	39.7	3.2e-10	1	CL0159	sp|P98161|PKD1_HUMAN Polycystin-1 OS=Homo sapiens OX=9606 GN=PKD1 PE=1 SV=3
1954	P98161	426	531	425	532	PF00059.22	Lectin_C	Domain	2	107	108	32	1.7e-07	1	CL0056	sp|P98161|PKD1_HUMAN Polycystin-1 OS=Homo sapiens OX=9606 GN=PKD1 PE=1 SV=3
1955	P98161	856	921	855	922	PF00801.21	PKD	Domain	2	70	71	24.4	1.9e-05	1	CL0159	sp|P98161|PKD1_HUMAN Polycystin-1 OS=Homo sapiens OX=9606 GN=PKD1 PE=1 SV=3
1956	P98161	1024	1116	1024	1116	PF00801.21	PKD	Domain	1	71	71	83	1e-23	1	CL0159	sp|P98161|PKD1_HUMAN Polycystin-1 OS=Homo sapiens OX=9606 GN=PKD1 PE=1 SV=3
1957	P98161	1134	1201	1129	1202	PF00801.21	PKD	Domain	4	70	71	63.7	1.1e-17	1	CL0159	sp|P98161|PKD1_HUMAN Polycystin-1 OS=Homo sapiens OX=9606 GN=PKD1 PE=1 SV=3
1958	P98161	1222	1284	1216	1285	PF00801.21	PKD	Domain	7	70	71	48.6	5.6e-13	1	CL0159	sp|P98161|PKD1_HUMAN Polycystin-1 OS=Homo sapiens OX=9606 GN=PKD1 PE=1 SV=3
1959	P98161	1303	1369	1299	1370	PF00801.21	PKD	Domain	6	70	71	46.1	3.3e-12	1	CL0159	sp|P98161|PKD1_HUMAN Polycystin-1 OS=Homo sapiens OX=9606 GN=PKD1 PE=1 SV=3
1960	P98161	1386	1455	1385	1456	PF00801.21	PKD	Domain	2	70	71	53.1	2.2e-14	1	CL0159	sp|P98161|PKD1_HUMAN Polycystin-1 OS=Homo sapiens OX=9606 GN=PKD1 PE=1 SV=3
1961	P98161	1476	1537	1472	1538	PF00801.21	PKD	Domain	5	70	71	48.1	7.7e-13	1	CL0159	sp|P98161|PKD1_HUMAN Polycystin-1 OS=Homo sapiens OX=9606 GN=PKD1 PE=1 SV=3
1962	P98161	1553	1621	1553	1622	PF00801.21	PKD	Domain	1	70	71	52.9	2.6e-14	1	CL0159	sp|P98161|PKD1_HUMAN Polycystin-1 OS=Homo sapiens OX=9606 GN=PKD1 PE=1 SV=3
1963	P98161	1638	1707	1637	1708	PF00801.21	PKD	Domain	2	70	71	58.6	4.1e-16	1	CL0159	sp|P98161|PKD1_HUMAN Polycystin-1 OS=Homo sapiens OX=9606 GN=PKD1 PE=1 SV=3
1964	P98161	1723	1792	1723	1792	PF00801.21	PKD	Domain	1	71	71	49.5	2.9e-13	1	CL0159	sp|P98161|PKD1_HUMAN Polycystin-1 OS=Homo sapiens OX=9606 GN=PKD1 PE=1 SV=3
1965	P98161	1813	1877	1807	1877	PF00801.21	PKD	Domain	4	71	71	52.8	2.7e-14	1	CL0159	sp|P98161|PKD1_HUMAN Polycystin-1 OS=Homo sapiens OX=9606 GN=PKD1 PE=1 SV=3
1966	P98161	1893	1961	1892	1961	PF00801.21	PKD	Domain	2	71	71	46.1	3.2e-12	1	CL0159	sp|P98161|PKD1_HUMAN Polycystin-1 OS=Homo sapiens OX=9606 GN=PKD1 PE=1 SV=3
1967	P98161	1981	2050	1976	2051	PF00801.21	PKD	Domain	5	70	71	45.9	3.8e-12	1	CL0159	sp|P98161|PKD1_HUMAN Polycystin-1 OS=Homo sapiens OX=9606 GN=PKD1 PE=1 SV=3
1968	P98161	2068	2132	2063	2135	PF00801.21	PKD	Domain	5	68	71	70.3	9.1e-20	1	CL0159	sp|P98161|PKD1_HUMAN Polycystin-1 OS=Homo sapiens OX=9606 GN=PKD1 PE=1 SV=3
1969	P98161	2171	2614	2171	2614	PF02010.16	REJ	Family	1	451	451	385	4.8e-115	1	CL0159	sp|P98161|PKD1_HUMAN Polycystin-1 OS=Homo sapiens OX=9606 GN=PKD1 PE=1 SV=3
1970	P98161	3120	3223	3120	3231	PF01477.24	PLAT	Domain	1	108	117	73.9	1.6e-20	1	CL0321	sp|P98161|PKD1_HUMAN Polycystin-1 OS=Homo sapiens OX=9606 GN=PKD1 PE=1 SV=3
1971	P98161	3712	4112	3711	4113	PF08016.13	PKD_channel	Family	2	425	426	325.6	4e-97	1	CL0030	sp|P98161|PKD1_HUMAN Polycystin-1 OS=Homo sapiens OX=9606 GN=PKD1 PE=1 SV=3
1972	O75096	26	66	25	66	PF00057.19	Ldl_recept_a	Repeat	2	37	37	30.6	2.8e-07	1	No_clan	sp|O75096|LRP4_HUMAN Low-density lipoprotein receptor-related protein 4 OS=Homo sapiens OX=9606 GN=LRP4 PE=1 SV=4
1973	O75096	70	105	69	105	PF00057.19	Ldl_recept_a	Repeat	2	37	37	48.3	8.3e-13	1	No_clan	sp|O75096|LRP4_HUMAN Low-density lipoprotein receptor-related protein 4 OS=Homo sapiens OX=9606 GN=LRP4 PE=1 SV=4
1974	O75096	109	142	108	143	PF00057.19	Ldl_recept_a	Repeat	2	35	37	38.9	7.3e-10	1	No_clan	sp|O75096|LRP4_HUMAN Low-density lipoprotein receptor-related protein 4 OS=Homo sapiens OX=9606 GN=LRP4 PE=1 SV=4
1975	O75096	147	182	146	182	PF00057.19	Ldl_recept_a	Repeat	2	37	37	46.2	4e-12	1	No_clan	sp|O75096|LRP4_HUMAN Low-density lipoprotein receptor-related protein 4 OS=Homo sapiens OX=9606 GN=LRP4 PE=1 SV=4
1976	O75096	190	225	189	225	PF00057.19	Ldl_recept_a	Repeat	2	37	37	39.4	5.3e-10	1	No_clan	sp|O75096|LRP4_HUMAN Low-density lipoprotein receptor-related protein 4 OS=Homo sapiens OX=9606 GN=LRP4 PE=1 SV=4
1977	O75096	230	265	229	265	PF00057.19	Ldl_recept_a	Repeat	2	37	37	43.8	2.1e-11	1	No_clan	sp|O75096|LRP4_HUMAN Low-density lipoprotein receptor-related protein 4 OS=Homo sapiens OX=9606 GN=LRP4 PE=1 SV=4
1978	O75096	269	304	268	304	PF00057.19	Ldl_recept_a	Repeat	2	37	37	46.3	3.6e-12	1	No_clan	sp|O75096|LRP4_HUMAN Low-density lipoprotein receptor-related protein 4 OS=Homo sapiens OX=9606 GN=LRP4 PE=1 SV=4
1979	O75096	311	349	310	349	PF00057.19	Ldl_recept_a	Repeat	2	37	37	35.9	6.3e-09	1	No_clan	sp|O75096|LRP4_HUMAN Low-density lipoprotein receptor-related protein 4 OS=Homo sapiens OX=9606 GN=LRP4 PE=1 SV=4
1980	O75096	377	398	376	398	PF12662.8	cEGF	Domain	3	24	24	34.9	1e-08	1	CL0001	sp|O75096|LRP4_HUMAN Low-density lipoprotein receptor-related protein 4 OS=Homo sapiens OX=9606 GN=LRP4 PE=1 SV=4
1981	O75096	481	520	480	520	PF00058.18	Ldl_recept_b	Repeat	2	42	42	27.6	3e-06	1	CL0186	sp|O75096|LRP4_HUMAN Low-density lipoprotein receptor-related protein 4 OS=Homo sapiens OX=9606 GN=LRP4 PE=1 SV=4
1982	O75096	523	563	523	563	PF00058.18	Ldl_recept_b	Repeat	1	42	42	49.2	5.3e-13	1	CL0186	sp|O75096|LRP4_HUMAN Low-density lipoprotein receptor-related protein 4 OS=Homo sapiens OX=9606 GN=LRP4 PE=1 SV=4
1983	O75096	566	607	566	607	PF00058.18	Ldl_recept_b	Repeat	1	42	42	42	1e-10	1	CL0186	sp|O75096|LRP4_HUMAN Low-density lipoprotein receptor-related protein 4 OS=Homo sapiens OX=9606 GN=LRP4 PE=1 SV=4
1984	O75096	610	649	610	650	PF00058.18	Ldl_recept_b	Repeat	1	41	42	42.3	7.8e-11	1	CL0186	sp|O75096|LRP4_HUMAN Low-density lipoprotein receptor-related protein 4 OS=Homo sapiens OX=9606 GN=LRP4 PE=1 SV=4
1985	O75096	786	825	785	825	PF00058.18	Ldl_recept_b	Repeat	2	42	42	33.1	5.8e-08	1	CL0186	sp|O75096|LRP4_HUMAN Low-density lipoprotein receptor-related protein 4 OS=Homo sapiens OX=9606 GN=LRP4 PE=1 SV=4
1986	O75096	828	866	828	866	PF00058.18	Ldl_recept_b	Repeat	1	40	42	39.8	4.7e-10	1	CL0186	sp|O75096|LRP4_HUMAN Low-density lipoprotein receptor-related protein 4 OS=Homo sapiens OX=9606 GN=LRP4 PE=1 SV=4
1987	O75096	871	912	871	912	PF00058.18	Ldl_recept_b	Repeat	1	42	42	44.1	2.1e-11	1	CL0186	sp|O75096|LRP4_HUMAN Low-density lipoprotein receptor-related protein 4 OS=Homo sapiens OX=9606 GN=LRP4 PE=1 SV=4
1988	O75096	915	954	915	954	PF00058.18	Ldl_recept_b	Repeat	1	41	42	31	2.7e-07	1	CL0186	sp|O75096|LRP4_HUMAN Low-density lipoprotein receptor-related protein 4 OS=Homo sapiens OX=9606 GN=LRP4 PE=1 SV=4
1989	O75096	957	996	956	996	PF00058.18	Ldl_recept_b	Repeat	2	42	42	22.4	0.00013	1	CL0186	sp|O75096|LRP4_HUMAN Low-density lipoprotein receptor-related protein 4 OS=Homo sapiens OX=9606 GN=LRP4 PE=1 SV=4
1990	O75096	1006	1043	1006	1043	PF14670.7	FXa_inhibition	Domain	1	36	36	39.9	4e-10	1	CL0001	sp|O75096|LRP4_HUMAN Low-density lipoprotein receptor-related protein 4 OS=Homo sapiens OX=9606 GN=LRP4 PE=1 SV=4
1991	O75096	1093	1132	1093	1133	PF00058.18	Ldl_recept_b	Repeat	1	41	42	29.6	7.2e-07	1	CL0186	sp|O75096|LRP4_HUMAN Low-density lipoprotein receptor-related protein 4 OS=Homo sapiens OX=9606 GN=LRP4 PE=1 SV=4
1992	O75096	1136	1176	1136	1176	PF00058.18	Ldl_recept_b	Repeat	1	42	42	38.9	9.1e-10	1	CL0186	sp|O75096|LRP4_HUMAN Low-density lipoprotein receptor-related protein 4 OS=Homo sapiens OX=9606 GN=LRP4 PE=1 SV=4
1993	O75096	1179	1219	1179	1220	PF00058.18	Ldl_recept_b	Repeat	1	41	42	50.9	1.6e-13	1	CL0186	sp|O75096|LRP4_HUMAN Low-density lipoprotein receptor-related protein 4 OS=Homo sapiens OX=9606 GN=LRP4 PE=1 SV=4
1994	O75096	1313	1348	1313	1348	PF14670.7	FXa_inhibition	Domain	1	36	36	46.6	3e-12	1	CL0001	sp|O75096|LRP4_HUMAN Low-density lipoprotein receptor-related protein 4 OS=Homo sapiens OX=9606 GN=LRP4 PE=1 SV=4
1995	O75096	1397	1437	1397	1437	PF00058.18	Ldl_recept_b	Repeat	1	42	42	22.9	8.8e-05	1	CL0186	sp|O75096|LRP4_HUMAN Low-density lipoprotein receptor-related protein 4 OS=Homo sapiens OX=9606 GN=LRP4 PE=1 SV=4
1996	O75096	1440	1480	1440	1480	PF00058.18	Ldl_recept_b	Repeat	1	42	42	35.8	8.1e-09	1	CL0186	sp|O75096|LRP4_HUMAN Low-density lipoprotein receptor-related protein 4 OS=Homo sapiens OX=9606 GN=LRP4 PE=1 SV=4
1997	O75096	1483	1524	1483	1524	PF00058.18	Ldl_recept_b	Repeat	1	42	42	50.6	2e-13	1	CL0186	sp|O75096|LRP4_HUMAN Low-density lipoprotein receptor-related protein 4 OS=Homo sapiens OX=9606 GN=LRP4 PE=1 SV=4
1998	O75096	1527	1563	1527	1563	PF00058.18	Ldl_recept_b	Repeat	1	39	42	25.9	1e-05	1	CL0186	sp|O75096|LRP4_HUMAN Low-density lipoprotein receptor-related protein 4 OS=Homo sapiens OX=9606 GN=LRP4 PE=1 SV=4
1999	Q8IX30	33	68	33	68	PF12947.8	EGF_3	Domain	1	36	36	41.1	1.5e-10	1	CL0001	sp|Q8IX30|SCUB3_HUMAN Signal peptide, CUB and EGF-like domain-containing protein 3 OS=Homo sapiens OX=9606 GN=SCUBE3 PE=1 SV=1
[truncated: 9,856 more rows]

## Sheet: ALG6UGGT2 ko
ALG6/UGGT2-/-	Accesion	Alignment Start	Alignment End	Envelope Start	Envelope End	Hmm ACC	Hmm Name	Type	Hmm Start	Hmm End	Hmm Length	Bit Score	E-value	Significance	Clan	Protein_ID
1	Q04900	37	174	37	174	PF05283.12	MGC-24	Family	1	140	140	194.7	9.4e-58	1	No_clan	sp|Q04900|MUC24_HUMAN Sialomucin core protein 24 OS=Homo sapiens OX=9606 GN=CD164 PE=1 SV=2
2	Q9H3G5	47	445	42	446	PF00450.23	Peptidase_S10	Domain	7	415	416	350.6	1.7e-104	1	CL0028	sp|Q9H3G5|CPVL_HUMAN Probable serine carboxypeptidase CPVL OS=Homo sapiens OX=9606 GN=CPVL PE=1 SV=2
3	P12109	18	204	18	208	PF00092.29	VWA	Domain	1	171	175	103	2.1e-29	1	CL0128	sp|P12109|CO6A1_HUMAN Collagen alpha-1(VI) chain OS=Homo sapiens OX=9606 GN=COL6A1 PE=1 SV=3
4	P12109	238	292	234	294	PF01391.19	Collagen	Repeat	4	58	60	36.7	2.7e-09	1	No_clan	sp|P12109|CO6A1_HUMAN Collagen alpha-1(VI) chain OS=Homo sapiens OX=9606 GN=COL6A1 PE=1 SV=3
5	P12109	277	331	274	347	PF01391.19	Collagen	Repeat	4	58	60	31.7	9.7e-08	1	No_clan	sp|P12109|CO6A1_HUMAN Collagen alpha-1(VI) chain OS=Homo sapiens OX=9606 GN=COL6A1 PE=1 SV=3
6	P12109	337	395	328	404	PF01391.19	Collagen	Repeat	1	59	60	27.6	1.8e-06	1	No_clan	sp|P12109|CO6A1_HUMAN Collagen alpha-1(VI) chain OS=Homo sapiens OX=9606 GN=COL6A1 PE=1 SV=3
7	P12109	382	440	382	453	PF01391.19	Collagen	Repeat	1	59	60	28.3	1.1e-06	1	No_clan	sp|P12109|CO6A1_HUMAN Collagen alpha-1(VI) chain OS=Homo sapiens OX=9606 GN=COL6A1 PE=1 SV=3
8	P12109	431	488	430	498	PF01391.19	Collagen	Repeat	2	59	60	29	6.6e-07	1	No_clan	sp|P12109|CO6A1_HUMAN Collagen alpha-1(VI) chain OS=Homo sapiens OX=9606 GN=COL6A1 PE=1 SV=3
9	P12109	481	538	481	545	PF01391.19	Collagen	Repeat	1	59	60	31	1.6e-07	1	No_clan	sp|P12109|CO6A1_HUMAN Collagen alpha-1(VI) chain OS=Homo sapiens OX=9606 GN=COL6A1 PE=1 SV=3
10	P12109	596	741	596	765	PF00092.29	VWA	Domain	1	143	175	89.4	3.3e-25	1	CL0128	sp|P12109|CO6A1_HUMAN Collagen alpha-1(VI) chain OS=Homo sapiens OX=9606 GN=COL6A1 PE=1 SV=3
11	P12109	810	993	810	1000	PF00092.29	VWA	Domain	1	169	175	104.6	7.2e-30	1	CL0128	sp|P12109|CO6A1_HUMAN Collagen alpha-1(VI) chain OS=Homo sapiens OX=9606 GN=COL6A1 PE=1 SV=3
12	Q99538	12	268	12	269	PF01650.19	Peptidase_C13	Family	1	255	256	385.4	1.3e-115	1	CL0093	sp|Q99538|LGMN_HUMAN Legumain OS=Homo sapiens OX=9606 GN=LGMN PE=1 SV=1
13	P11717	87	225	83	230	PF00878.19	CIMR	Family	5	137	143	64.4	1.1e-17	1	CL0226	sp|P11717|MPRI_HUMAN Cation-independent mannose-6-phosphate receptor OS=Homo sapiens OX=9606 GN=IGF2R PE=1 SV=3
14	P11717	241	380	237	381	PF00878.19	CIMR	Family	5	142	143	67.4	1.4e-18	1	CL0226	sp|P11717|MPRI_HUMAN Cation-independent mannose-6-phosphate receptor OS=Homo sapiens OX=9606 GN=IGF2R PE=1 SV=3
15	P11717	383	533	383	533	PF00878.19	CIMR	Family	1	143	143	184.4	1.1e-54	1	CL0226	sp|P11717|MPRI_HUMAN Cation-independent mannose-6-phosphate receptor OS=Homo sapiens OX=9606 GN=IGF2R PE=1 SV=3
16	P11717	536	675	535	676	PF00878.19	CIMR	Family	2	142	143	136.9	4.9e-40	1	CL0226	sp|P11717|MPRI_HUMAN Cation-independent mannose-6-phosphate receptor OS=Homo sapiens OX=9606 GN=IGF2R PE=1 SV=3
17	P11717	683	835	680	836	PF00878.19	CIMR	Family	4	142	143	106	1.7e-30	1	CL0226	sp|P11717|MPRI_HUMAN Cation-independent mannose-6-phosphate receptor OS=Homo sapiens OX=9606 GN=IGF2R PE=1 SV=3
18	P11717	845	983	842	986	PF00878.19	CIMR	Family	4	136	143	29	9.7e-07	1	CL0226	sp|P11717|MPRI_HUMAN Cation-independent mannose-6-phosphate receptor OS=Homo sapiens OX=9606 GN=IGF2R PE=1 SV=3
19	P11717	992	1138	991	1138	PF00878.19	CIMR	Family	2	143	143	191.7	6.3e-57	1	CL0226	sp|P11717|MPRI_HUMAN Cation-independent mannose-6-phosphate receptor OS=Homo sapiens OX=9606 GN=IGF2R PE=1 SV=3
20	P11717	1143	1279	1139	1280	PF00878.19	CIMR	Family	5	142	143	48.8	7.6e-13	1	CL0226	sp|P11717|MPRI_HUMAN Cation-independent mannose-6-phosphate receptor OS=Homo sapiens OX=9606 GN=IGF2R PE=1 SV=3
21	P11717	1283	1422	1282	1422	PF00878.19	CIMR	Family	2	143	143	174.5	1.3e-51	1	CL0226	sp|P11717|MPRI_HUMAN Cation-independent mannose-6-phosphate receptor OS=Homo sapiens OX=9606 GN=IGF2R PE=1 SV=3
22	P11717	1426	1558	1425	1559	PF00878.19	CIMR	Family	2	142	143	78.3	6e-22	1	CL0226	sp|P11717|MPRI_HUMAN Cation-independent mannose-6-phosphate receptor OS=Homo sapiens OX=9606 GN=IGF2R PE=1 SV=3
23	P11717	1567	1693	1563	1710	PF00878.19	CIMR	Family	5	127	143	69	4.3e-19	1	CL0226	sp|P11717|MPRI_HUMAN Cation-independent mannose-6-phosphate receptor OS=Homo sapiens OX=9606 GN=IGF2R PE=1 SV=3
24	P11717	1718	1854	1715	1854	PF00878.19	CIMR	Family	4	143	143	66.8	2.1e-18	1	CL0226	sp|P11717|MPRI_HUMAN Cation-independent mannose-6-phosphate receptor OS=Homo sapiens OX=9606 GN=IGF2R PE=1 SV=3
25	P11717	1863	1902	1863	1902	PF00040.20	fn2	Domain	1	42	42	59.9	2.1e-16	1	CL0602	sp|P11717|MPRI_HUMAN Cation-independent mannose-6-phosphate receptor OS=Homo sapiens OX=9606 GN=IGF2R PE=1 SV=3
26	P11717	1909	2043	1906	2043	PF00878.19	CIMR	Family	4	143	143	68.3	7.4e-19	1	CL0226	sp|P11717|MPRI_HUMAN Cation-independent mannose-6-phosphate receptor OS=Homo sapiens OX=9606 GN=IGF2R PE=1 SV=3
27	P11717	2047	2192	2045	2193	PF00878.19	CIMR	Family	3	142	143	28	2e-06	1	CL0226	sp|P11717|MPRI_HUMAN Cation-independent mannose-6-phosphate receptor OS=Homo sapiens OX=9606 GN=IGF2R PE=1 SV=3
28	P11717	2200	2239	2197	2250	PF00878.19	CIMR	Family	4	44	143	24.6	2.2e-05	1	CL0226	sp|P11717|MPRI_HUMAN Cation-independent mannose-6-phosphate receptor OS=Homo sapiens OX=9606 GN=IGF2R PE=1 SV=3
29	P22413	106	141	106	143	PF01033.18	Somatomedin_B	Family	1	39	41	36.2	5.6e-09	1	No_clan	sp|P22413|ENPP1_HUMAN Ectonucleotide pyrophosphatase/phosphodiesterase family member 1 OS=Homo sapiens OX=9606 GN=ENPP1 PE=1 SV=2
30	P22413	147	186	147	187	PF01033.18	Somatomedin_B	Family	1	40	41	32.8	6.6e-08	1	No_clan	sp|P22413|ENPP1_HUMAN Ectonucleotide pyrophosphatase/phosphodiesterase family member 1 OS=Homo sapiens OX=9606 GN=ENPP1 PE=1 SV=2
31	P22413	212	538	212	538	PF01663.23	Phosphodiest	Family	1	357	357	305.4	7.7e-91	1	CL0088	sp|P22413|ENPP1_HUMAN Ectonucleotide pyrophosphatase/phosphodiesterase family member 1 OS=Homo sapiens OX=9606 GN=ENPP1 PE=1 SV=2
32	P22413	673	863	663	905	PF01223.24	Endonuclease_NS	Domain	18	195	226	39.7	4.8e-10	1	CL0263	sp|P22413|ENPP1_HUMAN Ectonucleotide pyrophosphatase/phosphodiesterase family member 1 OS=Homo sapiens OX=9606 GN=ENPP1 PE=1 SV=2
33	Q15904	282	428	281	428	PF05827.13	ATP-synt_S1	Family	2	144	144	181.4	8.1e-54	1	No_clan	sp|Q15904|VAS1_HUMAN V-type proton ATPase subunit S1 OS=Homo sapiens OX=9606 GN=ATP6AP1 PE=1 SV=2
34	O75976	40	340	34	341	PF00246.25	Peptidase_M14	Domain	7	286	287	231.4	1.9e-68	1	CL0035	sp|O75976|CBPD_HUMAN Carboxypeptidase D OS=Homo sapiens OX=9606 GN=CPD PE=1 SV=2
35	O75976	353	428	352	429	PF13620.7	CarboxypepD_reg	Domain	2	81	82	51.4	9.8e-14	1	CL0287	sp|O75976|CBPD_HUMAN Carboxypeptidase D OS=Homo sapiens OX=9606 GN=CPD PE=1 SV=2
36	O75976	479	751	478	753	PF00246.25	Peptidase_M14	Domain	2	285	287	274.3	1.6e-81	1	CL0035	sp|O75976|CBPD_HUMAN Carboxypeptidase D OS=Homo sapiens OX=9606 GN=CPD PE=1 SV=2
37	O75976	765	839	764	840	PF13620.7	CarboxypepD_reg	Domain	2	81	82	52.7	3.9e-14	1	CL0287	sp|O75976|CBPD_HUMAN Carboxypeptidase D OS=Homo sapiens OX=9606 GN=CPD PE=1 SV=2
38	O75976	910	1170	908	1172	PF00246.25	Peptidase_M14	Domain	3	285	287	170.1	9.5e-50	1	CL0035	sp|O75976|CBPD_HUMAN Carboxypeptidase D OS=Homo sapiens OX=9606 GN=CPD PE=1 SV=2
39	O75976	1184	1252	1183	1256	PF13620.7	CarboxypepD_reg	Domain	2	77	82	34.8	1.5e-08	1	CL0287	sp|O75976|CBPD_HUMAN Carboxypeptidase D OS=Homo sapiens OX=9606 GN=CPD PE=1 SV=2
40	P08069	21	130	21	131	PF01030.25	Recep_L_domain	Repeat	1	111	112	92.2	2.2e-26	1	CL0022	sp|P08069|IGF1R_HUMAN Insulin-like growth factor 1 receptor OS=Homo sapiens OX=9606 GN=IGF1R PE=1 SV=1
41	P08069	146	303	145	303	PF00757.21	Furin-like	Domain	2	149	149	132	1.6e-38	1	CL0547	sp|P08069|IGF1R_HUMAN Insulin-like growth factor 1 receptor OS=Homo sapiens OX=9606 GN=IGF1R PE=1 SV=1
42	P08069	322	430	322	436	PF01030.25	Recep_L_domain	Repeat	1	106	112	100.2	7.4e-29	1	CL0022	sp|P08069|IGF1R_HUMAN Insulin-like growth factor 1 receptor OS=Homo sapiens OX=9606 GN=IGF1R PE=1 SV=1
43	P08069	970	1235	969	1236	PF07714.18	PK_Tyr_Ser-Thr	Domain	2	258	259	312.9	1.4e-93	1	CL0016	sp|P08069|IGF1R_HUMAN Insulin-like growth factor 1 receptor OS=Homo sapiens OX=9606 GN=IGF1R PE=1 SV=1
44	Q6NUS6	68	368	68	368	PF07773.12	DUF1619	Family	1	317	317	266	7.1e-79	1	No_clan	sp|Q6NUS6|TECT3_HUMAN Tectonic-3 OS=Homo sapiens OX=9606 GN=TCTN3 PE=1 SV=2
45	O00469	627	711	620	712	PF03171.21	2OG-FeII_Oxy	Domain	6	100	101	25.7	1.2e-05	1	CL0029	sp|O00469|PLOD2_HUMAN Procollagen-lysine,2-oxoglutarate 5-dioxygenase 2 OS=Homo sapiens OX=9606 GN=PLOD2 PE=1 SV=2
46	Q8TEM1	1053	1126	1052	1128	PF02368.19	Big_2	Domain	2	78	79	58.2	5.8e-16	1	CL0159	sp|Q8TEM1|PO210_HUMAN Nuclear pore membrane glycoprotein 210 OS=Homo sapiens OX=9606 GN=NUP210 PE=1 SV=3
47	Q96AE7	297	326	295	328	PF13181.7	TPR_8	Repeat	3	32	34	15.3	0.017	1	CL0020	#N/A
48	Q96AE7	694	719	691	722	PF13181.7	TPR_8	Repeat	6	31	34	13.2	0.08	1	CL0020	#N/A
49	Q92820	14	226	14	226	PF07722.14	Peptidase_C26	Domain	1	216	216	84.7	7.3e-24	1	CL0014	sp|Q92820|GGH_HUMAN Gamma-glutamyl hydrolase OS=Homo sapiens OX=9606 GN=GGH PE=1 SV=2
50	Q9BTY2	3	337	1	337	PF01120.18	Alpha_L_fucos	Domain	11	350	350	421.7	2.9e-126	1	CL0058	sp|Q9BTY2|FUCO2_HUMAN Plasma alpha-L-fucosidase OS=Homo sapiens OX=9606 GN=FUCA2 PE=1 SV=2
51	Q9BTY2	348	436	348	436	PF16757.6	Fucosidase_C	Domain	1	90	90	109.3	1e-31	1	CL0369	sp|Q9BTY2|FUCO2_HUMAN Plasma alpha-L-fucosidase OS=Homo sapiens OX=9606 GN=FUCA2 PE=1 SV=2
52	P07602	7	38	6	38	PF02199.16	SapA	Family	2	33	33	55.5	4.7e-15	1	No_clan	sp|P07602|SAP_HUMAN Prosaposin OS=Homo sapiens OX=9606 GN=PSAP PE=1 SV=2
53	P07602	46	82	45	82	PF05184.16	SapB_1	Domain	2	38	38	49.7	2.8e-13	1	No_clan	sp|P07602|SAP_HUMAN Prosaposin OS=Homo sapiens OX=9606 GN=PSAP PE=1 SV=2
54	P07602	90	122	88	122	PF03489.18	SapB_2	Family	3	34	34	38	1.4e-09	1	No_clan	sp|P07602|SAP_HUMAN Prosaposin OS=Homo sapiens OX=9606 GN=PSAP PE=1 SV=2
55	P07602	180	218	180	218	PF05184.16	SapB_1	Domain	1	38	38	27.1	3.1e-06	1	No_clan	sp|P07602|SAP_HUMAN Prosaposin OS=Homo sapiens OX=9606 GN=PSAP PE=1 SV=2
56	P07602	223	255	223	255	PF03489.18	SapB_2	Family	1	34	34	39.6	4.7e-10	1	No_clan	sp|P07602|SAP_HUMAN Prosaposin OS=Homo sapiens OX=9606 GN=PSAP PE=1 SV=2
57	P07602	298	334	297	334	PF05184.16	SapB_1	Domain	2	38	38	45.7	5e-12	1	No_clan	sp|P07602|SAP_HUMAN Prosaposin OS=Homo sapiens OX=9606 GN=PSAP PE=1 SV=2
58	P07602	340	372	339	372	PF03489.18	SapB_2	Family	2	34	34	42.4	6.1e-11	1	No_clan	sp|P07602|SAP_HUMAN Prosaposin OS=Homo sapiens OX=9606 GN=PSAP PE=1 SV=2
59	P07602	392	428	391	428	PF05184.16	SapB_1	Domain	2	38	38	45.3	6.6e-12	1	No_clan	sp|P07602|SAP_HUMAN Prosaposin OS=Homo sapiens OX=9606 GN=PSAP PE=1 SV=2
60	P07602	433	466	433	466	PF03489.18	SapB_2	Family	1	34	34	36.5	4.2e-09	1	No_clan	sp|P07602|SAP_HUMAN Prosaposin OS=Homo sapiens OX=9606 GN=PSAP PE=1 SV=2
61	P07602	477	508	476	508	PF02199.16	SapA	Family	2	33	33	61.2	7.7e-17	1	No_clan	sp|P07602|SAP_HUMAN Prosaposin OS=Homo sapiens OX=9606 GN=PSAP PE=1 SV=2
62	Q08380	10	106	9	106	PF00530.19	SRCR	Domain	2	100	100	103.3	7.6e-30	1	CL0550	sp|Q08380|LG3BP_HUMAN Galectin-3-binding protein OS=Homo sapiens OX=9606 GN=LGALS3BP PE=1 SV=1
63	Q08380	243	340	242	342	PF07707.16	BACK	Domain	2	100	103	45.1	8.7e-12	1	CL0033	sp|Q08380|LG3BP_HUMAN Galectin-3-binding protein OS=Homo sapiens OX=9606 GN=LGALS3BP PE=1 SV=1
64	Q14126	142	239	141	240	PF00028.18	Cadherin	Domain	2	92	93	65.8	3.7e-18	1	CL0159	sp|Q14126|DSG2_HUMAN Desmoglein-2 OS=Homo sapiens OX=9606 GN=DSG2 PE=1 SV=2
65	Q14126	258	354	255	355	PF00028.18	Cadherin	Domain	5	92	93	41.4	1.4e-10	1	CL0159	sp|Q14126|DSG2_HUMAN Desmoglein-2 OS=Homo sapiens OX=9606 GN=DSG2 PE=1 SV=2
66	Q14126	378	467	373	467	PF00028.18	Cadherin	Domain	6	93	93	32.9	6.8e-08	1	CL0159	sp|Q14126|DSG2_HUMAN Desmoglein-2 OS=Homo sapiens OX=9606 GN=DSG2 PE=1 SV=2
67	Q8WTV0	16	462	16	463	PF01130.22	CD36	Family	1	464	465	522.4	8.7e-157	1	No_clan	sp|Q8WTV0|SCRB1_HUMAN Scavenger receptor class B member 1 OS=Homo sapiens OX=9606 GN=SCARB1 PE=1 SV=1
68	Q9UIW2	27	466	27	467	PF01403.20	Sema	Family	1	420	421	242.4	7.5e-72	1	No_clan	sp|Q9UIW2|PLXA1_HUMAN Plexin-A1 OS=Homo sapiens OX=9606 GN=PLXNA1 PE=1 SV=3
69	Q9UIW2	488	532	488	538	PF01437.26	PSI	Family	1	45	51	36.2	6.6e-09	1	CL0630	sp|Q9UIW2|PLXA1_HUMAN Plexin-A1 OS=Homo sapiens OX=9606 GN=PLXNA1 PE=1 SV=3
70	Q9UIW2	543	633	543	633	PF17960.2	TIG_plexin	Domain	1	89	89	67.1	9.5e-19	1	CL0159	sp|Q9UIW2|PLXA1_HUMAN Plexin-A1 OS=Homo sapiens OX=9606 GN=PLXNA1 PE=1 SV=3
71	Q9UIW2	687	781	687	781	PF18020.2	TIG_2	Domain	1	94	94	103.4	7.8e-30	1	CL0159	sp|Q9UIW2|PLXA1_HUMAN Plexin-A1 OS=Homo sapiens OX=9606 GN=PLXNA1 PE=1 SV=3
72	Q9UIW2	783	827	782	836	PF01437.26	PSI	Family	2	47	51	23.7	5.3e-05	1	CL0630	sp|Q9UIW2|PLXA1_HUMAN Plexin-A1 OS=Homo sapiens OX=9606 GN=PLXNA1 PE=1 SV=3
73	Q9UIW2	838	932	838	932	PF01833.25	TIG	Domain	1	85	85	36.2	4.8e-09	1	CL0159	sp|Q9UIW2|PLXA1_HUMAN Plexin-A1 OS=Homo sapiens OX=9606 GN=PLXNA1 PE=1 SV=3
74	Q9UIW2	935	1018	935	1018	PF01833.25	TIG	Domain	1	85	85	48.3	8.2e-13	1	CL0159	sp|Q9UIW2|PLXA1_HUMAN Plexin-A1 OS=Homo sapiens OX=9606 GN=PLXNA1 PE=1 SV=3
75	Q9UIW2	1022	1097	1022	1120	PF01833.25	TIG	Domain	1	62	85	37.2	2.3e-09	1	CL0159	sp|Q9UIW2|PLXA1_HUMAN Plexin-A1 OS=Homo sapiens OX=9606 GN=PLXNA1 PE=1 SV=3
76	Q9UIW2	1140	1202	1124	1211	PF01833.25	TIG	Domain	16	77	85	30.2	3.5e-07	1	CL0159	sp|Q9UIW2|PLXA1_HUMAN Plexin-A1 OS=Homo sapiens OX=9606 GN=PLXNA1 PE=1 SV=3
77	Q9UIW2	1292	1840	1292	1840	PF08337.13	Plexin_cytopl	Family	1	551	551	854.3	3.9e-257	1	No_clan	sp|Q9UIW2|PLXA1_HUMAN Plexin-A1 OS=Homo sapiens OX=9606 GN=PLXNA1 PE=1 SV=3
78	Q13740	110	203	110	204	PF08205.13	C2-set_2	Domain	1	88	89	72.4	2.3e-20	1	CL0011	sp|Q13740|CD166_HUMAN CD166 antigen OS=Homo sapiens OX=9606 GN=ALCAM PE=1 SV=2
79	Q13740	227	287	222	289	PF13927.7	Ig_3	Domain	6	76	79	32.8	8.1e-08	1	CL0011	sp|Q13740|CD166_HUMAN CD166 antigen OS=Homo sapiens OX=9606 GN=ALCAM PE=1 SV=2
80	P15586	5	342	5	342	PF00884.24	Sulfatase	Family	1	309	309	233.8	3.1e-69	1	CL0088	sp|P15586|GNS_HUMAN N-acetylglucosamine-6-sulfatase OS=Homo sapiens OX=9606 GN=GNS PE=1 SV=3
81	O15118	2	244	1	245	PF16414.6	NPC1_N	Domain	3	245	246	251.8	7.3e-75	1	CL0644	sp|O15118|NPC1_HUMAN NPC intracellular cholesterol transporter 1 OS=Homo sapiens OX=9606 GN=NPC1 PE=1 SV=2
82	O15118	628	780	627	781	PF12349.9	Sterol-sensing	Family	2	152	153	192.8	2.9e-57	1	CL0322	sp|O15118|NPC1_HUMAN NPC intracellular cholesterol transporter 1 OS=Homo sapiens OX=9606 GN=NPC1 PE=1 SV=2
83	O15118	1017	1228	1005	1231	PF02460.19	Patched	Family	608	808	811	107.6	5e-31	1	CL0322	sp|O15118|NPC1_HUMAN NPC intracellular cholesterol transporter 1 OS=Homo sapiens OX=9606 GN=NPC1 PE=1 SV=2
84	P38571	57	357	57	358	PF00561.21	Abhydrolase_1	Domain	1	256	257	139.8	1.2e-40	1	CL0028	sp|P38571|LICH_HUMAN Lysosomal acid lipase/cholesteryl ester hydrolase OS=Homo sapiens OX=9606 GN=LIPA PE=1 SV=2
85	P16278	17	333	17	334	PF01301.20	Glyco_hydro_35	Domain	1	315	316	411.6	2.7e-123	1	CL0058	sp|P16278|BGAL_HUMAN Beta-galactosidase OS=Homo sapiens OX=9606 GN=GLB1 PE=1 SV=2
86	P16278	525	596	505	599	PF13364.7	BetaGal_dom4_5	Domain	35	107	114	34.5	2.4e-08	1	CL0202	sp|P16278|BGAL_HUMAN Beta-galactosidase OS=Homo sapiens OX=9606 GN=GLB1 PE=1 SV=2
87	Q02809	622	708	619	709	PF03171.21	2OG-FeII_Oxy	Domain	4	100	101	27.1	4.6e-06	1	CL0029	sp|Q02809|PLOD1_HUMAN Procollagen-lysine,2-oxoglutarate 5-dioxygenase 1 OS=Homo sapiens OX=9606 GN=PLOD1 PE=1 SV=2
88	O94813	9	36	9	36	PF01462.19	LRRNT	Family	1	28	28	28.5	8.3e-07	1	No_clan	sp|O94813|SLIT2_HUMAN Slit homolog 2 protein OS=Homo sapiens OX=9606 GN=SLIT2 PE=1 SV=1
89	O94813	38	97	37	97	PF13855.7	LRR_8	Repeat	2	61	61	54.4	8.1e-15	1	CL0022	sp|O94813|SLIT2_HUMAN Slit homolog 2 protein OS=Homo sapiens OX=9606 GN=SLIT2 PE=1 SV=1
90	O94813	110	169	109	169	PF13855.7	LRR_8	Repeat	2	61	61	48	7.8e-13	1	CL0022	sp|O94813|SLIT2_HUMAN Slit homolog 2 protein OS=Homo sapiens OX=9606 GN=SLIT2 PE=1 SV=1
91	O94813	216	240	216	240	PF01463.25	LRRCT	Family	2	26	26	17.8	0.0036	1	No_clan	sp|O94813|SLIT2_HUMAN Slit homolog 2 protein OS=Homo sapiens OX=9606 GN=SLIT2 PE=1 SV=1
92	O94813	255	281	254	281	PF01462.19	LRRNT	Family	2	28	28	30.8	1.6e-07	1	No_clan	sp|O94813|SLIT2_HUMAN Slit homolog 2 protein OS=Homo sapiens OX=9606 GN=SLIT2 PE=1 SV=1
93	O94813	284	342	282	342	PF13855.7	LRR_8	Repeat	3	61	61	53	2.2e-14	1	CL0022	sp|O94813|SLIT2_HUMAN Slit homolog 2 protein OS=Homo sapiens OX=9606 GN=SLIT2 PE=1 SV=1
94	O94813	355	413	354	414	PF13855.7	LRR_8	Repeat	2	60	61	41.3	9.7e-11	1	CL0022	sp|O94813|SLIT2_HUMAN Slit homolog 2 protein OS=Homo sapiens OX=9606 GN=SLIT2 PE=1 SV=1
95	O94813	437	461	436	461	PF01463.25	LRRCT	Family	2	26	26	14.5	0.04	1	No_clan	sp|O94813|SLIT2_HUMAN Slit homolog 2 protein OS=Homo sapiens OX=9606 GN=SLIT2 PE=1 SV=1
96	O94813	519	563	516	569	PF13855.7	LRR_8	Repeat	5	48	61	31.2	1.4e-07	1	CL0022	sp|O94813|SLIT2_HUMAN Slit homolog 2 protein OS=Homo sapiens OX=9606 GN=SLIT2 PE=1 SV=1
97	O94813	589	647	589	648	PF13855.7	LRR_8	Repeat	2	60	61	48.8	4.5e-13	1	CL0022	sp|O94813|SLIT2_HUMAN Slit homolog 2 protein OS=Homo sapiens OX=9606 GN=SLIT2 PE=1 SV=1
98	O94813	670	695	670	695	PF01463.25	LRRCT	Family	1	26	26	13.5	0.082	1	No_clan	sp|O94813|SLIT2_HUMAN Slit homolog 2 protein OS=Homo sapiens OX=9606 GN=SLIT2 PE=1 SV=1
99	O94813	709	735	708	735	PF01462.19	LRRNT	Family	2	28	28	27.7	1.5e-06	1	No_clan	sp|O94813|SLIT2_HUMAN Slit homolog 2 protein OS=Homo sapiens OX=9606 GN=SLIT2 PE=1 SV=1
100	O94813	787	843	785	843	PF13855.7	LRR_8	Repeat	5	61	61	42.7	3.5e-11	1	CL0022	sp|O94813|SLIT2_HUMAN Slit homolog 2 protein OS=Homo sapiens OX=9606 GN=SLIT2 PE=1 SV=1
101	O94813	866	889	865	890	PF01463.25	LRRCT	Family	2	25	26	14.9	0.03	1	No_clan	sp|O94813|SLIT2_HUMAN Slit homolog 2 protein OS=Homo sapiens OX=9606 GN=SLIT2 PE=1 SV=1
102	O94813	904	934	904	935	PF00008.28	EGF	Domain	1	31	32	22.7	9e-05	1	CL0001	sp|O94813|SLIT2_HUMAN Slit homolog 2 protein OS=Homo sapiens OX=9606 GN=SLIT2 PE=1 SV=1
103	O94813	943	976	943	976	PF00008.28	EGF	Domain	1	32	32	26.6	5.6e-06	1	CL0001	sp|O94813|SLIT2_HUMAN Slit homolog 2 protein OS=Homo sapiens OX=9606 GN=SLIT2 PE=1 SV=1
104	O94813	984	1013	984	1014	PF00008.28	EGF	Domain	1	31	32	27.5	2.9e-06	1	CL0001	sp|O94813|SLIT2_HUMAN Slit homolog 2 protein OS=Homo sapiens OX=9606 GN=SLIT2 PE=1 SV=1
105	O94813	1022	1054	1022	1054	PF00008.28	EGF	Domain	1	32	32	30.4	3.5e-07	1	CL0001	sp|O94813|SLIT2_HUMAN Slit homolog 2 protein OS=Homo sapiens OX=9606 GN=SLIT2 PE=1 SV=1
106	O94813	1062	1091	1062	1092	PF00008.28	EGF	Domain	1	31	32	32.9	5.8e-08	1	CL0001	sp|O94813|SLIT2_HUMAN Slit homolog 2 protein OS=Homo sapiens OX=9606 GN=SLIT2 PE=1 SV=1
107	O94813	1112	1133	1112	1133	PF12661.8	hEGF	Domain	1	22	22	24.3	3.6e-05	1	CL0001	sp|O94813|SLIT2_HUMAN Slit homolog 2 protein OS=Homo sapiens OX=9606 GN=SLIT2 PE=1 SV=1
108	O94813	1170	1300	1170	1301	PF00054.24	Laminin_G_1	Domain	1	130	131	94.1	7.9e-27	1	CL0004	sp|O94813|SLIT2_HUMAN Slit homolog 2 protein OS=Homo sapiens OX=9606 GN=SLIT2 PE=1 SV=1
109	O94813	1323	1344	1323	1344	PF12661.8	hEGF	Domain	1	22	22	14.7	0.037	1	CL0001	sp|O94813|SLIT2_HUMAN Slit homolog 2 protein OS=Homo sapiens OX=9606 GN=SLIT2 PE=1 SV=1
110	Q6UWL2	44	83	44	86	PF07645.16	EGF_CA	Domain	1	39	42	33.9	2.8e-08	1	CL0001	sp|Q6UWL2|SUSD1_HUMAN Sushi domain-containing protein 1 OS=Homo sapiens OX=9606 GN=SUSD1 PE=1 SV=1
111	Q6UWL2	96	131	96	145	PF07645.16	EGF_CA	Domain	1	35	42	38.6	9.1e-10	1	CL0001	sp|Q6UWL2|SUSD1_HUMAN Sushi domain-containing protein 1 OS=Homo sapiens OX=9606 GN=SUSD1 PE=1 SV=1
112	Q6UWL2	150	205	150	205	PF00084.21	Sushi	Domain	1	56	56	29.4	9e-07	1	CL0001	sp|Q6UWL2|SUSD1_HUMAN Sushi domain-containing protein 1 OS=Homo sapiens OX=9606 GN=SUSD1 PE=1 SV=1
113	Q6UWL2	210	265	210	265	PF00084.21	Sushi	Domain	1	56	56	29.7	7.5e-07	1	CL0001	sp|Q6UWL2|SUSD1_HUMAN Sushi domain-containing protein 1 OS=Homo sapiens OX=9606 GN=SUSD1 PE=1 SV=1
114	Q6UWL2	581	710	577	717	PF18861.2	PTP_tm	Family	7	152	161	26.5	6e-06	1	No_clan	sp|Q6UWL2|SUSD1_HUMAN Sushi domain-containing protein 1 OS=Homo sapiens OX=9606 GN=SUSD1 PE=1 SV=1
115	P08236	17	202	16	202	PF02837.19	Glyco_hydro_2_N	Domain	2	169	169	63.1	2.9e-17	1	CL0202	sp|P08236|BGLR_HUMAN Beta-glucuronidase OS=Homo sapiens OX=9606 GN=GUSB PE=1 SV=2
116	P08236	204	305	204	305	PF00703.22	Glyco_hydro_2	Domain	1	110	110	27.9	3e-06	1	CL0159	sp|P08236|BGLR_HUMAN Beta-glucuronidase OS=Homo sapiens OX=9606 GN=GUSB PE=1 SV=2
117	P08236	307	608	307	609	PF02836.18	Glyco_hydro_2_C	Domain	1	301	302	392.2	1.4e-117	1	CL0058	sp|P08236|BGLR_HUMAN Beta-glucuronidase OS=Homo sapiens OX=9606 GN=GUSB PE=1 SV=2
118	Q8NAT1	250	391	162	395	PF04577.15	DUF563	Family	85	205	209	79.4	4e-22	1	No_clan	sp|Q8NAT1|PMGT2_HUMAN Protein O-linked-mannose beta-1,4-N-acetylglucosaminyltransferase 2 OS=Homo sapiens OX=9606 GN=POMGNT2 PE=1 SV=1
119	Q92542	16	190	16	190	PF18266.2	Ncstrn_small	Domain	1	170	170	199.3	4.3e-59	1	CL0035	sp|Q92542|NICA_HUMAN Nicastrin OS=Homo sapiens OX=9606 GN=NCSTN PE=1 SV=2
120	Q92542	241	466	241	466	PF05450.16	Nicastrin	Family	1	234	234	283.9	8.8e-85	1	CL0035	sp|Q92542|NICA_HUMAN Nicastrin OS=Homo sapiens OX=9606 GN=NCSTN PE=1 SV=2
121	Q92626	60	120	60	120	PF13855.7	LRR_8	Repeat	1	61	61	63.4	1.2e-17	1	CL0022	sp|Q92626|PXDN_HUMAN Peroxidasin homolog OS=Homo sapiens OX=9606 GN=PXDN PE=1 SV=2
122	Q92626	220	302	220	308	PF07679.17	I-set	Domain	1	84	90	66.2	2e-18	1	CL0011	sp|Q92626|PXDN_HUMAN Peroxidasin homolog OS=Homo sapiens OX=9606 GN=PXDN PE=1 SV=2
123	Q92626	316	403	316	403	PF07679.17	I-set	Domain	1	90	90	67	1.2e-18	1	CL0011	sp|Q92626|PXDN_HUMAN Peroxidasin homolog OS=Homo sapiens OX=9606 GN=PXDN PE=1 SV=2
124	Q92626	407	493	407	493	PF07679.17	I-set	Domain	1	90	90	79.9	1.1e-22	1	CL0011	sp|Q92626|PXDN_HUMAN Peroxidasin homolog OS=Homo sapiens OX=9606 GN=PXDN PE=1 SV=2
125	Q92626	499	585	499	585	PF07679.17	I-set	Domain	1	90	90	69.3	2.3e-19	1	CL0011	sp|Q92626|PXDN_HUMAN Peroxidasin homolog OS=Homo sapiens OX=9606 GN=PXDN PE=1 SV=2
126	Q92626	715	1263	715	1263	PF03098.16	An_peroxidase	Domain	1	528	528	630.9	1.7e-189	1	CL0617	sp|Q92626|PXDN_HUMAN Peroxidasin homolog OS=Homo sapiens OX=9606 GN=PXDN PE=1 SV=2
127	Q92626	1392	1444	1389	1444	PF00093.19	VWC	Family	3	57	57	36.5	4.4e-09	1	CL0451	sp|Q92626|PXDN_HUMAN Peroxidasin homolog OS=Homo sapiens OX=9606 GN=PXDN PE=1 SV=2
128	Q96AY3	30	121	29	121	PF00254.29	FKBP_C	Domain	2	94	94	97.6	4e-28	1	CL0487	sp|Q96AY3|FKB10_HUMAN Peptidyl-prolyl cis-trans isomerase FKBP10 OS=Homo sapiens OX=9606 GN=FKBP10 PE=1 SV=1
129	Q96AY3	142	233	141	233	PF00254.29	FKBP_C	Domain	2	94	94	96.6	8e-28	1	CL0487	sp|Q96AY3|FKB10_HUMAN Peptidyl-prolyl cis-trans isomerase FKBP10 OS=Homo sapiens OX=9606 GN=FKBP10 PE=1 SV=1
130	Q96AY3	256	345	253	345	PF00254.29	FKBP_C	Domain	4	94	94	89	1.9e-25	1	CL0487	sp|Q96AY3|FKB10_HUMAN Peptidyl-prolyl cis-trans isomerase FKBP10 OS=Homo sapiens OX=9606 GN=FKBP10 PE=1 SV=1
131	Q96AY3	367	457	366	457	PF00254.29	FKBP_C	Domain	2	94	94	82.1	2.6e-23	1	CL0487	sp|Q96AY3|FKB10_HUMAN Peptidyl-prolyl cis-trans isomerase FKBP10 OS=Homo sapiens OX=9606 GN=FKBP10 PE=1 SV=1
132	Q96AY3	479	499	477	500	PF13202.7	EF-hand_5	Domain	4	24	25	15.3	0.011	1	CL0220	sp|Q96AY3|FKB10_HUMAN Peptidyl-prolyl cis-trans isomerase FKBP10 OS=Homo sapiens OX=9606 GN=FKBP10 PE=1 SV=1
133	Q96AY3	522	542	521	543	PF13202.7	EF-hand_5	Domain	2	22	25	18.6	0.00092	1	CL0220	sp|Q96AY3|FKB10_HUMAN Peptidyl-prolyl cis-trans isomerase FKBP10 OS=Homo sapiens OX=9606 GN=FKBP10 PE=1 SV=1
134	Q8NBJ5	25	144	25	145	PF13704.7	Glyco_tranf_2_4	Family	1	95	96	67.7	1e-18	1	CL0110	sp|Q8NBJ5|GT251_HUMAN Procollagen galactosyltransferase 1 OS=Homo sapiens OX=9606 GN=COLGALT1 PE=1 SV=1
135	Q8NBJ5	305	488	304	489	PF01755.18	Glyco_transf_25	Family	2	199	200	115.1	3.7e-33	1	CL0110	sp|Q8NBJ5|GT251_HUMAN Procollagen galactosyltransferase 1 OS=Homo sapiens OX=9606 GN=COLGALT1 PE=1 SV=1
136	P06756	223	256	222	256	PF01839.24	FG-GAP	Repeat	2	37	37	31.8	1.2e-07	1	CL0186	sp|P06756|ITAV_HUMAN Integrin alpha-V OS=Homo sapiens OX=9606 GN=ITGAV PE=1 SV=2
137	P06756	276	317	276	318	PF01839.24	FG-GAP	Repeat	1	36	37	31.6	1.4e-07	1	CL0186	sp|P06756|ITAV_HUMAN Integrin alpha-V OS=Homo sapiens OX=9606 GN=ITGAV PE=1 SV=2
138	P06756	340	376	340	376	PF01839.24	FG-GAP	Repeat	1	37	37	29.2	7.6e-07	1	CL0186	sp|P06756|ITAV_HUMAN Integrin alpha-V OS=Homo sapiens OX=9606 GN=ITGAV PE=1 SV=2
139	P06756	437	884	437	884	PF08441.13	Integrin_alpha2	Family	1	467	467	417.5	7.3e-125	1	CL0159	sp|P06756|ITAV_HUMAN Integrin alpha-V OS=Homo sapiens OX=9606 GN=ITGAV PE=1 SV=2
140	P06756	987	1001	987	1001	PF00357.21	Integrin_alpha	Family	1	15	15	21.2	0.00019	1	No_clan	sp|P06756|ITAV_HUMAN Integrin alpha-V OS=Homo sapiens OX=9606 GN=ITGAV PE=1 SV=2
141	P05556	5	56	5	56	PF17205.4	PSI_integrin	Domain	1	46	46	45.9	3.3e-12	1	CL0630	sp|P05556|ITB1_HUMAN Integrin beta-1 OS=Homo sapiens OX=9606 GN=ITGB1 PE=1 SV=2
142	P05556	118	362	118	362	PF00362.19	Integrin_beta	Domain	1	248	248	383.8	3.8e-115	1	CL0128	sp|P05556|ITB1_HUMAN Integrin beta-1 OS=Homo sapiens OX=9606 GN=ITGB1 PE=1 SV=2
143	P05556	446	475	446	475	PF18372.2	I-EGF_1	Domain	1	29	29	43.1	2.9e-11	1	CL0001	sp|P05556|ITB1_HUMAN Integrin beta-1 OS=Homo sapiens OX=9606 GN=ITGB1 PE=1 SV=2
144	P05556	579	610	579	610	PF07974.14	EGF_2	Domain	1	32	32	25	1.9e-05	1	CL0001	sp|P05556|ITB1_HUMAN Integrin beta-1 OS=Homo sapiens OX=9606 GN=ITGB1 PE=1 SV=2
145	P05556	620	708	620	708	PF07965.13	Integrin_B_tail	Domain	1	85	85	75.2	4.4e-21	1	No_clan	sp|P05556|ITB1_HUMAN Integrin beta-1 OS=Homo sapiens OX=9606 GN=ITGB1 PE=1 SV=2
146	P05556	732	775	732	776	PF08725.12	Integrin_b_cyt	Domain	1	44	45	80.4	5.8e-23	1	No_clan	sp|P05556|ITB1_HUMAN Integrin beta-1 OS=Homo sapiens OX=9606 GN=ITGB1 PE=1 SV=2
147	P11047	15	249	15	249	PF00055.18	Laminin_N	Family	1	233	233	272.8	2.3e-81	1	CL0202	sp|P11047|LAMC1_HUMAN Laminin subunit gamma-1 OS=Homo sapiens OX=9606 GN=LAMC1 PE=1 SV=3
148	P11047	251	297	251	304	PF00053.25	Laminin_EGF	Domain	1	44	49	27.5	2.5e-06	1	CL0001	sp|P11047|LAMC1_HUMAN Laminin subunit gamma-1 OS=Homo sapiens OX=9606 GN=LAMC1 PE=1 SV=3
149	P11047	307	360	307	360	PF00053.25	Laminin_EGF	Domain	1	49	49	28.3	1.5e-06	1	CL0001	sp|P11047|LAMC1_HUMAN Laminin subunit gamma-1 OS=Homo sapiens OX=9606 GN=LAMC1 PE=1 SV=3
150	P11047	363	407	363	407	PF00053.25	Laminin_EGF	Domain	1	49	49	38.4	1e-09	1	CL0001	sp|P11047|LAMC1_HUMAN Laminin subunit gamma-1 OS=Homo sapiens OX=9606 GN=LAMC1 PE=1 SV=3
151	P11047	410	457	410	457	PF00053.25	Laminin_EGF	Domain	1	49	49	44.9	9.6e-12	1	CL0001	sp|P11047|LAMC1_HUMAN Laminin subunit gamma-1 OS=Homo sapiens OX=9606 GN=LAMC1 PE=1 SV=3
152	P11047	523	653	523	653	PF00052.19	Laminin_B	Family	1	135	135	103.8	6.3e-30	1	CL0202	sp|P11047|LAMC1_HUMAN Laminin subunit gamma-1 OS=Homo sapiens OX=9606 GN=LAMC1 PE=1 SV=3
153	P11047	689	735	689	736	PF00053.25	Laminin_EGF	Domain	1	49	49	39.1	6e-10	1	CL0001	sp|P11047|LAMC1_HUMAN Laminin subunit gamma-1 OS=Homo sapiens OX=9606 GN=LAMC1 PE=1 SV=3
154	P11047	738	781	737	788	PF00053.25	Laminin_EGF	Domain	1	43	49	21.7	0.00017	1	CL0001	sp|P11047|LAMC1_HUMAN Laminin subunit gamma-1 OS=Homo sapiens OX=9606 GN=LAMC1 PE=1 SV=3
155	P11047	793	846	793	846	PF00053.25	Laminin_EGF	Domain	1	49	49	35.5	8.2e-09	1	CL0001	sp|P11047|LAMC1_HUMAN Laminin subunit gamma-1 OS=Homo sapiens OX=9606 GN=LAMC1 PE=1 SV=3
156	P11047	849	897	849	897	PF00053.25	Laminin_EGF	Domain	1	49	49	39.2	5.6e-10	1	CL0001	sp|P11047|LAMC1_HUMAN Laminin subunit gamma-1 OS=Homo sapiens OX=9606 GN=LAMC1 PE=1 SV=3
157	P11047	900	945	900	945	PF00053.25	Laminin_EGF	Domain	1	49	49	38.7	8.4e-10	1	CL0001	sp|P11047|LAMC1_HUMAN Laminin subunit gamma-1 OS=Homo sapiens OX=9606 GN=LAMC1 PE=1 SV=3
158	P11047	948	993	948	999	PF00053.25	Laminin_EGF	Domain	1	49	49	27.7	2.3e-06	1	CL0001	sp|P11047|LAMC1_HUMAN Laminin subunit gamma-1 OS=Homo sapiens OX=9606 GN=LAMC1 PE=1 SV=3
159	P06213	25	136	25	137	PF01030.25	Recep_L_domain	Repeat	1	111	112	88.6	2.8e-25	1	CL0022	sp|P06213|INSR_HUMAN Insulin receptor OS=Homo sapiens OX=9606 GN=INSR PE=1 SV=4
160	P06213	152	313	152	313	PF00757.21	Furin-like	Domain	1	149	149	124.3	3.5e-36	1	CL0547	sp|P06213|INSR_HUMAN Insulin receptor OS=Homo sapiens OX=9606 GN=INSR PE=1 SV=4
161	P06213	332	442	332	446	PF01030.25	Recep_L_domain	Repeat	1	107	112	100.5	5.8e-29	1	CL0022	sp|P06213|INSR_HUMAN Insulin receptor OS=Homo sapiens OX=9606 GN=INSR PE=1 SV=4
162	P06213	913	960	913	960	PF17870.2	Insulin_TMD	Domain	1	47	47	72.9	1.7e-20	1	No_clan	sp|P06213|INSR_HUMAN Insulin receptor OS=Homo sapiens OX=9606 GN=INSR PE=1 SV=4
163	P06213	997	1263	996	1263	PF07714.18	PK_Tyr_Ser-Thr	Domain	2	259	259	316.8	9.5e-95	1	CL0016	sp|P06213|INSR_HUMAN Insulin receptor OS=Homo sapiens OX=9606 GN=INSR PE=1 SV=4
164	Q13308	6	74	2	75	PF13927.7	Ig_3	Domain	6	78	79	33.1	6.3e-08	1	CL0011	sp|Q13308|PTK7_HUMAN Inactive tyrosine-protein kinase 7 OS=Homo sapiens OX=9606 GN=PTK7 PE=1 SV=2
165	Q13308	98	173	98	174	PF13927.7	Ig_3	Domain	2	78	79	49.7	4.1e-13	1	CL0011	sp|Q13308|PTK7_HUMAN Inactive tyrosine-protein kinase 7 OS=Homo sapiens OX=9606 GN=PTK7 PE=1 SV=2
166	Q13308	197	272	196	274	PF13927.7	Ig_3	Domain	4	76	79	37.4	3e-09	1	CL0011	sp|Q13308|PTK7_HUMAN Inactive tyrosine-protein kinase 7 OS=Homo sapiens OX=9606 GN=PTK7 PE=1 SV=2
167	Q13308	317	378	298	378	PF07679.17	I-set	Domain	25	90	90	33.3	3.9e-08	1	CL0011	sp|Q13308|PTK7_HUMAN Inactive tyrosine-protein kinase 7 OS=Homo sapiens OX=9606 GN=PTK7 PE=1 SV=2
168	Q13308	385	468	382	468	PF07679.17	I-set	Domain	4	90	90	45.3	6.7e-12	1	CL0011	sp|Q13308|PTK7_HUMAN Inactive tyrosine-protein kinase 7 OS=Homo sapiens OX=9606 GN=PTK7 PE=1 SV=2
169	Q13308	476	544	473	544	PF13927.7	Ig_3	Domain	6	79	79	43.4	3.9e-11	1	CL0011	sp|Q13308|PTK7_HUMAN Inactive tyrosine-protein kinase 7 OS=Homo sapiens OX=9606 GN=PTK7 PE=1 SV=2
170	Q13308	563	649	562	651	PF07679.17	I-set	Domain	2	88	90	49.3	3.9e-13	1	CL0011	sp|Q13308|PTK7_HUMAN Inactive tyrosine-protein kinase 7 OS=Homo sapiens OX=9606 GN=PTK7 PE=1 SV=2
171	Q13308	769	1031	766	1031	PF07714.18	PK_Tyr_Ser-Thr	Domain	4	259	259	279.2	2.9e-83	1	CL0016	sp|Q13308|PTK7_HUMAN Inactive tyrosine-protein kinase 7 OS=Homo sapiens OX=9606 GN=PTK7 PE=1 SV=2
172	O94898	144	192	144	194	PF13855.7	LRR_8	Repeat	1	50	61	39.9	2.6e-10	1	CL0022	sp|O94898|LRIG2_HUMAN Leucine-rich repeats and immunoglobulin-like domains protein 2 OS=Homo sapiens OX=9606 GN=LRIG2 PE=1 SV=3
173	O94898	240	299	240	299	PF13855.7	LRR_8	Repeat	2	61	61	54.9	5.4e-15	1	CL0022	sp|O94898|LRIG2_HUMAN Leucine-rich repeats and immunoglobulin-like domains protein 2 OS=Homo sapiens OX=9606 GN=LRIG2 PE=1 SV=3
174	O94898	312	371	311	371	PF13855.7	LRR_8	Repeat	2	61	61	54.5	7.5e-15	1	CL0022	sp|O94898|LRIG2_HUMAN Leucine-rich repeats and immunoglobulin-like domains protein 2 OS=Homo sapiens OX=9606 GN=LRIG2 PE=1 SV=3
175	O94898	387	441	386	445	PF13855.7	LRR_8	Repeat	2	57	61	42.1	5.4e-11	1	CL0022	sp|O94898|LRIG2_HUMAN Leucine-rich repeats and immunoglobulin-like domains protein 2 OS=Homo sapiens OX=9606 GN=LRIG2 PE=1 SV=3
176	O94898	470	493	468	493	PF01463.25	LRRCT	Family	3	26	26	18.8	0.0017	1	No_clan	sp|O94898|LRIG2_HUMAN Leucine-rich repeats and immunoglobulin-like domains protein 2 OS=Homo sapiens OX=9606 GN=LRIG2 PE=1 SV=3
177	O94898	497	584	497	584	PF13927.7	Ig_3	Domain	1	79	79	49.1	6.5e-13	1	CL0011	sp|O94898|LRIG2_HUMAN Leucine-rich repeats and immunoglobulin-like domains protein 2 OS=Homo sapiens OX=9606 GN=LRIG2 PE=1 SV=3
178	O94898	602	692	602	692	PF07679.17	I-set	Domain	1	90	90	71.9	3.5e-20	1	CL0011	sp|O94898|LRIG2_HUMAN Leucine-rich repeats and immunoglobulin-like domains protein 2 OS=Homo sapiens OX=9606 GN=LRIG2 PE=1 SV=3
179	O94898	696	783	696	783	PF07679.17	I-set	Domain	1	90	90	51.3	9e-14	1	CL0011	sp|O94898|LRIG2_HUMAN Leucine-rich repeats and immunoglobulin-like domains protein 2 OS=Homo sapiens OX=9606 GN=LRIG2 PE=1 SV=3
180	Q9NYU2	15	192	15	196	PF18400.2	Thioredoxin_12	Domain	1	187	191	182.8	6.1e-54	1	CL0172	sp|Q9NYU2|UGGG1_HUMAN UDP-glucose:glycoprotein glucosyltransferase 1 OS=Homo sapiens OX=9606 GN=UGGT1 PE=1 SV=3
181	Q9NYU2	270	399	268	408	PF18401.2	Thioredoxin_13	Domain	3	128	136	123.3	6.1e-36	1	CL0172	sp|Q9NYU2|UGGG1_HUMAN UDP-glucose:glycoprotein glucosyltransferase 1 OS=Homo sapiens OX=9606 GN=UGGT1 PE=1 SV=3
182	Q9NYU2	409	657	409	657	PF18402.2	Thioredoxin_14	Domain	1	252	252	222.1	1.1e-65	1	CL0172	sp|Q9NYU2|UGGG1_HUMAN UDP-glucose:glycoprotein glucosyltransferase 1 OS=Homo sapiens OX=9606 GN=UGGT1 PE=1 SV=3
183	Q9NYU2	684	913	680	913	PF18403.2	Thioredoxin_15	Domain	5	214	214	213.7	2.8e-63	1	CL0172	sp|Q9NYU2|UGGG1_HUMAN UDP-glucose:glycoprotein glucosyltransferase 1 OS=Homo sapiens OX=9606 GN=UGGT1 PE=1 SV=3
184	Q9NYU2	1073	1179	1073	1180	PF06427.12	UDP-g_GGTase	Domain	1	108	109	132.6	5.9e-39	1	CL0110	sp|Q9NYU2|UGGG1_HUMAN UDP-glucose:glycoprotein glucosyltransferase 1 OS=Homo sapiens OX=9606 GN=UGGT1 PE=1 SV=3
185	Q9NYU2	1214	1481	1214	1481	PF18404.2	Glyco_transf_24	Domain	1	268	268	491	8.3e-148	1	CL0110	sp|Q9NYU2|UGGG1_HUMAN UDP-glucose:glycoprotein glucosyltransferase 1 OS=Homo sapiens OX=9606 GN=UGGT1 PE=1 SV=3
186	P04066	4	340	1	340	PF01120.18	Alpha_L_fucos	Domain	8	350	350	415.7	1.8e-124	1	CL0058	sp|P04066|FUCO_HUMAN Tissue alpha-L-fucosidase OS=Homo sapiens OX=9606 GN=FUCA1 PE=1 SV=4
187	P04066	351	436	351	436	PF16757.6	Fucosidase_C	Domain	1	90	90	88.3	3.9e-25	1	CL0369	sp|P04066|FUCO_HUMAN Tissue alpha-L-fucosidase OS=Homo sapiens OX=9606 GN=FUCA1 PE=1 SV=4
188	Q5ZPR3	7	96	4	110	PF07686.18	V-set	Domain	3	92	109	30.6	3.1e-07	1	CL0011	sp|Q5ZPR3|CD276_HUMAN CD276 antigen OS=Homo sapiens OX=9606 GN=CD276 PE=1 SV=1
189	Q5ZPR3	116	196	116	196	PF13927.7	Ig_3	Domain	1	79	79	36.3	6.4e-09	1	CL0011	sp|Q5ZPR3|CD276_HUMAN CD276 antigen OS=Homo sapiens OX=9606 GN=CD276 PE=1 SV=1
190	Q5ZPR3	225	314	222	328	PF07686.18	V-set	Domain	3	92	109	31.6	1.5e-07	1	CL0011	sp|Q5ZPR3|CD276_HUMAN CD276 antigen OS=Homo sapiens OX=9606 GN=CD276 PE=1 SV=1
191	Q5ZPR3	334	414	334	414	PF13927.7	Ig_3	Domain	1	79	79	34.7	2e-08	1	CL0011	sp|Q5ZPR3|CD276_HUMAN CD276 antigen OS=Homo sapiens OX=9606 GN=CD276 PE=1 SV=1
192	P08581	33	467	30	469	PF01403.20	Sema	Family	4	419	421	167.2	5e-49	1	No_clan	sp|P08581|MET_HUMAN Hepatocyte growth factor receptor OS=Homo sapiens OX=9606 GN=MET PE=1 SV=4
193	P08581	496	535	495	538	PF01437.26	PSI	Family	2	48	51	23.6	5.6e-05	1	CL0630	sp|P08581|MET_HUMAN Hepatocyte growth factor receptor OS=Homo sapiens OX=9606 GN=MET PE=1 SV=4
[truncated: 143 more rows]

## Sheet: ALG6 UGGT1ko
ALG/UGGT1-/-	Accesion	Alignment Start	Alignment End	Envelope Start	Envelope End	Hmm ACC	Hmm Name	Type	Hmm Start	Hmm End	Hmm Length	Bit Score	E-value	Significance	Clan	Protein_ID
[truncated: 121 more rows]

[truncated: 1 more sheets: ALG6 ko]
