# Supplementary material for: Quantitative glycoproteomics reveals cellular substrate selectivity of the ER protein quality control sensors UGGT1 and UGGT2
Source: eLife. 2020 Dec 15;9:e63997. doi: 10.7554/eLife.63997 (PMC7771966; doi:10.7554/eLife.63997)
Supplement: Supplementary file 3. [file elife-63997-supp3.xlsx]

## Sheet: Sheet1
Protein	ALG6-/-	ALG6/UGGT2-/-	ALG6/UGGT1-/-	Map of the cell percentile (Itzhak et al. 2016)	Compartive results of TMT mass spectrometry quantifications between cell lines. TMT quantifications for each cell line can be found in Figure 1-source data 1 and Figure 2-source data 1
CD164	Undefined	1	Below cutoff	12.7	Definitions
Vitellogenic carboxypeptidase-like protein	Undefined	2	12	NA	Undefined- Found in one biological replicate but not in the other
Collagen alpha-1 (VI)	7	3	Below cutoff	17.9	Below cutoff- Below the applied 3-fold cutoff
Legumain	Undefined	4	28	30.1	NA- Not found
CI Man-6-P	10	5	27	71.3
ENPP1	18	6	14	NA
V-type proton pump	2	7	30	62
Carboxypeptidase D	14	8	26	57.4
IGF1R	9	9	Below cutoff	42.3
Tectonic 3	12	10	Below cutoff	10.6
PLOD2	26	11	33	80
Nuclear Pore membrane glycoprotein	22	12	Below cutoff	75.3
TTC17	Undefined	13	10	24.4
Gamma glutamyl hydrolase	25	14	8	78.6
FUCA2	3	15	14	42.1
Prosaposin	16	16	Below cutoff	73.8
Galectin 3 Binding protein	15	17	5	77
Desmoglein-2	5	18	Below cutoff	80.8
Scavenger receptor class B member 1	Undefined	19	26	75
Plexin-A1	Undefined	20	Below cutoff	NA
CD166 antigen	Undefined	21	Below cutoff	8.6
N-acetylglucosamine-6-sulfatase	20	22	9	67.2
NPC intracellular cholesterol transporter 1	17	23	Below cutoff	33.2
Lysosomal acid lipase	Undefined	24	20	28.1
Beta galactosidase	8	25	8	56.8
PLOD1	30	26	17	77
Slit homolog 2 prt	19	27	Below cutoff	NA
Sushi domain-containing protein 1	Undefined	28	Below cutoff	NA
Beta-glucuronidase	Undefined	29	24	52.6
POMGNT2	Undefined	30	32	7.5
Nicastrin	11	31	Below cutoff	64.3
vascular peroxidase 1	32	32	11	43.6
FKBP-10	24	33	Below cutoff	85.1
Procollagen galactosyltransferase 1	Undefined	34	Below cutoff	77.7
Integrin alpha-V	Undefined	35	Below cutoff	72.4
Integrin beta-1	1	36	19	88.9
Laminin subunit gamma-1	13	37	Below cutoff	52.9
Insulin Receptor	23	38	Below cutoff	32.8
Inactive tyrosine-protein kinase 7	35	39	Below cutoff	NA
LIG2	Undefined	40	22	0.9
UGGT1	Undefined	41	Below cutoff	75.4
FUCA1	Undefined	42	6	6.9
CD276 antigen	Undefined	43	Below cutoff	59.6
Hepatocyte growth factor receptor	27	44	24	NA
Laminin subunit alpha-1	Undefined	45	18	44
Leucyl-cystinyl aminopeptidase	Undefined	46	Below cutoff	50.6
ERFAD	Undefined	47	32	26.4
Transferrin receptor protein 1	Undefined	48	Below cutoff	96.5
Alpha-galactosidase A	31	49	5	40.2
Agrin	Undefined	50	Below cutoff	39.7
Beta-hexosaminidase subunit alpha	36	51	17	76.8
Protein O-glucosyltransferase 3	Undefined	52	Below cutoff	NA
Phospholipase B domain-containing protein 2	Undefined	53	Below cutoff	43.7
Lysosomal acid glucosylceramidase	28	54	Below cutoff	71.5
LAMP2	Undefined	55	Below cutoff	68.4
Hypoxia up-regulated protein 1 (GRP170)	Undefined	56	Below cutoff	88.6
Cathepsin D	Undefined	57	Below cutoff	77.5
Contactin-associated protein 1	Below cutoff	58	Below cutoff	NA
Alpha-N-acetylglucosaminidase	Below cutoff	59	Below cutoff	26.5
CERCAM	Undefined	60	15	14.8
5'-3' exonuclease PLD3	33	61	Below cutoff	47.1
Endothelin-converting enzyme 1	Undefined	62	Below cutoff	49.4
Lysosomal alpha-mannosidase	Undefined	63	Below cutoff	45.6
Fibrillin-2	4	64	Below cutoff	NA
ERO1-like protein beta	6	65	Below cutoff	NA
Tripeptidyl-peptidase 1	34	66	21	51.8
Arylsulfatase A	Undefined	Below cutoff	1	19.2
Beta-hexosaminidase subunit beta	29	Below cutoff	2	78.5
Alpha-N-acetylgalactosaminidase	Undefined	Below cutoff	3	36.6
Prolow-density lipoprotein receptor-related protein 1	21	Below cutoff	Below cutoff	22
Laminin subunit beta-2	37	Below cutoff	Below cutoff	11.8
