# Supplementary material for: Quantitative glycoproteomics reveals cellular substrate selectivity of the ER protein quality control sensors UGGT1 and UGGT2
Source: eLife. 2020 Dec 15;9:e63997. doi: 10.7554/eLife.63997 (PMC7771966; doi:10.7554/eLife.63997)
Supplement: Supplementary file 4. [file elife-63997-supp4.csv]

Gene	ALG6-/- Bio Rep 1	ALG6-/- Bio Rep 2	ALG6-/- Bio Rep 3	ALG6/UGGT1-/- Bio Rep 1	ALG6/UGGT1-/- Bio Rep 2	ALG6/UGGT1-/- Bio Rep 3	ALG6/UGGT2-/- Bio Rep 1	ALG6/UGGT2-/- Bio Rep 2	ALG6/UGGT2-/- Bio Rep 3	ALG6/UGGT1/UGGT2-/- Bio Rep 1	ALG6/UGGT1/UGGT2-/- Bio Rep 2	ALG6/UGGT1/UGGT2-/- Bio Rep 3	WT Bio Rep 1	WT Bio Rep 2	WT Bio Rep 3	Results of RNAseq experiment as described in the materials and methods section of the main text. Data are presented as normalized counts per million.
MT-CO1	24731.46111	31174.71684	30063.94966	19497.54263	16463.22394	16863.07095	26071.1409	22685.98476	21547.41974	22315.19104	23565.15697	23331.02841	21281.20949	21149.14614	25274.00686
EEF1A1	19745.17683	16259.14	17812.65895	14889.59089	10864.01211	11830.07596	19945.63735	18156.32108	18670.05107	19691.21743	17650.78253	18508.55609	16406.04659	16645.01115	20422.63999
MT-CO2	6428.776814	8120.924271	7984.798201	7756.956488	7289.384835	7266.482973	10882.92514	9761.517975	8907.49336	8152.836359	8680.109185	8273.380032	7321.389388	7505.894428	8933.986971
MT-RNR2	11253.95394	11906.56625	12176.21563	8677.79129	7169.27873	7326.823862	9089.031763	8283.23705	8216.208539	7951.955118	7905.358687	7453.7875	8363.579503	8463.744463	9970.038885
EEF2	12331.29991	16419.50979	14581.15705	4975.950217	4727.108272	4481.693259	7935.51718	6921.312355	6537.079845	9918.254838	10331.79461	10356.85718	7049.573041	7465.073712	8173.103293
RPS2	8752.613073	11446.77496	9519.497916	7214.817374	6510.701465	6699.628647	7163.655219	6332.407355	6209.598471	5799.704847	5902.567794	5838.314654	6303.52563	6530.212392	8528.738481
MT-ND4	9881.534327	11154.98163	11938.08837	6265.664896	5671.789733	5341.143222	7092.794883	6947.392199	6416.770259	6069.627847	6295.95915	6175.121749	6879.647615	6981.680853	6408.737658
MT-CO3	5607.489833	7245.671407	6789.483742	5914.111404	4790.531152	4875.440432	6692.080641	6074.720476	5424.963978	5155.15431	5327.286215	5187.086669	5540.791268	5752.650572	6924.787864
MT-ATP6	4332.970371	5216.849508	5226.367492	4465.316672	3990.7176	3941.046846	5414.875619	5061.332228	4580.776821	5088.684577	5214.736076	5110.826538	4628.517706	4748.232641	5098.794762
MT-CYB	1733.123528	1969.276563	2161.145748	4315.843511	3947.450963	3833.535849	4682.626686	4279.632899	3835.844103	3671.938085	3838.177902	3650.66755	4335.229476	4296.606723	4505.470738
MT-ND5	3151.383357	3803.781477	4120.811231	2884.54255	2851.925896	2614.268032	4083.9619	3715.784202	3357.596986	3425.176552	3627.167139	3587.60397	3776.156327	3790.067692	3327.803376
RPL8	4153.607918	5402.054574	4646.041454	3722.229917	3399.474163	3422.406362	4066.504664	3629.110684	3584.036954	3868.589969	3849.494175	3812.753039	3604.140006	3735.902498	4765.112365
RPL3	3412.692763	3922.066909	3629.167945	2874.641999	2424.327903	2490.48369	3744.176087	3333.634642	3202.324976	3597.784627	3484.280337	3450.907714	3174.621926	3266.050938	3933.939847
RPLP0	4076.305568	5204.219964	4635.0802	3780.458586	3202.504825	3351.445158	3732.792594	3360.492379	3199.450288	3559.292475	3537.12733	3453.832741	3468.955604	3521.603579	4593.880608
ENO1	2716.608125	3600.479715	3105.881794	3866.014876	3379.488943	3398.864665	3615.060916	3188.864893	3222.098169	2344.018026	2325.234502	2406.029611	3384.643481	3479.688144	4644.172453
RPS4X	2743.869925	2645.635291	2481.131652	3360.356358	2554.329224	2827.31075	3284.023202	2904.688752	2891.819802	3059.078318	2934.158604	2979.978386	2635.854584	2621.185969	3449.102516
RPL4	3888.098175	3675.409361	3634.131532	1657.503398	1271.924823	1359.440061	3278.522454	2995.824912	2812.416251	4706.924779	4453.669969	4544.282762	2935.254661	3047.107038	3414.896079
GAPDH	3804.374157	4823.596006	4277.371035	2623.897939	2500.918433	2468.089543	3075.796955	2782.191272	2600.349725	3066.835571	3101.186788	3115.036627	2968.347095	3148.036948	3606.523973
RPSA	4359.949456	5948.896899	4843.550851	3654.729968	2794.424562	2975.517839	3048.369612	2620.389787	2680.413676	3335.104181	3272.137946	3266.241017	3079.807881	3045.926111	4351.441986
RPL13A	3862.936543	4727.94204	4132.103391	2689.132507	2230.708914	2397.486327	3002.606441	2715.005989	2673.654274	3364.037632	3195.526781	3287.535212	2907.831769	2999.94868	3883.009376
RACK1	3324.647244	3822.005316	3535.025247	2058.349892	1919.944594	1838.149752	2813.250817	2552.140021	2384.631567	2820.699029	2858.03781	2841.09811	2472.201843	2553.164563	2914.931281
TUBA1B	2818.561604	3454.483027	3121.797121	3004.351813	2668.329124	2699.884475	2738.806591	2415.179895	2359.175426	2700.958657	2760.386299	2742.681095	2437.960623	2472.636745	3107.576187
MT-ND2	1537.605934	1831.919671	1933.813467	2866.377555	2491.412792	2405.640501	2633.483303	2528.393851	2187.016176	2246.184357	2310.820588	2149.660755	3082.542128	3067.537079	3008.929133
EEF1G	3762.268205	4654.01979	4139.843691	3837.771454	3349.526308	3275.629238	2624.847128	2392.382754	2273.693465	2685.206286	2642.279494	2635.720272	2853.95021	2899.406508	3525.463498
MT-ND1	855.7378194	907.5472027	1033.625614	2860.04288	2641.360375	2565.939634	2592.26589	2415.272014	2129.872036	2475.850522	2593.463357	2470.711706	2551.293966	2628.192803	2765.891798
TUBB	3479.251944	4056.626653	3920.199592	1670.969827	1528.031711	1490.622824	2509.601865	2305.834926	2168.680327	3211.466064	3235.397781	3325.560562	1827.562838	1872.438772	2003.451468
RPS3A	2584.29752	1975.845621	2328.170448	2995.630098	2087.228283	2242.517241	2504.941509	2211.791907	2395.85839	2256.000407	1958.130092	2046.075803	1994.311712	1924.59639	3091.431707
XIST	2315.758688	280.1385547	973.5248494	3387.121409	12436.76708	12319.80373	2411.123188	6026.614012	6479.042221	6008.746277	7738.783908	6817.964657	6784.833569	5745.132002	1145.576375
RPLP1	2436.316428	3019.944477	2570.021222	2034.521445	1789.787442	1801.43608	2407.303224	2147.18595	2161.920925	2413.902789	2413.987273	2408.935138	1846.501521	1944.396602	2423.029143
RPS17	2765.010946	3276.451797	3004.992753	1994.835755	1567.420514	1682.069709	2284.804613	1961.142902	2067.729824	2519.438932	2333.396929	2465.822621	2276.164355	2229.538555	3128.23017
UBC	1680.498156	1849.168747	1778.742739	2863.189242	2675.993631	2730.494847	2269.746314	2091.750927	2041.805574	1753.984803	1773.184476	1650.339167	1505.68564	1458.641889	1797.893531
RPS18	2363.860621	2755.656424	2428.228088	1448.794732	1150.377288	1253.95289	2260.540201	1951.402878	1921.418294	2305.411537	2152.694539	2210.852318	1903.357781	1919.636495	2595.21884
EIF1	1082.959878	1221.039622	1103.984459	2472.285251	1835.757343	1938.50576	2147.087264	1981.904423	1946.902016	1123.62526	1098.659187	981.3660188	1719.962166	1715.218001	2135.766916
RPL15	3541.489625	3987.715112	3898.980258	1601.83377	1337.022877	1344.404559	2121.455305	1956.643412	1863.38067	3157.49617	2959.431613	3098.110472	1954.705336	2011.985001	2460.708112
RPL7A	3237.328707	4010.04991	3567.454015	1572.299921	1335.971023	1365.804294	2074.546145	1863.214518	1780.092406	2619.56191	2576.56439	2609.630983	1837.37396	1932.351145	2321.487514
RPS8	2297.624542	2564.178967	2312.990145	2112.509267	1687.445977	1743.481778	2021.372243	1892.856288	1893.91452	2134.09021	2058.807197	2028.486642	1900.422486	1931.918138	2446.738156
RPL13	2204.328603	2724.294468	2377.392685	1656.41266	1455.960256	1499.055434	1974.157486	1757.91254	1735.262808	2046.701628	2037.683488	2034.882701	1668.453772	1756.550452	2283.09009
RPS10	2366.745121	3063.369767	2653.80326	1359.91966	1115.848439	1190.073884	1891.193212	1627.887933	1658.272442	1989.981033	1938.888656	1886.081513	1510.309735	1546.118676	1993.214283
RPL9	1884.981853	2274.292778	2051.243661	2306.451008	1577.079257	1645.273699	1847.411075	1584.48362	1637.989575	1722.882261	1515.739274	1518.127952	1676.696723	1634.481946	2604.957895
RPL19	2341.404975	2536.461779	2358.696508	1606.658192	1391.290735	1462.500867	1792.709188	1614.780457	1525.79904	2028.540096	1965.52339	2019.204556	1810.312954	1867.360786	2244.812408
RPS11	2259.134919	3025.326866	2641.165967	1725.422862	1485.529031	1540.582058	1788.163431	1532.405814	1467.02332	1971.224657	1960.167021	1946.741891	1750.280143	1764.4233	2389.022277
RPL41	1936.597529	1862.391626	1782.382703	1714.012056	1408.081436	1536.405529	1759.781097	1615.763057	1680.760274	1741.668785	1629.69414	1721.826824	1707.215748	1691.914371	2199.549748
RPS19	2016.848192	2422.287306	2170.452474	1692.407039	1418.444142	1522.284886	1747.939208	1544.278899	1602.211361	1809.351738	1763.641086	1765.858228	1593.784696	1632.671191	1992.395245
RPL10	1776.459693	2208.475051	1992.425156	2061.160642	1656.864305	1704.898612	1732.277355	1561.556284	1549.534641	1619.758587	1576.16817	1579.202123	1697.283997	1673.964278	2158.318418
GNAS	2057.559147	2342.187175	2210.161169	1625.20075	1478.243971	1479.087651	1720.664664	1630.174525	1611.185049	1954.75428	1938.816986	1923.185674	1465.59675	1504.579956	1614.448041
CKB	1451.135541	1807.381059	1573.994778	1233.289924	1179.712318	1167.279984	1669.171546	1542.641232	1505.015821	971.3845701	967.2772618	948.098713	1250.073729	1311.380269	1543.839888
RPL18A	2101.581906	2741.204496	2411.972341	1636.108138	1410.691591	1405.182989	1667.796359	1476.6842	1448.182458	1602.84704	1589.86086	1599.248697	1627.68132	1679.554	2207.572494
RPL32	1943.261524	2062.769097	1930.090777	1713.340832	1436.10905	1571.488367	1659.41765	1493.511227	1464.187479	1640.162737	1584.429049	1581.815537	1664.111144	1643.142078	2248.564339
PHGDH	1341.846012	1815.306311	1498.630983	1346.936513	1191.633326	1151.727388	1641.01841	1438.280912	1431.827813	1361.085442	1354.218343	1342.119334	1321.405415	1371.450098	1785.280656
UBB	1695.199334	2051.410983	1795.370755	1802.068235	1616.19263	1731.389734	1559.00378	1429.355628	1441.966916	1486.341185	1472.284788	1409.238951	1238.29234	1255.876692	1522.166498
HSP90AB1	1705.05397	1364.753667	1496.521459	1172.795875	1043.049257	1059.684661	1556.329805	1543.214416	1510.143643	1317.078655	1216.27298	1304.834991	1367.686572	1415.38059	1269.270365
RPL23A	2057.276432	2176.51976	2148.778144	1441.495173	1401.926144	1343.449924	1531.385439	1401.515291	1326.357833	1855.490851	1882.49967	1800.646548	1452.287399	1431.756113	1743.370786
RPS3	2070.119769	2610.077614	2185.632777	1959.596083	1588.182157	1631.073503	1493.720592	1321.924682	1318.743794	1797.440126	1716.980322	1700.415627	1518.552686	1557.800407	1945.296533
RPL5	1786.798984	1691.045154	1797.645732	2045.386882	1661.539211	1730.554429	1491.275815	1446.592071	1456.84537	1595.567722	1501.820259	1485.250649	1897.929496	1871.612123	2268.920562
RPL29	1808.042994	2261.324185	2022.206678	1291.224933	1086.097342	1124.758949	1486.348061	1313.53164	1277.565828	1585.641379	1558.099855	1579.514516	1433.429135	1441.439716	1926.297392
ACTG1	5081.276502	6127.691412	5579.11307	1559.378862	1416.906098	1381.23756	1484.247081	1344.933902	1262.803916	2522.819771	2602.516375	2977.797486	1387.147979	1505.839611	1558.089244
RPL37A	1745.11872	2267.7661	1967.97949	1577.166294	1258.133852	1312.82205	1442.609471	1284.422111	1278.575854	1512.590847	1415.09989	1480.141603	1389.882226	1394.871821	1915.44074
RPS6	1515.190675	1337.799337	1363.745508	1226.661589	986.0933294	1026.511093	1374.996105	1281.515253	1272.748783	1502.701269	1398.540411	1422.265071	1312.800578	1324.724746	1691.402546
UBA1	1024.518655	1318.515972	1157.384382	1075.468416	978.3797358	969.6705327	1331.181116	1159.509072	1147.272527	1037.30284	1059.052233	1076.721895	939.8975014	977.8470693	1120.190968
PPIA	1776.661633	2011.657585	1756.82023	1423.41408	1076.630659	1154.989058	1328.889138	1238.198964	1253.130978	1523.840703	1429.20751	1473.39454	1152.24397	1141.562941	1459.86049
RPS16	1726.338368	2122.865386	1877.973114	1329.274935	1204.333485	1193.214236	1278.771208	1160.082256	1125.751213	1391.085057	1369.947962	1395.705827	1306.447475	1346.099528	1642.547611
PKM	1852.550408	2449.919732	2086.526492	842.8893515	786.7086241	750.8602283	1271.398677	1103.623691	1082.747431	1708.764796	1690.236198	1803.649576	1006.444255	1057.992661	1278.011566
RPL35	1213.493417	1745.038576	1493.46058	1383.266503	1145.42968	1202.283269	1261.199372	1093.470157	1075.988029	1186.639156	1162.482964	1150.081569	1138.371686	1149.08151	1681.94289
RPS5	1495.602567	1912.528375	1661.850267	1015.897299	914.8399832	937.8095885	1236.9808	1111.156959	1061.847671	1233.366496	1219.064327	1217.825192	1174.962348	1191.949167	1526.038171
RPL27	1335.060853	1733.934749	1551.410457	1490.620368	1143.520761	1233.666895	1231.823848	1063.050495	1088.341419	1271.380713	1155.014224	1191.226947	1257.914585	1252.097725	1742.293103
RPL36	1217.251911	1573.023756	1423.155921	1035.278888	934.8049448	944.3066754	1231.645838	1093.429215	1061.905164	1250.654877	1244.743968	1228.188757	1027.997763	1088.26258	1327.1459
BRD2	2863.216029	2648.983392	2808.935206	697.7791451	660.7588875	662.2382763	1208.17827	1188.291067	1146.612126	869.3638229	856.6041157	892.6792037	995.5474753	1033.390011	889.68668
PCBP2	1093.486971	1261.997489	1194.179452	1393.375974	1196.661187	1198.615879	1207.66372	1164.741827	1069.192888	1138.858152	1118.800643	1101.457872	1180.524129	1186.232692	1238.342477
YWHAE	1141.077997	893.3495604	1104.356728	1211.307343	1047.256672	1027.664611	1184.914688	1132.487569	1186.974302	1287.189333	1172.290401	1173.988789	918.4658278	899.7877827	1006.19612
SNRNP200	861.1497916	876.4395326	878.4721598	766.2859295	719.3510322	719.15839	1177.160161	1084.913347	1055.437893	1001.016542	1035.250339	1083.507957	976.528373	1007.763891	889.2476243
RPL31	1136.958437	1225.998201	1444.155617	970.7994467	826.2894878	848.710319	1162.415099	995.2101454	1032.323846	1194.065531	1052.828283	1099.342103	1098.926148	1067.203893	1423.977658
RPS7	1310.747366	1178.404314	1257.317932	1271.843344	899.1011358	988.1665864	1162.2623	1024.524382	1091.915356	1532.627354	1362.743269	1415.830011	1085.697216	1062.125906	1631.251903
MAZ	1561.273215	1897.440731	1697.958293	899.6497185	863.532899	860.2454923	1156.91435	1082.907205	1057.302556	1005.134136	1037.551315	1050.201651	995.2257992	1043.624713	1168.92616
XRCC6	750.4870757	800.2384553	760.6283335	1143.178122	906.4251539	935.343448	1154.393174	1058.137494	1047.862701	909.0324306	863.092112	861.3619159	831.1709626	824.3659001	1008.870369
MYBL2	759.3320154	921.4905589	831.2353575	1176.991024	1159.06482	1071.458493	1150.420411	1047.615485	1019.815067	740.7992994	771.8452338	722.1696367	870.0535672	872.6658218	1136.356204
EIF4G1	742.0460145	849.5699648	790.5753079	1128.243391	1047.061884	1027.10774	1148.243032	1077.011605	1061.692282	918.9587735	948.9826211	989.9070972	957.1071754	966.7463538	913.1961217
RPS14	1637.606256	1931.896502	1672.439252	722.4466217	587.1291311	618.4443942	1137.317934	1000.123146	979.5305852	1462.665019	1385.602139	1367.547568	964.9882411	974.3042878	1271.465643
ASNS	498.7439366	517.9384685	481.8290329	1120.489917	781.5802531	833.4222367	1132.368407	977.7935585	1016.049226	582.4017035	545.2391381	510.6769331	831.6510642	822.8968267	1147.501036
TRIM28	843.7426272	1063.085553	924.4680653	720.6007561	699.5216428	671.5061913	1131.205991	1021.04434	998.9153071	934.0688734	968.8238191	995.2501463	852.8036837	871.6029873	992.6253049
ACTB	1763.899071	2069.98489	1910.443245	1321.80757	1245.608223	1166.126467	1127.806223	1064.606278	1021.13587	1754.992878	1847.192899	1969.787982	985.2538385	1015.243097	1053.494403
IARS	578.7983146	216.863689	378.3907768	1060.9532	1004.013799	1022.374342	1124.826651	1182.723	1185.342722	811.4233914	780.2192756	750.3668959	1021.522824	1005.480765	810.8562093
RPL36A	1094.024534	1127.716611	1303.439582	1229.954781	1032.471116	1099.057787	1119.436682	1017.013632	1100.762791	1109.003021	1027.408162	1084.92055	1144.519721	1101.599971	1429.605555
MT-ND3	544.1455371	749.0421809	620.9447247	989.5937146	711.4036934	759.6906023	1110.921982	943.2551646	915.860126	994.693094	962.3358228	971.8499313	840.8614566	847.5514371	1342.313282
RPL12	1251.659938	1535.506804	1348.606568	1202.455578	974.5229391	1042.183019	1093.884941	965.0361337	980.1132923	1109.323973	1088.625425	1092.127037	1156.184503	1174.077802	1548.709416
PRRC2A	944.8334221	1099.660375	1079.786973	661.3652512	705.1704865	657.9424186	1092.013159	1030.993166	1005.985486	1036.126385	1106.542857	1073.445865	899.6477731	925.0989886	773.1373258
MT-RNR1	1889.505293	2188.513589	2045.121904	1036.411578	891.0369244	901.9709984	1082.425049	1008.475247	975.4904829	1371.600013	1365.987267	1381.743698	1210.990077	1218.756214	1537.653193
RPS15A	1283.155597	1490.009929	1418.312701	1286.497419	970.4320075	1053.881275	1082.140462	951.1004076	943.9753537	870.7979957	792.6641578	823.934442	1057.175398	1030.160962	1493.444266
MCM7	994.8739713	1305.081188	1158.294373	808.1954687	745.1019681	757.5426735	1078.03209	947.5949817	955.6784425	1086.015449	1071.198365	1069.701831	768.4441133	780.8684157	909.3643621
FASN	1224.640464	1439.598552	1378.718996	1019.672933	1089.213946	1015.015697	1074.555923	997.3391123	965.5456155	924.8778151	1015.673188	1033.977502	1037.244746	1071.652052	938.7411856
RPS15	1481.668758	1879.301654	1668.468383	953.8510445	880.6742179	872.2182066	1071.805549	969.1303008	930.0393314	1230.719471	1237.43441	1244.891441	915.4903235	956.1180092	1140.267792
RPS23	1752.671248	1634.508871	1729.644591	2043.960531	1558.886085	1656.570214	1070.965156	989.1098364	1035.315075	1096.309435	998.7742206	1035.381515	1296.75698	1240.72146	1744.488382
CCT7	869.6312406	1096.990371	915.574972	1128.4951	892.8289713	920.2283934	1065.731806	950.1333654	953.3087671	832.5628255	806.6993535	806.9174156	916.61619	917.6197831	1189.44204
RPL6	1334.455035	1047.404575	1285.817194	1122.957504	953.9533564	1009.964086	1062.179239	1021.740348	1059.322607	1302.997954	1269.38402	1290.833863	1167.000863	1104.32437	1394.241607
MIF	934.8172346	1169.021155	1007.089038	963.9194023	939.578023	956.6385712	1056.838165	946.3700069	934.2286068	878.8898034	886.8875928	939.0443898	770.7718423	832.7414293	1008.848815
ILF3	783.4839512	839.0170903	833.2207923	871.2066078	814.5243098	811.0420117	1034.178901	956.6430911	953.2310728	789.1075018	816.8839988	786.7542303	953.6491568	990.5223544	943.1716577
MCM2	777.6277126	1045.878858	917.5190436	869.1090332	809.3429566	798.0351094	1033.720506	890.0719336	898.5343025	912.7823824	945.9272275	897.3982471	734.1453938	772.9168393	887.8905427
RPL18	1601.014862	1937.872226	1730.430493	746.5687288	652.0713554	639.0883768	1030.664534	953.6543491	876.7799052	1253.991231	1235.510644	1239.197388	983.1629436	1019.218885	1232.150193
PRPF8	862.0787122	961.6253866	1027.54522	918.1922774	858.7800787	821.8214323	1029.212948	950.9521988	909.9942082	764.2916444	829.8222705	844.8647643	868.2843484	873.6499278	786.0695144
ATP1A1	1297.661702	1497.830076	1410.527315	844.9869261	684.9515217	703.8842295	1028.257957	914.8007031	911.4703994	894.8046723	889.119539	880.8620951	990.1996093	1009.102275	1056.72745
ATP5B	1157.919732	1546.186822	1311.793299	1059.862462	831.8214589	853.4039412	1025.469383	879.7546324	882.645823	1079.361123	1077.988129	1034.83551	1014.36553	1041.656501	1313.575085
ATF4	631.0601958	619.1443488	645.7626593	862.5646007	778.878158	821.105456	1023.521201	965.2408421	961.6220546	1072.670033	1024.763927	985.1100532	655.4955751	645.1405184	759.7261672
YBX1	1301.336996	1272.786849	1341.119825	1005.870893	824.4584833	874.4854648	1021.611219	967.246984	923.163388	1336.968105	1286.811079	1304.873992	1088.471673	1140.618199	1219.417576
TPI1	1411.959324	1814.03488	1535.733795	1210.468313	1061.476175	1091.14784	1011.679312	883.1527912	881.8688802	1241.344335	1189.151647	1191.733952	1105.681347	1137.036053	1423.618431
TMBIM6	747.9022531	638.3005707	716.8246788	1010.233848	884.6868448	855.9496346	1007.400953	1006.83758	975.2574	835.798078	810.8863744	799.7413496	765.5490279	758.1158853	700.9725202
ARF1	1245.157493	1541.694433	1420.123583	1026.091512	888.8163444	863.5469384	996.0556589	889.5806335	871.4966944	1054.545266	1072.179109	1059.366736	967.2801836	994.8917849	1154.277663
RPS27	1145.964928	1259.224922	1321.927289	993.2015428	849.7808863	890.077837	992.3884933	883.2346745	878.2560964	1065.059836	984.2516707	1016.583342	960.5249845	925.2564456	1259.651051
HNRNPC	993.4200086	820.2846786	966.6999174	1295.587888	1139.586049	1165.052502	984.0991711	992.3032868	1057.65218	885.3195001	838.8375677	879.8870862	1044.402041	1032.090991	1142.103843
EIF5A	1177.6286	1538.58409	1298.674952	990.926933	820.3359961	845.8452206	960.3416679	867.054526	883.7700592	774.2121051	789.7856752	800.3021748	951.3443472	970.5398856	1197.60728
RPL26	1030.328852	1055.541731	1286.698644	1115.385679	1021.028117	1030.456521	957.34185	863.746439	964.7096251	987.0461335	900.9224113	927.6644752	1038.410822	980.1514519	1285.09633
CCT3	1194.591902	1509.484857	1332.72309	796.0295364	628.5409994	662.2382763	941.2773726	830.4199185	804.9903941	1167.521754	1128.2701	1149.340562	841.4243899	863.0215832	1046.190111
PTMA	1749.867927	1823.544334	1814.651395	794.6451372	648.9937095	700.5827833	940.9045441	931.87338	910.2902234	1488.420937	1421.587886	1519.453574	783.4824733	821.2561252	848.1943117
RPS9	1262.281943	1760.083839	1411.602759	859.2923844	709.1441559	720.7096719	938.9089949	814.5345501	806.3111968	999.6930297	947.6246684	971.0699241	801.2952901	838.1433839	1168.527019
SLC25A6	1226.013651	1600.519292	1381.118063	560.1782556	527.5630478	513.5936466	921.7191561	808.7208328	779.7397544	1410.680393	1429.773323	1496.287751	703.7872071	758.9031701	909.4042763
USP11	284.1689304	349.0500963	329.2926294	958.0461936	943.0452443	847.6363545	912.131046	839.0586112	801.0668332	305.3269569	312.0273568	313.3678799	682.6772098	680.4502411	770.981961
SLC1A5	851.9817491	1170.987635	1005.664075	957.7944846	894.6599759	868.7178781	910.6794596	787.4721054	783.2359968	586.0218775	584.7118058	603.0625421	813.3983553	833.8920461	1015.176807
NUP210	750.7697907	931.1534319	927.2394013	859.2923844	845.456599	796.00651	909.1132743	820.020734	823.5593261	655.2489287	707.6819681	653.4510052	866.6759677	905.7317828	764.7154375
LDHB	1113.775809	736.1583502	1094.553644	957.8364361	896.1403625	964.937134	908.8076772	939.6932392	1038.655929	1238.292903	1076.36613	1084.365965	1132.983611	1086.374277	991.2283092
RPL39	1064.987283	1300.207371	1251.237538	1092.836333	740.8166384	793.7392518	903.2687291	780.8395546	776.7485248	921.5682988	848.1923531	856.36987	848.6218937	825.822377	1376.000835
TRIB3	58.15850764	69.63201896	60.55576052	600.997056	521.2519258	543.5055443	897.9207793	812.3236998	801.2222217	397.2375399	416.4388321	321.6749562	582.1534128	589.9124907	740.248056
MCM3	461.9562572	447.7131152	445.52329	655.7437514	650.0066056	645.0946222	875.344791	841.4741698	854.792425	618.1905816	595.7263111	592.6104461	602.0973341	603.9655241	572.6085739
RPL23	1059.97919	1129.115185	1258.682918	900.6985057	770.4243711	812.4341878	875.230192	786.6942136	826.2397786	1084.361059	974.7082808	985.6170578	920.9186085	873.8073847	1141.744616
SHMT2	809.5341161	1114.663257	936.5461268	700.8835554	627.4112306	606.3921269	867.0172691	773.2653454	716.0692952	832.7098824	832.6890596	790.4982647	738.2869742	768.1931306	896.8313151
YARS	438.1678121	541.1632685	475.1807219	943.3212203	758.6591931	761.2418843	864.037697	801.474157	796.6771066	447.8618891	454.1974617	402.6006999	780.1852928	773.4285744	936.7055634
RPL24	1039.542936	978.9592246	1055.879029	988.2093154	802.9539195	836.7773811	857.8111554	840.0412113	875.4979496	886.1650775	825.1071569	849.505807	843.5957039	815.9025887	1064.071656
SEC61A1	453.1113175	551.7161429	516.668036	1335.399853	1121.821409	1111.195176	852.4632056	774.2070039	725.2760669	675.800135	695.3095101	686.2113063	894.8226308	888.9232526	1008.910283
U2AF2	463.4909956	553.9623371	512.9039825	682.4248995	644.3577618	641.7136231	838.4821367	740.4710667	760.0831025	686.204413	681.8054248	711.9905432	599.4837154	602.8633254	672.2343232
MT-ND4L	969.5911757	1067.408417	1229.480482	683.3478323	665.4337926	583.8786508	832.1791958	745.302184	686.3123874	714.9908076	783.6141574	745.8818547	778.6975406	776.8532633	660.7789586
CDK16	656.9084214	797.1446407	740.9394386	594.410672	576.1820615	561.8027157	826.8694456	753.8180516	694.4314393	765.2475144	798.5139163	785.3502174	648.4589093	684.6228505	705.7622197
TSC22D3	1226.781021	1358.184608	1320.603665	481.561162	384.66678	390.4457277	821.3304975	753.1629848	666.8111242	472.8615677	442.3908173	459.6582243	1758.925189	1838.742984	1881.912843
RPL10A	769.7116935	772.3941239	751.3629712	780.9689512	648.2145586	692.1103974	820.0699093	782.3543965	780.2836143	873.7020024	808.2459107	805.1623994	763.1766663	768.1931306	865.5386118
TPT1	706.5450921	571.7199853	716.866042	1061.49857	946.9409986	988.5245745	819.6497133	823.9101928	881.8688802	872.4887827	785.5379237	797.6743306	841.6254375	820.075198	893.2789547
TAGLN2	870.1158949	1048.803149	947.3832916	963.8774508	836.1847038	843.1813911	804.4844555	718.0350309	714.321174	736.167006	751.8154313	715.2275729	779.7429881	780.6715945	1002.005133
P4HB	793.2174237	1082.919871	936.7529429	1288.791746	1129.145427	1108.4506	798.0669157	706.9807796	678.2710299	1087.743368	1097.94249	1114.864246	839.3334949	849.5983776	1061.756634
ATF3	148.8292366	167.7017036	162.764288	743.590173	565.5076947	620.8707582	796.4625307	725.6092401	770.066817	179.3359296	172.3845528	127.2971699	388.4239514	388.7218634	531.4969866
SARS	589.0164413	667.6282378	631.3682572	1034.439858	857.7282251	889.4016372	791.8785737	726.5099568	722.8286972	629.9919004	613.8323473	573.2662683	904.3120772	906.8339815	1039.045476
SNRPB	631.0505027	863.5917259	714.8735755	873.8378053	705.4353978	744.5278159	780.0599866	699.5179318	692.3581675	702.2961179	687.6061461	651.5668979	688.4496883	701.0983592	905.6711047
NONO	785.9072224	782.0146159	796.7384284	664.0501466	621.5675992	593.2658953	770.94517	781.044263	751.6144265	1112.191583	1124.573451	1096.144074	714.4427296	719.8144805	627.8098605
EIF4A1	1265.214505	1467.473397	1333.47466	737.3561815	619.2126157	653.0928727	769.5978687	710.3351308	715.9558615	1382.023776	1365.921255	1366.877932	749.0989117	766.9319004	855.4263587
HMGA1	1270.601841	1510.629144	1416.028624	651.5905539	640.7347103	607.346762	767.3926034	697.6051369	655.4677598	819.2174088	849.2108176	825.1695833	799.3250237	816.9654231	919.9815293
PLS3	1135.94874	662.161086	1224.889164	1013.841676	1089.759351	1148.306613	766.1320152	910.3790026	1033.48926	1051.898241	1038.19257	1116.034256	782.5174449	740.9137127	576.2008485
PARP1	870.4793855	569.9399824	702.9679986	747.3658072	740.1933177	754.4401097	761.0514628	789.1097722	746.991617	863.5550741	816.6953943	898.6852589	831.6936863	861.1714639	682.7716621
FHL1	415.8333296	290.5642861	359.6532361	759.573691	682.964687	718.6810725	759.9054736	790.9112058	794.3462783	302.826989	297.5802487	307.400825	536.7568661	511.8532041	450.1519236
PTBP1	788.9766991	937.6801093	893.5283734	678.6073139	597.0633046	595.5729299	755.1305183	703.7054459	665.9564871	630.7271851	638.8790307	676.2272145	666.9552879	698.5577912	700.0544944
NPM1	893.3078114	568.6257469	866.1037284	945.7942607	938.7170613	1008.01146	753.8687842	860.9996622	970.5242648	919.913173	875.2748339	928.947587	1012.436277	982.214138	932.9512372
HMGN2	400.1628429	492.461541	412.6808898	864.4524178	617.4836799	676.319143	752.9569587	716.1107723	715.6959742	649.4401798	651.0628842	627.749769	544.6733162	549.839695	691.4729495
RPL28	1100.043939	1183.956227	1114.283902	540.125443	555.339776	528.5495955	752.8767395	733.0196826	672.8324305	834.2539802	849.1353758	889.1691715	715.6892247	782.6398064	769.505137
HDLBP	591.3589367	434.1511882	502.48045	714.8114504	700.8072417	677.2340015	752.074547	716.1107723	670.5404494	862.7094967	842.006124	879.2630804	850.350903	880.0662988	699.5356103
YBX3	735.5031824	749.381229	708.5520339	642.4031774	551.2881915	551.8586008	749.0567753	728.3113904	701.2685356	717.8951821	730.7671643	688.8633307	709.0948636	734.4579775	749.1489142
FTH1	787.6842879	957.3449034	819.5709282	1769.765587	1478.321886	1539.985411	746.2300018	692.9787281	656.5166326	789.8060222	791.9127573	779.4221629	790.358301	808.5021117	1022.481098
SLC7A1	179.1605138	184.8236365	181.0881964	729.1588602	693.872799	658.7777243	741.0730502	717.7484392	702.3951026	301.1358343	315.1581922	281.8165899	550.7095691	559.9563045	442.3287478
PSAP	1439.786555	1822.002512	1661.064365	628.9787004	536.3674525	530.1804303	737.8642803	669.3553837	656.2835497	766.3504414	752.9470586	737.6917794	640.9397293	662.6969692	741.3257384
NME2	983.3032555	1323.846233	1091.727709	789.8395939	639.2893855	683.6014172	737.8478544	655.0585521	636.1789904	737.3055943	710.6336293	704.6030953	782.598266	798.7468659	1076.463806
PRRC2B	460.3407431	524.677051	506.2031402	611.2751713	644.9810825	607.346762	734.0825157	721.3922479	723.3725571	683.4103313	720.4693562	719.6346134	719.3080814	726.1914872	552.8111493
SLC7A5	245.1946527	295.0142934	283.2553607	757.6439224	751.9974533	706.4696994	731.179343	695.72182	669.8412009	448.633938	473.7746133	432.0459705	605.6357718	609.3190607	604.7793888
SLC3A2	412.2388108	510.9879809	446.267828	1129.376082	963.4979544	995.0081375	729.3075605	654.9439154	661.0617477	459.8470291	465.3628506	396.9846483	482.5142253	476.0711105	595.0802473
RPL38	893.1773587	1107.416102	964.4663033	878.1705552	723.5194893	740.7172311	727.2829795	653.4700153	592.7684791	717.0496047	701.0053673	695.649393	686.8992092	704.0294205	928.4433317
H3F3B	378.9172169	257.464708	316.3037497	937.4467531	806.50451	853.7217551	721.6622842	737.5637987	771.8903017	616.9030981	563.4368361	553.7239687	626.1852484	637.3054603	558.4785612
FKBP4	730.9393551	979.1711297	815.0209735	940.7621794	735.1288371	781.2494434	718.4588623	631.3615128	643.4251471	604.9186934	605.4960265	609.6926031	644.3173288	654.8241213	939.4995547
ALDOA	1207.31246	1439.652799	1321.464434	620.3895521	611.1717788	579.8667971	711.3579308	671.2374724	616.435321	723.2050403	725.5737496	744.3347104	740.3215759	794.8446888	890.2985641
OAZ1	735.9878366	944.927264	828.2158421	653.6042254	565.8259779	580.9351928	708.6415543	656.499699	652.8261545	683.3368028	675.0156612	693.582374	595.7442302	611.1691799	744.7583563
RPS12	834.211094	765.9945896	812.4564536	821.4101883	750.5949817	770.9473404	695.9974729	688.6389109	744.6996359	729.6965009	681.5036575	688.8633307	674.3538394	654.2336577	708.3566402
MARS	336.4308116	436.2278583	375.1230821	605.3600111	553.9373045	557.069317	686.2947639	637.1342884	634.6456939	376.5025124	376.8318779	357.9842899	691.5635134	700.4472747	812.6922608
EEF1A2	639.7839719	797.9074991	711.8610919	663.5886802	666.0960709	625.4052746	680.4502187	611.0544438	578.7835094	603.0437175	609.1926755	585.0443766	554.730521	568.5770729	673.8308897
EIF3C	835.0382372	900.2814003	916.4498042	322.4282503	327.6056667	316.4734457	667.8065193	618.9746101	578.5589729	553.920452	582.13245	536.1983777	441.6726129	487.944546	493.0484722
BAG6	739.6631312	931.6196231	847.0774724	484.8753297	463.5558046	442.7517721	667.2713423	602.7842262	578.395038	516.7212979	533.1473236	530.3268737	509.5752314	516.5769128	589.7716637
HSP90AA1	508.1599605	356.4667751	554.3085702	942.440239	1118.977509	1130.088994	665.5905581	823.3370094	927.2811846	711.8658478	700.8922046	727.3956848	711.7084823	657.894532	638.8660835
RPL27A	953.2744832	1117.757071	1001.858658	1073.286939	832.8733126	884.3500268	662.4963871	583.1731657	581.2697262	774.3282801	729.8995834	727.1226823	757.185448	762.9183225	1028.987107
RANGAP1	354.6861209	443.6445371	397.3351336	655.9535089	587.8693244	611.0459727	661.3121982	586.7760328	593.6619633	377.2745613	379.3591788	383.1395211	448.0948772	477.0552165	583.4253119
HUWE1	484.6946182	190.4603124	283.9171723	513.7379553	676.9652254	617.6090886	660.2808079	710.7064717	678.8537369	578.5219739	610.3243028	642.2579024	760.4022095	794.7246279	357.1519252
EIF3L	649.4261678	637.2855452	643.1948303	425.8168601	342.3479801	349.5515495	656.8248863	589.5563817	543.4159095	816.2751672	797.3668235	804.6191244	503.3138052	503.296993	583.2772304
RPL17	757.8287795	623.3748224	804.9721918	613.4188924	557.9125321	574.2630894	648.3839114	584.3584271	625.9392733	848.5048999	780.312069	801.6788874	691.1935858	676.8531369	822.7163035
HNRNPA1	1286.77556	702.7112477	886.5379885	577.1270773	634.2155551	659.7156532	637.9638131	755.3455853	740.0620645	1084.017681	1075.140955	1189.974646	676.3594902	694.5890886	487.986159
CSNK1E	424.7586412	387.8342408	409.2262333	588.4883801	647.5698113	642.391414	633.1502763	650.7146408	643.764671	550.2598373	545.2508316	530.2137727	491.8416274	502.2995032	428.8864562
LONP1	456.3019579	578.0771386	505.3345125	560.555819	559.6251057	551.4210597	633.0062636	575.1485981	569.8875148	605.2863357	625.7521544	589.2954156	552.1973213	579.7565169	641.1811049
GARS	249.3546015	203.0050948	214.0546863	463.0605546	383.9655442	383.2461885	632.3950694	610.4812604	598.4790084	393.7081735	376.8318779	354.3572565	490.395291	473.3943422	500.2441974
H2AFZ	548.1035467	507.0889269	593.2727275	721.7334463	620.0872125	643.9411048	628.6897041	604.5447181	672.3662649	697.0866261	635.7859162	628.8807794	472.1401694	455.2474279	511.5399054
RPS24	1018.379702	924.7962786	1149.235827	633.3836069	573.1044156	566.6156673	627.8875116	558.5672213	687.322413	726.240663	674.6007312	684.7292927	669.5689066	609.0041467	807.583248
CHCHD2	642.2476309	820.5813458	703.6711735	680.6209854	556.3916297	579.7816755	627.3909163	563.3573968	564.0604441	619.4405655	614.2849982	595.6914744	582.8369746	595.069206	783.1557806
GANAB	547.6996681	683.6906451	625.618769	1018.246583	917.6838838	899.1866462	626.7415224	550.747362	547.3950219	608.2642386	619.4150418	598.9675045	662.5724504	673.0891284	726.6772408
AP2M1	485.9870295	659.0672714	553.2331263	529.5536674	437.7659111	452.2981224	625.1753371	566.9193222	542.8499067	500.7656207	514.2491483	500.647601	467.2346082	482.1332034	620.5853971
AHCY	694.1415787	913.2644026	776.0100757	616.3001208	535.1562625	532.5622447	624.866684	542.965988	540.4367225	637.0458539	637.4041431	622.9839252	557.7800109	566.1703434	732.5398329
KPNB1	624.2750365	188.6803094	376.4467052	674.6638737	823.0170542	798.432874	624.7933407	715.9470057	717.3512507	745.2477716	673.9217549	710.3915285	784.2866637	777.8767335	657.9849673
C1orf43	470.8415848	565.447594	489.4510343	752.1902286	526.1995338	571.5877248	624.2585457	561.96538	566.6632023	442.4575468	417.4195757	400.8066834	624.7755027	613.9246767	805.1085699
EIF4H	539.7028733	580.6199999	600.9662873	572.8895573	523.5504209	525.4072552	624.0675475	591.1977333	583.9501788	791.9383478	745.9686905	728.9556991	525.6188294	541.1008339	529.1819652
PHB2	669.9536977	883.7714494	767.0809965	591.2223587	482.02168	511.8832589	621.3171733	547.635795	529.991504	611.6465481	595.4245439	585.1613776	599.0816202	626.7574187	798.5227331
XBP1	155.9778865	148.2064335	147.087626	710.9099617	571.7019441	591.4361781	620.0183854	577.15474	572.762203	255.3275997	255.1065055	237.3561813	382.7946187	386.8323799	466.1974169
SRRM2	806.0607608	525.9484816	635.5459429	534.5458947	763.7626313	677.4328838	617.8028062	665.8753417	647.1156252	547.162083	600.8563547	635.0818364	657.8277271	671.2783734	342.2639426
USP22	451.051537	523.2360962	499.1300288	645.1300243	564.7675014	559.6150104	617.5354087	588.8231163	576.7246111	587.676268	635.8236371	625.8387515	568.522386	597.0767822	507.9476308
RPL37	1031.38459	950.3520348	1046.90321	861.0123955	844.4047453	869.6725132	615.3198295	573.2243396	623.5742595	737.6375753	691.1224892	714.4475658	791.363539	780.6322302	894.1171521
EEF1B2	453.1920932	528.3641999	475.0566322	700.1284286	518.0963649	558.541046	613.6772449	529.948993	546.4626906	569.9926718	531.5253245	538.0099443	547.8949028	550.9418937	772.7381842
IRAK1	459.4522104	616.7286305	512.986709	749.5892362	706.5729581	690.4397861	611.0796693	536.5815438	557.3787363	512.8978176	542.049458	516.8717501	574.2321376	589.8731264	747.5124335
RPL14	1129.729011	848.2561531	876.858994	511.0950114	522.1089918	535.7093582	607.7945001	644.7494393	584.3386501	935.2453288	908.2440397	919.6284514	791.0016533	814.7216615	805.1085699
DYNC1H1	349.2337608	84.12632845	163.8397318	445.2731225	597.881413	560.4503161	606.6867105	628.1271208	591.331135	438.1561315	453.4807644	469.5643153	519.5069826	554.9964104	241.0416268
HLA-C	604.1845032	801.9815867	703.1334515	489.4681789	449.7278247	450.6780272	604.9650526	545.7352826	528.4162526	523.609077	519.4836788	505.7433878	382.7226437	398.0574864	462.8765586
BSG	932.9997813	1237.483458	1059.767172	551.326491	510.1879836	498.2797097	603.5543398	535.1076436	512.7045276	728.3362243	733.9734415	742.8398267	572.3020807	596.5650471	724.8411893
RBBP7	434.6944568	222.585127	333.6771312	575.8261616	542.6006594	550.5459776	599.7725753	617.8917029	621.5930555	394.9581575	371.7395553	419.0198508	517.8583923	519.6473235	506.2313218
KDM5C	414.3389791	487.932705	457.8081676	514.1574703	519.6546666	510.769518	597.6333954	563.1117468	561.3022973	648.4107813	662.6432032	649.2779669	480.8254255	492.3679056	442.129177
PABPC1	1058.967878	634.7392934	829.9923926	565.5052559	532.1982163	537.2594468	587.8527591	634.6360277	560.9515076	867.7072266	863.3919932	895.9127234	789.4728874	812.5948116	585.9387067
RPS20	816.0769482	821.6832524	783.1299275	637.9982709	492.2675138	522.7820088	586.8610964	539.4474608	557.6506663	626.9772333	579.5063204	612.9296328	584.9278696	569.0100796	843.0669383
MRFAP1	451.0111492	381.344435	387.9043184	615.0927569	496.6307586	514.1902935	585.7533068	599.4270092	604.8887861	618.3376385	576.8658568	595.0284683	488.5858626	490.6358791	486.4338972
HSPA8	352.5455647	236.189435	304.143789	494.6080756	451.2062635	459.8158732	575.3630042	540.4710026	541.0240912	798.0044462	750.4197577	925.9075091	418.9027666	426.0391623	529.3416218
SAE1	423.1031431	507.0465459	467.1976196	564.0377927	439.2073402	467.5722829	574.7900096	510.4198158	520.2408724	414.0387945	398.3327959	411.1807788	510.0979552	507.9167801	630.643766
PYCR1	340.429209	459.1983722	392.3301834	568.7363597	502.5133476	509.8944359	567.3028798	491.5457054	489.745869	171.6889691	168.6879037	167.5065394	484.4844917	506.7358529	631.4021351
ILF2	478.5960525	525.6518145	475.015269	528.3370741	402.5482922	441.0811608	566.6152863	525.6091759	544.5203337	536.7945692	513.9096601	512.074706	490.47571	487.5261042	611.0059981
SLC25A5	833.0802341	1027.231209	896.7960682	503.879355	383.0695207	393.9858326	564.2087088	509.6009824	495.1067741	628.3742742	611.493651	636.4468489	487.5806247	504.7282767	605.2982729
GCN1	557.2715892	714.9678393	663.4247561	508.0325526	498.3838481	473.8569635	564.0559103	498.8742645	504.2746987	483.2290814	510.8542665	523.3068092	561.6063487	585.1494177	550.6557846
KHSRP	311.0672402	383.7177722	366.9745269	589.712105	551.2881915	524.0150791	562.4515253	522.0472505	504.080463	448.1927672	473.1710788	448.1141182	519.4265635	537.6367808	499.4858284
VIM	788.9766991	700.89734	756.5747375	273.481768	259.340364	265.5476444	559.9685486	570.1127726	545.5692064	953.4068601	918.0891969	983.8230413	409.0514345	423.7166722	399.7802507
RPN1	541.9645931	633.8929444	615.9811377	784.367022	647.7470681	660.5676649	558.9753579	501.1260565	474.6731795	701.0571632	695.1586265	701.2264443	544.3162556	557.397629	642.7776714
FBL	578.959866	682.8854057	603.6135336	544.740107	485.8784768	492.6314524	556.3395826	505.0973986	501.0503862	479.699715	459.8933189	451.7411515	533.3792665	550.4695228	681.9733789
EIF3D	432.8770034	565.0661648	522.3761609	488.8607214	400.5225	411.5670277	555.9575862	486.7555298	487.4150408	622.2714115	620.0940181	590.2314242	403.743778	400.1374928	504.794412
VARS	415.0659604	512.8103648	465.9980861	326.6343067	303.0896848	296.0959654	547.01887	484.2580879	489.1243148	251.1732413	268.0447772	261.692405	396.4256456	408.6008043	485.8351848
SLC25A3	753.1930618	853.93521	754.7961188	487.2665647	369.4343806	386.7067404	546.1402783	506.9397738	497.3599081	621.719948	616.5105318	619.5986941	544.034789	559.5626621	636.7506329
MDH2	684.8972032	815.7075283	729.1509197	582.2027882	526.5891092	534.5558409	544.039298	504.0738568	470.9438542	550.1399859	553.8561025	543.8209977	621.4783222	640.6529952	763.5579268
FUS	94.62873847	91.28872115	87.19367703	567.6875724	572.9096279	577.8326289	542.4731127	544.524228	561.496533	246.2100699	243.0735357	243.9472419	344.9976711	343.9647233	358.1896934
CDK4	379.1611595	505.7327342	438.3674522	570.4563708	468.9709031	485.9490072	540.1047349	466.9807026	487.6481236	393.3405312	385.9980587	363.873344	440.4550687	446.7447522	581.2699471
DNMT1	328.9590588	254.8370846	291.983001	550.5713642	581.4023723	562.7573507	539.6463392	554.3092874	538.7321101	445.7663278	443.2583982	429.5109472	507.4039174	502.4057866	401.9755296
HSPA9	386.5521365	126.9311606	228.945447	916.5561692	1078.500621	1099.58045	539.340742	660.8804578	700.7246756	468.7439735	426.6611983	422.4518823	722.1227477	684.4653935	515.6510641
KIAA0100	440.3487561	574.3476086	525.6438556	447.4965515	392.0297556	384.1212706	537.2779614	494.1659723	473.0415997	438.0458388	451.3683935	465.3912769	542.3057797	555.7836952	568.0184452
PGAM1	571.901281	767.7610306	635.1306561	423.4470204	333.3869661	354.1735741	536.4849368	465.7172426	477.7339455	575.3514265	566.745337	577.7314194	406.83589	417.8380167	528.2064631
JUN	542.9339015	432.6678525	504.7140641	506.4803475	512.0969032	562.7175743	534.0691915	565.8548387	589.6218609	268.5259594	259.0294801	273.665515	543.5522748	583.063113	474.6991335
RPL7	793.4193629	718.8668933	995.9850803	556.6543304	468.6202852	476.9595273	534.0691915	469.5190862	570.509069	754.8432364	704.2116445	695.103388	621.4783222	591.0146894	757.4111458
ODC1	368.9834207	443.8564422	388.6902197	567.5617179	367.8760789	439.6492082	531.8536122	485.240688	494.795997	399.7007436	401.9540031	378.7324806	520.8338967	536.6133106	662.8944092
FKBP8	654.3639867	828.5489779	697.3426001	533.622962	511.1229647	501.42205	531.3570169	491.9960638	481.8599	528.3020314	527.2251409	516.4817465	549.8651692	582.5120137	713.6652238
ARHGDIA	760.9071416	904.199102	847.9874634	603.1785336	613.8150481	593.1465659	530.8222219	494.2887973	472.9639054	755.725578	791.2715018	820.567541	467.2346082	496.0681441	524.0729524
CNBP	490.8335718	255.8118481	422.7735166	684.941989	708.9493682	722.3405067	529.8672309	598.2397007	664.6745316	352.7160535	332.1326011	335.0130788	610.300076	576.0956427	562.7098616
KIF1A	451.2130884	519.3370422	511.4149065	456.348316	466.16596	418.5676846	528.4156445	493.2652556	489.3185505	459.9573218	485.2040486	481.069421	466.5912559	477.960594	433.3480612
CALM3	745.3578184	950.606321	842.8584236	503.3759371	443.570585	434.2396097	524.7866785	467.0625859	464.3786879	740.2478359	757.7753349	762.6520088	464.741618	478.2361437	547.3029949
NCL	532.1503449	144.0530934	313.5332409	547.2152449	847.9888393	846.1646255	523.1058943	738.0964498	782.8086783	637.6020967	621.1502036	679.7762471	753.8078485	748.6291037	380.0227403
RPL35A	752.9911225	744.2107444	701.3961961	629.9855361	419.1442055	470.9930584	522.9148961	470.174153	481.3548872	652.1607331	564.4556778	595.7694751	526.1013436	519.0174956	788.2248792
SBF1	385.6232159	457.2488452	417.1894813	474.8908749	530.9133965	472.6238932	521.0813133	479.0584956	467.2922233	684.4397298	725.4862371	701.4214461	414.6807671	433.0066327	413.0716667
EEF1D	615.6724239	787.5241487	685.8022605	496.6636986	459.2704749	467.5722829	520.4319194	458.9151934	461.8147768	564.3677441	561.8529351	556.2231117	423.2856041	436.2738645	542.7128662
RPL11	839.4615148	836.6013721	852.9510503	482.0226284	413.0278713	450.9457227	519.935324	493.0196055	478.0140334	830.0628576	764.9800285	752.7849181	668.4028306	662.657605	755.5750944
FKBP10	414.3389791	533.7465897	462.7717546	482.9875127	442.4408163	451.3434873	518.4837376	458.9151934	456.5704132	288.5992308	304.5586169	289.1876576	511.9878026	528.6617343	605.9768137
RAN	1088.816116	1224.091055	1078.546076	558.5840989	457.5173854	495.4555811	518.1017412	511.1158242	532.0892495	868.2241317	813.3005125	842.758745	602.0973341	602.1154049	686.4836792
SMC1A	426.2937834	107.5206525	227.456371	440.6584585	668.5114385	625.9621451	514.9693706	654.9029738	664.7133787	818.5188884	819.5999043	826.3005937	538.8477611	534.6057344	241.0017126
UBA52	829.8895938	926.9577107	843.6029616	427.2339815	387.5885957	396.8497377	513.0975881	461.4126353	437.379927	662.3811899	648.2715369	650.4479776	537.9229422	557.6731786	680.775954
ATP6V1G2-DDX39B	305.033295	319.3346428	316.2053052	397.4903746	373.8003525	368.4262751	510.7418162	499.9256466	492.2002312	387.1078907	398.1215588	359.9924183	397.1433855	405.6150267	399.3619502
TRAP1	536.7545601	700.2616247	620.5724556	538.2795774	485.9953494	472.9421049	507.8642372	447.8609421	438.7395768	219.4457081	220.1015023	217.3489974	555.4945019	572.7890466	681.8137222
ATP5A1	490.9951232	544.12994	497.144594	437.2184363	335.5802757	364.5910289	507.7878379	460.3481519	460.0666556	498.449474	467.4375006	499.1655873	473.3062455	482.0544749	553.0107201
RPS27A	644.0650843	626.3203034	743.7521379	582.4125457	469.0414162	494.4607718	504.9228648	465.4249191	546.4261742	613.8156378	554.0684712	565.2711948	554.1201405	526.7395785	646.7623022
TKT	662.3203936	887.2890743	769.6041531	422.7032205	381.1995586	390.6843864	495.2201558	421.4535641	404.9814139	373.1937314	380.113597	407.0467408	444.5966491	466.6236931	578.1566425
AP2B1	631.4236864	440.4235795	499.4609346	439.9033317	391.990798	387.3829403	493.4629723	471.4842864	452.6468522	546.8679691	560.1554942	551.465068	523.4475154	520.1984228	440.2931255
NPLOC4	250.8489521	323.2400539	288.0948579	699.2054958	629.3980653	619.3194763	492.6225802	443.6848916	433.2621304	342.863239	358.4240745	353.4602483	424.5723087	436.8249639	512.6575019
BEX3	390.5909218	377.3606189	353.366026	497.5446799	429.7796148	454.3664983	492.431582	506.0799987	533.4100522	387.4950181	369.8157889	365.5893598	402.5374925	403.0504465	429.59613
DDB1	491.8836559	697.4220962	594.2240817	723.9568753	616.1914582	628.0702974	490.9417959	417.113747	408.671892	475.0306574	490.3340922	497.6445734	473.0247789	475.2050972	591.4480585
SMG5	258.3610926	298.9981094	275.0654422	457.5649093	421.9491486	413.8342859	490.7507977	431.4842736	440.8373223	380.546578	396.9748432	379.0444834	506.6399366	519.6473235	592.1665135
PRC1	416.4795353	198.8725214	296.3108352	325.4974213	344.3745515	357.031115	489.5016694	518.2540046	521.5189432	545.1165211	482.646571	480.6954076	496.1725946	497.458489	377.0411523
MTHFD1	173.8697051	161.3445503	163.136557	439.2740593	367.525461	372.1883327	484.3332579	459.1608434	451.8699095	207.8649746	204.522767	205.5708892	379.5376477	386.8323799	373.9557876
MT-ATP8	465.8738789	552.9451926	558.1967133	460.6693196	447.7542356	399.2013219	483.1872686	459.4064934	496.9325896	584.5880724	571.1609465	554.7945286	511.0629836	524.6465818	518.6047121
CCT4	381.503655	258.0580423	290.5352882	480.5123747	364.6426028	393.1903034	482.9962704	473.5723117	462.1644011	414.5534938	391.4298696	402.9517031	448.778439	463.6713751	444.0849709
EIF4EBP1	270.5582241	317.1371868	281.7249214	479.169927	442.5187314	461.4069316	478.3359141	459.6930851	425.6092442	322.2752684	338.1679465	301.0437666	404.1056637	410.529652	504.4351845
LRRC75A-AS1	627.9503311	680.6392115	658.9988911	546.4601181	410.2618857	433.483857	478.2595149	452.5282926	453.8511135	583.5586739	560.230936	569.1712307	577.5695277	583.889762	672.2343232
FLNC	273.3045981	350.44867	329.3753559	843.7283813	906.8926444	789.9604881	476.7697288	436.9295159	432.8348118	493.8171806	556.534287	468.3163038	430.2016414	437.8877984	451.8682326
C1QBP	442.287373	542.180413	470.0103188	616.2673987	461.9585453	495.2169223	474.9743457	434.1864239	432.1355634	387.7156035	385.055036	374.8714451	480.6243779	495.0840381	621.543337
HSPA5	1030.778772	334.3438817	582.3528363	1035.992063	1086.097342	1069.509446	474.8597467	526.6736593	513.1318461	1463.731181	1376.850889	1421.173061	520.7534776	516.4194558	392.3562165
H1F0	113.5302535	93.95872553	105.0212267	628.8108944	561.8846432	591.6748369	474.3631514	482.2110043	517.871197	125.8807345	120.5937451	103.9749555	314.5590654	312.3552391	300.1545013
CSNK1D	289.7020662	352.8643882	329.1685398	453.2019542	406.9894521	423.3010833	470.5431872	435.5374991	430.1543593	365.0320716	368.1560689	388.8335734	406.1161396	421.551639	435.1441986
YWHAQ	332.2708628	274.2052116	282.6349123	528.3790256	410.7293762	435.9499975	470.352189	465.6296275	457.7358273	449.5530438	422.9268284	431.226963	409.9360439	415.0959038	425.7643704
RNF40	481.8270807	593.7157356	552.8608573	368.8375064	351.9814013	349.5555272	466.3794263	424.4832478	420.4425748	381.796562	390.1850796	380.7604992	413.1125959	417.8907648	444.4841126
RPLP2	700.6888535	813.5037151	715.2115131	630.5309055	581.9477779	568.4851609	465.9210306	419.856839	403.1555984	510.8390206	510.7033829	519.6797759	493.6120525	520.2771513	613.5205903
GTPBP2	86.51078012	105.4016014	99.97491337	341.9885523	312.1667924	333.7244962	465.3480359	437.3389326	462.436331	211.6516906	219.0453168	176.5936229	244.5140837	242.2868931	284.3085788
NUCKS1	409.7751518	177.4917197	324.2049528	600.6614441	819.1212999	799.2681796	462.4830628	652.8149485	739.105648	448.6707022	475.6606587	485.4374612	682.154486	599.0056299	412.4729543
TXNDC5	339.7321146	329.5921215	329.3960375	465.0322746	368.888975	397.0486199	460.2674836	427.9223482	418.8498422	387.0623031	380.9932486	387.3905601	430.8449937	416.119374	461.8906788
RPL30	506.4232829	513.9970335	554.0190276	527.6238988	406.4830041	444.5019363	459.6180897	407.3286876	435.6706529	491.4642697	443.7110491	460.28223	469.9286459	459.9711366	621.4635087
UBR4	191.6969032	145.4313242	178.1538893	392.633231	464.5040312	415.3147657	459.0030754	450.8906258	436.8861799	368.097841	405.6446168	378.2894365	480.0457629	474.690213	286.8359436
AP1B1	332.190087	414.444013	376.033073	405.4611578	385.0173978	380.7402715	458.7394979	412.6920465	407.6230193	362.9365103	384.4892224	375.1444476	314.3982273	332.3916369	365.4939852
SF1	215.7519082	240.6394423	234.8190249	640.6412148	595.6997906	578.9065933	458.6630986	444.9131418	449.4225398	350.8043134	357.1792845	361.7673246	434.9865741	434.2662883	440.3729538
NFE2L1	370.275832	443.2207269	425.9584849	397.9098895	376.3688233	370.1597332	457.4789097	419.9387223	408.4776563	427.20039	428.3963601	411.9607859	405.1913207	423.2049371	398.3034267
ADAR	321.0834276	208.8960569	254.4665565	412.2153478	410.5735461	382.1722241	457.2115122	451.7913426	445.7320617	415.7299492	417.4195757	417.2258343	426.4621561	433.7545532	322.3866898
CSDE1	614.5415641	230.8070452	441.0146985	462.7668941	651.9544827	652.8510318	456.9441148	635.6194466	697.733446	730.4685498	697.421881	700.7974403	708.3710922	671.6720158	469.3905499
SESN2	78.75631243	102.9435022	101.381263	351.1759288	322.4126262	323.7803813	456.3711201	412.7329882	405.7195095	325.0693501	341.9400374	291.3326773	321.4348931	324.676246	372.838191
UNC5B	258.3610926	283.4442744	278.2917737	289.3394315	288.9091392	279.4296288	452.016361	423.7053561	399.5428146	342.6426536	353.4449145	325.3019895	337.1970244	348.4916108	301.9506386
MTHFD2	315.9945582	139.3488	207.3952071	467.5074126	507.5388707	507.5476248	450.0681792	511.1977076	570.1205976	350.6940207	325.0410703	307.7128279	396.0637599	380.3372804	350.6060026
MYH9	338.8136949	391.134451	368.4222397	447.4546	453.0762255	427.2389528	449.99178	431.8936903	433.9225317	529.8461291	561.6266097	538.3219472	326.0589877	340.6974914	271.336476
TUBA1C	565.9582085	714.4020526	635.4015852	459.4892242	403.27524	416.7630266	448.7571675	408.4811956	385.9051383	514.714706	538.7077627	534.168019	408.5154416	410.1163275	516.4054418
PPP1R15A	79.96794801	84.76204378	84.54643067	403.1957773	373.2911774	378.3139075	447.1268068	405.3634873	424.3272886	206.504698	206.597417	147.9673598	236.1102942	242.0507077	277.6828279
MBD3	201.4081624	266.5117847	213.4396151	493.6893379	466.2972469	474.5439029	446.0579808	417.7954258	416.0477981	392.1754727	399.8355969	398.5415426	387.5839745	413.3394714	488.2907041
PSAT1	137.762965	85.31299706	111.4325265	487.7699826	435.3505434	435.5522329	445.9426179	483.5211378	490.6782004	240.0704429	217.4987596	217.4659985	355.6531936	350.5779155	341.1862603
TUBB4B	523.8510451	675.988742	582.5133256	487.4666733	456.2403572	453.9619717	444.2656537	401.2656355	406.5147104	655.37503	670.5894898	693.8698067	377.8287432	379.5732206	497.5807254
HNRNPL	655.9992908	716.7902232	698.6248601	359.4894557	300.7374284	327.7580273	443.8416376	421.3356521	419.2771607	389.2597013	382.0441531	428.5281382	350.4259561	376.0859426	376.1929764
C6orf48	198.6678466	204.6155737	197.7989391	391.029845	327.2823191	338.1396832	443.4978409	422.5180476	437.0691499	314.0400802	297.8065742	284.00061	368.0779349	363.7649357	421.0544992
RPL7L1	339.8520665	159.3806138	187.9797232	427.2969087	426.8893547	431.0678348	442.8301111	462.4967708	465.5969342	394.4441935	358.2452774	341.3155367	398.4111916	376.7334843	381.5534484
PA2G4	480.2446846	613.5572586	546.5910197	417.1668823	325.3765161	339.5875464	441.5252114	395.9215191	389.1904407	357.2630539	349.572486	352.56246	464.5638919	493.4685297	576.3597069
CALR	654.7678652	827.8285005	765.2610146	1186.220352	1004.831908	1022.891436	440.9766645	396.8885614	379.0315257	2281.551549	2344.052709	2379.72387	425.3362896	433.715189	507.9077166
HSPA1B	6834.213907	6057.264749	6157.512409	306.2593067	320.0381639	304.6367668	440.1691241	426.0009556	415.6185372	504.2688845	505.1486019	608.8002749	496.4801974	579.4057815	444.6357864
HNRNPK	454.4845045	240.6818233	349.7674255	503.4598401	523.1218879	517.1337515	440.0980727	505.0564569	532.4388737	581.683698	543.709178	569.3662325	478.8551591	466.2694149	372.0399078
TUFM	686.7146565	883.0933531	761.6210508	478.4148002	434.3376473	440.9220549	439.2576806	386.9806769	384.1205008	304.8857861	297.9951787	291.6056799	473.346455	489.4155876	606.6553544
UBE2S	620.9632326	768.622213	671.1596791	521.0794662	449.3363014	472.1863522	436.0489107	400.9417868	392.5114826	424.4063083	426.8498029	400.650682	453.5633718	459.5774942	619.6274572
AEN	200.0410336	273.2304481	246.2766381	296.6389909	243.1340261	245.4207559	435.8579125	384.1966433	394.3372981	230.3646853	230.0598222	227.4500903	340.0116908	348.2554254	414.3888341
CERS2	541.156836	674.7906305	610.3557392	430.4222948	335.0738277	348.6008921	433.9479304	395.2508945	373.5152321	494.9936361	483.7329332	480.0944121	353.6829271	356.3644587	411.0360445
NACA	523.8708351	455.5112233	588.3505038	436.7989214	423.9359833	431.3359281	432.0379483	440.4095579	445.3047431	591.0218132	598.1404493	578.7653189	488.8271197	490.5177863	433.4278896
PRMT1	280.6551872	362.2305941	322.8399664	459.5785808	447.0767639	456.9121917	431.3121551	387.3900936	387.4225075	275.9890988	276.5697026	279.3985677	429.9201747	429.8181293	517.5270298
PPM1G	359.9365417	425.6749838	388.2352242	367.0335923	329.7756018	332.4516495	429.8223691	398.5262282	389.9864186	298.1946956	298.3346669	302.1357766	401.9745592	421.7484602	422.730894
FTL	722.3771303	834.6518451	747.4334649	559.8845951	516.0316151	533.2034412	429.7077702	391.3204941	384.6643607	512.7507607	538.9563435	503.4946271	429.7995462	440.0134673	564.9450547
CHD4	398.4439358	230.0018058	284.2894413	380.6145484	397.6396418	391.5781635	429.3639734	430.8292069	407.5841721	504.0376374	490.4872391	503.2875352	405.915092	424.7795067	293.8879778
CS	562.9367933	643.1281929	608.9477351	420.987824	365.1989165	351.07817	428.3585588	399.3733114	378.4729038	407.9756372	424.6419981	415.5975693	429.3122068	426.4182399	431.9011729
SF3B3	361.2693409	412.6216291	387.3665965	412.2992508	349.4881186	354.0502671	426.1934031	403.8895872	387.1505775	313.2680313	328.6999984	355.6442684	370.7317631	373.2123531	389.4823968
STMN1	517.9742087	534.0008758	541.1137016	399.6299006	322.4905413	324.5361341	424.0542232	417.1546887	420.6368105	542.6768465	509.4585929	484.6964544	332.1306251	343.256167	363.6579337
MTCH1	434.7752325	541.5446977	469.4312337	386.7088415	356.7342216	341.2024706	422.1442411	379.5292928	375.9626018	332.9001318	332.8115775	329.2020254	328.0292542	340.1463921	421.9326108
SREBF2	434.2501904	501.1979649	470.217135	380.1644089	358.8768865	349.8737388	419.6230648	378.628576	370.407461	485.0672931	485.053165	493.9005389	327.5065304	331.6043522	312.2884067
SCD	871.0852033	512.7679838	653.0012236	292.1921329	282.5980172	270.5197019	418.0568794	428.9868317	399.8535917	634.5874296	600.2905411	629.6997869	510.861936	541.6912975	360.0656591
FARSA	204.8068002	273.4423532	224.8091246	370.3058086	357.9419054	339.6114123	417.1782877	374.8619422	372.5829008	243.9306874	244.8464184	255.1013444	369.7265251	379.7074526	488.3896912
RPS28	593.2571658	691.7006582	644.3563097	346.4354104	347.4233688	337.0657188	416.6434927	390.7882524	360.6956765	522.3462256	526.6216064	523.5798117	414.7611862	443.910527	472.3441979
HAX1	223.0621095	316.3319474	261.6223943	338.6743846	270.7159666	283.4072748	415.8031006	346.8987807	351.6054462	219.3721796	210.8976005	200.9298465	286.010307	293.4604042	420.5755293
TCOF1	251.2124427	295.7771518	278.1676841	429.1217986	417.8975642	409.6179812	414.8481095	411.9960381	396.4350435	357.3483469	361.4417472	364.5753504	425.2558706	443.8317985	394.950637
STRN4	279.2416124	363.2901196	316.4286666	370.2219056	370.7199795	360.2553948	412.9381274	367.9018581	354.0528159	310.7312992	315.3845177	319.2959343	395.9029219	415.3714535	472.3841121
POLDIP3	217.6905251	293.1071474	267.6614251	399.839658	350.5399723	347.288269	412.8617282	353.6541565	360.812218	242.5704108	244.0920002	253.8923333	268.3583283	270.0386818	345.6167323
ATXN2L	321.2853669	321.9686233	347.6992643	463.522021	508.8244696	463.952625	412.6325303	403.8486455	387.1117304	213.9678373	223.3832213	214.033967	412.4692436	405.6878506	347.5725262
PPIB	334.936461	477.7188787	407.8000293	521.7506901	413.5732769	435.4726799	412.2123343	354.841465	352.0327648	883.40776	844.9483549	859.0608948	300.2444767	299.3256759	395.7888344
PSMD4	231.422395	288.9538072	246.6489071	385.5761512	333.8661438	350.8681503	412.0977353	377.8506842	379.7307742	268.6362521	259.7461773	261.1073996	366.4695541	371.04732	456.8974171
SSRP1	429.7267509	498.6127225	448.7496215	560.0524011	504.5391399	507.9453894	410.6461489	383.0502765	382.1781439	443.5604738	446.2383499	429.4719468	441.9428208	450.0119841	472.4639404
ENSA	365.348514	426.8616525	376.5294317	454.292693	383.3422235	399.3158781	408.9653647	376.3358424	393.0941896	378.8921876	364.2330944	361.2993203	330.2407777	342.5082464	405.0090059
POLDIP2	253.6357139	319.2138569	282.3453697	386.4571325	337.1385774	343.827717	408.4687694	362.6203825	362.0164792	298.1579314	310.5939622	289.5386609	362.8104879	366.12679	450.3115803
PCBP1	364.1772662	432.7949955	413.1772485	338.9260935	289.7662051	278.7136526	407.3609797	376.3767841	364.8523203	356.3189484	346.0893373	385.1675397	297.3896009	307.0017026	335.2390501
GNB1	437.3196672	300.0152539	345.2174708	401.3079602	420.040229	417.5732731	404.992602	413.5108799	411.3911917	618.7052808	594.4438002	583.0553583	373.4258009	372.3069756	293.927892
TSPAN3	365.9139439	273.8661634	285.1994322	408.7753256	371.3433002	391.2014804	404.0376109	425.0154895	422.1518489	451.2441985	436.3554719	436.4920114	378.4922002	378.0935188	334.6004235
PKN1	446.9319761	566.9733108	489.8646665	394.5537702	376.4077808	364.0341585	403.5792152	362.2519075	356.03402	439.7002293	449.8972781	432.1239712	367.4345826	384.5886183	459.3720951
HNRNPAB	361.4308923	396.2625547	347.7819907	346.8968768	281.935739	282.3730869	401.3254363	391.4842608	383.615488	474.8468363	452.5754626	451.9751537	348.093804	357.8209355	363.4583629
RHOA	770.8425534	872.0742874	821.556363	463.0186031	337.2944076	344.7425755	400.7524417	382.8865098	359.413721	547.2723757	546.6514089	536.020926	399.3609405	401.1609631	454.3029965
VAT1	694.0248578	873.3880991	772.334126	404.8318854	377.3038043	367.1367223	400.4086449	346.8168974	348.0315095	476.7218121	481.8091668	471.8653364	357.1007362	353.7664189	421.972525
ATP5G2	433.8463119	476.9984014	445.151021	281.9140176	261.7946892	278.0374528	400.1030478	368.1065665	358.1706126	417.4946324	434.5448682	420.8138673	353.1602034	370.8111345	423.9682331
CDC42EP1	134.4511611	164.0145547	148.5353388	332.5494669	334.3725919	324.8543457	397.7728697	375.9264257	376.8172388	146.762819	153.1091684	145.9003408	264.4982145	278.1870794	317.7965611
SUMO2	427.9496854	409.0616233	400.1064696	570.4563708	445.362632	459.2192263	396.8560783	389.6418856	392.2007055	398.2669385	363.6295599	375.2224483	359.794774	358.1752137	388.2849719
SUPT6H	134.8550396	116.7173343	124.04831	331.5426312	345.9429822	321.1153585	396.244884	382.3542681	360.8510651	314.8121291	321.7970721	317.9309218	340.1725288	347.8224188	266.1476349
RCC2	280.8167386	273.1456861	263.6491923	441.8750517	416.37822	407.7087111	396.0538858	401.8834453	403.8159997	413.6711522	403.7268858	407.5537454	373.4660104	376.0859426	299.7553597
FLNA	522.7399753	665.3820436	610.3971024	331.6684856	358.6431412	306.5571743	395.1370944	350.3378811	314.5452766	555.7649136	589.6909657	655.5570246	423.4866517	454.6176001	417.4622246
SF3B2	366.438986	443.9412043	403.498254	524.9809549	444.9730566	445.4565713	393.1125134	356.4381902	353.5866503	369.0761373	367.6279762	369.0213913	383.5988091	408.0890692	439.6544989
CFL1	581.3831371	709.2887823	646.7967399	640.2216999	581.4023723	578.9463698	392.8451159	354.5548733	340.1066934	446.0604416	442.3153754	457.0842006	392.6057413	401.2396915	474.1004211
SERBP1	406.6652871	168.1678949	273.4109133	596.9277614	809.8104471	820.588362	391.7755259	547.3082617	580.8035606	410.2153143	402.821584	422.4518823	572.7443854	537.5186881	366.7313242
UPF1	188.0054535	230.467997	206.071584	420.6895489	389.6143879	383.6837295	391.4699288	363.6029826	360.812218	254.6658435	264.2726864	278.2675573	325.2950069	329.3999547	339.9489212
COX6A1	475.9437822	607.4120105	525.0018984	408.8101453	333.9179574	349.4210827	391.3790136	341.9448385	349.2155703	340.0728337	324.829456	320.9062591	375.838372	379.614553	502.7587897
ZNF768	221.727291	257.25026	234.404979	350.1653174	320.7362831	322.783981	389.9388871	358.7706372	371.3774741	225.3647496	225.5680164	217.739001	337.0679519	345.5377183	389.5965513
AMOT	358.1998641	50.7300832	141.9172229	243.1088887	399.0031558	373.0236383	389.101551	517.2570749	478.6744347	197.4974609	188.6422644	228.9711042	489.1487959	507.0901311	211.3454899
WARS	111.7128001	137.526416	125.6201125	300.0790131	250.8086621	246.8527084	389.0251517	346.4074807	337.5039351	247.4600538	257.3320392	237.863186	238.6032844	243.3890918	275.0484931
IMPDH2	440.3083683	591.8933517	510.587642	280.4457155	219.5647126	230.5045835	387.07697	347.6766725	334.2019284	237.717532	230.6256358	229.9461132	327.5869495	344.3583657	410.5570745
SND1	588.6125627	795.3222568	692.8753719	685.025892	571.8188167	572.7014656	385.4343854	339.4473966	317.1091877	412.0167617	432.4324974	440.9770526	551.2322929	538.3453371	676.3853961
RNF187	350.7684992	439.0673868	380.831207	361.8735589	327.2433615	323.8599342	385.1669879	347.2672558	341.3886489	430.7665206	428.1700347	417.9668411	404.5881779	419.9770695	459.6115801
RPS21	493.9030486	701.7449604	585.248262	435.4145222	336.3594266	347.8451394	384.8613907	334.5753377	337.4262409	421.2813485	386.1489424	404.7457196	380.7037238	400.334314	524.3124374
SET	416.3583717	134.3054584	259.3060538	542.0132601	673.1469966	669.6366977	384.402995	518.8128584	573.6945343	455.6191423	425.038822	432.7869773	541.3809608	507.4837735	344.1798224
DCTN1	364.1368784	452.3326466	406.133505	257.2746486	245.3514894	237.4256875	384.0981619	346.8991902	330.9341072	374.8113577	395.7115699	386.8445551	335.3071771	348.802982	356.5132986
CAD	297.5776974	357.6958247	345.1761076	288.5843047	274.6506784	267.4569145	382.378414	339.7339883	339.6016806	197.3136397	206.182487	205.4538881	373.2649628	381.8724858	365.9330409
SPTAN1	182.2299906	165.0316992	176.9932372	333.4304482	308.5437409	300.5111524	382.1874158	357.6664403	342.7871459	293.8565161	323.3059085	325.8479945	313.9157131	324.4400606	244.0751031
ATIC	251.7374848	294.251435	264.51782	394.6376732	295.2981762	333.7642727	381.8054194	353.6132148	347.2934139	266.1730485	270.4966363	272.1055006	365.9870399	385.4152673	442.0892628
EIF3B	442.5297002	502.8932057	442.214232	485.7143595	398.2629625	409.8566399	380.7358294	345.4248806	338.0089479	354.7380863	348.27715	357.0482813	540.2550943	542.7147677	635.1540664
POLD2	298.0219638	389.227305	328.6721811	332.5914184	292.9217661	300.7498112	380.5830309	333.7974459	331.4049345	253.9305588	262.2734782	256.1543541	362.6898593	370.1025782	473.7811078
PPP2R1A	596.6497454	724.7154743	655.3589274	275.1598276	261.6778166	257.9503407	379.8572377	342.9683803	329.8122018	506.4640768	518.1344019	511.4897006	297.8319056	310.3082987	351.7235991
HNRNPUL1	468.3375379	507.300832	497.6409527	369.0472639	324.2436307	328.076239	379.5134409	356.9704319	349.9738664	534.4048941	540.2765753	543.7039966	399.6424071	416.8279303	377.4682339
SMARCA4	540.8741211	631.9434174	603.8203498	253.3450525	258.0158075	255.0864356	378.5202502	361.0236573	333.5415271	531.1328773	562.9091206	573.8902741	360.5185453	373.3698101	332.4051445
MORF4L2	401.8591327	229.0270423	389.1865784	479.8411508	484.8266231	481.2951614	376.5720685	416.7862136	459.32856	435.5826352	397.9933077	439.8070418	462.4496754	437.5728844	391.2386199
RAD23A	376.1320706	457.6302743	410.7368183	428.4505747	398.1850474	390.6446099	375.3878796	362.4156742	344.4187257	260.5848851	256.0118074	247.5352748	416.8922907	409.9785527	450.1120095
PGK1	538.7739527	695.6844743	597.4917764	360.0696448	277.4945791	289.3339673	375.1586817	333.2652042	316.6818692	538.1916101	497.9914367	519.8357773	415.7664241	452.0195603	511.0609355
MFGE8	508.4022876	625.7134072	572.0533934	449.7199805	439.3631704	408.4644639	373.8980936	331.3409457	325.072851	464.1116802	471.398196	456.2651931	309.6132946	315.2288286	359.3472041
CALM2	298.8701087	298.9133474	344.886565	397.3645201	309.7903822	322.626864	372.9049029	371.4228418	383.5766408	351.0248988	310.8580086	320.7389476	302.4560002	293.8934109	339.1107238
HSPA1A	5919.09827	5051.26728	5142.300048	245.5286507	260.6236255	255.1373494	372.2990566	374.1221262	357.322968	533.3648339	536.0235429	668.8900771	496.9357713	570.6988054	445.8886919
COPG1	261.7940601	329.258159	301.7033588	466.0391104	411.9760176	402.2991126	371.8353129	346.243714	325.0340038	331.356034	336.8099938	331.4250458	375.5569054	375.6135717	379.703427
MCM5	246.2447369	308.4490773	276.678608	185.9290069	184.9314568	181.1022207	371.5679154	339.897755	340.9224833	373.0834387	395.1265186	393.474616	171.2121309	180.3669446	192.1068637
ALDH18A1	339.2175734	406.3068568	378.6389561	317.0274154	247.3024832	263.9168096	371.3387176	335.1894628	334.5515526	265.7686419	265.0648254	265.0854361	267.9160236	270.5504169	305.3433424
PHB	426.3745591	559.599013	493.1323613	317.6566877	288.5585213	302.2613167	370.7657229	330.8496456	324.0239782	400.0316217	398.9363304	396.1656408	338.40331	343.8859948	420.495701
XPO5	171.446434	156.3012087	165.5769873	256.4494628	235.7710505	222.9072797	370.2691276	353.7769815	349.3911594	227.0559044	229.0036367	223.940058	274.1082895	273.2271852	254.5725278
UCHL1	666.0764639	806.0446553	710.2479261	366.1945625	307.5698023	316.1433011	369.7343326	341.4944801	348.6142166	564.3309799	547.4058271	546.0830185	375.1950197	389.4304197	465.6386186
FLNB	240.7923768	302.3885912	287.1435038	361.6638015	326.1915079	320.9562527	369.3905358	334.2478043	333.0365143	274.2611798	299.8057824	289.1876576	321.274055	340.7368557	292.1317547
EXOC7	170.6386769	229.5356145	195.3585088	409.152889	373.0574321	370.3586155	369.0849387	325.5272283	313.9237224	292.6800607	296.637226	288.9146551	306.5975807	316.2522988	360.3450582
PRPF6	152.1410405	203.9374773	175.5868876	318.9152324	292.8828086	285.5154272	369.0467391	326.3460618	326.782125	188.7108091	189.660729	191.1017562	264.7796811	266.4171718	334.6004235
RPS13	515.7932646	546.1218481	498.6750333	598.0185002	437.3373781	476.840198	367.4423541	335.7626462	341.3498018	388.5611809	370.8342534	365.8623623	411.3433771	409.9785527	554.8068574
VDAC2	437.4408307	534.0856378	449.6596124	366.4462714	244.7702429	264.2747977	366.5255627	326.7964201	332.2595715	257.2393398	247.071952	246.248263	309.5328755	315.4256498	407.8029973
GLUL	881.0610029	1025.535968	947.093749	339.8070748	268.3395564	274.7360066	365.532372	339.6521049	325.8497937	484.8834719	460.0064816	478.0273931	403.1406352	407.6560625	409.4793921
APP	505.9386286	215.4227343	370.7799435	334.1016721	362.9284709	362.9999705	365.3031742	391.8117941	387.9275203	389.7744006	360.4232826	371.2054114	447.7329916	446.1936529	318.7145868
GOT2	314.8636983	374.1820423	352.621488	411.544124	316.5300372	325.9680866	364.8829781	328.6387954	320.8385129	323.782602	330.7369275	314.1088867	368.0779349	360.9700747	430.5141557
MICALL1	112.6013328	140.4507065	125.3719332	294.6672708	301.6872133	289.1748615	363.3167928	349.6828144	355.9174786	271.5038623	295.6942033	265.8264429	184.4812721	174.5410372	185.9201685
GSTP1	471.4070147	593.4190685	502.9354455	430.0866829	406.1323862	407.2711701	362.8201975	322.0062446	311.9036712	390.9876203	404.7453504	392.4606067	325.0939593	339.2803788	432.1905505
PI4KA	242.8117694	294.251435	290.1630192	307.1268636	322.1788809	316.0239717	362.438201	333.5517959	326.5101951	296.209427	308.7079168	322.1429605	240.2116652	254.8440854	231.0630862
UQCRC1	365.4292897	483.6522218	405.897321	368.8375064	343.8782324	339.9694004	361.3686111	318.0758442	312.4863783	308.0107459	306.3692205	298.6257444	342.3438428	344.6339154	453.1454858
MDC1	316.9638666	328.2833955	353.2419364	273.565671	277.8062394	264.9509975	361.1012136	353.7769815	344.5352671	224.5191723	235.2653076	248.7832863	275.1135275	282.8320596	223.5991378
MAP4	298.9912723	253.3537488	283.5862665	337.0802279	317.9325087	306.4776214	360.7956164	355.5374734	329.1906476	299.1873299	295.7319242	307.1668229	325.6971021	344.1615445	278.7205961
PDCD11	172.6984574	210.1674875	191.6771819	268.4895406	215.6300007	223.7425854	360.2990211	322.1290696	318.6630732	152.755389	157.9374447	162.5144935	294.1326298	301.2545236	305.3034282
RPL21	508.9273297	463.1821882	528.7874607	445.147268	344.3457229	367.2958282	360.0698232	334.9438127	354.7520644	464.0749159	429.3771037	416.0558236	410.9814914	392.264645	522.99527
PFN1	586.8758851	740.8202626	629.0519166	278.1383835	243.4456864	244.6252267	358.6564365	321.1055278	315.0502894	409.8844362	416.5897157	420.7358666	329.6376349	341.8784186	412.0738127
TNFRSF10B	133.8049554	114.4287591	128.8050808	301.8409757	258.7949584	265.1896563	358.2362404	343.8690971	345.3899042	195.6592492	190.9055189	174.4486032	259.6730722	266.77145	245.1527855
STC2	123.3848895	82.38870655	100.8021779	272.6007867	351.3580807	323.7803813	357.2048501	392.7534526	401.6017129	158.6009021	152.5810757	158.6144577	316.1272366	330.1478753	241.9197383
AKR1B1	492.974128	628.6800787	556.9558165	441.2038279	367.8371214	378.6321191	355.7914634	324.3399199	325.5390166	378.1569029	380.4908061	368.8653899	378.8540859	383.2108699	501.8407639
MRPL12	277.2626076	359.928457	300.4210988	474.1357481	407.2231974	432.3303396	355.1802691	323.803584	327.5979149	256.6878763	251.2966938	252.3713193	385.1669803	392.6189231	529.6609351
DHX30	399.5166372	507.258451	460.9104095	296.303379	282.0526116	282.213981	353.3466863	318.4443192	307.3197089	339.4441653	348.69208	349.6382132	320.7513313	333.8481138	355.9545003
PCNA	209.5725668	160.666454	192.5044463	385.2824908	357.1627546	363.9546055	353.0028895	365.3634745	373.4763849	254.2246727	244.0920002	253.8533329	305.9542284	299.9555037	284.0291797
PSMB4	291.398356	375.665378	317.1732047	290.7238307	253.029242	250.4325898	352.5444938	323.2344947	315.788385	301.4299482	293.9213206	302.4087791	290.7952398	292.3188413	371.4012812
HSPD1	436.1888073	159.3102613	279.449944	361.9994134	427.714865	435.9499975	351.2839056	425.711498	432.601729	492.6774894	448.3129999	465.0402737	431.9306507	427.298818	298.5579348
CTD-2568A17.3	176.4141398	213.4308262	194.4071547	318.6635235	310.0241275	310.2563851	349.9851178	317.8711358	317.6530476	274.1508871	273.0616581	267.5424587	348.093804	364.3947635	377.0291781
RAC1	321.9315725	246.4880233	262.9460175	413.0124261	346.8000481	357.9085837	349.7941196	358.1167987	345.1179742	343.1205886	322.0611185	312.4318712	335.1865485	338.5324583	327.0965609
BTF3	718.2171815	787.4817677	712.7297196	541.7615511	390.8999868	415.6640031	349.75592	347.3491391	316.3322449	468.0454531	438.0151918	448.8941253	478.2922258	490.3209651	577.1587884
NME1	250.5654293	314.4065775	260.2727123	457.6169291	341.087314	373.220134	349.6951825	315.9567033	336.9985339	213.6994584	204.0878449	207.4604566	337.2935273	328.4489147	455.285284
CCT2	275.0008879	174.1436189	230.8481554	386.331278	316.2183768	342.0775528	348.2279343	343.5415637	358.9087082	328.0840172	296.8635515	304.3197967	319.5450457	325.5028951	389.8815384
POLD1	304.6455716	399.1020831	347.7406275	202.4159427	230.6076177	213.0916428	346.7381483	318.6490276	308.2520402	315.1797714	327.643813	325.3799902	299.5291493	309.1655548	314.6832564
ACLY	505.7366894	477.5493546	497.5582263	301.8409757	296.1941997	279.6285111	345.8977562	330.2355205	320.022723	460.6926065	457.4414598	470.5783246	372.2597248	385.7301812	307.8978488
ARHGEF2	116.8824452	150.0711985	142.4549448	240.6337508	210.5655201	214.1564586	345.3629612	316.1925273	307.7081803	278.5993593	285.6604416	249.1342895	271.5750898	266.8895427	269.8197379
PTPRF	348.7491066	428.6416554	412.6808898	362.7125888	350.1893544	330.7412618	345.0955637	319.5497443	303.2019123	352.2381185	367.4016508	361.0263178	417.0933382	436.6675069	382.2579334
H1FX	731.6259486	903.6057677	805.5901584	248.2269706	216.9545572	224.6972204	344.9809647	314.3910937	302.7745937	460.5823138	463.4013634	454.7441791	291.8406873	319.2833452	353.8390497
BTBD2	314.1771048	390.7530218	352.993757	337.7514518	333.7882287	329.6275209	344.637168	314.6367438	293.6455163	299.5917365	322.664653	317.7749204	312.588799	321.9207493	365.3742427
SMARCB1	233.886054	295.8195328	262.0773898	243.1927917	229.2261832	226.4076082	344.4461698	308.6183181	301.6091796	332.7163106	329.303533	332.322054	214.8796683	225.7145483	263.2339011
H2AFY	326.0915213	372.2325152	345.796556	473.7162332	380.0308323	399.7931957	344.102373	327.8609036	328.3360106	317.017983	315.7617267	323.0399687	341.1375573	343.8466306	374.315015
NOC2L	407.5942077	522.4732378	447.9637202	290.3043158	274.767551	267.7353497	342.9945834	311.2385851	302.7745937	323.7090735	346.0138955	325.9259953	323.5257881	331.9192661	374.315015
EDF1	224.3545208	286.7499941	256.3279016	280.8652304	267.015	268.9286435	341.8867938	325.07687	324.2182139	302.7902248	291.2431361	274.6795243	268.6800045	272.1249865	326.3381918
NOMO2	367.4535288	455.7599999	408.2442704	395.5064886	338.9430908	338.2307713	341.7863287	303.6332602	297.6156938	223.7684466	222.1987848	219.7525895	320.8735682	317.8772546	355.3003072
PUF60	251.9798119	330.7414948	290.3698353	271.7617569	245.1987759	250.3928133	341.3137991	304.8107427	299.0452685	268.0847886	266.9508709	274.2505204	262.36711	269.566311	324.1828271
CYB5R3	291.1560289	338.3700788	324.784038	275.537391	284.5069368	270.7583606	340.8554034	307.6766597	296.2094274	295.9888416	315.4976804	308.1808322	235.9092466	249.8448271	257.3665192
PTMS	563.9355849	644.700105	572.715205	315.9786281	317.737721	316.6206186	340.7790042	324.0123865	318.041519	410.7300135	419.0415748	435.5560028	373.3051723	401.5152412	451.8283184
TLN1	310.0575439	416.5630641	377.8530549	332.5914184	311.1149387	290.4079317	339.5948153	303.9919092	287.35228	330.9148632	366.6472326	360.5583135	320.5100742	330.423425	332.0858312
PRKCSH	557.6754677	641.7758145	596.7472384	312.8742178	315.4002684	298.6416588	338.7162235	321.1055278	307.358556	338.7824091	357.4056099	368.2413841	317.1726841	343.1774385	340.1884062
PSMD2	381.6652064	507.0465459	434.8515781	346.6871193	284.7017245	292.078543	337.9522307	297.2365335	291.1981466	394.8478648	398.1819123	403.263706	288.2620401	293.263583	347.8918395
FLII	264.1365555	339.9381766	302.48926	320.845001	314.9327779	300.4315995	336.8444411	300.5528089	301.4926382	281.7978476	294.0722042	291.9956834	258.7482533	257.0878471	287.8210251
RANBP1	263.8538406	259.1599488	252.1915792	404.4962735	346.2546425	373.1429677	336.6916425	341.0441218	342.3209803	370.8040562	370.2307189	351.6662318	271.6152993	264.645781	310.2926985
GTF2I	261.3094059	89.16967005	152.5062084	342.6178247	412.9109987	410.9703808	334.81986	405.8547874	397.2896806	398.7081093	386.0735006	398.583663	374.5114579	364.8277701	230.6240304
TMEM259	270.6793876	297.8538218	284.6617103	320.1318257	347.5012839	330.8605911	333.5974715	326.3460618	308.8347473	261.9083974	270.5720781	276.1225376	297.4700199	313.3787093	299.7952738
LGALS3BP	465.0661219	568.7109327	520.9284481	310.6927403	319.2570652	298.4427765	333.1390758	300.9212839	282.1079163	375.656935	378.7179234	407.397744	275.1135275	288.6973313	308.9755312
DDIT4	79.28135451	91.9668175	85.6218745	171.0781792	155.1289364	160.0206971	332.1076855	305.5067511	294.4224591	190.4387281	178.1558518	179.9086534	335.0659199	369.1184722	374.1154442
HLA-A	278.0453242	343.4113013	303.5597403	197.8734353	178.3593193	181.3090583	331.8173682	296.1184164	299.567374	289.1775322	287.7856376	277.148247	191.0977485	187.1785326	224.2413567
TRRAP	187.4400236	81.20203794	118.1333689	341.9466009	416.1834323	373.7396146	331.4200919	327.5743119	331.7934058	279.2611155	294.6380179	307.4398254	307.6028186	320.8579148	169.7948469
CCT5	442.287373	277.9347415	342.8184038	436.9247758	406.8336219	425.1705769	330.9616962	350.7472978	342.9036873	420.8034134	399.124935	408.489754	477.8097116	489.6911373	430.5141557
NAA10	220.8407776	266.9580569	234.9844778	296.6389909	278.5464327	283.0492867	330.6178994	297.5640669	288.7119298	213.0854957	215.3109469	217.739001	257.4615487	267.0076354	326.4579343
PSMD8	247.294821	323.4519591	286.4816922	333.8919146	282.013654	296.8517182	330.2741027	293.5927247	282.3409991	339.7750434	343.8260828	326.3159988	290.5539827	292.7912122	392.5957014
ACO2	206.6242535	282.9780831	246.7316335	326.8440642	290.7011861	288.3793323	329.701108	285.4043905	271.8522719	266.5406908	278.9461198	282.9085999	248.2937784	253.8206152	300.9527845
STARD7	209.6937303	177.1950525	189.8158368	221.0843561	181.5421506	179.6304917	329.5865091	325.56817	319.4788631	303.4887452	278.3048644	303.6177902	316.7705889	334.9109483	259.8012831
EIF3CL	356.0314403	545.4594327	411.5082424	204.8566805	156.1254703	183.6682001	329.4318006	298.3579259	288.0736713	304.9563734	306.6415654	329.5596587	248.2021007	250.4880387	236.2203951
CDKN1A	151.454447	196.7750846	176.0005198	232.2854041	202.8908841	198.8822981	329.2427123	292.4054163	297.2583001	181.9461902	181.5884545	165.3615197	173.7453306	175.0921366	219.7673782
PRDX2	395.0739734	450.9340729	409.4131951	319.6284078	307.4139721	286.8678268	328.2877213	299.5292671	291.6254651	373.8554876	383.5839206	376.9384641	277.1642129	289.0122452	341.3060027
ATP2A2	291.5599074	129.3468788	207.1056646	400.0494155	424.4813889	413.5558507	328.0585234	348.8230393	344.0302543	419.1490229	400.0679577	419.7608576	351.0693084	349.3182599	242.4785366
RPN2	298.5470059	208.8536759	265.5932639	387.6317742	399.158986	394.2244913	327.6001277	345.3429972	333.9688456	344.591158	350.0123118	356.3852752	344.3945283	351.483293	287.7411968
NAP1L1	467.489393	158.1659737	322.7986032	370.1799541	426.8967566	431.0574929	327.5237285	434.554899	462.0478596	418.3402098	403.1610722	421.5158737	475.43735	440.8794805	302.5892652
PLXNA1	132.835647	147.4011941	149.6935091	300.2048676	336.7879596	326.4454041	326.8743346	319.9182194	307.1254732	375.7672277	389.8078705	382.7885178	267.8356046	274.6836621	220.8849748
LDHA	317.3273573	314.2128963	294.4234313	466.3327708	332.2688846	360.4940536	326.721536	304.8516843	288.2846113	466.5013553	412.7044621	450.4151393	415.525167	440.7613878	486.5935539
LARP1	313.7328384	202.5812846	251.6538572	294.8770283	353.033255	326.8431687	326.4923381	342.8046136	321.1881372	373.9290161	383.0935488	364.3413483	379.2561811	374.8262869	234.3759617
LMNB2	300.5260107	372.0206101	339.1370768	351.3856863	338.4241764	334.5995783	325.3845485	318.3214942	320.0615702	465.4719568	469.2481042	461.4132404	348.2948516	372.700618	318.0759602
TUBB2B	554.9343442	707.7918846	640.9107531	197.2139579	181.8230344	181.3488347	324.9315008	291.767545	268.6030973	365.9030163	373.6810504	402.8565423	261.2866802	281.565712	288.3798234
MAT2A	68.25547077	26.31861459	46.74044357	317.9503482	282.8317625	297.4483651	324.5441564	340.3071717	355.76209	352.6057608	367.6279762	342.3841465	254.4860443	238.980297	225.4751034
VCP	292.6907673	374.8601386	326.4385669	333.2626423	287.7793704	286.3507328	324.3149586	291.3409328	289.061554	462.0528831	452.6509044	473.1133479	254.0437396	255.6313702	294.2871194
NOMO1	308.0425939	394.2053799	369.6188778	362.4734653	312.7137563	304.4824342	324.1144104	280.3042865	287.4525056	207.5013764	213.9752495	204.2881674	289.9838117	306.7379622	323.3869387
PRPF19	130.6950908	159.5221664	152.8371142	442.839936	397.366939	404.6459237	323.7037643	296.1311084	295.2770961	168.3434239	168.2729737	167.9745437	313.9559226	328.0222064	375.6321824
HLA-B	272.9007195	310.3986043	292.1935398	220.7617491	207.0690806	211.1334477	323.4745664	306.1208762	290.460051	338.929466	337.7907374	327.6030107	206.6769265	209.0241109	224.8364768
KLHDC3	428.7574424	585.8328656	491.3951058	217.2667704	180.0228064	177.1643512	323.4363668	282.3337651	272.9011446	272.7906105	267.5921263	269.8434799	262.3269005	267.5587348	351.204715
PPIF	225.7680956	264.6271007	238.0039932	347.2744402	301.8430435	308.9039854	322.6341743	299.5702087	293.5289749	255.0334858	257.0302719	251.474311	266.5891095	266.0235294	316.0802521
TCP1	276.9798926	213.7698744	221.3346138	379.0317186	273.1702918	300.1133878	320.7241922	331.0134123	319.4788631	269.2612441	253.1072974	268.9464716	281.9491456	296.7276361	263.9922702
TPM3	279.5647152	303.8719269	282.6762755	332.2558065	258.4832981	261.6495514	319.8456005	300.3481005	295.4324847	394.2228728	371.6263925	374.8324447	307.321352	311.0562192	345.0180198
ANP32B	335.9865452	301.6257328	292.6034494	292.5277448	260.3532601	278.9523113	319.0052084	344.9745222	341.971356	347.4220039	333.415112	319.7639386	311.8248181	316.8033982	319.7922692
STIP1	230.8569651	231.2732364	241.478504	576.3295795	498.1501028	481.6133731	317.9356184	296.7452334	294.8497776	311.025413	305.0112678	306.3868157	354.446908	349.515081	384.5729548
PLD3	390.9948003	474.1164919	439.815165	269.5802794	277.2997913	253.9726947	317.8210195	289.4166743	273.5226988	263.2319098	280.945328	268.7514698	252.1941018	257.4814895	287.781111
MZT2B	297.7465187	379.2291981	322.9603334	323.2098066	286.942952	295.2459425	317.7140605	287.3564894	294.8758052	344.0628559	324.9105559	335.8160961	273.6446737	283.090289	348.386376
SRP68	206.8261928	194.6136525	192.0908141	455.0058683	404.6909571	394.9404676	316.9806273	301.9857674	283.8560375	246.7247691	237.7171666	250.3043003	292.1221539	293.8934109	318.4351877
PRMT5	131.0989693	180.2041051	148.5353388	305.2390465	252.6007091	265.507868	316.7896291	274.8004976	269.637985	128.6012878	127.1194623	137.9052673	259.9947484	264.2915029	329.8905523
NOP56	112.5205571	136.6364146	116.1065709	364.2647939	309.7903822	337.2248247	316.484032	303.0911925	303.7846193	304.1137372	299.541736	262.0824085	286.6536593	292.7518479	309.414587
FOXM1	422.2146103	466.4031459	457.9736205	358.3496337	344.3457229	322.9450757	315.7200392	298.9560837	284.7883688	343.3779383	363.4786762	363.7563429	320.7915408	328.6913984	326.6575051
LSM4	317.3273573	398.805416	330.864432	408.90118	330.0872622	343.7481641	315.6054402	286.9192323	297.4136887	200.1812499	191.0186817	193.9877827	304.7479428	310.7413053	426.0038554
EWSR1	155.4124565	144.5616657	151.3066748	301.1278004	315.1275656	316.8592774	314.5358503	320.2457527	315.6718436	343.2308813	345.1463146	329.9040318	259.9947484	269.9205891	224.5570777
CHTOP	195.1137156	180.8398204	177.3655062	324.2850233	281.1565881	298.0847884	314.0774546	306.8578262	318.8184617	216.3575125	210.6712751	202.723863	270.3285947	274.9198475	309.6540719
EIF4B	926.497337	416.4359211	683.858189	248.8981944	272.4300985	257.5127996	313.924656	328.2703203	307.1254732	706.4247413	617.9439263	681.4922629	382.9152473	392.1859165	308.2969904
RBMX	324.496605	238.5360722	282.4777321	266.8072858	280.9863436	292.4631814	313.8092931	357.1874227	366.993963	398.2110568	389.3476754	416.9181215	298.4599782	287.630954	246.2584078
H3F3A	417.0853531	349.2196204	394.7706137	239.794721	194.5929275	212.4460708	312.7022675	321.3921195	324.2959082	457.3838255	428.2077556	456.7721977	274.9526894	269.9205891	269.6600812
AP3D1	321.0026519	337.4800773	339.4266194	297.9814386	305.8556704	298.9598705	311.9382746	303.2549592	296.7921345	420.6931207	440.0898418	434.2689909	319.3842076	326.7231865	274.1703816
POLE	239.3384141	286.3261839	281.3112891	232.5371131	252.5617515	231.3796656	311.900075	300.7575172	288.0903756	364.7011935	398.8608886	382.3985142	274.9526894	276.4550528	231.4622278
CD276	424.5167179	521.5832364	475.6357174	295.2545917	290.0778655	277.7590175	311.7090768	280.4913899	277.4851069	367.3114541	383.9988506	369.2943938	263.9754908	271.2983375	294.5266044
AK2	250.6874006	261.9147153	252.4811217	340.3524442	255.7173125	282.0548752	311.4034796	279.5087898	280.9813493	227.3500182	220.7804786	215.8279835	344.917252	346.4446704	402.0553579
C6orf106	287.0768558	354.5172481	328.7549075	276.1666634	215.6300007	219.6853865	310.410289	279.3450231	276.1254571	209.7399505	204.0323952	212.3959519	247.4895881	251.0651185	286.8630852
ASS1	280.0493694	375.7925211	319.4068188	233.9215123	209.1630486	206.2409431	310.3720893	268.9867803	254.4876012	250.952656	253.4467856	234.1971523	314.8807415	320.07063	404.2506369
TIMELESS	227.7874883	264.7542437	253.1015701	267.3148989	231.9532112	237.3063581	310.3338897	282.8250652	274.4550301	215.4016424	218.3663405	222.1460415	287.6186878	292.9093049	289.6171624
GPS1	366.3985981	477.0831634	430.0948073	279.1032678	275.5467019	265.5874209	308.8441036	274.7186143	258.7219392	322.8634961	336.0178547	329.163025	295.4997535	309.7571993	361.9017105
EIF6	126.0319093	170.1598029	147.3358053	300.7405881	271.9357272	280.1985078	308.0331252	262.7976279	268.7056537	152.8943578	149.4792854	146.1632032	236.6732275	251.6221225	329.1633163
DUS1L	206.2607629	245.809927	217.4878339	372.1516742	353.4228304	369.881298	308.0037115	288.7206659	286.7307257	271.614155	281.360258	271.1304917	313.9559226	319.4801664	359.3871183
KPNA2	379.9204512	235.6774722	269.3101632	415.4816909	365.8689863	398.3874956	307.8058374	327.1972391	325.344004	441.0068301	421.6269658	432.7670871	321.6560454	321.7129061	283.1482741
SLC4A2	248.3449052	320.5700496	286.1921496	287.9969838	280.4163948	264.9112211	307.5835155	261.9448128	256.5853466	442.3840183	454.461508	446.7101053	285.1659071	288.0675034	335.4386209
CTBP1	227.9894275	286.7499941	245.6975529	276.6700813	249.367233	263.519045	307.316118	291.3818745	287.0415028	272.8641389	270.5720781	269.1024731	277.8477747	290.3506293	295.3248876
PSME3	170.1136348	212.4560627	186.6308685	287.3677114	234.7191968	231.5785479	307.1251198	282.6203568	281.5640564	262.8642675	271.8168681	259.196382	256.8584059	256.3005623	316.9583637
APH1A	326.9396662	435.0411897	375.1644453	314.0488595	253.1461147	262.1666454	305.0623391	262.3542296	263.2670544	311.0621773	304.0305241	308.921839	268.7604235	283.7374371	335.1592217
HOXB9	251.8586484	276.1547386	274.0727249	269.3285704	251.0813649	246.6140497	304.9095405	286.837349	283.6229547	215.8428132	217.1969923	224.6030641	305.230457	304.9941264	322.2270331
PIM3	335.6634424	424.9968875	370.6558538	284.8925735	266.7422972	265.9056326	304.8331413	272.8352974	289.3723311	319.6650078	314.403774	316.6049096	213.9146399	216.8969587	241.5205967
PES1	159.0473633	212.7951109	182.2463667	291.604812	253.457775	274.7360066	304.221947	269.9284387	277.6016483	196.6518835	203.8437906	211.5769444	242.7448648	253.781251	297.121025
DDX17	351.6974198	91.54300728	191.8012715	339.135851	572.7148402	548.9151428	303.5725531	462.7637105	507.1105397	469.7733721	481.7714459	482.3564329	372.9030771	335.029041	210.7866917
USP5	312.4404272	440.5931036	371.607208	246.5069595	223.1877641	216.1055051	303.4197545	258.0553541	254.4876012	301.0990701	311.1597759	308.7268372	256.9790345	269.1333043	330.0502089
RUVBL2	301.8588098	406.518762	343.5629418	221.8814344	218.0453684	212.4460708	302.5793624	263.7462464	253.4387285	267.9377317	280.115468	279.8275716	280.3809744	300.9396097	350.8055734
PDIA6	329.726428	232.290381	266.8341606	490.622684	391.7960103	417.2550614	302.4265638	291.0133994	295.3936375	581.683698	536.5799263	579.0383214	312.3073323	318.5354247	317.4772478
HDGF	659.3720804	759.1712451	705.9461508	310.7346918	267.8720659	276.4066179	301.5861717	278.6080731	276.5527756	613.4112313	604.1757947	604.8565586	374.1897817	386.2025521	410.5969887
FAM53C	125.3235064	142.6969007	137.9463534	353.4413093	296.3110723	295.8970831	301.2805746	268.4135969	273.017686	183.1594099	183.021849	172.3815842	241.980884	241.3815156	294.4068619
SCAP	320.2352827	381.3020539	346.1274618	252.4640711	254.0421381	240.4486984	301.2041753	281.351165	263.8497614	290.4374424	302.7102923	298.1577401	275.0331084	298.4990269	299.1566472
CBX4	123.8291559	154.5635868	142.2481287	291.437006	273.2871644	260.4960341	300.9749774	287.6971241	272.4738261	191.3578339	186.4544517	182.5216774	275.0733179	285.2726425	286.1845445
IRS4	1009.456813	434.9856705	712.6647793	125.2671513	276.629332	271.100836	300.9642815	439.1403661	457.0167668	497.693969	576.752694	644.1587798	649.8047219	627.1809779	258.552369
TBL1X	89.45909335	56.07009196	69.82112278	249.0660004	268.7680894	251.3872248	300.7075799	310.2150433	321.0715958	142.5349322	134.3995977	133.2252243	209.0492881	211.3072367	163.6480659
CLIC1	307.1092306	408.9768612	356.5923575	302.5961026	247.1076955	265.5874209	300.6311807	256.5814539	263.0728187	230.7323277	224.2885231	207.5599075	239.4878938	235.7524294	337.5540715
TUBGCP2	231.8262735	308.8305065	273.3281868	209.3798902	193.5021163	186.153831	300.2873839	278.6080731	262.1404874	190.1446142	195.9601207	191.2577577	240.6941794	244.9636614	299.7154455
TAF15	150.9294049	41.70292554	84.71188357	284.2213496	437.7659111	423.3010833	299.5615907	395.0052445	409.0603634	321.3193983	320.627724	311.2228601	331.8491584	323.5346831	174.7841172
KANSL3	115.9131368	126.6344934	127.1505518	192.4314879	163.8164685	166.9815775	299.0267957	280.6960983	276.0089156	192.8651675	198.3742589	196.0548017	232.1697614	228.4700451	243.316734
CBSL	155.4795004	235.1032094	178.2105569	280.4427789	254.1753729	252.8844108	298.9179267	269.3396975	266.7361038	155.1064617	154.6089517	134.6276772	251.3046672	262.4508311	316.395574
PTGES3	304.4840202	148.4183387	224.9332143	352.5183765	298.297907	300.3520466	298.4156014	328.8435037	338.4362664	305.8784204	274.6459363	303.5787899	308.8895232	306.5686959	240.9218843
ICMT	173.8697051	196.3088934	198.2125713	300.0370616	224.5123205	235.5561939	298.148204	276.9704062	266.6856025	299.8858504	286.3771389	289.6166616	241.3375317	248.4670787	253.0957038
SRSF2	207.3512349	135.492127	150.8103162	407.0553145	445.9859527	453.6107455	297.9572057	331.422829	346.477624	432.3473827	436.2045882	455.4851859	304.3860571	303.8919277	253.9339012
RUVBL1	231.5031707	294.8447693	257.1965293	299.2399833	240.7965735	257.0354821	297.9572057	269.1096053	265.3647998	194.3357368	189.208078	184.9396996	282.3914504	285.7056491	352.2823974
GTF3C1	331.5034936	414.359251	393.0333582	282.8789019	263.4698636	257.8707877	295.8944251	264.5241381	259.7319648	291.7977191	304.3700123	306.5818175	237.7588845	250.1203767	224.1180219
EIF4G2	248.7487837	69.84392407	157.6352482	433.862317	577.0001699	593.504554	295.6652272	423.0093477	453.151865	350.9513703	364.006769	379.6294888	352.7178987	326.6050938	243.6759615
UBQLN4	210.4207117	273.7814014	248.7584315	275.873003	250.8086621	243.1932741	295.588828	266.6940467	269.0164308	194.8872003	207.9553697	205.1418853	252.9178731	257.4421252	314.6832564
SLC20A1	319.5486892	267.5090102	281.6008317	217.057013	171.8027648	167.9362125	295.2450312	296.4177001	285.2156874	315.1430072	304.5208959	306.4648164	300.968248	311.3317689	247.1484936
SRP9	252.0201998	190.2484073	283.3380871	367.7887191	333.9440589	347.72581	293.9462434	329.4576288	378.7207486	276.3567411	267.1771963	266.918453	328.6726065	304.3249343	303.9064326
SNRPD2	465.025734	582.0609546	496.8964147	312.6225088	259.8857696	284.6403451	293.2586498	261.9038712	268.0840995	364.7011935	348.3148709	372.0244189	311.0608372	308.4581794	398.3034267
FLOT1	282.2303135	356.6786802	315.6427654	222.5946098	196.5797622	198.0867689	293.2586498	268.3317136	257.7119136	276.9817331	269.8553809	258.6113766	232.6522756	240.4761381	282.5124415
UBAP2L	202.666244	213.3460642	209.5460948	252.4221197	266.2748067	260.9335751	292.8002541	282.3747068	276.6304699	291.6874264	300.1452705	321.0509505	234.5823325	239.6888533	214.299138
MRPL37	279.4839395	350.6181941	305.6742283	252.7996831	212.4354822	216.3441639	291.425067	258.2600624	253.0114099	282.8640104	287.0561152	268.3224659	278.8530127	272.5186289	354.5575047
DDOST	383.7536622	487.8199715	435.4583766	335.8510493	295.5638667	303.7445808	289.822592	259.1726523	257.564683	339.9588646	352.1129892	344.94413	309.8288176	316.995102	352.3003588
CANX	483.3214312	126.9311606	281.1458362	630.1952936	898.7894754	859.2113043	288.8274914	418.0144638	443.5954691	774.9900362	783.9536455	795.0613066	516.9335734	476.149839	326.5776768
MAP2K2	318.3685562	394.8940715	339.4162786	287.3614187	270.6259746	276.9980939	288.2904044	268.3669234	249.7055185	301.7689144	305.0395584	300.2961297	286.8064555	295.7765961	354.1918909
SYMPK	236.0266102	274.5442598	259.2646905	221.6297255	220.4996936	219.725163	287.9107	267.0625218	255.575321	203.2326812	217.0838296	220.4300258	288.5435067	304.2855701	292.8102954
MFN2	246.3659004	294.1242919	279.6567602	267.6505108	229.1482681	236.94837	287.375905	253.3470619	251.0302059	293.2315242	296.4109006	299.7177544	286.935126	298.7745765	314.8029989
YWHAZ	362.9656307	105.3592204	206.1956736	335.3602168	362.2661927	370.3586155	286.7265111	352.0164897	358.6756254	355.2895498	318.6662367	349.1702089	325.1743783	315.0320074	241.3609401
TSC2	242.650218	287.3433284	279.6981234	225.6151171	250.6138744	227.600902	286.6883114	269.027722	260.4700604	196.4312981	212.4441578	208.1449129	235.547361	241.775158	235.3738157
UBE2M	265.9943968	329.9786364	281.2285627	346.8549253	315.5950561	301.8635521	286.3827143	263.6234214	251.8848429	247.0556472	254.2012037	235.367163	286.9753355	303.9312919	363.2587921
FAU	340.429209	431.5659459	376.8189743	378.1087859	337.0996199	341.4411294	286.2681154	250.3583199	260.3146719	304.2607941	293.6195533	301.7067727	311.0206277	315.3075571	402.0154438
MPI	136.1878387	175.0760014	152.9612038	226.7478073	202.0338182	202.4621795	284.816529	255.2713204	248.0389763	143.8584446	146.5080094	135.7212473	236.8742751	246.8531449	284.7077204
TTLL12	171.4060461	233.6465737	201.9766247	265.0495184	245.7052239	245.26165	284.3199336	248.352178	239.5703002	214.0046016	220.5164323	227.3330892	235.1854753	243.3497276	289.6570766
RPL22	552.5462104	370.6644174	482.8329184	281.1169393	262.5348825	278.5943232	284.1671351	298.5876086	311.3209641	462.7146393	418.4757611	428.184935	378.2911526	362.7808297	367.3300366
NUP188	207.9974405	243.1823036	234.9844778	278.3481409	252.1932132	242.4772979	284.1671351	263.787188	258.6830921	213.7296051	227.3363726	238.409191	239.4476843	242.6805355	229.6660905
ZC3H7B	147.0117832	174.186	168.3069601	212.4843005	207.9943223	201.1495563	283.212144	262.927413	255.9249453	243.3056954	243.4507448	247.1062709	202.0126223	209.7720314	181.2102973
AES	256.0185972	301.4138277	274.3622674	330.7455528	316.1015042	319.6038531	283.0593455	258.5875958	251.1079002	334.8854004	334.3581347	328.3440175	253.8829015	257.7964034	294.4068619
SF3A1	232.4724792	243.7332569	250.867956	262.0709625	254.4706711	239.6133928	282.8683472	282.1699985	270.9587877	238.195467	243.8279538	241.1392161	225.1733051	225.4389987	211.0660908
AARS	222.9005581	273.2728291	250.9920456	334.4792355	298.1810344	302.8181871	282.2189533	261.4535128	254.1379769	323.3046669	325.4560003	297.6897358	297.2287628	296.3733579	301.551497
SURF4	254.4030831	317.3914729	284.3308045	422.829075	363.2790888	358.7041129	282.2189533	255.5988538	245.7469951	336.1353843	347.1832437	356.3462748	303.1797716	305.6239542	352.3223116
GART	228.393306	177.4917197	190.8912806	256.9528807	217.1103873	219.6853865	282.0661548	275.4555644	277.6793426	171.7257334	163.4824183	166.4925301	282.4316599	283.6193444	299.7952738
XRCC5	330.9784515	136.5092715	229.1936264	267.1051414	270.5990939	274.2984656	281.8369569	300.7575172	305.649282	439.4796439	385.9980587	402.0546949	270.9317375	286.5322981	261.8369054
GLTSCR2	426.697662	507.0889269	448.4600789	271.5519994	249.8347235	247.2902495	280.8819659	260.5937377	246.0966194	412.4946967	404.1795367	404.0827135	300.8476195	314.8745504	351.2446292
SZRD1	308.3612541	363.2053576	343.1079464	289.213577	251.5098979	251.7054365	280.652768	256.3358039	254.992614	276.025863	277.0600744	275.5375322	262.1258529	267.0469996	301.6313253
GPI	456.4635093	515.5227502	492.3050968	289.6750434	273.7546549	261.2120103	280.0415738	259.2426625	247.8447406	318.6723735	340.2803174	330.255035	336.2722055	355.8527236	374.1154442
NSD2	300.970277	217.2027372	250.7852295	262.8680408	280.7670127	274.338242	279.7359766	288.6387825	282.1856106	349.6278579	343.1093855	336.2610902	294.8966107	303.5770137	215.536477
RPS26	312.6423664	395.6692203	333.9666738	281.4945027	224.9408535	237.6245698	278.9719838	247.6971112	237.1229305	249.0776801	240.0935839	247.3402731	237.1959513	243.8614627	324.661797
TOP2A	290.1059447	158.801689	302.9856187	298.5687594	385.9913364	402.6968772	278.7427859	380.9622512	424.9488428	510.9860775	533.5622536	515.0777336	429.9603843	394.1934927	271.6158752
HM13	215.9942353	273.2304481	241.0235086	373.9975398	333.593441	333.4062846	278.5899874	248.2702946	244.6981224	280.915506	287.0561152	275.8105347	239.6487319	246.7350521	307.5785355
ERGIC3	345.8815691	438.6859576	391.4615557	259.5958246	225.3304289	227.4815726	277.7877949	241.1873855	238.2106504	305.032843	307.6894523	299.7567548	260.9999864	266.1809864	345.1776765
SHISA5	207.593562	242.2923021	227.3322813	312.2449454	294.0125773	289.6919554	277.673196	255.7626205	241.9788227	155.6229992	164.8026501	159.6674673	267.1118332	275.1166687	301.3918403
COX4I1	353.3129339	456.1893196	376.3639788	287.074051	239.5499321	249.4381783	277.1766006	252.3644618	250.9136645	303.8563876	285.1323489	282.1285928	260.195796	265.0000592	346.2553589
IGF2BP1	251.8990362	123.879727	162.7229248	271.174436	327.5160643	299.1985293	276.7564046	306.0799345	284.4775917	302.2387613	311.122055	305.5678082	304.3458476	317.9843253	191.9871212
SFPQ	70.55757837	36.27815474	51.00085568	314.7200834	406.6777918	388.7751163	276.0306114	348.3317392	341.5440375	239.6660364	223.9867559	238.1361885	223.846391	215.8341243	164.6060058
RRP12	134.5319368	170.6259941	153.7057419	284.5569615	262.5348825	268.4911025	275.6868146	254.084012	258.1392322	106.8000975	110.4090998	96.68188851	220.8708866	224.3368	265.0699525
TK1	171.8503125	219.5336934	189.2781148	337.9192577	337.3333652	325.7692043	274.7700232	236.9294517	242.2507527	191.5416551	194.0363544	193.5197784	193.769671	196.7424682	245.4720988
SH3GL1	203.3124496	260.0499503	230.0622541	239.5010605	229.4599285	219.725163	274.6554243	236.1925016	237.3948605	188.4166952	183.4744999	194.4947874	216.6086776	228.4306809	276.6849738
KRT8	300.2836835	401.3906583	339.1784401	215.3789534	202.1117333	200.1153684	274.3498271	228.1269924	230.2469871	378.8554233	374.719507	381.3455046	207.1594407	207.0952631	270.6579353
MAP7D1	150.7274656	193.9779372	168.6792291	337.7514518	322.5294988	313.279396	274.1206293	251.7912784	253.6329641	190.2181427	192.7538435	186.07071	228.9529999	242.2475289	271.6557893
PAICS	324.7183343	167.0236073	254.3011036	310.8185947	315.2444383	326.4454041	273.8150321	308.127018	325.6944052	328.3413669	293.0537397	300.6927634	360.0762406	352.1524851	314.4836856
LRRC59	396.4067726	433.684997	417.313571	308.3015053	282.4032295	268.4115495	272.7454422	257.7278207	242.2507527	432.6414965	448.8033717	432.7089766	315.0013701	327.2349216	327.9347583
CDC25A	173.2234995	185.7984	180.8400171	334.1855751	273.2871644	266.979597	272.6690429	249.1710114	251.0302059	181.8726617	173.5916218	167.6235405	226.0579145	225.0847205	250.18197
NT5C3B	273.3853738	362.3577371	303.4819774	317.6147362	255.3666946	263.9963625	272.4016454	244.0942442	238.0552618	317.4959181	306.1051741	298.586744	251.9930542	253.781251	351.4442
NID1	409.5328246	206.1412905	300.6692781	284.9764765	340.0214356	318.8481003	272.2488468	294.4934415	277.9901197	322.8634961	318.8548413	316.214906	319.9471409	329.2031336	168.9566495
PPP4C	305.2110016	403.2554233	342.6943141	247.4718438	224.5123205	225.9302907	271.5994529	246.4279194	234.6755608	223.4897737	226.5140568	227.4890906	237.5980464	244.9242971	304.9442008
HCFC1	318.2562779	338.0734116	345.9620089	232.5790645	262.3790524	232.4138536	271.2556561	268.0451219	249.4374732	302.6431679	321.5330258	363.0933368	290.3529351	316.44912	208.2720994
RPS25	456.6654485	412.2401999	446.3091913	292.3599388	218.7076466	227.4417961	271.2174565	242.5794023	257.2845951	369.9217146	319.6847012	336.456092	302.7776764	292.2794771	389.6420534
HADHA	303.3127725	332.8605459	310.7205417	286.8642935	227.7068391	227.4815726	270.9118594	256.3767455	244.6204281	273.1582528	262.9901755	259.8593881	286.935126	297.5149209	329.9304665
MLF2	266.196336	340.9129401	300.7933678	294.4575134	274.3390181	276.4066179	270.6444619	252.0778701	248.6993776	351.6498907	360.3478408	335.1300798	242.3829792	246.6956879	278.7205961
SCRIB	172.6580696	209.8708204	179.4750307	241.5147321	237.5241399	230.1068189	270.1096669	258.7923042	243.6880968	237.1293043	244.2428838	254.4383383	263.1310909	271.9281653	272.0150168
NDUFA13	303.2101873	410.0927535	335.9955399	272.6125331	256.4734784	265.8833578	269.7173566	240.9155328	250.7505065	331.7490437	321.6201611	315.9064132	237.0407425	243.3465784	302.3058747
MAGED2	249.6373165	304.4652612	275.93407	285.5637973	240.6017858	244.9434384	269.6512712	242.3337523	230.4412227	221.7618548	217.0461087	228.0350956	254.3654158	256.9303901	313.5257457
BIRC5	339.5002884	429.5740379	380.7898438	384.107849	279.9878618	298.482553	269.5748719	239.4268936	239.9587716	307.0181116	303.1629432	288.4466508	288.5837162	287.7525895	351.5639425
FURIN	282.3918649	352.0591488	325.5699392	222.4268038	223.3825518	214.3553409	269.5366723	241.8424522	239.2595231	299.3343869	310.4053577	309.5458447	232.5718566	233.9416744	231.4223136
SRCAP	182.6237722	179.5073611	205.6955922	231.1208307	315.2206742	270.0662503	269.4407912	257.738875	253.9305332	290.968318	322.0415036	355.1407737	262.9453229	267.414268	171.5885893
QARS	577.7886183	736.1159692	638.3586421	127.3647258	125.9107791	120.4033433	269.4220733	241.5149189	215.0577561	423.6342594	435.3747282	444.4480845	255.4510728	272.9516355	292.3712396
HNRNPU	227.4239976	47.84817371	105.3934958	356.6296226	581.3244572	579.224805	268.7726794	417.8916387	458.5516172	509.4052155	534.7316018	512.074706	373.0639152	349.9480877	176.7399111
TUBG1	229.0564746	294.4942782	271.6376718	297.8291547	300.6641882	287.4342436	268.710796	239.4285313	221.9589502	174.7209154	175.1261084	179.5759803	248.7107511	253.138433	304.2325313
PPP5C	187.7631264	241.5718248	223.8577704	250.3664966	226.5770703	228.1975489	268.5816812	242.4565773	231.2570126	235.8425561	240.470793	239.3061992	239.7693605	250.828933	274.0905532
ACTR1A	314.4598198	372.0629912	347.4510849	210.8481924	190.7750883	186.9493602	267.6648898	237.6664018	240.4249372	224.1882942	220.0260605	227.4110899	215.2013445	218.2747071	252.4570772
PGD	296.8911039	381.429197	345.2174708	241.3469261	217.0324723	203.5361439	267.0918952	242.9069357	236.5790706	272.4229682	271.854589	281.5435874	210.6978784	219.1800846	239.4051461
DDX21	216.1153989	67.08915765	150.3553207	290.0106553	416.884668	427.079847	266.2133034	407.8199876	453.1907122	167.09344	177.1751082	173.8245974	380.9851904	336.0918754	207.433902
TUBA1A	307.2933992	393.5590693	352.0304075	295.8519809	252.2532078	257.6293446	266.1418701	238.284621	233.1356602	309.0974966	304.1206771	302.6817816	251.0240048	242.0589742	311.0359003
EFTUD2	249.8796436	319.1714758	286.6885083	202.6676517	172.3092129	169.447718	265.7167081	231.2385594	231.0239298	291.2830198	294.0722042	288.0566472	237.9599321	237.4450917	261.5575062
GLO1	255.0896766	125.1087766	195.2344192	277.7188686	292.0257426	304.8467865	265.411111	318.3624359	347.6818853	349.9219718	322.664653	309.6238454	290.7952398	277.1636092	238.2476354
MTHFD1L	140.2670118	148.2064335	144.3990164	232.3273556	179.8669762	190.6883474	265.3729113	248.7615947	240.5414786	169.9978144	166.8773001	155.5724297	179.2942442	185.1300176	183.6849754
COPA	141.2767081	105.5711255	108.9920963	245.8776871	243.7573468	237.4654639	265.296512	257.4821707	248.0001291	245.8424275	246.2798129	242.543229	254.8077205	244.1370124	228.4686656
CPSF1	295.4371412	346.9734262	328.3412753	220.5389867	235.5373052	225.2143144	265.296512	250.6858532	241.7457399	311.025413	321.419863	317.2679157	245.3986931	256.1431053	239.0858328
MDK	179.4836166	220.2117897	196.3512262	459.2849204	422.1049788	430.6597283	264.876316	242.374694	247.3785749	258.3055026	265.8192436	260.5223942	293.0871823	300.6246958	356.4334703
APLP2	363.4502849	231.3579985	304.1024258	235.26396	236.0437533	234.1640178	264.6853178	258.7513625	258.4500093	322.2752684	297.882016	303.1887863	261.4825006	273.3452779	206.5957046
INTS1	357.392107	443.6021561	411.0677241	226.4121954	253.2240297	228.2771018	264.5707188	259.8158459	244.309651	386.0979773	406.141024	408.9577583	308.5276376	319.9131731	286.064802
PCK2	80.21027512	106.8849372	89.13774858	183.8733838	154.9341487	158.0716505	263.6539274	231.9755095	223.7983621	89.55767212	87.88971727	76.86970643	163.1300177	170.9195272	209.3098677
PRELID1	290.9540896	380.5391955	319.448182	283.5501258	229.6547162	250.711025	263.5011289	237.2979267	237.3948605	243.4159881	251.5607401	237.5511831	272.057604	274.8017548	367.1304658
RPL34	356.301635	384.0568204	440.0219811	322.1874487	242.0432149	253.4556007	263.4247296	226.4074422	267.0352268	294.0403373	261.4436182	257.5193666	231.365571	216.2277667	301.9506386
LAMC1	294.8313235	74.97202772	150.4794104	294.9609312	426.8577991	403.0150889	262.2023411	330.2355205	331.1718516	284.3713439	268.6483118	264.0324265	338.0414243	348.2947896	176.3008553
PTOV1	283.6786219	327.6900612	300.090193	155.2624672	167.0429322	158.5418083	261.7439454	247.0420445	220.8071325	273.5258951	274.7534408	285.4377732	208.7959681	220.6369551	246.4699529
RAB1B	254.9281252	331.165305	281.2285627	392.3722927	378.784191	378.1150252	261.3237493	233.0399929	219.3697884	248.9306231	251.3344147	255.3353465	248.5752451	255.4739133	313.8051448
MTA1	218.4175065	234.5789562	231.6754199	236.7322621	230.7065699	235.8346291	261.1709507	259.9386709	252.0013844	202.7547462	201.2410479	201.0468476	272.3792802	282.6352384	260.0008539
CTNNA1	364.2176541	295.3533415	322.9640561	305.8683188	287.9352006	282.1344281	259.5665658	258.9560708	244.6204281	391.2082057	387.3560115	382.2035125	265.543662	269.8812249	219.6077216
DCTN2	272.4564532	353.0762934	318.3727382	247.9752616	204.1375255	205.5647433	259.4901665	232.8352846	222.1667823	238.5263451	242.3191175	233.9241498	240.0910366	244.3338335	300.2343296
9-Sep	373.9915144	471.7855357	418.0994722	338.7582876	320.3089189	310.8132555	259.3373679	230.7063177	223.759515	369.8481862	372.5316943	357.1652823	286.9753355	291.5709207	326.8570759
CD63	287.4807343	397.8306525	335.8693821	330.6196984	255.2887795	262.3655277	258.9553715	232.5077512	226.5953561	279.334644	272.9107745	269.9994813	235.7484086	239.137754	305.9021407
MORF4L1	336.7539144	172.278854	277.8781415	257.1626381	261.9115618	256.4388352	258.8789722	308.2089014	332.7257372	363.3041527	326.0218139	337.7431039	285.3669547	270.5110527	255.8896952
ACACA	199.5967672	75.09917079	115.0311271	188.4041448	182.6719193	177.5223393	258.8025729	245.0768443	249.7094032	181.5417836	183.6253836	195.430796	245.1976455	257.560218	174.7841172
TNPO2	206.4223143	230.9341883	223.5682279	206.4852373	218.0453684	210.0197068	258.7261737	248.9253614	251.1467473	191.1372485	194.1495171	199.6038344	237.5980464	247.4436085	214.3789663
NUP205	368.9430328	80.43917954	183.8595324	271.9295628	338.3462613	323.3826167	258.6497744	278.8946648	291.7808537	310.6945349	276.9846326	301.1607677	313.5940369	311.4498616	236.6510689
CLSTN1	219.3464271	269.4585372	248.7170683	286.6964876	269.0407922	247.0515907	257.7711826	250.1126698	236.5402234	251.5408837	263.17878	253.8143326	265.9055477	271.9281653	244.1150173
MTOR	173.7889294	119.8535299	144.3576531	261.5675446	279.0918383	267.2978087	257.6947833	258.4647708	248.0389763	222.4603752	236.1328885	231.9741318	278.0488223	283.5799802	199.0120138
HNRNPM	79.72562089	51.28103648	60.47303407	282.7530474	313.218646	327.0818275	257.6565837	288.9253742	289.8773439	262.0186901	244.5446511	257.9093702	194.5738613	205.4419651	148.0815425
RPS29	248.8699473	328.6648247	272.7077385	315.2654528	223.8500423	241.0851218	257.1599883	218.1781662	230.7519999	204.8870717	179.0234327	185.2517025	231.4459901	235.0832373	352.2424832
PSMB5	169.2251021	211.9898715	183.1977209	249.7372243	205.7737423	211.4118829	257.1217887	221.3716166	224.3810692	168.9684159	158.8427465	165.8685243	190.9952142	192.2943091	247.4678069
TBC1D16	141.7613624	178.042673	156.8493469	357.6784099	358.8379289	335.4746605	257.0453894	240.2047854	233.4324524	181.6153121	192.3011926	166.3365286	364.4992877	368.6067371	355.3957021
PIP5K1A	148.9504001	98.87492407	131.4936904	268.5314921	254.9381616	261.2120103	256.9689901	264.1556631	260.5866019	196.1739485	179.74013	176.9056258	254.7273014	250.3171979	218.8493525
MAPRE1	186.228388	106.0373168	135.9609186	276.8798387	240.4849132	243.9888033	256.8925908	265.1792049	273.8334759	280.1066929	257.4829228	260.4443935	220.8306771	228.9030517	214.8180221
PSMB2	236.066998	279.9690306	251.1574985	257.4562985	210.4428039	215.9066228	256.8161916	235.7012016	230.3635285	246.5041837	246.8079056	240.2032075	230.3201235	236.5790784	286.2244586
GRB10	128.998801	112.5216131	121.2769739	206.4432858	182.3992165	194.1488994	256.3195962	247.0011028	245.1642881	186.1373128	181.4375709	178.1926376	249.0175498	246.4595025	204.7995673
GPX1	312.1577122	396.3473167	340.7088794	193.9836931	185.2431171	188.9779597	256.0903984	226.6121505	227.0615217	218.1957242	222.9305704	222.0680408	220.2275343	225.0847205	265.1098667
NME4	297.2142068	379.2253839	343.1079464	264.336343	259.5741093	253.3362713	255.8612005	232.4668095	222.4775595	153.6377306	156.579492	156.586439	255.2098157	267.4012778	298.3184498
DNAH17	13.77225771	12.75668759	15.2630298	382.8493043	406.0934286	392.7527623	255.4028048	230.9519677	247.6505049	179.2624012	204.4850461	153.8954143	160.7576561	155.921752	139.0210277
PRDX6	325.0414371	355.4496306	319.6136349	286.0672152	215.5910432	227.8395607	254.9444091	235.7421432	224.8083877	258.8202019	258.5013873	251.2793093	259.2307675	259.7252511	308.935617
NMT1	190.6306639	210.4217737	201.0666338	279.3969282	243.8742194	239.2951811	254.8298102	234.6776598	221.9336995	241.5777765	240.5085139	242.3482272	247.5700071	248.4670787	259.1626565
INHBE	30.57360436	37.71910948	35.48964653	234.844445	215.863746	212.2074121	254.3714145	224.2375336	225.5464834	73.41817374	70.72670382	60.68455769	192.8850616	191.5070244	236.2918414
SRM	181.4626214	220.3389328	196.8062217	269.4963764	261.0934534	258.5072111	254.0276177	235.9468516	235.5301978	172.8654246	190.5660308	177.7636336	243.3882171	260.040165	311.8493509
LAMB2	171.9714761	203.8103343	193.000805	201.5349614	208.9293033	199.2800627	253.7602202	231.1976177	228.1492416	214.1148943	219.1962005	210.5239347	223.9670196	237.0908135	223.2399103
WASF2	280.0089816	276.1123576	281.1871995	246.9684259	238.108503	232.6127359	253.3400242	239.508777	233.6655352	227.3867825	234.8126567	235.913168	275.3547846	285.7450133	254.0536437
XPOT	172.4561303	51.40817955	121.5665165	302.3024421	389.4196002	399.5545369	253.1108263	365.6500662	408.5553506	199.262144	213.6889478	215.5159806	334.9855009	310.3082987	208.3918419
RP11-697E2.6	177.6653555	260.8229801	215.5139808	209.2141818	128.8657087	156.2789255	253.0157092	214.6383493	218.8469059	237.0561434	229.5969866	207.2627247	212.2013123	210.282192	298.1995056
UNG	147.2541103	170.9226613	161.1511223	259.6377761	195.0993755	205.6045198	252.9580277	245.486261	236.8121534	168.7110662	164.4631619	168.013544	193.2469472	188.7121634	205.4781081
NDUFA11	214.8484319	268.9380982	229.2196852	248.2542391	233.0685657	235.4185673	252.7062921	225.7073396	230.8728145	225.0669593	221.4805787	230.4480478	206.5422246	218.4778266	277.8109523
SSR2	354.4841816	427.4126057	371.979477	337.6675488	282.1305267	283.4470513	252.4614324	220.5937248	203.0539904	361.8703476	368.0806271	350.7692236	271.1729946	260.8274498	331.7665179
GDI1	252.6664054	293.1071474	277.6713254	291.0174911	272.7028013	262.484857	252.079436	230.911026	226.4011204	270.5847565	263.17878	251.474311	227.5054572	229.0605087	248.8648026
BOP1	237.8844514	297.1757255	258.7269686	165.2049705	161.0894405	163.4016961	251.7738389	225.0973087	227.1003689	206.3576411	203.5043024	205.0638845	225.8970765	240.6335951	277.2437721
IDH2	250.0815829	330.5719707	283.0485446	164.4917951	143.0910556	144.348772	251.0862453	220.6346665	208.2206598	176.2109698	175.2513418	164.8155147	206.3552504	222.4473165	267.0656607
CSNK2B	253.8089778	290.8245055	265.7897392	181.9146687	169.9686437	169.3439014	251.0087	234.8623067	221.5642632	241.4053522	248.3386201	234.7841077	200.5916179	207.1574586	242.5192491
HINT1	348.4663916	438.2621473	384.8434398	442.7979845	312.9849008	336.5884013	250.8188478	219.8567748	220.2244254	304.8490218	282.7559316	281.504587	268.4789569	260.3944432	373.9158734
TYMS	166.1960132	163.8450306	167.3556059	235.6415234	186.8014189	199.5982744	250.7424485	245.0768443	242.7946126	217.1295614	209.2756015	213.2149594	220.2677438	228.4700451	228.7480648
HDAC2	175.4852192	102.689216	165.2874447	166.9669331	186.1001831	192.637394	250.6660492	281.5149317	325.3836281	253.6732092	250.1273456	240.5152103	238.8445415	233.7842174	206.2364772
RAB5C	236.2689373	315.8657561	284.7030735	255.9460449	222.252783	227.0440315	250.2458532	226.3255588	215.1742975	238.5263451	243.0735357	239.3061992	232.3305995	235.6737009	283.5901239
MIEF1	112.6821086	89.12728903	96.58312897	172.7142873	153.8043799	150.2754645	250.1694539	233.1218763	226.1389022	150.696592	154.504842	161.0246798	190.9952142	202.8832895	172.3892674
CNOT1	176.6968548	26.19147153	76.02560644	229.3907513	359.6949949	339.0147654	249.940256	317.4207774	310.1943971	248.5262166	242.0173502	230.0631143	312.0660752	306.0175966	152.0330446
SGTA	171.2848826	214.3208277	189.3194781	259.8475335	250.2632565	251.2678954	249.9020564	224.810717	216.5339473	224.7765219	233.3415412	229.9851136	244.5140837	252.4428669	306.3411965
PSMD3	378.6765053	464.665524	432.617964	206.3593828	192.5671352	190.6087945	249.4436607	221.2078499	209.0752968	382.4215539	407.1594885	393.6696178	240.0106176	250.3959264	258.803429
DDX5	209.1283004	64.37677225	128.474175	364.0550365	489.1898679	488.2958183	249.4054611	348.8230393	392.7057183	321.2458699	331.340462	328.2270164	287.015545	253.5450656	175.4626579
EIF3E	234.4918718	270.0094905	326.3144773	225.2375537	180.6071695	179.5509387	248.6032686	210.8905488	241.3572685	253.0849815	230.2484267	239.3841999	230.6417997	229.2966941	309.7339003
UNC45A	282.1495378	380.4544335	318.703644	190.7534283	178.4255471	164.8734251	248.2594718	215.4350743	209.114144	308.8930875	306.2937787	309.3118426	200.3238225	216.0703097	239.8442019
SMARCD1	214.4594969	248.8189795	238.9139841	262.196817	234.5633666	236.9881464	247.6100779	226.8578006	211.8722908	249.1512085	262.9524546	245.7802587	255.2098157	256.3005623	253.1755321
UBE2L3	158.845424	176.4317703	167.562422	288.0808868	236.0437533	236.0335114	247.4190797	234.3910681	230.5966113	228.9297773	238.396143	226.9430856	187.1753099	191.1527462	208.1124428
KDELR1	378.6361175	475.2183984	426.2480274	264.7558579	225.0966837	223.6630325	247.38088	228.7820591	213.7369534	285.5477994	288.1123007	295.427715	237.2361608	246.4201382	283.4304672
DCAF7	310.5421981	288.8690452	277.2990564	311.1961582	271.8846929	267.9740085	247.0752829	234.145418	222.4387123	311.5401123	310.2167532	313.7578834	276.9631653	276.5337813	244.3145881
FLOT2	237.8844514	318.7900466	268.6127792	245.7098811	240.1342953	237.5450169	246.3876894	220.6346665	208.9199083	294.5182723	304.8603841	288.8756548	242.1417221	248.9000853	291.5330422
CYC1	254.8877373	329.8514934	290.2043824	236.8581166	215.3183404	216.6225991	246.2730904	215.5169576	216.6116416	237.9381174	241.8664666	226.2800795	248.1329404	250.5533834	314.8828272
MAGED1	232.7551941	281.4099853	253.0602069	230.0619751	198.6055544	203.4168145	246.2348908	226.3255588	217.7770558	281.0993272	282.7936525	287.1986394	185.4865101	194.0656999	217.492271
RALY	217.8924644	282.2999868	242.1816789	213.6589422	193.1514984	197.8878866	245.9674933	221.0440832	217.1166544	202.7547462	209.3510433	207.9889114	212.3866782	225.5964556	261.7570771
PDLIM1	296.325674	344.1762788	313.3264248	195.4939468	158.40137	171.4763174	245.6236965	225.9161421	220.3021197	164.3728867	161.2191638	168.7545509	214.075478	221.2270251	255.0514978
CDC37	225.6065442	284.8852291	263.2355601	187.1036486	193.7358615	198.6834158	245.5854969	224.2784753	217.85475	285.5477994	279.8891426	281.6215881	235.7886181	242.6411713	253.4150171
ZFAND3	123.6272166	119.9382919	121.649243	179.1748169	160.3102896	161.0151086	245.1271012	241.1873855	234.9474908	126.579255	119.0471879	116.3380691	174.469102	169.0300437	167.0407697
EDC3	189.1363134	237.4608656	217.5291971	182.6567906	158.7909454	152.7416049	244.7451048	212.4872739	211.7945965	206.9091046	200.0339788	195.0797928	196.3430802	193.750786	244.035189
SEC24C	205.1702908	237.5032467	227.2081916	203.0452151	197.4757857	192.0407471	244.6687055	226.7759172	217.6216672	230.2176284	239.8295375	244.5712476	207.8832121	206.6622565	198.2935588
C11orf96	35.17781955	38.99054014	35.47103308	356.0469164	324.3916694	328.7432902	244.4261378	241.4653795	245.9808549	115.3117528	117.8023979	91.84584406	178.3617855	174.1285	220.4411293
DNM2	271.0832662	342.1843707	310.8446314	250.5762541	233.4725554	235.397088	244.401308	219.7339498	209.5803096	298.415281	303.5778732	302.0187756	228.9127904	236.027979	263.7926993
COL4A2	216.075011	277.0871211	247.7243509	228.1322065	208.9682609	196.7343693	244.3249087	219.4882997	206.7444686	231.5043766	240.4330721	223.9790584	220.9915152	232.1702836	208.5914127
SENP3	204.5139882	284.2007756	249.5534327	191.658322	159.5069851	156.0537907	243.7706319	209.9018074	207.6989427	216.8053009	220.258044	209.8386984	202.7810262	212.8011096	269.6413216
H2AFY2	65.22638183	85.56728319	73.70926588	152.6195232	126.261397	140.6893377	243.5991155	221.1669082	216.8058773	118.3440667	116.8970961	109.2010036	143.8696582	147.8914472	172.2695249
TRPC4AP	138.4091706	177.8307678	162.0611132	262.4065744	221.5125897	227.3224667	243.4845166	212.1597406	211.5226665	178.600645	181.4752918	182.6386784	193.9707186	196.703104	246.8690945
HNRNPA0	247.4967603	195.2069868	208.470651	293.5345806	342.5536759	326.524957	243.2935184	284.3808487	303.4738422	299.040273	293.3932279	306.8938204	254.6468824	252.1279529	194.2223143
EIF3F	371.0432012	442.2883444	395.2669723	287.8291778	274.261103	268.1331143	242.4531263	224.9744837	211.5615137	296.0256059	311.2352177	314.2648881	268.5593759	279.9978344	311.4102951
CYFIP2	225.6873199	259.414235	243.7534814	170.1971978	161.9075489	154.0542281	242.3003277	224.8926003	218.0878329	216.7986833	232.209914	225.1490691	214.1156875	219.0226277	205.1587948
CD2BP2	157.472237	205.0817649	179.5577571	238.5361762	220.9282266	213.4802588	242.3003277	217.1955661	215.018909	181.1373771	180.1927809	177.0226268	188.1403383	188.2397925	222.5214554
HNRNPA2B1	475.0015336	148.4607197	304.2265154	256.6592202	422.2218514	437.5410558	241.9947306	354.71864	378.8761371	512.162533	516.1351938	547.6040325	367.9170968	344.7126438	181.8489239
GBF1	168.8616114	174.9064773	176.2073359	189.0753687	190.6192581	180.8237854	241.7655327	235.0461348	226.5176618	157.1303328	167.2922301	163.5285028	196.7451754	198.2776735	168.1184521
CHTF8	68.49779789	84.50775765	75.19834196	240.9274112	191.3594514	199.0414039	241.3453367	211.5046738	207.5214113	117.5720178	113.3890516	114.7390545	189.6683001	196.2700973	230.8236012
AP3S2	161.7557726	182.3490086	166.0199874	244.5746738	202.8943903	191.1736202	241.2697014	228.2870743	216.3587467	173.952543	172.7444102	167.9554335	240.6515573	243.5107273	284.8929222
ACTN4	266.196336	350.0248598	319.6963614	203.8003419	202.306521	196.8139222	241.2307377	221.3716166	212.2607622	387.4950181	400.4451668	398.3886612	211.7835354	228.6668663	216.2549319
EIF3I	304.4840202	366.6382204	321.0613478	281.0749878	249.0166151	259.9789401	241.1925381	226.8168589	227.411146	204.2253155	213.613506	218.168005	258.9895104	265.0394234	308.2570763
DEK	100.0810986	69.58963794	110.3984459	250.660157	279.1307959	274.8155595	240.9251406	298.7513753	365.1630974	172.2036684	176.42069	172.9665896	247.4895881	224.8091708	166.2424864
MYL6	338.2078771	450.4255006	378.1425974	230.5234415	201.8000729	215.7077405	240.8487413	215.721666	228.8484901	296.0623701	283.9252798	283.8056082	174.549521	170.2896994	207.2742454
SRSF9	218.7809971	232.9684773	207.4779336	284.4730586	230.1222067	241.7215451	240.6195435	233.899768	238.7156631	211.872276	192.6029598	210.9139383	222.760734	231.3829988	239.0858328
MARCKSL1	282.5130284	327.7748233	296.7397718	224.3565724	195.8006113	199.8767096	240.5049445	230.788201	223.6429736	265.2171784	272.3826817	283.6496067	199.8815178	206.7016207	226.9120133
SRSF3	153.918106	110.7839912	136.2918244	293.660435	281.4682484	288.4191087	240.237547	270.5016221	291.8973951	329.8487004	309.5754977	329.6310293	214.3167351	190.3260972	187.1175934
COL2A1	314.4598198	372.2325152	340.2952471	158.9541983	158.3624124	146.1784891	239.8555506	220.8393749	208.1818127	177.8653603	178.2690145	184.6276967	261.1608244	281.0606688	286.0248878
CRTAP	426.2533956	456.1469386	440.725156	240.6757023	203.0467143	206.5591548	239.7409517	219.9795998	204.4136403	273.8567732	268.950079	281.0755831	283.3564788	287.9494107	299.4360464
GHITM	253.3933868	206.6498627	251.3643147	239.1234971	245.0039882	241.6817687	239.3971549	267.0215801	289.8773439	260.4010639	252.1642747	241.3732182	210.0947356	191.8613025	201.3669493
EIF1B	75.04063	73.95488319	73.79199233	216.3018861	162.920445	173.7833521	238.4039642	223.5005835	221.3898396	84.37391524	80.11921008	72.73566844	149.4989908	149.0723744	171.8703833
NOP2	125.0424069	163.6755065	150.6448633	199.1823218	178.6203348	184.2453565	238.2893653	211.7912655	219.7582598	129.1895155	126.1432452	132.6363189	222.4792674	224.9666278	253.5746738
NAXE	186.4707151	237.0794364	199.2052887	329.6548141	287.3508374	289.9703906	238.0983671	213.469874	208.4537426	184.0417515	183.1727327	174.4096028	209.9338975	208.5123758	285.346347
SRSF1	186.3519748	57.50002764	122.1393972	326.5340427	418.8403367	401.7732678	237.8508334	294.0631445	332.3648472	307.0898019	300.2422133	314.8194732	263.7298106	248.2560864	170.3261044
C12orf57	177.9084904	217.0755941	204.3343285	251.2894294	216.4870667	230.5045835	237.5253725	212.0778572	216.5339473	250.4011925	246.9587893	246.4822652	192.0004521	203.946124	232.7793952
FOXK2	201.575772	211.8627284	210.2079064	295.7160581	302.3494915	297.6472474	237.1433761	240.9007938	217.7382086	210.1811213	213.9907151	213.9559663	263.5733956	267.4800063	218.5300392
HSP90B1	431.7865314	147.7826233	326.7281095	538.7410438	725.9738145	740.0808077	236.8377789	325.1587533	349.7796308	884.988622	890.4397708	916.1574195	442.5861732	404.5069234	281.7939866
ABCF1	213.6517399	205.0817649	204.0861492	190.6695253	174.5297928	181.5795382	236.3029839	232.6305762	227.5276874	249.9600217	251.6739029	255.8033508	217.1314014	222.526045	193.7832585
EIF3K	232.230152	278.3161707	244.7461988	237.1937285	211.5005012	216.9010343	236.2265847	221.6172666	210.9399595	174.0786443	173.8933891	176.7886247	234.2204469	232.7213829	293.2493512
ECHS1	200.9295663	238.5627722	217.2396545	218.2736062	177.1789057	181.0226677	236.188385	219.9386581	212.4549978	157.4244466	161.143722	147.1873527	192.0808712	197.9627596	246.6695237
MAPK3	232.795582	296.4128671	258.2719731	203.4227785	193.5021163	188.6995244	236.0737861	209.867007	202.1216591	180.5491493	182.606919	181.1566648	197.3081086	208.2761903	252.8163047
AP2A2	86.75310723	102.0535007	98.23765795	256.8689777	237.8358002	230.1068189	235.3479929	215.4760159	215.1742975	125.8439703	129.9108096	129.0911863	150.1021336	154.9770103	171.7506408
EPN1	241.6405217	289.4199985	260.1333182	244.073773	255.1329494	239.9713809	234.9277968	214.8618909	211.2895837	245.5483137	263.5182682	242.3872275	227.3848287	234.1778598	255.8098669
RP6-24A23.7	381.4543818	76.85544033	193.0268639	133.9255195	288.154142	333.1612616	234.485063	448.4058758	452.7762132	463.641098	516.8586808	564.7872004	615.5152505	547.170406	203.0078206
SQSTM1	111.187758	144.7735708	130.9973317	290.3882188	249.6788933	258.1094465	234.2784029	215.2713076	218.39861	127.535125	129.2695541	124.0991405	181.7068153	179.2647459	238.8463478
RBM39	102.3428183	41.36387736	90.04773951	270.9646786	361.2532966	370.7166037	233.6672087	320.6551695	372.1167351	156.8729831	161.4832102	170.5875677	291.9613158	263.4254896	168.3978512
NDUFB11	240.3481104	280.3928408	254.1770139	230.9429564	208.1111949	211.0538948	233.629009	218.833233	207.7544941	225.9897416	219.4979677	215.3599792	214.3971541	214.2201905	266.3072916
PPP6R1	171.356773	211.258375	193.6944663	213.8040944	218.7594601	200.9737444	233.4021031	220.3943389	211.3191075	205.4058151	214.3505725	223.3094222	225.3630941	239.1031134	243.3498628
DKC1	99.39450507	67.3858248	77.1424135	283.2145138	243.2508987	258.8254228	233.3998112	249.2119531	249.1266961	157.0200401	144.8860103	140.5572917	264.0157003	267.9130129	230.5442021
PCSK6	205.2510665	232.5446671	220.0523538	197.2559094	187.5805697	178.9145154	233.3998112	223.0502251	220.6128968	267.9009675	273.1370999	264.2274283	251.8724256	257.0878471	260.0806822
ATP5C1	198.8697859	206.3531956	203.3416111	191.0890402	139.5459192	152.8609343	232.9032158	200.8598393	200.5677736	199.1518513	182.6823608	180.6886605	175.554759	172.9664676	272.8532142
GOT1	116.5997302	140.3235635	127.7296369	207.1984127	158.5572002	164.5949899	232.8650162	203.2753979	207.987577	95.43994944	95.8111081	92.11884657	160.7174465	166.9043748	210.1879792
SRPRB	107.1893606	122.5235343	114.0384097	309.6020015	228.1743296	237.903005	232.8268165	214.1249408	220.2632726	135.3291425	133.4188541	124.918148	203.6612126	201.3480842	243.6759615
POLR2E	231.6647221	298.9133474	253.4738391	212.1906401	197.7484885	198.4845335	232.139223	206.0184899	199.9850665	239.3719225	245.2990693	239.4622007	222.9617816	237.2482705	272.5738151
SLC38A2	85.21836884	18.98669781	53.02765368	377.605368	572.55901	534.0785233	231.9864244	382.5589764	424.4049829	167.8654889	189.8870544	198.9798286	330.964549	279.4860993	144.9283237
BCAP31	251.6567091	316.2048043	266.916887	278.012529	242.12113	250.0746016	231.4516294	209.3757069	208.9199083	230.8793846	235.491633	235.2891623	228.5911142	239.4920321	298.0789649
RBM4	95.87066494	115.7374851	102.450916	267.5246563	244.6510328	256.6102717	231.1223485	211.7122481	206.2546061	148.852498	148.9508154	161.6467355	165.4159288	170.2731664	203.2876188
ANAPC5	169.790532	177.4917197	178.606403	197.5076183	160.2713321	177.9996568	230.7258362	205.9775482	204.9963473	185.4387924	179.4383627	178.1926376	218.418106	223.352694	242.9575066
RTN3	188.8527907	129.5155553	156.3529882	424.1706836	352.6826371	353.612726	230.6861086	239.385952	234.1697711	244.9968502	232.7002858	228.5421003	240.3322937	241.498821	223.757597
XPO6	235.7438952	263.5675751	256.3692648	227.3351282	208.0722374	218.3727633	230.4202391	214.0430574	214.4362019	145.181957	149.3747985	145.8613405	240.5735508	236.342893	220.1665198
DAZAP1	176.8180184	215.6346394	202.1007144	163.4849593	139.2732164	146.9342418	230.3056402	215.844491	206.1617615	222.5706679	217.2724341	214.8139741	200.9269653	210.6774089	224.5171635
CARM1	233.7245026	293.5309576	260.6710402	234.2571242	218.0453684	214.7531055	230.2674405	212.855749	203.6755447	166.7257976	170.0835773	177.4906311	238.6032844	250.1203767	277.962227
CD81	243.4983629	302.6852583	272.3354694	325.5016165	300.5574445	307.7106916	229.579847	209.6622986	202.6266719	249.224737	256.577621	244.4932469	234.542123	245.0423899	282.5922698
ALKBH5	264.7423733	321.7143372	302.4065336	182.1953242	167.3616049	147.4911123	229.579847	211.6684405	198.2757925	185.6226135	191.4713326	196.7178078	183.5162437	191.4282959	183.2858338
COPE	257.1090692	330.8686379	286.2335128	266.9792869	272.0292253	256.5466294	229.4652481	203.5619896	200.7231622	255.217307	256.2381328	251.903315	221.6348675	227.1600032	281.0124673
PLCG1	131.7855628	153.0802511	146.2189982	211.7711252	215.6300007	210.2185891	228.9304531	209.6622986	204.0251689	225.1074	237.6040039	235.1721612	207.2398598	207.6069982	191.7476362
LRRC41	163.8535177	219.7455985	193.538527	209.3798902	189.2947016	180.6646796	228.8922534	206.7963816	204.6855702	273.0847243	283.4726289	281.3485856	158.9482277	162.338123	187.3969925
TMED9	174.0312565	217.3298802	193.7453431	298.9463229	261.0155384	259.3425167	228.5484567	210.8496071	209.3860739	188.5637522	186.0018008	187.9037268	224.2082767	224.2974357	250.2617983
GPX4	375.1627621	453.7312203	399.2792051	244.9547543	237.4851824	239.6929457	228.4338577	213.7155241	199.9462194	252.9746888	247.5246029	244.610248	227.7065048	231.1861776	282.8317548
HN1L	203.5943568	222.6262365	201.8926574	246.9667478	195.9139778	207.907179	228.2783852	218.7067232	205.1121118	169.9956085	174.6836422	172.5356356	202.3314838	203.1175068	221.7614898
PDIA3	270.8813269	178.2969591	208.8842832	394.4698672	332.3857572	345.6574341	228.0136617	232.8762262	210.6680295	516.427184	482.9407941	513.166716	245.4791121	253.9387079	222.4017129
ECI1	196.2849633	254.4132744	210.6215386	180.4753131	155.9860023	161.8106377	227.5934656	199.9181809	201.228175	154.3362511	164.6140456	147.3823544	168.7995598	172.0217259	221.0047172
PEA15	106.9066456	127.0159226	125.0823906	292.1501814	238.1864181	244.6252267	227.555266	201.7605561	203.3647675	158.6376663	160.6910711	142.9753139	185.6473482	189.0664415	243.2768199
COX5A	315.0252497	400.9244671	339.8816149	163.4430078	120.807341	128.9155056	227.1732696	217.4821578	193.1868174	293.4153453	289.621137	281.0365827	195.4182612	212.0551573	261.8768195
SEC11A	260.178546	223.3479854	258.3546996	207.911588	159.5700963	159.7820383	227.1350699	208.4749902	218.0101386	262.1289828	244.0165584	247.3792734	214.6384112	209.0241109	250.4214549
CSE1L	136.2686144	104.1725518	150.7689529	252.0026048	264.8333776	284.7596744	227.0968703	256.2129789	289.061554	246.2100699	244.8841393	241.997224	308.0853328	292.7912122	247.6673777
MEGF8	143.4172643	166.1759868	158.1316069	250.995769	270.7938817	234.0446884	226.9440717	216.4586161	205.5013601	233.2690598	240.6971184	237.3951817	250.9073972	260.1188935	219.727464
NUDCD3	183.1992991	248.0137401	204.5825079	222.3429008	188.5934658	190.9270062	226.9058721	202.2109144	209.9299339	157.8656174	155.5987484	160.174472	189.1053668	196.1913688	237.5690946
HES4	327.545484	346.0410437	326.2731141	126.9452109	134.2476933	143.9112309	226.7530735	222.2723334	236.3459877	228.6735306	227.9474513	217.8950025	209.4111738	228.0764027	221.6433438
LRPAP1	199.6775429	270.0942525	227.7872768	263.4973132	244.1079647	237.1074758	226.485676	201.637731	203.5978504	264.5921865	260.5760373	254.2823369	194.2521852	201.1906272	242.7978499
RNASEH2A	144.6692878	181.8145839	155.7739031	228.9712363	208.5397279	201.5870974	226.1036796	209.744182	205.5013601	136.2114841	134.8522486	133.4202261	183.5564532	186.5864944	233.3781076
SCRN1	143.49804	42.16911678	84.2568881	206.8208492	242.3159177	229.8681602	225.9890807	236.0696766	241.4738099	178.3800596	159.4085602	167.1555362	221.1121437	226.7773828	159.3772505
SUPT5H	142.3671802	179.1869605	165.5769873	197.0881034	185.5158199	182.7330555	225.7598828	206.2231982	206.7056214	179.1888727	178.7216654	187.3577218	181.5861868	188.318521	197.2557906
NCAPD2	448.2647752	477.7612597	465.9153596	173.5952686	147.9607485	153.4973577	225.2250878	216.9089744	207.3660228	342.4955967	360.5364454	369.8403988	254.1241587	261.8509201	213.9798247
HTT	194.0636314	158.6321649	170.3751213	201.9125248	218.7076466	200.8711211	224.3464961	221.821975	204.8798059	198.2695097	213.1231342	211.7329458	232.5316471	244.5306547	165.9630873
CIRBP	59.24897966	65.94487006	60.96939276	280.0262006	246.3285446	251.0690131	224.2318971	214.1658825	213.620412	132.7556462	137.4927122	127.6871734	195.3780517	200.8363491	209.0304685
RABL6	368.7087833	471.3134111	389.8628671	168.0878769	167.7741653	159.0334453	224.1776536	207.3818475	200.3024477	339.6974709	352.6761624	339.4641897	236.8927715	247.8494538	277.8604459
SRRT	156.4625407	183.7217299	169.4237671	213.7008937	203.6310775	210.9743418	224.0408989	209.4985319	203.6755447	210.1811213	219.5356886	233.2221433	150.986743	154.3865467	166.0429156
MAN2A2	200.3237485	190.8841226	201.107997	209.5476961	224.0837876	210.0992597	223.8499007	222.7636334	211.4449723	229.7764576	242.130513	231.1551243	265.7447096	268.4641123	226.6326141
YWHAG	220.5984505	66.4110613	124.6273951	215.9662742	260.8207506	255.3250943	223.7735014	258.1372374	265.5978827	227.4235467	207.2386724	210.7579369	257.2202916	264.7245095	192.5459194
MPRIP	200.4045242	180.5431532	175.8350669	202.6257002	277.1829187	265.7067503	223.4297047	246.8782778	244.309651	256.5040552	260.8778046	263.33042	244.5945027	251.7343105	180.2922716
RNF10	210.0976089	242.8432554	224.2714027	208.1632969	183.9185607	183.6876905	223.1623072	208.1065151	204.8409588	221.4309767	225.6464759	223.2380516	191.1560523	200.6395279	206.5557905
EIF3H	225.8892592	186.3069722	217.69465	167.386448	150.8436066	155.4464042	223.0477082	214.4524742	202.3935891	265.1804142	246.6947429	251.0453071	216.246792	221.0695681	233.0587943
SEC13	189.0555377	210.0827255	201.5216293	237.6551949	218.8245192	225.8109613	222.971309	203.3163396	201.0727864	174.188937	175.4399464	178.5826412	229.5963522	232.1702836	261.8369054
FKBP1A	298.8850522	346.5818256	307.6944082	278.588523	234.2513167	237.3823311	222.8975837	220.3824658	214.3631693	346.997377	330.2733375	340.59208	243.7452777	237.8812474	242.6353993
ELAVL1	228.1105911	200.6741386	211.8624354	268.3636861	258.7170433	249.6370606	222.85671	234.3910681	231.4124012	192.8651675	191.8485417	185.641706	227.022943	227.2891179	179.6935592
PYGB	91.51887383	118.5820992	104.8971371	309.1405351	279.9099467	279.5091818	222.8185104	192.8352717	193.6918302	159.2994225	156.4286084	140.8692946	201.4094795	196.1913688	242.9175924
GNB2	265.3481911	340.4043678	301.9101749	207.7018306	194.7877152	186.9095838	222.5893125	201.7196144	187.0878167	236.2469627	242.9980939	245.0002516	185.0442054	184.697011	224.1978502
TIMM13	194.9117763	225.8484656	201.0252706	197.7593273	186.5676736	192.9556056	222.5511129	204.5855314	209.6580039	186.2843697	190.9055189	184.2376931	186.0896529	199.0255941	216.6540735
AAMP	188.6516592	226.1875138	202.3075305	259.4280186	245.0819032	242.7955095	222.2455158	204.257998	209.9299339	206.4311695	202.8253261	194.5337878	210.2153642	216.7395018	239.6845453
SNHG1	57.4315263	39.96530364	45.21000427	316.1464341	268.4564291	289.9306142	221.9781183	227.1443923	232.3835796	79.92544302	78.87442009	77.6497136	294.6553536	275.5496753	305.3832566
LMAN2	251.8990362	336.7595999	287.1021405	215.2111474	195.1383331	194.109123	221.6725211	195.8649554	190.5063649	246.7615334	256.8416673	259.4693845	191.0756332	199.1043226	236.2918414
MED24	240.8731525	271.4504452	258.8924215	154.8849037	169.0757368	161.8901907	221.5961219	207.9427484	202.8209076	221.320684	231.1160076	233.9241498	209.6122214	217.7236078	201.8858335
EIF3G	327.6666476	411.8587707	354.5655595	135.671121	136.2734855	138.4618559	221.1759258	199.4678225	198.8584995	292.9006461	296.8258306	305.7238096	205.1891743	216.9756872	234.6553608
UBE2I	173.3042752	213.5579693	182.6186357	245.2484147	197.2030829	193.2340408	220.7939294	202.4565645	197.4211554	148.7848518	149.3370775	141.571301	179.4148728	185.6023885	225.3154468
WDR6	248.7487837	321.9262423	284.8685264	179.5523803	192.7229654	191.4441002	220.7175301	209.0481735	211.7557494	319.0032516	319.8355849	343.203154	178.4900538	186.2322163	178.6557909
WDR82	126.4947541	108.495416	104.9385003	216.8472555	184.9704143	189.6541595	220.6029312	212.3235073	208.8033669	149.7774861	147.9791248	155.8454322	195.9007755	202.2140975	195.2999967
PLXNB2	154.9278023	185.1626846	175.297345	172.7142873	177.2178633	170.0443649	220.2209348	200.1228892	180.134179	250.4747209	263.1033382	255.4523476	175.5145495	192.0581237	174.2652331
UBE2D2	164.2170084	165.7945576	150.5207736	386.0795691	286.8054318	314.7909015	219.9917369	206.7144983	202.4712834	129.0424586	123.3096505	123.3011931	237.5980464	239.8726843	278.7098193
PMAIP1	192.9327715	120.1925781	205.7406782	398.0776954	391.1726896	391.3605862	219.8389383	265.916155	315.3610665	119.5940507	118.8963042	111.3460233	284.8040215	251.7343105	198.4532155
NEK9	65.18599398	33.48100729	41.07368183	264.1265856	271.5730325	274.6166772	219.8389383	232.0573928	229.66428	90.73412758	83.51409186	84.04577238	196.021404	198.9862298	150.3965639
COPZ1	285.5017295	331.7162583	301.9929013	280.0262006	213.136718	228.0782195	219.5715408	197.2569722	197.0715312	251.5408837	245.6385575	231.1941247	249.9021592	248.9000853	310.891411
CIZ1	218.2155672	252.6756525	241.2303247	164.1561832	173.9843872	169.7659297	219.4569419	207.7380401	198.3146396	227.313254	238.4338639	243.5572383	197.2678991	202.6077399	203.2030008
CLPTM1L	266.6002145	342.692943	305.2192328	314.6361804	275.7414896	275.9293004	219.342343	197.2979139	194.7018558	251.7982333	245.1859066	257.9873709	250.1434163	260.7487213	287.302141
SPTBN1	240.1461711	48.48388904	117.2647412	219.9516658	375.62863	327.9569096	219.2659437	278.5261897	269.1329722	250.4379567	241.9041875	242.66023	316.8510079	323.1410407	148.9596541
NUMA1	128.9584131	139.8573722	141.5449539	201.7027674	226.5770703	214.4348938	219.1895444	206.7963816	204.4913345	201.1371199	216.3294114	210.5629351	203.8622602	210.0869453	162.5703835
STT3A	215.3884175	212.964635	224.9745775	301.1697519	255.249822	247.5686847	219.1895444	200.9826643	188.2532309	235.511678	227.9851722	232.9881412	229.113838	226.3050119	237.9682363
XRCC3	50.3636521	61.32533867	52.65538466	228.425867	209.981157	214.5939997	218.807548	197.0932055	202.4324362	71.13879128	71.25479654	62.98557884	170.1264739	174.4623087	218.4102967
POLR3A	134.2896097	111.8858978	119.994714	183.3699659	155.2068515	153.9746752	218.7693484	193.8178718	194.6241615	132.1306542	133.2302495	128.8571842	154.6860187	156.0004805	160.0158771
NOP14	114.216847	125.0240146	116.9338354	219.028733	187.3468245	191.4838766	218.5401505	214.6981242	207.2494813	161.9832116	161.2191638	152.3354	197.8710419	207.8825479	203.1231725
TMPO	192.3269537	73.02250071	153.9952844	244.4513364	291.6751247	295.9368596	218.0435552	302.8864841	342.2821331	254.739372	275.8152844	261.3414017	246.8864453	219.6130912	178.2965635
STOML2	181.5433971	243.4365897	208.7188303	252.6738286	211.1498833	218.9694102	217.9289563	195.537422	195.6730342	186.7623048	183.8894299	182.5216774	216.8097252	220.9121111	274.6892657
HNRNPD	224.031418	143.5021401	155.8152663	228.8873334	221.8632076	224.9756556	217.4323609	245.486261	243.6492497	275.6582207	267.6675681	292.0736842	195.2976327	210.3231308	150.4364781
CRKL	257.714887	125.871635	178.3168604	219.196539	218.0453684	202.1439678	217.3941613	210.9724321	217.4274315	216.0633986	214.1415987	211.0699397	187.2557289	197.0967463	141.3759632
MID1IP1	144.871227	155.1569211	157.4697953	201.073495	188.0480602	186.2731604	216.9739652	209.5804153	208.1429655	143.454038	140.7367104	132.6792193	168.4778837	171.8642689	168.5175937
NELFE	155.0893537	216.7365459	186.0517833	153.9200194	134.6762263	135.8366096	216.8975659	189.8874714	185.767014	166.7993261	162.8788838	163.9965071	158.586342	163.2435005	214.6982796
RAD23B	178.5950839	57.8924759	117.6783734	273.9851859	334.8400824	328.8319917	216.8593663	281.0236317	284.6329803	169.299294	162.5016747	173.3175928	288.4630877	280.6276622	194.2622284
CEBPB	37.15682433	41.19435328	37.39235486	178.1679811	156.5314079	168.1350948	216.4391702	203.0706895	212.8046221	96.46934797	101.3560817	84.43577596	139.3661921	144.8210365	156.7030016
ATP6AP1	288.8943091	325.0624379	316.8009357	234.0054152	223.1488065	214.2360115	215.4841792	196.0696638	183.0477144	245.9894845	251.8247865	240.3202085	167.4324362	175.9187856	183.086263
COASY	198.5062952	246.4032613	215.2542198	162.8976385	156.7651532	149.5197117	215.4841792	195.4964804	183.2031029	188.0122887	184.8701735	181.8196709	213.9950589	225.8720053	246.1506396
PPP2R4	178.6758596	220.8475051	191.7599083	196.2910251	169.5042698	167.5782244	215.3313806	194.3501136	186.6604982	165.3287568	163.7841856	165.2445186	193.7294615	198.7894086	229.546348
C19orf43	184.4109346	233.8584788	198.5848403	206.5271888	183.4510702	185.7958429	214.9875838	192.0164383	191.7494733	279.5919936	270.8738454	276.4345404	184.3606436	199.7341504	248.6253176
RBBP4	231.1800679	83.4482321	143.1581196	251.9606533	290.0778655	287.5042501	214.2617906	260.2252626	259.3823406	273.6729521	265.1779882	274.9135265	236.3515514	227.8795815	159.4171647
CTDSP2	176.1718127	196.4784175	183.5286267	235.0542025	212.3965246	205.5647433	213.9561935	201.3511393	196.8384484	183.7108734	188.001009	190.7117526	206.6769265	209.4964817	193.6236018
PARK7	217.3674223	240.6394423	220.0523538	262.5324289	198.6055544	206.3602725	213.9561935	196.0696638	197.304614	216.3207483	199.4304443	203.698872	225.7764479	221.6600317	282.2729565
CKAP5	201.6161598	30.980527	93.35679747	329.6967656	495.150372	476.4026569	212.8866035	286.3051073	280.9425022	189.8872646	191.3958908	195.3917957	329.3561683	320.6610936	155.8648042
MYBBP1A	165.9132982	196.7750846	184.0249853	142.8867774	141.2990086	139.3767145	212.1608103	202.0062061	202.1605063	120.8072704	132.211785	132.0552136	218.9408297	235.0438731	207.0347604
YWHAB	220.3561234	99.04444815	147.1703524	234.6346876	266.0800189	269.5252904	211.7788139	268.8639553	266.8409911	234.7028649	222.1384313	231.2721254	217.5334966	196.2307331	178.3763918
EIF2AK1	255.5339429	219.9151226	243.1743962	187.8587754	160.4271622	167.0611304	211.7788139	198.7718141	192.9537346	229.1514657	225.156104	231.1551243	204.8674982	209.8901241	186.3592243
CTNNB1	242.2867273	65.4362978	159.9102255	243.0249857	353.890321	348.0440217	211.7024146	292.7329496	334.357317	262.9745602	263.4051055	271.7544974	268.5593759	246.7744164	149.6381949
CAPZB	181.1799064	228.3065649	195.027603	204.5554687	173.322109	181.9773028	211.7024146	188.0450962	189.2244093	155.2185926	153.674982	159.3944648	181.8274439	185.8385739	225.5948459
DLST	94.1844721	109.5549416	97.94811537	209.2120842	179.7501036	175.4539634	211.3968175	180.716537	181.4938288	144.4834365	145.1123358	129.7151921	187.8588717	190.8378323	216.6939877
CMTR1	120.6789034	158.3778788	141.0899584	148.8858406	124.1576897	127.3642237	211.2822186	179.8977036	182.0765359	153.0495029	155.1838184	143.7943215	163.8135795	162.3774873	186.3592243
ERAL1	164.7824383	196.4784175	181.2536493	204.3876628	176.8282878	188.3813128	211.0148211	197.1341472	190.7394477	165.7331633	173.4407382	158.0684526	209.7730594	221.3057535	247.7072919
FYN	118.0133051	103.0706452	109.1989124	166.2957092	154.3887431	155.8441688	210.7856232	212.4463323	204.7244174	174.0786443	170.1212982	163.6845043	184.8833673	187.1375938	173.1476365
ITPR3	187.6419628	217.5841664	219.7628112	180.7689735	195.7226962	181.1817736	210.709224	197.1750889	183.2807972	159.9244145	174.1197146	165.7905236	188.0599193	186.4684017	154.3879802
PTK7	210.057221	274.2475926	249.9993283	155.765885	156.0639174	140.4109025	210.6710243	192.54868	179.862249	188.6372806	183.5876626	187.9817276	168.4376741	174.6591299	167.6793963
SLC38A1	118.8210621	26.36099561	71.64110466	288.4164987	494.4491362	465.4641305	210.2508283	337.3593713	362.5603392	218.6001307	245.2990693	229.3611078	309.8545517	262.4020194	144.3296113
SEPHS2	119.7499827	116.124	111.0602575	231.7819862	199.2288751	213.4802588	210.2126286	202.7840978	203.0151433	166.5787407	151.5626112	148.4743645	207.4811169	218.9832634	209.5094385
DDX3X	333.1190077	76.45536349	198.9157461	275.9988574	431.3379165	430.4210696	210.05983	334.411571	375.185659	353.3778097	377.624017	402.171696	383.1967139	332.9821005	161.1733878
EIF3A	245.7600826	73.02250071	171.988287	169.2742651	338.5800065	325.2521103	210.05983	335.3941711	370.2132254	315.2165356	342.8453392	351.5102304	287.2165926	253.7418867	122.8158777
VDAC1	472.8609774	442.8816787	460.6208669	268.5734436	221.1230143	218.8500808	209.9834308	199.8772392	195.2068686	333.7089449	324.9656285	334.5840748	272.982423	288.0675034	272.5339009
ACTR1B	120.4365762	162.7855051	146.8394466	123.1276253	109.0032054	114.7153096	209.7924326	194.3501136	188.7582437	198.2695097	194.6398889	190.9847551	188.6228526	194.8923489	216.6540735
GIPC1	155.5336201	201.7760452	175.9177934	227.0414678	211.9679917	209.5423893	209.7160333	190.3378298	185.0677655	156.3950481	156.7680966	155.0264247	163.0898081	172.9271034	230.1450604
CCNB1IP1	161.7129615	167.9559897	142.7031242	236.3546987	151.3890122	172.0331879	209.4486358	188.4954546	181.6880645	156.6156335	148.6958221	150.385382	252.3549398	249.4905489	342.2240285
COX7A2	255.0492887	327.6900612	275.6031642	189.4948836	136.4682733	144.9056424	209.3722365	181.6172538	184.9512241	171.505148	154.7688884	163.8405057	163.2104367	157.8112355	242.1193092
MLST8	187.1169208	218.0927386	197.1784907	150.0185308	154.310828	150.235688	209.2958372	191.2385465	177.3371851	121.542555	126.4782069	122.1491226	167.5530647	176.2730637	208.4716702
POLE3	135.5820209	141.5949941	136.1263715	229.9780721	162.8035724	180.2271385	209.1812383	185.9161293	188.1366894	152.1303971	148.0922876	139.5822828	190.3518619	199.6947861	230.1849746
ANXA5	244.1041807	237.2065795	229.9381644	249.0240489	192.1386023	199.7971567	209.0666394	195.414597	194.5464672	254.0040873	238.3584221	241.8802229	162.5268749	168.9513152	193.8630868
FAM168B	117.6902023	28.48004671	63.20300688	230.733199	329.0354085	316.1830775	208.8374415	249.9079615	266.6079082	179.2256369	166.1228819	167.896543	251.0682352	248.9788138	143.3716714
MOV10	161.3898587	203.259381	180.1782055	151.1512211	149.1684323	139.0585028	208.570044	192.3849133	183.78581	216.6148621	227.6834049	227.0600867	172.6194641	179.776481	188.9137307
PSMB7	171.9310882	251.1923167	210.3319961	228.2161095	175.114156	192.0805235	208.4936447	188.0860379	181.1053575	185.9534916	180.4568272	182.482677	194.4934423	201.8204551	260.1605106
IPO9	194.2251828	173.5079036	170.2096684	199.7310473	263.002373	243.5512623	208.3408462	227.3491006	225.9349547	265.4745281	272.6090072	261.0293989	274.6310132	269.9599534	214.3390521
PDIA4	384.6135196	323.282435	387.1184171	461.4663979	420.1181441	402.8559831	207.8824505	198.8536974	189.1855622	561.353077	515.9843101	558.8751361	292.4840396	305.7814111	257.326605
FBLN1	232.3513156	273.3999722	247.5175348	185.9709584	173.828557	175.3744105	207.7296519	190.7063048	178.152975	227.3500182	236.6232603	236.5371738	152.2332381	156.0004805	168.3978512
WDR1	184.4513225	236.8675313	216.1228475	219.6160539	189.7621921	190.0519241	207.3858551	185.1791792	179.1630006	225.5118066	226.1368477	235.4451637	191.0354237	191.5463886	214.5386229
TXNIP	21.93060392	12.37525839	12.98805246	236.5225047	181.1915327	197.490122	207.3094558	195.168947	187.0489696	37.75686752	34.47691055	29.87427454	163.4114843	175.7613286	184.2836878
DGCR2	103.4332903	123.0744876	115.6515754	204.1359538	195.3720783	185.8356194	207.2330566	179.3245202	179.9010962	150.9171774	154.8820511	155.8064319	139.6074492	137.0662814	154.0287527
IGF2R	159.0473633	90.35633867	115.9824812	193.1446633	245.6662664	228.4759841	206.6218623	218.5056996	219.0201642	183.2329384	189.0194735	191.0237555	176.640416	186.3896732	99.86523434
PDXP	250.8348163	304.3415087	267.2188386	176.406438	164.6532765	155.2443398	206.3124452	182.4974997	175.153199	184.5869651	177.1219217	171.2263936	150.3051917	158.8524196	188.2256105
DDX56	121.6482118	143.5445211	130.8318788	160.8000639	153.4927196	154.8497573	206.2398659	187.3900294	181.8434531	165.2184641	167.1036255	160.4084742	173.8257497	182.7681632	212.103859
ATP5G3	269.1850371	319.3409999	296.8638615	255.0231121	210.2538598	224.6574439	206.2016662	191.2385465	201.5777992	258.1216814	252.5414838	251.2793093	201.8517842	192.3730376	250.6609399
BEX2	79.28095063	103.1541358	81.56703762	222.6063562	177.0682663	195.1878605	206.1959363	194.6231945	202.849266	187.2733276	185.6585405	156.6203693	118.6385872	116.5886104	146.1828258
BCOR	259.8554432	89.72062334	159.7034094	239.8786239	341.2291195	322.2688759	206.1252669	253.6336536	233.3936052	267.2759755	258.7654337	311.3788616	329.0344921	332.7852793	160.4549329
DFFA	157.472237	130.1521182	128.8878072	307.5463785	275.4687868	279.4296288	205.8578695	208.9662902	203.5978504	169.8139932	157.2584684	148.0453605	264.1765383	258.9379663	239.1656611
DYNLL1	108.5625476	123.5406788	119.7465346	234.928348	173.9064721	195.4615226	205.6286716	187.1034377	184.4073642	143.4172738	141.2270822	154.0904161	175.4341304	177.8082691	232.6197385
GPAA1	153.3122882	188.4684043	160.9856694	183.4538689	174.9193682	171.874082	205.4376734	182.3132622	178.2695164	168.6007735	179.4006418	170.509567	157.1790089	170.6439775	197.7746747
DHCR24	249.9200314	338.921032	287.1021405	137.3491806	125.326416	116.226815	205.2848748	173.5108029	170.3835474	223.1588956	229.9089385	246.1312619	162.5670844	170.1716066	189.3128723
UBE2D3	157.3914613	90.48348173	116.6442928	244.3674334	230.9792727	239.2156282	205.2466752	236.9703934	250.5251931	169.3360582	159.9366529	166.3544688	199.9619369	194.5904252	173.6373833
FN1	129.1603524	72.25964232	99.97491337	169.9035374	181.4252779	176.368822	204.5972813	199.7953558	191.943709	172.8286604	178.9479909	174.5266039	156.1737709	159.0315269	96.03347475
TBRG4	196.365739	252.5061284	224.9745775	149.1375495	138.4940655	139.8142556	204.520882	174.5343447	176.1329238	132.2777111	133.6451795	129.5201903	165.7838459	176.5486134	211.3055758
STK25	200.5256878	234.32467	223.3614117	160.3385975	154.2329129	162.4072846	204.4826824	186.3664877	180.3672618	190.2549069	196.7145389	190.9067544	212.7083543	221.8174886	235.932614
TMEM106C	248.0621902	268.4413926	250.9920456	197.2559094	150.0254982	160.2195794	204.4826824	178.0553284	180.406109	223.9309445	221.5726177	214.3849702	191.598357	200.2065213	239.2454895
SSU72	274.677785	322.9010058	288.5912166	199.5632414	164.0112562	166.0667189	204.4444827	189.068638	180.8334275	185.8799632	185.3605454	185.2517025	187.9392908	193.5539648	231.5420561
RPTOR	75.68683564	97.26444523	89.55138082	240.2981388	245.5493938	225.4131967	204.4062831	191.6889049	181.9988416	136.9100045	148.1677294	142.54631	184.2802245	189.3419912	186.5987093
REPIN1	258.2803169	252.6332715	251.1012446	252.881069	257.5424734	261.8026908	204.3260638	198.8946391	195.7118814	240.5116137	238.9242357	249.4462924	258.3051444	261.0553688	243.9952748
TFG	139.4996426	110.9535153	120.5737991	224.4824268	194.7877152	197.0128045	204.2534845	208.2702818	203.9474746	142.2775826	141.302524	138.1782699	192.684014	200.324614	179.3742459
SOX11	382.3517999	68.69963648	169.9201258	150.7736576	264.8723351	251.0690131	204.2152849	340.389055	357.6267526	341.6500193	363.176909	380.5654974	300.1640577	262.4413836	132.3952767
ZNF609	84.00673326	62.38486422	71.47565176	133.363789	134.442481	128.3984117	204.0242866	204.503648	198.703111	135.1085571	142.9245231	139.8552853	141.7385537	141.5144404	102.2600841
POM121	157.2553542	166.8574737	164.5238796	198.4091558	218.6982968	202.1244773	203.876454	201.8158273	190.9398989	236.4179163	254.2868302	262.9848768	225.9356776	230.2768637	174.4935421
NT5DC2	218.9021607	264.9661488	230.1449806	156.8566238	158.0897096	149.2412765	203.7186895	180.2661786	173.6855541	221.6883263	231.1914494	230.5701189	183.073939	185.7598454	206.3961338
GLT25D1	309.6940532	410.0787678	360.0255052	214.749681	199.9301109	189.1370655	203.4130924	182.1085538	174.773274	170.4757494	174.1574355	176.9836265	222.5596864	226.7773828	247.5875494
LLGL1	189.3786405	231.1884744	212.8137895	131.5179234	138.7278108	132.2567282	203.2602938	195.0051803	180.5614975	206.5782265	215.650435	214.3069695	165.4219602	173.3994743	159.3373363
ATXN10	141.9495698	78.5252526	106.2021468	216.4927654	219.8475443	229.3614081	203.243104	219.1460274	225.1727739	202.3198253	186.9919747	188.7742148	166.2060459	168.6915112	143.1629203
ANXA2	162.4803307	154.5212058	148.2871595	161.0937244	130.0013211	141.4450904	203.2220942	182.8045623	195.2068686	274.6655864	254.502971	268.4784673	127.9466887	122.3834201	151.1948472
GAS5	180.0086587	157.7845445	155.6911766	326.5504038	241.3809367	259.5811755	203.2220942	179.0379285	196.0615056	215.4016424	194.6776098	194.1827845	288.3022496	279.6435562	336.3167324
AGPAT1	192.8923837	215.2955912	207.2711175	147.123878	155.0120637	147.5706652	203.1456949	186.325546	175.5890639	167.6081392	177.0996664	173.4345939	164.7786079	170.5258848	165.2446324
HNRNPH1	135.8647359	31.44671824	84.75324679	239.8366724	409.56065	406.5949703	202.4581013	314.7186271	337.5816294	256.2099413	267.9316145	275.2255293	271.0523661	243.7040057	116.6291826
DDX39B	94.76080675	125.3651818	103.6707175	138.9009663	120.6480046	139.3588151	202.1387523	190.3063047	176.3562948	167.1463805	166.557804	142.9140834	174.0718319	183.0374146	200.8253142
RAF1	149.8793207	137.2721299	147.6667111	172.6303843	158.7909454	162.7254963	202.0761049	189.437113	185.4173898	156.2479912	153.7881448	150.9313871	179.0931966	184.382097	169.834761
COX5B	266.0751725	343.6677065	282.0144639	159.2059073	134.7541414	146.0989362	201.7323081	177.7687367	182.8923258	210.5855279	203.0139306	202.8018637	219.1820868	218.4715283	285.1467762
ABCF2	160.6980148	208.5120848	184.8336364	255.851654	222.8379253	223.1499161	201.6589648	183.5505195	178.9244791	149.4995485	151.5263991	148.3378632	220.6477238	226.2310072	250.6310043
GTPBP1	156.7856435	189.739835	174.3459908	190.7953798	186.450801	172.9878229	201.5795096	195.8649554	188.8747851	166.6155049	176.9110618	162.9434975	160.3153514	161.3146528	166.1626581
PEBP1	255.3723915	293.8700058	275.7686171	175.9445521	147.9607485	152.6222756	200.2807218	190.5015965	182.7757844	250.805599	244.6955347	259.6643863	183.1141485	186.6652229	190.5502113
BAP1	217.1250952	287.9790437	250.495687	184.7963166	174.7635381	173.9026815	200.1279232	180.6346537	173.8409426	220.7324562	222.8174077	218.8700114	200.9269653	217.0544157	233.0987085
RBM15B	121.5270483	130.6183095	126.5301034	159.4576162	153.7264648	147.0933477	199.9751246	187.2262628	188.4863137	197.9018674	210.2186242	203.0358659	169.5233312	177.2571697	157.2218857
ARF3	225.9102609	303.8325126	260.4927647	215.7095311	178.8151225	179.7124312	199.8544138	184.7611647	176.0198786	200.9452106	201.3734483	209.1487821	196.4962784	200.2840688	227.4752021
PABPN1	124.2653447	114.2015968	119.1773767	215.8769175	207.7196716	208.5921297	199.3306967	205.0977117	213.8142592	173.3102718	167.2405524	173.7068164	187.6280691	186.1570306	182.3865677
ABCA3	178.9989624	221.4832204	212.1106147	191.4246522	197.8653611	179.7895975	199.3257307	179.4064035	170.7331716	111.2118055	113.9548652	110.0980118	238.0805607	241.1846944	234.1364767
TMSB10	453.2728689	537.1794524	483.866999	118.8905247	106.1203472	107.913535	199.1729321	187.8813295	167.5865534	326.9810902	315.6108431	323.1959702	174.5897305	187.8461501	208.1124428
PSMA7	154.4835359	194.9103197	169.4237671	239.7527695	192.4113051	207.6728957	198.4089393	183.459629	185.8447083	198.2695097	185.5868708	182.7556795	177.0425112	180.5637658	227.7901249
PLCXD1	200.8487906	218.1351197	213.7651437	106.8084954	118.7815487	113.0049218	198.33254	200.2866559	181.3772874	264.0774872	263.7445936	262.8234153	194.3326042	205.7175148	169.8746752
KDM1A	204.9279637	166.9812262	169.3410407	188.7817082	162.2192092	166.2258248	198.2561407	196.1924888	183.2031029	189.8872646	185.1719408	190.7897534	191.4375189	196.0339119	178.0171643
GLUD1	236.4135258	137.4352968	189.1432707	155.8363635	151.7150869	143.6713789	198.0047871	199.9472494	198.099038	170.4842052	148.2510926	161.6326954	173.8635466	173.2656359	150.3043622
EIF1AX	108.2394448	67.00439561	104.8971371	264.6719549	287.5066676	296.2152948	197.4157486	258.9560708	291.7420065	229.4455795	237.0759112	235.0941605	195.0563756	176.7454346	136.1871221
TPX2	250.1623586	146.9773839	170.6646639	169.7776829	150.1813284	155.7248394	197.4157486	190.7881882	191.0502248	237.5337108	234.6994939	229.5561096	186.6123766	183.1224414	156.1841175
MAF1	158.7646483	204.2341445	172.8569148	196.9202974	177.6853538	179.5111623	197.3011497	169.4575774	163.7795339	163.9684802	161.1060011	157.4444469	193.6892519	200.4033425	264.2716693
IRF2BP2	181.9068878	90.2291956	117.6370102	208.6667148	226.9276882	226.6860434	197.1101515	227.9632257	217.000113	170.6963348	167.3676719	177.8806347	274.5505942	274.8804833	179.8133016
ABL1	111.187758	141.8068992	129.7150717	171.0781792	166.5045389	161.6117554	196.1169608	175.8444781	183.0088672	146.9834044	150.5441466	148.9423688	172.7400927	180.2488519	178.0570785
NDST1	77.26196189	90.90729195	88.02094152	204.0100994	184.1912635	181.3806559	195.8113637	188.3726296	177.9975864	164.9978787	172.1582273	169.6125587	169.7243787	170.0535139	158.9781089
SNU13	140.0650726	155.5383503	147.9562537	186.4743762	176.2049672	170.6012353	195.7349644	175.7625948	175.6667581	113.0132529	114.5961206	117.7030817	156.7769137	151.9065996	183.5652329
CEBPG	78.63514887	21.57194014	51.57994082	237.9908069	330.8274555	324.1781459	195.6967647	289.3757326	322.4312456	177.7918318	180.6077109	162.7484957	256.2552631	228.5094093	161.2532161
EIF2S3	399.8409517	139.5835908	233.3142308	200.7664101	290.3809551	275.6878573	195.6367913	255.5239305	261.4237577	378.699543	359.8955671	377.694291	244.9113537	241.8739622	156.4770874
KDELR2	215.267254	139.9328105	158.9588714	249.5694183	227.2393485	219.5660571	195.4293673	202.0008837	191.5552376	233.5264094	218.140015	222.6530462	208.8482405	208.0793691	173.3072932
TOMM40	167.4884244	204.2341445	180.7159274	193.1027118	170.8288262	173.0275994	195.4293673	175.6397698	172.8697642	157.0568043	155.5610275	162.241491	201.4496891	220.3610118	260.8789655
CCNI	366.6005374	251.9551751	292.2725436	172.5464813	147.4543004	148.0877592	194.5125759	201.269256	183.2419501	267.6068536	270.6475199	257.7143684	186.3711195	191.3889316	150.157079
NUDC	243.1348722	290.2252379	249.6270592	155.6819821	137.7538722	142.4792784	194.4743762	179.5292286	176.482548	263.4524952	263.4428264	256.5443576	195.2172136	205.4813293	217.252786
MRPS34	260.0977703	313.7890861	282.8417284	202.9613121	183.723773	187.2277954	194.2069787	170.8905359	161.4098585	149.0789657	145.1877776	149.8003767	200.6857082	210.362495	251.9381931
GORASP2	113.3283142	103.4520744	119.5810817	228.2161095	194.0475219	201.2291092	193.7867827	184.1146957	192.0990975	113.5647164	113.6908188	121.3691154	183.7172913	193.1603224	202.9635158
ARIH2	212.0362258	198.1736583	204.1688756	182.4050816	157.9338795	171.1978822	193.7867827	184.6059958	184.6792942	192.791639	187.7746835	178.6996422	215.0002969	209.6933029	209.8287518
JTB	206.5434778	245.1318306	217.2396545	201.6608159	167.0889021	170.402353	193.7103834	183.7462207	171.8985857	182.7182391	175.6285509	169.1835548	196.6647563	204.0642167	264.8304676
SPECC1L	52.78692325	13.68907007	28.08562937	183.6057333	262.1040121	258.497267	193.6339841	226.9126624	237.6687328	123.1013585	118.4436533	118.6390903	153.9839605	157.9694797	104.4952772
SLC29A1	252.6664054	291.4542875	274.8999893	130.2593787	120.378808	119.9260258	193.6339841	181.4125454	163.9349225	147.0201686	148.8089848	153.0764068	179.7365489	177.3358982	186.6386234
PI4KB	189.5805798	228.9846613	217.7773765	155.9756425	137.1305515	142.4792784	193.5193852	172.3644361	173.3359299	187.6078821	189.3212408	187.5527236	158.5461325	161.354017	173.8261773
CDC34	180.8568036	224.3651299	200.5702751	218.7350726	195.1383331	193.2340408	193.3665866	180.1433536	169.8785346	172.1669042	177.6277591	169.7685602	179.2540347	181.6659645	226.3133008
STK40	123.2637259	152.8259649	137.7809005	208.9184238	196.3460169	195.0239815	193.1755884	182.3951455	186.038944	169.5934078	175.2513418	148.5913656	179.7365489	175.7613286	194.6613701
TOMM20	415.5910025	140.4507065	235.2740204	225.3634081	281.6630362	286.9871562	192.9081909	264.2375464	267.9675581	369.7011292	342.0532001	354.5522583	322.6411786	326.487001	202.6841167
WBP11	172.3753546	118.20067	150.5621368	184.0411898	172.9714911	172.2718466	192.793592	201.3511393	190.4286706	223.6000664	212.6327623	222.0680408	202.5755556	202.0172763	158.6188814
SNRPC	154.6450873	158.8864511	153.912558	153.5005045	137.2863817	149.4401588	192.6025938	176.1310698	176.9487137	175.1448071	162.6525583	161.3444828	165.6230078	164.2669707	195.0205975
KMT2D	124.1086398	104.2183233	112.5770469	154.6050873	235.8992208	202.2191453	192.4891408	209.4633221	206.6147191	223.3971279	229.6501731	234.166342	263.334551	262.9373731	115.2800839
SNRNP70	574.3960387	647.2429663	606.4262329	167.3444965	223.6942121	233.1696063	192.3733959	216.0082577	219.9913426	445.0678073	453.2921599	460.0092275	215.4426016	222.5654092	187.1175934
COPS3	106.3816036	75.01440874	87.52458283	200.3603197	161.7517187	179.4713858	192.3733959	194.4729386	195.6341871	137.2776468	121.876256	126.4781623	185.5669291	190.0505475	195.8587949
NGRN	113.974116	60.59384223	83.41721464	204.5101611	216.4878458	200.1153684	192.0085893	204.8889092	207.1100201	221.3923742	207.1334311	198.6120552	198.336266	197.2530224	180.4100184
CLTC	286.2287109	55.26485254	152.3407555	254.3099367	413.7291071	391.0423745	191.9150002	293.8383748	310.6994099	322.4958538	331.6799502	337.431101	320.6307027	279.3286423	175.6622288
ADSL	118.3953742	170.9968281	137.9852348	148.0199618	109.3234364	123.3336751	191.7801555	164.1896126	168.9380454	184.5104955	184.6736476	186.3308424	150.3876212	153.2516756	183.3724475
NDUFB10	283.8458276	343.2438963	294.5475209	172.9659962	153.1421017	159.3444972	191.4566045	179.5701702	164.7118652	173.7477662	170.5739491	180.9226627	168.115998	178.6742823	213.2613697
OS9	256.7859664	314.9333737	296.7397718	166.0020488	154.4666581	154.8497573	191.2274067	174.7799947	172.5978342	270.4376996	260.1233864	264.305429	194.2119757	212.0551573	222.6811121
PBX2	142.8360831	152.3610451	153.2921096	126.6708482	119.6775722	124.7389774	191.1510074	187.7838883	175.3396652	123.2587094	119.8393269	126.9067763	154.4278736	159.7400832	138.6618002
DVL1	218.9425486	286.2838029	241.6853202	198.1368907	193.1904559	200.1949213	191.1510074	176.3767199	167.5865534	175.8800917	176.4961318	176.5546225	189.1053668	203.1588392	216.5343311
POLRMT	222.658231	282.0033196	247.1452658	148.8438891	142.0392019	143.3543605	191.1510074	170.3173525	166.4211393	173.8948231	180.3059436	185.9537089	206.1944123	212.8818063	217.4523568
PELP1	171.6079854	193.4269839	179.8886629	170.5328098	162.1023366	163.6005784	190.6926117	184.0328124	179.5903191	189.5563865	192.7538435	194.7287896	203.8220507	210.9529586	191.1090096
RCN1	144.8304353	62.39164518	100.8352684	365.9772538	389.6221794	406.9155685	190.6356942	248.6576028	246.5115068	217.6449959	197.5206347	194.7135794	246.1240728	244.6955909	180.1382029
LARP6	68.45741004	86.11823648	82.47826945	132.6086622	103.4712343	108.4306289	190.234216	168.4340356	169.6066046	164.8508218	157.8620029	139.4652817	119.8645755	114.4318437	142.6532164
ERGIC1	197.8600895	230.7646642	219.9696273	201.325204	185.3599898	185.4378548	190.0814174	170.9724193	159.9725144	189.6299149	190.1133799	188.4887322	212.5475162	218.1959786	210.5871209
E2F1	191.3576453	226.9079912	212.7724263	159.7512767	156.2587051	150.235688	189.8904192	174.984703	175.3171339	175.2550998	177.5523173	167.896543	147.2070482	154.8195533	162.3708127
EIF4EBP2	221.3254319	144.4769036	159.5379565	162.855687	167.1278596	159.1058385	189.3938239	208.4340485	203.0151433	165.5861064	158.0883284	152.2573992	161.1195417	162.8104939	125.33047
ADIPOR2	156.3413771	123.7525839	130.7491523	215.2111474	201.877988	194.7853228	189.3556242	182.7226789	180.8722746	176.7256691	167.3676719	168.6375498	164.2156747	170.3290636	154.0287527
DIAPH1	179.1605138	118.6668613	138.9390708	295.6741066	280.4163948	269.3264081	189.2028256	186.9396711	185.1066127	169.9242859	167.2545092	172.7325874	186.9340528	194.3412496	161.213302
PSMC4	111.5916365	140.2811825	127.9778163	189.9983015	158.3624124	159.9013677	189.164626	170.8086526	165.4499608	175.9903844	185.3982663	164.6985136	175.9166446	179.5009314	210.3077217
MSN	214.2575577	215.7617824	217.7360132	153.2487956	136.7020185	134.1262218	189.1264264	178.3419201	176.8710194	282.5698965	295.9582497	289.4606601	166.5076172	171.9036332	150.8356197
FBXO7	121.3654968	134.4326014	134.2650264	166.4635152	131.715453	142.359949	189.0882267	173.5108029	169.5677575	168.7845947	165.3307428	170.8605702	139.9693349	142.4198179	161.8918427
ATXN7L3B	168.5788965	115.9968569	126.6541931	183.3280144	150.8436066	158.4694151	189.0500271	194.2272885	197.9261682	213.2693169	211.1616469	210.1729315	175.5949685	182.5319778	158.020169
MLEC	177.3834483	97.05254012	125.5787493	234.928348	226.771858	220.679798	189.0500271	192.30303	188.1755366	204.0414944	194.9039353	210.7579369	200.4444511	212.1338858	157.5012849
NEO1	192.2057902	121.0825795	149.0316975	155.1366127	151.7785877	142.8372665	188.7826296	188.6592213	179.7845548	139.8143789	143.9052667	149.4883738	185.9690243	196.3488258	126.2085815
RAB7A	252.9087325	206.5227197	219.6387216	191.4246522	189.3336592	194.2682288	188.7444299	194.9642386	190.6617534	245.8424275	231.4177749	229.4781089	187.336148	192.2549449	175.5824004
VPS25	141.1959324	188.3412613	160.5720371	191.3827007	162.5308696	173.0275994	188.5916314	170.0307608	159.7005844	169.6301721	171.8187391	159.5504663	165.5023793	162.1413018	202.2051468
TRIM27	100.0810986	117.7344788	105.9312177	132.6925651	116.288266	118.732732	188.2860342	171.8321944	171.0827959	119.961693	122.8569996	124.1381408	150.8259049	155.3312884	168.6373362
DCTPP1	191.3980331	249.2004087	215.2128565	133.8252554	106.6657528	119.2100495	188.209635	169.4575774	172.1316686	108.4177238	105.8071489	110.878019	162.0845702	168.8332225	208.0725286
SNHG15	50.16171284	39.62625547	47.15407581	197.0461519	156.8430683	183.727467	188.1714353	176.1720115	179.1241534	129.6020102	124.2903942	114.7780548	207.8430025	205.1270512	248.5854035
BLMH	174.3543594	142.9088058	145.3917338	186.8519397	149.9086256	157.2761213	187.9422375	189.314288	179.6291662	185.8431989	174.8741327	174.7996064	190.7941666	192.5304946	166.3622289
GSK3A	152.3025919	187.3156405	170.0028523	224.3112648	203.3194171	206.9577149	187.5411412	170.5220609	165.9938208	186.1373128	182.7370562	196.7568082	160.4379904	159.1889839	204.6846145
RASL10B	147.8195403	199.0636598	168.5551394	171.4137911	159.764884	147.5308887	187.4456421	166.2231854	156.7482019	122.9763601	130.9292741	124.3331426	190.3518619	194.6167993	230.7437729
MCM6	129.6046188	58.61295327	87.23504026	159.3317618	177.9580566	175.9710574	187.2546439	209.6213569	213.892342	191.3578339	181.9656636	182.7556795	150.2629717	151.473593	110.3626591
TADA3	146.6886804	194.7407956	168.0174175	151.654639	132.8452218	132.5749399	187.2546439	166.8782521	166.1880565	153.4171452	161.2568847	158.1464534	152.7961713	156.6696726	187.7961341
SERF2	306.7699727	349.3043824	316.704973	165.2506976	149.6016402	156.5589518	187.0254461	176.4569655	170.8885602	189.3012427	184.9591949	179.8037424	169.3914439	182.3977457	210.7946745
RCC1	143.4580561	170.5594559	157.7188019	234.2281776	210.3189189	210.9087107	187.0212441	170.8692462	181.1535279	131.3166941	120.3576122	132.6331989	189.7426877	197.9903146	222.988052
SMPD4	186.511103	206.7770058	202.5143467	142.341408	136.8188911	136.9503505	186.9108471	173.6745696	167.5477063	242.9748173	247.4114402	242.7382308	195.9007755	195.0104417	183.2459196
ATP6V0C	183.1613345	221.0144863	199.3450964	216.5259071	219.0333317	202.721522	186.6426857	171.2180693	167.4529193	140.0412142	147.3921875	147.8179884	148.1612201	149.6998403	183.5931728
CDV3	179.5643923	52.67961021	98.94083276	226.3282924	288.1689458	284.9585567	186.4142518	240.9826771	262.878583	211.9458045	189.245799	194.338786	250.4248829	239.6888533	147.3231734
CD99	253.9992046	305.1857386	267.6200619	157.989314	131.3648351	130.5861169	186.2996529	175.0665864	164.1291581	226.3573839	225.3069877	224.6420645	144.2315438	148.9149174	180.0128725
MYC	606.5851571	575.3647532	642.0813323	138.2721134	136.4682733	138.899397	186.2614532	192.1392633	167.8196363	179.2256369	167.329951	204.1668763	327.9890446	341.9177829	284.0291797
UBXN6	203.756716	272.3828277	226.2982007	184.2509472	161.4790159	161.8901907	186.1086547	161.7605432	155.5439406	159.7038291	162.9166047	163.7235046	172.8607212	182.9649844	242.1193092
PPA1	264.6615976	152.1054876	225.8432052	209.8833081	192.6450503	212.0085298	185.8794568	207.0829733	219.8359541	186.9461259	183.0972908	183.6526878	192.5231759	189.0270773	182.8068638
LARS	147.1733346	32.88767299	70.6897505	261.3158357	409.2100321	408.9020049	185.8412572	256.3767455	293.8785991	166.3581553	161.5963729	153.6614121	239.3672653	221.6206675	172.5888382
NADK	127.5448383	149.5202452	140.8004159	178.7972534	170.672996	166.3849306	185.5738597	183.5415123	178.0752807	154.7774219	154.4294002	146.4073455	175.3537114	176.5092492	174.2652331
PSMB1	168.9019993	181.7722029	160.4065842	177.4128543	134.9878866	143.831678	185.3828615	172.1597277	179.007612	169.9242859	154.127633	161.8514874	150.5042288	147.1435266	189.7120139
2-Sep	293.9427907	82.51584962	182.0395506	221.8394829	298.5706098	311.6485611	184.9244658	254.0021286	280.5151837	283.3419454	271.7414263	271.6764967	305.2706665	266.5746288	192.4660911
DESI1	89.94374758	116.2935241	102.0017114	180.2236041	148.1944937	154.7702044	184.8098668	161.5148932	158.6128645	102.6457391	102.1104999	97.50089603	128.3889934	130.1381752	153.2703836
GABARAP	237.4805729	291.7509547	248.8622532	212.1906401	174.1012598	174.6409326	184.7716672	167.1239022	161.7594827	185.4755566	191.1695653	176.7909647	168.5180932	163.4009575	224.0381936
MKNK2	135.4204695	153.5464423	144.5644693	180.0977497	182.3992165	180.5851267	184.6570683	184.9744708	172.0539743	294.6653292	308.2929868	277.6825519	157.2192184	162.1413018	156.30386
ARMC6	115.307319	145.8754773	128.5155382	118.9744277	112.8989597	116.2665915	184.580669	156.806601	163.7018396	130.1086214	125.5729051	137.3592623	141.1756204	153.2056195	178.8154476
NCAPH2	120.1134734	148.5878627	131.7005065	151.9902509	147.6490881	142.0019609	184.1986726	166.2641271	165.4499608	191.2475412	198.9777934	177.2956293	122.7998703	126.477301	152.3922721
CYCS	158.1588305	127.5244949	178.606403	277.928626	242.4327903	266.3829501	184.1604729	200.7370143	223.5264322	176.5786121	158.5032584	151.1653892	217.8551727	207.725091	199.0120138
KCTD15	92.89206082	81.41394305	86.82140801	133.6154979	138.7278108	143.2748076	184.0840736	191.4841966	186.6604982	120.5499207	121.2727215	116.8060734	174.8309876	178.2412757	144.4892679
ADRM1	133.360689	162.2345518	147.6253479	199.017872	194.3591822	197.2116868	183.6638776	171.0952443	166.5765278	146.5789978	145.414103	154.8314229	178.9323585	184.1459116	221.443773
GAA	195.1541034	234.5365751	209.7529109	175.5669887	182.1265137	179.1929506	183.5492787	177.0727283	164.6341709	122.6087178	129.6467632	125.0351491	198.2329276	206.8984419	206.6356188
SNHG5	262.1979386	256.1932773	249.7511489	167.8059629	121.2748315	125.4947301	183.511079	170.6448859	191.1667662	195.8063061	170.3853446	180.7666612	190.9550047	175.9975141	249.7429142
UBL7	131.5836235	162.5312189	141.75177	126.1481326	111.769191	113.4424628	183.4346797	166.018477	160.3221386	108.1971384	112.5591916	119.5750989	142.9046297	144.2699372	189.9115847
SNX17	157.1087463	208.5146277	175.6282508	159.7932282	129.2611278	139.5755968	183.2436815	164.2989268	157.2920619	176.0271487	179.4760836	169.2225552	161.762894	162.9285866	212.5429148
PKD1	78.3750511	88.03979201	87.41869297	173.2600762	228.1361512	206.8662291	183.1053988	176.8156146	178.7481131	127.0976307	132.9699753	125.2516011	159.4781892	167.2633766	109.1560539
MCM4	181.6241728	72.13249925	130.5836994	186.4743762	232.5765319	229.510172	182.8998848	222.9683418	232.2670382	216.1369271	210.8221587	218.285006	188.8641097	184.539554	135.1892681
RNPS1	422.3761617	475.8964948	449.949155	157.1922357	148.3503239	143.6725722	182.6706869	180.4299453	167.7030948	211.0634629	208.1439742	223.7450562	167.9149504	179.933938	165.7236023
BANF1	195.5983698	260.9823328	219.6387216	281.3686483	227.3951787	232.2149713	182.6706869	167.2057855	168.7131204	161.2111627	156.164562	157.0934437	175.1928733	181.1542294	226.3133008
GDI2	147.6579888	69.67439998	110.3984459	110.709984	101.4454421	105.4871709	182.5178883	186.9396711	183.78581	224.3353511	195.1679816	210.2899326	144.2717534	152.3396062	134.3510707
NDUFV1	221.8504739	272.8913999	228.6145412	267.0631899	248.5880821	245.1423207	182.5178883	170.1126442	168.7519676	176.1374414	180.3813854	170.1585638	209.2101262	214.810654	251.6987081
KIF22	235.9054466	289.2928554	267.1650664	120.3588269	105.3801539	110.0216873	182.4032894	160.4913514	159.0013359	132.0203615	134.5127604	136.5012544	160.596818	160.9210104	175.1034305
EMC10	189.0959255	252.6756525	210.5388122	241.4727806	220.5386511	225.3734202	182.3268901	166.5916604	173.7244012	200.0709572	197.4689571	206.311896	117.8540995	126.6741222	155.5854051
STRAP	181.2606821	72.76821458	128.101906	193.5641782	190.3075977	197.8878866	182.2504908	218.3009913	224.2256807	170.1448713	162.3507911	170.1585638	232.4914376	235.1619658	163.4085809
ZNF282	146.0828626	194.8679386	176.9105108	143.2643408	141.4158812	134.0864454	182.2122912	156.1924759	154.3785265	172.5345465	183.5499417	175.735615	169.201655	175.0134081	196.617164
TMED3	215.1460904	277.8923605	241.8094098	143.0126319	129.1442552	138.1834207	182.2122912	155.1689341	154.2619851	170.1816356	173.51618	168.6765501	173.1823974	181.9808784	233.0188801
ASXL1	147.5368253	119.5992438	128.3914485	173.4274626	170.2444631	165.3905191	182.0594926	179.8158203	181.7269117	187.4608252	182.9464072	188.5277326	201.4898986	209.2209321	155.5854051
EIF4A2	244.4676714	106.3763649	174.8009863	193.7319841	201.7221578	209.0252953	181.6774962	210.1945403	234.0151594	142.7187534	126.7799741	135.0972415	202.3342985	180.6031301	156.2639458
BRPF3	55.21019441	53.0610394	57.08124967	124.8476364	132.9620944	127.4437766	181.6774962	182.8045623	185.5339312	108.7853661	110.4090998	108.6939989	104.8262154	106.0078965	92.32145765
DDX24	130.2912123	128.2025912	128.3087221	146.4526541	129.923406	134.3648806	181.6774962	174.4524613	172.8309171	128.8586374	128.892345	130.4171985	152.0724	160.4880038	165.643774
RTCB	131.5432357	150.3254846	135.2163806	160.8839669	131.6764955	135.6377273	181.0281023	161.2692432	168.596579	184.8138004	179.6269672	179.1286462	142.2612774	144.5454868	165.5639457
ANKRD11	80.7353172	48.52627006	55.46808392	168.4771867	310.9980661	291.641002	180.9899027	254.4934287	251.4575244	156.0274058	166.2360446	157.4054466	216.8097252	213.0786275	117.7068649
JUP	346.729714	379.0982408	382.3616463	180.6850705	190.6971732	175.5732928	180.8371041	170.3173525	152.1642396	207.6443892	218.4040614	219.2210146	162.1649892	160.4092753	152.5519287
AKAP8L	132.5933199	149.138816	142.4549448	170.0713434	158.4403275	158.2307564	180.7225052	178.3828618	172.3259043	151.652462	152.052983	137.2032609	151.8713524	152.4183347	161.8918427
SDF4	197.9408652	253.4385109	223.4441382	200.1925137	192.9177531	194.2682288	180.6461059	161.6786599	163.0025911	214.5193008	221.459455	221.8340387	167.1509695	170.4865206	196.0583657
AKT2	197.456211	239.3256306	216.6605694	173.4274626	174.25709	168.7317417	180.5697066	168.0655606	163.4687568	249.3350297	254.088041	252.6053214	189.3868334	203.119475	196.6969923
EIF2D	123.1021745	154.6483489	141.2554113	161.6390937	129.5338306	147.9286533	180.4551077	158.2395595	158.6905588	143.7113877	142.4341513	129.4811899	170.9306643	170.8014345	213.3411981
PSMA6	78.43603676	67.97915911	79.73712857	208.2052484	155.1854248	173.4901996	179.786232	172.1523582	175.9612194	101.7369273	96.07817214	90.59159254	146.2279465	139.8418539	187.3902071
CHAC1	7.18903775	8.010013137	8.148555206	149.3892585	148.8957295	143.2748076	179.6911148	164.0942185	161.7594827	55.18311406	56.12871215	48.32144407	102.9765776	101.7171944	130.3197403
CASC3	170.5982891	195.8427021	175.1732553	157.3600417	141.7275416	140.9677729	179.461917	170.1126442	165.216878	231.724962	230.7765194	226.8260845	184.6019007	191.940031	177.0193103
NOTCH3	152.0602648	177.0679094	171.3264755	166.4215637	186.6845462	154.650875	179.2709188	168.884394	167.8196363	167.5346108	174.0819937	182.1706741	188.6228526	201.151263	150.3566498
DYNLT1	97.09239748	116.2935241	106.5930293	201.8705733	155.7522571	167.975989	179.2327191	156.929426	162.6529669	110.2191712	102.4122671	100.2309211	129.595279	128.6029699	178.3364776
KIAA0319L	137.0763715	166.3878919	142.7858506	191.2568462	158.8688605	153.0200402	178.8125231	167.0010771	158.8847945	143.6746234	138.6243395	133.5762276	161.6422655	159.543262	174.9038597
HSF1	149.5158301	181.984108	169.2996775	122.8759163	127.624911	114.317545	178.5833252	167.3695522	159.6617373	134.2997439	139.6805249	142.3903086	176.2383208	174.8953154	196.617164
PSMC5	110.8242673	122.2268671	111.1843472	197.1720064	182.6329618	186.9891367	178.2395285	167.2876688	171.121643	179.8138647	176.2320855	168.7935512	173.1019783	175.4070505	185.2815419
FLAD1	84.77410246	109.9363708	99.27173856	145.0263034	121.3917041	130.1485759	178.0485303	154.5548091	154.6504565	69.48440078	71.02847108	66.22260859	145.7595056	153.6779904	187.27725
RBFOX2	110.6627159	28.01385547	58.11533028	159.1220043	207.1762139	200.7120153	177.8957317	212.610099	207.4825642	141.7996475	129.5713214	134.2392337	156.6964947	156.1973017	104.4952772
AKIRIN2	67.20538661	52.34056203	59.93531215	138.8174828	128.053444	129.1541644	177.6665338	179.2835785	176.6379366	95.03554287	98.22524626	91.37783976	125.6547462	125.4538308	117.0283242
CPSF7	84.97604172	93.53491531	93.56361359	298.0653416	267.4824905	272.0312074	177.5901346	168.4749773	168.0138719	131.9100688	133.9846677	131.6262096	171.7348547	172.6515537	168.1184521
YKT6	122.9810109	157.2759722	138.8563443	219.3223935	186.3339283	183.1308201	177.4755356	156.1105926	158.4963231	142.7187534	144.8860103	145.159334	169.8852168	171.8249047	203.0832583
IPO5	249.7988679	91.5853883	176.951874	157.3600417	190.11281	182.8523849	177.2845374	198.6080474	203.3647675	270.7318134	251.1080892	270.4284852	170.6894072	164.3456992	136.6261779
CSK	187.9246778	231.6122846	207.3538439	93.71963027	86.01825503	82.4566008	177.2463378	167.2057855	155.8547177	183.6741092	190.452868	193.7147802	158.8275992	157.1420434	164.8454907
USP19	121.9309268	153.3769182	141.4622274	148.7180346	139.3511314	143.4339134	177.0935392	167.7789689	162.1479541	165.6963991	171.3660882	167.2335369	144.8346866	149.4266525	159.2175938
APEH	205.7357208	282.4695109	234.7362985	121.7851776	104.523088	104.890524	177.0553396	153.6540923	146.1040861	135.733549	142.2455467	131.8212114	169.0810264	175.485779	210.6669492
PSMB3	269.3465885	307.6014569	286.812598	176.5318729	153.1421017	164.1176724	176.902541	177.11367	166.5765278	221.7618548	216.3671323	222.7700473	175.9166446	183.9097262	206.3163055
SF3A2	171.446434	203.9374773	197.0130378	142.2994565	154.1160403	143.1157017	176.902541	166.141302	162.8472026	143.0496315	148.3940548	147.6943573	144.9553152	159.700719	160.9339028
ZNF512B	41.31677314	44.24578685	42.48003146	173.5533171	190.6971732	180.6249031	176.8643414	177.8915617	181.8434531	105.5501136	108.3344498	101.3619315	129.3540219	133.7990495	115.5515002
CDT1	294.14473	336.7172189	311.1341739	161.2195788	159.9207142	154.213334	176.8261417	168.7206273	155.349705	181.762369	189.2835199	187.3187215	148.9762671	161.7476594	164.7656624
PEF1	147.4964374	179.9922	163.4674628	150.5639002	129.4559155	134.2455512	176.7879421	158.5261512	148.5903029	129.0424586	132.8530404	129.2081874	165.1404936	169.1087722	210.38755
APEX1	115.8323611	145.5364292	126.1578344	108.7382639	85.66763714	95.70216185	176.7497424	162.0471349	160.7494571	86.61653346	87.05985728	93.71786127	131.1634502	134.5863343	159.0978514
AGBL5	200.3641364	268.0175824	237.96263	143.3482438	122.2487701	126.0118241	176.4441453	160.2047597	147.3471945	185.7329062	194.3758425	188.2937304	172.9813498	173.3994743	215.9356186
ETFA	169.3462657	112.7758992	143.9026577	156.7307693	140.0134097	145.3829599	176.4059457	178.8741618	188.4474665	152.5348036	146.5834512	144.7303301	183.4760342	176.8635273	178.176821
KHDRBS1	186.228388	63.74105692	115.6515754	199.0598235	247.8089313	242.5966272	176.2531471	217.6459245	228.6542544	268.930366	262.9524546	271.2864931	209.1297071	197.6084815	123.614161
ADD1	147.4964374	172.363616	161.5647545	175.5669887	152.947314	160.2991323	176.2531471	167.2057855	161.3710113	210.4384709	219.7620141	223.1600508	158.5461325	167.2980172	158.3394823
KIAA1967	132.1894413	174.1012379	157.7179746	154.9688067	139.0005136	134.921751	175.9093503	163.1935017	158.3797817	173.3433596	173.7802264	178.6606419	157.8625707	160.369911	177.0991386
HMGN1	286.1479352	212.964635	263.4423762	212.526252	183.4900277	190.5292416	175.6419528	195.4555387	200.3735379	288.1212957	274.759099	276.3955401	193.2871567	193.5146006	163.6480659
SLC25A39	240.5500497	298.7014423	260.8364931	149.3053555	148.1944937	151.1505466	175.298156	161.8014849	155.8935649	182.6079464	190.3774262	180.3376573	174.5897305	181.4297791	204.2008549
TMEM9	181.0991307	232.375143	214.5096817	194.319305	171.8417223	175.6130692	175.0307586	166.5097771	158.0690046	166.2478626	168.2729737	160.4084742	170.4883596	172.4940968	201.8060051
AGRN	216.1961746	253.608035	230.2690702	161.8908027	185.1262445	162.6304306	174.9543593	166.6326021	149.2118571	230.4014496	238.8865148	241.4512189	252.2186296	269.3301255	222.2021421
DHX9	127.4640626	42.08435474	82.80917524	217.4345764	288.1299883	289.3339673	173.9229689	226.2846172	251.612913	267.0921543	239.3014448	272.1835014	155.6510472	148.5606392	123.0154485
GALNT2	192.4481173	197.453181	200.2807325	159.2478588	137.8317873	142.5190548	173.6555714	161.0645348	157.1366733	197.5709893	192.7161226	199.7598358	172.8607212	180.091395	153.5896969
DHFR	219.1041	99.51063939	148.7835182	361.7477045	437.8827837	435.910221	173.6173718	222.2313917	246.4462436	164.0052444	163.0297674	160.6405263	236.3917609	221.541939	230.9034295
RRP7A	83.84518185	106.8849372	87.93821507	174.7699103	159.2973935	157.6738859	173.3117747	157.4616677	158.1078518	146.6525263	153.4863775	147.1873527	137.1948781	141.947447	169.7948469
CLPP	188.1266171	245.4708788	217.2810178	176.0704065	167.945968	167.3793421	173.1207765	163.6848018	154.0677494	158.1229671	161.4454892	157.9904519	172.8205117	191.3495674	221.2442022
HGS	109.4510804	150.7492949	133.0241297	195.0744318	203.0077568	199.9562625	173.0443772	155.8649426	158.9236416	133.2335812	144.621964	138.7632752	163.4114843	175.0921366	207.9927003
COPS6	180.3317615	214.7022569	193.0835315	173.4274626	159.4921812	163.4016961	172.6623808	163.7257434	155.349705	207.9385031	209.049276	198.9018279	179.2138252	185.2087461	200.6085803
TARS	113.368702	52.97627736	94.63905742	252.6318771	308.7774861	314.3931369	172.5477818	228.2498174	237.5114019	159.2994225	147.5264739	147.9673598	277.9281938	261.6540989	221.0845456
RAVER1	133.6373458	160.8359781	142.3271325	193.996698	200.943007	181.738644	172.5095822	163.6897148	163.7795339	142.0165565	153.2223311	166.4925301	171.5265694	171.3918981	166.1846109
NOMO3	160.4920367	217.6549427	188.7540428	193.0603408	149.8946009	148.0825882	172.5046162	145.8477438	149.6088749	100.4141502	107.2710974	98.05704114	132.6564297	141.8065231	158.6723664
ITM2C	240.7923768	281.2828423	271.1772992	167.386448	152.2460782	150.235688	172.4331829	153.9816257	149.7557171	204.0047301	198.6760261	198.3168225	166.025103	169.3055934	178.7755334
SON	255.3723915	35.38815328	102.6221597	176.196261	350.6178873	329.5877444	172.318584	269.7237304	273.017686	233.8572875	256.7285046	269.2584745	275.153737	248.1521648	109.2051483
HIRIP3	82.79509768	82.26156349	83.59507651	161.0517729	156.5314079	153.2586989	172.318584	169.8260525	170.1116174	84.63126487	86.56948547	78.19571862	150.986743	156.8271295	158.7785381
NCLN	121.1231697	151.6816773	129.7564349	161.8068997	162.7646148	150.8323349	172.1275858	157.175076	149.8334114	173.563945	179.0988745	176.6326233	165.2209126	176.0368783	193.4639452
HNRNPF	207.7147256	122.6930584	181.750008	119.6456515	139.2732164	135.2001863	172.0893861	185.4248292	184.6015999	262.6804463	245.9403247	268.3224659	148.0112386	146.1200564	115.4317577
CBX6	50.16171284	49.84008174	51.24903503	195.1583348	191.2036212	182.8523849	172.0893861	172.8966778	170.9274073	164.5199437	155.6364693	158.0684526	119.4222708	121.5961353	99.5858352
ADAM15	205.129903	270.2637766	232.7508637	193.9836931	185.7885227	180.0680327	172.0129869	145.0563413	137.36348	197.0195258	199.6567698	191.8037627	153.1982665	162.1413018	196.1781082
NUP62	173.7020955	207.8072884	197.7385488	125.7286177	128.3904267	122.7103779	171.995415	166.8766145	156.4436404	175.6848736	177.0996664	183.6343576	168.6934067	176.8241631	171.0505464
WNK1	186.7938179	23.86051532	72.55109559	153.5005045	342.7095061	309.6199617	171.8983879	260.8393877	267.8898638	188.2696383	207.0877888	202.0998573	274.5103847	262.4020194	89.40772379
GAK	119.8711463	152.1054876	130.9559684	150.6058517	146.1687015	139.0982793	171.7073897	151.7298338	149.9499528	140.2187855	143.2640112	145.3543358	150.906324	153.0087983	168.2781087
MTA2	119.8307585	140.7897547	137.0777257	222.8882702	196.423932	195.3421932	171.7073897	152.4667838	147.6579716	144.1893227	148.6581012	145.7443394	167.7139028	168.4395801	186.3991384
ATAD3A	141.78923	175.9668505	153.8782265	164.3596479	159.1606525	155.2447376	171.1958965	157.3986176	157.1362848	155.5443238	150.4230625	151.2827803	150.5955044	165.5758317	177.835954
LRP1	181.8664999	185.967924	203.5484273	134.9998971	160.9336103	137.9845384	171.0579958	155.7421175	150.5326598	129.9983287	139.5296413	142.4683093	152.8765904	161.3146528	106.0120154
JUND	263.6519013	317.1795678	286.8539612	144.564837	128.9105099	127.7222118	170.5996001	166.8782521	165.1003366	188.5637522	184.6061272	195.1187931	149.5392003	150.0958446	167.2004263
CDIPT	141.7209745	181.6450598	162.3506558	184.2928987	166.8551568	163.3221432	170.3322026	153.6131506	149.0564686	121.5057908	119.9902106	120.7451096	158.9482277	159.8188117	186.279396
CHAF1A	163.6919663	170.4988511	159.7447726	156.4371089	174.9583258	170.5614589	170.179404	178.4647451	171.121643	220.4751066	215.6127141	211.5769444	169.6439597	174.6984942	147.4828301
TXLNA	80.89686861	86.1606175	85.7873274	181.3982459	175.2310286	165.3109662	170.1412044	172.2006694	162.4587312	120.1455142	123.3850924	121.9151204	151.2682096	153.5205334	134.2712423
COX7A2L	221.0427169	306.5843123	251.6952205	150.1863368	100.5494186	113.3629099	169.759208	144.6878663	153.6404309	167.8654889	153.712703	151.7893949	150.3433907	150.4107585	208.6712411
PRDX5	184.9763646	248.3104072	206.0302207	219.364345	189.7621921	194.7455463	169.3390119	153.817859	152.3196282	165.2552283	156.4663293	149.839377	151.991981	155.6855666	197.096134
PLK1	258.6438076	314.2128963	285.8198806	119.5197971	98.13405091	108.0726408	169.2626126	150.6244086	149.5226342	138.3805738	146.5834512	153.2324082	169.5233312	180.6031301	203.1630866
NCOR2	165.8325225	183.4250627	184.9763395	156.9405268	196.2681018	170.1636943	168.9570155	166.8782521	163.5852982	156.542105	166.6132537	172.2645831	215.3621826	222.8409589	157.4613707
NOTCH2	175.3870768	74.3117314	109.6625942	166.3703829	210.4369602	188.5097907	168.9512856	179.0289213	180.215758	164.5136937	164.3179364	177.0616272	209.3355799	211.6953681	107.6369209
ATP5O	219.7919051	208.8562187	210.7456283	183.4165321	148.8567719	162.097426	168.9188159	149.8530675	161.9925656	211.7619833	192.8292853	190.4761905	201.1682224	197.4120539	249.3034592
SDHA	275.4831188	335.6945648	295.163833	187.9946983	178.6947437	172.8649136	168.8745043	162.3746683	158.5666365	210.4697205	200.6624092	211.6873154	213.9061959	225.4409669	220.4439233
POLR1A	87.56086428	94.59444085	101.5467159	103.955794	100.3935884	90.69032794	168.8424166	158.4442678	150.7657427	128.0865885	141.3402449	137.437263	170.8502453	173.0451961	134.0716715
SLC39A1	150.2024236	181.5179167	157.5525217	183.8314323	157.4274314	154.4519927	168.4986198	152.6714922	148.6291501	151.2848197	152.7696802	152.5694021	156.0531424	163.2041363	181.2102973
PRCC	194.7906127	226.9503722	212.9792424	170.5328098	159.8038415	156.5601451	168.4222205	165.8547104	160.5552214	177.6447749	178.2690145	179.3626483	168.3170456	173.6356597	179.0948467
ETF1	155.008578	61.70676787	113.6247774	276.8378873	334.9959126	332.6107554	168.3458212	209.7032403	231.2181655	137.2041184	139.1524322	139.2312795	278.7323841	253.2695159	211.6648032
EMC1	155.3316808	123.964489	132.5691342	188.5299993	176.9062029	167.1009069	168.3458212	172.4463194	161.2544699	136.5055979	132.7021568	126.4781623	180.2994822	184.4608255	149.9575082
DNAJC5	96.16347687	117.3954306	101.6294423	191.2568462	172.465043	162.2084023	168.2312223	150.1740503	156.1654948	158.8582517	160.8419547	164.7765143	166.0653125	169.6992358	182.7669497
DNPH1	156.1394379	200.0808043	165.8665298	136.6779568	117.2622045	127.563106	168.154823	152.4258422	165.3722666	111.4323909	114.4075161	110.0590114	149.6196194	155.764295	178.5759626
TACO1	59.69324604	84.8044248	68.45613638	142.7609229	117.7296951	119.4487082	167.9256252	147.6766083	147.9687487	73.01376717	72.19781925	75.62169496	117.0901187	119.7460161	151.4742463
BCR	144.5008704	182.6096519	171.8641974	136.9565147	127.2275441	117.7725282	167.9149293	154.8168358	151.1849033	150.3962282	162.7506327	164.416151	132.8442081	129.9216719	126.9394098
PRKDC	305.6148801	27.84433138	108.7439169	215.0852929	511.9410731	471.3510465	167.7728266	316.8885357	336.2996739	292.4594753	346.3156628	329.1240246	373.827896	330.5021535	136.2270363
SF3A3	102.2216547	83.4482321	84.67052034	156.9824783	128.2482317	130.6258934	167.6582277	159.549693	160.5940686	140.5496636	136.2102013	136.5792552	162.3258273	160.6454607	167.5596538
NDUFB9	172.5772939	216.5246408	180.6745642	202.8354576	158.3624124	173.5844698	167.6200281	154.186334	155.6604821	214.0413658	204.7490924	197.9658193	162.2051987	158.2836064	225.5549318
USP9X	163.9342934	26.19147153	77.55604575	178.3777385	378.5114882	350.1521741	167.3908302	329.4166871	356.6944213	281.062563	344.8445473	348.4682024	286.935126	251.6162178	100.6236034
NOLC1	212.3997164	77.89631823	120.5324359	126.609599	175.7374766	170.7603412	167.3908302	217.5640412	210.823418	163.1964313	155.1838184	162.2024906	260.5174721	263.976589	141.7751049
HSPA4	181.7049485	87.64395326	149.5694194	300.1629161	414.7420032	402.2991126	167.3144309	215.5578993	236.0740578	136.9467687	138.3602931	145.4323365	275.9579273	260.5125359	193.1047177
WDR46	102.140879	139.0097518	121.5665165	130.8466996	110.405677	111.6922986	167.2380316	145.0563413	149.3283986	86.91064733	89.54943726	87.00979962	127.504384	128.6816984	163.8476367
RBM42	140.6708904	180.6702963	163.508826	113.3948794	108.1461395	104.9303005	167.1616323	153.695034	141.3258881	174.666872	175.7794345	166.3365286	139.0043064	149.8202949	166.2025723
YTHDF2	76.81769551	32.16719561	51.08358213	207.5340246	222.252783	224.577891	167.1234327	191.934555	190.9336834	121.7631404	115.0487715	120.1991046	163.7331604	159.7794475	119.5030022
SERPINH1	102.2216547	133.627362	122.2283281	252.5060226	227.1224759	226.6860434	167.0852331	150.829117	150.3384241	117.277904	117.349747	124.8011469	152.152819	163.2435005	181.9686664
EIF4A3	113.934132	129.3892598	119.2088127	199.6890958	180.4513394	192.5976175	167.0088338	157.9529678	157.9913103	154.3730153	145.2254985	152.0623975	144.1109153	146.5924273	149.1991391
ULK3	133.8453433	158.5897839	150.0244149	108.4446035	98.95215932	105.1291828	166.7796359	153.4903256	154.7281507	136.2482483	133.7960632	134.4342355	144.9151057	145.8445067	154.9866926
8-Sep	176.373752	120.5740073	147.2944421	202.4998457	210.9940531	199.3993921	166.7414363	166.3869521	171.0439487	192.4975251	189.8116126	181.5076681	188.6630621	198.3957662	153.350212
ALYREF	245.3158163	303.956689	274.0727249	212.610155	181.503193	188.4210892	166.7414363	153.1627923	152.5915582	297.2755898	297.9197369	293.7506996	160.8380751	165.0936198	184.8824003
NDUFB8	166.7945611	214.1059559	176.5585097	171.3156246	152.1412824	153.8107962	166.6253094	156.7410943	157.358102	123.3748844	121.3089335	113.8436062	146.6943769	147.5729905	172.1410013
HYOU1	165.8325225	198.1736583	184.6454337	228.258061	202.735054	200.1551448	166.5504381	143.9918579	141.287041	322.7532034	332.3212057	333.1800619	171.4935976	177.8476333	183.4454904
C16orf58	126.0908756	168.9731343	143.4890254	181.9855667	172.9714911	173.1469287	166.4740388	148.8229751	141.4035824	93.60173777	95.16985265	86.97079926	165.4219602	165.5266264	202.8437733
NUB1	65.10521828	31.27719415	46.69908035	226.4121954	268.5343442	265.6271974	166.2830406	189.0276963	192.2544861	70.10939275	67.70903112	72.18966342	206.0335742	204.5365876	164.9652332
CUTA	243.0944844	271.9166364	245.6975529	133.1120801	127.2742931	124.6594245	166.2066413	157.4207261	155.5050935	163.3434882	165.1798592	168.3645473	140.9343633	145.3327716	170.6729584
SMARCC1	209.249464	58.78247736	136.1677347	183.5797234	256.7302086	236.94837	166.1684417	205.9366065	222.9825722	205.1444214	202.8253261	199.9548376	218.9006202	205.4026008	146.8042893
VEGFA	59.20859181	29.41242919	45.58227329	145.4877698	182.5940042	186.670925	166.1684417	198.4442807	201.4224106	133.4541666	136.323364	123.943139	157.6615231	156.1185732	114.4738178
INPPL1	156.0586622	192.1555532	178.2754972	234.928348	237.0566494	228.1577724	166.1684417	154.7595174	144.2394235	148.6745591	152.0907039	151.1263889	199.197956	207.6857267	202.6042884
OGT	116.4785667	27.80195036	69.82112278	207.1145097	413.3005741	405.5210058	166.0538427	290.1126827	310.3886328	219.9236431	234.3977267	200.9688469	277.6467271	242.5230785	156.7030016
UBA2	161.5514101	74.9296467	128.2673589	195.6198012	219.954288	232.0558654	165.9010442	219.9795998	231.645484	190.5490208	183.5876626	200.2668405	223.1628292	207.4889055	174.2652331
PYGL	80.25066297	35.55767736	52.903564	243.9479185	269.9757733	269.7639492	165.8246449	193.5312801	194.7407029	104.1530727	96.71640991	93.32785768	204.3447744	197.2542033	156.2240317
LENG8	125.6869971	126.5497314	128.1846324	130.2174272	217.5389203	212.6847296	165.7864452	190.5834798	180.6780389	286.7610191	302.1444787	286.18463	224.932048	244.8062044	126.088839
MRPS16	70.84029333	85.10109195	74.82607294	168.3093808	126.1834819	129.9496936	165.595447	154.3910424	154.8835393	83.71215904	86.30543911	82.9927627	123.0411274	126.1230228	139.5399118
RSL24D1	106.7047064	136.2549854	142.9099403	212.0228341	168.1797133	176.9654689	165.2134506	157.8710845	183.7081157	126.1013199	120.8200706	109.9420104	146.0409722	134.6256985	184.4832586
RHOB	327.4647083	332.6062598	345.4656502	186.5582792	162.9594025	173.0673758	165.2134506	156.8884843	163.818381	88.63856629	85.21153276	91.45584048	198.9969084	225.7932768	206.0768205
TBC1D10B	145.3962691	176.6864803	156.9734366	145.5716728	143.480631	137.0696799	165.2134506	159.6315763	154.1842908	138.1232242	144.3201967	148.5523652	138.4413731	145.6476855	149.7579373
AKT1	156.8664192	212.964635	181.9981874	162.4781236	162.491912	160.2991323	164.9842528	153.6540923	144.0451878	167.9390173	167.2545092	167.896543	146.2420198	147.8127187	170.6729584
SLC16A1	200.0410336	59.75724086	134.554569	230.649296	284.5848519	278.9920878	164.9460531	218.6285246	252.0013844	224.3721153	225.571034	232.7931394	216.7695157	198.2776735	147.2433451
FEM1A	105.3315194	126.6768744	113.6661406	133.6994009	127.0015903	118.1758615	164.7550549	153.0809089	151.2707555	137.0570614	140.5103849	131.2362061	134.2997927	136.2396323	134.0716715
HMGXB3	179.2412895	222.1189357	207.3952071	134.3706248	126.5340998	123.0683661	164.7550549	146.0798831	141.0539582	122.0204901	126.6668114	128.7791835	144.1511248	145.8051425	160.8141603
POLG	268.4580558	323.7910072	291.6520952	100.3060143	107.9903093	102.981254	164.2202599	160.4913514	149.6780228	314.9224218	314.1397277	332.8290587	159.3905324	158.0867852	139.6995684
RAPGEF3	14.90311758	18.69003065	15.71802527	107.4377677	124.7030953	115.0732977	163.8764632	157.2979011	160.3221386	39.33772954	42.70006865	35.33432472	80.66029466	74.5558693	82.46265953
SLC25A11	116.2362396	152.5292978	129.8805246	134.7481882	117.8076101	120.4828962	163.8382635	150.3787586	143.0351622	124.9983929	133.7206213	123.826138	116.4065569	124.7846387	147.7622292
NDUFB4	164.1766205	195.8850832	173.4359999	156.8985753	119.521742	124.7389774	163.6854649	154.0225674	145.2106019	149.0054372	146.7343348	147.6163566	132.6109929	132.6574866	173.5467781
CBX5	160.6628774	21.23289197	54.39264008	208.7086663	464.2570404	399.8329721	163.6090657	301.1259923	316.1768564	170.6228064	188.7177062	162.1634903	302.5766288	265.9448009	132.6746758
AMZ2	83.19897621	76.2858394	82.02327398	205.7301105	150.5709038	166.5838129	163.570866	151.8936004	153.1742652	89.19002979	83.77813823	86.54179532	143.5077725	146.6711558	185.7605118
GTF2F1	171.3252704	216.863689	193.6212534	149.0536465	147.7659607	145.820501	163.5326664	147.594725	141.4812767	199.4827294	206.4842542	206.1948949	159.3905324	171.1557126	174.2652331
ERP29	198.1831924	240.2580131	215.8746681	159.2898103	139.4680041	143.314584	163.4944667	150.4197003	139.3835312	180.3285639	172.9503664	181.6246691	162.3660368	168.6757655	199.570812
EZR	175.4448314	154.7331109	157.3043424	150.9414636	138.0655325	138.1038678	163.3798678	160.5732348	156.476272	233.8572875	224.9297786	232.8711401	126.0166318	126.6741222	117.5472083
SRP72	132.8760348	102.4773109	142.0826758	178.8811564	182.8277495	181.4999853	163.2270692	174.7799947	188.4863137	161.0273415	160.6156293	161.3444828	186.3711195	175.5645074	201.8459193
GSPT1	184.8148132	78.44727152	112.63206	219.7419084	270.7549241	266.1840678	163.036071	207.6152151	210.5126409	122.5719536	119.1603506	122.851129	214.9198778	203.8280313	144.1699546
WBP2	151.4140591	175.0336204	167.562422	221.419968	216.2922789	203.6554733	162.9978714	150.0921669	136.5865373	149.7774861	147.1492648	153.7004125	161.0391227	157.6931428	167.3999971
UBALD2	108.3606083	138.1621314	118.712454	159.2478588	139.5848767	145.7807245	162.9214721	147.594725	146.0263918	105.2192355	100.7148262	105.4959695	128.429203	140.3728775	154.827036
RNF41	86.87427079	113.9625679	96.66585542	130.0076697	109.3148658	110.4194519	162.8450728	144.7697496	142.141678	79.44750799	80.08148917	78.74172364	115.8838331	119.4311021	138.9411993
SNHG16	306.6649642	268.7380598	275.6445274	223.0980276	210.0590721	188.8984067	162.6922743	171.1771276	158.729406	169.777229	158.3523747	155.5334294	188.2207574	191.9006668	170.313731
RBM23	64.45901264	58.74009634	62.37574239	147.3755869	151.3110972	153.4178048	162.5394757	161.7196016	165.3334194	107.5353822	103.9588244	103.4289505	116.5271854	120.2971154	113.9549337
ANP32A	135.9455116	70.43725838	94.47360452	143.0965348	159.6480114	162.2879553	162.4248768	189.8874714	197.8484739	183.1961741	176.7601782	176.710624	184.9235768	179.7371168	140.1386242
MCRS1	189.8632947	235.1722905	212.3587941	129.4203489	116.4830537	119.170273	162.3484775	141.4944159	143.6178693	212.4605038	207.389556	217.6219999	156.4552376	157.2601361	176.699997
ZYX	178.6758596	193.5117459	188.6576665	220.0355688	221.3567595	213.4404823	162.2720782	155.0051675	148.90108	106.1751055	118.0287233	122.1101222	212.7485638	219.2194489	237.9682363
CD151	128.7564739	152.953108	135.2163806	308.8468747	296.3500299	297.7665767	162.1956789	146.9805999	141.6366652	135.8438417	138.2094095	128.4281803	178.2085872	179.107289	196.6969923
CTPS1	166.0748496	169.8631357	165.0806286	145.4038668	116.7167989	127.8017648	162.1192796	157.9120261	152.9800295	212.8281461	211.3125305	213.604963	173.544283	182.8468917	163.8476367
MAN2C1	125.7273849	142.1883284	141.0899584	92.58694002	93.03061277	92.55982154	162.0428804	147.840375	148.9787743	150.2554212	149.6011239	148.7083666	152.3136571	166.7862821	152.3124437
AKNA	33.72385686	41.19435328	38.88143093	120.5685843	125.8718216	118.5338497	161.8900818	150.2149919	152.5915582	108.3441953	116.0672361	95.08287381	122.1967276	127.7369566	115.7909851
ZNF703	202.5046926	216.3127357	212.4828837	172.8820933	176.9062029	163.2028138	161.7754829	167.0420188	161.3710113	158.0494386	167.1036255	180.0646548	188.1805479	194.734892	160.5347612
SMARCC2	118.6191229	113.0301854	119.7878979	148.9277921	154.0381252	143.4339134	161.6990836	162.0061932	155.4273992	169.777229	178.1558518	166.5315304	164.3765127	163.6371429	130.4793969
KIAA1191	198.7082344	211.6508233	205.2443195	139.1111432	111.6523183	118.0963086	161.4316861	148.7820334	145.793309	205.1076571	202.1840706	198.7848268	154.4849711	157.0239507	163.8077225
SLC35A4	187.1169208	222.627508	203.9620595	189.9983015	192.0996447	185.199196	161.3552868	149.3142752	146.0263918	147.7922175	152.2793084	158.4974566	209.6122214	215.952217	219.6875499
TYK2	131.6240114	155.5807314	143.0753932	114.4436667	119.9892326	120.4431197	161.3170872	149.1095668	142.0251366	140.7334848	144.7351267	141.0642964	134.3400022	142.7347318	140.7772508
PINK1	168.4981207	223.4327474	194.4485179	201.9964278	183.1394098	186.1140546	161.3170872	142.5179577	141.287041	167.6081392	163.5201392	158.1464534	153.4395236	158.1261494	188.9536448
GUK1	190.0248461	255.599943	206.2784001	155.5141761	143.5975036	149.3208294	161.2024882	149.8874586	145.3659905	173.5271808	170.7625537	172.3815842	152.3136571	156.2366659	197.1360481
CNP	144.2654092	184.9083985	162.8883777	150.8156091	137.6369996	129.551929	160.9732904	146.1617665	144.5890477	176.6521406	182.5314772	183.1846835	128.8312982	132.3032084	145.4072936
ARID3B	149.1523394	169.7359927	164.7497228	126.525696	129.6117457	118.2554145	160.9350907	156.3971843	149.6003285	128.0130601	132.6644359	129.2861881	154.6458092	165.3298052	150.0373365
DEAF1	144.4673485	190.9688846	169.58922	223.1819306	201.6052852	206.4398254	160.9350907	138.3419073	132.9737535	142.9393388	148.2054503	140.9862957	183.9183389	197.8053027	224.8364768
DNAJC8	146.1232504	122.2268671	144.7712854	191.4246522	176.5166275	176.5279278	160.8586915	157.0931927	163.8572282	189.8872646	170.0458564	165.6345222	156.8171232	156.1579374	195.2201683
ANAPC7	91.58026337	84.6925389	82.21602661	145.8477136	120.6452776	125.2035664	160.7891681	151.0342348	143.0507011	106.3140743	98.28748576	95.66592917	131.2683971	131.1805403	142.5346714
TLE3	206.220375	188.5531664	203.3829744	123.6729946	134.9099715	127.4835531	160.7058929	167.4104939	155.3885521	205.9164703	210.1431824	232.9491408	185.0442054	195.7977264	128.4038605
AHSA1	94.50757492	101.8415956	98.56856374	178.3777385	155.7912146	157.1170155	160.4384954	157.6663761	152.4750167	105.4765851	98.37612989	101.5569333	133.6564404	134.9799767	148.7600833
ARPC2	120.1538613	106.6730321	110.3157195	181.1465369	155.4795543	162.0492965	160.2856968	161.1054765	168.7519676	148.0495672	136.5119686	135.6432466	154.4849711	154.4259109	166.1227439
NPEPPS	158.8858118	69.80154305	111.887522	208.8764723	214.2664867	204.1327908	160.2474972	171.2999526	173.4524713	175.9536202	166.8773001	177.1786283	158.3852945	157.3388646	131.5171651
ARFGAP1	75.60605993	95.73872845	78.59012636	182.0694697	166.6214116	167.1804598	159.9037004	143.5824412	143.5790221	110.5868135	109.1643098	107.2509856	145.638877	148.2063611	178.2566493
THOP1	156.9471949	217.2027372	174.7182599	137.8525985	137.4422118	133.2113633	159.9037004	140.0205158	141.287041	247.018883	258.0864573	239.8132039	143.3871439	151.158679	179.0150184
PSMA4	152.262204	140.4083255	161.9370235	148.3824227	124.5862226	128.1199764	159.8655008	150.6653503	175.7444524	233.1955313	217.1592714	207.5209071	159.2699039	153.6386261	183.6051471
FUCA2	131.3412964	119.1330525	110.9775311	166.7152241	126.2224394	131.978293	159.8655008	147.6356666	150.299577	111.9838544	104.2983126	106.3539774	126.1372604	124.7846387	138.3824011
SLC6A9	32.14873061	32.63338685	33.75239111	107.3538648	115.5480726	109.6636992	159.7509018	141.1259409	137.7519514	82.68276051	92.7557145	84.66977812	102.4136443	98.13504866	109.6841183
PRDX3	210.9457538	104.5116	173.3119102	153.2068441	171.8417223	181.1419971	159.7127022	184.3603458	202.7043662	149.4098438	146.1308003	143.8333218	168.2768361	160.8816462	126.0489249
BYSL	118.0536929	161.9378846	139.1872501	78.07172423	71.79875182	68.17685179	159.7127022	134.0839734	137.4023272	95.88112023	88.4555309	93.63986055	103.5395108	107.8186515	128.6832596
MMS19	248.3045173	301.964781	265.7587168	115.408551	101.2896119	104.890524	159.5981033	141.7810076	133.129142	149.4098438	153.9390284	152.4914014	147.9710291	148.3638181	156.9025724
HACD3	198.9909494	74.33631239	116.1479341	152.2839113	191.476324	185.2787489	159.3689054	191.1566632	197.3823083	253.9305588	220.629595	228.1910971	144.9553152	142.931553	126.2085815
ELAC2	177.746939	226.4417999	202.5557099	157.4858962	143.7922914	143.7123486	159.3307058	140.3480491	141.0928053	157.4244466	152.5433548	167.4285387	154.0024569	157.0633149	180.3321858
SLC1A4	28.23110892	37.25291824	31.97377246	185.2997345	156.609323	152.7416049	159.1779072	142.108541	136.8584673	91.72676188	95.62250356	89.4668222	102.4136443	98.92233345	119.8223155
ITGA5	99.63683219	132.0592642	117.7610999	153.0809896	152.518781	138.3425266	159.1015079	145.1791664	139.7331555	84.07980137	91.32231997	83.1877645	113.6723096	113.3690093	133.1137316
ST13	260.7035881	149.7321503	195.8135043	185.257783	211.6173738	212.6051767	158.8723101	197.9529806	191.4775433	352.2013542	339.3750156	353.2652465	176.9620921	177.4539909	117.7467791
SUMF2	159.2896904	208.3027226	176.3314256	148.8438891	120.6515108	121.4773077	158.8723101	146.0798831	141.558971	147.1672256	153.7881448	141.025296	157.0583803	159.2677123	192.9849752
IPO4	118.4575715	144.8871519	130.147731	120.8878352	113.2885352	118.9602533	158.7367014	146.3734349	142.9011396	126.7163856	132.047699	133.4752166	129.4859091	138.2991693	153.6188343
APRT	179.8471073	217.7536905	187.2099536	176.6577274	164.5566618	164.1972253	158.7195115	143.9509162	142.2970666	132.571825	135.6066668	129.3641889	151.6703048	161.7476594	184.9622286
UNC119B	75.84838705	63.57153283	64.89889908	188.6558538	152.518781	160.9753321	158.6431122	148.8639168	153.407348	148.490738	147.4133112	140.5182914	142.5829536	141.3569834	133.8721007
SMC4	93.94214498	44.9238832	91.2059098	216.2179832	292.8048935	300.1133878	158.6049126	244.9949609	271.4638005	197.4239324	220.9313623	201.631853	220.9110961	184.7363752	114.2343328
COX7C	354.3630181	374.9449006	410.8195447	284.0954952	236.5891589	240.4884749	158.4903137	148.4954417	149.3672457	244.6659721	219.6865723	217.9730032	191.5179379	183.9097262	230.9832578
FSCN1	397.0125904	506.8770218	444.5719358	89.81814163	87.34281149	80.54733074	158.4139144	142.5998411	128.0790141	330.9883917	338.9978065	374.754444	148.815429	154.110997	156.7030016
MZT2A	152.1337707	184.7350601	171.6197407	133.3482669	118.6829861	127.7369291	158.3680748	139.0919587	140.872542	162.0703428	159.1618654	158.7864492	127.7267427	134.83984	165.1492375
TRMT2A	111.3493094	146.4688116	128.8050808	98.83771213	101.2116968	103.1005833	158.2229162	148.0041417	140.7043339	158.3435525	160.4270247	156.0794344	125.2928605	129.0753408	135.8678088
AKR1A1	122.2136418	143.6292832	128.3087221	128.0359497	106.39305	118.215638	157.9555187	138.4647323	137.4411743	90.77089182	93.39696994	90.01282722	150.4238097	150.33203	188.6343315
ERH	89.37831765	70.8610686	80.45147145	174.3084439	159.9986293	165.2711897	157.7645205	163.6438601	173.2193884	144.7040219	137.1155031	131.9772129	150.7454859	141.9080828	140.0188817
HNRNPA3	334.2498675	106.503508	207.7261129	185.8031524	280.2605646	289.3339673	157.5353226	241.1464438	263.6166786	404.9580289	416.6651575	430.9929608	256.6975679	247.9553436	129.4416287
C15orf39	97.65782741	108.0716058	106.3034867	94.30695114	102.7699985	95.90104415	157.4207237	148.8639168	144.3559649	135.5497279	150.2046584	161.9684885	109.4905196	116.0064133	104.1759639
DDX42	47.09223605	13.47716496	26.38973717	166.2537577	238.8486964	235.8744056	157.3061248	192.05738	199.1304295	157.1303328	154.6934466	150.4633828	189.4270429	184.9725606	114.8729594
THOC3	167.1249338	215.7194014	192.628536	134.4545278	105.6138992	114.8346389	157.2297255	146.2845915	142.5689965	174.4462866	162.5016747	159.9794702	136.1896401	146.4349703	164.2467783
PODXL2	249.7180922	313.746705	288.2603108	128.4974161	120.0671476	118.215638	157.0387273	141.7810076	134.255709	164.6302364	166.8018583	159.3554645	193.0458996	209.6539387	218.6497817
ATF5	14.33768765	18.47812554	15.13894013	140.201882	141.6106689	143.9112309	156.962328	149.2733335	144.9775191	268.3421383	276.6828653	256.2323548	87.33507478	87.86098219	94.5965649
NHP2	267.2464202	339.7262715	287.2675934	125.4769087	107.8734367	108.8283935	156.7331301	146.4074165	136.0038302	187.4608252	181.8902218	184.4326949	165.2611222	172.5728252	208.5914127
PYCR2	93.32542247	129.2197357	110.5638988	124.8895879	114.5277746	119.3293789	156.6949305	143.7052662	143.2787338	133.4968131	132.610495	126.7047544	115.7459145	121.3619181	129.1913669
WDR18	108.6837112	145.7907153	119.9119875	121.5754201	112.704172	113.4424628	156.6949305	138.7922656	132.4687407	131.6527192	132.8907614	136.6572559	150.4640193	158.0867852	203.2030008
H2AFX	242.6098301	274.0356875	261.1673988	158.8702954	148.5061541	152.0256287	156.6185312	149.0276835	147.1529588	216.908976	224.4771277	211.6939455	146.6843245	148.9542816	162.0914135
PLEKHM2	120.9616183	156.5131138	136.7468199	144.9424004	140.8315181	137.1492328	156.6185312	138.1371989	141.0539582	137.6085249	144.5088012	137.7492659	138.200116	149.7809307	158.7386239
LAPTM4B	218.4175065	162.5736	183.6113531	173.4694141	154.1160403	163.2823667	156.5803316	153.4903256	166.8484578	183.8946946	167.6317183	173.122591	177.726073	178.6742823	164.2467783
ATP1B3	162.2783915	153.7583474	154.4916431	201.9964278	160.5440349	163.4414726	156.5039323	155.9058842	151.5815326	160.1817641	148.1300085	155.4554286	168.9603979	167.2980172	177.8974218
ITGB1	220.5984505	84.76204378	174.925076	140.8731058	184.2691786	178.6758566	156.4657327	216.4586161	247.3397278	224.9603431	233.6433085	244.6882487	180.0180156	164.5425204	103.0184532
CNOT3	94.54796277	111.7163737	107.7925628	152.1580568	156.102875	151.5085347	156.427533	147.7994333	146.1429332	123.5645878	128.5905778	124.4501437	152.152819	167.770388	156.7030016
ATG13	85.37992025	102.3077868	89.5100176	224.2726694	195.1772906	195.7797343	156.427533	146.4483582	143.4624807	123.8587017	129.6090423	121.0571125	148.2927052	149.0723744	168.7171645
PSMC3	98.82907514	132.0168832	110.3157195	218.5253152	188.1259753	203.1383793	156.2747344	141.740066	138.8008242	171.358091	168.8387873	163.8015053	155.9727233	163.5977787	191.3884087
HMGB2	163.0053728	103.2401693	168.472413	153.5005045	180.1007215	180.9431148	156.2365348	175.6397698	211.2507366	192.2034113	187.0579863	176.710624	181.6666058	166.0383615	136.2270363
CABIN1	162.399555	191.5198379	183.6940796	117.2544166	126.0276517	115.3517329	156.2365348	150.0512252	141.3258881	183.4535238	185.1719408	198.589825	129.3942314	132.2244799	112.2386247
ARPC1A	186.4852548	233.2659921	202.578046	137.7976421	115.681697	117.269356	156.2212549	145.345799	142.2022796	182.6785337	179.557938	184.2310631	141.6187293	141.3931985	153.5150575
CAPRIN1	144.6692878	44.28816787	96.2935864	241.2630231	317.1533579	311.4496788	156.1601355	193.5722218	196.178047	176.0271487	174.1951564	191.725762	211.9443735	196.6243755	142.6133023
FOXRED2	97.57705171	109.9363708	112.5079704	133.7833039	140.32507	125.7333889	156.1601355	150.6244086	142.6078437	173.8948231	188.415939	189.6197426	118.6180804	117.3841617	112.8373371
DDX11	91.59964953	99.51063939	92.69498588	144.4389825	172.1144251	170.7603412	156.0837362	160.040993	159.2344188	172.9389531	177.66548	167.8185423	165.1807031	168.754494	144.8085812
DAXX	127.1005719	147.23167	147.1703524	95.10402946	90.88794791	93.59400949	155.9691373	143.7871495	146.2594747	145.9907701	142.3587094	145.7833397	117.1303282	121.2024929	118.1858349
DDX39A	144.06347	169.9055167	157.0147998	144.480934	137.0136789	134.6035394	155.8545384	140.0205158	139.033907	224.8500504	219.4979677	225.2660702	146.2420198	153.0087983	179.6137308
HMGB1	146.2040262	117.7768598	156.8907101	214.2462631	233.7452582	243.789921	155.7781391	181.0850121	209.8522396	218.8207161	206.8991842	216.0619856	193.8098805	178.0050903	157.2218857
DHPS	160.6628774	199.360327	185.6381511	150.5639002	136.4293157	134.7228687	155.7781391	136.6223571	130.6429252	117.9764244	116.4067243	114.8560555	160.3153514	168.9513152	199.810297
GRB2	131.3009086	143.9683314	134.0995735	212.8618639	187.385782	182.8523849	155.5871409	141.9447743	141.6366652	153.3436168	140.9253149	140.9862957	155.1283234	151.7097784	153.7892678
C8orf33	175.3640557	207.8789124	202.5970731	152.5775717	113.7170681	120.1646845	155.5871409	135.0665735	144.4725063	183.4535238	183.8894299	178.0756365	167.5128552	168.4789444	183.5253187
SCAF1	124.4349736	148.0792905	130.7905155	115.9119689	121.3527466	111.3343105	155.472542	142.8045494	143.6955635	158.1229671	164.9535338	176.7886247	124.2072035	129.1934335	128.7231738
SPINT2	206.6646414	260.2194744	231.4272405	279.9422976	224.2006602	233.0033407	155.3961427	138.874149	139.3835312	141.4687694	130.7406696	133.1472236	158.505923	158.8347057	181.1703832
PFAS	84.85487816	105.3168394	91.86772139	119.771506	111.0289977	106.6009118	155.3197434	141.1668826	142.5689965	90.47677795	97.16906081	95.7458799	133.8976975	145.0178577	141.7751049
MCM3AP	114.4187862	107.6477956	111.9702484	123.2534797	120.1061052	119.4089318	154.8231481	152.7124339	147.2695002	110.4397566	111.955657	113.9200469	179.2942442	188.4366137	157.780684
CLPTM1	127.3025112	147.9097664	145.4744602	167.386448	166.8941144	164.7540958	154.7467488	143.2139661	137.2469386	155.1082999	168.159811	172.4205845	125.2124415	132.5000296	141.815019
CKAP4	144.06347	133.9664102	138.5254385	172.1689179	154.9731062	155.7646159	154.7085491	152.5486672	140.3547097	202.9385674	187.3974744	193.3247767	152.7961713	151.316136	139.6197401
ZNF503	196.6888418	176.3050511	192.5040327	135.2516061	142.2729472	148.2070886	154.7070211	163.9713935	158.457476	158.4898741	146.3571258	181.390667	185.5657229	197.8045154	152.7507012
RER1	76.41381698	95.0606321	79.54148052	180.1397011	154.2718704	155.0486396	154.6321499	145.1791664	148.4349144	147.8289818	146.7720558	134.6292372	125.7753747	132.9330362	146.1257486
EPHB4	136.4705537	161.5564554	143.5717519	143.1384863	134.3645659	131.9385166	154.5939502	145.4248164	142.2582194	148.5275022	157.7865611	151.9843967	137.8784399	144.9391292	143.4914139
SERPINB6	105.6142344	119.1754335	105.6416751	114.7373271	96.96532462	98.8047257	154.3647524	145.0563413	141.015111	103.2339669	105.1281726	100.542924	115.4817379	114.4318437	150.8755339
DAP3	127.402673	126.8887795	123.5933145	172.7562388	125.7549489	140.1722437	154.3448885	139.5701574	144.8998248	130.2556783	118.8963042	119.5602788	174.9516162	184.0671831	216.4545027
SERPINF1	126.8178569	153.0802511	138.2358959	135.6291695	118.3140582	120.0851316	154.2501534	147.3490749	135.4211231	95.66053483	92.83115631	89.03781826	126.8610317	127.3433142	155.7051475
HAGH	152.5045311	186.1798292	165.4942608	164.7435041	152.8693989	154.8895338	154.2501534	142.5588994	138.9562127	103.1604384	103.2421271	93.79586198	130.3592599	136.7120032	158.4991389
ZNF207	98.22325735	54.62913721	76.06696967	143.4740983	177.4905661	185.4378548	153.9827559	187.0215544	189.3409507	181.4314909	188.1896135	194.0657835	143.3871439	142.6560033	104.3356205
DBN1	205.7761086	275.9004525	241.7680466	136.3842963	127.4301233	131.5805284	153.9063567	141.2078242	138.3735056	233.7469948	242.3568384	252.2933186	148.895848	154.8589175	165.9630873
GNL1	208.8859733	245.4284978	221.9550621	107.5636222	124.5472651	118.3747438	153.7917577	148.7410918	154.1842908	144.6672577	142.3587094	139.0362777	136.4308972	142.9709173	132.0360492
FANCI	114.0956834	31.27719415	60.84530309	135.1257516	196.4628895	189.2166184	153.3715617	210.8496071	209.4637682	239.0778086	227.645684	233.846149	204.6664506	200.5607994	124.0532168
ATP5F1	174.7986257	141.8068992	168.5965026	220.4550837	200.1638561	209.5821657	153.333362	152.6714922	160.8659986	171.6154407	167.1790674	168.0525444	207.0790217	197.3329318	222.2021421
EXTL3	137.8841285	181.7722029	164.1292744	142.425311	121.9760673	126.3300358	153.333362	138.5056739	133.0902949	122.5351893	125.1579751	123.826138	128.3085744	130.5711819	130.000427
SNRPA	259.3707889	280.9014131	286.7712348	192.4734394	179.9838488	182.772832	153.2569627	140.0205158	127.8070841	162.203797	173.0635291	172.030581	216.4478396	226.1081907	224.9961335
CCDC124	163.6919663	206.9889109	187.0031375	136.0486844	132.8841793	126.5686945	153.1041642	143.8280912	140.0439326	137.461468	138.8883858	141.2202978	155.1283234	163.0073151	183.0463488
MED16	135.3396938	155.8773985	139.6422456	117.4222225	116.7167989	111.6127457	153.1041642	139.3245074	133.4399191	127.4983608	139.1524322	141.2202978	135.9081735	149.347924	156.3836883
TXN2	136.6321051	185.2050657	150.0244149	126.609599	112.2366815	112.2889455	152.9513656	130.9314647	132.4687407	153.8215518	156.2400038	151.2043896	115.722995	117.7778041	146.6845468
MRPL28	116.6401181	151.3850102	131.7832329	179.6362833	164.0112562	162.2879553	152.8749663	134.9437485	135.1880403	95.80759177	96.30147991	94.06886449	148.4133338	149.2691956	184.9622286
PPP1CA	133.8049554	169.6088496	148.4112491	259.4699701	237.6410125	229.6295014	152.8367667	139.4063907	137.5965629	142.3878753	145.6404285	142.1173061	135.6669163	137.0662814	182.4476364
HNRNPDL	163.2476999	70.26773429	136.7468199	152.8292807	191.5152816	200.4733565	152.7603674	198.7718141	210.3960995	208.1590885	216.2162487	229.5171093	190.1910238	176.6667061	104.8145905
ADAMTS1	924.316393	279.1214102	526.8433892	209.6735506	315.1665232	306.7560566	152.6075688	216.212966	210.0076281	324.0399516	308.217545	351.3542289	293.449068	296.7670003	149.0394824
DHX16	110.5819402	122.3540102	113.6661406	100.5996747	92.48520717	92.08250403	152.4929699	145.7932914	143.7732578	119.0425872	118.4059324	121.1351132	122.5184037	123.2100691	107.9278951
PPRC1	118.9018378	111.8858978	118.6297276	102.6972493	122.7552181	115.1528506	152.4547703	146.9805999	154.6504565	95.4031852	97.01817718	100.542924	142.9448392	149.7022022	109.4446333
RFX5	127.1005719	91.07681604	104.5248681	132.9442741	129.3780004	134.4444335	152.4165706	148.9048584	147.8910545	115.3661638	113.5399352	112.8280369	178.4498443	175.9581498	175.7021429
USP10	90.67072893	61.66438685	73.62653943	146.1170422	146.5582769	142.877043	152.3401713	153.5312673	149.2118571	112.866196	108.1458452	106.4319781	147.9308196	145.6083213	127.805148
RPA2	102.9082482	128.0330671	117.1406515	180.3494586	129.3780004	135.438845	152.2637721	132.6100733	131.9637279	129.0056944	119.4998388	119.7311003	142.381906	144.4273941	179.2545034
ETFB	83.94938251	109.348546	90.73436904	150.0923654	135.1152778	140.8277598	152.2129665	137.3859192	140.6860758	79.65669647	81.67331152	76.68016469	122.4508517	132.1142601	160.9961689
KAT2A	119.4268799	124.6425854	123.4692248	139.0272402	169.3484396	168.3339771	152.1491731	161.3101848	162.5752726	137.4982322	140.1331758	151.4773921	178.0075396	178.3200042	157.4613707
GTF3C2	143.5384279	167.7017036	160.1997681	132.8603711	122.7941757	119.8066964	152.0727739	139.8567491	139.1116013	142.9025745	139.227874	145.9393412	151.5094667	155.1344672	157.4613707
DHX15	89.17637838	37.42244233	76.19105934	200.7378831	269.2745375	262.5246335	151.9963746	195.4964804	227.4888403	114.1897084	117.9910024	130.8852028	184.9235768	166.3926397	127.4060064
STAU1	179.6855559	99.51063939	140.4695101	162.855687	163.3879355	160.7764498	151.9963746	162.8659683	159.1178773	169.4095867	164.1236738	169.6125587	160.9989132	165.3691694	133.2733883
COMT	73.14240093	94.84872699	84.50506745	175.0216193	162.063379	167.6180008	151.9963746	143.5005578	138.761977	96.98404723	102.449988	95.00487309	114.7177571	118.5257246	138.3025727
GLB1	152.1006526	191.9436481	172.5673722	145.0263034	115.1195397	117.3405559	151.9963746	133.7564401	128.0401669	112.7559033	115.5014224	118.7950917	113.4310525	118.7225458	144.4892679
STAG2	88.44939704	71.07297371	117.967916	419.9763736	488.5665472	502.9733319	151.7671767	190.5834798	210.9788066	172.6448392	168.0466483	167.9355433	197.026642	182.4926136	125.9690966
ARF4	127.1813476	122.0997241	120.1601669	221.419968	147.8049183	155.7646159	151.6907774	153.1627923	147.5025831	119.0793514	110.8994716	107.3679867	141.9798108	143.5613809	148.0815425
UBE2Z	90.79189248	100.4006409	91.49545237	169.1903621	150.8825642	160.2593558	151.6907774	144.5240996	144.2005763	122.3881324	113.5022143	117.8200828	139.4868206	141.7112616	144.9283237
EDC4	88.74099733	105.3308251	100.5233897	123.2614505	123.1225877	119.0692408	151.6086482	138.9028081	133.537037	138.4022647	142.2266863	138.3779517	138.550743	141.878166	140.7908216
PPP2CA	165.1733927	75.91966737	116.9474852	238.4426244	266.1279367	279.6301022	151.4749495	183.9738564	200.8579617	194.6309536	189.4178063	175.9762472	196.8139336	176.4348508	160.9694264
IQGAP3	117.205548	147.5283372	132.3623181	131.3920689	139.6238342	135.3592921	151.4615796	151.7298338	150.9988255	162.4979108	172.7994828	145.5103372	160.7576561	156.4334871	137.6639461
OGDH	166.8018309	209.7012963	195.6066882	139.4467552	125.404331	124.2218834	151.3851803	134.7390402	129.5552053	105.2559997	106.2597998	110.1760125	138.6424207	137.8929304	157.1021432
SF3B5	180.7760279	227.9675167	204.044786	152.3678143	139.1563437	138.1834207	151.3851803	132.4053649	130.7206194	145.8804774	141.0007567	145.705339	124.3278321	127.5401354	165.5240315
TRAF4	215.4691932	249.6242189	238.2108093	157.1502842	141.1431784	141.405314	151.2323817	139.4473324	136.9750087	134.630622	145.7158703	129.2081874	151.067162	152.4576989	175.7420571
DHX37	82.87587339	110.9958963	97.03812444	138.3560164	126.767845	128.7166233	151.1559825	129.8260396	133.0126006	79.30045105	87.77655455	88.49181324	136.9938305	137.3811953	161.5326153
MID1	53.67545601	11.73954306	25.438383	152.7873292	249.5230632	236.431276	150.9649842	216.4176744	220.1855783	160.3655853	166.1228819	165.5955218	134.4204213	125.335738	74.28025624
RNF167	135.299306	167.4050365	154.2021006	154.2975829	132.7673067	130.5861169	150.9649842	142.7636077	136.1980659	119.2999368	120.5560242	125.8541566	144.1511248	143.1283742	173.3871215
PACSIN2	73.54627945	62.76629342	69.73839633	146.2848481	140.4029851	138.3425266	150.8503853	143.2139661	144.1617292	120.4763923	111.9179361	111.1900218	102.9765776	105.259976	93.83819582
BUB3	139.9842969	88.8730029	102.8703391	133.0701286	144.844145	147.9286533	150.773986	178.6285118	188.7970908	147.6451606	143.0754067	148.747367	170.3275215	166.6288251	132.8742467
LDOC1L	63.40892847	62.13057809	63.82345525	94.26499965	85.04431645	88.30374036	150.773986	134.6571568	139.6554612	145.181957	150.808193	154.9874243	84.8018751	89.94728688	80.9060072
CSNK1G2	193.3366501	251.658508	218.6873674	136.0486844	130.8973446	126.3698122	150.773986	135.6806986	130.021371	170.2919283	174.5723655	173.0835906	152.1930286	158.7559772	179.6137308
FAM195B	182.0280513	236.231816	201.7284454	147.5853444	138.4161504	144.5874307	150.7357864	136.1719987	135.9261359	204.6297221	204.1832788	203.8158731	114.3558714	120.4152081	153.3901261
RAD21	135.2589181	67.17391969	127.3987311	162.520075	208.5786854	211.0936712	150.6593871	202.4156228	219.2920941	200.9165345	216.6311787	206.4678974	198.5546037	174.4623087	120.6205988
YIPF3	154.8874144	189.9517401	177.6550488	98.92161512	93.88767872	92.67915092	150.6593871	137.4821322	124.1554531	180.5123851	179.2120372	176.5936229	112.9083287	121.6748638	134.7901264
TPGS2	174.7986257	204.7850978	192.1735406	120.4007784	104.2893427	108.4306289	150.5447882	138.5466156	134.1003205	208.563495	216.3671323	209.7049272	133.777069	141.6325331	151.8334738
TBC1D9B	161.2283073	205.9717664	188.1199446	123.3373827	122.0539823	120.5226727	150.3155903	138.5466156	129.7105939	169.0787086	171.0266001	173.3955935	150.906324	159.3070766	157.1021432
CKS1B	229.2818388	226.7384671	209.4633684	160.2127431	118.4698884	131.540752	149.9335939	142.9683161	138.761977	158.0494386	144.621964	143.5603193	175.1928733	170.1322424	212.1836874
CLUH	150.4851385	167.9983708	156.683894	168.5610897	176.8672454	165.5894014	149.7425957	142.1904244	135.1880403	152.3509825	161.3700474	170.2365645	163.6527414	169.9354212	160.973817
JOSD1	54.2812738	63.99534305	60.76257664	153.0390381	124.4303925	126.0118241	149.7425957	134.6162152	126.7582114	91.21206262	92.37850541	85.83978887	108.8471673	109.7868635	116.9484959
TECR	224.7583993	266.5766277	251.9433998	134.4545278	137.598042	120.9999902	149.6661964	135.7216403	121.1253764	151.9098117	154.8820511	160.2134724	129.9973742	136.0034469	163.6480659
ZNF629	50.32326425	56.62104524	53.68946527	155.1366127	149.791753	140.2915731	149.5897971	145.1791664	137.6742572	127.8292389	135.7198295	138.2172702	141.296249	139.4675	128.6832596
SETD7	82.99703695	20.85146277	50.95949246	177.3289513	295.570879	276.7248296	149.5515975	225.0154253	259.5765763	139.9982001	165.7079519	156.0014337	184.4008531	162.9679508	120.8600838
BASP1	167.9326908	123.6678219	148.2871595	270.2095517	262.1453071	259.3425167	149.4369986	159.6315763	154.5339151	96.5061122	90.37929725	99.8799179	276.4806511	291.1772784	253.2952746
BCAS3	117.2863237	144.7735708	131.0386949	101.900171	94.04350889	87.30932887	149.3987989	136.2948237	128.894804	97.82962459	97.88575808	100.7769261	118.0953566	123.4462546	133.8321865
SYNCRIP	100.3961238	43.32357582	82.19782679	142.9857829	186.8064833	186.0659251	149.1925209	215.4911644	241.4198124	144.5275536	151.8142096	153.4738204	186.597097	166.1052807	110.0341655
DTYMK	85.37992025	109.3430365	87.93821507	146.7463145	121.8981522	131.1032109	149.0550022	132.0368899	134.6441804	115.8808631	112.1065407	114.9340562	154.3241331	155.8823878	214.8579362
SMARCD2	168.417345	216.90607	197.5507597	183.1602085	161.7127611	160.7764498	148.9786029	135.1893986	133.5176134	183.1961741	193.6214244	186.1877111	165.9848935	167.1799245	193.8630868
ATRAID	109.2087532	140.6626116	125.4960228	168.3513323	129.7675759	138.9391735	148.9786029	126.5507059	125.9424215	98.34432386	99.6963617	98.82690822	138.8434683	142.262361	184.4832586
RBM8A	101.8581641	57.17199853	73.5851762	154.8849037	186.879334	184.244561	148.9404032	173.1832695	180.0176376	232.7543605	218.3286196	209.4319247	141.0952014	138.7589437	113.2364787
UCK2	133.5626283	132.6525985	135.1336541	133.4896435	129.3390429	114.6755331	148.8258043	147.7584916	138.8396713	118.5278879	116.934817	111.8530279	141.5375061	148.0489041	140.7772508
VARS2	140.8728296	175.5421927	155.0707283	80.0014928	81.57709512	79.95068384	148.8258043	144.4012746	139.1116013	152.5348036	156.5040502	146.9533505	121.0306515	127.146493	118.8244615
NUP153	97.94054238	19.11384087	45.95454231	130.3013302	220.8503115	214.1564586	148.6348061	217.8096912	235.7244335	107.3147968	111.9179361	118.6780907	186.9742623	170.3684278	99.06695109
SUN1	120.1942491	88.61871677	103.7389668	143.0126319	139.5459192	149.4799353	148.6348061	148.2497917	147.0364174	139.7408505	137.3041077	134.4732358	151.0269525	152.4970632	126.9270365
CERK	72.81929811	77.17584086	75.36379485	123.0437223	105.3022388	103.6574538	148.5202072	137.4002488	133.2068363	159.5567722	157.9374447	158.8094595	99.35772089	102.8587574	102.2201699
XPO7	155.3316808	93.61967735	129.3841659	140.034076	136.0007827	140.88822	148.4438079	140.7574659	139.1116013	160.1082357	155.0706557	161.4614838	161.2803798	169.5024146	147.1635168
ZNF740	68.98245212	66.45344232	66.84297063	154.8010008	146.5193194	144.3885484	148.3674086	146.4892998	143.3070922	95.21936404	88.94590272	89.19381969	157.2594279	154.3078182	124.6519292
CAPNS1	211.8342865	268.1871065	237.4662713	112.4719466	103.0037438	103.935889	148.2910093	127.8608394	120.6980578	180.2182712	191.5090535	187.16272	128.8715077	135.688533	162.9296109
DDX54	283.7650519	351.8896247	309.5210082	121.7012746	113.6001955	114.237992	148.1382108	139.8976908	133.5953077	262.3863325	264.7253373	277.2145476	150.1423431	162.8892224	159.496993
TRA2B	79.72562089	50.30627298	77.1424135	139.2789492	151.2721396	149.0423942	147.9854122	171.7912527	181.0665103	148.6010307	147.073823	150.5413835	115.562157	103.8822276	104.1759639
UBE2E1	87.96474281	68.78439852	90.08910274	206.1076739	181.0357025	194.6659934	147.8326136	156.1515343	175.0452039	120.4763923	118.8963042	106.3539774	158.3852945	151.0012221	156.8227441
ZNF592	137.48025	126.5921124	132.4036813	101.648462	117.8076101	108.5897348	147.794414	152.0164255	148.9399272	131.2115484	134.7768068	133.732229	137.1948781	145.0965862	105.0939896
ZNF598	152.6660826	176.8136233	170.9128432	85.37128361	89.60234899	82.93391831	147.794414	136.3357654	132.8183649	122.8660674	125.0448123	125.5811541	129.4344409	134.1139634	127.1266073
CNIH4	69.26516709	75.3110759	70.60702405	167.7220599	140.2861125	144.9851953	147.7180147	145.9979998	146.7256403	115.3293996	103.3930108	98.43690464	123.6442702	117.935261	148.7999975
SLC39A14	94.38641136	36.786727	61.42438823	186.9358426	215.2793828	206.2807196	147.6798151	166.6326021	163.9737696	138.9320373	129.9862514	133.8492301	148.6545909	149.4660168	93.91802414
PABPC4	179.6855559	154.3516817	158.8761449	153.4585531	147.2595127	146.2182656	147.6798151	157.175076	146.8033346	193.4901594	187.2465908	196.6398071	182.4707962	190.0899117	147.2433451
ENO2	201.1718934	234.0703839	219.1009996	165.2469219	161.7906762	155.2077454	147.6034158	140.9212325	131.3033265	233.1220028	224.4016859	208.5349164	143.7490296	154.2290897	146.724461
GRWD1	134.3291898	177.1950525	147.2530789	151.6932343	138.3771929	137.3083386	147.6015058	132.6919566	134.0572001	121.7631404	124.3616867	121.6799482	143.1860964	151.316136	167.5995679
PRDX4	130.8566422	129.643546	133.9341206	170.0293919	127.196378	134.3251041	147.3360183	139.1607407	136.3923016	135.4761994	129.3449959	136.774257	145.4378294	143.5613809	186.4390526
FAM69B	195.8003091	242.3770642	213.4342379	154.8429522	151.3890122	156.1623805	147.1450201	133.4698484	127.1855299	165.6963991	163.8596274	161.149481	186.8536337	193.1996867	213.3811122
DGCR6L	84.87022555	112.9522043	88.48545053	104.5020024	94.33685919	100.4140813	147.0632728	131.603727	132.172337	107.6261898	109.5803714	105.4499491	93.13127691	96.88365949	132.6411479
FBRS	135.6627966	153.2073941	151.88576	164.4078921	165.3358127	156.4010392	146.9922215	143.8690329	135.0326518	137.2408826	142.0192213	149.839377	142.0200203	147.0254339	130.758796
MRPL9	105.7353979	140.2811825	119.7051714	137.0974717	104.1724701	108.6295112	146.9922215	134.2886818	132.5075878	150.4024781	146.4325676	138.5292731	142.1000373	143.5613809	176.500027
CDIP1	83.19897621	90.65300582	85.70460095	172.4206269	160.3102896	152.5427227	146.9540219	135.762582	135.4988174	65.55062783	71.21707563	64.70159461	131.7263835	133.1298574	156.064375
PIGS	233.5225633	299.6338247	261.4569414	143.5580012	132.3387737	131.9385166	146.4956262	132.6510149	131.2256322	169.777229	171.7432973	171.055572	180.2994822	188.5940707	199.9300395
GATAD2A	151.2121199	166.515035	163.7983686	165.7922913	176.6724577	159.9411441	146.4192269	156.2334176	150.1053413	111.763269	113.6908188	115.1680584	172.2575784	178.8317393	135.2690964
MLLT1	85.66263521	88.83062188	89.13774858	129.5881548	130.1961088	127.125565	146.4192269	143.3367911	143.6955635	120.6969777	115.6145852	123.5141351	142.0200203	153.6386261	134.4708131
DAP	171.3252704	206.1836715	182.7840886	211.1838043	176.8282878	183.0910436	146.1518294	137.5640155	127.6128484	121.7263762	127.7607178	118.5610896	183.9987579	185.7204812	211.2656616
HMG20A	126.6563055	72.38678539	95.83859093	103.5362791	102.4972957	101.1913133	146.0754301	146.3255332	148.1629844	107.2045041	96.86729355	106.2759767	125.3732795	131.3584667	108.6862642
NIPSNAP1	246.1235733	331.4619722	288.1362212	117.4222225	95.44598044	98.48651402	145.9226315	127.7380144	125.2820201	207.3502754	210.1809033	199.564834	135.7071259	145.4115001	163.0094393
ATP5J2	168.8402059	209.3529243	184.574289	143.3306242	124.8791834	124.1224423	145.9039137	134.5687228	122.4434597	177.9330065	180.6624062	172.2466429	127.0930407	125.2263055	165.5192418
CSNK2A1	184.1209499	78.59518128	119.733712	157.6331459	168.4621555	169.1903643	145.8859599	161.9918637	159.7561358	202.5753367	186.6272135	185.5660454	182.009593	181.0538506	132.0436329
IDH3B	158.845424	206.1412905	179.2682145	139.1530947	120.4177655	126.3698122	145.8844319	130.276398	128.7005683	141.3217125	134.8145277	139.387281	154.7664378	154.0322685	191.9871212
KDM5B	77.78700397	28.94623795	48.93269446	123.4632372	127.0405478	127.2051179	145.8080326	149.3142752	144.394812	98.71196619	91.73724996	101.3619315	118.3768233	116.7149696	80.86609304
MRTO4	79.36213022	111.5892306	87.77276217	171.0362277	139.390089	143.7919015	145.7316333	136.376707	133.0514477	90.07237139	87.1352991	86.03479066	145.8399246	150.0564803	198.4532155
WDR45	129.1066365	152.3173927	136.7505425	129.5269057	116.4752622	123.4446514	145.7236114	134.3701557	132.681623	115.6705717	114.5448202	106.1488355	122.7077905	118.7512817	151.805933
UHRF1	103.1909632	41.99959269	71.64110466	136.4681993	220.6555238	200.4733565	145.4260362	192.30303	198.975041	176.1006771	174.6855282	176.9446261	160.1545133	154.110997	67.81416193
TRAF7	232.230152	290.8609532	262.0360266	128.4554646	125.7549489	126.608471	145.4260362	133.9611484	126.8359056	112.0573829	115.5014224	113.062039	157.420266	163.0466793	166.5617997
POM121C	103.0403165	105.3130251	102.7640356	146.7140119	154.5788559	138.899397	145.4241262	135.8587949	138.5840571	169.92833	184.5333258	182.7451494	148.8355337	147.3446779	112.403071
PIP5K2B	116.3574031	138.3316554	125.7855654	153.5844075	127.9755289	128.517741	145.3114373	136.5404737	130.3321481	149.7407219	148.6203803	154.0904161	142.7035821	142.8528245	134.1115857
ARL6IP4	170.329306	230.9820788	193.5989173	158.720109	150.1244504	155.2622392	144.9978182	135.6901152	131.0830632	165.653385	164.2100546	159.9365698	152.3381849	160.1250655	193.6563314
ACTR2	188.2881685	54.50199415	127.1091886	213.9526027	280.1826495	271.394784	144.7384426	223.0092835	253.594117	177.4241895	190.3774262	198.7848268	222.2380103	195.6402695	125.8892682
RING1	63.93397055	72.09011823	66.88433385	111.4651108	104.5620455	103.1005833	144.6238437	135.8035236	126.7193642	82.86658167	83.62725459	80.30173797	106.4748057	108.3303866	128.8429162
TIMM17B	187.9246778	236.4861021	203.6725169	159.7093252	135.299547	137.427668	144.5856441	125.8956392	124.6993131	136.8732403	131.3064832	122.4221251	139.8889158	140.4122417	179.6137308
TMED4	180.210598	179.7802948	180.6332009	177.9582236	164.1281288	161.0946615	144.5092448	145.1791664	139.6166141	152.6083321	150.3555421	145.6663387	160.9989132	162.8104939	145.8463494
BOD1	73.14240093	64.41915327	70.64838727	162.93959	135.4164196	145.2636305	144.4710451	135.1075152	139.8108497	82.94011014	84.41939367	80.26273761	133.8172785	138.9557648	141.9746757
RPA1	161.309083	135.9583182	149.3626033	152.9970867	128.3261468	129.9496936	144.3564462	137.4411905	133.0514477	181.6520763	166.915021	186.1877111	129.0725553	134.5863343	126.1686674
DYNLL2	76.53498054	64.50391531	63.16164366	165.4147279	168.1797133	163.3221432	144.2418473	154.4729257	157.8359218	134.8144432	133.3056914	133.6542283	151.3084191	151.0799506	117.5072941
CENPB	58.40083476	79.25251093	66.26388549	123.2115282	122.4825153	121.5170841	144.2418473	129.9898063	123.2231218	127.3880681	128.8546241	129.9101939	111.460786	117.5022544	131.7566501
BZW1	86.1876773	38.1429197	71.80655755	191.1729432	212.3186096	215.1508701	143.9744498	182.6817372	209.3860739	136.2482483	132.0231805	134.3172344	175.5949685	155.9611162	114.7532169
POFUT1	81.09880788	92.98396202	88.31048409	151.235124	135.8449526	133.3306927	143.9744498	136.253882	129.9825238	108.6383092	109.7678443	105.6129706	135.2246116	146.3956061	136.4266071
HIF1AN	60.70294235	50.77246422	46.90589647	123.9247036	117.4569923	117.3405559	143.9362502	136.7042404	139.4612255	107.7192033	111.8047734	111.8140276	130.600517	128.8785196	115.8708135
ACIN1	164.8228262	111.1654204	132.9414032	122.078838	164.6345769	166.5838129	143.8980505	166.5507188	166.6542221	186.3578982	188.2273344	193.1687752	169.4027026	170.6046133	124.9712425
TIMM50	163.2073121	204.5308116	180.7159274	134.7062367	118.3530157	128.0006471	143.8598509	131.0133481	126.0201157	146.8731117	150.3178212	146.0563423	152.5147047	163.2435005	195.9785374
RN7SL2	113.096084	112.1261982	91.60713307	173.9606661	202.2589928	171.0065574	143.8231792	196.2285174	172.316581	152.7024485	127.7067769	123.9599092	150.5179	137.2312175	109.5264574
RBM12	39.06272709	18.79513559	28.34042683	139.4035451	164.3459015	158.2025151	143.7525099	174.038541	186.5983428	113.3816305	116.1868114	122.4962257	127.6881415	119.0736748	110.5151312
TAF7	150.7678535	47.93293576	108.6198273	231.1107624	269.6641129	262.2064218	143.7070523	175.3941198	195.1680214	176.3212625	163.9350692	164.1915089	151.1877906	134.6650628	135.5884097
DNAJA3	123.6676044	145.4940481	142.2481287	144.732643	137.0526364	138.7005147	143.630653	134.5343318	133.3622248	95.4031852	96.52780537	88.41381252	134.4204213	134.4288773	150.3167356
AP1M1	123.6272166	155.7926365	141.8758597	123.0856738	116.0155632	116.4654738	143.5160541	131.5865315	131.8083393	132.2777111	141.2270822	142.8583129	140.1703824	143.9943875	151.154933
TEX261	70.7393237	87.52613402	78.93923197	136.7618597	113.1432235	120.1491717	143.4996283	128.9904201	127.1579484	134.0181299	144.2028847	135.8635986	131.3773649	131.8599671	147.5874052
TBCA	259.4515646	290.7338102	264.7659994	276.0408089	205.8516574	215.1508701	143.3632555	140.9621742	143.540175	169.5566436	158.239212	151.5163924	173.0617688	172.533461	220.5257473
SEC16A	126.252427	133.8392671	131.9073226	134.7062367	144.337697	132.0578459	143.095858	144.9335163	138.5288942	137.5717607	143.8675458	151.0873885	161.4010084	170.6833418	126.5278948
UQCRQ	186.3091637	241.5294437	203.9206963	215.9662742	167.1278596	177.1643512	143.0576584	118.5261384	129.9436767	123.8587017	113.2758888	116.104067	147.7699815	147.0647982	210.5871209
USP7	81.13919573	15.46907299	39.91551154	142.9706804	198.5665969	198.1265454	142.8666602	178.5056868	181.2995931	87.82975316	86.22999729	83.53876772	159.6719991	163.4403217	80.66652222
NPC1	104.4025988	91.88205545	94.4322413	166.7991271	145.6232959	151.2698759	142.8666602	135.1484569	126.6805171	99.66783626	108.3721707	101.9859373	101.7300825	103.3311283	83.54034192
SHC2	98.78868728	114.8525693	104.1939623	118.2193008	116.5999263	124.5798715	142.7138616	134.4524485	134.6441804	133.1600527	137.1155031	126.9071663	118.4572423	127.4220427	139.3802551
FXR2	153.635391	192.2826963	174.4287173	130.2174272	115.5870302	114.3573214	142.5228634	127.6970727	123.6115932	138.3805738	135.6066668	137.2032609	114.637338	115.9670491	141.0965641
RAC3	159.0473633	181.3483927	173.8909954	170.3650038	162.2971243	163.5210255	142.4846638	131.8321815	119.8822679	135.255614	136.1347595	142.4683093	133.6162309	142.2229967	158.8982805
GEMIN4	82.99703695	110.7839912	93.10861812	106.7245924	98.28988108	101.0719839	142.4464641	125.8546975	126.0201157	116.1382127	121.1972797	120.78411	110.6968052	114.2350225	116.4296117
SEPN1	249.5161529	288.445235	276.5545183	144.816546	145.5064232	137.4674445	142.4082645	130.6858147	133.983779	180.9903201	197.883887	193.7147802	157.0181708	163.7552356	138.0231736
IP6K1	118.86145	154.3516817	137.7809005	128.2876586	117.65178	116.3461444	142.4082645	126.1822309	127.0689885	124.8145718	122.4797906	129.8321932	114.2352428	120.1002942	132.71459
BCL2L13	77.18118618	62.04581604	68.8284054	144.1033706	135.3385045	138.7800676	142.2554659	145.1791664	153.2908066	94.70466477	91.28459906	81.35474765	112.385605	114.4318437	101.2223159
CBX2	131.7451749	159.0559751	147.1289892	114.9051331	114.5741341	103.8961125	141.9498688	125.9365809	122.1354019	210.2546498	212.5950414	218.0510039	147.0060006	151.2374075	135.2690964
WDR5	68.45741004	80.48156057	74.70198326	132.4828077	114.496219	113.7208981	141.8734695	133.01949	134.6830275	115.1823427	111.125797	104.3649591	122.5988227	123.4068903	128.1244613
ELOB	190.2671733	235.5113386	201.8111718	146.872169	138.6888532	139.1380558	141.8734695	125.1586891	127.4574599	113.5647164	109.8055652	113.1010394	127.8260602	133.1692217	158.0600831
DRG1	81.04630367	100.7854605	86.00613886	118.1219734	88.34051417	91.36652775	141.8524597	126.5916476	128.3897912	112.609214	104.1285685	100.9539878	83.75642761	89.56624104	114.6031397
MAST2	117.0843845	140.2811825	131.2868742	120.2329724	125.6770338	114.9937448	141.7970702	128.4340228	124.0000646	127.1674827	138.0208049	130.9242032	131.0026122	137.341831	134.9896973
FAM136A	87.23776146	79.42203502	77.4733193	196.7524915	153.2979319	167.2202363	141.6442717	139.488274	140.0439326	113.4911879	105.3167771	101.9859373	142.8644202	143.6794736	145.2875512
HERPUD1	159.4916296	172.4483781	167.8519646	156.2693029	124.4303925	124.8583068	141.5678724	127.9017811	120.8534464	155.4024138	151.0722393	141.9223043	117.8540995	118.5650889	129.6012853
SERP1	149.798545	113.7082817	144.150837	194.1095476	185.3210322	181.0226677	141.185876	164.2989268	163.8960753	159.2626583	158.4655375	158.536457	163.6929509	155.8430235	156.8626583
MAFG	103.5544539	80.01536933	88.51730021	261.1480297	255.1719069	249.8359429	140.9948777	138.8332073	144.4725063	125.6233849	120.6691869	110.0590114	122.8400799	125.7687447	130.9184527
NUP98	94.06330854	41.40625838	60.55576052	164.9532615	183.1004523	185.0798666	140.8802788	145.5476414	137.9850343	116.7264405	112.6723543	113.8810466	139.9693349	141.5144404	102.2999982
PPDPF	143.5384279	181.0517255	157.8834275	145.0263034	142.7404377	139.0187264	140.8038795	128.1064894	123.844676	115.4396923	124.7053242	121.1741136	141.9396013	153.6779904	167.0407697
PFKL	191.8019117	257.6766131	216.4537533	89.69228716	87.45968412	82.4566008	140.7274803	129.0481479	121.7080834	145.0349	150.0160539	147.1093519	133.4956023	149.8990234	156.6630874
STK11	128.1506561	172.4483781	142.8685771	149.4312099	136.1566129	134.0864454	140.7274803	123.8894973	119.4549494	121.7263762	122.706116	122.2271233	144.4325914	147.1041624	160.1356196
MRPL4	142.0036895	177.4917197	155.0707283	115.1148905	113.561238	107.1180058	140.536482	132.6510149	123.4562046	142.976103	148.0545667	141.8833039	135.3854497	145.5295928	159.8163063
GRINA	123.9503194	136.8907007	135.2577438	199.7729988	209.7084542	199.4391685	140.4600828	136.9908321	127.496307	160.4023495	171.2152046	161.5004842	143.7892391	152.0246923	155.3060059
DUSP16	112.6013328	38.43958685	71.47565176	119.6037	154.3887431	155.1281925	140.4218831	156.6428343	166.615375	87.38858236	77.85595556	78.81972435	136.9536209	133.6022283	101.3420583
VCL	183.5627897	82.17680144	135.7954657	131.5598749	157.6222191	139.5358204	140.4218831	150.9928837	147.8910545	132.09389	124.8939287	123.4751347	130.1582123	129.6264401	92.68068511
TFDP1	130.371988	86.5420467	111.5979794	157.6117506	158.3234549	158.4296387	140.3454838	158.8127429	152.5915582	167.5346108	152.6187966	159.3944648	149.820667	156.2366659	119.3034314
MLLT6	96.80968251	106.58827	99.60264435	124.470073	144.1429092	138.382303	140.3072842	136.9089488	142.0251366	148.1230956	148.6958221	147.3823544	169.6841692	179.5796598	137.4244612
TRABD	135.5820209	153.9278715	138.3599856	123.5471402	123.9629019	128.0802	140.2690845	128.4340228	134.4499447	187.8284675	188.7177062	187.6307243	111.7422527	117.2267047	114.3141611
NDRG1	338.6925313	414.6559182	398.1623981	116.0378233	100.9779516	103.0210304	140.2690845	128.6796728	120.1153508	396.6860764	379.1705743	398.1936594	197.7906229	222.526045	201.3270352
LAS1L	86.75310723	107.3935095	94.72178387	120.8622448	107.4059462	113.0049218	140.1926853	128.7615562	132.0802693	103.1604384	104.8264053	102.180939	124.8907653	130.9648243	143.8107272
KDM4B	84.08750896	102.7315971	90.62682466	112.5138981	103.5881069	98.72517278	140.1544856	130.0716897	126.7582114	107.9397887	110.8240298	113.6080441	112.7877002	113.329645	114.3939895
CLN6	52.12738962	63.18501791	57.90603236	91.36447358	93.33915651	84.4406506	140.0372127	125.1562326	125.1254662	140.4742969	148.2952261	145.6803788	96.12206092	99.57538618	102.3730412
BAZ1B	126.6966934	20.7243197	60.43167085	151.1092696	277.1439612	250.6314721	139.8488885	208.2702818	233.7820766	179.1888727	183.0972908	175.735615	184.5616912	168.0065735	100.8231742
PSMF1	144.5077363	161.7683605	154.6984592	132.5247592	118.7425912	117.0223442	139.7342896	125.5271641	124.8547016	159.0053087	164.6517665	167.6625408	131.8068025	134.1139634	144.1300404
RNF157	158.5223212	193.8084131	166.9419737	124.0925095	123.3395813	112.6469337	139.6196906	125.8546975	113.1617131	119.7043434	121.9139769	114.7780548	140.9745728	142.9709173	145.0879803
ENTPD6	105.8565615	137.1873679	116.7683825	145.1941094	131.0531748	130.2281288	139.5432914	119.1402634	117.9010639	118.4543594	117.9910024	112.4770337	126.1774699	129.272162	157.7407698
AKAP1	138.6111099	110.360181	122.7246868	123.8827521	128.6767647	128.9155056	139.4286924	144.0327996	143.7732578	118.4543594	116.2181197	126.6731641	161.7226845	164.4637919	134.191414
AATF	99.95993501	99.7225445	98.77537986	143.2643408	125.1705858	131.6600813	139.3904928	132.5281899	133.5564605	134.7041505	129.2695541	126.2441602	126.2176794	128.5636057	138.9411993
GTF3C5	137.48025	176.177908	155.4843605	108.9060699	102.7699985	105.0496299	139.3904928	125.8956392	123.2231218	169.8875217	171.3283673	171.6405774	129.1931838	134.4682416	153.2703836
DNAJB6	162.4803307	118.20067	147.7494375	182.9924025	160.6609075	163.6403549	139.3522931	139.7339241	136.7419258	166.7625619	146.9229394	149.0203695	168.8397693	164.306335	167.9188812
INTS3	86.8326713	88.69585023	86.64850973	145.9492362	155.271521	153.1751684	139.152891	141.1951323	136.6949208	154.6612469	148.0870066	161.0991705	147.6320628	147.5241788	118.2971954
RAB11A	144.1038578	115.7425708	130.5423362	113.7724428	117.6907375	119.4089318	138.9320971	159.2221596	169.4512161	151.7627547	147.8282412	152.2573992	124.9309748	120.9269432	104.5751055
MPST	160.2589988	191.0112657	172.898278	90.19570505	89.13485847	86.99111719	138.9320971	129.7032146	126.9135999	134.0423943	132.4003895	137.9832681	100.9258921	108.2910224	117.46738
SIGMAR1	152.1410405	197.2836569	166.1147092	143.6419042	136.0786978	132.1373989	138.9320971	130.9724064	123.8058289	132.9762316	136.7005731	124.9961487	164.6177699	164.1882423	193.3442027
CANT1	110.9454309	157.6997824	127.3573679	165.7083883	138.5719806	137.6265503	138.8938974	116.9703548	114.0163501	143.454038	147.3755903	150.1513799	124.9309748	121.2812214	156.1442033
MDH1	120.3558005	90.6106248	112.8388762	153.5844075	141.1042209	148.3264179	138.7410989	135.9263486	146.4925575	120.9175631	110.5977043	115.129058	134.3400022	127.3433142	139.6995684
AP2S1	213.5305763	262.9318598	219.1837261	146.4526541	126.3003545	130.9043286	138.7410989	122.6203055	129.8659824	155.9538773	161.8604192	150.4633828	136.7927829	139.7430496	171.9502116
SF3B4	79.8063966	89.8477664	84.50506745	135.2935576	117.65178	114.3970979	138.7410989	125.7728142	122.990039	109.9618216	113.6530979	114.3100505	114.7981761	119.5098306	133.2334741
SIN3B	63.24737706	64.97010655	64.65071973	110.2904691	116.6778414	114.2777685	138.7028992	129.3347396	127.3797656	110.7338705	112.4083079	112.6720355	110.6968052	113.8807444	99.10686526
TOMM6	171.8923159	198.7432593	181.0989509	126.6939215	103.9430102	107.4119538	138.6131301	130.9642181	135.9809104	116.078287	113.9431717	106.5419591	132.3009775	134.2045012	164.4084307
LMF2	92.20546732	102.9858832	97.90675215	119.1422336	128.0144864	122.3921663	138.511901	127.8608394	123.3008161	132.3880038	132.7398777	128.9351849	94.6532072	99.78834671	96.75192967
GLOD4	56.50260569	51.15389342	52.03493629	192.263682	151.5058849	158.7478504	138.3209028	132.2006566	135.2268875	90.84442028	82.30702279	82.75876055	124.166994	120.7694863	146.1257486
L3MBTL2	72.09231676	90.01729049	82.14736365	141.7540871	130.2350664	126.9664591	138.3209028	128.3111978	125.8647272	122.167547	123.2719296	122.5781265	105.8314534	103.5673137	117.46738
GPT2	52.18110547	61.62200583	57.37079224	145.4038668	128.3651043	128.517741	138.2445035	122.9478388	125.4374087	100.0354786	95.69794538	89.54482292	120.6285563	128.6816984	134.2712423
SAFB	112.2414771	72.56520949	83.17151709	144.4712852	159.3550506	148.4739886	138.1681043	156.4323941	154.9313213	176.3609679	169.9866346	193.5412286	142.3497384	149.5077428	93.4007366
USP1	61.95496578	38.18530072	63.20300688	155.849788	160.7777801	170.5216824	138.0535053	162.9478517	184.4462113	87.79298893	91.4732036	86.69779675	147.8504005	137.656745	114.5536461
TMEM164	269.1850371	283.7409415	284.8685264	128.5393676	108.4967574	111.5729692	137.7861078	129.1709729	119.5714908	158.6744306	160.313862	173.8245974	181.0232535	192.9635012	165.9630873
COL6A1	193.90208	233.1803824	226.2568375	122.7500618	120.3398504	114.7153096	137.7479082	129.0072062	121.7857777	84.96214297	93.28380722	89.70082435	145.4378294	156.2366659	144.6888387
SALL2	66.43801741	74.71774159	71.14474596	120.5685843	110.405677	106.9191235	137.7097086	124.7902141	126.4862814	80.03573572	78.12000192	80.06773582	112.2649764	114.4318437	110.4025732
SMG9	20.7593562	21.40241605	19.89571094	113.185122	113.3274927	115.6301681	137.5187103	127.6151894	122.5627205	52.4625608	57.18489759	52.76748493	93.84901682	96.48175061	109.0854059
FZR1	67.32655016	79.93060728	74.32971424	138.3979679	130.351939	135.7172802	137.5187103	122.1290054	121.1642235	109.1530084	114.8224461	109.7080082	108.6863292	117.1479763	132.2356201
GADD45A	69.06322782	41.27911532	57.41215546	165.9181458	173.2831514	186.6311485	137.3659118	163.6029184	165.0226423	60.36687095	55.0348058	49.56945554	138.8032588	141.3963477	124.9712425
MESDC1	78.91786384	102.3077868	86.32504932	102.5713948	94.82265975	95.86126769	137.3659118	133.142315	133.401072	100.6604706	97.65943263	106.6269799	118.5778709	131.7521091	121.418882
SMARCE1	124.3945858	60.68114714	98.27116216	139.3628522	176.9451605	181.6988676	137.3578899	174.3243139	186.0777911	141.0787009	149.9028912	155.0385148	164.7979085	153.2398664	126.8831309
TOP3A	62.43962001	74.20916933	65.1057152	128.3296101	110.4835921	106.4020295	137.3277121	122.2108888	120.6592107	95.4031852	95.13213175	92.04084586	119.1005946	124.4697248	126.6077232
CAPN2	164.9439897	76.70964962	118.1747321	156.4371089	160.3492471	164.5552135	137.2895125	147.8813167	149.6780228	238.7469305	227.9851722	234.6651566	163.9744176	174.0686663	130.000427
ATG9A	146.6317335	179.7633424	160.0769193	116.3310642	114.0221057	110.9047247	137.2092932	127.8145753	119.8562404	146.9532577	156.5889222	162.1560802	114.2211695	120.1691816	122.9671524
INTS11	105.2911315	132.7797416	121.4424268	90.4054625	88.23883498	87.54798763	137.1367139	121.678647	118.7945481	123.270474	128.1756478	125.0351491	119.9449945	128.8785196	137.7437745
UBE2Q1	83.64324259	92.68729487	87.40049315	150.3960942	122.8331332	124.3809892	137.0985143	126.3459976	129.2055811	128.638052	124.6676033	123.1631319	125.1320224	129.5870759	130.4793969
DHX8	85.94535018	84.21109049	80.5341979	122.162741	108.3019696	101.3106427	137.0985143	124.7492724	121.2807649	125.8072061	130.0239723	126.9071663	110.1740814	113.8807444	95.79398978
PREB	118.2556322	152.3597737	135.5059231	147.9209563	133.3516698	135.4786215	137.0603146	126.5097643	120.6203636	117.755839	119.9902106	121.759119	139.205354	139.9398708	171.0321859
UQCRC2	153.2719003	92.81443794	120.739252	153.1648926	135.1826743	139.9733614	137.022115	137.0317738	134.2168619	107.4250895	109.8055652	109.6300075	150.4238097	146.3168776	152.7115854
ATP6V1F	191.2364817	263.8218613	239.2448899	196.542734	174.4518777	181.4999853	136.9457157	116.1105797	112.3847703	139.7408505	138.0208049	134.9412401	167.2715981	171.8249047	215.2171637
MATR3	123.9139703	67.31843898	134.4329611	203.8817278	213.9419704	250.5614655	136.8150729	192.7144938	197.1919573	165.3177275	166.7916736	187.4263624	203.3314945	179.0706802	145.2125125
KXD1	160.6628774	191.1384087	186.9617743	131.2662145	125.4822461	123.9434482	136.7929171	125.8546975	118.8333952	137.7188176	136.323364	141.8443035	147.0060006	153.0481625	168.7570787
PIH1D1	127.3025112	168.0407518	141.9585861	102.3616374	92.44624963	91.72451589	136.7165179	119.8362718	116.7356498	139.3732081	132.1363432	130.6122003	124.8907653	132.6968508	145.1678087
HIRA	66.51879311	68.82677955	73.21290718	94.81036903	94.78370221	93.59400949	136.6783182	135.1075152	124.9323959	138.2335169	139.6805249	141.9613046	103.3384633	107.2675522	89.40772379
MAN2B1	216.2531215	269.0232841	242.6263335	112.7760949	113.106993	106.2707672	136.595043	123.0530589	117.2348355	131.6931598	136.8367456	133.9966514	128.6893586	131.3643713	153.0580403
SSR4	170.1136348	217.7960715	185.5967879	168.6869442	153.4927196	151.5483112	136.5637193	124.298914	127.6905427	168.674302	164.9535338	167.7405415	132.5707834	138.3653013	166.5218856
AIMP2	34.3700625	43.10149926	39.5018793	129.0427855	101.5623147	107.7942056	136.5637193	126.8372976	124.3108417	50.40376374	47.03797315	50.81746701	133.4553928	136.9088244	164.406435
SDHC	137.5610257	139.6030861	132.6104974	161.3873848	162.4139969	159.9809206	136.48732	143.9918579	151.8923097	122.6087178	120.2542569	116.4160699	146.4028579	147.3009836	150.3566498
PEX26	101.0100192	89.2544321	91.57817882	122.246644	120.885256	116.0677092	136.48732	131.6684148	131.3810208	136.836476	139.4541995	135.8772487	109.3296815	114.9042146	104.3356205
LZTR1	71.64805039	86.1606175	76.93559738	101.564559	103.159574	107.5448072	136.4491204	131.4227648	120.2315037	112.3147325	113.9548652	114.8950559	95.45739757	105.929168	100.1446335
PITRM1	118.0940808	132.9916467	128.6396279	92.29327958	76.55157207	82.69525955	136.4491204	123.3981972	120.3095865	130.843906	134.0601095	134.2392337	110.1740814	112.6998172	112.318453
SLC35E2B	81.96553119	77.03301681	77.19908112	110.4918363	110.4722944	112.7117693	136.4223806	134.5056727	127.8599162	149.5131513	149.8361252	145.593408	125.4677719	127.5779251	106.2032042
SRPRA	86.63194367	94.21301166	92.7363491	161.8068997	147.2984702	149.0026177	136.3727211	125.3633975	121.863472	105.4765851	113.6908188	107.835991	147.9308196	151.3555002	151.9532163
ANAPC1	122.555323	27.5591071	58.94673109	84.02212367	115.7525998	116.3409735	136.2692001	162.5904309	161.0396453	139.7812911	129.9715402	134.7520884	186.1262436	184.5509696	117.9335774
PRPF31	119.9923099	148.2488146	135.5886496	130.888651	123.5733265	124.8980832	136.1817229	128.9253229	121.863472	166.0640414	166.5378119	159.082462	141.0952014	155.9611162	147.4030018
SETD5	115.7919732	32.7181489	58.73577865	109.1158274	164.5566618	154.213334	136.0289243	171.381836	161.0990814	150.1451285	150.1292166	153.4664104	189.2259954	192.097488	91.40343191
WIZ	130.6143151	152.0207255	145.0194647	123.1695768	128.2092741	127.2448943	136.0289243	136.9908321	135.4211231	125.476328	132.0986223	129.6371914	140.4116396	138.8770364	123.0154485
ATP13A1	102.140879	121.7182949	111.8461588	118.5129613	125.404331	119.6078141	136.0289243	122.9068972	123.0288861	123.9689944	126.2896023	124.1771412	126.7404032	131.2403739	135.5085814
KIAA0195	143.6192036	153.1650131	156.5184411	145.4877698	160.3492471	152.4233933	135.9907247	131.0133481	121.7469306	113.1235456	120.5183033	127.0631677	129.4344409	134.2320561	112.9570796
NAT10	66.76112023	71.07297371	68.29068348	193.2285663	164.8293646	171.1183293	135.9907247	125.4862225	121.9800134	82.09453278	87.85199637	83.22676485	131.7263835	134.4682416	135.7081522
NCKAP1	90.2668504	52.21341897	100.5126353	169.525974	208.3838977	205.8034021	135.952525	173.5926862	203.4424618	153.3068525	160.2384202	161.5394845	166.1055221	143.1677385	104.3755347
MRC2	114.7822769	144.9430949	131.3282375	88.6015484	88.9790283	78.319849	135.8761257	125.8137558	117.5514397	115.4764565	120.0656524	109.2400039	151.9517714	158.559156	150.1969931
DYNLRB1	119.6288192	150.0711985	132.2382284	135.3355091	121.3917041	119.0509436	135.8379261	127.9017811	113.8998087	132.3512396	131.8722968	129.052186	118.6180804	124.5484533	151.4343322
RAE1	55.41213367	64.71582042	59.14941089	151.2770755	119.9113175	120.3635668	135.6087283	127.9836644	124.7381602	67.13148986	62.72987117	67.50962041	99.96086367	101.5991017	128.3639463
AAAS	89.82258402	107.6054146	100.2230927	127.9939982	116.8726291	116.3461444	135.41773	123.4800806	122.2130962	68.63882342	70.95302927	74.88068815	122.1163085	128.8391553	149.1991391
HK1	253.1106718	303.99907	273.7004558	101.4806561	92.56312226	93.71333887	135.3795304	125.7318725	119.9599622	206.026763	209.1624387	196.0548017	116.2457188	121.1631287	111.6798264
SKP1	232.968442	198.0816915	220.4858404	203.4815106	182.4109038	196.1345403	135.3436227	137.0952334	144.9806269	204.8278813	188.8919768	189.768724	153.7740668	145.9763769	149.5715382
MAD2L1	133.5222405	108.5801781	155.567087	171.1620821	155.6353844	166.0269425	135.3031311	144.8925747	159.7394315	138.4173381	138.6243395	133.0302225	145.5182484	139.6249569	129.8008561
IRF2BP1	84.57216319	113.7082817	96.37631285	98.46014872	99.22486212	96.25903229	135.1885322	120.5732219	119.3772551	104.8148289	105.1658935	110.4880154	98.11122581	104.1577773	120.5407705
RPRD1A	160.8244288	49.96722481	107.9166525	187.732921	260.0805573	264.7521152	135.0739333	199.3040558	222.5941009	130.1821498	135.8329922	142.4293089	220.669839	195.3647198	129.8806845
SUPT4H1	114.5399498	141.8492803	128.2673589	137.6428411	116.9895017	117.2212265	134.9211347	127.6151894	124.7381602	126.6527834	120.5937451	122.0711218	118.5376613	120.887579	148.9995683
SLC25A38	83.23936406	102.4773109	89.79956017	125.3510543	97.82239057	101.1913133	134.9211347	122.6203055	120.0765036	84.92537874	88.00288	82.21275554	120.2666707	121.1237644	147.3231734
NDUFS7	167.0845459	197.1565138	175.0078024	139.3628522	141.2990086	141.325761	134.8447354	123.9713806	120.736905	146.9834044	153.4109357	143.63832	140.5724776	141.5144404	175.6223146
DCTD	80.21027512	101.1211182	93.97724583	94.43280561	73.12330828	81.74062452	134.4245394	129.1709729	122.7569562	130.9174345	132.0609014	125.4251527	87.25465574	81.5627039	92.28154348
CPNE1	250.6478205	301.5778422	274.5343384	165.7180372	152.7396703	141.1479603	134.1002244	127.1283929	118.0381943	200.1172801	202.016967	200.4657423	193.3044468	195.2686711	206.5158763
PAF1	84.93565387	101.2058803	91.28863625	131.8535353	123.0668785	121.9944017	133.8897444	125.7728142	124.4273831	117.9396602	112.4837497	117.1180763	116.2457188	120.1396584	127.805148
UQCRH	213.2874414	202.7084277	232.4183034	164.3671992	136.8944688	138.8974082	133.8129631	115.4964547	130.1755941	185.4009252	173.862458	178.4617401	145.9243646	138.2452403	177.7792759
PPP1R9B	152.827634	192.8760306	168.7619555	134.2867218	126.2224394	124.5003186	133.7369458	122.4565388	121.0865292	149.1892584	147.8282412	153.7004125	145.558458	150.7256724	143.531328
YWHAH	115.2265433	98.83254304	109.0748227	128.3296101	111.6523183	115.6699446	133.2403505	128.7615562	130.5652309	122.7557747	118.0287233	128.8571842	99.47834945	104.6695124	92.24162932
CUEDC2	163.9746813	206.7770058	181.9154609	100.5577233	85.70659468	92.28138632	133.2403505	116.0286964	111.4135918	86.9841758	92.18990087	89.54482292	123.0009179	132.2244799	152.2326154
ANAPC11	179.9206132	218.9323067	200.6943648	151.4213887	126.0038876	129.3928232	133.2170487	118.9183596	126.145592	157.2579047	150.9432338	154.4882197	120.255412	123.6430757	151.7771948
TMEM129	91.76120094	111.5468496	96.74858187	95.27183542	88.66736795	92.04272757	133.1257515	127.287656	120.736905	96.24876257	96.30147991	90.79283439	122.5988227	134.2320561	129.7210278
SUPT16H	95.75959835	23.18241897	51.16630858	135.5452665	235.2256449	229.072631	133.0875519	208.8434652	214.8635204	117.8293675	116.2558406	119.9651025	211.6226973	198.7106802	112.9171654
SETDB1	84.93565387	89.2544321	85.04278936	97.78892487	88.7063255	87.90597577	133.0875519	126.4688226	122.2130962	109.8147646	109.0511471	110.9560197	121.9554704	118.4076319	116.9484959
KIAA0368	78.06971894	15.93526423	36.44100069	110.2065661	159.2973935	160.8560027	133.0493523	167.0420188	167.7807891	165.9169845	155.2969811	160.3694738	155.0076949	155.764295	88.72918303
PPP2R5D	187.8439021	241.4446817	222.2859679	96.32062269	86.56366063	85.59894111	133.0493523	115.332688	112.3459232	153.6377306	157.5225147	153.3494093	101.2073588	100.65436	110.0433458
MSL1	131.2605207	71.62392699	85.49778483	126.9032594	129.6896608	135.001304	132.972953	136.9498904	139.033907	113.2706025	107.2028225	115.7530638	143.7892391	142.3017252	113.4759637
TXNRD2	87.23776146	110.2330379	90.91636723	120.6944388	111.6133608	113.4424628	132.858354	119.5496801	119.5714908	113.8955945	113.2381679	110.0200111	87.09381767	84.43629337	99.02703693
UQCC2	83.64324259	113.6235197	100.4712721	114.0661033	87.2648964	88.74128142	132.7819548	116.0286964	122.6792619	75.4769708	70.04772746	72.38466522	98.99583522	97.89886322	132.6746758
CD99L2	105.4930708	137.1873679	117.1820147	143.1804378	114.8857944	114.317545	132.7437551	120.4503969	120.6203636	118.6014164	119.2735133	118.0150846	119.3418517	125.8868374	133.3133024
NKIRAS2	149.8793207	181.5179167	164.5429067	105.5919021	98.32883863	96.97500856	132.6673558	123.5619639	121.9023191	154.2627226	156.6549338	151.3213906	118.5376613	127.6582282	131.2776802
PSMD11	100.8888556	67.59772991	85.58051128	155.1366127	156.4534928	148.5650767	132.5145573	141.6991243	151.5426854	125.6969134	123.3473715	124.6451455	139.7682873	136.8300959	110.9214573
IMMT	153.7565546	97.26444523	122.9315029	82.64443672	74.21411949	77.76297856	132.438158	134.6162152	131.3033265	152.902446	148.6581012	158.3414552	131.9676406	138.2472085	126.567809
PLAGL2	54.24088595	50.13674889	51.04221891	122.4983529	121.8981522	119.3293789	132.3617587	138.5056739	135.4599703	96.2855268	97.28222354	100.1529204	99.75981608	101.5991017	80.82617887
OXA1L	148.7484609	152.8259649	152.0925761	119.7295545	112.3925117	109.7034756	132.3617587	127.656131	108.5389036	121.7631404	122.5929533	120.9011111	137.3557161	141.7506258	141.3360491
NELFB	221.285044	296.4976291	250.867956	123.9247036	114.0287285	113.1640276	132.3235591	124.544564	126.4862814	160.5861707	160.6910711	157.4834473	148.815429	160.2124541	179.6137308
HES1	119.4672678	129.3892598	115.9824812	174.4762499	142.0002444	152.6222756	132.2853594	135.9263486	131.4198679	54.48459363	51.18727311	55.06850608	130.3190503	135.0587052	136.9854054
OTUB1	110.2992253	134.7292686	128.7223543	192.9739207	185.2820747	188.2679499	132.2853594	125.3224558	120.4373935	128.8586374	134.4750395	133.9662311	127.3033364	131.8308375	154.4678085
KAT7	87.72241569	76.41298246	81.56827851	128.7910765	112.8989597	107.396441	132.2853594	125.1996308	116.3471784	110.5500493	113.2758888	115.0510573	116.1652997	116.3606915	107.1296119
EPRS	127.3025112	46.87341021	88.26912087	128.665222	212.7861001	210.0992597	132.2089601	202.4565645	219.1755527	176.6153764	185.5868708	182.4046763	204.9881267	201.0331703	130.7987102
MXRA7	245.4369798	292.8104802	263.0701072	168.0157203	140.7925605	143.8714545	132.2089601	120.0000385	122.8346504	216.3207483	210.1431824	211.0699397	155.329371	160.4880038	168.3978512
PCMT1	130.0488851	89.76300436	119.9119875	188.6558538	195.2552057	198.52431	132.1325609	150.0512252	161.9537184	116.9837901	111.1635179	119.6921	139.205354	132.6968508	130.3197403
CDKN2A	220.5580627	296.6671532	243.133033	99.93264604	83.99246279	84.20676502	132.0943612	119.4268551	124.8158545	163.4905451	160.0498156	169.8465609	126.9012413	133.0904932	154.5476368
MRPL2	76.49459269	100.5701649	83.88461908	85.4132351	75.38284578	73.62622676	132.0561616	116.3152881	108.3058208	63.67565193	63.48428934	62.59557525	106.1531296	108.6453006	140.4579375
STUB1	143.0133858	173.2112365	154.3261902	143.8097102	135.7670375	140.3313495	132.0179619	122.2108888	121.319612	90.47677795	91.0205527	86.34679353	125.8155842	125.7293804	149.438624
PEX19	88.93889781	97.32674534	93.99668655	122.9279362	97.86641259	99.65952182	131.9843462	116.5560251	114.5011624	108.494561	108.9225188	104.4839102	104.985043	103.3354583	114.0990238
ESPL1	103.4736782	124.6425854	116.8511089	89.5244812	89.5244339	86.7922349	131.9797623	117.7482466	116.1140955	162.1302685	172.1959482	158.8484598	110.6968052	119.9822015	104.455363
CDC20	200.0006457	240.4699182	218.0255558	97.95673083	80.95377443	85.79782341	131.9415626	115.087038	113.7832673	112.719139	117.3874679	123.2801329	137.1546685	135.688533	164.9652332
YY1	121.5674361	26.95432992	62.41710562	148.0887622	224.9408535	212.3665179	131.8269637	179.6929952	196.0226585	116.6896762	111.3521225	116.8840742	174.9114067	166.9831033	108.1673801
PTPN1	67.69004084	57.38390364	66.84297063	146.1170422	122.8720907	121.5170841	131.7123648	123.3163139	119.1830195	93.52820931	88.38008909	88.88181682	118.7387089	117.8565326	105.7725304
EMD	104.9276409	124.2187752	112.5906968	134.1608673	126.3782696	125.6538359	131.7123648	114.6776213	112.7732417	89.30032249	87.88971727	95.9408817	144.1511248	153.284348	176.3407695
FAM60A	196.1076606	77.82257525	132.0727755	177.1678575	156.7530763	161.5162919	131.6825691	146.8532713	160.0288427	124.5075904	105.6551336	105.5337999	157.441577	150.7469291	151.1118257
FEM1B	78.35243391	21.1057489	48.84996801	146.5785086	209.7474117	210.0992597	131.5595662	202.0471478	225.5076362	131.4321338	149.6011239	144.067324	171.4131785	146.1594206	92.44120013
MEA1	68.21508292	84.88918684	75.90151677	109.6192452	94.93953238	99.52070197	131.5595662	117.2160049	117.1629683	93.85908741	91.05827361	91.18283797	90.5920458	91.44312797	111.3605131
PPP1R14B	159.4512418	192.4098394	173.7255425	220.7067927	186.1001831	201.0700034	131.5213666	127.1238893	126.09781	108.454488	109.0134261	109.7470086	159.5513705	163.1254078	208.3519278
PLOD1	162.7226578	200.5046146	180.7986538	138.1043074	129.3390429	128.7961763	131.5213666	113.6131378	106.7907824	127.7189462	132.5512732	138.1002691	133.0130881	140.0579636	149.7579373
NSFL1C	72.57697099	87.55919122	76.06696967	133.363789	113.1716625	116.743909	131.4067677	113.6540795	110.9474262	117.755839	122.6306742	119.8481014	108.7667483	107.89738	135.3090106
BRD4	125.9293242	106.2916029	112.4666071	125.0154423	155.4405967	143.7123486	131.2921687	148.20885	138.0238814	112.3147325	119.2735133	113.9200469	138.8434683	139.8217781	94.75622155
TCEA1	84.6529389	40.43149488	69.69703311	174.7279588	201.8000729	211.0141183	131.2539691	160.9826515	193.2645117	146.7995832	147.0361021	130.6512007	146.1616007	130.8073673	115.9506418
AGAP3	267.852238	319.2986189	287.557136	180.6850705	181.6590232	181.6193146	131.1393702	125.4862225	119.1053252	161.0641057	159.1822347	162.9824978	185.2854625	190.2473687	195.61931
USF2	173.1427238	220.6356	193.6626166	132.6506137	117.5349073	119.9658022	131.0247712	120.2866302	112.1516875	164.5199437	168.8010664	170.7045688	119.7439469	128.2093275	142.9725297
NISCH	105.5334587	108.5801781	108.5371008	96.82404058	116.3661811	113.6413451	130.9101723	139.2835657	127.768237	182.5344179	192.5652389	188.8397354	124.5690892	134.7831555	90.12617871
GNA11	87.39931287	114.9797124	94.4322413	141.9638446	133.078967	127.7619883	130.9101723	120.6960469	118.0564524	128.4174666	127.0440205	129.8711935	105.2283106	100.0245321	117.1081525
RTN4	118.9018378	52.89151532	90.7095511	131.6437779	150.1034133	147.1729006	130.8719727	144.3603329	157.5639918	146.284884	138.1339677	141.3372989	128.0673173	126.3985725	98.26866784
ARPC3	156.139034	111.7587547	134.2236632	169.1903621	155.1289364	155.1281925	130.8719727	122.2927721	132.0406452	126.0638204	119.9147688	119.3020964	133.8972954	130.6892746	160.5746754
FBXW5	156.3009893	205.5903372	178.1927707	105.5499506	104.2893427	102.3448306	130.833773	115.7421047	109.7043178	152.8656817	158.2769329	156.0014337	127.7054316	131.5946521	150.6360489
NUP93	111.5512487	134.8564116	126.075108	129.0427855	108.0292668	106.1235943	130.7955734	121.3511137	118.0176053	92.05763998	90.45473907	94.61486951	119.7439469	125.1389168	131.6768218
CST3	169.9924713	203.386524	175.3800714	105.3821447	103.6270645	101.3106427	130.7955734	121.1054636	114.5990572	146.4687051	145.8667539	152.1793985	109.289472	119.5098306	131.6369076
PFN2	136.3493901	94.6792029	121.7319694	118.2612523	101.2896119	101.8675131	130.5281759	133.01949	133.4399191	117.3514324	113.6530979	125.9711577	125.0516034	126.8315791	122.4167361
NFYC	65.34754539	77.17584086	73.54381298	140.0760275	127.2353356	128.1199764	130.4899763	125.5681058	114.9875285	76.87401166	79.89288463	76.2457007	119.8243659	122.855791	131.0781093
RANBP3	127.5448383	153.4192992	144.1094738	118.2612523	115.0416246	108.1124173	130.4517766	124.3807973	121.9023191	142.2408183	143.4148949	143.7943215	120.3068802	127.0284003	133.4330449
GGA1	90.79189248	114.174473	98.19629472	113.3109764	117.4569923	114.4368743	130.4517766	123.4800806	116.9687326	102.4986822	105.3922189	102.7659444	98.59374003	102.5044792	101.4618008
ESYT1	137.197535	175.5845737	155.2775444	112.6397526	106.0424321	103.418795	130.413577	115.087038	119.1441723	133.04976	138.0208049	131.5482089	111.7824622	114.8254861	126.8871223
MTPN	243.2204945	92.68687106	196.1245557	233.4344554	310.4269485	298.5899494	130.3795793	186.4717078	208.1724893	182.4616247	187.9104788	193.6695398	245.6399502	225.4389987	147.5458945
DCTN5	105.452683	80.77822772	83.84325585	149.7093483	162.0754559	157.0374626	130.298978	135.0825408	132.1579636	93.86717554	101.3560817	94.53686879	126.0970509	126.7528507	118.465234
ATP6V0E2	170.1136348	211.142251	180.1782055	165.8342428	154.4666581	155.4464042	130.2607784	122.4155971	115.4148471	173.1595385	166.1983237	174.8386068	142.3014869	150.4107585	170.2738168
STAT5B	82.7910589	97.56111239	90.41463131	155.1345151	133.5647676	139.0485587	130.2115009	120.5584829	121.1164415	109.0397746	109.5385012	99.56167497	139.8257869	137.8830893	142.8879117
FBRSL1	91.92275235	109.4277985	98.60992696	92.08352213	94.39412678	90.96876316	130.1843791	122.0471221	121.319612	102.2045683	106.9387762	113.3740419	126.6599841	127.1858573	111.7596547
CD320	134.6127125	157.6150204	138.4840753	131.9374383	131.28692	131.6203049	130.1461795	116.8065882	114.6379043	89.74149329	88.49325181	91.26083869	134.4606308	140.0579636	168.9965636
PIN1	116.4785667	157.1488292	131.8245962	144.9424004	125.8718216	132.0578459	130.1079798	113.4493711	111.7632161	114.7044076	115.0110506	113.3350415	116.6880235	120.3364796	146.2055769
SH3PXD2A	144.871227	128.7111635	128.5569014	65.02481062	88.78424058	81.30308347	130.0697802	132.4053649	129.7105939	162.5346751	170.234461	172.3815842	117.9345186	127.30395	84.6180243
SCMH1	80.29105083	81.7106102	80.8651037	117.9256404	109.2369507	117.3405559	130.0315806	120.7369886	119.2995609	83.01363861	88.83273999	82.79776091	127.2631269	131.5159236	134.3510707
PKMYT1	72.61735885	84.21109049	73.04745429	135.2096546	134.6762263	135.6377273	129.9169816	123.6847889	120.736905	64.66828623	65.70982296	67.04161611	111.299948	114.7073934	119.1038606
WLS	117.9729172	124.6002044	121.7319694	214.749681	175.8543493	177.840551	129.8405823	120.941697	115.958707	116.2485054	115.1242134	113.5300433	131.2438693	136.2002681	142.7729589
GSTO1	131.2605207	179.3564846	134.0995735	113.8143943	78.65527939	87.70709347	129.7259834	114.1863212	114.3271272	100.4398852	96.2260381	94.61486951	118.0953566	119.3917379	172.6686666
INTS14	61.99535363	44.75435911	50.54586021	87.30105219	76.51261453	83.41123583	129.6877838	131.6274732	130.5652309	120.2190426	108.0326825	110.0980118	105.7510344	108.1335655	97.86952622
IFRD2	122.9810109	158.4626408	135.7954657	114.3597637	113.7560257	112.1298397	129.6877838	119.1812051	117.3183568	112.1309113	114.4829579	111.5020247	141.0549919	143.5613809	165.2446324
KIAA0930	91.27654671	105.4863635	92.23999041	129.0427855	118.158228	116.7041325	129.6495841	125.6909308	122.0965548	97.46198226	101.4692444	108.1479939	103.1374157	100.496903	103.5772514
UMPS	45.63827336	27.75956934	33.33875886	120.1071179	121.0021287	117.3803323	129.6113845	126.6325893	137.36348	68.71235189	60.91926755	62.28357239	112.0237193	113.9594729	105.5729596
ASF1B	76.93885907	94.6792029	84.96006291	128.2457071	117.7296951	113.8800039	129.6113845	114.0634962	114.4436686	105.8809917	107.1273807	99.09991073	101.2877778	103.5279494	121.418882
GPR107	107.9567298	46.06817079	67.25660287	138.062356	154.6614459	149.6788176	129.5731849	128.8843812	133.7506962	130.8806703	123.0833251	123.8651383	150.2227621	150.2926658	110.4824015
NDUFAF3	121.607824	142.3154715	128.9291704	120.2329724	116.9505442	113.800451	129.5731849	117.3797716	118.0564524	108.6750734	116.2935615	107.6409892	121.2719086	126.0836586	136.1072938
GRAMD1A	230.1299837	282.0033196	253.0188436	107.8572826	104.523088	105.0496299	129.4967856	121.9652387	111.4135918	134.9247359	140.9630358	141.3372989	155.248952	164.9361628	163.1291818
FAF1	110.5415524	89.2544321	91.12318335	111.0875474	87.49864166	96.02037353	129.2675877	115.823988	116.3471784	99.52077932	97.01817718	94.02986413	130.5603075	135.9640827	127.7253197
MBTPS1	116.5189545	113.0725664	114.5761316	102.2777344	84.61578348	93.79289179	129.1529888	119.3449718	119.066478	155.4759423	149.1861939	147.7333577	114.0341952	111.5582543	104.0562214
SAP30BP	53.59468031	75.09917079	59.31486379	148.3824227	125.4822461	124.9378597	129.0383899	115.5373963	114.8709871	101.8001618	99.80952442	100.6599251	118.4974518	127.3433142	148.9596541
NAA50	117.4074873	36.10863065	67.87705124	172.8401418	248.7049548	243.3921564	128.9619906	204.9949481	229.7419743	131.2850768	141.6042913	136.0332501	210.6576689	184.382097	101.5815433
IGF2BP2	131.3816843	70.0982102	100.7608146	128.0779012	136.3124431	129.6712584	128.9619906	138.6694406	133.6730019	105.1089428	103.694778	111.0340204	133.857488	133.6415925	99.66566353
ZNF687	87.19737361	108.2411299	99.18901211	83.81907846	90.42045739	83.17257707	128.8855913	114.2272629	111.452439	105.4765851	108.9002634	112.2820319	99.07625426	105.0631548	105.7725304
ADIPOR1	162.3187793	192.3250773	182.8254518	159.0800528	132.0271134	134.7626452	128.8473917	122.1699471	121.9800134	158.2332598	152.2038666	148.747367	140.1301729	143.4039239	161.0536453
PDAP1	158.8050361	209.3622481	177.8618649	118.7646702	108.0682244	108.9079464	128.8473917	118.4851967	113.3171016	194.5563222	187.586079	176.827625	137.8382304	148.9149174	140.7373366
USP39	170.8002283	179.6955328	177.3655062	96.19476822	74.87639772	82.17816558	128.7327927	123.1116055	118.2895353	129.5571579	131.1933205	129.1301867	134.2595832	128.4848772	139.5798259
XPNPEP1	120.3154127	142.4426146	130.1700672	94.51670859	80.60315654	85.71827049	128.6945931	119.5906218	119.338408	129.8512717	120.7823497	117.4300792	110.29471	110.4560556	118.3854057
TM9SF4	142.5691194	143.0783299	147.832164	151.1931726	141.5717114	132.1373989	128.6563935	125.7728142	123.7669817	116.3587981	115.4637015	114.9340562	152.3136571	153.7960831	134.0317574
AUP1	136.7128808	154.7331109	153.3334728	148.4243742	139.1173862	142.0019609	128.5799942	115.209863	113.5113373	127.6086535	125.9123932	126.1661595	150.2227621	158.5197918	176.6600828
REPS1	44.83051631	32.29433868	40.41187024	118.7227187	114.3793464	118.3747438	128.4653952	138.3419073	132.5852821	82.68276051	81.40172098	81.35474765	99.88044464	106.0472608	94.99570653
CCNG1	182.5934813	99.59540144	175.3387082	133.363789	116.5220112	124.9378597	128.4271956	139.4063907	138.9562127	171.3948553	161.0305592	178.777643	168.2768361	160.1337256	149.6381949
ADCK2	119.6288192	158.1659737	130.0459775	142.2994565	125.3653735	127.7619883	128.2361974	111.4432292	116.5414141	107.7192033	104.2983126	98.59290607	132.4501548	139.4675	172.3493533
HNRNPR	93.90175713	43.01673722	84.54643067	144.732643	193.5410738	185.199196	128.1979978	165.404352	182.0376888	221.1000986	223.6849886	215.671982	154.8870663	139.6643212	93.35922587
KARS	134.6531003	107.2663664	125.537386	127.2808228	106.3151349	110.339899	128.1215985	122.2108888	120.0765036	169.3728224	159.3708393	157.6004483	169.4027026	165.6447191	173.8660914
ANXA11	166.0748496	195.9274642	177.6136856	85.32933212	77.17489276	76.41057893	128.0069995	117.7482466	108.4223622	120.0719857	125.0825333	126.3221609	97.06577832	102.6225719	110.3227449
HDAC3	111.5512487	142.4002335	125.0823906	153.5005045	129.923406	131.540752	127.9687999	116.0286964	112.3459232	116.1382127	119.4998388	114.1930494	117.2509567	119.7853803	147.5227443
SETD1A	112.7224964	117.5225737	119.4983553	108.8641184	122.7162606	110.5387813	127.8160013	126.3459976	122.0188605	129.0792228	132.9662032	138.841276	129.1127648	133.5234998	108.4467793
NUCB1	207.876277	255.0913707	240.1548809	104.5431149	107.678649	101.2310897	127.8160013	114.1044379	107.0238653	170.2183998	176.5715736	185.9927093	130.680936	136.2002681	146.0858344
MED12	78.59476102	94.55205983	93.23270779	109.7031482	116.3661811	105.6462768	127.7396021	121.2282887	115.7644713	126.9468973	132.1740641	135.8772487	113.8331477	116.8724266	95.79398978
FBXL19	140.7920539	178.5927786	157.2621519	122.5403044	119.015294	112.8458159	127.7380741	120.816006	114.8709871	122.7557747	123.0833251	131.1554753	134.5410498	145.2875027	140.4144311
GRN	230.5338622	266.9156759	249.3788799	96.57233164	101.873975	95.46350309	127.6250031	116.8065882	112.9674774	126.579255	136.6251313	140.8302942	118.0149376	127.7763209	127.3660922
ATN1	189.5805798	194.3593664	200.9011809	72.74388491	90.92690545	82.93391831	127.5868035	126.1412892	118.211841	169.9610502	183.3990581	188.9177362	135.3854497	135.0980694	99.46609272
TAF6	123.9907073	148.1640525	136.7054566	124.8895879	132.4556463	124.9378597	127.5486038	122.5793638	120.193045	105.4398209	106.1089162	109.5130064	131.7263835	138.0897516	142.3339031
CNDP2	58.11811979	70.22535327	63.45118623	134.0350128	116.0155632	120.3635668	127.5486038	118.7717884	121.1642235	83.38128094	84.34395186	78.62472256	107.9625579	108.2516582	117.8266074
FOXC1	212.5612679	69.1234467	124.7514848	108.9060699	126.2224394	132.9329281	127.5104042	156.438126	164.4399352	105.770699	99.2814317	125.0741494	201.0073844	202.0172763	124.3725301
PRDX1	310.9460766	326.9695839	306.0464973	156.9405268	126.8068026	138.0640913	127.4722046	126.9601226	122.2907905	226.1735628	207.2763933	218.168005	151.6703048	146.5136988	160.734332
MRPL10	146.5675168	176.9831474	165.1219918	141.6282327	125.6380763	124.2616599	127.3576056	116.2743464	113.0063245	124.4101652	129.4958796	124.0991405	141.5375061	144.742308	171.0321859
TXN	166.519116	162.3616949	180.8813803	169.9035374	138.4940655	141.0871023	127.319406	121.5148804	134.6053332	158.5273736	144.4710803	140.1672881	144.472801	130.3743607	163.0493534
COPS7A	101.8985519	136.4668905	119.7878979	110.5841295	93.92663626	99.16271384	127.2812063	114.2272629	120.2318922	118.380831	116.5576079	122.851129	111.460786	116.2032345	136.5862638
MYO19	138.3283949	158.5897839	162.5574719	86.21031343	88.12196235	84.48520024	127.2812063	121.1054636	113.0840188	119.1161156	115.1996552	117.7810824	144.8748961	145.2934074	132.0759634
RNF220	92.60934585	105.2744584	100.2230927	128.4135131	119.9892326	117.9769792	127.2430067	110.7472208	110.4035663	127.5718893	128.7791823	130.9632036	123.4030131	125.0601884	140.4579375
JMJD4	34.04695968	44.75435911	38.59188836	98.46014872	89.40756127	94.90663266	127.2048071	112.6305377	115.2594585	74.2637511	75.21549195	72.22866378	100.0010732	107.2675522	121.1793971
ERI3	124.8388522	155.4959693	138.8149811	127.4905803	106.3540925	113.9197804	127.1284078	114.964213	107.7619609	108.8221303	108.4476125	102.4539416	123.6442702	133.3660429	166.9609413
LTBP4	93.53826646	110.8687533	102.4153436	127.3227743	139.4680041	130.5463405	126.9756092	129.5803896	123.1065804	104.2266012	113.0872843	108.5379975	145.638877	158.4016991	122.3768219
PTPRU	185.5014067	237.9270569	213.3515114	91.49620126	92.67999489	86.11603508	126.9374096	113.4903128	99.91483899	130.7336133	136.8514568	135.0582412	94.6532072	104.3152342	89.9266079
CTB-50L17.10	155.8971108	187.9174511	171.4505651	117.3383195	115.4701576	113.2038041	126.8610103	122.9068972	118.6391595	170.5860421	171.5169719	173.1615914	126.4589365	136.4758178	133.9120149
TOMM22	102.8678604	129.2621168	116.4788399	139.0272402	111.0289977	109.5841463	126.8228106	112.1392376	114.4048215	100.9178202	101.657849	104.8329634	102.8157395	106.4015389	120.3012855
CRABP2	185.0571403	226.1027518	207.0229381	152.7873292	142.54565	133.8875631	126.6318124	115.1279796	103.9549413	134.3365082	127.647555	127.9991763	148.7752195	149.3085598	176.0613704
SNRPD1	114.0956834	91.88205545	112.0943381	140.4955424	137.2863817	147.0933477	126.5936128	136.008232	149.9887999	125.9910272	122.2534651	119.6140993	136.9938305	127.8550494	130.7987102
TTYH3	99.31372937	120.065435	113.6661406	150.4799972	159.4142661	141.2859846	126.5554132	124.3398557	117.7845225	170.0713429	181.8902218	182.1706741	149.2577337	156.1579374	134.430899
NCSTN	102.3428183	115.7425708	113.7902303	122.4983529	109.4317384	110.9763223	126.4408142	116.6837631	116.9298854	115.1088142	117.0479797	111.7750272	105.9922915	106.7558171	105.1738179
PGLS	80.29105083	92.22110363	86.15959642	115.7861144	109.8213138	115.1130741	126.3644149	116.5609381	113.3171016	80.69749191	84.45711458	77.6497136	109.7719863	113.1328238	141.6154482
KIF5B	60.46061524	32.80291094	60.3489444	101.8582195	145.3116355	151.9460758	126.2116164	179.0788702	205.6179016	146.4319409	150.2423794	148.0063602	149.0968956	135.4917118	69.37081426
CUL7	106.6643185	130.4064044	118.1747321	58.43842657	58.12465421	58.27251335	126.1734167	116.2334048	110.2481777	111.4323909	113.7285397	119.7311003	81.74595167	85.81404175	83.69999857
COTL1	170.6790648	202.2422365	188.4922136	170.7006157	137.8707448	142.0019609	125.9060192	118.444255	115.7644713	76.0284343	77.29014193	82.29075625	148.6545909	150.0564803	171.7107267
AURKAIP1	167.8519151	214.4055897	182.5772725	111.2134019	98.87424423	98.96383154	125.7532207	112.9171294	116.813344	162.3876181	161.2568847	159.9404699	107.5604627	105.9685323	141.3360491
ATP6V0B	147.617601	188.4260233	163.3020099	154.5912433	129.8844485	136.5525859	125.715021	113.5312545	109.7431649	138.1599884	136.8514568	133.7712294	116.1652997	118.8800028	147.8420576
SF3B1	148.7888487	61.70676787	134.6786586	139.9921245	235.5762627	231.9763125	125.6768214	198.1986307	220.9625211	213.3060811	234.3222849	242.8162315	202.8570222	179.6190241	98.26866784
RNF126	103.4736782	122.6930584	111.2670736	124.134461	122.0929399	125.9322712	125.5240228	117.8710716	111.9962989	98.63843773	100.7525471	101.8689362	131.1634502	142.9709173	143.3317572
C15orf38-AP3S2	91.35691854	106.8908705	103.8527157	124.4549704	107.9466769	114.8465719	125.3895601	110.3324817	109.9335159	92.7109404	90.7301017	85.93689976	125.1702215	128.2620756	125.0778133
FSTL1	157.9972791	34.83719999	81.07191982	111.7168198	156.4924504	154.0542281	125.3330246	168.2293273	167.7807891	142.2775826	137.3418286	142.1173061	133.857488	131.7521091	75.39785279
TMEM230	111.5512487	80.99013283	92.81907555	137.810647	115.1974548	116.8234619	125.294825	126.4688226	129.0890396	120.3293353	116.4067243	114.6220534	117.2509567	114.4318437	109.0454917
LETM1	167.0037702	193.596508	177.696412	118.8066217	119.443827	113.9197804	125.294825	118.6080217	117.2018154	134.5570936	131.796855	130.8852028	130.8819836	145.0572219	127.4060064
TAB1	55.08903085	70.98821166	63.49254945	114.6953756	110.0161015	110.2603461	125.2184257	108.4954289	107.6454195	72.71965331	69.40647201	69.92764264	86.24941777	95.18273071	99.38626439
KDM4A	81.10082727	81.03802338	83.38081501	124.3186281	116.611224	114.1361643	125.0232255	118.704644	122.5988483	137.9713879	141.2018092	134.8359391	119.1283392	113.8091015	104.8616892
DENND4B	81.90656493	89.76300436	82.43690623	107.6475252	120.807341	112.2889455	124.9892278	123.0297222	120.193045	103.3442596	103.3175689	102.3369405	120.1460421	125.6900162	105.5330454
ADRBK1	95.63843479	121.5063898	106.3448499	142.8028744	133.3516698	136.7514682	124.9128286	116.1924631	110.9085791	120.4763923	120.5560242	113.2960412	116.5271854	122.1078704	127.6854055
ZFR	104.5641502	36.10863065	80.5341979	187.9426784	240.5628283	238.3405461	124.7218304	156.438126	177.2594908	122.0572543	128.062485	128.077177	163.0898081	151.6310499	130.758796
CORO1C	133.360689	55.64628174	86.32504932	132.2730502	143.1689707	136.5525859	124.7218304	131.7502982	130.1767595	147.2775183	126.5913696	140.6352924	151.5898858	156.3547586	114.9527877
EEFSEC	56.90648421	76.92155473	66.67751773	113.9822003	103.1985315	108.351076	124.6072314	113.6540795	107.0238653	68.63882342	70.46265745	62.98557884	96.34200698	101.2841878	124.8515
CGGBP1	77.34273759	33.56576934	63.53391268	176.9513879	228.6807776	231.1807833	124.5690318	179.8977036	202.4324362	115.1088142	120.8955124	119.3800971	166.4674077	143.6401093	94.9158782
C20orf24	105.3900818	128.826016	118.3257079	156.7882429	117.0237844	119.7406675	124.5384721	112.1543861	113.2331918	116.3418866	107.3484252	100.8404967	114.5593316	115.579705	155.6700231
ADH5	91.51887383	89.80538538	91.2059098	143.8936132	119.0542515	123.0285896	124.4544329	123.1525472	135.8484417	99.04284429	93.09520268	95.9408817	101.1671492	96.75730028	122.1772511
UBFD1	125.7677728	86.49966567	99.64400757	142.6350684	126.9236752	131.978293	124.4544329	123.6847889	123.4173575	107.3883252	104.1474289	107.7189899	115.4415284	114.7073934	93.43905419
SAMD4B	121.042394	138.2045124	136.0850083	105.0884843	115.2753698	100.8731016	124.4162332	118.4033133	117.7845225	113.344131	123.3096505	120.1601043	117.6932615	115.6914994	100.7433459
AMD1	64.09552196	32.84529196	50.38040732	158.4503609	184.658754	185.5174077	124.3780336	172.6919695	190.6229063	167.4607147	167.0278065	168.8325516	147.0860176	126.8315791	90.84463364
RAPGEF1	111.5916365	141.2135649	130.7491523	147.123878	141.182136	135.7172802	124.3398339	113.2856044	109.4323878	138.7114519	141.2270822	141.6103014	132.1686882	135.6098045	128.6034313
ARPIN	64.73970821	38.45018211	46.88686938	131.45164	148.8968982	144.2493308	124.3203521	141.5034231	138.3195081	122.5958503	115.8092251	106.5489792	130.444102	130.4755268	86.8005307
CUL9	63.61086773	74.50583648	69.65566989	74.63170199	79.70713305	73.74555614	124.3016343	119.8772135	113.9386558	57.35220382	58.9577803	61.4255645	95.7388642	103.0949428	91.60300272
MRPL38	115.307319	145.7483343	121.2769739	123.2115282	119.2879968	119.0907201	124.225235	118.444255	111.9186046	141.4687694	144.0561503	142.7413118	129.9571647	131.082917	148.7201691
GYPC	64.53978834	83.36347005	76.60469159	105.2982417	87.88821709	95.78171477	124.225235	106.1617536	105.5865211	84.52097217	91.17143633	85.29378385	83.39454194	89.43555177	110.7618007
DUSP3	87.43970072	55.51913867	73.79199233	142.7609229	137.7928297	139.4960439	124.1870354	128.9253229	128.9336511	102.2413326	95.39617811	93.99086378	108.6059102	105.259976	94.15750912
DNAJC11	76.7369198	87.77109633	81.81645786	145.9072847	128.9494675	128.4779646	124.1106361	118.4851967	112.2682289	114.447058	122.5929533	120.4721071	131.3644978	131.7521091	136.1871221
TP53	95.35571982	116.9292394	106.8825718	74.96731392	68.799021	61.29552428	124.0724364	114.3910296	107.2957952	89.63120059	93.05748177	90.20782901	94.69341671	97.26903539	106.6107278
MYH10	154.7662509	23.56384817	64.44390361	102.0679769	189.8790648	174.3402225	123.9960372	189.6008797	177.9587393	196.3577696	192.7915644	209.0029207	167.3922267	164.5031562	59.91115777
UQCR10	112.7224964	110.9111343	110.9361678	124.5959274	116.9895017	114.8346389	123.9578375	110.0102707	105.1980498	112.719139	112.5969125	113.9590473	92.80356933	93.33261146	111.4802556
ANGEL1	54.35235642	70.17958177	59.24413267	114.381998	104.2729805	100.2577598	123.9555455	114.8651341	110.0026638	41.7490956	42.89018203	43.80130253	90.35521173	96.41522504	96.29810565
HIGD1A	103.3403983	98.15910861	110.513022	172.8820933	139.5568273	147.988318	123.9509616	128.9662645	146.7726453	108.147139	102.915464	99.86470776	130.1473557	114.5499365	135.0938732
MRPS5	126.6563055	136.6364146	135.6300128	84.0707874	68.91589363	79.47336633	123.9196379	116.8065882	112.8897831	123.4542951	121.2350006	119.5750989	135.4658688	142.3017252	151.9931304
POLR3D	89.62064476	97.98492261	85.49778483	107.6475252	92.95269769	96.06014999	123.9196379	111.2385209	110.7531905	59.48452935	62.50354572	59.67054837	117.4117948	123.1313406	119.3433456
MYO1D	135.016591	46.95817225	86.86277124	145.4877698	166.6993267	161.1344379	123.8814382	132.4463066	131.3421737	109.5206508	101.4315235	102.5319423	134.9029355	139.8217781	87.29227318
NDUFA10	114.4995619	128.9230686	117.4301941	118.5549128	102.8089561	102.981254	123.8814382	119.5087385	113.6667259	103.417788	104.5623589	100.7769261	134.2595832	140.136692	156.30386
SIVA1	51.65606338	70.73392553	58.61168897	133.3218375	111.8471061	114.7153096	123.8432386	110.7881625	117.0464269	63.38153807	63.25796389	60.06055196	90.18995061	92.38786972	115.990556
M6PR	114.9034404	106.0796978	119.4156288	122.5822559	117.4180347	112.9253689	123.7286397	117.3388299	123.4173575	144.8143146	134.7390859	138.0222684	111.6216241	111.9518967	114.1145903
MRPS2	202.9893468	226.6537051	220.7968918	97.201604	93.77080609	89.21859893	123.69044	108.9048456	105.3922855	144.1525585	155.3724229	159.9014695	137.3155066	141.3569834	152.1927013
CHCHD10	66.11491459	77.68441312	69.28340087	141.6701842	126.8457601	131.3020932	123.4994418	119.2630884	112.1905346	58.93306585	61.90001118	59.94355088	103.1776252	111.3614331	127.3261781
LRRC61	72.13270462	91.88205545	77.92831477	140.2438335	128.053444	135.001304	123.3848429	116.8065882	113.6667259	53.41843087	51.75308674	51.6754749	121.070861	125.8474732	156.7030016
SNF8	131.5836235	156.4707328	129.7977982	130.2593787	121.6644069	124.619648	123.3466432	126.5097643	119.9599622	132.4247681	131.0047159	125.1911505	116.2055093	114.4318437	129.4017145
PTPN9	92.12469162	86.1606175	93.52225036	101.5226075	92.29041946	95.62260893	123.270244	115.701163	112.850936	127.3880681	125.4974632	121.0571125	102.2528062	100.7330885	99.54592104
KIF1C	201.0911177	257.464708	226.7945594	144.9424004	132.7673067	127.7619883	123.2320443	113.9816128	107.9950437	150.2554212	154.3539584	152.3354	148.4535433	154.268454	149.8776798
RBM10	51.37334842	69.25058977	58.52896252	104.9626298	101.6012722	105.6065003	123.1174454	113.3674878	114.4048215	97.46198226	101.4692444	98.94390929	98.3122734	102.6619362	109.4047192
DLG5	82.63354627	65.90248904	70.1933918	94.18109666	117.1842895	107.913535	123.0792458	134.2067985	128.350944	113.7485376	112.6346334	115.1680584	113.9135667	110.4166913	65.45922635
CHD1L	92.52857014	80.86298976	81.19600949	87.46885815	73.16226582	78.319849	123.0410461	116.1515214	114.0163501	142.1672899	136.9268986	142.0783057	115.2404808	118.5650889	116.3896976
ARF5	210.9457538	263.6523372	223.4855014	197.6754243	169.9717603	177.6416687	123.0410461	112.1801793	111.3358976	136.1011914	136.8514568	136.2282519	165.6230078	168.085302	203.242915
AURKB	182.1492149	233.3922875	204.3343285	102.5713948	92.75790997	92.12228049	123.0410461	114.1863212	106.7519353	156.1376985	159.1822347	156.040434	142.7437916	139.4281357	164.2068641
EI24	148.6272973	186.7731635	166.9006104	142.4672625	103.5881069	110.9763223	122.9646468	108.0041288	112.8120888	159.0053087	153.2223311	164.5815125	135.7473354	140.0185993	154.348066
UQCRFS1	155.3720687	159.3102613	150.6035	116.5831927	92.0566742	101.7481837	122.8500479	114.7185629	110.2870248	148.1966241	140.6989895	142.3123079	112.1845574	113.4477378	130.1600836
CAP1	128.2718196	89.08490801	111.2670736	129.1686399	116.4440961	117.6587676	122.8118483	118.7308467	120.193045	167.2037327	156.8812593	163.2555003	132.2491072	138.1291158	136.0274655
ARAF	134.8146517	157.3607343	146.3844511	98.66990617	91.7839714	93.79289179	122.7736486	118.2395467	110.2481777	99.52077932	105.8825907	104.247958	105.5097773	109.5900423	118.3454915
SRF	84.89526601	102.1806438	97.28630378	97.24355549	89.60234899	92.87803322	122.6208501	110.9928708	113.0840188	97.42521803	101.3183608	104.2869584	91.11476954	96.56047909	100.7034318
EIF2B5	91.43809812	111.1654204	99.27173856	106.9343498	90.14775459	93.99177409	122.6208501	107.5947121	107.9950437	96.68993337	95.54706174	102.6489433	104.3034917	104.7088766	126.6476373
PGAM5	164.7016626	207.3279591	185.5967879	121.2817597	104.9905785	103.5779009	122.5826504	113.9406712	107.1404067	108.1236099	107.6177525	113.2960412	130.0777932	135.1374336	152.5918429
COX6B1	213.1266978	253.1418437	234.6122088	114.9470846	107.8344791	105.1291828	122.4680515	113.9406712	110.7531905	175.6227421	171.2906464	173.8245974	111.460786	113.5264662	137.5042895
PMPCA	261.9556115	309.1695547	276.4304287	125.3510543	113.9897709	108.6692877	122.4680515	109.9693291	109.6654706	135.9908987	134.1732723	142.5853104	148.2122862	153.3630764	169.3957053
GUSB	136.3493901	173.1264744	152.5062084	96.99184654	87.07010869	88.58217558	122.4298518	111.1566375	102.7895272	116.2117412	121.1972797	114.1540491	88.94345553	93.1751545	107.8480668
CDC42BPB	77.94855538	66.15677517	68.45613638	106.6406894	110.6394222	108.3112996	122.2770533	121.0235803	118.6780067	101.9839829	104.4114753	107.289986	121.6740038	128.6029699	91.64291689
MAU2	48.14232021	46.15293284	49.71859573	113.5626854	122.3656427	120.6817785	122.2770533	118.6080217	110.4424134	102.0207472	109.5415189	100.7379258	115.4415284	120.0215657	102.4995691
TRAPPC1	161.8745129	201.7760452	178.606403	125.8544722	111.340658	107.1577822	122.0860551	108.5363706	109.3158464	135.3291425	134.7390859	133.2252243	110.0132434	112.3455391	128.9626587
RFWD3	59.37014322	31.91290948	41.1977715	123.9666551	125.4432886	122.5512721	122.0096558	120.0409802	120.8534464	87.60916776	83.13688278	81.97875338	101.689873	98.96169769	93.39914003
THRAP3	95.67882264	27.16623503	62.95482753	140.5374939	229.1093106	198.4447571	121.9714561	169.4166358	170.7720187	160.3655853	162.6902792	163.4115018	151.6300953	136.8300959	95.47467648
IPO7	186.4303273	69.33535181	141.5449539	231.0268594	320.464749	314.8306779	121.9332565	168.1474439	184.9512241	167.7551962	180.532269	187.9427272	223.0422006	200.1277928	122.6562211
DVL3	114.4995619	117.6497168	120.2428933	102.1938314	110.6783798	105.8053826	121.9332565	123.8485556	114.9486814	139.667322	145.1500567	147.6943573	118.2561947	121.045036	100.2244618
OTUD5	102.0601033	119.3025766	110.605262	119.4778456	111.9250211	114.1186627	121.9332565	118.5261384	110.7531905	130.9541987	132.7775986	134.9412401	120.3470897	126.9890361	129.2021437
GATC	120.324298	74.82454176	90.25083295	141.7456968	134.078228	134.5772869	121.9252346	127.3285977	128.3365706	102.5376523	97.10455806	94.51385858	128.2281554	128.1050123	154.0287527
PXDN	114.4995619	68.78439852	91.86772139	104.1236	128.2092741	116.3859209	121.8950569	123.7257306	121.2419178	148.2333883	145.7913121	151.9453964	118.7387089	124.5878175	74.67939786
ERCC2	135.5012452	165.8369386	152.630298	104.7109208	107.3669886	99.87869011	121.8950569	114.3500879	109.2769993	118.5646521	123.6114178	125.1521501	127.1022888	128.6816984	126.2884099
ATP6V0A1	106.0585007	120.8282934	116.685656	128.7071735	116.5609688	116.3859209	121.8186576	116.4790548	108.4223622	103.6751377	110.4845416	109.357005	97.0255688	98.52869105	95.75407561
UQCR11	150.5594522	170.3640794	151.957732	146.8365102	120.1548021	125.9501706	121.7155185	114.8381126	113.7362622	119.0157493	106.9327408	114.3849312	133.9149876	129.5571591	159.7209114
ABR	93.57865431	104.0030277	102.125801	139.2789492	141.7275416	135.7570567	121.7040587	117.1750632	110.7531905	121.3219696	122.9324415	125.1911505	114.3156619	121.6748638	102.6193115
BRPF1	76.69653195	89.2544321	87.40049315	87.30105219	77.91508608	81.82017744	121.7040587	114.7185629	106.3246168	92.02087575	96.18831719	93.56185983	105.3087297	103.449221	97.7896979
TCF3	189.8229069	214.8294	195.1930559	124.470073	134.6372687	127.7222118	121.665859	122.1699471	115.4148471	183.0491172	181.6261754	188.3717311	173.1421878	178.1625472	149.8377657
CCDC97	44.46702563	48.56865108	48.06406675	100.4738203	98.99111686	100.1173489	121.6276594	113.0808961	110.5201077	95.99141293	98.60245535	90.48083152	88.54136034	89.12063785	99.14677942
ZNF76	30.97748289	36.74434598	34.82783494	61.16527347	58.28048438	59.26692484	121.5130604	106.9805871	107.0627124	63.01389574	67.52042658	61.73756737	77.44353316	83.88519402	97.07124297
UBE2O	116.3170153	138.7978467	127.4814576	161.8068997	157.466389	157.7136624	121.3602619	111.1156959	106.946171	135.0717928	133.0793659	137.9442677	141.3364585	145.9232352	125.090985
AKT1S1	108.8048747	135.6616511	126.7782828	131.2662145	129.0273825	125.7333889	121.3602619	111.1566375	103.56647	105.9545201	107.2405434	115.7530638	138.8434683	140.5696987	162.8497826
IP6K2	88.08590636	87.30490509	91.53681559	113.017316	101.9908477	104.7314182	121.1692637	118.8536717	120.6203636	101.1751698	93.69873721	92.66485159	89.66722687	90.65584319	99.82532018
TACC3	137.6014136	161.2597883	143.6131151	86.29421641	78.85006711	82.6554831	121.1692637	118.3623717	109.3158464	160.0714714	164.8780919	160.9544792	124.8103463	122.3046916	127.3660922
IGFBP2	149.3138908	195.0798438	159.3311404	99.13137257	92.8747826	94.74752682	121.131064	111.6069959	103.56647	104.9251216	101.205198	101.7129347	123.0009179	128.3667845	159.6566496
SCAMP4	70.67874192	81.88013429	80.24465533	159.3737132	164.5566618	145.9796068	121.0546647	115.9058714	114.6767514	114.2264726	123.4982551	112.5550344	123.6442702	125.3751023	123.0553627
RNH1	104.4429866	130.0249752	115.0311271	159.0800528	153.4148045	155.1281925	121.0546647	112.221121	110.4424134	84.07980137	84.90976549	94.53686879	122.7596608	122.2259631	143.2519289
RNF213	77.82739182	34.92196204	49.47041638	140.4535909	180.9149341	160.2486162	121.0164651	132.2825399	129.2055811	92.16793268	99.24371079	92.9378541	172.1771594	178.6742823	81.14549217
KEAP1	79.40251807	100.8668321	85.45642161	120.7363903	110.405677	109.385264	120.9400658	111.3613459	108.8108336	105.9545201	106.6370089	111.4630243	94.89446431	100.3394461	110.2429166
FAM50A	96.44619184	115.1916175	100.5539985	161.6810452	158.4792851	160.2195794	120.9018662	109.355204	113.9386558	110.4029924	108.9002634	102.9609462	121.4729562	129.7051686	142.9725297
RXRB	91.47848598	127.1006846	103.2426081	83.10590312	72.14936971	68.69394577	120.9018662	107.4718871	104.2268713	83.01363861	83.85358004	88.76481575	78.52919017	82.27126021	97.19098546
ELP2	95.75959835	48.56865108	56.66761743	123.6310431	119.8334024	131.1429874	120.8636665	137.5230738	138.2569642	113.3808952	105.2036144	104.247958	158.0234088	154.3865467	123.4944185
ILVBL	97.25394889	140.8321357	111.142984	105.4660477	87.2648964	89.57658707	120.8254669	103.0501866	106.5188525	102.7927961	99.50775715	100.8159265	107.9223484	114.0775656	146.1656627
RAB10	89.21676624	52.21341897	81.56827851	132.5247592	145.701211	143.0361488	120.7872673	145.5476414	166.343445	95.32965674	97.31994445	96.68188851	146.2822293	130.0200825	113.0768221
MRPL24	85.09720528	119.2178146	97.28630378	100.4318688	82.78477895	87.78664639	120.7490676	103.62337	106.4411582	75.51373503	73.06540015	71.48765697	107.2789961	108.7633933	138.3824011
CLIC4	141.2767081	44.50007298	96.66585542	182.8245966	231.6415509	232.5729594	120.6344687	190.1740631	215.7181574	147.8289818	160.6533502	152.2573992	167.9149504	141.4357119	104.7347622
ANAPC16	68.86128856	58.95200145	63.07891721	129.7559608	117.6128224	124.6594245	120.6344687	127.8608394	131.0702437	71.06526281	67.29410112	62.63457561	104.3034917	100.8905454	97.23089962
SPOP	73.66744301	44.79674014	52.32447886	143.1384863	124.3914349	125.136742	120.6344687	128.9662645	125.9812686	79.37397952	74.91372468	72.89166987	106.5552248	112.0699894	100.2244618
CTSB	183.6031776	229.3660905	206.1129472	127.1549684	110.6783798	106.5611353	120.3288715	102.5588866	102.4010558	167.2404969	169.2537173	163.5675032	119.985204	124.0367181	149.2390532
CYFIP1	168.417345	144.4345226	165.5769873	91.03473486	92.29041946	93.11669198	120.2906719	119.4268551	117.2018154	163.9684802	158.6918629	164.4645114	134.1389546	139.7824139	114.1944186
RPS19BP1	96.52696754	127.1430657	110.7707149	127.7842407	106.821583	114.8744154	120.2906719	107.6356538	107.1015595	115.07205	105.9203116	105.8859731	100.684635	100.0638964	125.1708133
PIGQ	66.87380234	83.36347005	72.36827014	105.5562434	110.1508946	107.8041497	120.1134256	106.3132378	111.7026146	65.46129074	66.41369511	61.03439091	98.56438709	99.59191916	105.6539853
CREBBP	50.80791848	19.15622189	31.35332409	106.430932	178.2697169	156.0430511	120.0614741	147.4718999	149.7945642	55.44046369	58.9577803	59.78754945	128.6704601	136.8694602	59.3523595
ARID1A	70.75951763	38.65149196	51.29039825	105.6338536	160.9336103	145.9398304	120.0614741	145.220108	140.5489454	139.4099724	143.792104	145.6273383	144.7542676	147.6158975	73.16265969
SUN2	127.3832869	165.3283664	149.0316975	112.9753645	102.8479136	102.6232658	119.9850748	104.9335035	105.0038141	164.6390598	168.4615783	162.5144935	98.23185437	100.4575388	101.1424875
LZTS3	41.35716099	49.92484378	43.88638109	130.1754757	129.8454909	128.8757292	119.8704758	112.466771	117.8233696	47.05821852	47.41518224	45.00641361	104.5045393	112.3849033	121.0197404
MYO1C	190.9537668	252.3789853	222.0377886	155.1785642	145.2337204	138.7800676	119.8322762	107.3081204	105.1592026	157.9759101	176.0812018	160.8374781	141.9798108	143.7975663	152.7115854
GSS	113.2879263	151.5969153	128.5569014	104.5011634	91.62814122	93.35535073	119.7558769	106.489287	107.8785023	84.8886145	81.25083734	84.16277346	112.5866526	120.06093	147.3231734
PGM1	152.2218162	187.790308	165.5769873	205.2686441	158.7519879	157.156792	119.7176773	108.0450705	107.1404067	123.1601813	123.1964878	123.7481372	126.5393556	132.8543078	154.587551
ZNF146	40.91289461	27.46290218	55.13717812	168.2674293	200.7482193	215.3895289	119.6794776	145.3838747	175.1228982	83.08716707	78.38404828	75.69969568	187.2959385	167.3373814	115.5515002
RANBP2	37.82443553	18.47431125	43.01444432	82.97165834	150.4657185	145.6613951	119.6752757	181.7191986	202.7917723	132.2894757	149.4547668	142.54709	166.5140508	147.9292368	64.65335941
PIEZO1	151.2121199	173.4655226	168.3069601	79.1205115	94.5889145	81.10420117	119.641278	117.4616549	110.1704834	154.7406576	168.0843692	169.1835548	110.1740814	120.6907578	86.49398993
BEX4	67.64965299	45.43245546	61.30029856	119.4778456	124.6251802	129.6712584	119.5648787	137.2364821	153.2519595	106.5795121	105.0904516	100.4259229	100.765054	101.4022805	87.85107146
PRPS1	225.7680956	232.7565722	225.5536626	144.6906915	123.0668785	128.0404235	119.106483	120.3685136	118.8722423	180.7329705	173.5916218	181.8976716	162.0845702	162.7711296	156.0244608
DDX23	173.9908687	205.9293854	201.0252706	120.0232149	110.6394222	110.1807932	119.106483	109.232379	111.3747447	177.350661	174.4214818	198.9018279	125.6145367	130.6105461	125.6896974
MAVS	102.9890239	86.5420467	88.93093246	125.5188602	133.2347972	119.6475905	119.0300837	119.8772135	109.199305	135.3659067	140.2086176	131.9382125	124.4484606	126.477301	97.03132881
WDTC1	174.6370743	214.1936846	197.4266701	107.7314282	109.2759082	104.4927594	119.0300837	107.8403621	103.9160942	150.3289496	155.9005157	155.0654251	122.6792418	121.871685	123.0154485
TMEM98	89.94374758	115.9544759	98.23765795	115.324648	95.87451342	96.17947937	119.0300837	104.6469118	105.9749925	137.6820534	137.153224	131.7042104	96.62347362	96.16683669	109.4446333
AMFR	146.2040262	153.0802511	153.4575625	140.3277365	119.7554873	120.0851316	118.9918841	115.3736297	108.2669737	125.4027995	122.8569996	122.3831247	113.471262	117.0298835	104.2957064
APBB1	109.0875897	127.1006846	119.8706243	133.363789	127.5469959	126.8073533	118.9536844	103.254895	105.6642154	107.7559676	111.2389598	109.0450021	108.9677959	110.1017774	123.135191
C16orf88	60.94526947	56.83295035	55.01308845	117.464174	105.2243237	104.452983	118.9154848	114.6366796	112.0351461	63.23448114	65.25717205	60.4895559	111.460786	111.6369828	105.8922729
CENPO	53.79661957	62.46962626	60.22485472	103.1167642	92.40729209	90.61077502	118.7244866	105.8342203	106.6353939	111.8000332	109.3906352	108.4989971	100.0814922	101.6778302	106.3313287
NDUFS8	118.3364079	142.1883284	124.7514848	175.5669887	166.8161993	162.9243786	118.6098877	104.4012618	100.3810046	105.1824712	110.0696116	99.95791861	123.0009179	129.5083474	159.8562204
COX8A	177.8277147	240.7242043	202.5557099	171.4070788	160.3882047	156.8338071	118.6045397	102.9273616	100.6816815	147.5716321	156.2777248	144.4893079	110.8540244	118.8406385	134.2313282
NDUFB2	94.54796277	131.1692627	104.9385003	151.40293	124.5862226	130.7054463	118.4952887	100.634628	110.6754962	91.94734728	86.49404365	88.80381611	109.209053	106.086625	155.4656626
SOD1	216.8423802	218.1775007	211.5315296	103.0748127	95.09536255	97.61143191	118.3806898	115.332688	113.5113373	152.755389	138.6243395	152.6864032	121.3121181	127.461407	125.8493541
ZNF358	130.1046204	144.9549615	132.9223761	94.13117439	95.01744747	87.33120592	118.3806898	112.9990127	107.4900309	123.7035566	127.9561121	128.4383203	100.3227493	104.6301482	118.6248907
ADCK3	177.181509	221.1865532	193.2489844	82.05711585	76.23991172	72.43293297	118.3424902	104.7287951	102.5564444	116.652912	113.4267725	125.9321573	117.894309	125.0601884	138.9012852
PRAME	109.006814	110.5297051	109.6952711	148.5921801	146.0518288	142.5190548	118.3042905	115.209863	116.813344	135.6600206	135.0785741	138.9972774	116.6076044	110.1017774	109.0454917
NCAPD3	124.5561372	51.02675035	95.42495869	131.6018264	153.9602101	146.9342418	118.2278913	130.276398	132.4298935	118.9322945	112.9741216	116.6890724	123.6040607	127.146493	98.26866784
POMGNT1	109.4510804	145.4940481	125.8682918	113.5207339	105.3801539	105.0894063	118.1132923	105.7932786	103.1391514	128.7115805	135.7575504	131.2362061	113.9939857	114.313751	148.7600833
CCNB2	58.44122261	56.49390218	52.11766274	60.24234067	43.94410855	50.95364478	118.0750927	113.2037211	107.3346424	99.55754356	93.58557449	96.91589066	67.35094395	68.13949829	76.39570685
MXD4	139.8227455	187.0698306	161.8542971	93.97133921	94.8616173	90.17323396	118.036893	107.1852954	101.7018073	191.2475412	194.5274806	204.6348806	99.96086367	108.6846648	119.9021439
CXorf57	112.84366	57.38390364	100.8021779	111.2553534	136.8188911	148.4457473	117.8076952	161.3920682	178.1918221	153.5642022	157.4470729	167.1165358	192.2014997	172.6121895	123.0154485
GET4	78.95825169	95.78110947	84.21552487	149.7248704	139.3511314	146.0193833	117.7312959	109.9693291	111.2193562	90.69736335	92.03901723	88.95981754	112.5866526	119.7066518	137.3047187
MAPK8IP2	28.756151	38.05815766	32.13922536	133.447692	126.9236752	121.6364135	117.5784973	106.8987037	111.0639676	78.41810946	84.87204458	74.52968493	71.05021967	70.06834601	85.21673674
ATXN7L3	90.22646255	108.5801781	99.6853708	116.2475808	100.1598431	100.3162312	117.5784973	103.4596033	100.8471703	106.0280486	102.1859417	109.4350057	114.9590142	110.5741483	123.0553627
BABAM1	136.1943008	173.4782369	152.4809768	101.352704	91.4746485	93.33824686	117.4520565	108.0114983	107.2880258	114.4941162	117.8212583	119.9939627	116.9610461	118.7713575	140.9951821
ACOT7	137.1167593	184.1455401	154.6984592	129.9657182	126.8068026	120.9204373	117.3492995	100.3480363	99.64290903	122.645482	128.477415	122.2271233	121.3925372	122.8951552	158.3394823
FSD1	91.55926168	121.4640087	107.6684731	109.3255848	104.2503852	105.5667238	117.2729002	110.6243958	104.4988013	96.21199833	93.43469085	89.15481933	127.9064792	126.5560295	154.4278944
ARMCX3	40.79173105	16.74050365	37.51644453	178.2518841	239.6278472	239.0167459	117.2347006	156.9703677	179.862249	80.18279265	81.17539553	81.47174873	165.8240554	142.931553	93.91802414
C19orf53	124.5157493	152.4445357	139.9301336	117.7997859	111.6523183	113.3231335	117.2327906	108.6182539	104.0714828	111.0625427	111.877952	115.0510573	117.8540995	117.5416187	142.6109074
CDC42	169.5885928	104.0877898	152.4234819	122.162741	123.4954114	123.4263542	117.1201016	130.276398	141.1316524	159.7405933	145.7158703	156.3524369	116.1652997	107.1888237	102.1004274
PSMD13	120.0326977	163.5483635	130.4596098	167.386448	127.1184629	140.8484435	117.081902	102.8454783	99.64290903	120.1822784	114.9733297	113.5300433	117.4922139	124.4697248	169.7948469
PLXND1	212.5612679	252.1670802	243.9189343	106.5148349	112.0808513	106.4418059	117.081902	106.612112	92.61157705	137.2408826	151.8266575	147.4603552	149.7000384	160.7241892	130.6789677
GPSM1	106.3412157	137.484035	119.8706243	86.7976343	87.73238692	86.35469384	117.0055027	104.8925618	103.5276228	111.2485697	112.370587	112.3990329	136.9536209	141.7506258	149.8377657
CECR5	74.47520006	92.60253283	82.35417978	120.0651664	102.302508	104.6916417	116.9673031	109.8055624	106.5965467	76.17549123	75.59270104	82.44675769	85.04313221	89.6717372	106.0918437
LARS2	87.92435495	93.9163445	91.08182012	115.324648	99.3027772	100.7139958	116.8527041	100.3070946	108.927375	87.20476119	80.68502371	88.88181682	105.952082	110.849698	111.0012857
CNOT11	69.74982132	52.29818101	58.1566935	104.5011634	80.91481689	88.42306974	116.7763049	123.8485556	119.5714908	73.41817374	73.29172561	74.02268027	110.9380623	108.724029	101.6613716
NACC1	120.0326977	150.8764379	137.7809005	141.7121357	136.7799336	127.4437766	116.7763049	110.7881625	106.946171	132.09389	139.5296413	147.655357	124.3680416	133.9565065	129.0424871
RHOC	195.8810848	241.8684919	218.8652293	114.9470846	109.3538233	114.3573214	116.7682829	100.1715777	98.51634202	161.2633679	160.6522185	157.7474797	121.3523277	122.8054047	141.5356199
NDUFS5	179.4836166	192.6641255	193.8280695	101.648462	86.40783046	89.21859893	116.6999056	106.120812	114.0551972	139.5937935	131.2687623	133.3812258	110.5761766	109.5900423	134.1115857
GLRX3	104.4833745	72.72583356	88.18639442	150.8156091	123.1447935	128.4381881	116.6617059	115.7830464	124.4662302	112.6456106	103.8456617	103.9749555	113.3908429	111.1252476	147.6424867
BAZ2A	226.2931377	170.1598029	200.1152796	108.8641184	138.2213627	129.9496936	116.6235063	122.9068972	121.3584592	179.1153442	181.3244081	183.1456831	164.1754652	160.6060965	93.07982673
POLR2D	86.63194367	78.6167956	76.27378579	131.3501174	112.704172	114.3573214	116.5853067	122.2108888	114.0551972	109.4471223	106.2597998	103.5069512	115.6023665	117.5809829	104.8145905
CARS	78.47359746	95.2725372	84.91869969	158.4927319	137.6369996	139.7347027	116.5853067	107.3490621	98.43864775	122.0940185	117.1988633	109.0060018	121.3121181	118.919367	145.2077228
CCT6A	141.9229138	65.60582188	112.0116117	149.4731614	169.3873971	177.1643512	116.5089074	143.2549078	158.3409346	165.512578	160.1629783	164.6985136	166.2663601	160.6454607	121.6184529
PHPT1	123.3041138	157.9116876	137.6568108	132.1891473	119.1321666	126.4891416	116.4707077	101.4125198	108.3446679	98.56490926	93.77417903	98.51490535	108.123396	109.3144926	142.293989
URB2	50.40403996	46.57674306	48.84996801	89.18886927	88.39466515	87.11044657	116.4325081	113.6540795	112.9286302	68.63882342	71.36795926	73.39867453	110.0534529	108.8027575	93.59871084
HSPA13	48.06154451	46.19531386	73.33699686	163.2752019	157.1936862	156.9579097	116.2797095	131.9140649	152.1642396	90.84442028	89.3231118	78.66372292	113.9135667	96.95412148	95.95364643
ATPIF1	85.90496233	90.86491093	86.49050222	133.1540315	115.3922425	117.7383205	116.2797095	112.6305377	111.6466747	96.21199833	97.093619	93.28885732	114.4362904	112.5817245	129.8008561
PPT1	120.4769641	107.8597007	114.2452258	139.4467552	106.0034746	108.7488406	116.2415099	113.2446628	107.4511838	138.9320373	134.8145277	133.8492301	129.1127648	132.9330362	142.7729589
SLC25A1	120.2750248	149.2235781	128.8050808	122.8759163	108.9642479	107.1180058	116.2415099	104.1556117	97.11784506	115.4764565	118.8585833	117.8590831	87.09381767	92.74214787	106.8102986
HECTD4	80.33143868	30.21766861	48.56042544	114.0241518	186.2949708	159.4240502	116.1651106	134.4933902	130.1767595	110.0721143	115.4637015	120.9011111	141.5777156	139.1132218	59.51201615
SMS	112.3590057	73.53107298	90.58546143	144.0194676	122.4046002	133.2113633	116.1651106	127.8198977	117.0464269	147.4613394	132.0609014	134.3562347	121.99568	125.9655659	107.0497836
ATP5L	141.3978717	168.3798	145.5158234	143.6838557	109.0032054	118.215638	116.1651106	110.0512124	116.4637198	128.7115805	117.5006306	128.6621824	117.4117948	112.7391815	159.4171647
MED15	95.19416841	97.64587443	95.30086901	87.84642157	96.18617376	89.81524583	116.0887113	115.087038	108.655445	116.652912	118.5190951	118.8730924	94.00985489	94.08053201	83.18111446
DPYSL3	75.20218141	55.68866276	66.59479128	121.4915171	104.7568332	107.9930879	116.0887113	110.1740374	110.2093306	111.3220982	109.8432861	109.357005	111.0989004	114.7073934	89.16823882
POMGNT2	120.3558005	148.8845299	135.8781921	94.89427201	89.17381601	92.55982154	116.0887113	102.5588866	99.64290903	110.5500493	112.0688198	118.4050881	94.37174056	94.27735321	109.0454917
PCNP	147.6579888	64.80058247	119.622445	183.8314323	193.8916917	202.1837443	116.0505117	147.5128416	160.5940686	118.1970098	126.025556	128.8961846	166.025103	151.5916857	109.4446333
LASP1	149.7581572	182.3231562	164.7083596	126.9032594	114.1845586	111.1354282	116.0505117	101.6172281	100.8083232	154.2627226	154.6180048	155.3384276	120.2666707	121.714228	136.4266071
SEC31A	94.99222915	40.00768466	66.05706936	114.1080548	116.8726291	115.3119564	116.012312	123.4391389	122.0188605	99.92518589	100.728783	107.4459874	102.243156	99.94580367	81.90386126
MRPS11	47.57689028	69.84392407	59.97667538	91.53815275	75.30493069	79.95068384	116.012312	100.9621614	93.69929691	90.80765605	92.52938904	94.02986413	89.38576024	91.56122069	115.272101
RNPEP	149.798545	175.5421927	163.3433731	125.5608117	111.4575306	110.1807932	115.9741124	111.0338125	105.3922855	153.0127387	159.5971647	154.7924225	121.1512801	121.4386783	133.7922724
MAGED4B	79.32174237	96.33206275	79.13612092	86.5077495	88.16091989	81.91961859	115.9462267	106.2006482	105.6937392	119.7411076	118.4436533	115.1551883	80.47693926	91.91549885	89.52068087
GADD45GIP1	101.8581641	128.3721153	114.5347684	133.5735465	120.807341	128.0404235	115.8977131	105.3429202	108.4223622	96.91051876	94.98124811	98.67090679	115.2404808	120.6513936	143.8107272
GLG1	83.804794	60.30819415	67.54614544	117.9675919	123.3395813	113.2435805	115.8213138	114.3091462	117.5902868	103.564845	103.5816153	104.7159623	114.3960809	118.8012743	83.42059943
RMND5B	63.85319485	74.46345546	69.24203764	116.4992897	108.4577998	103.0608069	115.8213138	106.0798703	101.313336	85.1091999	85.06064912	83.07076342	102.4940634	107.2675522	112.9969938
TMEM43	71.44611112	57.25676057	74.16426135	126.6893068	119.0932091	117.6587676	115.7449145	118.56708	114.8709871	117.755839	109.881007	105.219457	116.5271854	117.0298835	109.1652342
DPYSL5	154.7662509	188.6379284	170.7060271	124.7217819	123.534369	113.283357	115.7449145	102.1085282	99.33213192	140.292314	143.5657785	150.0733792	123.8855273	125.8081089	130.6789677
NAT8L	69.02283997	77.6420321	66.63615451	126.1481326	116.3272235	113.3629099	115.7067149	105.1791535	101.8571959	113.1603098	116.7839333	116.3380691	128.1075268	132.9724005	135.428753
ANKRD52	86.91465864	105.0625533	97.12085089	111.6748683	125.5991188	110.3001225	115.6303156	111.4841709	106.674241	192.5342894	202.5235588	211.3429422	130.6407265	129.3115262	99.70557769
RNASEK	186.3091637	224.9970309	194.6884246	113.7229401	100.8201735	98.80154358	115.6238217	104.1138512	98.35629182	119.0400137	123.4952374	123.5468954	101.7127924	106.2775416	131.9083239
TICRR	68.86128856	34.41338977	44.96182492	81.8054069	95.99138604	94.19065639	115.592116	123.930439	121.863472	133.674752	140.6989895	142.7023114	114.5971285	118.7225458	71.2467799
MAP2K7	114.9034404	151.3426292	134.6786586	117.3383195	108.8473752	101.8675131	115.3629181	101.5353448	97.38977502	121.2484412	122.5929533	127.4141709	118.3768233	122.6196055	128.7231738
AGPAT6	61.79341437	66.58058539	65.89161647	107.7733797	99.45860738	100.7935487	115.2865188	110.1740374	106.3246168	89.11650132	81.89209279	83.69476915	113.6723096	113.4477378	103.9763931
TOMM70	110.7031038	40.55863795	75.7774271	150.1863368	177.2178633	173.9424579	115.1719199	145.7114081	162.7306612	95.69729907	102.4122671	99.95791861	148.895848	134.7437912	123.4545043
RNF216	55.49290937	49.7553197	53.77219172	95.14598095	96.61470673	96.37836166	115.0955206	113.2856044	108.1504323	89.19002979	88.04060091	85.87878923	101.8507111	108.0154727	90.52532034
KDM3B	130.9778057	55.1800905	83.09871782	128.7071735	160.0375868	146.775136	115.057321	129.9488646	126.2531986	126.7998404	124.7053242	133.6152279	133.6564404	135.8459899	78.51115745
LAMA5	129.4430674	138.7978467	140.1799675	150.7736576	176.3607973	147.809324	114.8281231	114.9232713	105.1203555	194.9239645	205.1640224	206.0778939	181.5861868	190.6410111	129.9605128
PYGO2	90.99383175	104.7235051	98.98219598	127.7003377	117.8076101	116.1472621	114.8281231	111.4841709	108.4612094	86.39594806	84.19306822	87.04879998	108.8069578	108.2910224	111.4403414
RFC2	124.5561372	162.5312189	130.7077891	126.2320356	103.6270645	108.4306289	114.8281231	110.6243958	103.9937885	148.343681	150.9590766	136.6962562	110.4555481	116.9905193	135.1892681
HADH	120.7596791	130.8302146	124.04831	105.2562902	77.13593521	84.16698856	114.6753246	102.4770032	101.5464188	116.3220339	116.8216542	116.0260663	91.79833136	101.8352872	112.6776805
SYNGR2	160.9859802	187.3241167	166.5283414	139.3628522	128.1703166	129.8303642	114.522526	106.0798703	102.7506801	132.8659389	137.568154	134.3952351	118.819128	124.7059102	136.1072938
PI4K2A	61.76998941	78.47439537	70.08915648	94.03258839	84.75875766	86.36384243	114.4415428	103.4186617	99.27424969	74.10162083	67.56644608	70.10509427	83.10382712	81.72370364	96.33961638
SRSF6	42.64957227	11.99382919	26.1001946	140.7052999	212.8250576	224.9358792	114.2933282	177.9325034	206.5113857	136.1379556	150.5064257	149.1373706	130.4396789	114.1956583	74.24034208
BCLAF1	45.55749765	31.48909926	61.21757211	118.9744277	167.0499445	163.8790136	114.1787292	145.6295247	157.2920619	144.8510789	157.1453057	154.0904161	138.3207446	121.2024929	89.08841049
OAZ2	97.57705171	125.4478248	108.4130111	103.4104246	76.90218996	82.0588362	114.1023299	103.5414867	104.7707312	120.6969777	114.8224461	118.8730924	69.52225796	66.52556447	78.79055659
EHMT2	191.8019117	227.7132306	212.8137895	49.2930016	48.26839582	46.45890484	114.0641303	101.1259281	93.97122688	168.8581232	175.8925973	187.9037268	93.92943586	100.3394461	100.264376
GPR108	77.82739182	98.49349487	88.02094152	134.2867218	123.4954114	124.1821069	113.987731	99.65202789	103.6830114	86.7635904	89.43627453	84.86477991	109.3698911	113.6839232	144.1699546
PTTG1IP	191.8826874	209.4893912	195.1516927	126.693502	104.4451729	105.4871709	113.9113317	109.1504956	105.5088269	159.0420729	147.1492648	147.7333577	115.0796427	122.1865989	135.5085814
PPP1R10	24.83852931	32.76052992	28.00290292	97.24355549	95.60181061	87.66731701	113.8731321	111.4022875	107.8396551	88.89591592	88.26692636	85.17678277	98.59374003	91.40376373	85.65579252
VPS51	167.8519151	218.2198817	184.7281602	126.777405	116.5220112	116.8234619	113.8731321	102.5179449	100.4975461	155.8803488	162.1621865	170.5875677	111.5009956	123.68244	133.951929
CD164	137.6014136	65.69058393	124.9169377	108.1509431	129.2221703	128.9950586	113.7585332	152.7124339	175.3171339	131.946833	136.776015	147.8893591	119.1810136	108.2516582	66.33733792
B3GALT6	31.9871792	40.68578101	35.65509943	105.0465328	94.39412678	96.33858521	113.7203335	106.2026953	107.6065723	67.90353875	68.80293747	65.832605	93.40671211	99.15851888	108.1673801
ALDH1A2	81.4219107	50.77246422	66.76024418	61.79454583	56.13781952	56.00525515	113.7203335	98.30095274	105.3145912	139.3364439	126.6290905	131.2752064	60.23385912	61.52630608	58.87338955
STK24	120.2750248	130.8725956	119.7051714	133.8252554	99.96505543	102.7028187	113.6057346	106.5302287	109.2769993	107.6824391	104.7132426	103.4289505	108.7265388	114.5105722	118.6248907
GMDS	60.29906383	73.61583502	63.49254945	98.12453679	81.38230741	81.06442471	113.6057346	106.1617536	104.421107	54.3375367	54.01634126	50.11546056	73.78446695	67.94267709	87.1725307
PPM1F	85.01642957	117.7768598	99.64400757	100.0962569	86.48574554	90.01412813	113.567535	102.3951199	106.3246168	141.1746556	152.1661457	144.1063243	84.48019895	87.11306165	98.26866784
ZMYND19	76.17148987	100.5701649	86.24232287	121.4076141	107.6396914	110.4592284	113.567535	102.0266448	98.82711913	73.7122876	71.78288926	70.59064873	114.6775475	118.2108107	143.9304696
EIF2S2	118.2152444	74.59059852	103.8630565	120.9880992	129.7286183	131.8589636	113.4911357	132.1187732	142.1805252	165.2184641	158.5032584	158.7314587	129.0323457	131.4371951	111.1210281
USP36	73.78860657	69.80154305	72.09610013	121.7012746	138.2603202	139.854032	113.4911357	114.2272629	113.0063245	117.5352536	123.4982551	116.0650666	116.2457188	123.8398969	93.75836749
PTPN13	60.86449376	13.98573722	43.51411207	85.62299256	167.6732652	156.4408157	113.452936	175.8854198	194.8960915	105.770699	115.1996552	112.6720355	137.8382304	121.7929565	57.4364797
HERC2	96.00192546	36.06624963	52.40720531	91.83181318	156.9209834	140.6097848	113.452936	139.1607407	133.2456834	140.292314	145.1123358	147.0313512	145.3976199	144.3486656	63.14420493
TMEM183A	187.1169208	221.8222686	203.3416111	138.1043074	111.340658	114.9141918	113.452936	103.7052533	109.4712349	165.7699276	156.994422	151.5553928	138.8434683	134.3107846	161.7721002
WDR45B	119.4672678	112.224946	121.8560591	130.3013302	114.7299642	121.2386489	113.3765367	112.098296	104.6541898	134.4468009	130.7783905	132.75722	122.5184037	128.2093275	120.7802554
FAF2	56.86609636	24.87765985	38.55052514	138.1882104	150.3761161	143.7521251	113.3001375	122.3337138	121.1253764	101.8001618	95.13213175	92.43084944	113.7929381	109.5506781	85.69570669
SLC39A9	65.18599398	15.55383503	32.34604148	112.3041407	136.9357638	129.551929	113.2619378	131.0542898	143.4624807	68.60205919	62.23949936	61.69856701	98.87520667	87.82161795	63.86265985
DTD1	93.62429258	115.2734129	100.7504738	109.9376571	88.94007075	95.51799684	113.245512	106.6522348	105.3013832	115.6668953	113.7515495	106.2650566	104.127374	105.1284994	129.6667446
GGA2	132.270217	144.5192846	139.6008823	131.14036	124.1576897	121.3182018	113.1855385	106.8987037	107.7619609	91.46941225	88.26692636	91.02683654	118.7387089	119.6672876	116.748925
TM9SF3	118.9826135	44.88150218	93.43952391	147.9209563	206.6697658	201.2291092	113.0709396	172.7738528	197.4211554	129.7042148	137.1155031	138.3342713	164.2156747	143.6401093	76.67510598
MESDC2	55.21019441	43.65245254	52.69674788	117.2951095	108.4161152	112.0502868	112.9945403	116.2743464	119.4549494	93.08703851	92.33889846	95.35470631	114.5167095	118.7186094	97.70986957
JAGN1	44.87090416	59.50295473	51.78675695	129.7140093	108.3019696	108.86817	112.9945403	107.4718871	99.87599186	79.04310142	78.15772283	78.66372292	102.5744824	112.3455391	127.0467789
GTPBP3	112.84366	141.1288029	121.8146959	89.39862672	94.66682958	87.98552868	112.9563407	112.3848877	109.8208592	111.6897405	104.9018471	108.6159982	119.985204	124.3122678	122.4566503
LMNA	127.2621233	160.751216	137.6568108	105.8016596	100.6273337	97.29322024	112.9563407	99.07884449	99.09904909	153.380381	151.9398202	136.8132573	96.86473073	101.9533799	114.3141611
HIC2	93.65943001	105.3168394	98.07220505	96.61428313	87.34281149	88.6617285	112.918141	105.7113952	99.91483899	99.70460049	100.9788726	102.6879437	86.28962729	90.14410808	82.62231618
TMEM14C	93.78059357	127.3125898	106.7998454	105.8855626	66.77322877	74.30242657	112.8799414	98.34189441	104.9261198	81.39601235	73.97070196	73.08667167	85.12355125	88.25462459	125.8493541
C11orf58	47.94038095	31.3619562	45.83045263	238.4522732	245.8610541	255.6035295	112.7271428	129.785098	140.0050854	92.31498961	90.37929725	81.97875338	143.0654678	132.5787581	109.364805
CTNND1	100.6465285	52.07568065	69.65153356	136.3507351	147.3230135	149.3606059	112.6125439	114.0225545	111.8020632	111.763269	111.9043566	108.1869942	116.1713312	115.1931481	81.90386126
TRIM11	75.04063	82.77013575	70.81384017	116.0378233	111.7302334	109.1863817	112.6125439	105.5066869	108.8496807	91.61646918	93.6232954	90.8708351	98.03080677	97.50522083	108.5266076
RBM5	25.16163213	11.2309708	14.84939756	128.6232705	152.7135687	154.2928869	112.5743443	128.1883728	136.0038302	84.04303714	91.17143633	83.88977095	101.6496635	96.08810821	72.60386142
ABCE1	68.61896145	31.15005109	55.01308845	140.9570088	169.738015	177.4825628	112.497945	148.2497917	167.198082	84.63126487	86.19227638	80.76974227	158.0234088	146.3562418	98.66780947
ISYNA1	187.2784722	221.3560773	203.6311537	59.44526235	62.87747446	62.21038285	112.4597453	105.1382118	93.23313125	101.8001618	108.5984962	112.6330351	121.0306515	129.941354	132.1158776
PNP	128.8372496	162.9974102	145.2262809	115.8700174	101.8350175	97.57165545	112.4597453	98.42377775	95.79704236	112.2044398	105.1658935	109.0060018	118.9397565	124.8240029	143.9703838
PFDN1	110.7838795	108.368273	116.3547502	141.7960386	130.9363021	130.5861169	112.3833461	104.3603201	106.7519353	79.70485762	75.36637559	71.05865303	134.2193737	128.8391553	152.6716712
GIT1	177.5853876	221.1441722	204.1688756	109.7031482	112.4314692	104.9303005	112.3833461	103.3367783	92.61157705	130.0350929	133.4188541	131.119205	116.5271854	118.1320822	119.8223155
SHKBP1	132.6740956	164.65027	152.0098497	82.18297032	81.69396775	78.08119024	112.3833461	98.26001107	93.62160263	116.9102616	120.5183033	124.0601401	101.4888254	111.676347	117.227895
SRPK1	123.1021745	27.92909342	73.95744522	120.5685843	183.5289853	175.4937399	112.3451464	177.482145	202.5489776	111.6529763	122.5175115	116.5720713	165.1002841	147.4978048	89.84677958
CDK1	82.31044345	91.24634013	117.5129205	124.134461	103.159574	102.1857248	112.2305475	110.7881625	138.2958114	75.9181416	73.78209742	72.11166271	91.63749329	83.33409467	92.161801
AP2A1	175.000565	218.8979781	193.7039799	95.69135033	98.05613583	93.39512719	112.1541482	105.6295119	99.4098262	120.1822784	120.8577915	127.7261738	103.3384633	104.0790488	105.5330454
CHMP4B	86.67233153	94.25539268	85.91141707	134.7481882	120.5735957	123.8241188	112.1159486	111.8117043	106.2469225	107.4250895	111.0503552	108.0699932	105.1478916	108.2516582	115.3120152
UBE2R2	106.7854821	99.34111531	94.22542518	131.8535353	111.1069127	114.3573214	112.0013496	111.6479376	105.9361454	108.3074311	107.9572407	103.2729491	119.0603851	120.6120293	102.2999982
ARCN1	116.3574031	40.55863795	80.41010823	139.4887066	176.9062029	167.4986715	111.9249504	137.0317738	129.477511	139.4099724	132.6644359	126.4001616	136.6721543	141.5144404	99.94506267
CTH	14.49923906	13.68907007	13.77395372	175.8186976	171.958595	162.2084023	111.9249504	120.4913386	124.9323959	23.74969466	25.38617156	20.47518817	88.05884612	79.90940585	83.50042775
RSL1D1	147.8195403	59.33343064	79.83102309	161.7649482	187.6584848	186.5118192	111.7721518	133.9202068	141.0539582	94.30025821	86.2677182	84.16277346	154.5251807	145.9232352	145.9261778
HN1	194.2251828	236.316578	196.5166791	160.5903065	117.7686526	121.9148487	111.7339522	104.7287951	97.54516357	148.8951445	149.1107521	139.6992838	118.1355662	119.4704664	141.815019
CALCOCO2	69.62865776	29.6243343	50.09086475	117.8417374	137.8317873	128.597294	111.6575529	129.907923	127.6516955	81.50630505	77.81823465	75.07568995	99.43813993	94.31671744	74.958797
MRPL3	127.1005719	92.51777078	121.9801487	114.1500062	96.34200393	108.4704054	111.6575529	115.4145713	124.4273831	147.7922175	136.7005731	137.7102656	132.8924595	132.736215	145.0879803
DRG2	84.37022393	104.2149328	89.46865437	95.8172048	86.29095783	86.63312906	111.6193532	98.30095274	95.79704236	75.18285693	81.43944189	83.81177023	103.6199299	105.4567972	126.7673798
UBQLN1	96.6481311	28.2681416	61.50711468	136.6779568	174.9193682	173.1469287	111.5811536	156.3153009	157.6805332	115.1088142	114.030307	118.5610896	145.2367818	137.1056456	96.43261637
CRTC3	112.4397814	120.6163883	126.1164712	84.65810827	81.77188284	84.24654148	111.5811536	109.9283874	105.0038141	104.9986501	117.349747	112.2820319	100.5640065	103.5673137	90.80471947
GRK6	124.3541979	161.8531226	138.2358959	138.0204045	124.46935	125.574283	111.5811536	92.44629375	95.71934809	128.8586374	132.5889941	124.2551419	108.0027674	118.092718	143.2120147
MCMBP	114.9034404	49.7553197	81.27873594	105.5499506	126.9236752	130.3872346	111.5047543	134.7799818	140.5489454	109.9250573	107.429148	105.1839666	116.7684425	115.3372212	99.2665219
HNRNPH3	78.83708814	28.6495708	57.32942902	108.8221669	176.47767	185.71629	111.428355	174.0021029	192.3321803	97.46198226	96.30147991	98.24190284	148.2524957	132.4213011	79.9480673
UBE2V1	140.1006139	130.5666046	131.9482722	92.74551665	82.29780967	88.72298425	111.4023793	111.4935875	99.93426256	169.183119	166.2914944	174.6829953	109.6754834	112.4348959	98.65423865
FDPS	179.9682709	236.4861021	197.9230287	110.9197415	89.83609424	91.40630421	111.3901554	101.2078114	100.0313804	169.3728224	162.6902792	162.9824978	110.1338719	115.3372212	136.6660921
SLC39A7	158.1992184	163.8450306	161.0270326	98.62795468	98.71841406	96.45791458	111.2755565	106.6530537	103.9549413	146.284884	140.2463386	142.1953068	105.1478916	106.1259892	91.2038611
TAOK2	70.11331199	73.65821604	71.35156209	95.06207797	108.4967574	99.95824303	111.1991572	107.7994205	99.21559051	151.2112912	152.0907039	157.132444	100.8856826	99.67025399	85.85536334
TJAP1	43.21500221	43.35578539	45.54091006	67.54190006	74.99327035	67.34154614	111.0463586	107.4718871	105.9749925	56.13898412	63.7106148	60.52855626	70.16561026	71.052452	69.57038507
CLSTN3	154.2815967	176.7712423	172.2364664	102.0679769	112.3145966	102.3846071	111.0463586	100.6755697	92.7669656	139.1158585	136.0593177	133.9272308	113.0289573	123.2494334	110.0433458
NUP133	98.14248164	23.64861021	49.30496348	128.7910765	162.2581668	168.6124123	110.9699593	142.108541	145.5602262	121.4322623	113.3136097	120.7061093	138.6424207	136.5545463	86.33433329
PUM1	64.82250331	14.62145255	36.06873168	113.185122	179.6332309	164.9529781	110.9317597	157.0113094	158.3409346	116.2852697	115.0487715	114.8560555	139.3259826	132.9330362	72.96308888
RNF123	146.0020869	172.321235	159.7447726	89.39862672	86.09617011	86.03648216	110.89356	102.2722949	90.94115011	114.5205865	118.8963042	116.650072	108.9677959	109.4719496	110.7618007
IPO13	56.82570851	67.08915765	68.33204671	84.36444784	85.82346731	78.08119024	110.7025618	96.70422756	96.84591509	83.52833787	81.4771628	85.09878206	88.4609413	93.68688962	101.9407708
OBSL1	148.5465216	178.9750554	156.2288986	84.70005976	91.7839714	91.44608067	110.6643622	106.4074037	104.0714828	153.2700883	153.6372611	157.8734509	108.8069578	119.8641088	106.5308995
LY6E	151.5756105	191.4774569	166.4042518	113.9822003	104.7957908	108.1124173	110.5879629	101.5353448	97.19553933	110.9176916	110.5977043	112.4380333	119.5026898	130.8467315	153.1905553
FAM189B	166.0748496	180.034581	176.6623314	99.97040238	100.1988007	93.47468011	110.5115636	102.1904115	97.38977502	118.4911237	123.8000224	135.1752423	122.9607084	130.256268	115.2321869
BCAT2	115.3477068	140.8745168	123.138319	87.2591007	85.9013824	89.29815185	110.5115636	101.3715781	93.5827555	75.77108466	75.06460832	75.38769281	109.5709387	115.0616716	122.137337
MRPL55	84.12789682	101.3754044	92.15726396	74.37999305	66.81218631	69.96679248	110.5115636	96.04916082	95.8358895	86.24889113	88.56869363	85.83978887	103.8209775	108.724029	128.7231738
ARRB2	108.1990569	135.8311752	119.9119875	91.41229828	87.65447183	89.61636353	110.2441661	98.54660277	95.44741812	69.63145772	67.74675203	69.65464013	116.3261378	121.5567711	145.9261778
TRMT1	74.15209724	87.72871531	81.98191076	88.51764542	84.26516559	86.3944703	110.1295672	101.0849864	108.6165979	61.43303371	61.975453	63.18058063	114.1548238	119.5885591	128.044633
MRPS21	118.7806743	125.2359197	124.1310364	89.44057821	82.23937335	89.61636353	110.0531679	104.1556117	106.5188525	114.6676434	105.9957535	111.1900218	114.0341952	109.5113138	130.4394827
PACS2	51.37334842	61.15581458	58.03260383	90.82497741	97.58864531	92.63937446	110.0531679	106.8168204	101.4298774	63.82270887	63.18252207	62.67357597	100.0412827	106.244082	104.934333
PFDN5	208.3609312	257.2104218	228.3249987	103.2426187	86.9921936	89.97435167	110.0149683	90.48109353	95.13664102	172.7183677	165.4439056	163.4505021	111.7422527	111.7550755	146.2055769
SV2A	77.06002262	92.39062772	83.80189263	87.76251858	86.25200029	85.55916465	109.938569	104.8516201	97.11784506	115.4029281	114.2566325	112.3600326	82.38930397	86.24704838	82.38283121
NUTF2	106.8258699	128.0330671	120.2842565	116.0797748	98.99111686	108.1124173	109.9003693	107.0624704	96.06897233	108.0868457	113.7285397	112.1650308	97.26682592	101.323552	118.5450623
GINS2	100.6061406	119.0906715	106.4689396	117.380271	92.75790997	96.85567918	109.9003693	99.93861959	102.439903	114.1161799	105.6562653	103.0389469	90.14974109	95.26145919	114.3540753
SLC46A1	47.21339961	52.55246714	48.47769899	121.994935	107.3669886	111.1752046	109.9003693	99.40637786	96.72937368	64.5212293	70.83986654	67.74362256	87.97842708	88.21526035	80.10772395
PTP4A1	88.48978489	23.8181343	57.20533934	112.5978011	141.8054567	135.5979509	109.8621697	154.4729257	169.1404389	118.858766	123.2342087	121.330115	147.6895625	140.6090629	77.11416177
RNF185	33.23920263	36.19339269	33.87648078	112.1782862	92.91374014	96.06014999	109.8621697	97.3592943	99.17674337	93.49144508	91.39776178	84.63077776	66.62717261	62.82532598	80.46695141
BAK1	71.00184475	98.40873282	87.73139895	77.52635485	66.18886562	71.00098043	109.8621697	95.72162745	89.27072318	83.52833787	86.64492729	79.20972794	78.24772354	83.01918076	100.264376
MALAT1	223.4256002	100.4430219	129.7564349	180.0138467	412.0928903	441.3993724	109.8239701	248.597828	191.2833076	182.2035398	217.2826188	195.9378007	311.9454467	284.3279007	139.100856
YY1AP1	107.4757105	93.71545846	103.0788097	99.64401979	94.36880438	95.32508101	109.7651426	105.754384	103.5983246	97.7575667	98.6669581	95.77981022	120.1416191	120.8080632	110.4524659
ZMYM3	82.10850419	96.50158684	98.27902117	90.53131697	87.2648964	82.17816558	109.7093711	103.0911283	98.05017637	87.31505389	95.54706174	98.98290965	105.4293582	107.5431019	94.47682242
CNIH1	63.93397055	47.84817371	66.05706936	118.4290583	110.5225496	117.4201088	109.6329719	130.9724064	135.5765117	83.63863057	81.5148837	82.91476199	94.49236912	92.38786972	84.85750928
FKRP	18.41686075	22.75860875	20.97115477	130.0915727	126.3003545	128.7563998	109.6329719	103.991845	104.149177	63.60212347	67.29410112	60.4895559	79.37359006	80.85414759	84.69785263
BTG1	74.75791503	38.18530072	49.42905316	128.4554646	109.042163	114.755086	109.5947722	112.1392376	115.4925413	62.90360304	56.09099124	58.69553941	111.0184813	112.1093536	96.5124447
CDK2	107.1893606	94.97587005	94.2667884	112.0524317	102.1077203	102.7425952	109.5183729	107.5537704	107.4511838	100.9913487	93.39696994	93.8738627	106.7562723	108.1729297	101.1424875
CTDSP1	58.80471328	72.04773721	64.40254039	94.4747571	89.60234899	88.6617285	109.5183729	96.2129275	94.78701677	95.4031852	97.01817718	94.18586557	87.29486526	98.05632018	100.5836893
B4GALT2	122.3348053	158.2507357	136.1263715	107.9831371	100.4715035	102.7425952	109.403774	100.2252113	95.79704236	114.1161799	114.8224461	115.4800613	117.4520043	123.7611685	140.4579375
MIB2	56.42182998	69.97106714	61.5484779	105.5499506	112.6262569	109.385264	109.3273747	107.4718871	103.4499286	81.91071161	84.90976549	80.80874263	91.2353981	101.0086381	103.8566506
SPTBN2	78.11010679	102.8163591	86.61459189	97.15965251	105.1853662	96.09992645	109.3273747	103.0911283	98.16671778	103.7119019	107.2405434	110.6050165	124.0463654	129.272162	114.1944186
CENPV	106.26044	131.1268817	118.5470011	95.35573841	84.03142033	88.58217558	109.2891751	97.27741096	99.06020196	139.667322	141.0384776	138.4902727	108.7265388	111.2039761	119.8223155
PRKACA	121.6885997	141.8068992	133.8513942	126.8193564	121.2748315	108.0726408	109.2509754	101.7809948	95.09779388	109.3735938	108.5984962	107.9139917	100.765054	98.33186986	103.9364789
CPD	131.8663385	33.26910218	84.83597324	163.1073959	262.1063496	244.9434384	109.1745762	179.4882869	194.7018558	117.2043755	126.7799741	134.2392337	183.5966627	158.559156	79.18969821
NSD1	74.55597577	11.2309708	30.15379059	108.1509431	213.7210811	197.9276631	109.1745762	164.6674019	169.3346746	124.5572221	132.0231805	129.2081874	164.4167223	157.6537785	63.66308904
NTPCR	94.10369639	114.5982832	96.87267154	99.21527555	82.47311861	83.09302415	109.1363765	102.8864199	101.4298774	78.93280872	80.1946519	75.73869604	94.05006441	94.51353864	119.2635173
LIG1	104.9276409	127.5244949	113.1284187	48.53787476	52.90434345	54.01643217	109.1363765	104.0737284	95.17548815	108.3809595	112.4837497	108.6549985	90.31057917	100.2213533	90.2459212
UBTF	91.31693457	104.469219	97.28630378	102.7811523	89.01798584	90.65055148	109.1363765	99.65202789	95.95243091	121.2116769	120.1410942	125.8541566	107.2387866	117.8958968	110.9214573
ADGRL1	141.317096	147.6554803	146.1362718	108.318749	127.9755289	120.3237904	109.0599772	112.9580711	106.1303811	115.2926354	121.3858842	119.8871018	150.1021336	157.5356858	106.3712428
GTPBP6	71.20378401	86.88109487	73.21290718	75.51268329	71.91562445	71.16008626	109.0599772	100.7983947	96.06897233	90.99147722	91.62408724	93.17185625	77.92604738	87.03433317	96.71201551
C21orf33	68.69731388	94.49145497	79.611798	104.9747957	83.98233383	90.1525502	109.0424054	100.2722942	94.87442283	86.48087344	82.65669561	80.45344937	85.71141441	91.32227976	113.8918693
CDK5RAP3	79.20057881	78.36250947	70.27611825	86.46202237	111.3796155	117.4201088	109.0217776	123.6029056	124.9086991	99.98584687	103.9588244	102.3759408	129.7030405	132.1457514	118.465234
ACADVL	123.4252773	141.6373752	128.5569014	150.2702398	151.7396301	144.9454189	108.9453783	106.7758787	108.7331393	101.7633975	105.6562653	98.51490535	129.9169552	139.1132218	142.3738173
ARL2	123.1425624	154.987397	140.8417791	159.0381013	146.207659	147.7695475	108.9453783	98.54660277	99.91483899	64.0800585	67.57625352	66.9636154	128.9117172	133.3660429	158.8583664
TBCD	195.4772062	243.7332569	219.2664525	124.8476364	116.8336716	117.4996617	108.868979	102.7226532	100.9637117	171.6154407	184.5684063	195.8207996	109.9328243	115.6127709	111.7596547
MRPS26	117.8517537	137.7807022	125.9923815	124.0505581	113.0547899	120.2442374	108.6779808	102.3132365	98.55518916	132.3144754	131.6082505	133.7712294	109.8121958	114.8254861	115.7909851
CLTA	110.5011645	132.7797416	121.111521	98.71185766	84.49891085	85.24095297	108.6397812	101.003103	96.84591509	129.1895155	123.3850924	127.7261738	87.3752843	92.19104852	109.364805
CAMK1	96.72890681	132.8221226	111.8047955	93.97133921	81.1096046	87.90597577	108.6015815	99.11978617	95.36972384	95.7340633	92.56710995	91.96284514	86.61130344	87.97907491	117.6270366
SLC25A13	55.73523649	45.6867416	47.69179773	109.1997303	83.0964393	92.12228049	108.5633819	103.746195	107.9950437	95.69729907	90.56790179	90.01282722	85.52564643	92.11232004	89.68712293
DPF2	57.99695623	66.66534743	65.64343712	121.0300507	111.9639787	114.3573214	108.5633819	98.17812773	99.09904909	59.19041548	58.5051294	60.84055912	101.770292	100.8905454	111.2806848
ENAH	184.3301589	73.53107298	146.9221731	149.6829189	233.2777677	220.679798	108.5251822	163.5619768	176.7933251	158.270024	181.6638963	187.9037268	214.7992493	193.3571436	114.5137319
NRSN2	90.38801396	109.8516087	96.37631285	119.855409	115.002667	104.452983	108.5251822	101.2896947	95.0200996	96.6164049	96.82957264	96.05788277	114.9188047	118.2895392	133.1137316
CNPY3	105.8565615	133.5426	117.5542837	72.61803044	64.27994601	66.983558	108.334184	98.26001107	93.00004843	103.6016092	107.014218	108.1869942	75.75473337	76.48471703	88.36995557
TIMM44	65.26676969	88.19490655	74.37107747	102.2357829	89.48547636	90.61077502	108.334184	96.41763586	94.63162822	95.10907134	95.24529447	88.14081001	107.9625579	104.8663336	131.8763926
CDC42SE1	87.19737361	90.10205253	89.59274405	120.6105358	100.004013	99.64003135	108.2959844	101.2896947	104.8095784	92.38851808	89.85120453	85.60578672	97.2266164	96.91475724	100.024891
TELO2	50.2828764	61.5796248	56.08853228	76.14195566	78.49944922	76.13214372	108.2959844	97.15458594	90.66922014	67.20501832	67.70903112	68.17262651	74.1061431	80.73605487	80.54677974
AHCYL1	158.4819333	57.04485546	92.23999041	131.9374383	151.9733754	151.1107701	108.2577848	124.4626807	121.2419178	121.7631404	118.7831415	117.079076	163.2104367	166.3139112	115.3120152
LSM2	115.8727489	139.6030861	119.9533508	85.95860448	66.57844105	68.85305161	108.2577848	97.40023597	93.03889556	79.22692259	81.36400007	82.01775374	80.82113274	81.01160455	99.9051485
MED22	44.18431067	48.14484087	43.51411207	100.4318688	97.00428216	100.1173489	108.1049862	101.5762864	101.5464188	86.83711886	92.52938904	88.33581181	82.22846589	87.42797556	94.87596404
CHPF2	58.52199831	64.24962918	59.23213734	155.9995548	159.4921812	146.337595	108.1049862	98.87413614	95.0200996	126.6895477	128.100206	125.6981552	117.1705377	114.1956583	121.8180237
DOT1L	117.6094266	132.5254554	128.8050808	88.26593647	96.45887656	90.45166918	108.0667865	106.5302287	105.8584511	143.2702169	154.3162375	151.5163924	103.2178347	113.6839232	85.37639339
PQBP1	74.95985429	102.5196919	88.02094152	86.08445896	82.78477895	82.81458893	108.0667865	93.83831057	92.37849422	106.4692194	106.9764971	103.2339487	75.75473337	80.14559128	101.3819725
PRPF40A	85.70302307	61.83391093	103.7389668	129.7979123	152.8304413	155.0088631	107.9903873	132.5281899	153.1354181	116.4323266	116.1426779	120.238105	136.4308972	128.9966123	93.35922587
SDR39U1	60.7433302	71.03059268	68.24932026	99.25722704	90.03088196	95.62260893	107.9521876	100.1433279	102.3233616	64.00653003	63.78605661	61.23056271	98.99583522	109.2751284	111.5999981
SLC25A23	151.5756105	172.7026642	168.6792291	105.0884843	108.2630121	101.8277366	107.913988	107.2262371	98.24441206	114.2632368	118.6699788	114.7390545	120.9502325	120.2971154	109.0454917
LIG3	126.8986326	128.0754481	126.1991976	95.22988393	101.1727393	98.36718465	107.7993891	109.232379	104.9261198	129.7042148	127.7229969	133.3422254	110.8978528	116.3213272	103.6171656
ANKLE2	125.5658335	97.3915883	111.1843472	90.53131697	100.0429705	99.71958427	107.7229898	118.7308467	121.1642235	141.9834687	141.4911285	140.3232896	106.5552248	107.7792873	85.41630755
PTPRS	121.3654968	133.8392671	133.6859413	103.5782306	127.8976138	111.3740869	107.6847901	111.1975792	103.3333871	116.652912	125.1202542	121.2521143	131.9676406	140.5303344	88.48969806
EXT2	91.96314021	107.7325576	103.8216932	180.7689735	138.4940655	144.6272072	107.4937919	93.63360221	92.37849422	98.05020999	95.13213175	88.33581181	97.91017822	98.21377714	109.0055775
NELFCD	96.85007036	119.1754335	110.5638988	108.8641184	93.22540049	98.44673757	107.4173926	101.4534614	103.4499286	97.3884538	98.18752535	100.9329276	92.60252174	93.88371081	111.5600839
THOC6	55.33135796	73.23440582	66.38797516	93.34206685	85.9013824	83.45101229	107.4173926	95.43503575	94.51508681	41.65387624	41.30439503	45.04541397	82.79139916	83.92455826	97.82961206
ABCC1	137.3994743	150.5373897	145.9708189	119.6037	116.1324358	111.5729692	107.379193	102.4770032	102.8672215	72.16818981	77.85595556	74.646686	104.9870535	111.3614331	88.05064227
SCAMP3	92.89206082	104.8082671	101.6708056	107.8992341	100.0429705	100.9128781	107.3409934	98.91507781	92.06771711	92.05763998	97.20678172	101.088929	105.3891487	113.1328238	120.9798263
GGA3	43.25539006	52.72199123	48.35360932	130.2174272	133.8970754	129.3132702	107.2263944	106.366462	99.4098262	84.2268583	85.02292821	83.14876414	115.2806903	111.9912609	100.3442043
MRPS7	75.56567208	93.40777224	86.86277124	122.246644	97.70551794	105.2087357	107.0735959	95.55786076	94.63162822	109.557415	106.9764971	107.2119853	112.6268621	115.1797643	136.3068646
ISL2	47.81921739	50.81484524	48.51906222	66.9126277	60.96855485	59.62491297	107.0353962	97.03176093	101.896043	48.41849515	51.56448219	48.55544622	72.13587668	73.84731299	74.36008456
BRK1	149.9600964	170.8802803	159.2484139	94.89427201	89.68026407	84.68408254	106.8825976	101.2078114	91.64039859	166.946383	163.1052092	158.4194559	105.9118725	104.433327	113.795277
KIF7	59.69324604	65.22439269	59.72849603	69.38776565	91.62814122	84.84318837	106.844398	109.5599123	114.83214	124.6307506	128.7037405	127.2971699	97.70913062	101.5203732	74.04077126
FAAP100	78.87747599	93.9163445	83.51235006	119.1422336	119.9113175	112.766263	106.7679987	96.70422756	97.58401071	115.1455784	120.3296988	118.0930853	92.96440741	101.0086381	102.1403416
C17orf51	102.8307036	44.04659605	58.88716805	112.7886804	145.4659074	136.2435228	106.7057333	119.4514201	112.0052338	112.9220776	117.044962	117.7853724	118.7338838	116.6118353	75.42699012
APOBEC3C	75.24256926	90.18681458	80.03783921	85.58104107	70.39628027	71.43852148	106.6915994	97.76871101	94.98125246	86.57976923	87.39934546	81.54974944	70.04498171	71.32800167	84.77768095
UROS	72.77891026	91.67015034	75.36379485	94.85232052	72.03249708	77.04700229	106.6533998	91.62746032	94.51508681	54.227244	54.84620125	52.57248314	83.59558953	83.80646554	110.9613715
NAP1L4	78.83708814	44.83912116	58.94259477	160.464452	177.5295236	172.5105054	106.5770005	118.4851967	124.971243	130.0718571	130.2125768	129.9881946	114.4765	112.4636318	97.27081378
DNAJB1	102.5043697	107.9868438	99.80946047	146.4107026	116.9505442	127.6426589	106.5388009	99.85673625	97.19553933	126.1748484	116.8216542	128.9351849	86.85256055	87.34924708	112.1587964
CCDC86	93.01322437	112.6911372	102.0430746	121.8690805	111.8860636	112.2093926	106.5006012	98.66942778	96.37974943	68.96970152	70.651262	67.70462221	111.2195289	121.6354995	139.6197401
NANS	69.83059702	83.66013721	74.20562457	133.1540315	119.0542515	116.7836855	106.4242019	97.03176093	93.97122688	69.41087232	64.99312569	68.25062722	97.82975918	97.54458507	120.2613713
KHNYN	45.11323127	41.53340145	43.14184305	108.9060699	110.0550591	106.8395705	106.3860023	107.4309454	107.7619609	74.11669417	70.46265745	73.20367274	98.71436859	99.31597584	81.2253205
VAPB	49.5962829	34.71005693	41.5286773	103.7460365	113.3274927	109.1466052	106.3478027	120.6551053	121.0088349	87.64593199	85.06064912	80.84774299	130.7613551	133.5628641	110.9214573
TMEM184B	100.4849771	109.2582744	105.2280429	109.2836333	111.3796155	100.5548899	106.3478027	108.4954289	99.7206033	94.55760784	101.6955699	98.51490535	80.45924707	84.71184305	72.28454812
TTC4	44.30547422	55.26485254	46.74044357	128.4974161	98.64049897	102.5834894	106.3478027	89.74414344	95.8793983	58.05072425	59.63675666	52.41648171	89.18471264	88.9631809	108.6671054
FBXW4	57.02764777	68.57249342	62.49983207	84.49030231	76.90218996	83.84877688	106.2714034	98.2190694	100.2256161	57.09485419	57.10945577	54.09349712	77.24248557	76.36662431	83.42059943
HEXA	162.6891359	206.3531956	180.4462392	76.17258024	64.2659213	70.48388645	106.2714034	93.94598717	90.06592409	114.8124945	119.9702185	115.3240598	99.51775478	105.1159029	123.7239249
WDR26	81.62384996	18.94431678	49.63586928	122.162741	172.7377458	173.1071523	106.1950041	141.862891	153.3685009	106.3221625	111.7293316	106.8609821	159.3101134	146.8286127	76.31587852
TMUB1	238.5710449	270.984254	242.8848537	129.8818153	125.0147556	129.8701407	106.1568045	103.746195	104.4599541	122.9763601	127.8738805	126.7121645	145.558458	154.937646	154.5476368
ACP1	108.3606083	61.70676787	85.58051128	128.7910765	122.0150248	130.5463405	106.1186048	120.8188719	126.5639757	128.4542309	125.5351842	121.5641172	130.1180028	127.0677646	120.1017147
ZNF689	76.7369198	92.05157954	85.29096871	78.99465702	65.56554493	69.33036912	106.0422055	92.6510021	85.96871644	67.16825409	67.59586839	74.1786817	73.94530503	78.92529987	85.37639339
EGLN2	59.0470404	72.67879063	61.42438823	103.2845702	99.23187447	101.5890779	105.9276066	98.5056611	91.36846863	94.69069436	92.45960536	96.60388779	87.14689423	91.33763181	102.3798266
QPRT	221.2745432	284.9593959	239.9112515	116.2144391	99.03825549	97.90418666	105.7969638	98.71036945	92.34974733	109.6496932	107.7339329	107.4682176	111.0184813	113.156836	137.0217273
EIF5	21.12284687	6.908106568	15.30439303	126.9032594	174.9193682	178.5963037	105.7366084	145.1791664	160.7494571	62.46243224	65.37033478	80.1847369	137.6773923	139.6643212	73.16265969
MICU1	145.0327784	150.7916759	152.7957509	93.59377579	74.44786474	80.26889552	105.7366084	99.73391123	93.50506122	95.32965674	94.30227175	91.0658369	90.79309339	92.4665982	93.75836749
WDR83OS	124.5157493	149.9440554	133.9341206	103.0748127	97.35490005	103.935889	105.6984088	96.62234422	95.91358378	129.8145075	134.4373186	123.0071304	98.19164485	100.65436	117.5472083
TPD52L2	69.66904561	86.5420467	80.8651037	115.156842	96.73157936	99.91846657	105.6984088	99.52920288	91.05769152	104.4471866	100.7148262	97.11089245	105.8314534	102.8587574	114.5137319
TYRO3	114.7015012	151.5121533	130.7905155	93.80353325	84.73265611	84.56475316	105.5456102	89.78508511	90.35844304	91.80029035	93.05748177	91.92384478	97.6689211	99.82771095	120.7004271
FAM234A	90.91305604	111.5095543	98.56070473	100.5594013	94.14791511	86.05159722	105.5108485	97.3273598	91.30980945	41.27042528	43.03616195	43.66168125	87.60809741	91.88243288	102.4536678
FUZ	62.68194712	71.24249779	63.61663912	91.45424977	85.04431645	89.41748123	105.5074105	93.06041882	95.13664102	59.41100088	58.5051294	53.58649246	86.49067488	93.68688962	112.1987105
ATPAF1	81.66423781	43.73721459	61.42438823	137.3491806	142.2339896	145.4625128	105.4310113	119.7543885	126.0201157	101.7266333	98.48929262	100.2699215	106.7562723	105.8898038	92.92017008
NDUFB7	141.8421381	176.9407664	159.9102255	78.1975787	77.56446819	78.79716651	105.4310113	95.84445246	92.57272991	155.0347715	158.5032584	156.5084383	101.0867302	108.0154727	122.2570795
TSPAN6	98.2636452	66.0296321	76.60469159	117.0027076	100.432546	112.0105103	105.3928116	111.8117043	122.0188605	125.5866207	116.104957	116.2990688	96.74410217	100.65436	106.0918437
NECTIN2	176.8987941	208.8112948	196.5166791	120.1910209	125.0537132	113.2435805	105.3928116	96.37669419	93.46621408	116.174977	119.9147688	122.0711218	115.8034141	121.045036	126.2884099
SUMO3	97.61743956	127.2278277	114.286589	153.878068	115.8207755	124.6594245	105.3164123	94.45243564	94.90355819	86.72682616	83.32548732	86.73679711	125.5341176	130.6892746	153.4699545
APMAP	123.7483801	150.7492949	136.953636	111.4231594	85.78450977	93.59400949	105.2782127	97.03176093	95.40857098	139.9246716	129.4204378	137.866267	102.5342729	105.7717111	122.7759636
DNAJB12	73.02123737	87.5168102	80.24465533	82.85419417	75.11014298	71.99539192	105.2782127	95.10750238	90.39729018	84.04303714	87.39934546	88.37481216	75.51347626	83.49155163	86.29441912
NOP9	77.97925015	93.65146312	82.13826374	87.84012884	83.40537262	75.34258099	105.027241	98.71814837	96.51687983	93.50541548	95.58138777	103.1302078	90.96317966	92.74017966	84.25081401
SPAG5	145.153942	106.2068409	126.3232873	68.2550754	71.83770936	75.93326142	105.0108152	102.8045366	106.1692282	185.1079143	185.3228245	189.5417419	99.8000256	103.8822276	86.33433329
SCAMP2	91.43809812	97.51873136	96.78994509	91.03473486	91.7839714	86.07625862	105.0108152	102.2313532	96.49629085	110.7338705	116.2181197	120.1211039	95.05530238	98.68614801	91.92231602
RAB35	60.86449376	78.06584232	73.62653943	119.6456515	100.938994	104.452983	104.8962163	97.40023597	92.14541139	105.2559997	102.7894762	104.0529562	96.22137843	101.638466	113.1167363
ZNF710	64.49940049	76.49774451	73.5851762	75.80634373	73.78558651	73.86488552	104.7816174	95.80351079	97.85594068	78.27105252	77.51646738	78.23471898	94.37174056	98.76487649	85.29656506
HDAC1	115.3477068	76.37060144	83.55371328	118.8485732	120.6125532	123.6252365	104.7434177	111.6888792	107.9561966	126.7630761	124.7430451	125.2301509	106.0727105	104.8663336	97.1510713
TMA7	161.1071437	165.4131284	154.5743696	129.4623004	97.6665604	107.3168881	104.7434177	100.5936863	112.4624646	105.145707	98.48929262	99.60691539	111.1793194	111.5976185	155.3060059
HPS4	31.26019786	29.32766715	28.33380871	76.14195566	71.83770936	75.97303788	104.7434177	103.5824283	99.48752048	59.44776511	60.50433756	55.73151217	74.50823829	80.42114096	67.49484863
ECH1	115.7047354	147.5707182	130.4596098	98.42532898	88.40479411	91.28697483	104.7434177	97.50914082	94.2043097	101.3957552	103.869803	99.38812338	111.5814146	114.7073934	133.4138861
ECE1	98.66752373	116.6325722	111.2257104	125.4349573	122.5993879	116.5052502	104.7434177	95.63974411	94.94240533	85.69742763	87.88971727	90.94883582	107.2789961	105.1812475	96.43261637
YIPF2	109.6934075	134.1359343	119.1260863	133.9930614	123.7681142	122.0739546	104.7434177	92.61006043	89.69804169	81.61659775	81.32627916	79.59973152	122.3977751	123.3675261	156.543345
RAB34	117.8113658	142.0611854	121.7733326	84.32249635	76.55157207	75.73437912	104.7434177	89.25284339	84.10405382	137.3879395	136.1347595	129.0131856	90.99414099	93.13579026	109.3248908
KTN1	48.58658659	43.1862613	74.70198326	123.7568976	148.7009418	161.6117554	104.7052181	122.3746555	137.5188686	88.74885899	90.98283179	88.84281647	109.2492625	108.6059363	90.84463364
NUBP2	123.3445016	161.5140744	136.9949992	85.16152616	79.04485482	79.23470757	104.7052181	95.47597742	91.91232856	83.96950867	88.26692636	83.57776808	89.38576024	97.26903539	109.364805
TATDN2	82.86375703	98.49349487	87.5460917	92.79669747	80.48044028	81.58788292	104.6246168	99.15090184	96.90923592	113.1114134	123.2987115	129.5065402	90.82244634	94.86151852	90.70453493
B2M	136.107063	101.5873095	132.90004	127.6583863	114.3403888	116.7041325	104.5906191	110.9109875	119.4937966	127.5718893	117.3874679	119.263096	93.12524548	88.37271731	104.6549338
CHD8	62.11651719	16.44383649	30.15379059	85.91665299	121.4696192	111.0956517	104.4760202	116.6018798	110.8697319	90.99147722	89.62487907	98.59290607	103.2178347	107.89738	53.12575016
NAA38	100.7273042	131.8049781	110.9775311	97.49526443	85.08327399	89.77546937	104.4378206	95.88539413	91.56270432	88.82238746	85.06064912	85.44978528	85.52564643	93.88371081	117.9064357
PAN2	72.85968596	67.80963502	73.25427041	85.58104107	93.65393346	97.21366732	104.3996209	107.3490621	109.0050693	70.18292121	77.47874647	73.7106774	116.5271854	120.8088505	101.1424875
INO80E	86.38961656	111.4620876	97.53448313	97.45331294	95.87451342	91.52563359	104.2468224	94.20678561	92.7669656	74.4843365	73.51805106	73.47667525	100.6444255	102.2682938	129.7210278
TUBB6	72.29425603	85.01802515	79.54148052	88.51764542	82.47311861	87.58776409	104.2086227	93.92019391	93.31082553	125.6969134	127.3080669	128.3501795	77.72499979	85.97149871	89.36780963
CTDNEP1	173.3042752	201.8184262	193.910796	119.9812635	115.1974548	111.4934163	104.1704231	99.07884449	92.14541139	129.0056944	123.4228133	122.5383461	124.9711844	123.1707049	127.2862639
KIAA2013	119.8307585	139.8573722	129.3428027	98.04063381	94.51099941	93.47468011	104.1704231	95.92633581	93.54390836	110.3662281	108.2212871	112.0090294	102.9363681	107.5431019	117.8266074
SPAG9	110.4203888	21.14812992	54.18582396	160.1707916	288.2079034	261.8882102	104.1322234	171.2999526	192.2156389	116.7999689	132.7398777	129.7151921	191.6385665	167.6129311	94.15750912
TCF19	83.48169118	98.06968465	90.95773045	65.02481062	55.16388094	54.69263198	104.1322234	98.2190694	97.04015078	105.5868778	100.5639426	105.3009677	65.90340127	68.72996188	66.93605036
BRD3	72.05192891	45.47483649	50.54586021	95.06207797	104.9516209	100.5946664	104.0940238	112.6714794	109.8597063	93.78555894	94.00050448	93.52285948	103.780768	104.0003203	76.2360502
SRSF7	116.115076	79.54917808	99.97491337	101.6904135	117.8465677	128.4779646	104.0558242	126.919181	133.0902949	149.1892584	142.7736394	143.2483165	107.6810913	98.68614801	87.97081394
CHD3	155.4932322	152.2750116	147.087626	100.4318688	105.1074511	107.6350997	103.8266263	102.4360615	97.7782464	174.9242217	182.8709654	188.7227344	125.5743271	131.2797382	95.63433313
ASCC2	88.20706992	103.4520744	94.96996322	71.31753422	67.74716734	67.93819303	103.8266263	95.39409408	92.41734135	99.15313699	109.1643098	110.0200111	64.37543956	71.052452	72.36437644
ERBB2	110.7031038	136.5092715	125.7442022	92.41913405	88.7063255	86.11603508	103.7884267	99.07884449	96.3409023	133.7482804	135.531225	133.9662311	102.9363681	107.0313667	99.62574937
PRPF4	52.34265688	58.95200145	52.77947433	100.8094322	84.26516559	88.54239912	103.750227	98.13718606	93.0777427	67.20501832	66.91689204	67.19761755	90.3909982	88.84508818	97.43047043
SFXN1	154.6046995	81.7106102	116.0652077	113.8563458	120.3398504	123.2274719	103.7120274	121.310172	123.2231218	165.7699276	148.9221476	142.7803122	127.9064792	129.7445328	106.3712428
ARMCX6	48.22309592	54.58675619	51.08358213	112.0524317	96.73157936	99.71958427	103.5974285	96.62234422	103.2168457	67.42560372	60.80610483	62.32257274	74.50823829	74.04413419	92.76051343
SIRT2	88.57056059	116.8444773	100.9676308	81.42784349	69.69504449	67.22221676	103.5974285	92.69194378	88.61032183	103.0501457	101.5446862	97.30589424	74.1061431	77.78373692	100.4639468
MECP2	116.3170153	96.12015764	101.1330837	95.85915629	124.2356047	115.1528506	103.5592288	115.9468131	115.4536942	115.9911558	124.2903942	125.8541566	112.0237193	114.3531153	77.23390426
MRPL14	113.7725806	144.8583328	127.191915	70.64631037	55.74824409	61.3750772	103.5592288	88.76154333	88.6880161	87.24152543	80.87362826	83.92877131	80.0973614	84.79057153	100.6635176
REEP2	207.876277	233.2651445	217.0742016	119.855409	112.0808513	105.9644884	103.5210292	90.2354435	94.28200398	113.5279522	116.2558406	112.4380333	150.7052764	156.3153944	174.983688
AAR2	57.95656838	73.1920248	67.46341899	105.1723872	91.70605631	89.93457521	103.4828295	89.9488518	85.3083151	76.57989779	77.44102556	79.2487283	78.52919017	83.25536619	100.024891
FAM83H	35.01626814	48.0176978	39.58460575	106.263126	105.5359841	106.4020295	103.4446299	96.54046088	92.61157705	83.82245174	89.43627453	92.89885374	114.6775475	123.3281618	115.511586
NASP	132.2298292	50.60294013	77.4733193	109.9968087	162.0244215	157.6341095	103.4064302	144.1556246	146.919876	170.3654567	164.8780919	172.6545867	136.9536209	138.4440297	81.94377542
PRKAB1	30.81593148	39.83816057	31.51877699	107.3538648	82.90165158	85.28072943	103.3682306	92.81476879	90.94115011	45.10971416	43.71853318	46.91743117	88.86303649	88.25462459	114.7133028
MEPCE	58.40083476	76.41298246	65.64343712	74.54779901	69.42234169	67.34154614	103.330031	95.84445246	90.90230297	92.93998158	91.77497087	100.542924	82.59035156	89.94728688	95.71416145
PREP	74.07132154	80.26965546	76.23242257	70.22679546	54.61847534	57.83497229	103.2918313	96.4995192	93.66044977	73.2711168	68.16168202	73.98367991	78.69002824	80.77541911	81.66437628
PFKM	124.6369129	134.6868876	121.6906062	89.69228716	79.08381237	81.18375409	103.215432	100.9212197	98.32210633	95.5134779	94.33999266	99.29491252	104.5849583	109.1963999	102.9386248
CTSD	211.0273372	261.506586	230.5929443	153.0604334	146.8524064	147.0734595	103.1653905	92.2026908	91.09964643	130.6027327	135.2249312	141.8275334	91.95997363	102.108475	122.5416674
PSMB6	108.6433233	130.2792613	115.7756651	114.6534241	105.1464087	108.86817	103.1390328	96.09010249	93.66044977	100.4031209	97.28222354	96.99389137	98.83499715	98.88296921	121.0197404
SGSM3	80.84153726	100.413779	88.12931317	62.29712469	66.27028689	67.79062237	103.0633975	98.83237563	93.52875797	99.86048084	97.20300963	92.95306424	77.07199721	82.67001995	77.70568966
POLA2	41.15522173	54.4172321	52.07629952	147.7111988	126.5340998	126.9266827	103.0244338	87.04199314	92.57272991	85.58713493	87.92743818	84.66977812	88.13926515	90.18347231	106.5308995
BTBD1	101.8985519	59.50295473	93.39816069	105.0045813	110.7173373	113.0049218	102.9862342	130.1945147	143.3847864	105.5133493	104.5623589	114.1150487	132.6109929	120.4939366	86.45407577
FLYWCH1	85.78379877	115.8273328	92.98452845	63.09504204	66.69531368	60.85798322	102.9862342	93.67454389	88.14415617	62.46243224	67.10549658	60.45055554	69.76351507	71.24927319	83.9793977
RRM1	92.36701873	31.74338539	68.33204671	158.4507804	200.9040494	198.1265454	102.9480345	129.2937979	132.8183649	123.270474	110.7485879	117.4690795	129.8365361	127.5794997	97.82961206
SCYL1	97.17317318	118.7092423	114.2038626	148.0468107	138.0655325	138.7800676	102.9098349	89.86696846	83.44365247	104.0795442	107.5045898	101.1279294	98.59374003	103.449221	114.4339036
CSNK1A1	67.66298098	22.93152332	39.83692142	110.9159658	139.8081034	139.1655015	102.8617034	137.018263	145.9343241	110.554461	107.5506093	101.6953846	118.3221383	114.1881791	82.47623035
KDM6B	64.17629767	67.68249196	66.63615451	96.40452567	116.0934783	100.7935487	102.7570363	109.1914373	102.0514316	75.18285693	78.23316465	70.82465088	109.128634	111.8338039	78.3515008
BHLHE40	79.24096666	62.51200729	71.51701498	138.8174828	137.9097024	135.8763861	102.7188367	110.1330957	99.25443765	111.6529763	114.0680279	120.238105	170.5285691	187.6099647	132.9939891
ANKFY1	49.63667076	18.47812554	28.04426614	94.13914517	126.68993	118.4542968	102.6806371	121.7195887	117.3183568	108.1236099	110.2582161	103.2339487	113.0289573	115.7702279	66.93605036
SEC14L1	140.2585304	100.7820701	120.3711193	125.9438288	130.7672264	119.346085	102.6806371	103.746195	104.5395908	134.9982644	134.5131376	134.3593548	125.1722319	126.2017513	93.27939754
EVL	114.1764591	132.3135503	126.6541931	76.05805267	81.73292529	79.83135446	102.6806371	101.4944031	92.7669656	102.5354464	108.673938	107.1339846	107.9625579	120.6907578	104.4952772
NUP214	63.32815276	59.41819269	61.01075599	90.48936548	91.93980157	85.36028235	102.6042378	98.13718606	97.19553933	86.9841758	87.39934546	94.53686879	106.7964819	113.1328238	84.41845349
FGFRL1	109.8549589	139.2640379	122.7246868	105.6758051	117.9634403	106.9191235	102.5660381	100.8393364	100.6529346	80.55043498	88.41781	86.50279496	99.55876849	104.5120554	105.3334746
ZDHHC16	48.02115666	62.08819707	52.77947433	74.63170199	64.82535161	71.19986272	102.4896388	93.06041882	93.93237974	68.27118109	69.63279746	68.67963117	67.35094395	66.52556447	84.73776679
ACTR3	124.6773008	57.12961751	90.42000853	89.4825297	106.5488802	107.3566645	102.4514392	122.8250138	134.7218747	131.6159549	123.4982551	125.8541566	122.6390323	115.6521352	105.4133029
DNAAF5	122.4963567	138.7554657	137.0777257	78.95270553	69.18859643	73.10913279	102.4132396	95.39409408	95.79704236	152.8289175	147.5641948	156.1964354	110.0132434	109.865592	107.648496
CCT8	201.6565477	92.34824669	163.5915525	116.7090472	136.0397403	143.2748076	102.3368403	130.4401647	137.0527029	202.2400469	186.8316608	201.2028491	159.7926276	155.8036593	107.5287535
ALDH9A1	103.2717389	96.84063501	100.4981582	112.1363347	83.6418449	89.61636353	102.3368403	97.03176093	97.73939926	118.3959043	111.3898434	112.945038	80.70935027	83.9639225	91.80257353
MORC2	85.74341092	55.34961459	66.92569708	98.62795468	110.4446345	106.4020295	102.1840417	107.0215287	105.3145912	108.2339026	105.8071489	111.6580261	109.3698911	105.1418833	76.59527766
SMG7	93.13438793	62.17295911	75.40515808	109.7870512	108.4967574	103.5779009	102.1458421	110.1740374	104.0326356	85.440078	85.92823002	86.15179173	133.8976975	132.5000296	93.19956922
SAP18	106.7854821	117.7344788	112.63206	131.9793898	107.8344791	111.3343105	102.1076424	103.3367783	102.0125844	113.4176595	105.5053816	108.1479939	105.7108249	107.2675522	120.7802554
FBXO42	30.3716651	31.40433722	31.39468732	97.95673083	95.6797257	96.61702042	102.1076424	102.6407699	100.9637117	53.49195933	54.58215489	50.46646379	75.99599048	74.51650506	70.84763827
TTLL4	79.44290592	99.38349633	86.28368609	70.39460143	71.56500656	67.42109906	102.1076424	92.44629375	89.85343025	90.36648525	96.37692173	99.37291324	86.00816066	91.12821406	89.48755212
SUMO1	73.70783086	52.04389488	73.08881751	125.6866662	122.9500058	122.8297073	102.0694428	118.1576633	125.7870329	92.31498961	87.1352991	90.20782901	108.2842341	101.6778302	86.13476247
POLR1D	136.5917173	146.9773839	133.1895826	121.1559052	96.92636708	103.2199127	102.0312431	100.3070946	96.61283226	96.68993337	96.64096809	97.03289173	109.2492625	106.6770886	124.8115858
FEN1	83.27975191	92.00919852	80.57556113	160.7161609	140.5198577	138.6607382	101.9930435	94.57526065	101.2356417	123.0131243	111.0503552	116.0260663	96.22137843	92.23041276	96.11330307
SGPL1	74.71752718	58.99438247	58.3221464	72.24046702	68.01987014	66.54601695	101.9548439	98.05530271	96.53513799	74.55786497	71.74516835	73.12567202	78.69002824	81.24778999	66.49699457
LSM12	87.27814931	46.95817225	68.33204671	128.2037556	134.6762263	128.9552821	101.8784446	118.8536717	114.9486814	63.3080096	63.37112662	65.28659998	110.0936624	108.3303866	93.47896836
YTHDF1	44.7497406	31.65862335	34.45556592	103.4943276	103.5881069	103.1801363	101.8784446	107.3081204	107.2181009	79.74162185	77.06381648	77.88371575	94.73362623	101.7565587	72.60386142
RAI1	48.26348377	41.36387736	46.40953777	104.5850664	126.3393121	121.5170841	101.8784446	107.3490621	101.313336	88.93268016	99.2814317	94.341867	111.460786	110.2198701	78.43132913
DGKD	70.23447555	74.84488465	73.33699686	101.3128501	92.71895243	94.4690916	101.8784446	95.31221074	93.23313125	88.60180206	95.47161992	91.45584048	97.34724495	101.5597375	86.57381826
TSPYL1	96.72890681	30.68385985	68.4974996	84.49030231	130.0402787	116.1472621	101.8020453	136.0901153	142.6078437	114.8147003	120.3296988	124.2161415	90.14974109	83.25536619	54.56266001
HEATR1	121.0020062	19.11384087	56.75034387	123.0017708	193.4631587	189.8100832	101.8005173	165.3224686	168.5126692	128.2336455	131.6459714	133.2642247	196.3430802	179.4977822	101.6214575
SBNO2	122.9002352	153.8854905	141.379501	88.76935436	90.26462722	86.47402322	101.5728474	95.02561904	89.42611173	90.47677795	92.49166814	90.90983546	97.8699687	102.307658	96.55235886
ARIH1	102.8274725	30.30243065	58.77714187	88.68545138	130.9752597	128.6370704	101.4582485	137.8915489	146.6867932	106.0648128	108.9379843	113.8030458	117.5324234	106.8345456	68.77210183
U2SURP	42.2860816	25.08956496	45.62363651	133.7833039	195.060418	190.6883474	101.4200489	154.4729257	175.7056053	115.8808631	122.8947205	117.8590831	187.4567765	165.5266264	106.2115862
DPH1	58.89114329	70.16771508	65.69348662	105.5541458	94.77902731	91.32834235	101.4200489	86.27106147	85.98891696	63.02235151	63.65893715	62.73324652	98.27849741	100.778751	116.5226117
FARSB	49.79822217	31.06528904	36.52372714	94.05524219	82.94060913	91.76429235	101.2672503	103.1730116	105.1592026	63.16095267	60.65522119	57.05752436	111.1793194	115.1010358	113.3163071
LZTS2	72.53658314	82.85489779	76.31514901	69.21995969	70.59106798	72.59203881	101.190851	94.3705523	96.3409023	98.19726693	95.13213175	95.86288098	75.15159059	83.88519402	73.3622305
EXOSC10	76.93885907	45.22055035	56.33671163	90.74107443	102.302508	97.65120837	101.1526514	111.0747542	104.2657185	113.6382449	111.8047734	118.8730924	110.5359671	109.8262277	94.19742328
NDUFS2	86.55116797	94.93348903	82.14736365	100.4318688	96.2251313	92.63937446	101.1526514	94.12490227	95.68050095	110.7706347	114.0680279	105.0279652	109.0482149	114.5499365	118.3055774
DDX47	103.5544539	94.2977737	95.59041158	110.709984	77.91508608	83.09302415	101.1526514	93.14230216	87.40606055	103.4913165	100.1112917	105.5739702	86.04837018	89.04190937	96.15321724
THOC5	86.99543435	109.7244657	96.58312897	73.91852665	67.55237963	63.76166477	101.0762521	94.32961063	84.25944237	113.1970741	115.4637015	110.7610179	80.0973614	81.83825358	93.67853917
MLLT4	130.0084973	19.07145985	51.2076718	102.1518799	194.9045878	184.244561	100.9234535	158.6080345	164.3233938	139.9982001	145.6404285	144.0283236	148.7752195	138.7195794	64.58111477
SUGP2	112.6417207	47.50912554	66.22252226	96.2786712	148.6230267	137.8652091	100.9234535	116.8475298	115.7644713	151.2480555	151.5626112	154.1294164	155.5706281	151.0799506	95.95364643
ZNF511	85.69454162	106.5480081	94.18819828	87.10052406	72.49609184	80.50755428	100.9234535	83.87883962	87.48375483	78.82251602	76.67529112	78.8470246	92.64273126	92.54532667	112.7575088
DCXR	90.67072893	110.8263722	92.69498588	144.564837	131.2479625	132.9329281	100.8470543	92.40535208	93.62160263	52.86696737	51.1495522	51.63647454	87.01339863	91.36439949	114.7931311
JMJD8	123.1021745	152.7412029	135.5472864	102.2357829	98.7573716	96.65679688	100.8088546	93.5107772	88.33839186	90.84442028	91.58636633	90.67583331	87.25465574	88.64826698	103.7768223
CDCA5	108.1990569	129.81307	113.9556832	154.2556314	137.7928297	137.0696799	100.770655	94.77996901	93.19428412	94.04290857	92.22762177	97.22789352	108.8873768	111.8731682	120.9399121
VPS52	56.34105428	74.37869341	65.85025324	59.86477726	51.5018719	52.78336192	100.7324553	96.90893592	87.13413058	69.59469348	71.44340108	70.51264801	65.42088705	66.72238567	75.03862532
KLC2	111.1473702	136.4245095	129.1359866	149.5151129	150.3371586	142.1212902	100.6178564	95.88539413	90.0088188	128.638052	133.1170868	127.5701724	100.1619113	107.9761085	111.4403414
RP11-834C11.4	130.7758665	156.9369241	147.4185318	105.4660477	87.53759921	90.57099856	100.6178564	92.73288545	84.4925252	102.0942756	100.6393844	108.381996	109.6915672	113.7626517	137.2648045
MAPK1IP1L	34.12773539	16.78288467	19.06844645	111.5490138	151.3890122	143.3543605	100.3886585	124.0942056	124.2331474	52.97726007	55.37429397	53.31348995	109.209053	104.4726912	67.49484863
NCAPH	92.32663088	69.5048759	85.08415259	60.66185558	65.60450248	62.92635912	100.2740596	103.5414867	97.97248209	134.8512074	128.2510896	126.8681659	106.032501	105.3387045	89.76695125
NAPA	99.93651005	120.2014781	107.8802528	92.98212306	84.60136919	85.42631127	100.2503758	91.25038753	91.07633815	104.315203	110.3913709	107.6366992	88.26029581	89.69181297	103.9189167
ADD2	89.17637838	77.76917516	75.32243163	78.61709361	78.53840676	80.03023676	100.1594607	92.77382712	91.25192721	120.1087499	121.7630933	116.5330709	120.910023	123.9973539	91.8424877
RQCD1	70.59796622	67.08915765	64.60935651	94.39085412	79.55130288	83.9283298	100.0830614	96.25386918	95.95243091	89.00620862	89.43627453	87.55580464	88.62177938	92.11232004	86.93304572
[truncated: 40,142 more rows]
[truncated: 7 more columns]
